# Supplementary material for: Genetic predisposition to uterine leiomyoma is determined by loci for genitourinary development and genome stability
Source: eLife. 2018 Sep 18;7:e37110. doi: 10.7554/eLife.37110 (PMC6203434; doi:10.7554/eLife.37110)
Supplement: Supplementary file 1. — For each of the 57 GRS SNPs, we report the allele frequency, association effect size and P-value, together with the heterogeneity estimates Cochrane's Q-value and I2 index. [file elife-37110-supp1.xlsx]

## Sheet: DESCRIPTION
Column	Description
rsid	rs-code (from UKBB imputed genotypes; March 2018)
chr	Chromosome
pos (hg19)	Position (hg19)
A	Allele A (follows the allele order in the UKBB data)
B	Allele B
In GRS? (LD pruning)	yes if SNP passes LD pruning (r-sq<0.3)
r2 (reference SNP)	r-squared and the reference SNP. NA for the highest association at the region or missing LD
A FREQ (UKBB)	Allele A frequency
INFO (UKBB)	Imputation INFO score
CHISQ_LINREG (UKBB)	Test statistic for linear regression
P_LINREG (UKBB)	Association based on linear regression (additive genotype model)
BETA (UKBB)	Beta
SE (UKBB)	Standard error of beta
CHISQ_BOLT_LMM_INF (UKBB)	Test statistic for the BOLT-LMM-inf
UKBB P (P_BOLT_LMM_INF)	Association based on the BOLT-LMM-inf
A FREQ (Helsinki)	Allele A frequency
BETA (Helsinki)	Beta
SE (Helsinki)	Standard error of beta
CHISQ_BOLT_LMM_INF (Helsinki)	Test statistic for the BOLT-LMM-inf
Helsinki P (P_BOLT_LMM_INF)	Association based on the BOLT-LMM-inf
SNP	chr:pos:A:B
N (cohort)	Number of cohorts in this stage
P	Fixed-effects meta-analysis p-value
P(R)	Random-effects meta-analysis p-value
BETA	Fixed-effects estimate
BETA(R)	Random-effects estimate
Cochrane-Q	p-value for Cochrane's Q statistic
I^2 heterogeneity index	I^2 heterogeneity index (0-100)

## Sheet: DATA
rsid	chr	pos (hg19)	A	B	In GRS? (LD pruning)	r2 (reference SNP)	A FREQ (UKBB)	INFO (UKBB)	CHISQ_LINREG (UKBB)	P_LINREG (UKBB)	BETA (UKBB)	SE (UKBB)	CHISQ_BOLT_LMM_INF (UKBB)	UKBB P (P_BOLT_LMM_INF)	A FREQ (Helsinki)	BETA (Helsinki)	SE (Helsinki)	CHISQ_BOLT_LMM_INF (Helsinki)	Helsinki P (P_BOLT_LMM_INF)	SNP	N (cohort)	P	P(R)	BETA	BETA(R)	Cochrane-Q	I^2 heterogeneity index
rs2235529	1	22450487	C	T	yes	NA	0.843277	0.993003	74.3275	6.6e-18	-0.00498025	0.000581413	73.3725	1.1e-17	0.840793	-0.00324805	0.00247032	1.72878	0.19	1:22450487:C:T	2	5.662e-18	5.662e-18	-0.0049	-0.0049	0.4949	0
rs2092315	1	22507684	C	T	yes	0.14 (rs2235529)	0.751999	0.994427	29.951	4.4e-08	-0.00270279	0.000489681	30.4648	3.4e-08	0.801982	-0.00499983	0.00226887	4.85612	0.028	1:22507684:C:T	2	4.624e-09	4.624e-09	-0.0028	-0.0028	0.3224	0
rs10929757	2	11702661	A	C	yes	NA	0.420739	0.976063	36.9236	1.2e-09	-0.00262821	0.000432387	36.9466	1.2e-09	0.338445	-0.000996111	0.00191867	0.269535	0.6	2:11702661:A:C	2	1.505e-09	1.505e-09	-0.0025	-0.0025	0.4066	0
rs11674184	2	11721535	T	G	yes	0.30 (rs10929757)	0.61414	0.987957	30.1341	4e-08	0.00238891	0.000435556	30.0822	4.1e-08	0.594909	0.00150854	0.00183528	0.675629	0.41	2:11721535:T:G	2	3.27e-08	3.27e-08	0.0023	0.0023	0.6407	0
rs10936600	3	169514585	A	T	yes	NA	0.755508	0.998839	47.0787	6.8e-12	0.00337574	0.000491405	47.191	6.4e-12	0.73253	0.00554927	0.00205028	7.32567	0.0068	3:169514585:A:T	2	2.647e-13	1.976e-09	0.0035	0.0036	0.3026	5.91
rs143835293	3	197623337	A	G	yes	NA	0.998226	0.624176	44.6494	2.4e-11	-0.0425084	0.00632675	45.1429	1.8e-11	0.98689	-0.000788754	0.00795009	0.00984327	0.92	3:197623337:A:G	2	1.043e-07	0.2932	-0.0263	-0.0219	0	94.07
rs62323680	4	54546192	G	A	yes	NA	0.933029	0.991149	51.4685	7.3e-13	-0.00607481	0.00084888	51.2121	8.3e-13	0.95061	-0.00549116	0.00419373	1.71446	0.19	4:54546192:G:A	2	3.495e-13	3.495e-13	-0.0061	-0.0061	0.8915	0
rs2202282	4	70634441	C	T	yes	NA	0.503285	0.997982	37.3616	9.8e-10	-0.00258904	0.000422265	37.593	8.7e-10	0.558079	-4.25226e-05	0.00182502	0.000542881	0.98	4:70634441:C:T	2	2.248e-09	0.08207	-0.0025	-0.0019	0.174	45.89
rs72709458	5	1283755	C	T	yes	NA	0.793693	0.974364	65.3881	6.2e-16	-0.00426274	0.000528061	65.1645	6.9e-16	0.765945	-0.0027044	0.00213034	1.61154	0.2	5:1283755:C:T	2	3.929e-16	3.929e-16	-0.0042	-0.0042	0.4777	0
rs2736100	5	1286516	C	A	yes	0.23 (rs72709458)	0.50203	1	60.9205	5.9e-15	0.00329978	0.000422914	60.879	6.1e-15	0.488384	0.00136801	0.00180686	0.573227	0.45	5:1286516:C:A	2	7.867e-15	8.031e-09	0.0032	0.0031	0.2979	7.72
rs2853676	5	1288547	T	C	yes	0.23 (rs2736100)	0.268877	1	50.2951	1.3e-12	0.00336142	0.00047652	49.7605	1.7e-12	0.220427	0.000157759	0.00218317	0.00522173	0.94	5:1288547:T:C	2	4.941e-12	0.08582	0.0032	0.0025	0.1517	51.35
rs2456181	5	176450837	C	G	yes	NA	0.516362	0.994062	33.3142	7.8e-09	-0.00246344	0.000424084	33.7428	6.3e-09	0.497409	-0.00365694	0.00179766	4.13829	0.042	5:176450837:C:G	2	9.314e-10	9.314e-10	-0.0025	-0.0025	0.5182	0
rs4870084	6	152543949	C	T	yes	0.29 (rs6904757)	0.810936	0.978443	32.5935	1.1e-08	0.00312055	0.000543704	32.9411	9.5e-09	0.77128	0.0047593	0.00216003	4.85476	0.028	6:152543949:C:T	2	1.037e-09	1.037e-09	0.0032	0.0032	0.4619	0
rs6928363	6	152546094	G	A	yes	0.17 (rs58415480)	0.514795	0.991964	46.2146	1.1e-11	0.00290281	0.000424102	46.8486	7.7e-12	0.406433	0.00262521	0.00183567	2.04521	0.15	6:152546094:G:A	2	2.732e-12	2.732e-12	0.0029	0.0029	0.8829	0
rs58415480	6	152562271	C	G	yes	NA	0.84544	0.985055	124.064	8.2e-29	-0.00657734	0.000589069	124.672	6e-29	0.760976	-0.00457954	0.00212062	4.66359	0.031	6:152562271:C:G	2	8.675e-30	8.675e-30	-0.0064	-0.0064	0.364	0
rs75510204	6	152592680	T	G	yes	0.07 (rs58415480)	0.988015	0.872008	33.7872	6.1e-09	-0.0118339	0.0020706	32.6638	1.1e-08	0.984543	-0.00580227	0.00737586	0.618829	0.43	6:152592680:T:G	2	1.096e-08	1.096e-08	-0.0114	-0.0114	0.4311	0
rs6904757	6	152593102	A	G	yes	0.08 (rs6928363)	0.637124	0.982353	40.6031	1.9e-10	0.00283083	0.000441912	41.0351	1.5e-10	0.637012	0.00321853	0.0018846	2.91661	0.088	6:152593102:A:G	2	3.435e-11	3.435e-11	0.0029	0.0029	0.8413	0
rs144444583	6	152684585	T	C	yes	0.30 (rs58415480)	0.871661	0.981081	45.2733	1.7e-11	-0.00428384	0.000636579	45.2857	1.7e-11	0.749268	-0.00369826	0.00208835	3.1361	0.077	6:152684585:T:C	2	3.566e-12	3.566e-12	-0.0042	-0.0042	0.7885	0
rs138821078	9	674217	C	G	yes	0.13 (rs10975820)	0.978873	0.962209	31.947	1.6e-08	-0.00843686	0.00149567	31.8193	1.7e-08	0.98122	-0.0131487	0.00665116	3.90818	0.048	9:674217:C:G	2	2.9e-09	2.9e-09	-0.0087	-0.0087	0.4895	0
rs10975820	9	684160	G	A	yes	0.00 (rs7027685)	0.85766	0.987339	48.5536	3.2e-12	-0.00423556	0.00060755	48.6024	3.1e-12	0.744299	-0.00446102	0.00208765	4.5662	0.033	9:684160:G:A	2	3.078e-13	3.078e-13	-0.0043	-0.0043	0.9174	0
rs7027685	9	802228	A	T	yes	NA	0.598131	0.985208	76.5696	2.1e-18	-0.00376223	0.000433204	75.4235	3.8e-18	0.455396	-0.00309918	0.00180189	2.95824	0.085	9:802228:A:T	2	9.063e-19	9.063e-19	-0.0037	-0.0037	0.7205	0
rs114680331	9	815682	T	C	yes	0.12 (rs7027685)	0.900182	0.950577	35.3112	2.8e-09	-0.00429937	0.000720808	35.5771	2.5e-09	0.79314	-0.0033541	0.00223344	2.25529	0.13	9:815682:T:C	2	8.378e-10	8.378e-10	-0.0042	-0.0042	0.6871	0
rs4742448	9	826585	C	G	yes	0.28 (rs7027685)	0.541753	0.954467	34.1167	5.2e-09	-0.00251208	0.000432644	33.7137	6.4e-09	0.460183	-0.00245113	0.00179652	1.86152	0.17	9:826585:C:G	2	2.455e-09	2.455e-09	-0.0025	-0.0025	0.9737	0
rs2277163	9	827224	A	G	yes	0.07 (rs7027685)	0.0529084	0.978789	33.8858	5.8e-09	0.005483	0.000951432	33.2109	8.3e-09	0.0350915	-0.00283124	0.00489981	0.333885	0.56	9:827224:A:G	2	2.905e-08	0.4883	0.0052	0.0027	0.0958	63.96
rs1265164	10	105674854	A	G	yes	NA	0.130804	0.997562	33.0204	9.1e-09	0.0035879	0.000626741	32.772	1e-08	0.118659	0.00127286	0.0027967	0.207144	0.65	10:105674854:A:G	2	1.303e-08	1.303e-08	0.0035	0.0035	0.4192	0
rs11246003	11	213723	T	G	yes	0.00 (rs507139)	0.955576	0.997999	31.6912	1.8e-08	0.00583195	0.00102557	32.3367	1.3e-08	0.978415	0.00741937	0.00619574	1.43399	0.23	11:213723:T:G	2	6.407e-09	6.407e-09	0.0059	0.0059	0.8004	0
rs507139	11	225196	G	A	yes	NA	0.92558	0.984107	53.4899	2.6e-13	0.00590577	0.000810591	53.0823	3.2e-13	0.91064	0.00573513	0.00316568	3.28211	0.07	11:225196:G:A	2	6.029e-14	6.029e-14	0.0059	0.0059	0.9584	0
rs2207548	11	32368744	C	A	yes	0.24 (rs10835889)	0.576511	0.983953	61.5624	4.3e-15	-0.00339605	0.000430052	62.36	2.9e-15	0.665915	-0.00268468	0.00192386	1.94733	0.16	11:32368744:C:A	2	1.137e-15	1.137e-15	-0.0034	-0.0034	0.7182	0
rs10835889	11	32370380	G	A	yes	NA	0.841048	0.982329	79.5365	4.7e-19	-0.00516992	0.000580801	79.2341	5.5e-19	0.926677	-0.001383	0.00346653	0.159168	0.69	11:32370380:G:A	2	9.159e-19	1.156e-05	-0.0051	-0.0048	0.2813	13.85
rs7120483	11	32406983	G	C	yes	0.30 (rs10835889)	0.879824	0.989997	44.1617	3e-11	-0.00434169	0.000650987	44.4807	2.6e-11	0.925762	-0.0049778	0.00345484	2.07596	0.15	11:32406983:G:C	2	9.05e-12	9.05e-12	-0.0044	-0.0044	0.8564	0
rs11031783	11	32459923	C	A	yes	0.28 (rs10835889)	0.796331	0.993865	37.15	1.1e-09	-0.00317873	0.000524803	36.6872	1.4e-09	0.79311	-0.00288871	0.00223311	1.67335	0.2	11:32459923:C:A	2	5.929e-10	5.929e-10	-0.0032	-0.0032	0.8994	0
rs2553772	11	35085453	T	G	yes	NA	0.461813	0.995341	34.3154	4.7e-09	-0.0024878	0.000423809	34.4579	4.4e-09	0.472652	-0.00232489	0.00181662	1.63787	0.2	11:35085453:T:G	2	1.886e-09	1.886e-09	-0.0025	-0.0025	0.9304	0
rs59021565	11	107999907	C	G	yes	0.27 (rs141379009)	0.908654	0.98241	31.4176	2.1e-08	-0.00410273	0.00073828	30.8819	2.7e-08	0.951433	0.00255057	0.0042136	0.36641	0.54	11:107999907:C:G	2	7.905e-08	0.4996	-0.0039	-0.0021	0.1199	58.66
rs141379009	11	108149207	T	G	yes	NA	0.972885	0.999367	77.1287	1.6e-18	-0.0113839	0.00129969	76.719	2e-18	0.992226	0.0074739	0.0103419	0.522269	0.47	11:108149207:T:G	2	7.939e-18	0.5982	-0.0111	-0.0047	0.0704	69.45
rs4988023	11	108168995	A	C	yes	0.00 (rs141379009)	0.855739	0.998256	42.8475	5.9e-11	0.0039725	0.000600935	43.6991	3.8e-11	0.758262	0.00279044	0.00212221	1.72889	0.19	11:108168995:A:C	2	1.834e-11	1.834e-11	0.0039	0.0039	0.592	0
rs12223381	11	108354102	C	T	yes	0.12 (rs59021565)	0.594433	0.992523	30.3032	3.7e-08	-0.00237165	0.000431322	30.2341	3.8e-08	0.614024	-0.00174297	0.00186793	0.870683	0.35	11:108354102:C:T	2	2.584e-08	2.584e-08	-0.0023	-0.0023	0.743	0
rs9669403	12	46798900	G	A	yes	0.28 (rs12832777)	0.597681	0.980037	36.8404	1.3e-09	-0.002643	0.000434519	36.9979	1.2e-09	0.598933	0.000947282	0.00184616	0.263282	0.61	12:46798900:G:A	2	6.504e-09	0.4558	-0.0025	-0.0013	0.0584	72.09
rs12832777	12	46831129	T	C	yes	NA	0.298767	0.999678	44.4802	2.6e-11	-0.0030827	0.000460908	44.7336	2.3e-11	0.339939	-0.000918874	0.00189435	0.235284	0.63	12:46831129:T:C	2	3.756e-11	0.0002075	-0.003	-0.0028	0.2671	18.82
rs117245733	13	40723944	G	A	yes	0.00 (rs7986407)	0.983621	0.907964	34.7732	3.7e-09	-0.0102115	0.00173806	34.5185	4.2e-09	0.969878	-0.0237702	0.00532723	19.9097	8.1e-06	13:40723944:G:A	2	3.182e-12	0.01679	-0.0115	-0.0161	0.0155	82.92
rs7986407	13	41179798	A	G	yes	NA	0.690035	0.99931	46.6922	8.3e-12	-0.00309001	0.000455879	45.9431	1.2e-11	0.64436	0.000848465	0.0018955	0.200363	0.65	13:41179798:A:G	2	8.841e-11	0.4198	-0.0029	-0.0016	0.0434	75.5
rs66998222	16	51481596	G	A	yes	NA	0.798722	0.993765	42.8336	6e-11	0.00342548	0.000528228	42.0534	8.9e-11	0.84628	0.00782403	0.00250445	9.75967	0.0018	16:51481596:G:A	2	2.749e-12	0.01808	0.0036	0.0049	0.0857	66.14
rs78378222	17	7571752	T	G	yes	NA	0.987391	0.954826	104.29	1.7e-24	-0.0198374	0.00193173	105.457	9.7e-25	0.983049	-0.0126741	0.00697967	3.29734	0.069	17:7571752:T:G	2	3.009e-25	3.009e-25	-0.0193	-0.0193	0.3226	0
rs733381	22	40669648	A	G	yes	NA	0.787377	0.998452	43.3721	4.5e-11	-0.00337752	0.000515553	42.919	5.7e-11	0.751707	-0.00377267	0.00209671	3.23758	0.072	22:40669648:A:G	2	1.111e-11	1.111e-11	-0.0034	-0.0034	0.8548	0
rs5936989	X	70022420	T	A	yes	0.27 (rs5937008)	0.217636	0.994491	32.8917	9.7e-09	0.0053098	0.000929891	32.6056	1.1e-08	0.31258	0.00697589	0.00333393	4.37809	0.036	X:70022420:T:A	2	1.342e-09	1.342e-09	0.0054	0.0054	0.6303	0
rs5937008	X	70093038	C	T	yes	NA	0.479813	1	64.2615	1.1e-15	0.00621929	0.000768049	65.5698	5.6e-16	0.505504	0.00533856	0.00313172	2.90591	0.088	X:70093038:C:T	2	1.334e-16	1.334e-16	0.0062	0.0062	0.7847	0
rs7059898	X	70149078	C	A	yes	0.27 (rs5937008)	0.640689	0.955657	32.0856	1.5e-08	-0.00457074	0.000811098	31.756	1.7e-08	0.656958	-0.00861527	0.00327598	6.91602	0.0085	X:70149078:C:A	2	1.047e-09	0.0007898	-0.0048	-0.0053	0.2308	30.37
rs7888560	X	131171122	A	G	yes	0.19 (rs5930554)	0.771576	0.993882	31.4317	2.1e-08	-0.00516588	0.000915637	31.8304	1.7e-08	0.785539	-0.00251519	0.00378636	0.441265	0.51	X:131171122:A:G	2	1.701e-08	1.701e-08	-0.005	-0.005	0.4962	0
rs5930554	X	131312089	T	C	yes	NA	0.68942	0.994802	107.51	3.4e-25	-0.0085794	0.000829109	107.076	4.3e-25	0.696291	-0.000601855	0.00338859	0.0315462	0.86	X:131312089:T:C	2	5.905e-24	0.1803	-0.0081	-0.0053	0.0222	80.88
rs5933158	X	131578034	A	G	yes	0.21 (rs5930554)	0.414247	0.925879	39.7663	2.9e-10	-0.00497522	0.000798385	38.8329	4.6e-10	0.359662	-0.0027778	0.00325616	0.727765	0.39	X:131578034:A:G	2	3.963e-10	3.963e-10	-0.0049	-0.0049	0.5122	0
rs5975338	X	131626317	A	G	yes	0.28 (rs5930554)	0.870696	0.986864	32.0656	1.5e-08	-0.00649623	0.00114479	32.2008	1.4e-08	0.846035	0.00289353	0.00431638	0.449382	0.5	X:131626317:A:G	2	1.078e-07	0.5541	-0.0059	-0.0027	0.0355	77.38
rs17631680	2	67090367	T	C	yes (stage 2)	NA	0.900271	0.979538	26.8381	2.2e-07	0.004	0.0007	26.8997	2.1e-07	0.896037	0.005	0.0029	3.47129	0.062	2:67090367:T:C	2	4.287e-08	4.287e-08	0.0038	0.0038	0.5508	0
rs1735537	3	128122820	T	C	yes (stage 2)	NA	0.754586	0.987309	27.5829	1.5e-07	-0.003	0.0005	27.9804	1.2e-07	0.752774	-0.004	0.0021	2.92318	0.087	3:128122820:T:C	2	3.013e-08	3.013e-08	-0.0027	-0.0027	0.6513	0
rs67751869	4	54568834	T	C	yes (stage 2)	0.14 (rs62323680)	0.940085	0.977459	28.4719	9.5e-08	-0.005	0.0009	28.3914	9.9e-08	0.941951	-0.011	0.0039	8.38835	0.0037	4:54568834:T:C	2	5.046e-09	0.02206	-0.0051	-0.0069	0.1063	61.66
rs6901631	6	152567047	T	C	yes (stage 2)	0.26 (rs6904757)	0.865525	0.988513	29.5736	5.4e-08	0.003	0.0006	29.541	5.4e-08	0.906646	0.005	0.0031	2.41056	0.12	6:152567047:T:C	2	1.763e-08	1.763e-08	0.0034	0.0034	0.6451	0
rs11790408	9	876418	G	T	yes (stage 2)	0.10 (rs4742448)	0.582831	0.994034	29.1769	6.6e-08	0.002	0.0004	29.192	6.5e-08	0.636646	0.002	0.0019	0.711937	0.39	9:876418:G:T	2	4.892e-08	4.892e-08	0.0023	0.0023	0.7037	0
rs10415391	19	22652436	C	T	yes (stage 2)	NA	0.903394	1	26.7717	2.3e-07	-0.004	0.0007	26.3661	2.8e-07	0.879268	-0.006	0.0028	5.3573	0.02	19:22652436:C:T	2	2.87e-08	2.87e-08	-0.0038	-0.0038	0.335	0
rs62132801	19	49267882	A	T	yes (stage 2)	NA	0.904482	0.950162	26.8683	2.2e-07	0.004	0.0007	26.0456	3.3e-07	0.893933	0.006	0.0029	4.80041	0.028	19:49267882:A:T	2	4.198e-08	4.198e-08	0.0039	0.0039	0.374	0
