# Supplementary material for: Genetic predisposition to uterine leiomyoma is determined by loci for genitourinary development and genome stability
Source: eLife. 2018 Sep 18;7:e37110. doi: 10.7554/eLife.37110 (PMC6203434; doi:10.7554/eLife.37110)
Supplement: Supplementary file 2. — For each of the 57 GRS SNPs, we report the allele frequency, association effect size and P-value, together with the heterogeneity estimates Cochrane's Q-value and I2 index. [file elife-37110-supp2.xlsx]

## Sheet: DESCRIPTION
Column	Description
rsid	rs-code (from UKBB imputed genotypes; March 2018)
chr	Chromosome
pos (hg19)	Position (hg19)
A	Allele A (follows the allele order in the UKBB data)
B	Allele B
In GRS? (LD pruning)	yes if SNP passes LD pruning (r-sq<0.3)
r2 (reference SNP)	r-squared and the reference SNP. NA if LD was not available.
A FREQ (UKBB)	Allele A frequency
INFO (UKBB)	Imputation INFO score
CHISQ_LINREG (UKBB)	Test statistic for linear regression
P_LINREG (UKBB)	Association based on linear regression (additive genotype model)
BETA (UKBB)	Beta
SE (UKBB)	Standard error of beta
CHISQ_BOLT_LMM_INF (UKBB)	Test statistic for the BOLT-LMM-inf
UKBB P (P_BOLT_LMM_INF)	Association based the BOLT-LMM-inf
A FREQ (Helsinki)	Allele A frequency
BETA (Helsinki)	Beta
SE (Helsinki)	Standard error of beta
CHISQ_BOLT_LMM_INF (Helsinki)	Test statistic for the BOLT-LMM-inf
Helsinki P (P_BOLT_LMM_INF)	Association based the BOLT-LMM-inf
A FREQ (NFBC)	Allele A frequency
BETA (NFBC)	Beta
SE (NFBC)	Standard error of beta
CHISQ_BOLT_LMM_INF	Test statistic for the BOLT-LMM-inf
NFBC P (P_BOLT_LMM_INF)	Association based the BOLT-LMM-inf
SNP	chr:pos:A:B
N (cohort)	Number of cohorts in this stage
P	Fixed-effects meta-analysis p-value
P(R)	Random-effects meta-analysis p-value
BETA	Fixed-effects estimate
BETA(R)	Random-effects estimate
Cochrane-Q	p-value for Cochrane's Q statistic
I^2 heterogeneity index	I^2 heterogeneity index (0-100)

## Sheet: DATA
rsid	chr	pos (hg19)	A	B	In GRS? (LD pruning)	r2 (reference SNP)	A FREQ (UKBB)	INFO (UKBB)	CHISQ_LINREG (UKBB)	P_LINREG (UKBB)	BETA (UKBB)	SE (UKBB)	CHISQ_BOLT_LMM_INF (UKBB)	UKBB P (P_BOLT_LMM_INF)	A FREQ (Helsinki)	BETA (Helsinki)	SE (Helsinki)	CHISQ_BOLT_LMM_INF (Helsinki)	Helsinki P (P_BOLT_LMM_INF)	A FREQ (NFBC)	BETA (NFBC)	SE (NFBC)	CHISQ_BOLT_LMM_INF	NFBC P (P_BOLT_LMM_INF)	SNP	N (cohort)	P	P(R)	BETA	BETA(R)	Cochrane-Q	I^2 heterogeneity index
rs2235529	1	22450487	C	T	yes	NA	0.843277	0.993003	74.3275	6.6e-18	-0.00498025	0.000581413	73.3725	1.1e-17	0.840793	-0.00324805	0.00247032	1.72878	0.19	0.832192	-0.011848	0.00720665	2.70285	0.1	1:22450487:C:T	3	2.303e-18	2.303e-18	-0.0049	-0.0049	0.4984	0
rs2092315	1	22507684	C	T	yes	0.14 (rs2235529)	0.751999	0.994427	29.951	4.4e-08	-0.00270279	0.000489681	30.4648	3.4e-08	0.801982	-0.00499983	0.00226887	4.85612	0.028	0.798038	-0.0142599	0.00672936	4.49039	0.034	1:22507684:C:T	3	2.026e-09	0.01751	-0.0029	-0.0041	0.145	48.22
rs10929757	2	11702661	A	C	yes	NA	0.420739	0.976063	36.9236	1.2e-09	-0.00262821	0.000432387	36.9466	1.2e-09	0.338445	-0.000996111	0.00191867	0.269535	0.6	0.351629	-0.0115812	0.00559994	4.277	0.039	2:11702661:A:C	3	6.327e-10	0.04023	-0.0026	-0.0026	0.1944	38.94
rs11674184	2	11721535	T	G	yes	0.30 (rs10929757)	0.61414	0.987957	30.1341	4e-08	0.00238891	0.000435556	30.0822	4.1e-08	0.594909	0.00150854	0.00183528	0.675629	0.41	0.579137	0.00766105	0.00539878	2.01365	0.16	2:11721535:T:G	3	1.905e-08	1.905e-08	0.0024	0.0024	0.5536	0
rs10936600	3	169514585	A	T	yes	NA	0.755508	0.998839	47.0787	6.8e-12	0.00337574	0.000491405	47.191	6.4e-12	0.73253	0.00554927	0.00205028	7.32567	0.0068	0.720474	0.005806	0.00598033	0.942549	0.33	3:169514585:A:T	3	1.767e-13	1.767e-13	0.0035	0.0035	0.5457	0
rs143835293	3	197623337	A	G	yes	NA	0.998226	0.624176	44.6494	2.4e-11	-0.0425084	0.00632675	45.1429	1.8e-11	0.98689	-0.000788754	0.00795009	0.00984327	0.92	0.987597	0.017953	0.0240368	0.557855	0.46	3:197623337:A:G	3	4.214e-07	0.497	-0.0245	-0.0124	0	90.06
rs62323680	4	54546192	G	A	yes	NA	0.933029	0.991149	51.4685	7.3e-13	-0.00607481	0.00084888	51.2121	8.3e-13	0.95061	-0.00549116	0.00419373	1.71446	0.19	0.950389	-0.0088709	0.0123919	0.512457	0.47	4:54546192:G:A	3	2.764e-13	2.764e-13	-0.0061	-0.0061	0.9655	0
rs2202282	4	70634441	C	T	yes	NA	0.503285	0.997982	37.3616	9.8e-10	-0.00258904	0.000422265	37.593	8.7e-10	0.558079	-4.25226e-05	0.00182502	0.000542881	0.98	0.554795	-0.00313514	0.00538975	0.338359	0.56	4:70634441:C:T	3	1.905e-09	1.905e-09	-0.0025	-0.0025	0.3938	0
rs72709458	5	1283755	C	T	yes	NA	0.793693	0.974364	65.3881	6.2e-16	-0.00426274	0.000528061	65.1645	6.9e-16	0.765945	-0.0027044	0.00213034	1.61154	0.2	0.775731	-0.00316565	0.00638661	0.245688	0.62	5:1283755:C:T	3	3.512e-16	3.512e-16	-0.0042	-0.0042	0.7677	0
rs2736100	5	1286516	C	A	yes	0.23 (rs72709458)	0.50203	1	60.9205	5.9e-15	0.00329978	0.000422914	60.879	6.1e-15	0.488384	0.00136801	0.00180686	0.573227	0.45	0.484913	0.00545167	0.00537497	1.02874	0.31	5:1286516:C:A	3	5.098e-15	5.098e-15	0.0032	0.0032	0.5331	0
rs2853676	5	1288547	T	C	yes	0.23 (rs2736100)	0.268877	1	50.2951	1.3e-12	0.00336142	0.00047652	49.7605	1.7e-12	0.220427	0.000157759	0.00218317	0.00522173	0.94	0.212977	0.00291751	0.0065165	0.200445	0.65	5:1288547:T:C	3	4.466e-12	4.394e-08	0.0032	0.0031	0.3574	2.8
rs2456181	5	176450837	C	G	yes	NA	0.516362	0.994062	33.3142	7.8e-09	-0.00246344	0.000424084	33.7428	6.3e-09	0.497409	-0.00365694	0.00179766	4.13829	0.042	0.498982	0.00923704	0.00538408	2.94336	0.086	5:176450837:C:G	3	2.348e-09	0.2597	-0.0025	-0.0019	0.0757	61.26
rs4870084	6	152543949	C	T	yes	0.29 (rs6904757)	0.810936	0.978443	32.5935	1.1e-08	0.00312055	0.000543704	32.9411	9.5e-09	0.77128	0.0047593	0.00216003	4.85476	0.028	0.782951	-0.00111018	0.00651606	0.0290279	0.86	6:152543949:C:T	3	1.279e-09	1.279e-09	0.0032	0.0032	0.6127	0
rs6928363	6	152546094	G	A	yes	0.17 (rs58415480)	0.514795	0.991964	46.2146	1.1e-11	0.00290281	0.000424102	46.8486	7.7e-12	0.406433	0.00262521	0.00183567	2.04521	0.15	0.389856	0.00578741	0.00547348	1.118	0.29	6:152546094:G:A	3	1.781e-12	1.781e-12	0.0029	0.0029	0.8605	0
rs58415480	6	152562271	C	G	yes	NA	0.84544	0.985055	124.064	8.2e-29	-0.00657734	0.000589069	124.672	6e-29	0.760976	-0.00457954	0.00212062	4.66359	0.031	0.778878	-0.00996908	0.00643334	2.40125	0.12	6:152562271:C:G	3	3.009e-30	3.009e-30	-0.0065	-0.0065	0.5702	0
rs75510204	6	152592680	T	G	yes	0.07 (rs58415480)	0.988015	0.872008	33.7872	6.1e-09	-0.0118339	0.0020706	32.6638	1.1e-08	0.984543	-0.00580227	0.00737586	0.618829	0.43	0.984265	0.00876215	0.0216107	0.164394	0.69	6:152592680:T:G	3	1.57e-08	1.57e-08	-0.0112	-0.0112	0.4765	0
rs6904757	6	152593102	A	G	yes	0.08 (rs6928363)	0.637124	0.982353	40.6031	1.9e-10	0.00283083	0.000441912	41.0351	1.5e-10	0.637012	0.00321853	0.0018846	2.91661	0.088	0.623195	0.00457631	0.00548277	0.696674	0.4	6:152593102:A:G	3	2.531e-11	2.531e-11	0.0029	0.0029	0.9331	0
rs144444583	6	152684585	T	C	yes	0.30 (rs58415480)	0.871661	0.981081	45.2733	1.7e-11	-0.00428384	0.000636579	45.2857	1.7e-11	0.749268	-0.00369826	0.00208835	3.1361	0.077	0.751759	-0.0174246	0.00616096	7.99891	0.0047	6:152684585:T:C	3	6.116e-13	0.005786	-0.0044	-0.0051	0.0997	56.63
rs138821078	9	674217	C	G	yes	0.13 (rs10975820)	0.978873	0.962209	31.947	1.6e-08	-0.00843686	0.00149567	31.8193	1.7e-08	0.98122	-0.0131487	0.00665116	3.90818	0.048	0.980007	0.0161092	0.019374	0.691365	0.41	9:674217:C:G	3	4.687e-09	1.643e-05	-0.0085	-0.0086	0.3493	4.92
rs10975820	9	684160	G	A	yes	0.00 (rs7027685)	0.85766	0.987339	48.5536	3.2e-12	-0.00423556	0.00060755	48.6024	3.1e-12	0.744299	-0.00446102	0.00208765	4.5662	0.033	0.749815	-0.00702134	0.00619439	1.28482	0.26	9:684160:G:A	3	1.77e-13	1.77e-13	-0.0043	-0.0043	0.9009	0
rs7027685	9	802228	A	T	yes	NA	0.598131	0.985208	76.5696	2.1e-18	-0.00376223	0.000433204	75.4235	3.8e-18	0.455396	-0.00309918	0.00180189	2.95824	0.085	0.461033	0.0034851	0.00539296	0.417615	0.52	9:802228:A:T	3	1.804e-18	1.804e-18	-0.0037	-0.0037	0.3858	0
rs114680331	9	815682	T	C	yes	0.12 (rs7027685)	0.900182	0.950577	35.3112	2.8e-09	-0.00429937	0.000720808	35.5771	2.5e-09	0.79314	-0.0033541	0.00223344	2.25529	0.13	0.80572	-0.00691839	0.00684871	1.02045	0.31	9:815682:T:C	3	5.376e-10	5.376e-10	-0.0042	-0.0042	0.8534	0
rs4742448	9	826585	C	G	yes	0.28 (rs7027685)	0.541753	0.954467	34.1167	5.2e-09	-0.00251208	0.000432644	33.7137	6.4e-09	0.460183	-0.00245113	0.00179652	1.86152	0.17	0.477879	0.00307096	0.0054232	0.320655	0.57	9:826585:C:G	3	3.575e-09	3.575e-09	-0.0025	-0.0025	0.5906	0
rs2277163	9	827224	A	G	yes	0.07 (rs7027685)	0.0529084	0.978789	33.8858	5.8e-09	0.005483	0.000951432	33.2109	8.3e-09	0.0350915	-0.00283124	0.00489981	0.333885	0.56	0.034987	0.0219465	0.0145919	2.26206	0.13	9:827224:A:G	3	1.783e-08	0.3156	0.0052	0.0039	0.1294	51.09
rs1265164	10	105674854	A	G	yes	NA	0.130804	0.997562	33.0204	9.1e-09	0.0035879	0.000626741	32.772	1e-08	0.118659	0.00127286	0.0027967	0.207144	0.65	0.114032	-0.00664086	0.00835468	0.631814	0.43	10:105674854:A:G	3	1.995e-08	0.0001178	0.0034	0.0033	0.348	5.27
rs11246003	11	213723	T	G	yes	0.00 (rs507139)	0.955576	0.997999	31.6912	1.8e-08	0.00583195	0.00102557	32.3367	1.3e-08	0.978415	0.00741937	0.00619574	1.43399	0.23	0.985006	-0.0203098	0.0219742	0.854245	0.36	11:213723:T:G	3	8.557e-09	8.557e-09	0.0058	0.0058	0.4769	0
rs507139	11	225196	G	A	yes	NA	0.92558	0.984107	53.4899	2.6e-13	0.00590577	0.000810591	53.0823	3.2e-13	0.91064	0.00573513	0.00316568	3.28211	0.07	0.909385	-0.00201351	0.00930034	0.0468718	0.83	11:225196:G:A	3	8.483e-14	8.483e-14	0.0058	0.0058	0.6974	0
rs2207548	11	32368744	C	A	yes	0.24 (rs10835889)	0.576511	0.983953	61.5624	4.3e-15	-0.00339605	0.000430052	62.36	2.9e-15	0.665915	-0.00268468	0.00192386	1.94733	0.16	0.654757	0.000282578	0.00560984	0.00253732	0.96	11:32368744:C:A	3	1.405e-15	1.405e-15	-0.0033	-0.0033	0.7596	0
rs10835889	11	32370380	G	A	yes	NA	0.841048	0.982329	79.5365	4.7e-19	-0.00516992	0.000580801	79.2341	5.5e-19	0.926677	-0.001383	0.00346653	0.159168	0.69	0.923732	-0.0244296	0.0102108	5.72423	0.017	11:32370380:G:A	3	3.102e-19	0.07557	-0.0051	-0.0054	0.0932	57.86
rs7120483	11	32406983	G	C	yes	0.30 (rs10835889)	0.879824	0.989997	44.1617	3e-11	-0.00434169	0.000650987	44.4807	2.6e-11	0.925762	-0.0049778	0.00345484	2.07596	0.15	0.911699	-0.0161136	0.00951458	2.86817	0.09	11:32406983:G:C	3	4.545e-12	4.545e-12	-0.0044	-0.0044	0.4605	0
rs11031783	11	32459923	C	A	yes	0.28 (rs10835889)	0.796331	0.993865	37.15	1.1e-09	-0.00317873	0.000524803	36.6872	1.4e-09	0.79311	-0.00288871	0.00223311	1.67335	0.2	0.789337	0.00415443	0.00659117	0.397282	0.53	11:32459923:C:A	3	9.064e-10	9.064e-10	-0.0031	-0.0031	0.5376	0
rs2553772	11	35085453	T	G	yes	NA	0.461813	0.995341	34.3154	4.7e-09	-0.0024878	0.000423809	34.4579	4.4e-09	0.472652	-0.00232489	0.00181662	1.63787	0.2	0.473066	-0.00164454	0.00537295	0.0936837	0.76	11:35085453:T:G	3	1.82e-09	1.82e-09	-0.0025	-0.0025	0.9843	0
rs59021565	11	107999907	C	G	yes	0.27 (rs141379009)	0.908654	0.98241	31.4176	2.1e-08	-0.00410273	0.00073828	30.8819	2.7e-08	0.951433	0.00255057	0.0042136	0.36641	0.54	0.954091	0.0152205	0.0129433	1.38283	0.24	11:107999907:C:G	3	1.191e-07	0.8826	-0.0038	-0.0005	0.1005	56.48
rs141379009	11	108149207	T	G	yes	NA	0.972885	0.999367	77.1287	1.6e-18	-0.0113839	0.00129969	76.719	2e-18	0.992226	0.0074739	0.0103419	0.522269	0.47	0.993613	-0.0163096	0.0337975	0.23287	0.63	11:108149207:T:G	3	7.142e-18	0.3358	-0.0111	-0.0065	0.1923	39.34
rs4988023	11	108168995	A	C	yes	0.00 (rs141379009)	0.855739	0.998256	42.8475	5.9e-11	0.0039725	0.000600935	43.6991	3.8e-11	0.758262	0.00279044	0.00212221	1.72889	0.19	0.764161	-0.00755736	0.00632958	1.42558	0.23	11:108168995:A:C	3	4.635e-11	0.05309	0.0038	0.003	0.1714	43.31
rs12223381	11	108354102	C	T	yes	0.12 (rs59021565)	0.594433	0.992523	30.3032	3.7e-08	-0.00237165	0.000431322	30.2341	3.8e-08	0.614024	-0.00174297	0.00186793	0.870683	0.35	0.632358	-0.0114428	0.00557504	4.21279	0.04	11:108354102:C:T	3	1.156e-08	0.01437	-0.0024	-0.0025	0.2518	27.5
rs9669403	12	46798900	G	A	yes	0.28 (rs12832777)	0.597681	0.980037	36.8404	1.3e-09	-0.002643	0.000434519	36.9979	1.2e-09	0.598933	0.000947282	0.00184616	0.263282	0.61	0.596723	-0.00259761	0.00542717	0.229088	0.63	12:46798900:G:A	3	5.784e-09	0.238	-0.0025	-0.0016	0.1666	44.2
rs12832777	12	46831129	T	C	yes	NA	0.298767	0.999678	44.4802	2.6e-11	-0.0030827	0.000460908	44.7336	2.3e-11	0.339939	-0.000918874	0.00189435	0.235284	0.63	0.330341	-3.51786e-05	0.00568209	3.83301e-05	1	12:46831129:T:C	3	4.297e-11	4.297e-11	-0.0029	-0.0029	0.4734	0
rs117245733	13	40723944	G	A	yes	0.00 (rs7986407)	0.983621	0.907964	34.7732	3.7e-09	-0.0102115	0.00173806	34.5185	4.2e-09	0.969878	-0.0237702	0.00532723	19.9097	8.1e-06	0.976305	-0.0378347	0.0177921	4.52196	0.033	13:40723944:G:A	3	9.593e-13	0.005573	-0.0117	-0.0186	0.0181	75.08
rs7986407	13	41179798	A	G	yes	NA	0.690035	0.99931	46.6922	8.3e-12	-0.00309001	0.000455879	45.9431	1.2e-11	0.64436	0.000848465	0.0018955	0.200363	0.65	0.649111	-0.010143	0.00556127	3.32646	0.068	13:41179798:A:G	3	3.845e-11	0.2154	-0.0029	-0.0024	0.0556	65.39
rs66998222	16	51481596	G	A	yes	NA	0.798722	0.993765	42.8336	6e-11	0.00342548	0.000528228	42.0534	8.9e-11	0.84628	0.00782403	0.00250445	9.75967	0.0018	0.843669	-0.00305738	0.0073807	0.171594	0.68	16:51481596:G:A	3	3.812e-12	0.01885	0.0036	0.0044	0.1521	46.89
rs78378222	17	7571752	T	G	yes	NA	0.987391	0.954826	104.29	1.7e-24	-0.0198374	0.00193173	105.457	9.7e-25	0.983049	-0.0126741	0.00697967	3.29734	0.069	0.982692	-0.0439129	0.0204276	4.62115	0.032	17:7571752:T:G	3	6.035e-26	4.789e-09	-0.0195	-0.0191	0.299	17.18
rs733381	22	40669648	A	G	yes	NA	0.787377	0.998452	43.3721	4.5e-11	-0.00337752	0.000515553	42.919	5.7e-11	0.751707	-0.00377267	0.00209671	3.23758	0.072	0.758053	-0.0132159	0.00620266	4.53981	0.033	22:40669648:A:G	3	3.899e-12	0.0003039	-0.0035	-0.0037	0.2834	20.69
rs5936989	X	70022420	T	A	yes	0.27 (rs5937008)	0.217636	0.994491	32.8917	9.7e-09	0.0053098	0.000929891	32.6056	1.1e-08	0.31258	0.00697589	0.00333393	4.37809	0.036	0.307942	0.00252625	0.00480875	0.275986	0.6	X:70022420:T:A	3	1.365e-09	1.365e-09	0.0054	0.0054	0.8549	0
rs5937008	X	70093038	C	T	yes	NA	0.479813	1	64.2615	1.1e-15	0.00621929	0.000768049	65.5698	5.6e-16	0.505504	0.00533856	0.00313172	2.90591	0.088	0.506479	0.00287387	0.00442388	0.422013	0.52	X:70093038:C:T	3	1.079e-16	1.079e-16	0.0062	0.0062	0.9631	0
rs7059898	X	70149078	C	A	yes	0.27 (rs5937008)	0.640689	0.955657	32.0856	1.5e-08	-0.00457074	0.000811098	31.756	1.7e-08	0.656958	-0.00861527	0.00327598	6.91602	0.0085	0.663273	-0.00755733	0.00467063	2.6181	0.11	X:70149078:C:A	3	4.377e-10	0.008729	-0.0049	-0.0068	0.1356	49.95
rs7888560	X	131171122	A	G	yes	0.19 (rs5930554)	0.771576	0.993882	31.4317	2.1e-08	-0.00516588	0.000915637	31.8304	1.7e-08	0.785539	-0.00251519	0.00378636	0.441265	0.51	0.770178	-0.00628754	0.00519351	1.46568	0.23	X:131171122:A:G	3	7.595e-09	0.02375	-0.0051	-0.0052	0.2288	32.21
rs5930554	X	131312089	T	C	yes	NA	0.68942	0.994802	107.51	3.4e-25	-0.0085794	0.000829109	107.076	4.3e-25	0.696291	-0.000601855	0.00338859	0.0315462	0.86	0.681692	-0.00630867	0.00471195	1.79256	0.18	X:131312089:T:C	3	1.842e-24	0.0655	-0.0082	-0.0067	0.0403	68.87
rs5933158	X	131578034	A	G	yes	0.21 (rs5930554)	0.414247	0.925879	39.7663	2.9e-10	-0.00497522	0.000798385	38.8329	4.6e-10	0.359662	-0.0027778	0.00325616	0.727765	0.39	0.375509	-0.00497951	0.00456188	1.19148	0.28	X:131578034:A:G	3	2.553e-10	2.553e-10	-0.0049	-0.0049	0.6454	0
rs5975338	X	131626317	A	G	yes	0.28 (rs5930554)	0.870696	0.986864	32.0656	1.5e-08	-0.00649623	0.00114479	32.2008	1.4e-08	0.846035	0.00289353	0.00431638	0.449382	0.5	0.859774	-0.00581579	0.0063274	0.844824	0.36	X:131626317:A:G	3	5.997e-08	0.3275	-0.006	-0.0044	0.0552	65.47
rs17631680	2	67090367	T	C	yes (stage 2)	NA	0.900271	0.979538	26.8381	2.2e-07	0.004	0.0007	26.8997	2.1e-07	0.896037	0.005	0.0029	3.47129	0.062	0.902073	0.00714769	0.00895289	0.63739	0.42	2:67090367:T:C	3	3.318e-08	3.318e-08	0.0038	0.0038	0.7803	0
rs1735537	3	128122820	T	C	yes (stage 2)	NA	0.754586	0.987309	27.5829	1.5e-07	-0.003	0.0005	27.9804	1.2e-07	0.752774	-0.004	0.0021	2.92318	0.087	0.745187	0.00151576	0.00613403	0.061062	0.8	3:128122820:T:C	3	3.702e-08	3.702e-08	-0.0026	-0.0026	0.7172	0
rs67751869	4	54568834	T	C	yes (stage 2)	0.14 (rs62323680)	0.940085	0.977459	28.4719	9.5e-08	-0.005	0.0009	28.3914	9.9e-08	0.941951	-0.011	0.0039	8.38835	0.0037	0.944928	-0.0169789	0.0118156	2.06493	0.15	4:54568834:T:C	3	2.925e-09	0.009055	-0.0052	-0.0074	0.1644	44.62
rs6901631	6	152567047	T	C	yes (stage 2)	0.26 (rs6904757)	0.865525	0.988513	29.5736	5.4e-08	0.003	0.0006	29.541	5.4e-08	0.906646	0.005	0.0031	2.41056	0.12	0.898834	0.0129264	0.00885825	2.12943	0.14	6:152567047:T:C	3	1.062e-08	1.062e-08	0.0035	0.0035	0.5076	0
rs11790408	9	876418	G	T	yes (stage 2)	0.10 (rs4742448)	0.582831	0.994034	29.1769	6.6e-08	0.002	0.0004	29.192	6.5e-08	0.636646	0.002	0.0019	0.711937	0.39	0.612736	-0.00343031	0.00553634	0.383904	0.54	9:876418:G:T	3	6.929e-08	6.929e-08	0.0023	0.0023	0.5479	0
rs10415391	19	22652436	C	T	yes (stage 2)	NA	0.903394	1	26.7717	2.3e-07	-0.004	0.0007	26.3661	2.8e-07	0.879268	-0.006	0.0028	5.3573	0.02	0.881248	0.00424639	0.00821162	0.267413	0.61	19:22652436:C:T	3	4.108e-08	4.108e-08	-0.0038	-0.0038	0.388	0
rs62132801	19	49267882	A	T	yes (stage 2)	NA	0.904482	0.950162	26.8683	2.2e-07	0.004	0.0007	26.0456	3.3e-07	0.893933	0.006	0.0029	4.80041	0.028	0.873936	0.0048807	0.00808541	0.364385	0.55	19:49267882:A:T	3	3.505e-08	3.505e-08	0.0039	0.0039	0.6687	0
