# Supplementary material for: Genetic predisposition to uterine leiomyoma is determined by loci for genitourinary development and genome stability
Source: eLife. 2018 Sep 18;7:e37110. doi: 10.7554/eLife.37110 (PMC6203434; doi:10.7554/eLife.37110)
Supplement: Supplementary file 3. — For each of the 57 GRS SNPs, we report the allele frequency, association effect size and P-value, together with the heterogeneity estimates Cochrane's Q-value and I2 index. [file elife-37110-supp3.xlsx]

## Sheet: DESCRIPTION
	Column	Description
	SNP	rs-code (from UKBB imputed genotypes; March 2018)
	CHR	Chromosome
	BP	Position (hg19)
	A	Allele A (follows the allele order in the UKBB data)
	B	Allele B
African	A FREQ	Allele A frequency
	BETA	Beta
	SE	Standard error of beta
	P	Association based the BOLT-LMM-inf
Black Caribbean	A FREQ	Allele A frequency
	BETA	Beta
	SE	Standard error of beta
	P	Association based the BOLT-LMM-inf
Indian	A FREQ	Allele A frequency
	BETA	Beta
	SE	Standard error of beta
	P	Association based the BOLT-LMM-inf
Irish	A FREQ	Allele A frequency
	BETA	Beta
	SE	Standard error of beta
	P	Association based the BOLT-LMM-inf
Other white background	A FREQ	Allele A frequency
	BETA	Beta
	SE	Standard error of beta
	P	Association based the BOLT-LMM-inf
Meta analysis	N (cohorts)	Number of cohorts
	P	Fixed-effects meta-analysis p-value
	P(R)	Random-effects meta-analysis p-value
	BETA	Fixed-effects estimate
	BETA(R)	Random-effects estimate
	Cochrane-Q	p-value for Cochrane's Q statistic
	I^2 heterogeneity index	I^2 heterogeneity index (0-100)

## Sheet: DATA
					African				Black Caribbean				Indian				Irish				Other white background				Meta analysis
SNP	CHR	BP	A	B	A FREQ	BETA	SE	P	A FREQ	BETA	SE	P	A FREQ	BETA	SE	P	A FREQ	BETA	SE	P	A FREQ	BETA	SE	P	N (cohorts)	P	P(R)	BETA	BETA(R)	Cochrane-Q	I^2 heterogeneity index
rs2235529	1	22450487	C	T	0.988424	0.0869874	0.0740863	0.24	0.973272	-0.00990672	0.0381122	0.79	0.750719	-0.00408502	0.00817819	0.62	0.847264	-0.000918226	0.0058003	0.87	0.852671	-0.0192712	0.00509802	0.00016	5	0.004629	0.1827	-0.0098	-0.0081	0.0919	49.95
rs2092315	1	22507684	C	T	0.873286	0.00350606	0.0212607	0.87	0.863976	0.0140951	0.0167536	0.4	0.694244	-0.00511563	0.00770153	0.51	0.736325	0.00371281	0.00469125	0.43	0.760574	-0.00278605	0.00425052	0.51	5	0.9687	0.9687	-0.0001	-0.0001	0.6934	0
rs10929757	2	11702661	A	C	0.961132	0.044674	0.0378495	0.24	0.895587	0.0290681	0.0193658	0.13	0.40997	-0.0194893	0.0073819	0.0083	0.417085	0.000315074	0.00423445	0.94	0.443744	-0.00955283	0.00371559	0.01	5	0.01709	0.4038	-0.0062	-0.0048	0.0211	65.35
rs11674184	2	11721535	T	G	0.761435	0.00336763	0.0172056	0.84	0.73744	-0.00792536	0.0136154	0.56	0.613118	0.0163671	0.00741442	0.027	0.620029	0.00382166	0.00425761	0.37	0.598813	0.00217654	0.00374568	0.56	5	0.1064	0.1064	0.0041	0.0041	0.4356	0
rs10936600	3	169514585	A	T	0.953562	-0.0415389	0.0338185	0.22	0.931044	0.0267636	0.0230353	0.25	0.742329	0.0132562	0.00801912	0.098	0.754904	0.013636	0.00479078	0.0044	0.764578	0.00953157	0.00426422	0.025	5	9.024e-05	9.024e-05	0.0115	0.0115	0.4997	0
rs143835293	3	197623337	A	G	0.999821	0.490277	0.979209	0.62	0.999924	NA	NA	1	0.99961	-1.52851	0.370971	3.8e-05	0.998018	0.0414711	0.0596889	0.49	0.99735	0.0354267	0.0427804	0.41	4	0.4803	0.3933	0.0244	-0.1153	0.0005	83.24
rs62323680	4	54546192	G	A	0.988997	0.018704	0.0717675	0.79	0.981504	0.0262386	0.0447996	0.56	0.945853	-0.00688561	0.0157753	0.66	0.943193	-0.00888427	0.00903249	0.33	0.925068	-0.00580823	0.00693146	0.4	5	0.2155	0.2155	-0.0064	-0.0064	0.9467	0
rs2202282	4	70634441	C	T	0.807652	-0.0138022	0.0183756	0.45	0.782733	0.0227504	0.0145212	0.12	0.390797	0.00496582	0.0073725	0.5	0.484348	0.00788987	0.00411099	0.055	0.524097	-0.00110194	0.00361498	0.76	5	0.1787	0.2483	0.0033	0.0038	0.245	26.48
rs72709458	5	1283755	C	T	0.837473	-0.00737996	0.0196248	0.71	0.855024	-0.00241538	0.0171394	0.89	0.759961	-0.00655527	0.00847809	0.44	0.797511	-0.00184096	0.00522446	0.72	0.783824	-0.00746922	0.0044392	0.092	5	0.08452	0.08452	-0.0053	-0.0053	0.9465	0
rs2736100	5	1286516	C	A	0.463918	0.0068277	0.0142884	0.63	0.450904	-0.00456101	0.0118599	0.7	0.603249	0.0119681	0.00718636	0.096	0.472222	0.000592714	0.00411021	0.89	0.507737	0.0054736	0.00358681	0.13	5	0.09103	0.09103	0.0041	0.0041	0.6192	0
rs2853676	5	1288547	T	C	0.246456	-0.00308905	0.0163714	0.85	0.225729	-0.0137683	0.0141859	0.33	0.353249	0.0103351	0.00736536	0.16	0.257417	0.00323556	0.00480271	0.5	0.284297	0.00218808	0.0039731	0.58	5	0.2871	0.2871	0.0029	0.0029	0.6321	0
rs2456181	5	176450837	C	G	0.133914	0.0307871	0.0212438	0.15	0.184681	0.00101679	0.0154782	0.95	0.519046	0.00549738	0.00710951	0.44	0.534023	0.00257815	0.00416959	0.54	0.499445	-0.000140613	0.00362799	0.97	5	0.4249	0.4249	0.002	0.002	0.6537	0
rs4870084	6	152543949	C	T	0.926035	0.0641036	0.0295055	0.03	0.91266	0.0429748	0.0223833	0.055	0.810726	0.00978426	0.00928241	0.29	0.813811	0.00721596	0.00535966	0.18	0.804492	0.0142527	0.00462036	0.002	5	0.0001238	0.004753	0.0124	0.0134	0.1909	34.56
rs6928363	6	152546094	G	A	0.279499	0.0351974	0.016084	0.029	0.301485	0.0102897	0.0132999	0.44	0.37186	0.0124038	0.00741663	0.094	0.503808	0.00277343	0.00419447	0.51	0.513534	0.00664373	0.00363621	0.068	5	0.006972	0.01424	0.0067	0.0072	0.3218	14.53
rs58415480	6	152562271	C	G	0.758556	-0.0602418	0.0168976	0.00036	0.769191	-0.0163995	0.0141596	0.25	0.94958	-0.00297314	0.0166258	0.86	0.841135	-0.00185056	0.00573239	0.75	0.849329	-0.00460937	0.0051033	0.37	5	0.05916	0.09362	-0.0066	-0.0122	0.022	65.04
rs75510204	6	152592680	T	G	0.99963	NA	NA	1	0.99786	0.0493827	0.142729	0.73	0.995651	0.0414307	0.0646544	0.52	0.992726	-0.0286596	0.0265567	0.28	0.991101	0.00702114	0.02104	0.74	4	0.8434	0.8434	-0.0031	-0.0031	0.6221	0
rs6904757	6	152593102	A	G	0.561681	0.0275415	0.0148001	0.063	0.56874	-0.0115613	0.0121373	0.34	0.597986	0.00902216	0.0073569	0.22	0.642918	0.0135354	0.0043407	0.0018	0.613723	0.00128345	0.00373991	0.73	5	0.009154	0.1131	0.0066	0.0071	0.0631	55.17
rs144444583	6	152684585	T	C	0.934558	-0.0285304	0.0298701	0.34	0.937984	-0.00527118	0.0248647	0.83	0.955257	-0.0150617	0.0179886	0.4	0.880767	0.000855491	0.00635062	0.89	0.874449	-0.00382404	0.00546791	0.48	5	0.444	0.444	-0.003	-0.003	0.8124	0
rs138821078	9	674217	C	G	0.99838	-0.106463	0.216566	0.62	0.996623	-0.0382515	0.116497	0.74	0.991981	-0.0210457	0.0446315	0.64	0.979788	-0.0236112	0.0149441	0.11	0.981235	-0.0196136	0.0136473	0.15	5	0.02654	0.02654	-0.0217	-0.0217	0.9947	0
rs10975820	9	684160	G	A	0.257062	-0.00169542	0.016523	0.92	0.314863	-0.0257402	0.0129862	0.047	0.746696	-0.0112357	0.00831604	0.18	0.86763	-0.0117566	0.00614953	0.056	0.822382	-0.00969943	0.00472404	0.04	5	0.0005489	0.0005489	-0.0112	-0.0112	0.7919	0
rs7027685	9	802228	A	T	0.451493	-0.0244745	0.01524	0.11	0.444114	-0.0140306	0.0124366	0.26	0.553178	-0.00574276	0.00714223	0.42	0.618772	-0.0127286	0.00429867	0.0031	0.604292	0.000101762	0.00370998	0.98	5	0.0125	0.04936	-0.0063	-0.0077	0.1344	43.09
rs114680331	9	815682	T	C	0.940907	-0.0736001	0.0325493	0.024	0.931057	-0.0156431	0.0249991	0.53	0.906697	0.00420979	0.0128622	0.74	0.904186	-0.0173884	0.00717293	0.015	0.900988	-0.00619941	0.00627884	0.32	5	0.0146	0.08522	-0.0106	-0.0113	0.1648	38.46
rs4742448	9	826585	C	G	0.106403	-0.0657885	0.0253947	0.0096	0.153518	-0.0463161	0.0177506	0.0091	0.504684	-0.00600127	0.00736094	0.41	0.551513	-0.0135761	0.00430195	0.0016	0.532826	-0.00138483	0.00372699	0.71	5	0.002011	0.02997	-0.008	-0.0138	0.0053	72.87
rs2277163	9	827224	A	G	0.0367837	0.0212484	0.0384711	0.58	0.0515341	-0.0134076	0.0270795	0.62	0.0674602	-0.0163995	0.0145104	0.26	0.0522184	0.0115887	0.00939818	0.22	0.0492603	-0.0141626	0.00846724	0.094	5	0.408	0.5192	-0.0046	-0.0047	0.2432	26.75
rs1265164	10	105674854	A	G	0.593362	0.0374853	0.0141719	0.0082	0.549228	0.0174506	0.0118978	0.14	0.0868762	0.0222518	0.0127215	0.08	0.122154	0.0073516	0.0063554	0.25	0.148499	0.0114207	0.00508134	0.025	5	0.0001773	0.0004942	0.0131	0.0137	0.3379	11.88
rs11246003	11	213723	T	G	0.928759	0.00965227	0.0277355	0.73	0.931823	0.0178022	0.0232617	0.44	0.891547	-0.000266325	0.0113038	0.98	0.955159	0.0118478	0.00995234	0.23	0.963187	0.00459861	0.00958641	0.63	5	0.2334	0.2334	0.0067	0.0067	0.9196	0
rs507139	11	225196	G	A	0.96849	-0.0171915	0.0428393	0.69	0.967204	-0.012833	0.0356873	0.72	0.965882	0.0199163	0.019828	0.32	0.911601	0.00580126	0.00737713	0.43	0.924989	0.00129122	0.00691452	0.85	5	0.4276	0.4276	0.0038	0.0038	0.8574	0
rs2207548	11	32368744	C	A	0.403369	-0.00647522	0.0150276	0.67	0.443406	-0.00904236	0.0123876	0.47	0.6554	0.00228945	0.00767009	0.77	0.559826	0.00068195	0.00422055	0.87	0.600299	-0.00352681	0.00372807	0.34	5	0.5037	0.5037	-0.0017	-0.0017	0.8645	0
rs10835889	11	32370380	G	A	0.576073	-0.0255436	0.015345	0.096	0.597188	-0.0178497	0.0125169	0.15	0.769698	-0.00492332	0.00862584	0.57	0.835331	-0.0021362	0.00564806	0.71	0.840577	-0.00404913	0.00495898	0.41	5	0.0933	0.0933	-0.0054	-0.0054	0.5373	0
rs7120483	11	32406983	G	C	0.733672	-0.000766667	0.0162103	0.96	0.758788	-0.016952	0.0142884	0.24	0.86772	0.00392573	0.0105018	0.71	0.886105	0.00128075	0.00654912	0.84	0.872691	-0.00548414	0.00541099	0.31	5	0.4487	0.4487	-0.0028	-0.0028	0.7282	0
rs11031783	11	32459923	C	A	0.730925	-0.00631859	0.0164927	0.7	0.737905	-0.013353	0.0133757	0.32	0.496244	-0.000121833	0.00713052	0.99	0.801843	-0.00437109	0.00521781	0.4	0.78807	-0.00402116	0.00439749	0.36	5	0.1712	0.1712	-0.004	-0.004	0.9372	0
rs2553772	11	35085453	T	G	0.717359	-0.00832909	0.0159656	0.6	0.655336	0.000224645	0.0125425	0.99	0.350883	0.00657894	0.00737924	0.37	0.472813	-0.00214838	0.00415923	0.61	0.443706	-0.00432866	0.00367964	0.24	5	0.3762	0.3762	-0.0022	-0.0022	0.7477	0
rs59021565	11	107999907	C	G	0.973849	-0.041363	0.047294	0.38	0.963543	-0.023595	0.0317272	0.46	0.969039	-0.015524	0.0210798	0.46	0.911248	-0.00157233	0.00735372	0.83	0.910181	0.000525406	0.00638686	0.93	5	0.6667	0.6667	-0.002	-0.002	0.7857	0
rs141379009	11	108149207	T	G	0.999356	0.167528	0.28796	0.56	0.997601	0.0809282	0.120499	0.5	0.994215	-0.0254566	0.0466949	0.59	0.982101	-0.00144799	0.0154519	0.93	0.977047	-0.0103502	0.0121125	0.39	5	0.4526	0.4526	-0.007	-0.007	0.8679	0
rs4988023	11	108168995	A	C	0.995524	-0.0918113	0.10782	0.39	0.981138	0.0808762	0.042805	0.059	0.92286	0.0222559	0.0132202	0.092	0.861887	0.00859724	0.00603699	0.15	0.85699	0.00722262	0.0051324	0.16	5	0.01191	0.03084	0.0094	0.0102	0.3071	16.89
rs12223381	11	108354102	C	T	0.580041	-0.0216281	0.0145866	0.14	0.596844	0.00495043	0.0119829	0.68	0.432039	-0.00245883	0.00716182	0.73	0.610561	-0.00241724	0.00427594	0.57	0.56265	0.00214467	0.00362713	0.55	5	0.834	0.834	-0.0005	-0.0005	0.5392	0
rs9669403	12	46798900	G	A	0.370451	-0.0165624	0.01484	0.26	0.37967	0.00245397	0.0122022	0.84	0.633721	0.00177092	0.00750155	0.81	0.59318	0.000547981	0.00425862	0.9	0.610384	-0.00625585	0.00370624	0.091	5	0.2534	0.2534	-0.0029	-0.0029	0.5742	0
rs12832777	12	46831129	T	C	0.0620414	-0.0156235	0.0291619	0.59	0.0716493	-0.00853502	0.0232908	0.71	0.194887	0.00269811	0.00885542	0.76	0.31108	-0.006593	0.00446544	0.14	0.314066	-0.0118436	0.00387255	0.0022	5	0.002099	0.002099	-0.0084	-0.0084	0.6293	0
rs117245733	13	40723944	G	A	0.998997	0.926264	0.739249	0.21	0.99759	0.182104	0.138733	0.19	0.992107	0.00928338	0.0485179	0.85	0.981618	-0.0192379	0.0159495	0.23	0.983247	-0.011421	0.014968	0.45	5	0.2365	0.2365	-0.0126	-0.0126	0.4107	0
rs7986407	13	41179798	A	G	0.546986	0.00545054	0.0144815	0.71	0.551963	0.00649652	0.0120361	0.59	0.524021	0.000609794	0.00708697	0.93	0.699594	-0.00828414	0.00448303	0.065	0.686499	0.00189261	0.00390178	0.63	5	0.5931	0.5931	-0.0014	-0.0014	0.4331	0
rs66998222	16	51481596	G	A	0.981632	0.00334072	0.0571496	0.95	0.972495	-0.0132717	0.0370233	0.72	0.904397	0.0221861	0.0119093	0.062	0.825541	-0.00420082	0.00552094	0.45	0.775455	0.00127	0.00434541	0.77	5	0.801	0.7861	0.0008	0.001	0.3792	4.84
rs78378222	17	7571752	T	G	0.998889	-0.322414	0.304013	0.29	0.996995	-0.0826769	0.116722	0.48	0.997725	-0.0133593	0.103074	0.9	0.991016	-0.0312851	0.0228955	0.17	0.988792	-0.0403726	0.0176397	0.022	5	0.005948	0.005948	-0.0378	-0.0378	0.8809	0
rs733381	22	40669648	A	G	0.924116	0.0229836	0.0272394	0.4	0.911685	-0.0235915	0.0209282	0.26	0.699175	-0.00615039	0.00771896	0.43	0.803962	-0.00877508	0.00524652	0.094	0.798272	-0.0109825	0.00446914	0.014	5	0.002336	0.002336	-0.0093	-0.0093	0.701	0
rs5936989	X	70022420	T	A	0.227087	0.0262556	0.0170174	0.12	0.23633	0.00574278	0.0140831	0.68	0.146098	-0.00682031	0.0100104	0.5	0.226405	0.00693973	0.0049507	0.16	0.213126	0.00783701	0.00439896	0.075	5	0.02637	0.02637	0.0067	0.0067	0.522	0
rs5937008	X	70093038	C	T	0.878544	0.0234017	0.0218048	0.28	0.869878	-0.0178193	0.0176985	0.31	0.56426	0.00448749	0.00716793	0.53	0.480472	0.000807589	0.00410172	0.84	0.508204	0.00353518	0.00359093	0.32	5	0.3177	0.3177	0.0025	0.0025	0.6327	0
rs7059898	X	70149078	C	A	0.869557	-0.0623789	0.0225775	0.0057	0.87771	0.00136909	0.0186771	0.94	0.886691	0.00149133	0.0115255	0.9	0.637007	-0.00433764	0.00433709	0.32	0.643265	-0.0109937	0.00385008	0.0043	5	0.003074	0.09938	-0.0081	-0.0084	0.0899	50.29
rs7888560	X	131171122	A	G	0.874157	-0.0130593	0.0222517	0.56	0.859609	-0.0222812	0.0171697	0.19	0.882623	-0.00687168	0.0111591	0.54	0.789448	-0.00362633	0.00508003	0.48	0.776748	0.00041269	0.00431148	0.92	5	0.3975	0.3975	-0.0026	-0.0026	0.6971	0
rs5930554	X	131312089	T	C	0.212091	-0.0301794	0.0175229	0.085	0.219251	-0.034843	0.0138652	0.012	0.801639	-0.015625	0.00885909	0.078	0.674196	-0.00613453	0.00443374	0.17	0.696181	-0.0114942	0.00392964	0.0034	5	3.328e-05	0.0007605	-0.0112	-0.0125	0.2276	29.09
rs5933158	X	131578034	A	G	0.0747258	-0.0436877	0.0296664	0.14	0.0848653	0.00524449	0.0227418	0.82	0.437807	-0.00400041	0.00740566	0.59	0.406206	-0.00686199	0.00431192	0.11	0.434504	-0.00526669	0.00375052	0.16	5	0.02518	0.02518	-0.0059	-0.0059	0.7346	0
rs5975338	X	131626317	A	G	0.559896	-0.00122513	0.0149472	0.93	0.577384	-0.0180536	0.0127662	0.16	0.867723	0.00460985	0.0105453	0.66	0.855402	-0.00590504	0.00583553	0.31	0.867347	-0.00620436	0.00536342	0.25	5	0.1089	0.1089	-0.0055	-0.0055	0.7376	0
rs17631680	2	67090367	T	C	0.990833	-0.0432737	0.0926793	0.64	0.981356	-0.0420088	0.0481028	0.38	0.967525	0.0125659	0.0220149	0.57	0.909459	0.00769387	0.00730645	0.29	0.902766	-0.00099887	0.00615594	0.87	5	0.5813	0.5813	0.0025	0.0025	0.7105	0
rs1735537	3	128122820	T	C	0.448416	-0.0249433	0.0149106	0.094	0.450476	-0.0121349	0.0118967	0.31	0.618522	-2.96086e-05	0.0073722	1	0.756403	0.00276089	0.00483427	0.57	0.750734	-0.00531984	0.00416556	0.2	5	0.2839	0.3184	-0.003	-0.0032	0.3254	13.94
rs67751869	4	54568834	T	C	0.904892	0.0477478	0.0252526	0.059	0.921158	-0.0146761	0.0223152	0.51	0.954093	-0.0393685	0.017904	0.028	0.951811	-0.00802589	0.0097937	0.41	0.93712	0.00114382	0.00752277	0.88	5	0.4501	0.5797	-0.004	-0.0053	0.0619	55.39
rs6901631	6	152567047	T	C	0.731699	0.0194202	0.0166209	0.24	0.755686	0.014686	0.0142453	0.3	0.820694	0.0115053	0.00937915	0.22	0.8607	0.00923313	0.00600686	0.12	0.855712	0.00830868	0.00517437	0.11	5	0.003972	0.003972	0.0099	0.0099	0.9656	0
rs11790408	9	876418	G	T	0.950787	0.0291002	0.0348061	0.4	0.912237	0.0411176	0.0212843	0.053	0.688881	-0.00123651	0.00757988	0.87	0.558841	0.00570372	0.00419724	0.17	0.607659	0.00178903	0.00370747	0.63	5	0.1576	0.202	0.0036	0.0038	0.3378	11.9
rs10415391	19	22652436	C	T	0.780606	-0.0143174	0.0171364	0.4	0.785161	-0.0224293	0.014212	0.11	0.763538	-0.00710431	0.00831052	0.39	0.891008	-0.00919717	0.00658917	0.16	0.88384	-0.00127383	0.0056628	0.82	5	0.06395	0.06395	-0.0067	-0.0067	0.647	0
rs62132801	19	49267882	A	T	0.982587	-0.121254	0.0699863	0.083	0.977627	0.0302538	0.0477023	0.53	0.914901	0.0142068	0.0139122	0.31	0.910459	-0.00960639	0.00735524	0.19	0.900678	-0.00621797	0.00616819	0.31	5	0.2147	0.4858	-0.0055	-0.0044	0.2286	28.94
