# Supplementary material for: Genetic predisposition to uterine leiomyoma is determined by loci for genitourinary development and genome stability
Source: eLife. 2018 Sep 18;7:e37110. doi: 10.7554/eLife.37110 (PMC6203434; doi:10.7554/eLife.37110)
Supplement: Supplementary file 4. — Tumors (T) and myometrium normal tissues (N) were analyzed separately. For each SNP, we report the local permutation test results from FastQTL (details in the Methods section). [file elife-37110-supp4.xlsx]

## Sheet: cis_permutation_pass_annotated_
Tissue	Gene	ID	N	best SNP	distance	nominal P	permutation P	FDR
T	RP11-816J6.3	ENSG00000269889.1	82	rs67795055	42457	9.10149e-05	0.000402837	0.223575
T	RUFY3	ENSG00000018189.8	8	rs7660770	-972945	0.000783988	0.000667715	0.369914
T	TRIP13	ENSG00000071539.9	22	rs2736099	394581	0.000162623	0.00227195	1
N	RN7SL832P	ENSG00000243819.3	28	rs7570979	886958	0.000406134	0.00274769	1
N	LNX1	ENSG00000072201.9	25	rs62323674	212300	0.000712478	0.00321757	1
N	RP11-849F2.8	ENSG00000269928.1	5	rs143094271	-665038	0.00243474	0.0039982	1
T	MIR5006	ENSG00000264190.1	158	rs9549254	-907660	0.000610074	0.00441841	1
N	RP11-423H2.3	ENSG00000249684.1	50	rs183686	-883235	0.00336209	0.00554669	1
N	SLC7A3	ENSG00000165349.7	148	rs4360450	965	0.000674648	0.0073836	1
T	ALPL	ENSG00000162551.9	52	0	521370	0.000847998	0.00758517	1
N	PRRG4	ENSG00000135378.3	167	rs11031737	-478718	0.000398626	0.00859487	1
N	RP11-791G15.2	ENSG00000272275.1	28	rs6432220	802714	0.00124401	0.00881395	1
T	ZDHHC11B	ENSG00000206077.6	22	rs2736099	576864	0.0009738	0.0102041	1
T	ACAP1	ENSG00000072818.7	5	rs78378222	331903	0.00482771	0.0104187	1
N	HNRNPA1P48	ENSG00000224578.3	20	rs55881068	-212266	0.00496921	0.0112061	1
T	WNT4	ENSG00000162552.10	52	rs12042083	28933	0.00129669	0.0115679	1
T	LRRIQ4	ENSG00000188306.6	82	rs13074500	25860	0.00295817	0.0119535	1
T	TEX11	ENSG00000120498.9	148	rs11795627	208650	0.00130291	0.0123272	1
T	AC011994.1	ENSG00000265583.1	28	rs11685032	-73236	0.00184276	0.0132332	1
T	FRMD7	ENSG00000165694.5	215	rs5933158	367012	0.000840257	0.0132614	1
N	TRAPPC1	ENSG00000170043.7	5	rs138420351	-133601	0.00723132	0.0143728	1
T	RP11-423H2.1	ENSG00000170089.11	72	rs353496	-806511	0.00936964	0.0150765	1
N	SDHAP3	ENSG00000185986.10	22	rs11742908	-297655	0.00142192	0.0158302	1
T	CDC42-IT1	ENSG00000230068.2	52	rs10917167	118400	0.00209838	0.0179909	1
N	RP11-362K14.6	ENSG00000270096.1	82	rs12638862	-35245	0.00449092	0.0195592	1
T	TNRC6B	ENSG00000100354.16	32	rs12484951	262253	0.00829392	0.0196858	1
N	DNAH2	ENSG00000183914.10	5	rs143094271	-157571	0.00972974	0.0198336	1
N	SALL1	ENSG00000103449.7	20	rs12933686	308913	0.00953451	0.0212915	1
T	XXyac-YRM2039.2	ENSG00000181404.13	71	rs138821078	659705	0.00168953	0.0222215	1
N	ITPRIP	ENSG00000148841.11	8	rs9419958	-395949	0.0142767	0.0238685	1
T	RNASEK-C17orf49	ENSG00000161939.14	5	0	501685	0.0118871	0.0243205	1
T	UQCRFS1P1	ENSG00000226085.2	32	rs1807579	256926	0.0106123	0.0244126	1
T	FOXO1	ENSG00000150907.6	166	rs9549260	124299	0.00294059	0.02609	1
T	NDUFS6	ENSG00000145494.7	22	rs7734992	-521387	0.00280823	0.0281651	1
T	RP11-259O2.3	ENSG00000249731.1	22	rs7710703	-680704	0.00289017	0.028447	1
T	CDC42	ENSG00000070831.11	52	rs41307810	-25076	0.00335113	0.0290544	1
T	RP3-363L9.1	ENSG00000227064.1	215	rs3764771	-830073	0.002027	0.0296991	1
T	RP11-362K14.7	ENSG00000270135.1	82	rs67795055	18611	0.00745473	0.0307047	1
N	AMIGO2	ENSG00000139211.5	155	rs9706162	-606808	0.00628394	0.0307984	1
T	LPIN1	ENSG00000134324.7	28	rs11685032	-143427	0.00506483	0.0332831	1
T	MBNL3	ENSG00000076770.10	215	rs1263155	190718	0.00254871	0.0337307	1
N	TOX3	ENSG00000103460.12	5	rs12325192	-983789	0.0323938	0.033765	1
N	DANCR	ENSG00000226950.2	23	rs62325482	885823	0.00823603	0.0353731	1
T	DMRT1	ENSG00000137090.7	71	rs12004436	-158261	0.00308928	0.0363877	1
N	NT5C2	ENSG00000076685.14	8	rs1265164	828913	0.0204956	0.037474	1
T	TMEM256-PLSCR3	ENSG00000187838.12	5	rs138420351	407016	0.0176795	0.038108	1
T	RP11-401P9.4	ENSG00000261685.2	20	rs12933686	799079	0.0163621	0.0384119	1
N	CTC1	ENSG00000178971.9	5	rs143094271	-667090	0.0188802	0.0403048	1
N	SULT1B1	ENSG00000173597.4	19	rs13133166	13318	0.0149351	0.040352	1
N	TNK1	ENSG00000174292.8	5	rs143094271	179248	0.0223646	0.0420683	1
T	SOX15	ENSG00000129194.3	5	rs138420351	208566	0.020216	0.043031	1
T	UGT2A1	ENSG00000173610.7	19	rs1587766	112959	0.0205983	0.0430515	1
T	RP4-607I7.1	ENSG00000255521.1	34	rs2553783	-82085	0.0265798	0.0441261	1
N	SENP3	ENSG00000161956.8	5	rs78378222	106559	0.0219358	0.0444655	1
N	KDM6B	ENSG00000132510.6	5	rs143094271	-280121	0.0216081	0.0454072	1
T	SKIL	ENSG00000136603.9	82	rs34194057	-525916	0.0113112	0.0463476	1
T	EPHB2	ENSG00000133216.12	52	0	-680104	0.00604411	0.0497436	1
T	NKD1	ENSG00000140807.4	20	rs12933686	896558	0.0213739	0.0510302	1
T	RP11-469J4.3	ENSG00000242578.1	82	rs16854335	-666730	0.0118733	0.0514516	1
N	RANGRF	ENSG00000108961.9	5	rs138420351	-491753	0.0263314	0.0535387	1
N	RP11-713H12.1	ENSG00000244604.1	3	rs138420351	-764486	0.0292231	0.0548386	1
T	CTD-2083E4.5	ENSG00000250848.1	16	rs2242652	991079	0.00717879	0.0559344	1
N	C9orf66	ENSG00000183784.5	71	rs10491592	470190	0.00494124	0.0560308	1
N	TEX11	ENSG00000120498.9	148	rs4551517	355816	0.00661431	0.0563131	1
N	MXD3	ENSG00000213347.6	72	rs251846	-250215	0.0299931	0.0580059	1
N	ERVMER34-1	ENSG00000226887.3	25	rs66529708	993204	0.0138617	0.0590112	1
N	NLGN2	ENSG00000169992.5	5	rs138420351	391869	0.0267342	0.0590543	1
N	RP11-259O2.3	ENSG00000249731.1	22	rs7449190	-670291	0.0061664	0.0598984	1
N	BCL6B	ENSG00000161940.6	5	0	491300	0.0307034	0.0600897	1
T	AP2A2	ENSG00000183020.9	52	rs3782121	-718960	0.00998768	0.0603386	1
N	MYCT1	ENSG00000120279.6	65	rs73781102	-480046	0.00413273	0.0616649	1
N	TRIP13	ENSG00000071539.9	22	rs7713218	390553	0.00597431	0.0620912	1
N	RAP2C	ENSG00000123728.5	215	rs5975330	116879	0.00470482	0.0625071	1
N	ATP1B2	ENSG00000129244.4	5	rs143094271	-86844	0.0291958	0.062916	1
N	RP5-1042K10.13	ENSG00000272834.1	32	rs732384	-269027	0.0261842	0.0637414	1
N	LRRC34	ENSG00000171757.11	82	rs2251795	-19488	0.0167091	0.0649737	1
N	VAMP2	ENSG00000220205.4	5	rs143094271	-599366	0.0334971	0.0682461	1
T	C1QB	ENSG00000173369.11	52	rs7519889	-506750	0.00880239	0.0682861	1
N	SLC25A35	ENSG00000125434.6	5	0	-773442	0.0311803	0.0686015	1
N	DOK3	ENSG00000146094.9	72	rs244716	-426040	0.0363956	0.0687137	1
T	AP000889.3	ENSG00000268467.1	88	rs10890848	898806	0.0125641	0.069896	1
N	RPL26	ENSG00000161970.8	5	rs138420351	-580776	0.0341672	0.0700216	1
T	RP3-443C4.2	ENSG00000233823.1	65	rs4870098	536577	0.00528339	0.0719094	1
T	RP11-589P10.5	ENSG00000262089.1	5	0	519678	0.0339239	0.0722256	1
T	KCTD11	ENSG00000213859.3	5	rs78378222	316543	0.0331208	0.0724777	1
N	RP11-143M1.7	ENSG00000144140.5	71	rs11790408	823965	0.00671476	0.0745917	1
N	MECOM	ENSG00000085276.13	82	rs2178401	778869	0.0189632	0.0746765	1
T	ZDHHC11	ENSG00000188818.8	22	rs7710703	577033	0.00782675	0.0749417	1
N	IL2RG	ENSG00000147168.8	148	rs5936607	-177851	0.00906167	0.0752238	1
T	NAT10	ENSG00000135372.4	34	rs2553772	958303	0.0459953	0.0762217	1
T	MYNN	ENSG00000085274.11	82	rs12630450	-10416	0.0181067	0.0765398	1
T	LUZP1	ENSG00000169641.9	31	rs10917163	-930276	0.0139812	0.0799759	1
N	ACRC	ENSG00000147174.7	108	rs5936580	-892061	0.0111745	0.082514	1
N	SOCS5P4	ENSG00000227536.1	148	rs5980704	-580398	0.0102396	0.0848001	1
N	KBTBD6	ENSG00000165572.6	166	rs9549282	-369811	0.0114561	0.0875086	1
T	HIGD2A	ENSG00000146066.2	72	rs6861925	508980	0.0497863	0.0876631	1
T	OGT	ENSG00000147162.9	118	rs11795627	-795493	0.0119665	0.0887897	1
N	GAPDHP37	ENSG00000231907.2	32	rs4821936	-436979	0.0359273	0.0890179	1
T	IL2RG	ENSG00000147168.8	148	rs5937000	-279467	0.0113965	0.0914958	1
N	RP1-65P5.1	ENSG00000227160.2	167	rs12282630	243803	0.00572795	0.095117	1
N	POLR2A	ENSG00000181222.10	5	rs143094271	75416	0.0440958	0.0953297	1
T	AP006621.1	ENSG00000177236.3	52	rs12226402	-564214	0.0161945	0.0959349	1
T	SH3PXD2A	ENSG00000107957.12	8	0	339346	0.0715052	0.0962944	1
T	USP48	ENSG00000090686.11	52	rs10917162	475427	0.0132981	0.0986459	1
T	C11orf65	ENSG00000166323.8	88	rs73006226	-106519	0.0181998	0.098663	1
T	CACNA1I	ENSG00000100346.13	32	rs12484951	736316	0.0423263	0.0988917	1
T	TSPAN4	ENSG00000214063.6	52	rs3782121	-636874	0.0173068	0.100907	1
T	LINC00339	ENSG00000218510.3	52	rs7519889	120824	0.0136266	0.101127	1
T	SLC7A3	ENSG00000165349.7	148	rs11795627	-187992	0.0131028	0.103543	1
N	ARL10	ENSG00000175414.6	72	rs244716	710397	0.0516772	0.107966	1
T	THOC3	ENSG00000051596.5	11	rs35977534	990354	0.0736366	0.108258	1
N	RP11-165F24.5	ENSG00000228115.1	71	rs2277163	339449	0.00988536	0.10935	1
T	RAP2C-AS1	ENSG00000232160.2	215	rs2770696	310046	0.0100923	0.109747	1
T	GSTO2	ENSG00000065621.10	8	rs4387287	-350735	0.0829602	0.110091	1
T	SNORA52	ENSG00000199785.1	52	rs1045502	-558864	0.0197406	0.115368	1
N	RP11-332O19.2	ENSG00000237827.1	8	rs1265164	790079	0.0627513	0.115537	1
T	RAP1GAP	ENSG00000076864.15	52	0	434520	0.0162115	0.117766	1
N	RP11-362K14.5	ENSG00000269984.1	82	rs13097028	-30039	0.0319829	0.11812	1
N	RP11-259O2.1	ENSG00000248994.1	22	rs7734992	-653850	0.0123696	0.118417	1
N	RP11-816J6.3	ENSG00000269889.1	82	rs2251795	4291	0.0334317	0.119888	1
N	RP11-541N10.3	ENSG00000260461.1	8	rs7907606	43499	0.0683118	0.120638	1
N	RP11-43F13.3	ENSG00000215246.4	22	rs2736099	300044	0.0128951	0.122366	1
N	NEURL4	ENSG00000215041.5	5	rs138420351	481115	0.0551548	0.122716	1
T	RN7SL246P	ENSG00000265093.1	155	rs2045556	405620	0.0267975	0.124124	1
T	GRAP2	ENSG00000100351.12	32	rs17332320	414533	0.0507571	0.124583	1
T	NPAT	ENSG00000149308.12	88	rs73006226	44785	0.0244596	0.126477	1
N	XAF1	ENSG00000132530.12	4	rs78378222	912985	0.0824725	0.126967	1
T	RP11-1391J7.1	ENSG00000250397.2	52	rs2734242	-598235	0.0239556	0.127184	1
T	HS6ST2	ENSG00000171004.13	215	rs3764771	-548810	0.0116103	0.127926	1
N	MPDU1	ENSG00000129255.10	5	0	91823	0.0595098	0.128827	1
N	MTRF1	ENSG00000120662.11	165	rs4325427	-573972	0.020764	0.129361	1
N	DMRT3	ENSG00000064218.4	71	rs10739107	-316114	0.0124869	0.129453	1
T	RP1-68D18.2	ENSG00000251194.2	34	rs2785152	-164030	0.0754103	0.133116	1
T	IGBP1	ENSG00000089289.11	148	rs5936580	552901	0.0170874	0.135081	1
N	TSPAN4	ENSG00000214063.6	52	rs11246002	-631362	0.0214673	0.137459	1
T	C1QC	ENSG00000159189.7	52	rs7519889	-497618	0.018809	0.137656	1
T	TAF1	ENSG00000147133.11	148	rs5936607	-436711	0.0182298	0.138219	1
T	RP11-379K17.12	ENSG00000268220.1	82	rs13097028	-340657	0.0361538	0.139132	1
T	SLN	ENSG00000170290.3	88	rs751343	788344	0.0286957	0.14131	1
N	RP11-172E9.2	ENSG00000230058.1	166	rs9549282	413800	0.0195676	0.143671	1
T	ALOX12P2	ENSG00000262943.3	5	0	660459	0.0662965	0.143897	1
N	RP11-416N2.4	ENSG00000273108.1	8	rs1265164	306477	0.0757152	0.144393	1
T	RGS17	ENSG00000091844.3	65	rs13211693	-538632	0.0112933	0.144434	1
N	ELP5	ENSG00000170291.10	5	rs138420351	545327	0.0675476	0.145423	1
T	NEURL	ENSG00000107954.6	8	rs11813268	428559	0.111104	0.147028	1
T	MIR3115	ENSG00000263793.1	37	rs10917167	-866708	0.027546	0.14835	1
T	SALL1	ENSG00000103449.7	20	rs12933686	308913	0.0625941	0.148442	1
N	RP1-4G17.5	ENSG00000262302.1	5	rs138420351	549914	0.0649203	0.150194	1
N	SORCS3	ENSG00000156395.8	8	rs9419958	-724914	0.0807227	0.15062	1
N	RP11-104H15.10	ENSG00000272884.1	5	rs78378222	228926	0.0711064	0.151686	1
T	LINC00598	ENSG00000215483.4	166	rs7989711	190564	0.0206416	0.153488	1
N	TCP11L1	ENSG00000176148.11	167	0	-674984	0.0101645	0.153628	1
N	CTD-2589H19.4	ENSG00000249908.1	22	rs7710703	519992	0.0162333	0.155273	1
T	MIR548S	ENSG00000265056.1	28	rs7568108	-224247	0.0258974	0.155836	1
N	FAM138C	ENSG00000218839.3	71	rs10491592	648904	0.015308	0.155947	1
N	CEP72	ENSG00000112877.6	22	rs11742908	658595	0.0166728	0.156248	1
N	CCDC147	ENSG00000120051.10	8	rs2488002	-434182	0.0804831	0.156542	1
T	CCDC170	ENSG00000120262.8	64	rs36019875	812787	0.0124593	0.158186	1
T	RN7SKP2	ENSG00000252812.1	166	rs9532562	172325	0.0210649	0.158309	1
N	TAF5	ENSG00000148835.9	8	rs1265164	547129	0.0785434	0.158429	1
T	AL133318.1	ENSG00000269120.1	166	rs7986407	68659	0.0217754	0.160039	1
N	NPAT	ENSG00000149308.12	88	rs61913679	-17842	0.0318388	0.160592	1
T	ZNF346	ENSG00000113761.7	72	rs35977534	-114467	0.0952814	0.16496	1
T	AC135178.1	ENSG00000198150.2	5	rs143094271	-798630	0.0774301	0.165243	1
N	RP11-31F19.1	ENSG00000226403.1	71	rs7044477	266586	0.0167502	0.16845	1
N	ZDHHC11B	ENSG00000206077.6	22	rs2853677	576718	0.0196501	0.168467	1
T	TPTE2P5	ENSG00000168852.8	166	rs9532585	-128347	0.0242816	0.171499	1
T	RP11-641D5.1	ENSG00000213178.3	82	rs10936596	266021	0.0452285	0.172027	1
N	WDR96	ENSG00000197748.8	8	rs9419958	-213701	0.0950846	0.179678	1
T	TEKT1	ENSG00000167858.8	4	0	886218	0.116278	0.182042	1
N	TP53	ENSG00000141510.11	5	rs138420351	134965	0.0799186	0.182711	1
T	IGJ	ENSG00000132465.6	19	rs2202282	-886818	0.0856449	0.185714	1
T	OBFC1	ENSG00000107960.6	8	rs11813268	39995	0.139844	0.186316	1
T	RP11-791G15.2	ENSG00000272275.1	28	rs7570979	809427	0.0340102	0.186837	1
T	EFNB3	ENSG00000108947.4	5	rs138420351	91542	0.0828671	0.188451	1
N	CTD-2083E4.5	ENSG00000250848.1	16	rs2736100	997567	0.0254395	0.189694	1
T	CTD-2589H19.4	ENSG00000249908.1	22	rs33961405	510064	0.0222536	0.19089	1
T	SNORD83B	ENSG00000209480.1	30	rs4821939	949426	0.0872051	0.191415	1
N	CXCR3	ENSG00000186810.7	97	rs4524964	-690966	0.0284772	0.191872	1
N	AC131571.2	ENSG00000203504.3	167	rs1022624	626470	0.0134479	0.192271	1
T	IGSF1	ENSG00000147255.13	119	rs5933051	760491	0.0332136	0.193055	1
N	RP11-89B16.1	ENSG00000249706.1	25	rs62323678	-224699	0.0476238	0.193998	1
T	BCL6B	ENSG00000161940.6	5	0	652331	0.0863073	0.194124	1
T	RP1-101K10.6	ENSG00000227627.1	65	rs9479289	-675787	0.0173012	0.198774	1
T	RP5-1091N2.9	ENSG00000228427.1	148	rs2281868	-734947	0.0277254	0.199452	1
N	Y_RNA	ENSG00000200118.1	82	rs10936598	-493370	0.057632	0.202142	1
N	KRBA2	ENSG00000184619.3	5	rs78378222	-700204	0.0969751	0.20241	1
N	MYH10	ENSG00000133026.8	5	rs138420351	-677461	0.0937677	0.202429	1
T	NKD2	ENSG00000145506.9	22	rs7734992	271183	0.0240281	0.202735	1
T	FAF2	ENSG00000113194.8	72	rs184784	565599	0.117453	0.204079	1
T	NDEL1	ENSG00000166579.11	5	rs143094271	-853348	0.0902523	0.205199	1
N	RNU11-3P	ENSG00000212413.1	8	0	615438	0.103801	0.20783	1
N	TMEM256-PLSCR3	ENSG00000187838.12	5	rs138420351	407016	0.0960971	0.209001	1
T	RP11-530N7.3	ENSG00000263316.1	5	rs138420351	842645	0.0950144	0.20991	1
N	COL17A1	ENSG00000065618.12	8	rs2488002	-111704	0.113874	0.211587	1
T	MYCT1	ENSG00000120279.6	65	rs13211693	-232068	0.0189032	0.213937	1
T	MST4	ENSG00000134602.11	215	rs7049577	178240	0.0205208	0.214799	1
N	CACNA1I	ENSG00000100346.13	32	rs8135487	660298	0.0887878	0.216976	1
T	CD68	ENSG00000129226.9	5	rs138420351	217277	0.0986839	0.217071	1
N	SOX15	ENSG00000129194.3	5	0	-73857	0.101441	0.217519	1
T	ELP5	ENSG00000170291.10	5	0	262904	0.1013	0.221296	1
T	ECE1	ENSG00000117298.10	52	rs12410251	938888	0.0330548	0.221645	1
T	MPDU1	ENSG00000129255.10	5	0	91823	0.0994898	0.222013	1
T	RMND1	ENSG00000155906.12	62	rs6928363	820104	0.0197427	0.222117	1
T	SLC25A15	ENSG00000102743.10	166	rs4943818	36924	0.0303594	0.222203	1
N	PRELID1	ENSG00000169230.5	72	rs35977534	-395545	0.109437	0.222796	1
N	SYNE1-AS1	ENSG00000234577.1	65	0	-51715	0.0179356	0.222839	1
T	LNX1	ENSG00000072201.9	25	rs62325481	138196	0.0569555	0.223414	1
T	PRELID1	ENSG00000169230.5	72	0	-379446	0.125486	0.224712	1
N	SNORD10	ENSG00000238917.1	5	rs143094271	-17028	0.100581	0.225402	1
T	KIF4A	ENSG00000090889.10	148	rs7059898	639198	0.030845	0.225414	1
T	RP11-31F19.1	ENSG00000226403.1	71	rs1812266	257756	0.0228031	0.225427	1
T	RP11-165F24.3	ENSG00000227155.3	71	rs2277163	372919	0.0249221	0.225508	1
T	PDGFRA	ENSG00000134853.7	25	rs66604018	-544950	0.0568371	0.228094	1
N	CDC42-IT1	ENSG00000230068.2	52	rs7519889	86815	0.0332185	0.228264	1
T	MIR621	ENSG00000207652.1	166	rs4943818	15570	0.0339656	0.228945	1
N	IGSF1	ENSG00000147255.13	119	rs7888560	763641	0.0410236	0.22926	1
N	NSD1	ENSG00000165671.14	72	rs547798	-233306	0.111914	0.231415	1
T	RN7SKP268	ENSG00000223039.1	43	rs6904757	952331	0.0261786	0.232278	1
T	RP4-756G23.5	ENSG00000235513.1	12	rs12484951	-902052	0.108027	0.23442	1
T	SLC35F2	ENSG00000110660.10	88	rs117706999	745225	0.0494266	0.235736	1
T	C5orf55	ENSG00000221990.2	22	rs7710703	845859	0.0294846	0.236141	1
N	SNORD83A	ENSG00000209482.1	30	rs8140112	821911	0.106365	0.239434	1
N	GPR160	ENSG00000173890.12	82	rs67795055	-225823	0.0705254	0.239546	1
N	MIEF1	ENSG00000100335.8	32	rs12484776	757435	0.103609	0.242275	1
T	RPLP2	ENSG00000177600.4	52	0	-609359	0.0472639	0.242526	1
N	CBWD1	ENSG00000172785.14	71	rs11790408	755376	0.0252069	0.242598	1
N	CTDNEP1	ENSG00000175826.7	5	rs78378222	424841	0.11238	0.243054	1
T	MED12	ENSG00000184634.11	148	rs5936580	-432206	0.0359199	0.244396	1
N	RP11-379K17.4	ENSG00000239219.2	82	rs2178401	-76985	0.0713499	0.24521	1
T	ELMOD1	ENSG00000110675.8	88	rs61913679	548283	0.0514126	0.24523	1
T	RP3-333H23.8	ENSG00000224794.1	29	rs8135487	938063	0.116768	0.245982	1
N	CCDC147-AS1	ENSG00000231233.1	8	0	-423718	0.13154	0.247325	1
T	SNX12	ENSG00000147164.7	148	rs5936604	-130505	0.0369445	0.252259	1
T	RPL3	ENSG00000100316.11	30	0	845557	0.106955	0.252869	1
N	POLR2L	ENSG00000177700.5	52	rs11246002	-625910	0.0416058	0.253197	1
T	CAPRIN1	ENSG00000135387.15	2	rs2553783	998887	0.220175	0.254762	1
N	P2RY4	ENSG00000186912.5	148	0	262007	0.0381933	0.255008	1
T	RP11-172E9.2	ENSG00000230058.1	166	rs9532580	326165	0.0385745	0.257368	1
T	KCNAB3	ENSG00000170049.5	5	rs138420351	-125115	0.120268	0.257398	1
N	WBP4	ENSG00000120688.7	166	rs2755209	-497607	0.0396851	0.262131	1
T	RPS23P8	ENSG00000230629.2	148	rs5936580	-276614	0.0386563	0.263661	1
N	EXPH5	ENSG00000110723.7	88	rs117706999	30784	0.0538219	0.265855	1
N	SLC13A5	ENSG00000141485.11	4	rs78378222	983719	0.170025	0.265935	1
T	LSMD1	ENSG00000183011.9	5	rs78378222	-188252	0.116812	0.266872	1
T	RP11-423H2.3	ENSG00000249684.1	50	rs187113	-936123	0.171769	0.267986	1
T	FGF11	ENSG00000161958.6	5	rs138420351	358470	0.126498	0.268094	1
T	ROCK2	ENSG00000134318.9	28	rs11686574	364119	0.0513987	0.26816	1
T	KDELC2	ENSG00000178202.8	88	rs74911261	14304	0.0551682	0.269	1
N	SLC6A3	ENSG00000142319.14	22	rs10069690	-113120	0.0318513	0.270035	1
N	VIP	ENSG00000146469.8	65	rs13218956	-418797	0.023913	0.272981	1
N	RGS17P1	ENSG00000229473.2	166	rs2755209	-429112	0.0423943	0.273654	1
N	RP11-362K14.7	ENSG00000270135.1	82	rs2251795	-19555	0.0801295	0.274528	1
N	GRAP2	ENSG00000100351.12	32	rs4821942	421013	0.120018	0.274976	1
T	PCED1B	ENSG00000179715.8	155	rs12230643	-524182	0.0647607	0.276379	1
T	UGT2A1	ENSG00000270386.1	19	rs1587766	112182	0.131261	0.27684	1
N	FAM153A	ENSG00000170074.15	72	rs251846	-656735	0.137393	0.277723	1
T	AC009166.5	ENSG00000261238.1	20	rs55881068	284251	0.114178	0.279234	1
T	RP11-1277A3.3	ENSG00000272459.1	72	rs35977534	-646595	0.165376	0.279501	1
N	SNORA52	ENSG00000199785.1	52	rs939924	-554374	0.0488986	0.279509	1
T	RP11-43F13.3	ENSG00000215246.4	22	rs2736099	300044	0.0372116	0.280173	1
T	HTN3	ENSG00000205649.3	19	rs7660770	-297154	0.125608	0.281606	1
N	LINC00598	ENSG00000215483.4	166	rs9549282	306763	0.0447878	0.282867	1
T	SCFD2	ENSG00000184178.11	25	rs67751869	829684	0.0699835	0.283185	1
N	RN7SL129P	ENSG00000241708.2	4	rs78378222	-878484	0.133178	0.286041	1
T	NOD2	ENSG00000167207.7	20	rs55881068	739887	0.121969	0.286224	1
T	GREB1	ENSG00000196208.9	28	rs11685032	52	0.0519774	0.287011	1
T	C1QA	ENSG00000173372.12	52	rs7519889	-490494	0.0464417	0.287274	1
N	RNASEK-C17orf49	ENSG00000161939.14	5	rs78378222	655797	0.139349	0.287748	1
N	CHADL	ENSG00000100399.11	12	rs12628042	-985002	0.138271	0.288548	1
T	UNC5A	ENSG00000113763.6	72	0	113851	0.168404	0.290095	1
N	CLEC10A	ENSG00000132514.9	5	0	600814	0.136803	0.290623	1
T	CHIC2	ENSG00000109220.6	25	rs66604018	-325642	0.0775741	0.291486	1
T	RP11-89B16.2	ENSG00000250815.1	25	rs62325482	-329246	0.075324	0.291513	1
N	RP11-530N7.3	ENSG00000263316.1	5	rs78378222	714334	0.130023	0.292919	1
T	ABTB2	ENSG00000166016.4	34	rs2732552	912056	0.161666	0.293083	1
T	SLC1A2	ENSG00000110436.7	34	rs2732549	-184355	0.166901	0.293203	1
T	RP11-571I18.4	ENSG00000272650.1	25	rs62323681	-315236	0.0747789	0.294978	1
T	RP11-368I23.3	ENSG00000272797.1	82	rs34194057	904287	0.0837779	0.295881	1
N	SYNE1	ENSG00000131018.18	65	rs4870098	228169	0.0251515	0.296078	1
T	MTRF1	ENSG00000120662.11	165	rs6563841	-551328	0.0519279	0.298117	1
N	GSTO2	ENSG00000065621.10	8	rs9419958	-352686	0.15865	0.298555	1
N	ST13	ENSG00000100380.8	32	rs4821942	-502440	0.125644	0.299196	1
N	TAB1	ENSG00000100324.9	32	rs8136269	736697	0.132056	0.30078	1
N	MIR5006	ENSG00000264190.1	158	rs4325427	-925889	0.0631098	0.300891	1
N	RGS17	ENSG00000091844.3	65	rs71575922	-771581	0.0271127	0.302543	1
N	PER1	ENSG00000179094.9	5	rs143094271	-580689	0.140716	0.303294	1
T	RP11-1334A24.6	ENSG00000248996.1	72	rs547798	-595276	0.170675	0.304203	1
T	CHD3	ENSG00000170004.12	5	rs138420351	-88062	0.142012	0.305643	1
N	CHRNB1	ENSG00000170175.6	5	0	69259	0.14579	0.306794	1
N	RP1-224A6.9	ENSG00000271840.1	52	rs10917119	-78698	0.0489177	0.309121	1
N	DDX10	ENSG00000178105.5	88	rs10789665	-179073	0.0631663	0.3105	1
N	ADSL	ENSG00000239900.7	32	rs1807579	-214288	0.133288	0.310797	1
N	RP11-143M1.2	ENSG00000225655.1	71	rs10815466	608012	0.0343115	0.311249	1
N	ASGR2	ENSG00000161944.12	5	0	412998	0.150087	0.312415	1
N	HSPD1P16	ENSG00000218792.2	65	rs1408462	-487690	0.0291925	0.313388	1
T	ARID2	ENSG00000189079.11	155	rs4768727	740756	0.075167	0.313782	1
T	RP11-401P9.5	ENSG00000260249.2	20	rs12933686	778677	0.137551	0.314698	1
N	KBTBD7	ENSG00000120696.8	165	rs9549282	-432075	0.0589952	0.315809	1
T	RPL7AP64	ENSG00000213876.4	5	rs143094271	418852	0.146315	0.319213	1
N	SLK	ENSG00000065613.9	8	rs1265164	-52106	0.169308	0.31936	1
N	PDGFRA	ENSG00000134853.7	25	rs67751869	-526431	0.0873353	0.319768	1
N	ELMOD1	ENSG00000110675.8	88	rs4754296	544364	0.0679649	0.320008	1
T	EXPH5	ENSG00000110723.7	88	rs117706999	30784	0.0692278	0.320281	1
T	SENP3	ENSG00000161956.8	5	rs138420351	234870	0.152692	0.321024	1
T	HK3	ENSG00000160883.6	72	rs353495	122852	0.180298	0.323087	1
T	PFAS	ENSG00000178921.9	5	0	-572266	0.147841	0.323835	1
N	AP006621.5	ENSG00000255284.1	52	0	-577290	0.0555	0.323934	1
T	NOL10	ENSG00000115761.11	24	rs12466575	952527	0.0782923	0.324562	1
N	TNFSF12	ENSG00000239697.6	5	0	-34569	0.147079	0.326045	1
N	RP11-401P9.4	ENSG00000261685.2	20	rs11649472	778227	0.144598	0.327446	1
N	MIR4698	ENSG00000263838.1	155	rs9669403	-782696	0.0851142	0.328883	1
N	C2orf50	ENSG00000150873.7	28	rs1865574	408258	0.0713152	0.332162	1
N	CSTF3-AS1	ENSG00000247151.2	167	rs12789861	-822982	0.0275288	0.332418	1
T	MECOM	ENSG00000085276.13	82	rs4955575	733250	0.0973077	0.332837	1
N	AC027763.2	ENSG00000215067.5	5	rs143094271	683147	0.157425	0.33334	1
T	FAM138C	ENSG00000218839.3	71	rs10975740	642346	0.0393495	0.334083	1
N	RAP1GAP	ENSG00000076864.15	52	rs56104760	563320	0.0541282	0.334732	1
T	MIR497HG	ENSG00000267532.2	5	rs78378222	652614	0.154646	0.335678	1
N	RPS19BP1	ENSG00000187051.4	32	rs12628042	715417	0.143431	0.337082	1
T	KRBA2	ENSG00000184619.3	5	rs78378222	-700204	0.148974	0.337287	1
T	TMED9	ENSG00000184840.7	72	rs6861925	-694431	0.194767	0.337466	1
T	TRIM44	ENSG00000166326.5	34	rs2732552	-599762	0.191201	0.337583	1
T	PRR7	ENSG00000131188.7	72	rs244716	-370578	0.194076	0.338449	1
N	RMND1	ENSG00000155906.12	62	rs9383979	829443	0.0338792	0.338678	1
N	FGF11	ENSG00000161958.6	5	0	237078	0.15976	0.340771	1
N	SLC2A4	ENSG00000181856.10	5	rs143094271	278115	0.154774	0.34081	1
T	RP11-23J18.1	ENSG00000258352.1	155	rs73101378	-651005	0.08167	0.341469	1
N	AC129492.6	ENSG00000214999.3	5	0	-565161	0.14838	0.341789	1
N	AL133318.1	ENSG00000269120.1	166	rs9549282	220756	0.0552639	0.342826	1
N	TNFSF13	ENSG00000161955.12	5	rs143094271	1492	0.161997	0.342847	1
T	CD44	ENSG00000026508.12	34	rs2732544	-67467	0.198063	0.343008	1
T	AP006621.6	ENSG00000255142.1	52	rs11246001	-570747	0.0715748	0.344171	1
N	WT1-AS	ENSG00000183242.7	167	rs3858437	-71407	0.0282012	0.345825	1
T	RP11-453F18__B.1	ENSG00000213468.3	215	rs5933158	741355	0.0403482	0.346884	1
T	LPCAT1	ENSG00000153395.5	22	rs7449190	-158678	0.0471684	0.348945	1
N	RP11-46J23.1	ENSG00000272986.1	8	rs2102221	-964949	0.177383	0.350761	1
T	RP11-530N7.2	ENSG00000262503.1	5	rs138420351	869271	0.157358	0.350773	1
T	DBN1	ENSG00000113758.9	72	rs251848	-391053	0.211875	0.351493	1
N	MGAT3	ENSG00000128268.11	32	rs4821936	779160	0.150294	0.351534	1
N	MBNL3	ENSG00000076770.10	215	rs17251133	133513	0.0399601	0.351562	1
T	RP11-849F2.7	ENSG00000263809.1	5	rs143094271	-808855	0.166201	0.353207	1
T	AL590762.7	ENSG00000213706.2	148	rs5936607	-422865	0.0567594	0.353765	1
N	RN7SKP2	ENSG00000252812.1	166	rs9532600	453548	0.055631	0.35565	1
T	MTRF1L	ENSG00000112031.11	65	rs13211693	-521535	0.0347453	0.358192	1
N	ENTHD1	ENSG00000176177.9	32	rs17332320	572570	0.154779	0.358861	1
N	SLC25A22	ENSG00000177542.6	52	rs11246002	-579029	0.0636411	0.358882	1
N	RNU6-379P	ENSG00000200683.1	32	rs8140695	-782242	0.154289	0.359134	1
T	TSPAN17	ENSG00000048140.13	72	rs547798	252332	0.207521	0.359557	1
N	SNX12	ENSG00000147164.7	148	rs1325094	-434298	0.0607853	0.360326	1
T	LINC00938	ENSG00000273015.1	155	rs2131371	677011	0.0916702	0.363865	1
N	MRPS31	ENSG00000102738.6	166	rs4943804	-33439	0.0593042	0.364407	1
N	ROCK2	ENSG00000134318.9	28	rs11674184	401647	0.0813436	0.364911	1
N	FRMD7	ENSG00000165694.5	215	rs9698786	321787	0.0441961	0.365194	1
N	EIF5A	ENSG00000132507.13	5	0	207321	0.169452	0.366133	1
T	GPR160	ENSG00000173890.12	82	rs2178401	-175561	0.103841	0.367312	1
N	L3MBTL2	ENSG00000100395.10	12	rs12628042	-960694	0.176786	0.368922	1
N	CLDN7	ENSG00000181885.14	5	0	254417	0.172177	0.370513	1
N	RP11-844P9.2	ENSG00000248596.2	72	rs251846	908159	0.189665	0.370614	1
T	CTD-2545G14.7	ENSG00000262526.2	5	rs78378222	428005	0.177711	0.372281	1
N	FOXD4	ENSG00000170122.4	71	rs2277163	710986	0.044451	0.37237	1
N	COG6	ENSG00000133103.12	92	rs117245733	494179	0.102315	0.37397	1
T	SNORA48	ENSG00000209582.1	5	rs138420351	222031	0.181241	0.374826	1
T	FAM193B	ENSG00000146067.11	72	rs244715	-443227	0.209597	0.376282	1
N	RNF44	ENSG00000146083.7	72	rs251846	524549	0.181917	0.378269	1
T	ITPRIP	ENSG00000148841.11	8	rs11813268	-389599	0.270766	0.379191	1
T	RNU2-13P	ENSG00000251718.1	28	rs11685032	-27026	0.0761843	0.383529	1
T	RP11-327F22.2	ENSG00000261644.1	20	rs11649472	688323	0.176666	0.38358	1
T	COL17A1	ENSG00000065618.12	8	rs2488002	-111704	0.267925	0.385334	1
T	MIR4698	ENSG00000263838.1	155	rs2045556	-908163	0.0953293	0.386427	1
N	KCTD11	ENSG00000213859.3	5	0	323462	0.187893	0.38835	1
T	LRRC31	ENSG00000114248.5	82	rs4955676	11524	0.114116	0.388821	1
N	SNORA69	ENSG00000212206.1	5	0	-815262	0.184834	0.38921	1
N	RP11-752D24.2	ENSG00000248115.1	25	rs62323681	736530	0.108699	0.389931	1
N	KIAA1191	ENSG00000122203.10	72	rs547798	553656	0.200416	0.390365	1
N	TMEM107	ENSG00000179029.10	5	rs138420351	-376493	0.183263	0.390874	1
T	ZBTB40	ENSG00000184677.12	52	rs10917162	-298126	0.067684	0.391981	1
T	BRD9	ENSG00000028310.13	22	rs7734992	429721	0.0565586	0.392358	1
T	CCDC147	ENSG00000120051.10	8	rs9419958	-437577	0.284134	0.393599	1
N	PHF23	ENSG00000040633.8	5	0	440323	0.172757	0.395167	1
N	RP11-130C19.3	ENSG00000227914.3	71	rs4742449	153177	0.0458575	0.39613	1
T	VAMP2	ENSG00000220205.4	5	0	-644828	0.187185	0.396241	1
T	ACAT1	ENSG00000075239.9	88	rs111559044	262210	0.0897203	0.398186	1
N	FBXO5	ENSG00000112029.5	65	rs78900103	-751634	0.0357578	0.398561	1
N	FIP1L1	ENSG00000145216.11	25	rs62323681	304536	0.115745	0.399004	1
T	RP11-752D24.2	ENSG00000248115.1	25	rs66604018	738498	0.105772	0.399104	1
N	RP5-1091N2.3	ENSG00000229324.1	148	rs7890786	-130057	0.0661986	0.400574	1
T	SAT2	ENSG00000141504.7	5	rs138420351	170510	0.189122	0.400713	1
T	DOCK8	ENSG00000107099.11	71	rs1323267	586747	0.0472017	0.40585	1
N	ALPL	ENSG00000162551.9	52	0	521370	0.0695621	0.406514	1
T	ARHGEF15	ENSG00000198844.6	5	rs138420351	-513497	0.182006	0.40716	1
N	SLC12A7	ENSG00000113504.15	22	rs7734992	229628	0.0558344	0.407259	1
T	SNX20	ENSG00000167208.10	20	rs12933686	778588	0.177741	0.407495	1
N	AURKB	ENSG00000178999.8	5	0	-690417	0.190383	0.410468	1
T	RNU6-1327P	ENSG00000202172.1	71	rs4742415	242879	0.0507967	0.410705	1
N	RP11-641D5.1	ENSG00000213178.3	82	rs28626343	324812	0.128682	0.41164	1
N	RASL11B	ENSG00000128045.5	25	rs55731250	732398	0.117096	0.412773	1
T	RNU11-3P	ENSG00000212413.1	8	rs9419958	603752	0.291455	0.413252	1
N	FBXO39	ENSG00000177294.6	4	0	899128	0.273697	0.413667	1
T	HNRNPA1P48	ENSG00000224578.3	20	rs12325192	-191539	0.182825	0.413807	1
N	RP11-1277A3.3	ENSG00000272459.1	72	rs6861925	-657097	0.214286	0.413819	1
N	WNT4	ENSG00000162552.10	52	rs12404660	14995	0.0764687	0.415373	1
T	SLC2A4	ENSG00000181856.10	5	rs138420351	515076	0.200783	0.4172	1
T	ASGR1	ENSG00000141505.7	5	rs138420351	623312	0.199652	0.417513	1
N	AC018463.4	ENSG00000230154.1	28	rs6432220	262564	0.0948774	0.418098	1
N	C5orf55	ENSG00000221990.2	22	rs2736099	845694	0.0586181	0.418244	1
T	MRPS31	ENSG00000102738.6	166	rs4941986	-113730	0.0704939	0.418389	1
N	ACAT1	ENSG00000075239.9	88	rs117706999	414699	0.0941862	0.418821	1
T	RPS19BP1	ENSG00000187051.4	32	rs4821936	707411	0.180536	0.41945	1
T	SNORA26	ENSG00000212588.1	23	rs62325515	953077	0.114899	0.420036	1
N	SNORA48	ENSG00000209582.1	5	rs143094271	-14930	0.206932	0.421119	1
T	TAB1	ENSG00000100324.9	32	rs4821942	922353	0.188477	0.422265	1
T	KIAA1191	ENSG00000122203.10	72	rs547798	553656	0.247167	0.422356	1
N	OR7A19P	ENSG00000272963.1	155	rs7311504	-155581	0.120996	0.423787	1
T	PDIA6	ENSG00000143870.8	28	0	760447	0.0892324	0.424358	1
N	SLC25A17	ENSG00000100372.10	32	rs4821942	-447535	0.187416	0.425806	1
N	THOC3	ENSG00000051596.5	11	rs547798	981844	0.287976	0.426048	1
N	PIDD	ENSG00000177595.13	52	0	-598891	0.0827427	0.42679	1
T	RP11-177B4.1	ENSG00000248375.1	25	rs66529708	995741	0.121213	0.428561	1
T	DMRT3	ENSG00000064218.4	71	rs73372926	-293563	0.0558588	0.429827	1
T	RGS17P1	ENSG00000229473.2	166	rs9532600	-132108	0.071365	0.430416	1
N	RNASEK	ENSG00000219200.6	5	rs138420351	784326	0.205425	0.431615	1
N	LPCAT1	ENSG00000153395.5	22	rs7725218	-174182	0.0643327	0.433664	1
N	NLGN3	ENSG00000196338.8	148	rs5936580	-458481	0.0737895	0.434081	1
N	CLTB	ENSG00000175416.8	72	rs35977534	515774	0.220682	0.435097	1
T	RNU6-375P	ENSG00000252859.1	12	rs4821942	-846122	0.21975	0.435674	1
N	AC026740.1	ENSG00000268885.1	22	rs11742908	603223	0.0652155	0.437647	1
N	PCED1B-AS1	ENSG00000247774.2	155	rs2131371	-803160	0.122248	0.437939	1
T	FAM153B	ENSG00000182230.7	67	rs2292256	845433	0.26695	0.437944	1
N	ALKBH8	ENSG00000137760.10	87	rs11607588	632703	0.104864	0.439186	1
N	RP11-453F18__B.1	ENSG00000213468.3	215	rs2770693	811635	0.0562219	0.439765	1
T	ZBTB40-IT1	ENSG00000237200.1	52	rs10917151	-421247	0.0780942	0.440342	1
T	P2RY4	ENSG00000186912.5	148	rs5981016	614816	0.0750248	0.441076	1
T	UGT2A2	ENSG00000271271.1	19	rs13133166	146063	0.221067	0.442266	1
T	RP11-362K14.6	ENSG00000270096.1	82	rs34194057	36800	0.131106	0.443096	1
T	AC040977.1	ENSG00000269871.1	5	rs78378222	655823	0.205656	0.443221	1
N	RP11-352M15.1	ENSG00000257657.2	143	rs7301001	955186	0.151504	0.443801	1
T	SYNGR1	ENSG00000100321.10	32	rs4821942	972169	0.190671	0.444089	1
T	ERVMER34-1	ENSG00000226887.3	25	rs62325482	875635	0.122871	0.44413	1
T	CHADL	ENSG00000100399.11	12	rs12628042	-985002	0.214969	0.445551	1
T	CNNM2	ENSG00000148842.13	4	rs9419958	997895	0.320983	0.445679	1
T	SDHAP3	ENSG00000185986.10	22	rs2853676	-280091	0.0661145	0.446044	1
N	DOCK8	ENSG00000107099.11	71	rs4742415	586851	0.0569938	0.446711	1
T	CTD-2228K2.7	ENSG00000225138.3	22	rs2853676	815195	0.0634098	0.449393	1
T	RP11-3K16.2	ENSG00000242795.2	82	rs13097028	133643	0.143406	0.449521	1
T	RP5-1091N2.3	ENSG00000229324.1	148	0	-496358	0.0799185	0.449767	1
N	SLC38A1	ENSG00000111371.11	155	rs9669403	222053	0.126812	0.45489	1
T	OR7A19P	ENSG00000272963.1	155	rs73101378	-108080	0.122541	0.455267	1
T	snoU13	ENSG00000238887.1	32	rs11089974	-767276	0.203589	0.455431	1
N	PDIA6	ENSG00000143870.8	28	rs4669743	738660	0.107418	0.458337	1
T	HSPG2	ENSG00000142798.12	52	rs10917123	207239	0.0840999	0.458427	1
N	IGJ	ENSG00000132465.6	19	rs35487626	-873481	0.211012	0.458577	1
N	RP3-363L9.1	ENSG00000227064.1	215	rs112018795	-483238	0.0614554	0.458699	1
T	VWA8	ENSG00000102763.11	163	rs9549296	-743779	0.101192	0.459882	1
N	RUFY3	ENSG00000018189.8	8	rs35487626	-922144	0.24611	0.460506	1
T	CXCR3	ENSG00000186810.7	97	rs5936983	-834742	0.0856464	0.462161	1
T	EFCAB4A	ENSG00000177685.12	52	rs524555	-579467	0.102508	0.46223	1
T	RP11-43F13.4	ENSG00000272347.1	22	rs56023411	286585	0.0717919	0.46261	1
N	ATP6V1C2	ENSG00000143882.5	28	rs6432220	848940	0.107712	0.462762	1
T	RP11-844P9.2	ENSG00000248596.2	72	rs35977534	765142	0.267571	0.462952	1
N	INA	ENSG00000148798.5	8	rs4387287	640976	0.253438	0.463735	1
N	MIR4766	ENSG00000266594.1	32	rs4821936	-577378	0.212038	0.464686	1
T	RN7SL674P	ENSG00000239899.2	28	rs7570979	-7471	0.0965754	0.466113	1
T	UTP3	ENSG00000132467.2	13	rs2202282	-919756	0.239127	0.46748	1
T	CEP72	ENSG00000112877.6	22	rs7710703	675117	0.0726699	0.471368	1
N	HS6ST2	ENSG00000171004.13	215	rs5933158	-182011	0.0625815	0.471654	1
N	TMED9	ENSG00000184840.7	72	rs547798	-692439	0.249145	0.474204	1
N	CTD-2589H19.6	ENSG00000271781.1	22	rs33961405	601635	0.0664241	0.475552	1
N	ASGR1	ENSG00000141505.7	5	rs138420351	623312	0.233381	0.476984	1
T	CD151	ENSG00000177697.13	52	rs3782121	-626909	0.105818	0.477009	1
N	RN7SL674P	ENSG00000239899.2	28	rs10929753	-54595	0.110036	0.478448	1
T	C17orf59	ENSG00000196544.6	5	0	-512982	0.237745	0.480262	1
T	RP1-74M1.3	ENSG00000272796.1	52	rs7517829	-763017	0.0921879	0.480571	1
T	RP11-46J23.1	ENSG00000272986.1	8	rs12640488	-968727	0.280696	0.480922	1
N	XXyac-YRM2039.2	ENSG00000181404.13	71	rs2296055	662442	0.0648204	0.481414	1
T	GPRIN1	ENSG00000169258.6	72	rs547798	303917	0.280037	0.482217	1
T	XAF1	ENSG00000132530.12	4	0	758873	0.313674	0.483608	1
N	AHRR	ENSG00000063438.12	22	rs7713218	979020	0.076878	0.486203	1
T	APIP	ENSG00000149089.8	34	rs1116471	219990	0.29515	0.486693	1
N	MCHR1	ENSG00000128285.4	32	rs1807579	-546535	0.228655	0.487406	1
T	CYB5D1	ENSG00000182224.7	5	0	-343425	0.237037	0.487565	1
T	CTD-2245E15.3	ENSG00000251532.1	22	rs2853676	-255676	0.0767309	0.488521	1
N	RP11-1391J7.1	ENSG00000250397.2	52	rs12226402	-640977	0.103702	0.488577	1
N	RP1-74M1.3	ENSG00000272796.1	52	rs10917128	-877074	0.0911154	0.489889	1
N	CYLD	ENSG00000083799.13	20	rs11649472	681986	0.233254	0.491011	1
T	RNU6-310P	ENSG00000207385.1	25	rs66604018	418686	0.147212	0.492112	1
T	CTD-2589H19.6	ENSG00000271781.1	22	rs2853676	612605	0.0737684	0.492493	1
N	LDLRAD2	ENSG00000187942.7	52	rs7515106	334651	0.0892795	0.493589	1
T	RNU6-379P	ENSG00000200683.1	32	rs12628042	-673232	0.226038	0.494563	1
N	FAF2	ENSG00000113194.8	72	rs244715	628933	0.254693	0.494997	1
N	PCED1B	ENSG00000179715.8	155	rs1492894	-744719	0.141832	0.496005	1
N	TEKT1	ENSG00000167858.8	4	rs78378222	879299	0.314676	0.501239	1
T	PDZD11	ENSG00000120509.6	148	rs5936580	399755	0.0915235	0.501286	1
T	MRPL36	ENSG00000171421.8	22	rs72709458	-514746	0.0792612	0.501517	1
T	RNASEK	ENSG00000219200.6	5	rs138420351	784326	0.244667	0.502687	1
N	CHD3	ENSG00000170004.12	5	rs138420351	-88062	0.248237	0.502807	1
N	RNU6-375P	ENSG00000252859.1	12	rs8135487	-937165	0.253912	0.502933	1
T	SYNE1-AS1	ENSG00000234577.1	65	rs17803970	-147964	0.0575834	0.502988	1
N	RNU6-1025P	ENSG00000222561.1	52	rs73386631	-746405	0.103245	0.503062	1
T	DVL2	ENSG00000004975.7	5	rs138420351	571402	0.239471	0.503264	1
N	CD151	ENSG00000177697.13	52	rs11246002	-621397	0.104601	0.50409	1
N	RAB39A	ENSG00000179331.2	88	rs111559044	455224	0.124768	0.504617	1
N	HK3	ENSG00000160883.6	72	rs35977534	27360	0.258625	0.50476	1
N	VWA8	ENSG00000102763.11	163	rs2701861	-998976	0.120722	0.505291	1
N	PDDC1	ENSG00000177225.12	52	rs11246002	-555774	0.106835	0.50727	1
T	PCGF6	ENSG00000156374.10	8	rs11813268	619742	0.378797	0.507294	1
N	ACTRT3	ENSG00000184378.2	82	rs28626343	41562	0.16631	0.507439	1
T	HSPD1P16	ENSG00000218792.2	65	rs73005444	-474704	0.0585451	0.512154	1
T	KBTBD7	ENSG00000120696.8	165	rs9549260	-509866	0.106952	0.513603	1
N	RP11-446N19.1	ENSG00000272369.1	155	rs11534993	-113724	0.151739	0.514502	1
N	E2F6	ENSG00000169016.12	28	rs11674184	137033	0.125638	0.514997	1
T	RP11-446N19.1	ENSG00000272369.1	155	rs9669403	-132386	0.141582	0.515854	1
T	RN7SL832P	ENSG00000243819.3	28	rs10929753	839834	0.114793	0.516143	1
T	UIMC1	ENSG00000087206.12	72	rs6861925	-7278	0.300938	0.517384	1
T	PDDC1	ENSG00000177225.12	52	rs3782121	-561286	0.119775	0.518445	1
T	SGSM3	ENSG00000100359.16	32	0	-212151	0.235341	0.518807	1
N	HSPA8P15	ENSG00000219395.2	62	0	828521	0.0605229	0.51959	1
N	SCARNA21	ENSG00000252835.1	5	rs143094271	-346339	0.251354	0.521204	1
T	FAM153A	ENSG00000170074.15	72	rs6861925	-810254	0.304382	0.52205	1
T	UGT2B11	ENSG00000213759.4	19	rs35487626	582108	0.26704	0.522364	1
N	RPL7AP64	ENSG00000213876.4	5	rs138420351	655813	0.251556	0.522937	1
T	PHC3	ENSG00000173889.11	82	rs6789970	-232711	0.16336	0.522998	1
N	RP4-756G23.5	ENSG00000235513.1	12	rs17332320	-893507	0.264755	0.523647	1
T	SLC38A2	ENSG00000134294.9	155	0	206236	0.142707	0.523817	1
T	USMG5	ENSG00000173915.8	8	rs7907606	531833	0.390268	0.524277	1
N	FOXO1	ENSG00000150907.6	166	rs9549282	202090	0.101235	0.524827	1
T	DMRT2	ENSG00000173253.10	71	rs12004436	-366925	0.0715754	0.5249	1
T	EP300	ENSG00000100393.9	32	rs4821939	-828540	0.238969	0.52616	1
N	TMEM88	ENSG00000167874.6	5	rs78378222	-186632	0.268456	0.526217	1
T	CTD-3080P12.3	ENSG00000249201.2	22	rs7734992	106871	0.0826845	0.530793	1
T	EIF4A1	ENSG00000161960.10	5	rs138420351	224038	0.265449	0.532748	1
N	RP11-416N2.3	ENSG00000226431.1	8	rs11813268	373463	0.286546	0.534777	1
N	AKAP12	ENSG00000131016.12	33	rs6557208	983349	0.131834	0.535863	1
T	RANGRF	ENSG00000108961.9	5	rs138420351	-491753	0.262299	0.538981	1
N	RP11-177B4.1	ENSG00000248375.1	25	rs62323681	962098	0.165874	0.540112	1
T	MIR4482-1	ENSG00000266852.1	8	rs2488002	-348740	0.391589	0.540723	1
T	CYLD	ENSG00000083799.13	20	rs66998222	705634	0.256313	0.542494	1
N	SCAF11	ENSG00000139218.13	155	rs12230643	636290	0.162266	0.544007	1
T	PQLC3	ENSG00000162976.8	28	rs6432220	415391	0.127815	0.546065	1
N	CD68	ENSG00000129226.9	5	0	95885	0.26432	0.548659	1
N	SKIL	ENSG00000136603.9	82	rs10936598	-606266	0.18585	0.549127	1
T	EXOC3	ENSG00000180104.11	22	rs11742908	827709	0.089097	0.549162	1
T	CNTROB	ENSG00000170037.9	5	rs138420351	-135357	0.27286	0.549181	1
T	ATP6V1C2	ENSG00000143882.5	28	0	822189	0.121396	0.551011	1
T	L3MBTL2	ENSG00000100395.10	12	rs143521471	-961504	0.273297	0.551132	1
N	RPS23P8	ENSG00000230629.2	148	rs4844261	-187937	0.100901	0.553232	1
N	SFR1	ENSG00000156384.10	8	rs9419958	-205871	0.309856	0.553372	1
N	DEPDC7	ENSG00000121690.5	167	0	-666196	0.0563181	0.55727	1
N	RP11-152C17.1	ENSG00000241383.1	82	rs10936598	748338	0.192732	0.557416	1
T	PHF23	ENSG00000040633.8	5	rs138420351	561715	0.273702	0.557888	1
N	NBPF3	ENSG00000142794.14	52	rs10917130	604443	0.111941	0.56178	1
T	NBPF2P	ENSG00000227001.2	52	rs10917119	597290	0.108945	0.564175	1
N	CYCSP34	ENSG00000176268.5	166	rs9532564	-277157	0.112019	0.564827	1
T	CBWD1	ENSG00000172785.14	71	rs138821078	553175	0.0803809	0.565179	1
T	SLC38A4	ENSG00000139209.11	155	rs10785628	-303871	0.160423	0.567515	1
N	MIR320D1	ENSG00000211491.2	166	rs9549243	-84760	0.113797	0.567845	1
T	TOX3	ENSG00000103460.12	5	rs12933686	-993118	0.478147	0.568258	1
T	POLR2L	ENSG00000177700.5	52	rs3782121	-631422	0.142984	0.569322	1
T	RP11-541N10.3	ENSG00000260461.1	8	rs11813268	45163	0.427689	0.569361	1
T	ACRC	ENSG00000147174.7	108	rs5981021	-693475	0.11902	0.571925	1
N	MIR4482-1	ENSG00000266852.1	8	rs7907606	-347449	0.321902	0.57359	1
T	YBX2	ENSG00000006047.8	5	rs138420351	508491	0.285704	0.573987	1
T	SLC16A13	ENSG00000174327.6	5	0	639276	0.278416	0.574177	1
T	RP11-379K17.4	ENSG00000239219.2	82	rs2251795	-165413	0.194461	0.574271	1
N	SGSM3	ENSG00000100359.16	32	rs8136269	-234152	0.273089	0.576545	1
T	GSTO1	ENSG00000148834.8	8	rs11813268	-312819	0.417317	0.57819	1
T	RP11-165F24.5	ENSG00000228115.1	71	rs10739107	173076	0.086076	0.578221	1
T	MIR320D1	ENSG00000211491.2	166	rs4943818	98508	0.112167	0.580065	1
T	RP1-224A6.9	ENSG00000271840.1	52	rs10917167	76984	0.11521	0.58195	1
N	AL590762.7	ENSG00000213706.2	148	rs62608084	-447166	0.109002	0.583304	1
N	MST4	ENSG00000134602.11	215	rs5975330	296639	0.0889223	0.585774	1
T	ZBTB4	ENSG00000174282.7	5	rs78378222	209066	0.302167	0.586171	1
T	RP11-849F2.8	ENSG00000269928.1	5	rs78378222	-556388	0.301832	0.586297	1
N	RP11-589P10.7	ENSG00000267047.1	5	rs143094271	574288	0.291412	0.586708	1
T	E2F6	ENSG00000169016.12	28	rs10929757	118159	0.142258	0.587972	1
T	DANCR	ENSG00000226950.2	23	rs62323674	959171	0.181008	0.588122	1
T	ENAM	ENSG00000132464.7	19	rs35487626	-846684	0.319061	0.588374	1
T	EIF5A	ENSG00000132507.13	5	rs138420351	489744	0.289505	0.588449	1
T	DOK3	ENSG00000146094.9	72	rs251848	-436352	0.35185	0.58946	1
N	SIMC1	ENSG00000170085.13	72	rs149307	806225	0.321639	0.59059	1
T	TMEM256	ENSG00000205544.3	5	rs138420351	393768	0.309017	0.592152	1
N	RP11-165F24.2	ENSG00000235330.2	71	rs10739107	183100	0.0852692	0.592852	1
T	NLGN3	ENSG00000196338.8	148	rs5937006	-282840	0.117226	0.593376	1
T	ALOX15B	ENSG00000179593.11	5	rs138420351	-242273	0.307675	0.597244	1
T	RGCC	ENSG00000102760.12	165	rs9549260	-777592	0.138292	0.597284	1
T	HSPA8P15	ENSG00000219395.2	62	rs6901631	834652	0.0756249	0.597385	1
N	YBX2	ENSG00000006047.8	5	rs143094271	271530	0.303781	0.597461	1
N	RP11-373E16.3	ENSG00000244738.1	82	rs67795055	-844457	0.205847	0.599427	1
N	TPTE2P5	ENSG00000168852.8	166	rs9532600	38375	0.122449	0.59973	1
T	ZNF346-IT1	ENSG00000251666.1	72	rs547798	-151995	0.359419	0.599896	1
T	PDCD6	ENSG00000249915.3	1	rs11742908	999246	0.592616	0.601902	1
N	RAP2C-AS1	ENSG00000232160.2	215	rs2028478	387146	0.090978	0.603169	1
T	RP11-1277A3.1	ENSG00000247679.2	72	rs244715	-534692	0.378601	0.603673	1
N	OBFC1	ENSG00000107960.6	8	0	45331	0.347357	0.605396	1
N	RP11-849F2.7	ENSG00000263809.1	5	0	-854317	0.324567	0.606753	1
N	MIR621	ENSG00000207652.1	166	rs2755209	-247099	0.127007	0.60852	1
N	C1QC	ENSG00000159189.7	52	rs10917162	-489905	0.127754	0.609444	1
T	SCAF11	ENSG00000139218.13	155	rs7486915	556307	0.18077	0.60975	1
N	RP3-408N23.4	ENSG00000230769.1	32	rs8135487	-557725	0.304	0.612666	1
T	RP1-145M24.1	ENSG00000254708.1	34	rs2553773	726967	0.375613	0.612966	1
T	FXR2	ENSG00000129245.7	5	rs138420351	205514	0.313912	0.613184	1
T	RP11-589P10.7	ENSG00000267047.1	5	rs138420351	811249	0.317413	0.61429	1
T	AC026740.1	ENSG00000268885.1	22	rs11742908	603223	0.10873	0.614487	1
T	PIDD	ENSG00000177595.13	52	rs3782121	-593245	0.158752	0.615141	1
T	VIP	ENSG00000146469.8	65	rs75510204	-479254	0.0741353	0.615916	1
N	ALOX15B	ENSG00000179593.11	5	rs78378222	-370584	0.326942	0.616289	1
N	RP11-368I23.3	ENSG00000272797.1	82	rs12630450	834940	0.21148	0.616392	1
N	RCN1	ENSG00000049449.4	167	rs11031704	496178	0.0677129	0.617718	1
N	EIF4A1	ENSG00000161960.10	5	rs143094271	-12923	0.314546	0.619481	1
N	KDELC2	ENSG00000178202.8	88	rs1800057	-199377	0.166057	0.620747	1
T	RPL4P6	ENSG00000230071.2	32	rs8135487	-355648	0.307712	0.623479	1
N	CLDN11	ENSG00000013297.6	82	rs1881984	-672195	0.223659	0.624952	1
T	CWF19L2	ENSG00000152404.11	24	rs73006226	875656	0.195519	0.626393	1
N	RP3-370M22.8	ENSG00000225528.1	32	rs12484951	346673	0.315401	0.62688	1
T	TP53	ENSG00000141510.11	5	rs143094271	-101996	0.318377	0.628939	1
N	SLC38A4	ENSG00000139209.11	155	rs73101378	-280270	0.200992	0.629169	1
T	RP11-1277A3.2	ENSG00000246596.2	72	rs35977534	-710830	0.389385	0.629922	1
T	FIP1L1	ENSG00000145216.11	25	rs66604018	306504	0.195703	0.630769	1
T	KCNF1	ENSG00000162975.3	28	0	631901	0.152114	0.631004	1
T	UGT2B7	ENSG00000171234.9	19	rs2202282	717359	0.334229	0.632837	1
T	WRAP53	ENSG00000141499.12	5	0	-10719	0.325926	0.633548	1
N	ZNF346	ENSG00000113761.7	72	rs35977534	-114467	0.35136	0.633763	1
N	ZBTB40-IT1	ENSG00000237200.1	52	rs7519889	-371462	0.137991	0.634853	1
N	AP2A2	ENSG00000183020.9	52	rs11246002	-713448	0.147473	0.635719	1
T	FOXD4	ENSG00000170122.4	71	rs10975740	560503	0.102723	0.635771	1
N	RP11-89B16.2	ENSG00000250815.1	25	rs62325482	-329246	0.208448	0.635918	1
T	NONO	ENSG00000147140.11	148	rs5936580	-596842	0.130185	0.63688	1
N	ENAM	ENSG00000132464.7	19	rs7660770	-897485	0.310006	0.637501	1
N	RP11-571I18.4	ENSG00000272650.1	25	rs62325481	-399918	0.208237	0.638944	1
T	ITGB1BP2	ENSG00000147166.6	148	rs7879865	-753190	0.134316	0.639244	1
N	NOD2	ENSG00000167207.7	20	rs55881068	739887	0.335801	0.640701	1
N	CXorf65	ENSG00000204165.5	148	rs5936604	-175150	0.137472	0.643567	1
N	SULT1E1	ENSG00000109193.6	19	rs13133166	-76300	0.316057	0.644756	1
N	LUZP1	ENSG00000169641.9	31	rs7519889	-938011	0.172978	0.645283	1
N	ACAP1	ENSG00000072818.7	5	rs143094271	223253	0.346282	0.647276	1
N	TAF1	ENSG00000147133.11	148	rs6625693	-527424	0.131391	0.647961	1
T	TAF5	ENSG00000148835.9	8	rs9419958	548221	0.485458	0.648285	1
T	PNPLA2	ENSG00000177666.11	52	rs34725261	-586484	0.167321	0.648486	1
T	RP5-1071N3.1	ENSG00000231105.1	52	rs61778045	738811	0.138045	0.648662	1
T	AMIGO2	ENSG00000139211.5	155	rs7301001	-638650	0.20198	0.650076	1
N	LINC00324	ENSG00000178977.3	5	rs138420351	-423898	0.336409	0.650279	1
N	C1QB	ENSG00000173369.11	52	rs10917162	-499037	0.145132	0.651412	1
N	AP006621.1	ENSG00000177236.3	52	0	-579829	0.154894	0.65153	1
T	TRAPPC1	ENSG00000170043.7	5	0	-416024	0.328936	0.651857	1
T	RP5-916O11.2	ENSG00000255256.1	34	rs2553773	-910346	0.407831	0.653236	1
N	TPPP	ENSG00000171368.10	22	rs2853677	626310	0.112198	0.653247	1
N	SNORA26	ENSG00000212588.1	23	rs62325481	884248	0.219022	0.653407	1
N	CYB5D1	ENSG00000182224.7	5	rs78378222	-189313	0.334695	0.656417	1
N	FXR2	ENSG00000129245.7	5	rs143094271	-31447	0.334812	0.656777	1
T	C2orf50	ENSG00000150873.7	28	rs11686574	410827	0.165774	0.656844	1
N	IMMP1L	ENSG00000148950.5	163	rs742996	879046	0.0810072	0.660267	1
T	SULT1E1	ENSG00000109193.6	19	rs7660770	-79522	0.369227	0.660862	1
N	FOXO4	ENSG00000184481.12	148	rs6625693	-257357	0.146384	0.660997	1
N	PDCD6	ENSG00000249915.3	1	rs11742908	999246	0.668962	0.66114	1
N	ZBTB40	ENSG00000184677.12	52	rs2092315	-270661	0.144585	0.662997	1
T	DLG4	ENSG00000132535.14	5	rs78378222	478542	0.344761	0.663734	1
T	RP11-401P9.6	ENSG00000205414.1	20	rs17532886	829358	0.337741	0.66551	1
T	C17orf49	ENSG00000258315.1	5	rs138420351	782248	0.348569	0.666247	1
T	MGAT3	ENSG00000128268.11	32	rs4821942	864750	0.324187	0.668237	1
T	CCDC147-AS1	ENSG00000231233.1	8	rs7907606	-430718	0.513027	0.668321	1
N	SMARCE1P1	ENSG00000225215.1	30	rs227069	936127	0.207428	0.669863	1
T	SNORD83A	ENSG00000209482.1	30	rs112251865	954006	0.34283	0.669884	1
N	ZNF346-IT1	ENSG00000251666.1	72	rs244715	24847	0.393651	0.669996	1
T	EDA	ENSG00000158813.13	51	rs2281868	832551	0.344517	0.671185	1
T	CHID1	ENSG00000177830.13	52	rs3782121	-661423	0.189375	0.672278	1
N	XPNPEP3	ENSG00000196236.8	32	rs143521471	-613376	0.340967	0.673263	1
N	AC025335.1	ENSG00000179859.7	5	rs78378222	-244891	0.349623	0.673741	1
T	FBXO39	ENSG00000177294.6	4	0	899128	0.475822	0.676072	1
T	EHF	ENSG00000135373.8	34	rs2732544	450310	0.419346	0.676324	1
T	SULT1B1	ENSG00000173597.4	19	rs35487626	60897	0.367743	0.678172	1
T	RN7SL129P	ENSG00000241708.2	4	0	-871565	0.368756	0.678198	1
T	LINC00324	ENSG00000178977.3	5	rs78378222	-552209	0.369475	0.678376	1
N	LPIN1	ENSG00000134324.7	28	0	-133757	0.192674	0.678652	1
T	NSD1	ENSG00000165671.14	72	rs244716	-57158	0.43041	0.678814	1
N	SHBG	ENSG00000129214.10	5	rs138420351	182680	0.363696	0.678852	1
T	AC137527.2	ENSG00000261047.1	20	rs11649472	179982	0.345179	0.680162	1
N	GABARAP	ENSG00000170296.5	5	0	435337	0.371403	0.680245	1
T	RP11-1099M24.8	ENSG00000262492.1	5	rs78378222	-286435	0.354904	0.680596	1
N	SUDS3P1	ENSG00000249129.1	48	rs184784	-958089	0.406806	0.681326	1
N	CSTF3	ENSG00000176102.7	167	rs3858445	-656099	0.0828344	0.683363	1
T	SLC12A7	ENSG00000113504.15	22	rs33961405	227077	0.135489	0.683855	1
T	NEURL4	ENSG00000215041.5	5	0	359723	0.364829	0.684124	1
N	GREB1	ENSG00000196208.9	28	rs10929757	28418	0.195843	0.685057	1
N	CTD-3080P12.3	ENSG00000249201.2	22	rs11742908	97726	0.127234	0.686136	1
T	LINC00570	ENSG00000224177.2	28	rs4668732	182811	0.179477	0.687613	1
N	EFCAB4A	ENSG00000177685.12	52	rs7103852	-628588	0.166567	0.688019	1
T	NBPF3	ENSG00000142794.14	52	rs61768001	699198	0.158788	0.689453	1
N	RP1-101K10.6	ENSG00000227627.1	65	rs75510204	-712206	0.0929066	0.693992	1
N	ATM	ENSG00000149311.13	88	rs11212674	265608	0.191714	0.694942	1
N	RNU2-13P	ENSG00000251718.1	28	rs4668732	15598	0.192264	0.695336	1
N	RP11-327F22.1	ENSG00000260929.1	20	rs55881068	692580	0.37107	0.69605	1
N	NOP16	ENSG00000048162.15	72	rs2292256	522176	0.393652	0.696385	1
N	BRD9	ENSG00000028310.13	22	rs33961405	427170	0.129922	0.697332	1
T	SLC38A1	ENSG00000111371.11	155	rs9669403	222053	0.234142	0.697684	1
N	NKD1	ENSG00000140807.4	20	rs11649472	875706	0.380452	0.699167	1
N	RPLP2	ENSG00000177600.4	52	rs73386631	-607631	0.170954	0.699941	1
N	C1QA	ENSG00000173372.12	52	rs10917162	-482781	0.161704	0.701097	1
T	RP11-143M1.2	ENSG00000225655.1	71	rs2296055	604252	0.117691	0.702699	1
N	SENP3-EIF4A1	ENSG00000265500.1	5	rs138420351	233458	0.399375	0.702852	1
N	AP006621.6	ENSG00000255142.1	52	rs11245997	-576966	0.175699	0.705303	1
N	AL031594.1	ENSG00000252124.1	32	rs4821942	-205962	0.364832	0.706233	1
T	SLC25A22	ENSG00000177542.6	52	rs3782121	-584541	0.194208	0.706598	1
T	CUL5	ENSG00000166266.9	88	rs73006226	193268	0.20926	0.707753	1
N	RP11-23J18.1	ENSG00000258352.1	155	rs7486596	-709673	0.23771	0.709685	1
N	RPL4P6	ENSG00000230071.2	32	rs12484951	-279630	0.371113	0.713033	1
N	RP3-333H23.8	ENSG00000224794.1	29	rs12628042	951522	0.39161	0.713879	1
T	AP006621.5	ENSG00000255284.1	52	rs11246002	-566132	0.196799	0.714485	1
T	CLPTM1L	ENSG00000049656.9	22	rs11742908	-46877	0.150091	0.717011	1
N	HES7	ENSG00000179111.4	5	rs138420351	-323846	0.367367	0.717949	1
T	KANK1	ENSG00000107104.14	71	rs2296055	206662	0.129275	0.71851	1
N	KRT8P13	ENSG00000241416.1	82	rs16847897	-645301	0.28316	0.719576	1
T	SLC25A35	ENSG00000125434.6	5	rs138420351	-491019	0.39024	0.720323	1
N	PRKCI	ENSG00000163558.8	82	rs13069553	-431882	0.28052	0.721979	1
T	TNFSF12	ENSG00000239697.6	5	rs138420351	247854	0.398992	0.722781	1
T	PDHX	ENSG00000110435.7	34	rs675970	152967	0.47216	0.72294	1
N	CTD-2545G14.7	ENSG00000262526.2	5	rs143094271	319355	0.413025	0.723261	1
N	KANK1	ENSG00000107104.14	71	rs10975803	210293	0.121558	0.724208	1
T	RP3-408N23.4	ENSG00000230769.1	32	rs12628042	-544266	0.365184	0.724213	1
T	RAP2C	ENSG00000123728.5	215	rs5930556	-625	0.132607	0.725008	1
N	RGCC	ENSG00000102760.12	165	rs9532583	-775223	0.196674	0.725048	1
N	Y_RNA	ENSG00000200855.1	88	rs11607588	50515	0.213652	0.725774	1
T	SORCS3	ENSG00000156395.8	8	rs9419958	-724914	0.549362	0.726568	1
T	RPL26	ENSG00000161970.8	5	rs78378222	-709087	0.392488	0.726758	1
T	AP003027.1	ENSG00000203334.3	88	rs59021565	-828539	0.203479	0.727215	1
N	SLC7A14	ENSG00000013293.5	82	rs12489230	-618552	0.276389	0.728428	1
T	DDX10	ENSG00000178105.5	88	rs59021565	-535846	0.218257	0.729825	1
N	EFNB3	ENSG00000108947.4	5	rs138420351	91542	0.416163	0.731074	1
T	GRK6	ENSG00000198055.6	72	rs244715	-326643	0.482759	0.732495	1
N	RP11-589P10.5	ENSG00000262089.1	5	rs138420351	802101	0.408599	0.734029	1
N	ARHGEF15	ENSG00000198844.6	5	0	-795920	0.413339	0.737614	1
N	FAM153C	ENSG00000204677.6	29	rs183686	-939305	0.469226	0.737861	1
T	CEND1	ENSG00000184524.5	52	rs11246001	-576206	0.202305	0.738083	1
T	FOXO4	ENSG00000184481.12	148	rs5937000	-268260	0.17097	0.738379	1
N	TNRC6B	ENSG00000100354.16	32	rs17332320	270798	0.393215	0.739202	1
N	EXOC3	ENSG00000180104.11	22	rs2853676	845273	0.148228	0.74026	1
T	RP1-4G17.5	ENSG00000262302.1	5	rs78378222	421603	0.412538	0.741372	1
N	RP11-844P9.3	ENSG00000251667.1	72	rs149307	736524	0.438669	0.743317	1
T	SFR1	ENSG00000156384.10	8	rs11813268	-199521	0.572347	0.744424	1
T	MIR4766	ENSG00000266594.1	32	rs11089974	-666280	0.377282	0.74569	1
N	CWF19L2	ENSG00000152404.11	24	rs73006226	875656	0.267738	0.745964	1
N	EP300	ENSG00000100393.9	32	rs17332320	-776171	0.383365	0.746202	1
T	MKL1	ENSG00000196588.10	32	rs12484951	-103211	0.392814	0.746792	1
N	RGS14	ENSG00000169220.13	72	rs244715	-281276	0.443581	0.74759	1
N	B4GALT7	ENSG00000027847.9	72	rs149307	-555511	0.43	0.748247	1
N	ZDHHC11	ENSG00000188818.8	22	rs2853676	578075	0.149702	0.748721	1
N	FAM83F	ENSG00000133477.12	32	rs8135487	236103	0.397844	0.749929	1
T	NLGN2	ENSG00000169992.5	5	rs138420351	391869	0.419118	0.751719	1
T	SNORA67	ENSG00000264772.2	5	0	102526	0.419777	0.752654	1
T	CALHM2	ENSG00000138172.6	8	rs11813268	475752	0.592151	0.753175	1
T	SMARCE1P1	ENSG00000225215.1	30	rs227069	936127	0.249417	0.753951	1
T	RANGAP1	ENSG00000100401.15	8	rs12484951	-938541	0.494839	0.754028	1
T	ACADVL	ENSG00000072778.15	5	0	458226	0.429705	0.754303	1
T	PDLIM7	ENSG00000196923.9	72	rs251848	-417839	0.498756	0.7546	1
T	TMEM88	ENSG00000167874.6	5	0	-179713	0.410117	0.754792	1
T	TNFSF13	ENSG00000161955.12	5	rs78378222	110142	0.424452	0.756161	1
T	RP11-713H12.1	ENSG00000244604.1	3	0	-885878	0.426455	0.756167	1
N	UGT2A1	ENSG00000173610.7	19	rs2202282	180305	0.396514	0.756888	1
T	CLTB	ENSG00000175416.8	72	rs244715	684106	0.486351	0.757208	1
N	CLPTM1L	ENSG00000049656.9	22	rs56023411	-26120	0.152631	0.757231	1
T	SLC13A5	ENSG00000141485.11	4	rs143094271	875069	0.525331	0.758585	1
N	FAM193B	ENSG00000146067.11	72	0	-595460	0.465963	0.759212	1
T	RPL17P51	ENSG00000271429.1	166	rs9532631	650974	0.185081	0.760389	1
N	SCFD2	ENSG00000184178.11	25	rs62323682	811024	0.28352	0.761427	1
T	RP11-362K14.5	ENSG00000269984.1	82	rs16854335	-33410	0.290583	0.761436	1
T	FBXO5	ENSG00000112029.5	65	rs9383979	-736232	0.120207	0.762029	1
T	RAB39A	ENSG00000179331.2	88	rs59021565	200677	0.247657	0.763114	1
N	LINC00570	ENSG00000224177.2	28	rs9287732	174725	0.228418	0.763404	1
T	RP11-416N2.3	ENSG00000226431.1	8	rs2488002	370508	0.59708	0.763505	1
N	RP3-496C20.1	ENSG00000261202.1	32	rs1807579	89147	0.415884	0.763928	1
T	RP11-493L12.4	ENSG00000258181.1	155	rs2897968	-878222	0.265263	0.765197	1
N	SNX20	ENSG00000167208.10	20	rs62041991	770963	0.436959	0.765313	1
N	EPHB2	ENSG00000133216.12	52	rs1014987	-538509	0.193331	0.768083	1
T	RP11-368I23.2	ENSG00000242268.2	82	rs1920120	881025	0.305245	0.768251	1
N	FGFR4	ENSG00000160867.10	72	rs244716	-11019	0.469012	0.7687	1
N	RP11-43F13.1	ENSG00000188002.6	22	rs2736099	-311696	0.153395	0.769082	1
T	RBX1	ENSG00000100387.8	32	rs73165039	-812200	0.407694	0.769542	1
T	CTD-2228K2.5	ENSG00000188242.4	22	rs2853676	822307	0.162267	0.76975	1
T	TNK1	ENSG00000174292.8	5	rs138420351	416209	0.438181	0.770027	1
T	RP3-370M22.8	ENSG00000225528.1	32	rs4821942	361698	0.413723	0.771125	1
T	RP13-644M16.5	ENSG00000248763.2	19	rs2202282	702327	0.464843	0.771434	1
T	MYH10	ENSG00000133026.8	5	rs78378222	-805772	0.429845	0.771855	1
T	AC113189.5	ENSG00000233223.2	5	0	-67643	0.445261	0.772693	1
N	CTD-2228K2.7	ENSG00000225138.3	22	rs7734992	806776	0.158353	0.777052	1
T	WBP4	ENSG00000120688.7	166	rs9532631	-185674	0.194438	0.777407	1
T	ATP1B2	ENSG00000129244.4	5	rs78378222	21806	0.443745	0.777426	1
T	MXD3	ENSG00000213347.6	72	0	-377133	0.536013	0.778649	1
T	SIMC1	ENSG00000170085.13	72	0	685964	0.509842	0.778734	1
N	CCDC170	ENSG00000120262.8	64	rs6904757	777936	0.123392	0.778777	1
N	ELF1	ENSG00000120690.9	166	rs9532583	-249584	0.194517	0.779815	1
T	ARL10	ENSG00000175414.6	72	rs547798	534249	0.512377	0.780179	1
N	RPL17P51	ENSG00000271429.1	166	rs9532580	445497	0.19768	0.780239	1
N	UTP3	ENSG00000132467.2	13	rs7660770	-957220	0.434948	0.780575	1
T	AC027763.2	ENSG00000215067.5	5	rs143094271	683147	0.44412	0.7808	1
T	KBTBD6	ENSG00000165572.6	166	rs2701861	-559708	0.189286	0.783506	1
N	TNFSF12-TNFSF13	ENSG00000248871.1	5	rs78378222	119335	0.447543	0.783593	1
T	RP11-844P9.3	ENSG00000251667.1	72	rs35977534	600164	0.518053	0.785187	1
T	TNFSF12-TNFSF13	ENSG00000248871.1	5	rs78378222	119335	0.441043	0.785608	1
T	RP11-165F24.2	ENSG00000235330.2	71	rs35469085	329161	0.1572	0.786644	1
N	RP11-165F24.3	ENSG00000227155.3	71	rs4742448	372280	0.151996	0.787335	1
T	WDR96	ENSG00000197748.8	8	0	-202015	0.638961	0.788545	1
N	MRPL36	ENSG00000171421.8	22	rs33961405	-520924	0.165096	0.790954	1
N	TMEM256	ENSG00000205544.3	5	rs78378222	265457	0.454193	0.792086	1
T	RP11-352M15.1	ENSG00000257657.2	143	rs10880961	889573	0.338759	0.792849	1
T	NT5C2	ENSG00000076685.14	8	rs7907606	834691	0.614567	0.792872	1
T	KDM1A	ENSG00000004487.11	52	rs41307810	-991897	0.201035	0.793525	1
N	snoU13	ENSG00000238887.1	32	rs4821936	-678374	0.449615	0.794842	1
T	CLEC10A	ENSG00000132514.9	5	rs138420351	722206	0.447517	0.795158	1
N	RP5-1091N2.9	ENSG00000228427.1	148	rs5980712	-669461	0.194839	0.796913	1
T	ALKBH8	ENSG00000137760.10	87	rs74911261	983684	0.268237	0.798265	1
T	SCARNA21	ENSG00000252835.1	5	rs138420351	-109378	0.483146	0.799633	1
T	SNORD10	ENSG00000238917.1	5	rs78378222	91622	0.470595	0.800171	1
N	PDZD11	ENSG00000120509.6	148	rs5981021	598341	0.203905	0.800598	1
N	CTD-2245E15.3	ENSG00000251532.1	22	rs7725218	-261809	0.169407	0.802812	1
T	PER1	ENSG00000179094.9	5	rs78378222	-472039	0.467904	0.802882	1
N	RP11-130C19.1	ENSG00000229875.1	71	rs10115078	142066	0.165773	0.803644	1
T	TPPP	ENSG00000171368.10	22	rs2736099	626456	0.179314	0.803999	1
T	SYNE1	ENSG00000131018.18	65	rs7742927	187360	0.130207	0.804438	1
N	RP11-493L12.4	ENSG00000258181.1	155	rs12230643	-692703	0.311178	0.807234	1
N	CNTROB	ENSG00000170037.9	5	0	-256749	0.470821	0.808002	1
N	RP11-225H22.7	ENSG00000273485.1	8	rs11813268	472342	0.517414	0.808471	1
T	RP11-130C19.1	ENSG00000229875.1	71	rs1323267	141615	0.167768	0.808904	1
T	RP11-225H22.4	ENSG00000234699.1	8	0	475028	0.64524	0.808921	1
T	CTC1	ENSG00000178971.9	5	rs138420351	-430129	0.479574	0.809005	1
T	RASL11B	ENSG00000128045.5	25	rs62325482	735963	0.30914	0.809132	1
T	ZMYM3	ENSG00000147130.10	148	rs4531218	-405144	0.216191	0.812068	1
T	RP11-43F13.1	ENSG00000188002.6	22	rs2853676	-310489	0.178531	0.812081	1
N	SLC16A11	ENSG00000174326.7	5	rs138420351	755113	0.473082	0.812492	1
T	RP11-143M1.3	ENSG00000227917.1	71	rs4742415	700901	0.162431	0.812774	1
T	DLG3	ENSG00000082458.7	148	rs7059898	484366	0.214498	0.815849	1
N	PFAS	ENSG00000178921.9	5	0	-572266	0.483295	0.81613	1
T	NOP16	ENSG00000048162.15	72	rs6861925	513779	0.563403	0.817215	1
N	CTD-2301A4.3	ENSG00000240729.1	72	rs244718	-189612	0.515762	0.817774	1
N	PNPLA2	ENSG00000177666.11	52	rs1212931	-586805	0.234792	0.818743	1
N	EDA	ENSG00000158813.13	51	rs5980712	898037	0.474808	0.818824	1
T	RNU6-1025P	ENSG00000222561.1	52	rs11246001	-737523	0.24622	0.819939	1
N	ACADVL	ENSG00000072778.15	5	0	458226	0.472256	0.820695	1
N	RP11-469J4.3	ENSG00000242578.1	82	rs7610569	-665478	0.362847	0.821039	1
T	RP11-327F22.1	ENSG00000260929.1	20	rs12325192	713307	0.459081	0.821985	1
T	PDCD11	ENSG00000148843.9	8	rs9419958	519540	0.670583	0.824568	1
T	SLC16A11	ENSG00000174326.7	5	rs78378222	626802	0.488779	0.825954	1
N	UIMC1	ENSG00000087206.12	72	rs547798	-5286	0.523248	0.82733	1
T	MIEF1	ENSG00000100335.8	32	rs4821936	737072	0.475745	0.829268	1
N	CDC42	ENSG00000070831.11	52	rs72665317	-12048	0.229172	0.82992	1
T	RP11-819C21.1	ENSG00000261098.1	22	rs228595	922734	0.339841	0.831148	1
T	LMAN2	ENSG00000169223.10	72	rs6861925	-433835	0.576623	0.831567	1
T	LDLRAD2	ENSG00000187942.7	52	rs41307810	215286	0.221055	0.832064	1
N	RP11-199F11.2	ENSG00000262251.1	5	rs143094271	-125477	0.510686	0.832936	1
N	KDM1A	ENSG00000004487.11	52	rs10737462	-900967	0.228841	0.834273	1
N	SNORA67	ENSG00000264772.2	5	rs78378222	95607	0.516873	0.834553	1
N	ZBTB2	ENSG00000181472.4	62	rs75510204	907427	0.14861	0.835219	1
N	DLG4	ENSG00000132535.14	5	rs138420351	606853	0.501256	0.835517	1
N	RP11-96H19.1	ENSG00000257261.1	155	rs7301001	53378	0.333977	0.835671	1
N	RP11-225H22.4	ENSG00000234699.1	8	rs4387287	465293	0.555514	0.836746	1
N	RBX1	ENSG00000100387.8	32	rs12484951	-644277	0.486066	0.837723	1
N	TSPAN17	ENSG00000048140.13	72	rs244715	429174	0.53388	0.838689	1
T	RP11-96H19.1	ENSG00000257261.1	155	rs73101378	100814	0.324885	0.839439	1
T	CHRNB1	ENSG00000170175.6	5	rs78378222	223371	0.517334	0.839808	1
N	MIR497HG	ENSG00000267532.2	5	rs138420351	780925	0.505354	0.84065	1
T	RP11-89B16.1	ENSG00000249706.1	25	rs55732414	-300666	0.331648	0.840893	1
N	CTD-2228K2.5	ENSG00000188242.4	22	rs72709458	817515	0.196034	0.841186	1
T	RGS14	ENSG00000169220.13	72	rs353495	-354116	0.593136	0.841343	1
N	LMAN2	ENSG00000169223.10	72	rs251848	-266007	0.541968	0.841494	1
N	MTRF1L	ENSG00000112031.11	65	rs73781102	-769513	0.143861	0.842726	1
N	ARID2	ENSG00000189079.11	155	rs12230643	825756	0.333988	0.843072	1
T	TERC	ENSG00000270141.2	82	rs67795055	47586	0.375595	0.844371	1
T	LRRC34	ENSG00000171757.11	82	rs34194057	38334	0.360526	0.84499	1
N	AC011994.1	ENSG00000265583.1	28	rs11674184	-25996	0.305757	0.847329	1
N	ALOX12P2	ENSG00000262943.3	5	rs78378222	814571	0.501451	0.847511	1
T	HES7	ENSG00000179111.4	5	0	-445238	0.490741	0.847649	1
N	DVL2	ENSG00000004975.7	5	rs78378222	443091	0.541576	0.847821	1
N	TERC	ENSG00000270141.2	82	rs6789970	89501	0.374597	0.848056	1
N	RP11-849F2.9	ENSG00000269947.1	5	rs143094271	-717980	0.521107	0.851121	1
T	RP11-416N2.4	ENSG00000273108.1	8	rs2488002	310964	0.682267	0.85117	1
N	RP11-379K17.12	ENSG00000268220.1	82	rs7647824	-253218	0.380867	0.852254	1
T	MCHR1	ENSG00000128285.4	32	0	-520310	0.501402	0.852334	1
N	C6orf211	ENSG00000146476.6	63	rs75510204	819257	0.152861	0.85285	1
N	NDUFS6	ENSG00000145494.7	22	rs2853677	-514321	0.203187	0.853762	1
N	RP11-3K16.2	ENSG00000242795.2	82	rs34194057	218252	0.395407	0.854277	1
T	RNF44	ENSG00000146083.7	72	rs244715	549864	0.602373	0.854292	1
N	FAM153B	ENSG00000182230.7	67	rs353495	943030	0.617431	0.854633	1
T	RP11-327F22.6	ENSG00000270120.1	20	rs11642312	717856	0.506675	0.855362	1
N	NKD2	ENSG00000145506.9	22	rs6554754	288313	0.199986	0.855533	1
N	UNC5A	ENSG00000113763.6	72	rs251846	240769	0.567772	0.855876	1
N	RAB24	ENSG00000169228.9	72	rs547798	-401479	0.545412	0.856278	1
N	OGT	ENSG00000147162.9	118	rs5936580	-846733	0.246725	0.856445	1
T	AC025335.1	ENSG00000179859.7	5	rs138420351	-116580	0.543121	0.857528	1
N	UQCRFS1P1	ENSG00000226085.2	32	rs112251865	393931	0.513557	0.858363	1
N	MIR3115	ENSG00000263793.1	37	rs2179378	-872034	0.302619	0.858711	1
T	AHRR	ENSG00000063438.12	22	rs10069690	975498	0.219579	0.85877	1
T	FAM83F	ENSG00000133477.12	32	rs12484776	261919	0.501785	0.858869	1
T	GPS2	ENSG00000132522.11	5	rs138420351	485419	0.533029	0.858919	1
N	RNU6-1327P	ENSG00000202172.1	71	rs11790408	317591	0.189966	0.859087	1
T	RP11-259O2.1	ENSG00000248994.1	22	rs2853676	-645431	0.221833	0.861473	1
N	RP11-401P9.6	ENSG00000205414.1	20	rs55881068	827414	0.541108	0.861527	1
N	IGBP1	ENSG00000089289.11	148	rs4379599	664925	0.250285	0.863012	1
N	RP11-1277A3.2	ENSG00000246596.2	72	rs183686	-551959	0.586878	0.863752	1
T	SUDS3P1	ENSG00000249129.1	48	rs353496	-968420	0.670987	0.864572	1
N	KIF4A	ENSG00000090889.10	148	rs7059898	639198	0.248729	0.865789	1
N	RPL21P44	ENSG00000229585.4	25	rs62325481	-389090	0.370131	0.867226	1
T	SOCS5P4	ENSG00000227536.1	148	rs5980704	-580398	0.253838	0.867966	1
N	EIF3M	ENSG00000149100.8	167	rs11031749	-217783	0.145176	0.869364	1
N	KIT	ENSG00000157404.11	15	rs66529708	-942096	0.437095	0.86937	1
N	RP3-443C4.2	ENSG00000233823.1	65	rs75510204	458268	0.17435	0.87009	1
N	SLC16A13	ENSG00000174327.6	5	0	639276	0.552041	0.871526	1
N	NAA16	ENSG00000172766.14	165	rs9549252	-655201	0.290621	0.871663	1
T	ACTRT3	ENSG00000184378.2	82	rs16854335	-23139	0.396704	0.872063	1
N	snoU13	ENSG00000238651.1	165	rs6563841	-514940	0.297056	0.872153	1
N	PDCD11	ENSG00000148843.9	8	rs1265164	518448	0.572139	0.873297	1
T	PAMR1	ENSG00000149090.7	34	rs2732544	-360420	0.639116	0.87395	1
N	HIGD2A	ENSG00000146066.2	72	rs547798	510972	0.597835	0.874799	1
N	NOL10	ENSG00000115761.11	24	rs7582396	953456	0.414147	0.874968	1
N	MYNN	ENSG00000085274.11	82	rs4955676	77872	0.41303	0.876566	1
T	SLC25A17	ENSG00000100372.10	32	rs1807579	-637415	0.528596	0.876712	1
T	ADSL	ENSG00000239900.7	32	rs4821939	-83257	0.530148	0.880045	1
T	RP11-199F11.2	ENSG00000262251.1	5	rs143094271	-125477	0.562135	0.880221	1
T	ZBTB2	ENSG00000181472.4	62	rs6927162	873370	0.186648	0.880544	1
T	CLDN11	ENSG00000013297.6	82	rs1920116	-556683	0.407129	0.881362	1
N	SLC38A2	ENSG00000134294.9	155	rs4768737	238314	0.371326	0.882756	1
N	HSPG2	ENSG00000142798.12	52	rs10917162	331480	0.262726	0.885084	1
N	GSTO1	ENSG00000148834.8	8	0	-307483	0.628749	0.890308	1
T	RP11-143M1.7	ENSG00000144140.5	71	rs4742448	774132	0.212637	0.891885	1
T	AURKB	ENSG00000178999.8	5	rs143094271	-644955	0.57944	0.893413	1
T	RP11-698N11.4	ENSG00000261355.1	34	rs2732552	-751291	0.659315	0.894571	1
T	CYCSP34	ENSG00000176268.5	166	rs7323267	-233721	0.286263	0.894627	1
N	DBN1	ENSG00000113758.9	72	rs251848	-391053	0.596894	0.894659	1
T	FAM153C	ENSG00000204677.6	29	rs353467	-987709	0.700943	0.895456	1
N	PDLIM7	ENSG00000196923.9	72	0	-559066	0.606669	0.896126	1
T	GABARAP	ENSG00000170296.5	5	rs78378222	428418	0.586586	0.896205	1
N	CNNM2	ENSG00000148842.13	4	rs9419958	997895	0.775222	0.897457	1
T	FGFR4	ENSG00000160867.10	72	rs184784	-73659	0.675344	0.898434	1
T	ASGR2	ENSG00000161944.12	5	rs138420351	695421	0.562677	0.898666	1
T	ENTHD1	ENSG00000176177.9	32	rs17332320	572570	0.557528	0.899496	1
N	ITGB1BP2	ENSG00000147166.6	148	rs1543568	-844841	0.278576	0.900911	1
N	RANGAP1	ENSG00000100401.15	8	rs4821942	-923516	0.689595	0.90169	1
N	CHIC2	ENSG00000109220.6	25	rs62325481	-412292	0.43195	0.902195	1
T	AC096559.1	ENSG00000224184.1	28	rs6432220	-278033	0.35296	0.902457	1
N	ZBTB4	ENSG00000174282.7	5	rs143094271	100416	0.596259	0.903084	1
T	AL031594.1	ENSG00000252124.1	32	rs4821942	-205962	0.563513	0.903269	1
N	DLG3	ENSG00000082458.7	148	rs4844246	196222	0.277124	0.903832	1
T	RP3-496C20.1	ENSG00000261202.1	32	rs17332320	272547	0.55972	0.904429	1
N	SLC35F2	ENSG00000110660.10	88	rs74911261	695419	0.352289	0.906326	1
T	TMEM102	ENSG00000181284.2	5	0	239908	0.59672	0.907686	1
T	DDX41	ENSG00000183258.7	72	0	-587249	0.692536	0.908524	1
T	ATF4	ENSG00000128272.10	32	rs11089973	619956	0.580179	0.90897	1
T	B4GALT7	ENSG00000027847.9	72	rs244715	-523539	0.678619	0.909703	1
T	SUGT1P3	ENSG00000239827.4	166	rs117245733	-758352	0.306158	0.91048	1
T	ELF1	ENSG00000120690.9	166	rs9549260	-251953	0.28893	0.910618	1
T	C6orf211	ENSG00000146476.6	63	rs28385620	884951	0.205169	0.912969	1
N	WT1	ENSG00000184937.8	167	rs11031736	-37568	0.172326	0.913837	1
N	RP11-530N7.2	ENSG00000262503.1	5	0	586848	0.63926	0.914094	1
N	RP11-1277A3.1	ENSG00000247679.2	72	rs244716	-535386	0.64649	0.915659	1
T	ST13	ENSG00000100380.8	32	rs17332320	-508920	0.592407	0.916578	1
N	ESR1	ENSG00000091831.17	65	rs36019875	650126	0.19411	0.917114	1
N	C17orf49	ENSG00000258315.1	5	rs78378222	653937	0.617951	0.917194	1
T	SENP3-EIF4A1	ENSG00000265500.1	5	rs138420351	233458	0.605229	0.917328	1
T	UNGP1	ENSG00000260818.2	20	rs11645416	148903	0.599121	0.917409	1
T	INA	ENSG00000148798.5	8	0	650711	0.771943	0.919319	1
T	PRKCI	ENSG00000163558.8	82	rs4955575	-405616	0.466406	0.920377	1
T	SHBG	ENSG00000129214.10	5	0	-99743	0.626055	0.921264	1
T	Y_RNA	ENSG00000200855.1	88	rs751343	410808	0.372064	0.921493	1
N	RP11-401P9.5	ENSG00000260249.2	20	rs66998222	781473	0.624853	0.921873	1
N	GPRIN1	ENSG00000169258.6	72	rs251843	453302	0.642701	0.922364	1
N	RNU6-310P	ENSG00000207385.1	25	rs62323678	409711	0.455341	0.922512	1
N	HS6ST1P1	ENSG00000187952.8	52	rs12410251	727832	0.308339	0.922555	1
N	PHC3	ENSG00000173889.11	82	rs12630450	-324317	0.487692	0.922568	1
T	CTD-2301A4.3	ENSG00000240729.1	72	rs244715	-188205	0.706618	0.922691	1
N	DNAJC24	ENSG00000170946.10	89	rs11031726	969464	0.220105	0.922756	1
N	RP11-327F22.2	ENSG00000261644.1	20	rs55881068	697777	0.632875	0.922768	1
T	RPL21P44	ENSG00000229585.4	25	rs62325483	-387894	0.445599	0.923055	1
N	GPS2	ENSG00000132522.11	5	rs138420351	485419	0.606552	0.923493	1
N	RPL3	ENSG00000100316.11	30	rs8135487	918169	0.61442	0.923912	1
N	GRK6	ENSG00000198055.6	72	rs244715	-326643	0.656633	0.92399	1
N	AP003027.1	ENSG00000203334.3	88	rs73006226	-755718	0.369547	0.924781	1
N	RP11-379K17.9	ENSG00000242583.1	82	rs12630450	-299829	0.49409	0.927933	1
N	RN7SL246P	ENSG00000265093.1	155	rs2045556	405620	0.447583	0.927993	1
N	CUL5	ENSG00000166266.9	88	rs4753835	265789	0.379338	0.928276	1
N	MKL1	ENSG00000196588.10	32	rs1807579	-278066	0.61929	0.92842	1
T	SLK	ENSG00000065613.9	8	0	-39328	0.797424	0.931266	1
N	RN7SKP268	ENSG00000223039.1	43	rs75510204	951909	0.247499	0.932498	1
T	NAA16	ENSG00000172766.14	165	rs9532583	-628869	0.360462	0.932646	1
T	FJX1	ENSG00000179431.5	34	rs2732547	-551053	0.726469	0.933304	1
T	CLDN7	ENSG00000181885.14	5	rs143094271	299879	0.631547	0.934094	1
N	PQLC3	ENSG00000162976.8	28	rs11674184	426210	0.399331	0.934895	1
N	PCGF6	ENSG00000156374.10	8	rs4387287	615343	0.694094	0.935465	1
T	XPNPEP3	ENSG00000196236.8	32	rs8136269	-720638	0.631646	0.935954	1
N	RP11-327F22.6	ENSG00000270120.1	20	rs55881068	720646	0.649217	0.936182	1
T	CTDNEP1	ENSG00000175826.7	5	rs78378222	424841	0.64164	0.936196	1
T	KDM6B	ENSG00000132510.6	5	rs78378222	-171471	0.668385	0.936745	1
N	SEC62	ENSG00000008952.12	82	rs67795055	-154529	0.493634	0.937065	1
T	SLC6A3	ENSG00000142319.14	22	rs7449190	-94992	0.285406	0.937643	1
N	QSER1	ENSG00000060749.10	167	rs7944182	-584050	0.203913	0.938028	1
T	RP11-130C19.3	ENSG00000227914.3	71	0	131314	0.270342	0.939406	1
N	AC135178.1	ENSG00000198150.2	5	rs138420351	-561669	0.660962	0.939633	1
N	TMEM102	ENSG00000181284.2	5	0	239908	0.67771	0.940311	1
N	NONO	ENSG00000147140.11	148	rs5936580	-596842	0.31853	0.94065	1
N	USP48	ENSG00000090686.11	52	rs41307810	349253	0.342225	0.941181	1
N	AC108456.1	ENSG00000221338.1	163	rs11031736	914736	0.210037	0.941408	1
N	RP11-423H2.1	ENSG00000170089.11	72	rs244718	-734253	0.698517	0.941506	1
T	AKAP12	ENSG00000131016.12	33	rs73005444	991032	0.430501	0.94169	1
N	NDEL1	ENSG00000166579.11	5	rs138420351	-616387	0.668719	0.941948	1
T	DNAH2	ENSG00000183914.10	5	rs78378222	-48921	0.649589	0.942269	1
T	RP11-225H22.7	ENSG00000273485.1	8	rs7907606	470678	0.840887	0.942691	1
N	LRRIQ4	ENSG00000188306.6	82	rs67795055	-9816	0.513218	0.94434	1
T	COG6	ENSG00000133103.12	92	rs9532563	930505	0.495146	0.944459	1
T	RP11-332O19.2	ENSG00000237827.1	8	rs11813268	797521	0.839264	0.947015	1
N	MED12	ENSG00000184634.11	148	rs6625693	-279716	0.347198	0.947122	1
N	RP5-1071N3.1	ENSG00000231105.1	52	rs56104760	866245	0.363401	0.947575	1
N	ZMYM3	ENSG00000147130.10	148	rs1325094	-614678	0.349181	0.948093	1
N	AC040977.1	ENSG00000269871.1	5	0	501711	0.685986	0.948406	1
N	WRAP53	ENSG00000141499.12	5	0	-171750	0.671466	0.949279	1
N	SYNGR1	ENSG00000100321.10	32	0	808514	0.665532	0.950173	1
T	HS6ST1P1	ENSG00000187952.8	52	rs3765350	692519	0.338033	0.950313	1
N	C11orf65	ENSG00000166323.8	88	rs117706999	227696	0.432065	0.952013	1
N	RP11-438E8.2	ENSG00000257368.2	100	rs2131371	957972	0.613733	0.952811	1
N	SLC25A15	ENSG00000102743.10	166	rs6563841	-124371	0.348782	0.953852	1
N	CHID1	ENSG00000177830.13	52	rs17156153	-596844	0.388222	0.954295	1
N	LINC00339	ENSG00000218510.3	52	rs12405695	14007	0.356992	0.956018	1
N	KCNAB3	ENSG00000170049.5	5	0	-246507	0.698536	0.956373	1
T	ESR1	ENSG00000091831.17	65	rs4870084	566122	0.243962	0.957105	1
T	CABS1	ENSG00000145309.5	19	rs12640488	-599946	0.711916	0.957268	1
N	C17orf59	ENSG00000196544.6	5	rs138420351	-391590	0.700912	0.95734	1
N	ELP4	ENSG00000109911.13	167	rs7105538	856621	0.219189	0.957742	1
T	RP11-104H15.10	ENSG00000272884.1	5	0	235845	0.685482	0.958122	1
T	ATM	ENSG00000149311.13	88	rs73006226	-20484	0.453647	0.960532	1
N	DDX41	ENSG00000183258.7	72	rs35977534	-603348	0.744613	0.962694	1
T	CAT	ENSG00000121691.4	34	rs2732552	624119	0.774428	0.962933	1
N	LSMD1	ENSG00000183011.9	5	0	-181333	0.71955	0.965527	1
T	SEC62	ENSG00000008952.12	82	rs12638862	-206918	0.581514	0.966984	1
T	LDLRAD3	ENSG00000179241.8	34	rs1895821	-876011	0.817198	0.968288	1
T	GAPDHP37	ENSG00000231907.2	32	rs1807579	-541269	0.696094	0.968543	1
T	RP11-849F2.9	ENSG00000269947.1	5	0	-602411	0.745903	0.969553	1
N	RP11-819C21.1	ENSG00000261098.1	22	rs73006241	906292	0.530849	0.970056	1
T	PCED1B-AS1	ENSG00000247774.2	155	rs7486915	-730460	0.53465	0.9702	1
N	SUGT1P3	ENSG00000239827.4	166	rs2755209	-344492	0.409456	0.970201	1
N	NBPF2P	ENSG00000227001.2	52	rs10917162	729100	0.431312	0.971243	1
N	UNGP1	ENSG00000260818.2	20	rs7193789	157445	0.727577	0.972024	1
N	LINC00938	ENSG00000273015.1	155	rs12816358	617135	0.560329	0.973412	1
T	RAB24	ENSG00000169228.9	72	rs547798	-401479	0.807212	0.973649	1
T	RP11-438E8.2	ENSG00000257368.2	100	rs9669403	960350	0.630633	0.973696	1
N	ATF4	ENSG00000128272.10	32	rs8135487	711356	0.732612	0.974474	1
T	KIT	ENSG00000157404.11	15	rs66604018	-973771	0.649874	0.975552	1
T	TMEM107	ENSG00000179029.10	5	rs78378222	-504804	0.752599	0.975718	1
N	MIR548S	ENSG00000265056.1	28	rs10929753	-237266	0.482688	0.976677	1
N	CALHM2	ENSG00000138172.6	8	rs2488002	472797	0.802232	0.977032	1
N	USMG5	ENSG00000173915.8	8	0	538833	0.799396	0.977463	1
N	HIPK3	ENSG00000110422.7	167	rs2207548	-909475	0.259058	0.978037	1
T	POLR2A	ENSG00000181222.10	5	0	29954	0.797216	0.980946	1
N	DMRT2	ENSG00000173253.10	71	rs10739107	-389504	0.345982	0.982334	1
N	NEURL	ENSG00000107954.6	8	rs11813268	428559	0.827849	0.983371	1
N	AC113189.5	ENSG00000233223.2	5	0	-67643	0.814887	0.9869	1
T	C9orf66	ENSG00000183784.5	71	rs114680331	602573	0.382132	0.986982	1
N	SH3PXD2A	ENSG00000107957.12	8	0	339346	0.850504	0.989075	1
N	RP11-368I23.2	ENSG00000242268.2	82	rs12630450	859049	0.688926	0.990151	1
N	SAT2	ENSG00000141504.7	5	0	-111913	0.830164	0.990554	1
N	ECE1	ENSG00000117298.10	52	rs72478520	945826	0.539778	0.995407	1
T	AC127904.2	ENSG00000230732.3	2	rs181414908	983208	1	1	1
T	NCBP2	ENSG00000114503.6	2	rs181414908	960756	1	1	1
T	NCBP2-AS2	ENSG00000270170.1	2	rs181414908	953535	1	1	1
T	PIGZ	ENSG00000119227.3	2	rs181414908	949815	1	1	1
T	MFI2	ENSG00000163975.7	2	rs181414908	907537	1	1	1
T	MFI2-AS1	ENSG00000228109.1	2	rs181414908	896698	1	1	1
T	DLG1	ENSG00000075711.16	2	rs181414908	853598	1	1	1
T	BDH1	ENSG00000161267.7	2	rs181414908	386375	1	1	1
T	AC024560.3	ENSG00000214135.4	2	rs181414908	317945	1	1	1
T	AC132008.1	ENSG00000213519.2	2	rs181414908	315814	1	1	1
T	AC024560.2	ENSG00000236833.1	2	rs181414908	235593	1	1	1
T	KIAA0226	ENSG00000145016.9	2	rs181414908	224765	1	1	1
T	FYTTD1	ENSG00000122068.8	2	rs181414908	158979	1	1	1
T	RP11-803P9.1	ENSG00000273375.1	2	rs181414908	106458	1	1	1
T	LRCH3	ENSG00000186001.8	2	rs181414908	104932	1	1	1
T	AC144530.1	ENSG00000234742.1	2	rs181414908	45758	1	1	1
T	IQCG	ENSG00000114473.9	2	rs181414908	7083	1	1	1
T	RPL35A	ENSG00000182899.10	2	rs181414908	-53829	1	1	1
T	LMLN	ENSG00000185621.7	2	rs181414908	-64042	1	1	1
T	ANKRD18DP	ENSG00000226435.6	2	rs181414908	-157364	1	1	1
T	FAM157A	ENSG00000236438.2	2	rs181414908	-256208	1	1	1
T	AC073135.7	ENSG00000226008.1	2	rs181414908	-332036	1	1	1
N	AC127904.2	ENSG00000230732.3	2	rs181414908	983208	1	1	1
N	NCBP2	ENSG00000114503.6	2	rs181414908	960756	1	1	1
N	NCBP2-AS1	ENSG00000225578.1	2	rs181414908	956281	1	1	1
N	NCBP2-AS2	ENSG00000270170.1	2	rs181414908	953535	1	1	1
N	PIGZ	ENSG00000119227.3	2	rs181414908	949815	1	1	1
N	MFI2	ENSG00000163975.7	2	rs181414908	907537	1	1	1
N	MFI2-AS1	ENSG00000228109.1	2	rs181414908	896698	1	1	1
N	DLG1	ENSG00000075711.16	2	rs181414908	853598	1	1	1
N	BDH1	ENSG00000161267.7	2	rs181414908	386375	1	1	1
N	AC024560.3	ENSG00000214135.4	2	rs181414908	317945	1	1	1
N	AC132008.1	ENSG00000213519.2	2	rs181414908	315814	1	1	1
N	AC024560.2	ENSG00000236833.1	2	rs181414908	235593	1	1	1
N	KIAA0226	ENSG00000145016.9	2	rs181414908	224765	1	1	1
N	FYTTD1	ENSG00000122068.8	2	rs181414908	158979	1	1	1
N	RP11-803P9.1	ENSG00000273375.1	2	rs181414908	106458	1	1	1
N	LRCH3	ENSG00000186001.8	2	rs181414908	104932	1	1	1
N	AC144530.1	ENSG00000234742.1	2	rs181414908	45758	1	1	1
N	IQCG	ENSG00000114473.9	2	rs181414908	7083	1	1	1
N	RPL35A	ENSG00000182899.10	2	rs181414908	-53829	1	1	1
N	LMLN	ENSG00000185621.7	2	rs181414908	-64042	1	1	1
N	RNU6-621P	ENSG00000201622.1	2	rs181414908	-98443	1	1	1
N	ANKRD18DP	ENSG00000226435.6	2	rs181414908	-157364	1	1	1
N	FAM157A	ENSG00000236438.2	2	rs181414908	-256208	1	1	1
N	AC073135.7	ENSG00000226008.1	2	rs181414908	-332036	1	1	1
T	RP11-724N1.1	ENSG00000272912.1	0	NA	NA	NA	NA	NA
T	ANO6	ENSG00000177119.11	0	NA	NA	NA	NA	NA
T	EIF4G3	ENSG00000075151.15	0	NA	NA	NA	NA	NA
T	EGFEM1P	ENSG00000206120.7	0	NA	NA	NA	NA	NA
T	SENP5	ENSG00000119231.6	0	NA	NA	NA	NA	NA
N	DCDC1	ENSG00000170959.10	0	NA	NA	NA	NA	NA
N	RP11-724N1.1	ENSG00000272912.1	0	NA	NA	NA	NA	NA
N	ANO6	ENSG00000177119.11	0	NA	NA	NA	NA	NA
N	SENP5	ENSG00000119231.6	0	NA	NA	NA	NA	NA
N	EGFEM1P	ENSG00000206120.7	0	NA	NA	NA	NA	NA
N	EIF4G3	ENSG00000075151.15	0	NA	NA	NA	NA	NA
