# Supplementary material for: Genetic predisposition to uterine leiomyoma is determined by loci for genitourinary development and genome stability
Source: eLife. 2018 Sep 18;7:e37110. doi: 10.7554/eLife.37110 (PMC6203434; doi:10.7554/eLife.37110)
Supplement: Supplementary file 5. — Tumors and myometrium normal tissues were analyzed separately. The association statistics are based on MatrixEQTL (details in the Methods section). [file elife-37110-supp5.xlsx]

## Sheet: meQTL_tumor_normal
Tissue	SNP	CpG	beta	t-stat	p-value	FDR	overlapping gene	CpG island	promoter	AA	AB	BB
tumor	5_176450837	5_176333126	-0.483902	-23.2471	8.46373e-30	1.19336e-24	UIMC1	no CpG island	no promoter	4	40	12
tumor	5_176450837	5_176434439	-0.490977	-18.6467	3.413e-25	2.40612e-20	UIMC1	no CpG island	no promoter	4	40	12
normal	5_176450837	5_176333126	-0.486995	-21.13	9.47972e-21	1.40718e-15	UIMC1	no CpG island	no promoter	2	22	11
normal	13_41179798	13_41189143	-0.412924	-19.8368	6.57184e-20	4.87765e-15	FOXO1	no CpG island	no promoter	15	16	4
tumor	6_152543949	6_152555112	-0.403883	-11.299	7.60661e-16	3.57503e-11	SYNE1	no CpG island	no promoter	24	30	2
normal	19_49267882	19_49375529	0.0517349	13.9958	1.96347e-15	9.71533e-11	no gene	known CpG island	PPP1R15A	32	2	1
normal	5_176450837	5_176434439	-0.477064	-13.0851	1.30072e-14	4.82701e-10	UIMC1	no CpG island	no promoter	2	22	11
tumor	3_128122820	3_127935159	0.242958	8.6122	1.02666e-11	3.61892e-07	EEFSEC	no CpG island	no promoter	35	16	5
tumor	3_128122820	3_127820846	-0.299162	-8.33963	2.80292e-11	7.73505e-07	RUVBL1	no CpG island	no promoter	35	16	5
tumor	13_41179798	13_41189143	-0.333025	-8.29614	3.29158e-11	7.73505e-07	FOXO1	no CpG island	no promoter	28	23	5
tumor	3_128122820	3_127951248	0.243515	8.00279	9.76289e-11	1.96648e-06	EEFSEC	no CpG island	no promoter	35	16	5
normal	19_49267882	19_48968015	-0.163175	-9.225	1.17268e-10	3.48146e-06	KCNJ14	no CpG island	CTC-273B12.7	32	2	1
normal	19_49267882	19_48968015	-0.163175	-9.225	1.17268e-10	3.48146e-06	KCNJ14	no CpG island	CTC-273B12.6	32	2	1
tumor	2_11702661	2_11627409	-0.343673	-7.78855	2.16611e-10	3.81769e-06	no gene	no CpG island	no promoter	12	18	26
normal	6_152543949	6_152555112	-0.438862	-8.99435	2.14632e-10	5.31002e-06	SYNE1	no CpG island	no promoter	21	13	1
normal	3_128122820	3_127951248	0.280382	8.65201	5.33149e-10	1.13059e-05	EEFSEC	no CpG island	no promoter	20	10	5
tumor	5_1283755	5_1285974	-0.426647	-7.16687	2.2074e-09	3.45818e-05	TERT	no CpG island	no promoter	36	17	3
normal	19_49267882	19_48983936	0.056701	8.01082	3.04984e-09	3.52985e-05	CYTH2	known CpG island	CTC-273B12.8	32	2	1
normal	19_49267882	19_48983936	0.056701	8.01082	3.04984e-09	3.52985e-05	CTC-273B12.8	known CpG island	CTC-273B12.8	32	2	1
normal	19_49267882	19_49999785	0.0283505	8.01082	3.04984e-09	3.52985e-05	RPS11	known CpG island	RPS11	32	2	1
normal	19_49267882	19_49999785	0.0283505	8.01082	3.04984e-09	3.52985e-05	RPS11	known CpG island	SNORD35B	32	2	1
normal	19_49267882	19_50167926	0.0378007	8.01082	3.04984e-09	3.52985e-05	IRF3	known CpG island	BCL2L12	32	2	1
normal	19_49267882	19_49458274	0.0850515	8.01082	3.04984e-09	3.52985e-05	BAX	known CpG island	BAX	32	2	1
normal	19_49267882	19_49468557	0.1698	7.97909	3.32913e-09	3.52985e-05	no gene	known CpG island	FTL	32	2	1
normal	19_49267882	19_49611351	-0.06792	-7.97909	3.32913e-09	3.52985e-05	SNRNP70	known CpG island	no promoter	32	2	1
normal	19_49267882	19_49946929	0.0566	7.97909	3.32913e-09	3.52985e-05	no gene	known CpG island	no promoter	32	2	1
normal	19_49267882	19_50016556	0.339061	7.93426	3.76859e-09	3.72942e-05	FCGRT	known CpG island	no promoter	32	2	1
normal	5_176450837	5_176326721	-0.244847	-7.82016	5.17258e-09	4.79889e-05	no gene	no CpG island	no promoter	2	22	11
normal	19_49267882	19_49622058	0.0525672	7.75368	6.22488e-09	5.43546e-05	C19orf73	known CpG island	PPFIA3	32	2	1
tumor	3_169514585	3_170062593	-0.17741	-6.94766	5.01084e-09	7.06514e-05	no gene	no CpG island	RP11-543D10.2	25	23	8
normal	19_49267882	19_49458367	0.33677	7.58846	9.88514e-09	8.152e-05	BAX	known CpG island	BAX	32	2	1
normal	5_1283755	5_1285974	-0.461269	-7.4599	1.41967e-08	0.000110915	TERT	no CpG island	no promoter	18	14	3
normal	19_49267882	19_50145763	0.0772185	7.34748	1.95117e-08	0.000144816	SCAF1	known CpG island	SCAF1	32	2	1
tumor	9_684160	9_470653	-0.25452	-6.66272	1.45317e-08	0.00017226	RP11-165F24.3	no CpG island	KANK1	28	17	11
tumor	9_684160	9_470653	-0.25452	-6.66272	1.45317e-08	0.00017226	KANK1	no CpG island	KANK1	28	17	11
tumor	9_684160	9_419398	-0.206503	-6.66035	1.46608e-08	0.00017226	DOCK8	no CpG island	no promoter	28	17	11
normal	11_225196	11_797457	0.0477702	7.26065	2.49667e-08	0.00017648	SLC25A22	no CpG island	no promoter	30	5	0
tumor	5_176450837	5_176314638	0.385889	6.44431	3.28107e-08	0.000342734	HK3	known CpG island	no promoter	4	40	12
tumor	X_70149078	X_70324396	-0.243323	-6.42589	3.514e-08	0.000342734	CXorf65	no CpG island	no promoter	21	26	9
tumor	19_49267882	19_49141115	0.094146	6.41597	3.64619e-08	0.000342734	no gene	known CpG island	SEC1P	48	5	3
tumor	5_1286516	5_1277576	-0.289218	-6.35781	4.52708e-08	0.00039894	TERT	known CpG island	no promoter	7	29	20
normal	19_49267882	19_49666049	-0.107202	-6.76058	1.04773e-07	0.000706937	TRPM4	no CpG island	no promoter	32	2	1
normal	19_49267882	19_48685783	-0.075892	-6.67929	1.32567e-07	0.000855583	C19orf68	known CpG island	no promoter	32	2	1
normal	19_49267882	19_48685783	-0.075892	-6.67929	1.32567e-07	0.000855583	ZNF114	known CpG island	no promoter	32	2	1
normal	19_49267882	19_48685783	-0.075892	-6.67929	1.32567e-07	0.000855583	CARD8	known CpG island	no promoter	32	2	1
tumor	9_684160	9_470659	-0.224225	-6.04247	1.45775e-07	0.00120905	RP11-165F24.3	no CpG island	KANK1	28	17	11
tumor	9_684160	9_470659	-0.224225	-6.04247	1.45775e-07	0.00120905	KANK1	no CpG island	KANK1	28	17	11
tumor	2_11721535	2_11752918	0.293907	6.00842	1.65316e-07	0.00129495	GREB1	no CpG island	no promoter	25	23	8
normal	2_67090367	2_66802902	0.0639352	6.42785	2.75388e-07	0.00170329	AC007392.3	known CpG island	no promoter	31	4	0
tumor	3_128122820	3_127323830	0.28034	5.91131	2.36515e-07	0.00175515	MCM2	known CpG island	no promoter	35	16	5
normal	11_225196	11_379637	-0.516829	-6.38944	3.08049e-07	0.00182908	B4GALNT4	known CpG island	no promoter	30	5	0
tumor	19_49267882	19_49618326	0.0289382	5.87512	2.70222e-07	0.00190502	LIN7B	known CpG island	LIN7B	48	5	3
tumor	11_225196	11_487083	-0.113529	-5.84939	2.97046e-07	0.00199441	PTDSS2	no CpG island	no promoter	48	8	0
normal	19_49267882	19_49468650	0.139507	6.2291	4.92368e-07	0.00281106	FTL	known CpG island	FTL	32	2	1
normal	19_49267882	19_49990761	0.0526173	6.18269	5.641e-07	0.00310132	CTD-3148I10.15	known CpG island	RPL13A	32	2	1
normal	19_49267882	19_49956650	0.0536811	6.09651	7.2643e-07	0.00385114	PIH1D1	known CpG island	ALDH16A1	32	2	1
normal	19_49267882	19_49956650	0.0536811	6.09651	7.2643e-07	0.00385114	ALDH16A1	known CpG island	ALDH16A1	32	2	1
normal	X_70149078	X_70324396	-0.1846	-6.06245	8.02884e-07	0.00407781	CXorf65	no CpG island	no promoter	14	15	6
normal	19_49267882	19_48983934	0.055115	6.05356	8.24127e-07	0.00407781	CYTH2	known CpG island	CTC-273B12.8	32	2	1
normal	19_49267882	19_48983934	0.055115	6.05356	8.24127e-07	0.00407781	CTC-273B12.8	known CpG island	CTC-273B12.8	32	2	1
normal	3_128122820	3_127820846	-0.322311	-5.96905	1.05667e-06	0.00505976	RUVBL1	no CpG island	no promoter	20	10	5
tumor	9_684160	9_470661	-0.220908	-5.54692	8.98268e-07	0.00575696	RP11-165F24.3	no CpG island	KANK1	28	17	11
tumor	9_684160	9_470661	-0.220908	-5.54692	8.98268e-07	0.00575696	KANK1	no CpG island	KANK1	28	17	11
tumor	1_22450487	1_22456326	-0.123131	-5.50709	1.03826e-06	0.00636483	WNT4	no CpG island	no promoter	40	15	1
normal	19_49267882	19_49122417	0.0329897	5.84607	1.5179e-06	0.00704123	RPL18	known CpG island	SPHK2	32	2	1
tumor	19_49267882	19_49622339	0.0811281	5.45093	1.27289e-06	0.00747807	C19orf73	known CpG island	PPFIA3	48	5	3
tumor	9_684160	9_761497	-0.136737	-5.38803	1.59833e-06	0.0090144	no gene	no CpG island	no promoter	28	17	11
normal	11_107999907	11_107992040	0.0817719	5.71256	2.25042e-06	0.0101229	RP11-144G7.2	known CpG island	ACAT1	31	4	0
normal	19_49267882	19_49122375	0.0365878	5.69086	2.39924e-06	0.0104749	RPL18	known CpG island	SPHK2	32	2	1
normal	19_49267882	19_49217964	0.0614091	5.65488	2.6681e-06	0.0113159	MAMSTR	no CpG island	no promoter	32	2	1
normal	19_49267882	19_48825101	0.0455263	5.60381	3.1024e-06	0.0127923	CCDC114	known CpG island	EMP3	32	2	1
normal	19_49267882	19_48825101	0.0455263	5.60381	3.1024e-06	0.0127923	EMP3	known CpG island	EMP3	32	2	1
tumor	1_22450487	1_22936056	0.126751	5.25703	2.5624e-06	0.0138958	no gene	no CpG island	no promoter	40	15	1
normal	19_49267882	19_49654169	0.0810677	5.52841	3.87638e-06	0.0155517	PPFIA3	known CpG island	no promoter	32	2	1
normal	5_1286516	5_1285974	0.425799	5.47712	4.51056e-06	0.0176198	TERT	no CpG island	no promoter	6	22	7
tumor	9_815682	9_974781	0.216576	5.17074	3.49112e-06	0.0178808	no gene	no CpG island	no promoter	30	20	6
tumor	19_49267882	19_48491992	-0.0998583	-5.16599	3.55087e-06	0.0178808	BSPH1	no CpG island	no promoter	48	5	3
tumor	5_176450837	5_176314458	0.346702	5.13683	3.94072e-06	0.0191596	HK3	known CpG island	no promoter	4	40	12
normal	3_128122820	3_127935159	0.200118	5.42343	5.28598e-06	0.0197959	EEFSEC	no CpG island	no promoter	20	10	5
normal	11_225196	11_1215763	-0.134821	-5.42035	5.33436e-06	0.0197959	MUC5AC	known CpG island	no promoter	30	5	0
normal	19_49267882	19_48994172	0.343246	5.4015	5.63986e-06	0.0204192	LMTK3	no CpG island	no promoter	32	2	1
normal	19_49267882	19_49223605	0.312513	5.38265	5.96291e-06	0.0210748	no gene	no CpG island	no promoter	32	2	1
normal	2_67090367	2_67624630	0.0327317	5.34672	6.63074e-06	0.0228901	ETAA1	known CpG island	ETAA1	31	4	0
tumor	9_684160	9_970813	0.255503	5.03061	5.75088e-06	0.0270286	no gene	known CpG island	no promoter	28	17	11
normal	19_22652436	19_22193426	0.240323	5.27934	8.09099e-06	0.0272962	ZNF208	known CpG island	no promoter	28	5	2
tumor	11_35085453	11_35552014	0.077285	5.00473	6.30347e-06	0.02867	no gene	no CpG island	no promoter	19	21	16
tumor	19_49267882	19_49991215	0.0275748	4.97659	6.96358e-06	0.0301943	RPL13A	no CpG island	RPL13A	48	5	3
tumor	9_684160	9_974774	0.20905	4.97242	7.06689e-06	0.0301943	no gene	no CpG island	no promoter	28	17	11
normal	11_225196	11_1215771	-0.0469173	-5.21208	9.86882e-06	0.0325542	MUC5AC	known CpG island	no promoter	30	5	0
tumor	22_40669648	22_39715786	0.0135642	4.92885	8.2421e-06	0.0341797	RPL3	known CpG island	no promoter	27	25	4
tumor	11_225196	11_637014	0.110764	4.91682	8.59901e-06	0.034641	no gene	known CpG island	DRD4	48	8	0
normal	5_176450837	5_176314638	0.295192	5.17952	1.08646e-05	0.03506	HK3	known CpG island	no promoter	2	22	11
normal	9_684160	9_970297	0.11769	5.17025	1.11659e-05	0.0352654	no gene	known CpG island	no promoter	21	10	4
normal	2_11702661	2_11682017	-0.132874	-5.15845	1.15617e-05	0.0357548	GREB1	no CpG island	no promoter	6	11	18
tumor	11_225196	11_289979	-0.132028	-4.89278	9.3585e-06	0.0360683	ATHL1	known CpG island	ATHL1	48	8	0
tumor	5_1283755	5_1884331	0.0341964	4.88391	9.65512e-06	0.0360683	IRX4	known CpG island	CTD-2194D22.3	36	17	3
tumor	5_1283755	5_1884331	0.0341964	4.88391	9.65512e-06	0.0360683	CTD-2194D22.3	known CpG island	CTD-2194D22.3	36	17	3
tumor	10_105674854	10_106094119	0.143118	4.87151	1.00851e-05	0.0360683	ITPRIP	no CpG island	no promoter	8	10	38
tumor	9_684160	9_970507	0.130399	4.87131	1.00922e-05	0.0360683	no gene	known CpG island	no promoter	28	17	11
tumor	19_49267882	19_49401636	-0.237498	-4.86738	1.02323e-05	0.0360683	TULP2	no CpG island	NUCB1	48	5	3
normal	19_49267882	19_49468950	0.0708923	5.14528	1.20199e-05	0.0364131	FTL	known CpG island	FTL	32	2	1
normal	11_225196	11_910379	0.0580159	5.12816	1.26426e-05	0.0375335	CHID1	known CpG island	no promoter	30	5	0
tumor	5_176450837	5_176326721	-0.203129	-4.83373	1.15145e-05	0.0395977	no gene	no CpG island	no promoter	4	40	12
normal	19_49267882	19_49967136	-0.0829084	-5.10301	1.36163e-05	0.0396317	ALDH16A1	no CpG island	no promoter	32	2	1
normal	19_49267882	19_49967136	-0.0829084	-5.10301	1.36163e-05	0.0396317	CTD-3148I10.9	no CpG island	no promoter	32	2	1
tumor	9_684160	9_470675	-0.169583	-4.82606	1.18282e-05	0.039708	RP11-165F24.3	no CpG island	KANK1	28	17	11
tumor	9_684160	9_470675	-0.169583	-4.82606	1.18282e-05	0.039708	KANK1	no CpG island	KANK1	28	17	11
normal	19_49267882	19_50168814	0.0465976	5.09543	1.3924e-05	0.0397479	IRF3	no CpG island	BCL2L12	32	2	1
normal	5_1288547	5_1144976	0.0541801	5.08149	1.45084e-05	0.0406347	no gene	no CpG island	no promoter	2	13	20
tumor	4_70634441	4_71494275	-0.0419156	-4.80415	1.27707e-05	0.0418752	no gene	no CpG island	ENAM	29	16	11
tumor	2_67090367	2_66804584	0.0640674	4.77905	1.39411e-05	0.0446739	AC007392.3	known CpG island	no promoter	50	6	0
normal	11_225196	11_1008111	-0.0636708	-5.03994	1.6399e-05	0.0450792	AP2A2	known CpG island	no promoter	30	5	0
normal	19_49267882	19_49458454	0.0457497	5.02277	1.72499e-05	0.0464396	BAX	known CpG island	BAX	32	2	1
normal	19_49267882	19_48949287	0.0204038	5.01751	1.75195e-05	0.0464396	GRWD1	known CpG island	GRWD1	32	2	1
tumor	5_1283755	5_1857444	-0.277114	-4.75698	1.50565e-05	0.0471761	no gene	known CpG island	no promoter	36	17	3
tumor	9_876418	9_970751	-0.217526	-4.74241	1.58404e-05	0.0481621	no gene	known CpG island	no promoter	33	17	6
tumor	5_1286516	5_1285974	0.29902	4.73856	1.60544e-05	0.0481621	TERT	no CpG island	no promoter	7	29	20
normal	11_107999907	11_108535856	0.0795552	4.97614	1.97896e-05	0.0515367	DDX10	known CpG island	DDX10	31	4	0
normal	13_41179798	13_41223110	-0.174425	-4.95661	2.09614e-05	0.0536472	FOXO1	no CpG island	no promoter	15	16	4
normal	19_49267882	19_49092382	0.104748	4.94265	2.18403e-05	0.0544476	SULT2B1	no CpG island	no promoter	32	2	1
normal	11_32370380	11_32915121	0.0492163	4.94006	2.20078e-05	0.0544476	QSER1	known CpG island	QSER1	30	5	0
tumor	9_876418	9_974781	-0.201308	-4.68608	1.92649e-05	0.0549016	no gene	no CpG island	no promoter	33	17	6
tumor	5_1283755	5_946316	0.0528135	4.68582	1.92826e-05	0.0549016	no gene	no CpG island	RP11-661C8.2	36	17	3
tumor	5_1286516	5_1212647	-0.323752	-4.68304	1.94691e-05	0.0549016	SLC6A19	known CpG island	no promoter	7	29	20
tumor	12_46798900	12_45824581	0.103164	4.67181	2.02416e-05	0.0559609	ANO6	no CpG island	no promoter	16	28	12
normal	5_176450837	5_176314458	0.367891	4.91652	2.35855e-05	0.0573943	HK3	known CpG island	no promoter	2	22	11
normal	19_22652436	19_23015003	0.312336	4.88715	2.57134e-05	0.0615632	no gene	no CpG island	ZNF723	28	5	2
tumor	9_815682	9_973018	0.071541	4.6319	2.3238e-05	0.0630093	no gene	known CpG island	no promoter	30	20	6
tumor	1_22507684	1_22351500	0.0179332	4.62192	2.40522e-05	0.0639865	no gene	no CpG island	LINC00339	32	24	0
normal	2_67090367	2_67624627	0.0479425	4.85425	2.83242e-05	0.0667376	ETAA1	known CpG island	ETAA1	31	4	0
tumor	11_108354102	11_108365179	-0.0508271	-4.59447	2.6439e-05	0.0686647	KDELC2	no CpG island	no promoter	19	28	9
tumor	10_105674854	10_105049321	0.185649	4.5907	2.67847e-05	0.0686647	INA	no CpG island	no promoter	8	10	38
normal	5_1288547	5_531433	-0.104538	-4.83847	2.96685e-05	0.0687027	no gene	no CpG island	no promoter	2	13	20
normal	11_225196	11_330932	-0.265605	-4.83373	3.00838e-05	0.0687027	no gene	known CpG island	no promoter	30	5	0
tumor	X_70093038	X_70800619	0.0973241	4.58278	2.75244e-05	0.0693009	ACRC	no CpG island	no promoter	9	37	10
normal	5_1283755	5_1282413	-0.16958	-4.8165	3.16455e-05	0.071174	TERT	no CpG island	no promoter	18	14	3
normal	19_22652436	19_23578256	0.0415998	4.77512	3.57313e-05	0.0791641	ZNF91	no CpG island	no promoter	28	5	2
tumor	X_70093038	X_69510410	0.145948	4.53864	3.20294e-05	0.0792289	KIF4A	no CpG island	KIF4A	9	37	10
tumor	11_225196	11_489261	-0.0851645	-4.525	3.35617e-05	0.0809809	PTDSS2	known CpG island	no promoter	48	8	0
tumor	9_815682	9_974774	0.224223	4.52077	3.40504e-05	0.0809809	no gene	no CpG island	no promoter	30	20	6
tumor	6_152593102	6_152555112	-0.216589	-4.51727	3.44607e-05	0.0809809	SYNE1	no CpG island	no promoter	17	31	8
tumor	3_128122820	3_127295084	-0.174728	-4.48975	3.78597e-05	0.0862225	TPRA1	no CpG island	no promoter	35	16	5
tumor	3_169514585	3_169165565	-0.110461	-4.48467	3.85223e-05	0.0862225	MECOM	no CpG island	RP11-641D5.2	25	23	8
tumor	11_225196	11_207810	0.0344069	4.48464	3.85258e-05	0.0862225	RIC8A	known CpG island	RIC8A	48	8	0
normal	19_49267882	19_48774560	0.0638759	4.72866	4.09446e-05	0.0886346	ZNF114	no CpG island	no promoter	32	2	1
normal	11_225196	11_237153	0.0628205	4.72653	4.12001e-05	0.0886346	PSMD13	known CpG island	PSMD13	30	5	0
tumor	6_152546094	6_152506734	-0.186089	-4.47021	4.04689e-05	0.0891561	SYNE1	no CpG island	no promoter	7	24	25
tumor	5_1286516	5_1136755	0.0414495	4.46523	4.11623e-05	0.0892887	no gene	no CpG island	no promoter	7	29	20
tumor	11_225196	11_195431	0.221826	4.45173	4.30989e-05	0.0920729	BET1L	no CpG island	ODF3	48	8	0
tumor	11_225196	11_518687	0.052208	4.447	4.37976e-05	0.092169	no gene	known CpG island	no promoter	48	8	0
normal	3_169514585	3_169492018	-0.0898168	-4.70655	4.36832e-05	0.0926339	MYNN	no CpG island	no promoter	19	15	1
tumor	2_11721535	2_11723111	-0.157049	-4.44101	4.46986e-05	0.0926818	GREB1	no CpG island	RN7SL674P	25	23	8
tumor	10_105674854	10_105127829	-0.0214637	-4.43634	4.54137e-05	0.0927999	TAF5	no CpG island	TAF5	8	10	38
tumor	1_22450487	1_22774430	0.157666	4.41901	4.81668e-05	0.0970197	no gene	no CpG island	no promoter	40	15	1
normal	X_131171122	X_130411880	-0.0961844	-4.68506	4.65197e-05	0.0972595	IGSF1	no CpG island	no promoter	18	14	3
tumor	5_1286516	5_1744356	-0.235105	-4.40907	4.98177e-05	0.09842	no gene	no CpG island	no promoter	7	29	20
tumor	1_22450487	1_22166196	0.245968	4.40648	5.02581e-05	0.09842	HSPG2	no CpG island	no promoter	40	15	1
tumor	5_1286516	5_1298644	-0.19668	-4.40063	5.12645e-05	0.0990156	no gene	no CpG island	no promoter	7	29	20
tumor	1_22450487	1_23100850	0.0894405	4.37687	5.55559e-05	0.102739	EPHB2	no CpG island	no promoter	40	15	1
tumor	19_49267882	19_49867002	0.0166693	4.37487	5.5933e-05	0.102739	DKKL1	known CpG island	no promoter	48	5	3
tumor	5_1283755	5_1085037	-0.0265529	-4.37353	5.61863e-05	0.102739	SLC12A7	no CpG island	no promoter	36	17	3
tumor	9_876418	9_970112	-0.17749	-4.37033	5.67986e-05	0.102739	no gene	known CpG island	no promoter	33	17	6
tumor	19_49267882	19_48972790	0.0235722	4.37013	5.68354e-05	0.102739	CTC-273B12.5	known CpG island	CYTH2	48	5	3
tumor	19_49267882	19_48972790	0.0235722	4.37013	5.68354e-05	0.102739	CTC-273B12.7	known CpG island	CYTH2	48	5	3
tumor	19_49267882	19_48972790	0.0235722	4.37013	5.68354e-05	0.102739	CYTH2	known CpG island	CYTH2	48	5	3
tumor	1_22450487	1_23100725	0.0743753	4.35628	5.95569e-05	0.105787	EPHB2	no CpG island	no promoter	40	15	1
tumor	9_815682	9_974793	0.191901	4.349	6.10384e-05	0.105787	no gene	no CpG island	no promoter	30	20	6
tumor	5_1283755	5_889626	0.0990533	4.34758	6.13311e-05	0.105787	BRD9	no CpG island	no promoter	36	17	3
tumor	2_11721535	2_11727085	-0.122411	-4.34437	6.19973e-05	0.105787	GREB1	no CpG island	no promoter	25	23	8
tumor	3_128122820	3_127391049	0.0573729	4.34283	6.23215e-05	0.105787	PODXL2	known CpG island	ABTB1	35	16	5
tumor	11_225196	11_507751	0.084927	4.3395	6.30235e-05	0.105787	no gene	known CpG island	no promoter	48	8	0
normal	5_1288547	5_1115130	0.032046	4.65101	5.13914e-05	0.105953	no gene	no CpG island	no promoter	2	13	20
normal	2_11721535	2_11723111	-0.123816	-4.64369	5.25029e-05	0.106761	GREB1	no CpG island	RN7SL674P	14	15	6
tumor	1_22450487	1_23100735	0.105764	4.32994	6.5085e-05	0.107217	EPHB2	no CpG island	no promoter	40	15	1
tumor	9_815682	9_974820	0.208782	4.32853	6.53961e-05	0.107217	no gene	no CpG island	no promoter	30	20	6
tumor	5_1288547	5_1673409	0.244718	4.32444	6.63028e-05	0.107454	no gene	no CpG island	no promoter	2	17	37
normal	19_49267882	19_49521508	0.0453655	4.63458	5.39199e-05	0.108161	CTB-60B18.10	known CpG island	no promoter	32	2	1
tumor	11_35085453	11_35964907	0.0946841	4.28197	7.64631e-05	0.120579	no gene	no CpG island	LDLRAD3	19	21	16
tumor	11_225196	11_805049	0.0669544	4.28043	7.68607e-05	0.120579	PIDD	known CpG island	no promoter	48	8	0
tumor	9_684160	9_761482	-0.131776	-4.27807	7.74703e-05	0.120579	no gene	no CpG island	no promoter	28	17	11
tumor	19_49267882	19_49314148	0.0118668	4.27671	7.78223e-05	0.120579	BCAT2	known CpG island	no promoter	48	5	3
tumor	5_1286516	5_2180279	-0.190224	-4.26691	8.04196e-05	0.121622	no gene	known CpG island	no promoter	7	29	20
tumor	9_876418	9_469799	0.0943563	4.26625	8.05966e-05	0.121622	RP11-165F24.3	no CpG island	KANK1	33	17	6
tumor	22_40669648	22_40784278	-0.255402	-4.26445	8.10831e-05	0.121622	ADSL	no CpG island	no promoter	27	25	4
tumor	22_40669648	22_40784278	-0.255402	-4.26445	8.10831e-05	0.121622	SGSM3	no CpG island	no promoter	27	25	4
tumor	22_40669648	22_40784278	-0.255402	-4.26445	8.10831e-05	0.121622	RP5-1042K10.10	no CpG island	no promoter	27	25	4
normal	19_49267882	19_50247255	-0.104226	-4.57478	6.42054e-05	0.127076	TSKS	no CpG island	no promoter	32	2	1
tumor	5_1288547	5_1285974	0.326154	4.23705	8.88574e-05	0.13188	TERT	no CpG island	no promoter	2	17	37
tumor	11_35085453	11_34358397	0.0894288	4.2337	8.98546e-05	0.131971	ABTB2	no CpG island	no promoter	19	21	16
normal	11_32370380	11_33037306	0.260714	4.55204	6.86051e-05	0.133997	no gene	known CpG island	DEPDC7	30	5	0
normal	2_67090367	2_66660107	0.0336352	4.54099	7.08506e-05	0.135104	MEIS1-AS3	no CpG island	MEIS1	31	4	0
normal	19_49267882	19_49298422	0.0261101	4.53761	7.1552e-05	0.135104	BCAT2	known CpG island	no promoter	32	2	1
normal	2_67090367	2_67624819	0.0587066	4.53278	7.25666e-05	0.135104	ETAA1	known CpG island	ETAA1	31	4	0
normal	19_49267882	19_48987107	-0.212551	-4.53162	7.28121e-05	0.135104	no gene	no CpG island	no promoter	32	2	1
tumor	11_32459923	11_32913219	-0.206498	-4.2188	9.44311e-05	0.136	no gene	no CpG island	QSER1	32	24	0
tumor	1_22450487	1_21894615	-0.164063	-4.21807	9.46608e-05	0.136	ALPL	no CpG island	no promoter	40	15	1
tumor	19_49267882	19_48821705	-0.0773135	-4.2131	9.62407e-05	0.136	CCDC114	no CpG island	no promoter	48	5	3
tumor	1_22450487	1_22456614	-0.175798	-4.21242	9.64557e-05	0.136	WNT4	no CpG island	no promoter	40	15	1
tumor	9_815682	9_975079	0.185392	4.19826	0.000101108	0.139711	no gene	no CpG island	DMRT3	30	20	6
tumor	9_815682	9_974840	0.204933	4.19762	0.000101324	0.139711	no gene	no CpG island	no promoter	30	20	6
tumor	6_152684585	6_152625320	-0.136292	-4.19544	0.000102061	0.139711	SYNE1	no CpG island	no promoter	28	25	3
tumor	6_152546094	6_152547148	0.146517	4.18794	0.000104636	0.141859	SYNE1	no CpG island	no promoter	7	24	25
normal	19_49267882	19_48965431	-0.265594	-4.51023	7.74905e-05	0.14199	KCNJ14	known CpG island	no promoter	32	2	1
normal	9_684160	9_419398	-0.203437	-4.50606	7.84365e-05	0.14199	DOCK8	no CpG island	no promoter	21	10	4
tumor	11_35085453	11_34160446	0.0562821	4.18089	0.000107111	0.142764	NAT10	no CpG island	no promoter	19	21	16
tumor	9_876418	9_505571	0.0448629	4.18028	0.000107329	0.142764	KANK1	known CpG island	no promoter	33	17	6
tumor	9_876418	9_970712	-0.192764	-4.16937	0.000111285	0.146127	no gene	known CpG island	no promoter	33	17	6
tumor	9_684160	9_973865	0.113683	4.1649	0.000112943	0.146127	no gene	no CpG island	no promoter	28	17	11
tumor	X_70093038	X_69719575	0.227718	4.16339	0.000113509	0.146127	DLG3	no CpG island	no promoter	9	37	10
tumor	9_802228	9_974781	0.18803	4.15785	0.00011561	0.146127	no gene	no CpG island	no promoter	7	27	22
tumor	10_105674854	10_105362277	0.0801689	4.15617	0.000116256	0.146127	SH3PXD2A	no CpG island	no promoter	8	10	38
tumor	11_32370380	11_32447635	-0.33338	-4.14806	0.000119418	0.146127	WT1	no CpG island	no promoter	48	8	0
tumor	5_1286516	5_1702577	0.19963	4.14763	0.000119587	0.146127	no gene	known CpG island	no promoter	7	29	20
tumor	5_176450837	5_175717196	0.0615622	4.14665	0.000119977	0.146127	SIMC1	no CpG island	no promoter	4	40	12
tumor	10_105674854	10_105660650	-0.2122	-4.14522	0.000120544	0.146127	OBFC1	no CpG island	no promoter	8	10	38
tumor	1_22507684	1_21983793	0.293437	4.1442	0.000120953	0.146127	RAP1GAP	no CpG island	no promoter	32	24	0
tumor	9_826585	9_974781	0.177155	4.14213	0.000121782	0.146127	no gene	no CpG island	no promoter	9	25	22
tumor	19_22652436	19_23432969	0.0122317	4.14013	0.000122587	0.146127	ZNF724P	no CpG island	no promoter	37	15	4
tumor	11_32370380	11_32421469	-0.247304	-4.13831	0.00012333	0.146127	WT1	no CpG island	no promoter	48	8	0
tumor	9_815682	9_970542	0.159029	4.13488	0.000124736	0.146561	no gene	known CpG island	no promoter	30	20	6
tumor	9_802228	9_973184	0.186135	4.13119	0.000126264	0.147131	no gene	known CpG island	no promoter	7	27	22
tumor	1_22450487	1_22649778	-0.232015	-4.12852	0.000127379	0.147214	RP11-415K20.1	no CpG island	no promoter	40	15	1
normal	6_152562271	6_152959260	-0.134387	-4.48516	8.3353e-05	0.147832	no gene	no CpG island	no promoter	21	12	2
normal	9_684160	9_968087	0.112795	4.48267	8.39591e-05	0.147832	DMRT1	no CpG island	no promoter	21	10	4
normal	X_131626317	X_132231429	-0.0476508	-4.47674	8.5417e-05	0.147832	no gene	no CpG island	no promoter	25	10	0
normal	19_49267882	19_49497072	0.0614875	4.47582	8.56473e-05	0.147832	RUVBL2	no CpG island	RUVBL2	32	2	1
normal	9_684160	9_970569	0.0900737	4.46567	8.82118e-05	0.150509	no gene	known CpG island	no promoter	21	10	4
normal	11_225196	11_207998	0.015521	4.45438	9.11505e-05	0.153755	RIC8A	known CpG island	RIC8A	30	5	0
tumor	X_70022420	X_70800619	0.0782861	4.11194	0.000134537	0.154222	ACRC	no CpG island	no promoter	7	27	22
tumor	9_684160	9_113155	0.0967797	4.10506	0.000137623	0.156488	RP11-143M1.4	known CpG island	no promoter	28	17	11
normal	11_32459923	11_32453188	0.163156	4.44271	9.42935e-05	0.15727	WT1	no CpG island	no promoter	23	12	0
tumor	5_1288547	5_1169373	0.0646583	4.09931	0.000140248	0.158197	no gene	no CpG island	no promoter	2	17	37
normal	19_49267882	19_49618294	0.0806549	4.43532	9.63373e-05	0.158893	LIN7B	known CpG island	LIN7B	32	2	1
normal	16_51481596	16_51788548	-0.321361	-4.42253	9.99812e-05	0.161129	no gene	no CpG island	no promoter	26	8	1
normal	19_49267882	19_49946741	0.0803655	4.41656	0.000101725	0.161129	no gene	known CpG island	no promoter	32	2	1
normal	19_49267882	19_49652458	0.0402322	4.41513	0.000102148	0.161129	PPFIA3	known CpG island	no promoter	32	2	1
normal	X_70093038	X_70150722	-0.121171	-4.41418	0.00010243	0.161129	SLC7A3	known CpG island	no promoter	7	21	7
normal	11_35085453	11_35990721	0.0799853	4.40321	0.000105739	0.161129	LDLRAD3	no CpG island	no promoter	8	18	9
normal	6_152543949	6_151670579	-0.0821383	-4.4027	0.000105897	0.161129	AKAP12	no CpG island	no promoter	21	13	1
normal	16_51481596	16_51324674	-0.258223	-4.40253	0.000105949	0.161129	no gene	no CpG island	no promoter	26	8	1
normal	9_684160	9_970549	0.121591	4.40114	0.000106376	0.161129	no gene	known CpG island	no promoter	21	10	4
tumor	9_876418	9_761497	0.128353	4.09037	0.000144437	0.161609	no gene	no CpG island	no promoter	33	17	6
tumor	X_70149078	X_70503930	-0.110504	-4.088	0.000145566	0.161609	NONO	known CpG island	NONO	21	26	9
normal	12_46831129	12_46777962	-0.0150882	-4.39452	0.000108439	0.162593	RP11-96H19.1	no CpG island	RP11-96H19.1	5	14	16
tumor	9_684160	9_974476	0.195007	4.07727	0.000150785	0.166096	no gene	no CpG island	no promoter	28	17	11
tumor	11_225196	11_626128	0.382115	4.07018	0.000154336	0.167389	no gene	no CpG island	no promoter	48	8	0
tumor	11_32370380	11_31813176	-0.0535309	-4.06942	0.000154719	0.167389	PAX6	no CpG island	no promoter	48	8	0
tumor	3_128122820	3_128127006	-0.0611794	-4.06784	0.000155521	0.167389	EEFSEC	no CpG island	no promoter	35	16	5
tumor	9_815682	9_974269	0.180324	4.06533	0.000156808	0.167496	no gene	no CpG island	no promoter	30	20	6
normal	11_225196	11_627999	-0.0327603	-4.37758	0.000113892	0.168073	no gene	known CpG island	no promoter	30	5	0
normal	X_70022420	X_70151816	0.082341	4.37617	0.000114358	0.168073	no gene	no CpG island	no promoter	5	15	15
tumor	19_22652436	19_21688629	0.0147432	4.05733	0.000160974	0.168736	ZNF429	known CpG island	no promoter	37	15	4
tumor	3_128122820	3_128185730	-0.108406	-4.05694	0.000161182	0.168736	DNAJB8	no CpG island	no promoter	35	16	5
tumor	3_128122820	3_128185730	-0.108406	-4.05694	0.000161182	0.168736	DNAJB8-AS1	no CpG island	no promoter	35	16	5
tumor	5_1283755	5_1857430	-0.236837	-4.05367	0.000162912	0.168736	no gene	known CpG island	no promoter	36	17	3
tumor	4_70634441	4_70680391	-0.105464	-4.04688	0.000166577	0.168736	SULT1E1	no CpG island	no promoter	29	16	11
tumor	9_876418	9_505307	0.0222993	4.04613	0.000166986	0.168736	KANK1	known CpG island	no promoter	33	17	6
tumor	19_49267882	19_48949217	0.0169013	4.04455	0.000167852	0.168736	GRWD1	known CpG island	GRWD1	48	5	3
tumor	5_176450837	5_176463551	-0.29146	-4.04348	0.000168436	0.168736	ZNF346	no CpG island	no promoter	4	40	12
tumor	19_49267882	19_48917831	-0.206453	-4.04298	0.000168712	0.168736	GRIN2D	no CpG island	no promoter	48	5	3
tumor	9_815682	9_975282	0.182012	4.04293	0.00016874	0.168736	no gene	no CpG island	DMRT3	30	20	6
tumor	11_32459923	11_33375412	-0.146684	-4.03857	0.000171163	0.169954	HIPK3	no CpG island	AL122015.1	32	24	0
tumor	10_105674854	10_104952454	-0.0140574	-4.03109	0.000175396	0.172939	NT5C2	known CpG island	no promoter	8	10	38
tumor	9_815682	9_974162	0.162924	4.02719	0.000177647	0.173008	no gene	no CpG island	no promoter	30	20	6
tumor	3_128122820	3_128486192	0.153294	4.026	0.000178336	0.173008	RAB7A	no CpG island	no promoter	35	16	5
tumor	X_70149078	X_69370448	-0.0506056	-4.02168	0.000180871	0.173008	IGBP1	no CpG island	no promoter	21	26	9
tumor	6_152684585	6_153074483	-0.11885	-4.02058	0.000181519	0.173008	VIP	no CpG island	no promoter	28	25	3
tumor	X_131626317	X_130930114	-0.17407	-4.02044	0.000181601	0.173008	RP11-453F18__B.1	known CpG island	no promoter	35	21	0
tumor	X_131626317	X_130930114	-0.17407	-4.02044	0.000181601	0.173008	RP11-512H23.2	known CpG island	no promoter	35	21	0
normal	X_131171122	X_131624786	-0.152265	-4.36207	0.000119119	0.173355	no gene	no CpG island	no promoter	18	14	3
tumor	13_41179798	13_41223110	-0.197676	-4.01372	0.000185629	0.175658	FOXO1	no CpG island	no promoter	28	23	5
tumor	22_40669648	22_40803112	-0.24937	-4.01145	0.000187005	0.175781	SGSM3	no CpG island	no promoter	27	25	4
normal	11_32370380	11_33061068	0.0265396	4.35174	0.000122734	0.176882	TCP11L1	known CpG island	TCP11L1	30	5	0
tumor	1_22450487	1_21895961	-0.202775	-4.00641	0.000190103	0.17751	ALPL	no CpG island	no promoter	40	15	1
normal	11_225196	11_696130	0.05	4.34248	0.000126064	0.177834	DEAF1	known CpG island	TMEM80	30	5	0
normal	11_225196	11_696130	0.05	4.34248	0.000126064	0.177834	EPS8L2	known CpG island	TMEM80	30	5	0
normal	11_225196	11_696130	0.05	4.34248	0.000126064	0.177834	TMEM80	known CpG island	TMEM80	30	5	0
normal	19_49267882	19_50095628	0.0503002	4.34247	0.000126067	0.177834	PRR12	no CpG island	PRR12	32	2	1
normal	6_152593102	6_151773810	0.0305863	4.3381	0.00012767	0.177834	C6orf211	known CpG island	C6orf211	15	16	4
normal	11_225196	11_809538	0.0641026	4.3367	0.000128187	0.177834	PIDD	known CpG island	RPLP2	30	5	0
tumor	10_105674854	10_105156483	-0.0212176	-3.99809	0.000195319	0.179989	PDCD11	known CpG island	PDCD11	8	10	38
tumor	5_1288547	5_1004849	-0.027297	-3.9959	0.00019672	0.179989	no gene	known CpG island	AC116351.2	2	17	37
tumor	5_1288547	5_1004849	-0.027297	-3.9959	0.00019672	0.179989	no gene	known CpG island	RP11-43F13.4	2	17	37
tumor	9_802228	9_974979	0.172563	3.99287	0.000198665	0.179989	no gene	no CpG island	DMRT3	7	27	22
tumor	9_815682	9_973275	0.175132	3.99088	0.000199952	0.179989	no gene	known CpG island	no promoter	30	20	6
tumor	X_70022420	X_69719575	0.192159	3.99041	0.000200261	0.179989	DLG3	no CpG island	no promoter	7	27	22
tumor	5_1283755	5_1277576	0.233561	3.98933	0.000200967	0.179989	TERT	known CpG island	no promoter	36	17	3
tumor	1_22450487	1_22160079	0.144623	3.98822	0.000201694	0.179989	HSPG2	no CpG island	no promoter	40	15	1
tumor	19_22652436	19_21688396	0.03165	3.9835	0.000204812	0.181622	ZNF429	no CpG island	no promoter	37	15	4
tumor	19_49267882	19_50016571	0.0175036	3.98101	0.000206469	0.181947	FCGRT	known CpG island	no promoter	48	5	3
normal	X_70149078	X_70612781	-0.0271721	-4.32306	0.00013334	0.182554	TAF1	no CpG island	no promoter	14	15	6
normal	11_225196	11_726443	0.0309524	4.32123	0.000134049	0.182554	EPS8L2	known CpG island	no promoter	30	5	0
normal	11_225196	11_726443	0.0309524	4.32123	0.000134049	0.182554	AP006621.9	known CpG island	no promoter	30	5	0
normal	11_32370380	11_31833922	0.331812	4.31792	0.000135334	0.182629	PAX6	known CpG island	RCN1	30	5	0
tumor	5_1288547	5_759495	-0.166825	-3.97569	0.000210071	0.183218	ZDHHC11	no CpG island	no promoter	2	17	37
tumor	5_1288547	5_759495	-0.166825	-3.97569	0.000210071	0.183218	ZDHHC11B	no CpG island	no promoter	2	17	37
tumor	19_49267882	19_49939625	-0.149535	-3.97504	0.000210511	0.183218	SLC17A7	known CpG island	no promoter	48	5	3
normal	11_225196	11_805033	0.0304598	4.31063	0.000138215	0.184836	PIDD	known CpG island	no promoter	30	5	0
normal	5_1283755	5_1510512	0.0768004	4.30485	0.000140538	0.184985	LPCAT1	no CpG island	no promoter	18	14	3
normal	11_108354102	11_108365175	-0.109566	-4.30416	0.000140819	0.184985	KDELC2	no CpG island	no promoter	10	20	5
tumor	2_11702661	2_11274426	0.0852611	3.96656	0.000216382	0.187173	C2orf50	no CpG island	no promoter	12	18	26
tumor	3_128122820	3_128713055	0.0345857	3.96367	0.000218421	0.187785	KIAA1257	known CpG island	no promoter	35	16	5
tumor	5_1288547	5_1371226	0.229538	3.9566	0.00022348	0.190151	RP11-325I22.2	no CpG island	no promoter	2	17	37
tumor	9_876418	9_974774	-0.201715	-3.95401	0.000225364	0.190151	no gene	no CpG island	no promoter	33	17	6
tumor	11_35085453	11_35442235	0.133362	3.95231	0.000226608	0.190151	RP4-683L5.1	no CpG island	no promoter	19	21	16
tumor	11_35085453	11_35442135	0.127931	3.95197	0.000226858	0.190151	RP4-683L5.1	no CpG island	no promoter	19	21	16
tumor	5_1283755	5_1603102	0.125145	3.95053	0.000227916	0.190151	CTD-2012J19.3	no CpG island	no promoter	36	17	3
tumor	5_1283755	5_1603102	0.125145	3.95053	0.000227916	0.190151	RP11-43F13.1	no CpG island	no promoter	36	17	3
tumor	5_1288547	5_1110982	0.16048	3.94274	0.000233734	0.190646	SLC12A7	no CpG island	no promoter	2	17	37
tumor	2_67090367	2_66660570	0.0170666	3.94197	0.000234316	0.190646	MEIS1-AS3	known CpG island	MEIS1	50	6	0
tumor	12_46831129	12_47224916	-0.0468216	-3.9396	0.000236116	0.190646	SLC38A4	known CpG island	no promoter	11	22	23
tumor	19_49267882	19_48949441	0.0151925	3.93894	0.000236622	0.190646	GRWD1	known CpG island	GRWD1	48	5	3
tumor	19_49267882	19_49137642	0.012154	3.93894	0.000236622	0.190646	DBP	no CpG island	no promoter	48	5	3
tumor	19_49267882	19_49559719	0.0162054	3.93894	0.000236622	0.190646	CGB7	known CpG island	no promoter	48	5	3
tumor	19_49267882	19_49559719	0.0162054	3.93894	0.000236622	0.190646	NTF4	known CpG island	no promoter	48	5	3
tumor	11_32370380	11_32439879	-0.225484	-3.93682	0.00023825	0.190764	WT1	no CpG island	no promoter	48	8	0
tumor	9_802228	9_968030	0.178937	3.93524	0.000239474	0.190764	DMRT1	no CpG island	no promoter	7	27	22
tumor	19_49267882	19_49622354	0.0606498	3.92975	0.000243758	0.191875	C19orf73	known CpG island	PPFIA3	48	5	3
tumor	9_815682	9_973207	0.127797	3.92884	0.000244474	0.191875	no gene	known CpG island	no promoter	30	20	6
tumor	12_46798900	12_47224916	-0.0497486	-3.92823	0.000244952	0.191875	SLC38A4	known CpG island	no promoter	16	28	12
tumor	5_1283755	5_1088349	-0.0464783	-3.92327	0.000248907	0.193737	SLC12A7	known CpG island	no promoter	36	17	3
tumor	1_22450487	1_23111538	-0.129231	-3.92182	0.000250077	0.193737	EPHB2	known CpG island	no promoter	40	15	1
normal	5_1286516	5_1882246	0.0522149	4.28496	0.000148841	0.193809	IRX4	known CpG island	CTD-2194D22.3	6	22	7
normal	3_128122820	3_127323830	0.252805	4.28117	0.000150476	0.194233	MCM2	known CpG island	no promoter	20	10	5
normal	11_107999907	11_107441014	-0.116366	-4.27625	0.000152623	0.195227	no gene	no CpG island	no promoter	31	4	0
normal	19_49267882	19_49174543	-0.167599	-4.27073	0.000155072	0.195227	SEC1P	no CpG island	no promoter	32	2	1
normal	19_49267882	19_49174543	-0.167599	-4.27073	0.000155072	0.195227	NTN5	no CpG island	no promoter	32	2	1
normal	11_225196	11_797651	0.0233333	4.27046	0.000155191	0.195227	SLC25A22	known CpG island	no promoter	30	5	0
normal	9_684160	9_975192	0.111327	4.26357	0.000158306	0.196932	no gene	no CpG island	DMRT3	21	10	4
normal	6_152543949	6_152623422	0.0196603	4.26161	0.0001592	0.196932	SYNE1	known CpG island	no promoter	21	13	1
normal	X_131626317	X_132549953	0.356245	4.25805	0.000160842	0.197318	no gene	known CpG island	no promoter	25	10	0
tumor	1_22450487	1_21583978	-0.104329	-3.91438	0.000256144	0.197352	ECE1	no CpG island	no promoter	40	15	1
normal	9_684160	9_970511	0.0986971	4.2543	0.000162587	0.197825	no gene	known CpG island	no promoter	21	10	4
normal	11_225196	11_809907	0.0530303	4.24816	0.000165485	0.198558	RPLP2	known CpG island	RPLP2	30	5	0
normal	11_225196	11_809907	0.0530303	4.24816	0.000165485	0.198558	RPLP2	known CpG island	SNORA52	30	5	0
normal	9_684160	9_971661	0.0309563	4.24737	0.000165865	0.198558	no gene	known CpG island	no promoter	21	10	4
normal	X_70022420	X_69353317	-0.0718596	-4.24112	0.000168875	0.200544	IGBP1	known CpG island	IGBP1	5	15	15
tumor	11_35085453	11_34936680	0.0902045	3.90282	0.000265857	0.203723	APIP	no CpG island	PDHX	19	21	16
tumor	5_1288547	5_2132336	0.187044	3.90043	0.000267914	0.204189	no gene	no CpG island	no promoter	2	17	37
normal	9_802228	9_1043137	0.146403	4.23063	0.000174048	0.205047	no gene	no CpG island	no promoter	3	17	15
tumor	6_152546094	6_153324852	0.0362189	3.89592	0.00027183	0.205143	no gene	no CpG island	no promoter	7	24	25
tumor	11_32370380	11_32456203	0.0398377	3.89442	0.000273144	0.205143	WT1	known CpG island	WT1-AS	48	8	0
tumor	9_815682	9_970578	0.158794	3.89398	0.00027353	0.205143	no gene	known CpG island	no promoter	30	20	6
tumor	X_131626317	X_132550252	0.170988	3.89207	0.000275218	0.205317	no gene	known CpG island	no promoter	35	21	0
tumor	19_49267882	19_50168862	0.0163658	3.88806	0.000278782	0.206881	IRF3	known CpG island	BCL2L12	48	5	3
tumor	19_49267882	19_50168862	0.0163658	3.88806	0.000278782	0.206881	BCL2L12	known CpG island	BCL2L12	48	5	3
tumor	6_152562271	6_153074483	-0.122501	-3.88608	0.000280562	0.207112	VIP	no CpG island	no promoter	34	20	2
normal	11_225196	11_506592	0.0265086	4.21957	0.000179671	0.20856	RNH1	known CpG island	no promoter	30	5	0
normal	11_225196	11_615960	0.0682353	4.2189	0.000180019	0.20856	IRF7	known CpG island	no promoter	30	5	0
normal	9_684160	9_970505	0.0847963	4.21653	0.000181245	0.20856	no gene	known CpG island	no promoter	21	10	4
tumor	9_815682	9_973531	0.179308	3.88218	0.000284095	0.208628	no gene	no CpG island	no promoter	30	20	6
tumor	12_46798900	12_46662247	-0.0201666	-3.87493	0.000290789	0.208669	SLC38A1	known CpG island	no promoter	16	28	12
tumor	1_22450487	1_21503514	0.0664238	3.87458	0.000291112	0.208669	no gene	known CpG island	no promoter	40	15	1
tumor	22_40669648	22_40859364	-0.154959	-3.87441	0.000291272	0.208669	MKL1	no CpG island	no promoter	27	25	4
tumor	5_176450837	5_176435980	-0.22206	-3.87313	0.000292468	0.208669	UIMC1	no CpG island	no promoter	4	40	12
tumor	5_1288547	5_945966	-0.143717	-3.87275	0.000292831	0.208669	no gene	no CpG island	RP11-661C8.2	2	17	37
tumor	19_49267882	19_49122406	0.122867	3.8705	0.000294946	0.208669	RPL18	known CpG island	SPHK2	48	5	3
tumor	9_876418	9_1046026	-0.178284	-3.87047	0.000294973	0.208669	no gene	known CpG island	no promoter	33	17	6
tumor	1_22450487	1_22290107	-0.207467	-3.8694	0.000295991	0.208669	no gene	no CpG island	no promoter	40	15	1
tumor	9_876418	9_505498	0.0326138	3.86697	0.000298301	0.209252	KANK1	known CpG island	no promoter	33	17	6
tumor	11_225196	11_776814	0.0475184	3.86445	0.00030072	0.209904	PDDC1	known CpG island	AP006621.5	48	8	0
normal	11_32370380	11_31821689	0.0952755	4.20592	0.000186856	0.209981	PAX6	no CpG island	no promoter	30	5	0
normal	11_225196	11_288733	0.0208333	4.20459	0.000187573	0.209981	RP11-326C3.2	no CpG island	ATHL1	30	5	0
normal	12_46831129	12_46384065	-0.0216983	-4.2036	0.000188109	0.209981	SCAF11	known CpG island	no promoter	5	14	16
normal	11_107999907	11_107729923	0.0371257	4.20354	0.000188139	0.209981	SLC35F2	no CpG island	no promoter	31	4	0
normal	11_107999907	11_107986343	0.113193	4.19928	0.000190453	0.210978	RP11-144G7.2	no CpG island	no promoter	31	4	0
normal	5_1288547	5_880684	0.0305069	4.18839	0.000196501	0.216066	BRD9	no CpG island	no promoter	2	13	20
tumor	19_49267882	19_49521859	0.0181469	3.85351	0.000311438	0.216315	CTB-60B18.10	known CpG island	no promoter	48	5	3
normal	19_49267882	19_49401636	-0.308962	-4.18001	0.000201283	0.219468	TULP2	no CpG island	NUCB1	32	2	1
normal	19_22652436	19_21950210	0.0296201	4.17653	0.000203303	0.219468	ZNF100	known CpG island	no promoter	28	5	2
normal	5_1286516	5_770059	-0.0421999	-4.17528	0.000204032	0.219468	ZDHHC11	no CpG island	no promoter	6	22	7
tumor	9_802228	9_990602	0.130101	3.84589	0.000319131	0.219723	DMRT3	no CpG island	no promoter	7	27	22
tumor	3_128122820	3_128764700	0.0786603	3.84487	0.000320169	0.219723	RP11-434H6.2	known CpG island	RP11-434H6.2	35	16	5
tumor	19_49267882	19_49655122	0.0447897	3.84404	0.00032102	0.219723	HRC	known CpG island	no promoter	48	5	3
tumor	11_32368744	11_31842002	0.130919	3.83983	0.000325369	0.221623	RCN1	known CpG island	no promoter	16	34	6
tumor	9_815682	9_970511	0.158174	3.83671	0.000328623	0.221917	no gene	known CpG island	no promoter	30	20	6
tumor	10_105674854	10_105524980	0.12981	3.83211	0.000333488	0.221917	SH3PXD2A	no CpG island	no promoter	8	10	38
tumor	11_32459923	11_32452466	-0.0894533	-3.8319	0.000333704	0.221917	WT1	known CpG island	no promoter	32	24	0
tumor	5_1283755	5_1857435	-0.251844	-3.8314	0.000334245	0.221917	no gene	known CpG island	no promoter	36	17	3
tumor	11_108168995	11_108338025	0.0093733	3.83007	0.000335666	0.221917	C11orf65	no CpG island	no promoter	34	20	2
tumor	5_1288547	5_1891047	0.225684	3.82639	0.000339624	0.221917	CTD-2194D22.4	no CpG island	no promoter	2	17	37
tumor	9_815682	9_970551	0.163224	3.82304	0.000343272	0.221917	no gene	known CpG island	no promoter	30	20	6
tumor	9_826585	9_974719	0.146996	3.82169	0.000344752	0.221917	no gene	no CpG island	no promoter	9	25	22
tumor	11_225196	11_207681	0.0323247	3.82102	0.000345495	0.221917	RIC8A	known CpG island	RIC8A	48	8	0
tumor	19_49267882	19_49253847	-0.0596775	-3.82095	0.000345569	0.221917	FUT1	known CpG island	no promoter	48	5	3
tumor	11_32459923	11_31822526	0.156762	3.82035	0.000346229	0.221917	PAX6	no CpG island	no promoter	32	24	0
tumor	11_225196	11_577391	0.0137574	3.8195	0.000347169	0.221917	PHRF1	no CpG island	PHRF1	48	8	0
tumor	5_1286516	5_1207526	-0.258031	-3.81935	0.000347333	0.221917	SLC6A19	known CpG island	no promoter	7	29	20
tumor	5_1288547	5_1140233	0.113854	3.8189	0.000347835	0.221917	no gene	no CpG island	no promoter	2	17	37
tumor	19_49267882	19_49385230	-0.277357	-3.81648	0.000350521	0.222623	TULP2	no CpG island	no promoter	48	5	3
normal	19_49267882	19_49575337	0.117164	4.16744	0.00020867	0.222844	KCNA7	known CpG island	no promoter	32	2	1
tumor	11_225196	11_413288	0.311181	3.81464	0.000352583	0.222929	SIGIRR	no CpG island	no promoter	48	8	0
tumor	9_815682	9_975762	0.151365	3.81155	0.000356071	0.223256	no gene	no CpG island	DMRT3	30	20	6
tumor	9_826585	9_990602	0.122061	3.81138	0.000356267	0.223256	DMRT3	no CpG island	no promoter	9	25	22
tumor	9_815682	9_970549	0.148526	3.80957	0.000358324	0.223552	no gene	known CpG island	no promoter	30	20	6
normal	19_49267882	19_50145731	0.0450663	4.16349	0.000211047	0.223772	SCAF1	known CpG island	SCAF1	32	2	1
tumor	19_49267882	19_49925894	0.118725	3.80572	0.00036274	0.22531	PTH2	known CpG island	CTD-3148I10.1	48	5	3
tumor	5_1288547	5_1430434	0.059653	3.80091	0.000368324	0.22672	SLC6A3	no CpG island	no promoter	2	17	37
tumor	X_70022420	X_70288304	0.144491	3.79879	0.000370821	0.22672	no gene	known CpG island	no promoter	7	27	22
tumor	19_49267882	19_48956168	-0.12836	-3.79711	0.000372804	0.22672	GRWD1	known CpG island	no promoter	48	5	3
tumor	5_1286516	5_872230	-0.101346	-3.79664	0.000373366	0.22672	BRD9	no CpG island	no promoter	7	29	20
tumor	9_876418	9_505706	0.0860428	3.79603	0.000374088	0.22672	KANK1	known CpG island	no promoter	33	17	6
tumor	11_225196	11_507757	0.0945375	3.79555	0.000374659	0.22672	no gene	known CpG island	no promoter	48	8	0
normal	X_131312089	X_132092323	0.138703	4.15314	0.000217401	0.22726	HS6ST2	known CpG island	no promoter	14	18	3
normal	19_49267882	19_49559679	0.103387	4.15019	0.000219246	0.22726	CGB7	known CpG island	no promoter	32	2	1
normal	19_49267882	19_49559679	0.103387	4.15019	0.000219246	0.22726	NTF4	known CpG island	no promoter	32	2	1
normal	11_225196	11_501551	-0.088863	-4.14707	0.00022121	0.22726	RNH1	no CpG island	no promoter	30	5	0
normal	9_876418	9_843069	0.055739	4.14582	0.000222008	0.22726	DMRT1	known CpG island	no promoter	19	12	4
normal	19_49267882	19_49828787	-0.0424944	-4.14564	0.000222118	0.22726	no gene	no CpG island	no promoter	32	2	1
normal	11_32370380	11_33061893	0.0621027	4.14344	0.000223523	0.22726	TCP11L1	no CpG island	TCP11L1	30	5	0
tumor	9_876418	9_973559	-0.177434	-3.79321	0.000377453	0.227435	no gene	no CpG island	no promoter	33	17	6
normal	5_1288547	5_1878763	-0.0509289	-4.13661	0.000227936	0.228999	IRX4	known CpG island	no promoter	2	13	20
normal	11_225196	11_599079	-0.0646814	-4.13602	0.000228318	0.228999	PHRF1	no CpG island	no promoter	30	5	0
tumor	5_1283755	5_1802292	0.0717395	3.78859	0.000383032	0.229476	NDUFS6	no CpG island	NDUFS6	36	17	3
tumor	5_1283755	5_622949	-0.0648683	-3.78749	0.000384364	0.229476	CEP72	no CpG island	no promoter	36	17	3
tumor	9_876418	9_505689	0.0663966	3.78503	0.000387386	0.229476	KANK1	known CpG island	no promoter	33	17	6
tumor	9_815682	9_969785	0.164827	3.78439	0.000388164	0.229476	no gene	known CpG island	no promoter	30	20	6
tumor	11_225196	11_537110	0.236022	3.78373	0.000388978	0.229476	HRAS	known CpG island	LRRC56	48	8	0
tumor	11_225196	11_943690	-0.0535467	-3.78021	0.000393346	0.229573	AP2A2	no CpG island	no promoter	48	8	0
tumor	11_225196	11_1010493	-0.120293	-3.77869	0.000395246	0.229573	AP2A2	known CpG island	no promoter	48	8	0
tumor	2_11721535	2_11627409	0.24053	3.7786	0.000395358	0.229573	no gene	no CpG island	no promoter	25	23	8
tumor	9_815682	9_974731	0.174079	3.77837	0.000395655	0.229573	no gene	no CpG island	no promoter	30	20	6
tumor	19_49267882	19_50093658	0.0187162	3.77589	0.000398769	0.230431	PRRG2	known CpG island	PRR12	48	5	3
normal	1_22450487	1_22843434	-0.0389267	-4.12999	0.000232291	0.230977	ZBTB40	no CpG island	ZBTB40-IT1	23	12	0
normal	11_225196	11_320578	0.0766342	4.12833	0.000233403	0.230977	RP11-326C3.11	no CpG island	RP11-326C3.10	30	5	0
normal	11_225196	11_320578	0.0766342	4.12833	0.000233403	0.230977	IFITM3	no CpG island	RP11-326C3.10	30	5	0
normal	5_1288547	5_1335515	0.0595105	4.12529	0.000235438	0.231448	CLPTM1L	no CpG island	no promoter	2	13	20
tumor	5_1286516	5_497510	0.0894873	3.77301	0.000402425	0.231595	SLC9A3	no CpG island	no promoter	7	29	20
tumor	5_1288547	5_759547	-0.206341	-3.77085	0.000405196	0.23213	ZDHHC11	no CpG island	no promoter	2	17	37
tumor	5_1288547	5_759547	-0.206341	-3.77085	0.000405196	0.23213	ZDHHC11B	no CpG island	no promoter	2	17	37
tumor	11_225196	11_1084346	-0.179073	-3.76972	0.000406648	0.23213	MUC2	no CpG island	no promoter	48	8	0
tumor	9_802228	9_974795	0.18662	3.76835	0.000408405	0.232193	no gene	no CpG island	no promoter	7	27	22
normal	5_1288547	5_1809934	0.0747491	4.12163	0.000237913	0.232342	NDUFS6	no CpG island	no promoter	2	13	20
tumor	11_35085453	11_35442203	0.1171	3.76549	0.00041212	0.233287	RP4-683L5.1	no CpG island	no promoter	19	21	16
tumor	10_105674854	10_105378408	0.118711	3.76088	0.000418175	0.233287	SH3PXD2A	no CpG island	no promoter	8	10	38
tumor	5_1286516	5_1881829	-0.117597	-3.75932	0.000420255	0.233287	IRX4	no CpG island	no promoter	7	29	20
tumor	5_1288547	5_945838	-0.231102	-3.75897	0.000420712	0.233287	no gene	no CpG island	RP11-661C8.2	2	17	37
tumor	3_169514585	3_169492018	-0.12753	-3.75815	0.000421806	0.233287	MYNN	no CpG island	no promoter	25	23	8
tumor	11_35085453	11_34285444	0.08953	3.75814	0.000421814	0.233287	ABTB2	no CpG island	no promoter	19	21	16
tumor	11_32459923	11_32913079	-0.194488	-3.756	0.000424687	0.233287	no gene	no CpG island	QSER1	32	24	0
tumor	11_225196	11_833552	0.0402417	3.755	0.00042603	0.233287	CD151	known CpG island	CD151	48	8	0
tumor	9_876418	9_686301	0.185243	3.7547	0.000426426	0.233287	KANK1	no CpG island	no promoter	33	17	6
tumor	11_35085453	11_34426751	0.100792	3.75437	0.000426875	0.233287	no gene	no CpG island	no promoter	19	21	16
tumor	10_105674854	10_106075176	0.0445847	3.75296	0.000428787	0.233427	ITPRIP	known CpG island	no promoter	8	10	38
normal	11_225196	11_822397	-0.0538867	-4.11719	0.000240957	0.233777	PNPLA2	no CpG island	no promoter	30	5	0
normal	9_684160	9_974719	0.106761	4.11375	0.000243335	0.233825	no gene	no CpG island	no promoter	21	10	4
normal	X_70022420	X_70150722	-0.104584	-4.11073	0.000245442	0.233825	SLC7A3	known CpG island	no promoter	5	15	15
normal	5_1283755	5_1510474	0.0778619	4.11032	0.000245732	0.233825	LPCAT1	no CpG island	no promoter	18	14	3
tumor	9_815682	9_972908	0.147915	3.74867	0.000434636	0.23409	no gene	known CpG island	no promoter	30	20	6
tumor	12_46798900	12_47219510	-0.120192	-3.74835	0.000435068	0.23409	SLC38A4	no CpG island	no promoter	16	28	12
tumor	9_876418	9_973416	-0.177094	-3.74602	0.000438282	0.23409	no gene	no CpG island	no promoter	33	17	6
tumor	5_1286516	5_570685	-0.142677	-3.74569	0.000438749	0.23409	no gene	no CpG island	no promoter	7	29	20
tumor	X_131626317	X_131157495	0.258758	3.74412	0.000440922	0.23409	MST4	known CpG island	MST4	35	21	0
tumor	5_1283755	5_1073810	-0.113563	-3.74343	0.000441879	0.23409	SLC12A7	known CpG island	no promoter	36	17	3
tumor	10_105674854	10_105319076	0.104458	3.74291	0.000442612	0.23409	NEURL	no CpG island	no promoter	8	10	38
tumor	3_169514585	3_169122836	-0.243874	-3.74004	0.000446632	0.23409	MECOM	no CpG island	no promoter	25	23	8
tumor	1_22450487	1_22165639	0.116634	3.73896	0.000448163	0.23409	HSPG2	no CpG island	no promoter	40	15	1
tumor	11_225196	11_507720	0.0595015	3.73849	0.000448829	0.23409	no gene	known CpG island	no promoter	48	8	0
tumor	11_32370380	11_32847522	-0.140939	-3.73806	0.000449438	0.23409	no gene	no CpG island	no promoter	48	8	0
tumor	5_1288547	5_1840361	0.205295	3.73771	0.000449927	0.23409	no gene	no CpG island	no promoter	2	17	37
tumor	9_876418	9_547144	0.0587643	3.73537	0.000453255	0.234129	KANK1	no CpG island	RP11-31F19.1	33	17	6
tumor	X_131626317	X_132091146	-0.109056	-3.73396	0.000455287	0.234129	HS6ST2	known CpG island	no promoter	35	21	0
tumor	9_876418	9_1051529	-0.133497	-3.73302	0.000456637	0.234129	DMRT2	no CpG island	no promoter	33	17	6
tumor	12_46798900	12_47219956	-0.171453	-3.73186	0.000458303	0.234129	SLC38A4	no CpG island	no promoter	16	28	12
tumor	11_35085453	11_35442003	0.0588822	3.73087	0.000459734	0.234129	RP4-683L5.1	no CpG island	no promoter	19	21	16
tumor	2_11721535	2_11759016	-0.128575	-3.73071	0.000459966	0.234129	GREB1	known CpG island	no promoter	25	23	8
tumor	19_22652436	19_22817039	0.0210124	3.7275	0.000464648	0.235662	no gene	no CpG island	ZNF492	37	15	4
normal	5_1286516	5_1282413	0.162648	4.1051	0.000249423	0.235826	TERT	no CpG island	no promoter	6	22	7
tumor	19_49267882	19_48994772	0.0221024	3.72611	0.000466674	0.235841	LMTK3	no CpG island	no promoter	48	5	3
tumor	11_35085453	11_34457835	0.106024	3.72058	0.00047487	0.238728	no gene	no CpG island	no promoter	19	21	16
tumor	X_70093038	X_70775891	0.102868	3.71998	0.000475773	0.238728	OGT	no CpG island	no promoter	9	37	10
tumor	9_684160	9_1048520	0.137458	3.71828	0.00047832	0.239155	no gene	no CpG island	DMRT2	28	17	11
normal	10_105674854	10_106097942	-0.0791855	-4.09521	0.000256572	0.241049	ITPRIP	known CpG island	no promoter	2	8	25
tumor	12_46798900	12_46661418	-0.0653493	-3.71183	0.000488124	0.241454	SLC38A1	known CpG island	no promoter	16	28	12
tumor	6_152684585	6_152640286	-0.179646	-3.71158	0.00048851	0.241454	SYNE1	no CpG island	no promoter	28	25	3
tumor	11_35085453	11_35439905	0.11487	3.71064	0.000489946	0.241454	SLC1A2	no CpG island	RP4-683L5.1	19	21	16
tumor	X_70149078	X_69656146	0.158629	3.7101	0.000490791	0.241454	no gene	no CpG island	no promoter	21	26	9
tumor	19_49267882	19_48949152	0.0296234	3.70543	0.000498034	0.241454	GRWD1	known CpG island	GRWD1	48	5	3
tumor	19_49267882	19_50181502	0.022882	3.70397	0.000500333	0.241454	PRMT1	no CpG island	no promoter	48	5	3
tumor	9_876418	9_505721	0.0814792	3.7033	0.000501379	0.241454	KANK1	known CpG island	no promoter	33	17	6
tumor	5_1288547	5_1255546	0.213165	3.70107	0.000504901	0.241454	TERT	no CpG island	no promoter	2	17	37
tumor	6_152546094	6_153452913	-0.0250672	-3.69883	0.000508461	0.241454	no gene	no CpG island	no promoter	7	24	25
tumor	11_35085453	11_35161527	0.0411483	3.69881	0.0005085	0.241454	CD44	no CpG island	no promoter	19	21	16
tumor	10_105674854	10_106075387	0.0740492	3.6986	0.000508828	0.241454	ITPRIP	no CpG island	no promoter	8	10	38
tumor	5_1286516	5_1495457	0.0483164	3.6979	0.000509949	0.241454	LPCAT1	no CpG island	no promoter	7	29	20
tumor	5_1288547	5_1108262	0.111091	3.69781	0.0005101	0.241454	SLC12A7	no CpG island	no promoter	2	17	37
tumor	11_225196	11_518734	0.0376481	3.69684	0.000511645	0.241454	no gene	known CpG island	no promoter	48	8	0
tumor	9_815682	9_973660	0.172021	3.69631	0.000512496	0.241454	no gene	no CpG island	no promoter	30	20	6
tumor	11_35085453	11_35547909	0.134552	3.69457	0.000515303	0.241454	PAMR1	no CpG island	no promoter	19	21	16
tumor	9_876418	9_969548	-0.166263	-3.69343	0.000517145	0.241454	no gene	known CpG island	no promoter	33	17	6
tumor	5_1288547	5_2137304	-0.164971	-3.69332	0.000517322	0.241454	no gene	known CpG island	no promoter	2	17	37
tumor	X_70149078	X_70356449	-0.103991	-3.69291	0.000517991	0.241454	MED12	no CpG island	no promoter	21	26	9
tumor	5_1283755	5_475279	0.104568	3.69265	0.000518414	0.241454	CTD-2228K2.7	known CpG island	no promoter	36	17	3
tumor	5_1283755	5_475279	0.104568	3.69265	0.000518414	0.241454	SLC9A3	known CpG island	no promoter	36	17	3
tumor	6_152593102	6_153451867	0.0604063	3.69133	0.000520566	0.241454	RGS17	known CpG island	no promoter	17	31	8
tumor	6_152562271	6_152623306	0.0218417	3.69067	0.000521641	0.241454	SYNE1	known CpG island	no promoter	34	20	2
tumor	11_108168995	11_107462390	0.021336	3.68997	0.000522793	0.241454	ELMOD1	known CpG island	ELMOD1	34	20	2
tumor	11_108168995	11_107462390	0.021336	3.68997	0.000522793	0.241454	ELMOD1	known CpG island	AP000889.3	34	20	2
tumor	5_1288547	5_1891892	0.177066	3.68915	0.000524129	0.241454	CTD-2194D22.4	no CpG island	no promoter	2	17	37
tumor	2_67090367	2_66660842	0.0432323	3.68814	0.000525802	0.241454	MEIS1	no CpG island	MEIS1	50	6	0
tumor	9_815682	9_975015	0.175699	3.68661	0.000528327	0.241454	no gene	no CpG island	DMRT3	30	20	6
tumor	9_815682	9_975133	0.167048	3.68611	0.000529154	0.241454	no gene	no CpG island	DMRT3	30	20	6
tumor	19_49267882	19_48866357	0.0203086	3.68417	0.000532367	0.242136	TMEM143	no CpG island	SYNGR4	48	5	3
tumor	12_46831129	12_46844645	0.115886	3.68307	0.000534211	0.242193	RP11-96H19.1	no CpG island	no promoter	11	22	23
normal	11_225196	11_558740	-0.182844	-4.08923	0.000260984	0.242197	C11orf35	no CpG island	RASSF7	30	5	0
normal	11_225196	11_558740	-0.182844	-4.08923	0.000260984	0.242197	RP11-496I9.1	no CpG island	RASSF7	30	5	0
normal	3_128122820	3_127634063	0.0440352	4.08914	0.000261057	0.242197	no gene	known CpG island	KBTBD12	20	10	5
tumor	5_1283755	5_1060648	-0.0422448	-3.68075	0.000538098	0.24283	SLC12A7	known CpG island	no promoter	36	17	3
tumor	9_876418	9_973553	-0.177092	-3.68018	0.000539059	0.24283	no gene	no CpG island	no promoter	33	17	6
tumor	9_876418	9_970448	-0.175326	-3.67629	0.000545674	0.243043	no gene	known CpG island	no promoter	33	17	6
tumor	5_176450837	5_175874896	0.0159534	3.67558	0.00054688	0.243043	FAF2	known CpG island	FAF2	4	40	12
tumor	22_40669648	22_39884392	-0.0223446	-3.67544	0.000547126	0.243043	MGAT3	known CpG island	no promoter	27	25	4
tumor	1_22450487	1_21917444	-0.258852	-3.67486	0.000548109	0.243043	RP11-63N8.3	no CpG island	no promoter	40	15	1
tumor	11_35085453	11_35052388	0.0513302	3.67465	0.000548481	0.243043	no gene	no CpG island	no promoter	19	21	16
tumor	5_1288547	5_1444746	-0.0778202	-3.67383	0.000549874	0.243043	SLC6A3	known CpG island	no promoter	2	17	37
tumor	5_1283755	5_1097654	-0.107832	-3.6721	0.000552857	0.243597	SLC12A7	no CpG island	no promoter	36	17	3
tumor	5_1286516	5_300901	-0.0642196	-3.67002	0.000556479	0.244039	PDCD6	no CpG island	no promoter	7	29	20
tumor	11_225196	11_829616	0.375495	3.66953	0.000557322	0.244039	AP006621.8	known CpG island	no promoter	48	8	0
tumor	11_225196	11_829616	0.375495	3.66953	0.000557322	0.244039	EFCAB4A	known CpG island	no promoter	48	8	0
normal	11_32368744	11_32851906	0.0690665	4.08405	0.000264871	0.24421	PRRG4	known CpG island	PRRG4	13	18	4
tumor	11_225196	11_915440	-0.113003	-3.6672	0.000561396	0.245062	no gene	no CpG island	no promoter	48	8	0
tumor	9_815682	9_971544	0.180167	3.6621	0.000570406	0.24677	no gene	known CpG island	no promoter	30	20	6
tumor	5_1288547	5_1318853	0.0548413	3.66137	0.000571716	0.24677	CLPTM1L	no CpG island	no promoter	2	17	37
tumor	X_131171122	X_130215852	0.145111	3.66115	0.000572108	0.24677	ARHGAP36	no CpG island	no promoter	36	15	5
tumor	11_32459923	11_33062060	-0.090769	-3.66104	0.00057231	0.24677	TCP11L1	no CpG island	no promoter	32	24	0
normal	1_22450487	1_22238818	0.34014	4.07818	0.000269351	0.246807	HSPG2	no CpG island	no promoter	23	12	0
tumor	9_876418	9_971556	-0.148148	-3.65711	0.000579364	0.24905	no gene	known CpG island	no promoter	33	17	6
normal	9_684160	9_974530	0.152233	4.07201	0.000274127	0.249642	no gene	no CpG island	no promoter	21	10	4
normal	22_40669648	22_39916092	0.0289257	4.06644	0.000278515	0.251147	ATF4	known CpG island	ATF4	17	15	3
normal	6_152546094	6_152129227	-0.0262021	-4.06563	0.000279163	0.251147	ESR1	known CpG island	no promoter	7	13	15
tumor	1_22450487	1_23276587	0.139636	3.65238	0.000587979	0.251986	no gene	no CpG island	no promoter	40	15	1
tumor	1_22507684	1_23280325	0.264456	3.65006	0.000592247	0.252287	LACTBL1	known CpG island	no promoter	32	24	0
tumor	9_815682	9_973022	0.160778	3.64956	0.000593175	0.252287	no gene	known CpG island	no promoter	30	20	6
tumor	6_152543949	6_152502079	-0.167733	-3.64908	0.00059405	0.252287	SYNE1	no CpG island	no promoter	24	30	2
tumor	9_876418	9_970433	-0.157611	-3.64529	0.00060112	0.254523	no gene	known CpG island	no promoter	33	17	6
tumor	11_225196	11_473627	-0.077895	-3.6427	0.000605976	0.254753	PTDSS2	no CpG island	no promoter	48	8	0
tumor	5_1286516	5_2156242	-0.104788	-3.64224	0.000606855	0.254753	no gene	no CpG island	no promoter	7	29	20
tumor	4_70634441	4_70713430	-0.0570448	-3.64212	0.000607085	0.254753	SULT1E1	no CpG island	no promoter	29	16	11
normal	2_11721535	2_11889028	-0.0503257	-4.05839	0.000284981	0.254836	LPIN1	no CpG island	no promoter	14	15	6
normal	11_225196	11_318911	0.0474359	4.05413	0.000288458	0.255377	RP11-326C3.11	known CpG island	RP11-326C3.11	30	5	0
normal	19_49267882	19_50247397	-0.0407016	-4.04977	0.000292066	0.255377	TSKS	no CpG island	no promoter	32	2	1
normal	X_70093038	X_70797867	0.120826	4.0496	0.000292207	0.255377	no gene	no CpG island	ACRC	7	21	7
normal	12_46831129	12_46122635	-0.0254871	-4.04928	0.000292467	0.255377	no gene	known CpG island	ARID2	5	14	16
tumor	9_815682	9_974476	0.204652	3.63977	0.000611534	0.255859	no gene	no CpG island	no promoter	30	20	6
normal	19_49267882	19_49938204	-0.0680526	-4.04558	0.000295566	0.256451	SLC17A7	no CpG island	no promoter	32	2	1
normal	11_225196	11_889187	-0.0383333	-4.0417	0.000298853	0.256451	CHID1	no CpG island	no promoter	30	5	0
normal	19_49267882	19_49129483	-0.0917526	-4.04142	0.000299089	0.256451	SPHK2	no CpG island	no promoter	32	2	1
normal	16_51481596	16_50897282	-0.0133929	-4.03964	0.000300608	0.256451	CTD-2034I21.1	no CpG island	no promoter	26	8	1
tumor	2_11721535	2_12609372	0.0521299	3.63509	0.0006205	0.257719	AC096559.1	no CpG island	no promoter	25	23	8
tumor	11_225196	11_695537	0.0260463	3.63493	0.000620818	0.257719	DEAF1	known CpG island	TMEM80	48	8	0
tumor	11_225196	11_695537	0.0260463	3.63493	0.000620818	0.257719	EPS8L2	known CpG island	TMEM80	48	8	0
tumor	11_225196	11_695537	0.0260463	3.63493	0.000620818	0.257719	TMEM80	known CpG island	TMEM80	48	8	0
tumor	5_1283755	5_1105432	-0.0285202	-3.6346	0.000621463	0.257719	SLC12A7	no CpG island	no promoter	36	17	3
normal	19_49267882	19_50098053	-0.218953	-4.03429	0.000305217	0.258324	PRR12	known CpG island	no promoter	32	2	1
normal	11_107999907	11_108122617	-0.123921	-4.03306	0.000306283	0.258324	ATM	no CpG island	no promoter	31	4	0
tumor	9_802228	9_974719	0.14938	3.63148	0.00062752	0.259346	no gene	no CpG island	no promoter	7	27	22
tumor	6_152684585	6_153074960	-0.14845	-3.63064	0.000629161	0.259346	VIP	no CpG island	no promoter	28	25	3
tumor	11_35085453	11_35547797	0.112279	3.62975	0.000630905	0.259346	PAMR1	no CpG island	no promoter	19	21	16
tumor	5_1283755	5_1804656	0.154945	3.62852	0.000633323	0.259583	NDUFS6	no CpG island	no promoter	36	17	3
tumor	9_802228	9_975291	0.152744	3.62729	0.000635739	0.259818	no gene	no CpG island	DMRT3	7	27	22
normal	11_225196	11_980501	-0.0580856	-4.02789	0.000310823	0.260465	AP2A2	known CpG island	no promoter	30	5	0
normal	5_1283755	5_1510464	0.075986	4.02619	0.000312332	0.260465	LPCAT1	no CpG island	no promoter	18	14	3
tumor	5_1283755	5_1857549	-0.156192	-3.62455	0.000641169	0.26128	no gene	known CpG island	no promoter	36	17	3
tumor	3_128122820	3_127395187	-0.0424988	-3.62299	0.000644298	0.261421	ABTB1	no CpG island	no promoter	35	16	5
tumor	16_51481596	16_50744858	-0.124956	-3.62252	0.000645223	0.261421	NOD2	no CpG island	RP11-327F22.6	46	9	1
normal	5_1283755	5_613000	0.0455843	4.02273	0.000315419	0.261571	CEP72	no CpG island	CEP72	18	14	3
normal	X_131626317	X_131622831	0.158324	4.01994	0.000317927	0.262186	MBNL3	no CpG island	no promoter	25	10	0
tumor	22_40669648	22_39827600	-0.194654	-3.61891	0.000652501	0.263612	TAB1	no CpG island	no promoter	27	25	4
normal	9_684160	9_114022	0.0376073	4.01482	0.000322592	0.264563	no gene	known CpG island	no promoter	21	10	4
normal	6_152593102	6_152555112	-0.245897	-4.01196	0.000325218	0.265251	SYNE1	no CpG island	no promoter	15	16	4
tumor	5_176450837	5_175815383	0.0174513	3.61507	0.00066032	0.266009	ARL10	known CpG island	HIGD2A	4	40	12
tumor	5_176450837	5_175815383	0.0174513	3.61507	0.00066032	0.266009	NOP16	known CpG island	HIGD2A	4	40	12
normal	X_131171122	X_132095360	0.128491	4.00713	0.000329713	0.266019	HS6ST2	no CpG island	no promoter	18	14	3
normal	19_49267882	19_48775009	0.0289687	4.00519	0.000331533	0.266019	ZNF114	known CpG island	no promoter	32	2	1
normal	19_49267882	19_49991271	0.0306459	4.00445	0.000332236	0.266019	RPL13A	known CpG island	RPL13A	32	2	1
normal	19_49267882	19_49991271	0.0306459	4.00445	0.000332236	0.266019	RPL13A	known CpG island	SNORD32A	32	2	1
normal	5_1286516	5_1277576	-0.273806	-4.00329	0.000333328	0.266019	TERT	known CpG island	no promoter	6	22	7
normal	19_49267882	19_49644495	-0.0495845	-3.99785	0.000338513	0.268607	PPFIA3	no CpG island	no promoter	32	2	1
normal	19_22652436	19_23254024	0.0464086	3.99611	0.00034019	0.268607	CTD-2291D10.3	known CpG island	no promoter	28	5	2
tumor	5_1283755	5_1332573	0.114028	3.60942	0.000672006	0.269946	CLPTM1L	no CpG island	no promoter	36	17	3
tumor	6_152684585	6_153452685	0.0524288	3.60534	0.000680553	0.271759	no gene	known CpG island	no promoter	28	25	3
tumor	1_22507684	1_22902733	0.187704	3.60502	0.000681227	0.271759	EPHA8	no CpG island	no promoter	32	24	0
tumor	11_225196	11_842538	0.0363636	3.60451	0.000682304	0.271759	POLR2L	known CpG island	TSPAN4	48	8	0
normal	11_225196	11_236962	0.05	3.98882	0.000347298	0.271803	PSMD13	known CpG island	PSMD13	30	5	0
normal	5_1286516	5_501367	0.171765	3.98711	0.000348987	0.271803	SLC9A3	no CpG island	no promoter	6	22	7
normal	11_35085453	11_35724217	-0.0362286	-3.98636	0.000349731	0.271803	TRIM44	no CpG island	no promoter	8	18	9
tumor	19_49267882	19_49298590	0.0238068	3.60284	0.000685833	0.27212	BCAT2	known CpG island	no promoter	48	5	3
tumor	11_32370380	11_33037845	0.0341626	3.60121	0.000689307	0.27212	DEPDC7	known CpG island	DEPDC7	48	8	0
tumor	9_802228	9_969616	0.15299	3.60061	0.000690582	0.27212	no gene	known CpG island	no promoter	7	27	22
tumor	11_35085453	11_35638398	0.0301529	3.59992	0.000692073	0.27212	no gene	no CpG island	FJX1	19	21	16
tumor	22_40669648	22_41186071	-0.264921	-3.59955	0.000692859	0.27212	SLC25A17	no CpG island	no promoter	27	25	4
tumor	5_176450837	5_176023203	-0.0382645	-3.59732	0.000697663	0.273245	GPRIN1	no CpG island	no promoter	4	40	12
tumor	19_49267882	19_49468504	0.0685439	3.59542	0.00070177	0.273786	no gene	known CpG island	FTL	48	5	3
tumor	9_815682	9_975325	0.184446	3.59387	0.000705148	0.273786	no gene	no CpG island	DMRT3	30	20	6
tumor	19_49267882	19_50027941	-0.0877178	-3.59322	0.000706564	0.273786	FCGRT	known CpG island	no promoter	48	5	3
tumor	5_176450837	5_176037397	0.040262	3.59311	0.00070681	0.273786	no gene	known CpG island	no promoter	4	40	12
normal	5_1283755	5_1085496	-0.0456884	-3.98158	0.000354504	0.274078	SLC12A7	known CpG island	no promoter	18	14	3
tumor	19_49267882	19_49999758	0.0347863	3.59108	0.000711258	0.274754	RPS11	known CpG island	RPS11	48	5	3
tumor	19_49267882	19_49999758	0.0347863	3.59108	0.000711258	0.274754	RPS11	known CpG island	SNORD35B	48	5	3
tumor	11_35085453	11_35993771	0.118883	3.58915	0.000715521	0.275016	LDLRAD3	no CpG island	RP5-916O11.2	19	21	16
tumor	9_802228	9_974981	0.173901	3.589	0.000715837	0.275016	no gene	no CpG island	DMRT3	7	27	22
tumor	5_1283755	5_1320722	-0.247853	-3.5872	0.000719834	0.275243	CLPTM1L	no CpG island	no promoter	36	17	3
tumor	19_49267882	19_50143931	0.0293668	3.58698	0.000720332	0.275243	no gene	known CpG island	SCAF1	48	5	3
tumor	9_876418	9_1048779	-0.115303	-3.58463	0.000725586	0.275991	no gene	no CpG island	DMRT2	33	17	6
tumor	6_152562271	6_151772946	0.0183366	3.58435	0.000726205	0.275991	RMND1	no CpG island	C6orf211	34	20	2
tumor	9_815682	9_975543	0.194422	3.58303	0.000729183	0.276378	no gene	no CpG island	DMRT3	30	20	6
normal	9_684160	9_972902	0.1423	3.97671	0.000359438	0.276452	no gene	known CpG island	no promoter	21	10	4
tumor	11_35085453	11_35547870	0.0460922	3.58183	0.000731882	0.276657	PAMR1	no CpG island	no promoter	19	21	16
normal	9_684160	9_974774	0.118482	3.97397	0.00036224	0.277172	no gene	no CpG island	no promoter	21	10	4
normal	11_32370380	11_33037302	0.199365	3.97085	0.000365454	0.278197	no gene	known CpG island	DEPDC7	30	5	0
tumor	2_67090367	2_67624749	0.106924	3.57542	0.000746518	0.278996	ETAA1	known CpG island	ETAA1	50	6	0
tumor	19_49267882	19_48953925	-0.0651424	-3.57495	0.000747597	0.278996	GRWD1	no CpG island	no promoter	48	5	3
tumor	11_108168995	11_107436518	0.0103098	3.57454	0.000748529	0.278996	no gene	no CpG island	no promoter	34	20	2
tumor	3_169514585	3_170372264	-0.0393259	-3.57305	0.000751985	0.278996	CLDN11	no CpG island	no promoter	25	23	8
tumor	9_815682	9_975600	0.137583	3.57278	0.000752622	0.278996	no gene	no CpG island	DMRT3	30	20	6
tumor	5_1283755	5_1333674	-0.0563707	-3.5726	0.000753029	0.278996	CLPTM1L	no CpG island	no promoter	36	17	3
tumor	3_128122820	3_128206781	0.0307016	3.57234	0.00075363	0.278996	GATA2	known CpG island	RP11-475N22.4	35	16	5
tumor	9_815682	9_974719	0.145298	3.57223	0.000753898	0.278996	no gene	no CpG island	no promoter	30	20	6
tumor	11_35085453	11_35638416	0.0240735	3.57065	0.00075756	0.279617	no gene	no CpG island	FJX1	19	21	16
tumor	5_176450837	5_176875297	-0.0865201	-3.56663	0.000767023	0.282345	PRR7	no CpG island	no promoter	4	40	12
tumor	9_876418	9_974162	-0.147233	-3.56581	0.000768956	0.282345	no gene	no CpG island	no promoter	33	17	6
tumor	2_67090367	2_66802610	0.0523781	3.56379	0.000773768	0.283262	AC007392.3	no CpG island	no promoter	50	6	0
tumor	1_22450487	1_22351860	0.0173209	3.56203	0.000777951	0.283262	LINC00339	no CpG island	LINC00339	40	15	1
tumor	9_684160	9_975600	0.11964	3.56195	0.000778156	0.283262	no gene	no CpG island	DMRT3	28	17	11
tumor	11_35085453	11_35052392	0.0278933	3.56062	0.000781354	0.283262	no gene	no CpG island	no promoter	19	21	16
tumor	9_802228	9_970119	0.170004	3.55952	0.000783992	0.283262	no gene	known CpG island	no promoter	7	27	22
tumor	X_131626317	X_132550736	-0.150597	-3.55942	0.000784247	0.283262	no gene	no CpG island	no promoter	35	21	0
tumor	19_49267882	19_49956732	0.0097706	3.55859	0.000786248	0.283262	PIH1D1	known CpG island	ALDH16A1	48	5	3
tumor	19_49267882	19_49956732	0.0097706	3.55859	0.000786248	0.283262	ALDH16A1	known CpG island	ALDH16A1	48	5	3
tumor	9_815682	9_216064	-0.0151777	-3.55806	0.000787526	0.283262	DOCK8	no CpG island	no promoter	30	20	6
tumor	19_49267882	19_48837218	0.0233521	3.55696	0.000790192	0.283498	TMEM143	known CpG island	no promoter	48	5	3
tumor	11_108354102	11_107711742	0.132612	3.55566	0.00079336	0.283912	SLC35F2	no CpG island	no promoter	19	28	9
tumor	9_802228	9_972400	0.100242	3.55288	0.000800185	0.284933	no gene	known CpG island	no promoter	7	27	22
tumor	2_11721535	2_11674414	-0.0436218	-3.5517	0.000803084	0.284933	GREB1	no CpG island	GREB1	25	23	8
tumor	11_225196	11_298757	-0.38444	-3.55118	0.000804386	0.284933	IFITM5	no CpG island	no promoter	48	8	0
tumor	9_815682	9_973026	0.143047	3.55112	0.000804515	0.284933	no gene	known CpG island	no promoter	30	20	6
tumor	12_46798900	12_47224913	-0.0536912	-3.55005	0.000807185	0.284933	SLC38A4	known CpG island	no promoter	16	28	12
tumor	9_876418	9_970578	-0.146696	-3.54806	0.000812127	0.284933	no gene	known CpG island	no promoter	33	17	6
tumor	6_152593102	6_152701689	-0.0226599	-3.54772	0.000812986	0.284933	SYNE1	no CpG island	SYNE1-AS1	17	31	8
tumor	6_152593102	6_152701689	-0.0226599	-3.54772	0.000812986	0.284933	SYNE1-AS1	no CpG island	SYNE1-AS1	17	31	8
tumor	6_152546094	6_153324902	0.0677869	3.54766	0.000813119	0.284933	no gene	no CpG island	no promoter	7	24	25
tumor	1_22507684	1_21949306	0.1844	3.54715	0.000814399	0.284933	RAP1GAP	no CpG island	no promoter	32	24	0
normal	5_176450837	5_176755511	0.132762	3.96042	0.000376414	0.285078	no gene	no CpG island	no promoter	2	22	11
tumor	11_225196	11_559095	-0.222606	-3.5461	0.000817026	0.285144	C11orf35	no CpG island	RASSF7	48	8	0
tumor	11_225196	11_559095	-0.222606	-3.5461	0.000817026	0.285144	RP11-496I9.1	no CpG island	RASSF7	48	8	0
tumor	X_70149078	X_70470375	0.100521	3.54308	0.000824657	0.287097	ZMYM3	no CpG island	no promoter	21	26	9
normal	9_876418	9_113114	0.0885392	3.95335	0.000384022	0.289363	RP11-143M1.4	known CpG island	no promoter	19	12	4
tumor	5_1288547	5_1073810	0.115974	3.53811	0.000837316	0.290189	SLC12A7	known CpG island	no promoter	2	17	37
tumor	X_70149078	X_70348785	0.0415887	3.53798	0.000837657	0.290189	MED12	no CpG island	no promoter	21	26	9
tumor	11_32370380	11_32456780	0.0411523	3.53667	0.000841026	0.290642	WT1	known CpG island	WT1-AS	48	8	0
tumor	5_1286516	5_1865424	-0.160221	-3.53579	0.000843305	0.290718	no gene	no CpG island	no promoter	7	29	20
tumor	11_35085453	11_34998645	0.099812	3.53216	0.000852756	0.293259	PDHX	no CpG island	no promoter	19	21	16
tumor	5_1286516	5_1744214	-0.16233	-3.52944	0.000859884	0.293794	no gene	no CpG island	no promoter	7	29	20
tumor	X_131171122	X_130192265	0.192556	3.52921	0.000860502	0.293794	ARHGAP36	known CpG island	ARHGAP36	36	15	5
tumor	19_22652436	19_22778996	0.219989	3.52918	0.000860565	0.293794	no gene	no CpG island	CTC-457E21.3	37	15	4
tumor	12_46798900	12_47481988	-0.0709293	-3.52739	0.000865311	0.294701	PCED1B	no CpG island	no promoter	16	28	12
normal	X_70093038	X_69501106	0.0526904	3.94481	0.00039341	0.294941	ARR3	no CpG island	RAB41	7	21	7
tumor	11_225196	11_1047743	0.317866	3.52593	0.000869192	0.295084	no gene	no CpG island	no promoter	48	8	0
tumor	9_815682	9_975090	0.151219	3.52351	0.000875664	0.295084	no gene	no CpG island	DMRT3	30	20	6
tumor	6_152546094	6_152135308	0.0529916	3.52343	0.000875865	0.295084	ESR1	no CpG island	no promoter	7	24	25
tumor	6_152546094	6_152135308	0.0529916	3.52343	0.000875865	0.295084	RP3-443C4.2	no CpG island	no promoter	7	24	25
tumor	5_176450837	5_175815572	-0.022725	-3.52308	0.000876807	0.295084	ARL10	known CpG island	HIGD2A	4	40	12
tumor	5_176450837	5_175815572	-0.022725	-3.52308	0.000876807	0.295084	NOP16	known CpG island	HIGD2A	4	40	12
tumor	11_32459923	11_31849194	0.140688	3.52305	0.000876899	0.295084	RCN1	no CpG island	no promoter	32	24	0
normal	19_49267882	19_49956699	0.0498159	3.94247	0.000396021	0.295406	PIH1D1	known CpG island	ALDH16A1	32	2	1
normal	19_49267882	19_49956699	0.0498159	3.94247	0.000396021	0.295406	ALDH16A1	known CpG island	ALDH16A1	32	2	1
tumor	5_1288547	5_1204934	-0.023408	-3.52004	0.000885022	0.296467	SLC6A19	no CpG island	no promoter	2	17	37
tumor	X_70149078	X_70753923	0.110764	3.51996	0.000885214	0.296467	OGT	no CpG island	OGT	21	26	9
tumor	11_108354102	11_107711662	0.139689	3.51759	0.000891677	0.297924	SLC35F2	no CpG island	no promoter	19	28	9
tumor	5_1288547	5_1831280	0.109399	3.51533	0.000897856	0.299279	no gene	no CpG island	no promoter	2	17	37
normal	19_49267882	19_49127475	0.0786982	3.93517	0.000404288	0.300064	SPHK2	known CpG island	no promoter	32	2	1
tumor	9_802228	9_969826	0.150983	3.51243	0.000905865	0.30058	no gene	known CpG island	no promoter	7	27	22
tumor	12_46798900	12_46323656	-0.0837207	-3.51237	0.000906024	0.30058	SCAF11	no CpG island	no promoter	16	28	12
tumor	5_1288547	5_497572	0.114959	3.51131	0.000908962	0.300847	SLC9A3	no CpG island	no promoter	2	17	37
tumor	19_49267882	19_49589224	0.0587291	3.50913	0.000915036	0.302148	SNRNP70	no CpG island	SNRNP70	48	5	3
tumor	19_49267882	19_50059899	-0.138408	-3.50699	0.000921052	0.303424	NOSIP	known CpG island	no promoter	48	5	3
tumor	10_105674854	10_105589165	0.130888	3.50581	0.000924358	0.303804	SH3PXD2A	no CpG island	no promoter	8	10	38
tumor	1_22450487	1_21741896	-0.186981	-3.50439	0.000928396	0.304264	no gene	no CpG island	RP11-293F5.1	40	15	1
tumor	11_225196	11_706533	0.0753344	3.50373	0.000930264	0.304264	DEAF1	known CpG island	no promoter	48	8	0
tumor	11_225196	11_706533	0.0753344	3.50373	0.000930264	0.304264	EPS8L2	known CpG island	no promoter	48	8	0
tumor	19_49267882	19_50016532	0.0167603	3.50253	0.000933665	0.304264	FCGRT	known CpG island	no promoter	48	5	3
tumor	11_108354102	11_107795637	0.126457	3.50228	0.000934392	0.304264	SLC35F2	no CpG island	no promoter	19	28	9
tumor	X_70149078	X_69509782	-0.127885	-3.49944	0.000942516	0.305369	PDZD11	known CpG island	KIF4A	21	26	9
tumor	22_40669648	22_39884987	-0.075979	-3.49869	0.000944686	0.305369	MGAT3	known CpG island	no promoter	27	25	4
tumor	5_176450837	5_176830503	-0.0553152	-3.49808	0.000946454	0.305369	F12	known CpG island	GRK6	4	40	12
tumor	5_176450837	5_176830503	-0.0553152	-3.49808	0.000946454	0.305369	GRK6	known CpG island	GRK6	4	40	12
tumor	X_131312089	X_131154289	0.112624	3.49748	0.000948164	0.305369	no gene	no CpG island	no promoter	21	32	3
tumor	10_105674854	10_106094061	0.121569	3.49733	0.000948613	0.305369	ITPRIP	no CpG island	no promoter	8	10	38
tumor	5_1288547	5_1345838	-0.10149	-3.49583	0.000952974	0.306074	no gene	no CpG island	no promoter	2	17	37
normal	11_225196	11_559095	-0.262336	-3.926	0.000414895	0.306405	C11orf35	no CpG island	RASSF7	30	5	0
normal	11_225196	11_559095	-0.262336	-3.926	0.000414895	0.306405	RP11-496I9.1	no CpG island	RASSF7	30	5	0
tumor	1_22507684	1_22978314	0.116609	3.49347	0.000959838	0.306449	no gene	no CpG island	C1QB	32	24	0
tumor	11_35085453	11_35441975	0.0991502	3.49173	0.00096494	0.306449	RP4-683L5.1	no CpG island	no promoter	19	21	16
tumor	22_40669648	22_39827891	-0.168682	-3.49153	0.000965533	0.306449	TAB1	no CpG island	no promoter	27	25	4
tumor	9_802228	9_974840	0.179869	3.49095	0.000967242	0.306449	no gene	no CpG island	no promoter	7	27	22
tumor	5_1283755	5_456585	0.178908	3.48982	0.000970587	0.306449	EXOC3	no CpG island	no promoter	36	17	3
tumor	6_152684585	6_152126057	-0.14356	-3.4893	0.000972123	0.306449	ESR1	no CpG island	no promoter	28	25	3
tumor	22_40669648	22_41597361	0.122546	3.48774	0.000976743	0.306449	no gene	no CpG island	no promoter	27	25	4
tumor	19_22652436	19_22712004	-0.180115	-3.48726	0.000978175	0.306449	ZNF98	no CpG island	no promoter	37	15	4
tumor	19_49267882	19_49344548	-0.120305	-3.4871	0.000978663	0.306449	PLEKHA4	no CpG island	no promoter	48	5	3
tumor	6_152546094	6_151546973	0.0599095	3.48644	0.000980646	0.306449	RP1-292B18.4	no CpG island	no promoter	7	24	25
tumor	6_152546094	6_151546973	0.0599095	3.48644	0.000980646	0.306449	RP11-613F7.1	no CpG island	no promoter	7	24	25
tumor	9_876418	9_469795	0.0582407	3.48626	0.00098118	0.306449	RP11-165F24.3	no CpG island	KANK1	33	17	6
tumor	1_22450487	1_21900111	-0.176831	-3.48618	0.000981411	0.306449	ALPL	no CpG island	no promoter	40	15	1
tumor	11_32368744	11_33308345	-0.0117164	-3.48585	0.000982396	0.306449	HIPK3	no CpG island	no promoter	16	34	6
tumor	11_32459923	11_33397172	-0.101352	-3.48438	0.000986789	0.30714	no gene	no CpG island	no promoter	32	24	0
tumor	5_1286516	5_1056148	-0.109089	-3.4818	0.000994589	0.308764	SLC12A7	no CpG island	no promoter	7	29	20
tumor	11_225196	11_829666	0.392705	3.4812	0.000996388	0.308764	AP006621.8	known CpG island	no promoter	48	8	0
tumor	11_225196	11_829666	0.392705	3.4812	0.000996388	0.308764	EFCAB4A	known CpG island	no promoter	48	8	0
tumor	9_876418	9_972555	-0.157594	-3.47874	0.00100388	0.310104	no gene	known CpG island	no promoter	33	17	6
tumor	11_32370380	11_31391088	0.0218016	3.47834	0.00100511	0.310104	DCDC1	known CpG island	DNAJC24	48	8	0
tumor	1_22450487	1_21934729	-0.225125	-3.47754	0.00100756	0.310181	RAP1GAP	no CpG island	no promoter	40	15	1
tumor	1_22450487	1_22110667	0.165841	3.47641	0.00101103	0.310571	no gene	no CpG island	no promoter	40	15	1
tumor	13_41179798	13_41745388	-0.0618692	-3.47512	0.001015	0.311113	no gene	no CpG island	no promoter	28	23	5
normal	6_152684585	6_152959260	-0.114136	-3.91799	0.00042439	0.311866	no gene	no CpG island	no promoter	21	11	3
tumor	5_1288547	5_1277576	-0.223527	-3.47317	0.00102103	0.312282	TERT	known CpG island	no promoter	2	17	37
tumor	11_225196	11_421229	-0.152877	-3.47222	0.00102399	0.312509	ANO9	no CpG island	no promoter	48	8	0
tumor	22_40669648	22_40041804	-0.117057	-3.47038	0.00102974	0.313181	CACNA1I	no CpG island	no promoter	27	25	4
tumor	13_41179798	13_41173617	0.135202	3.46991	0.0010312	0.313181	FOXO1	no CpG island	no promoter	28	23	5
tumor	5_1283755	5_1332556	0.106437	3.46939	0.00103285	0.313181	CLPTM1L	no CpG island	no promoter	36	17	3
normal	5_1286516	5_1809350	0.0549571	3.91392	0.000429291	0.313184	NDUFS6	no CpG island	no promoter	6	22	7
normal	11_108354102	11_108370897	0.093202	3.9126	0.000430902	0.313184	no gene	no CpG island	no promoter	10	20	5
normal	11_225196	11_577032	0.073886	3.90814	0.000436352	0.313184	PHRF1	known CpG island	PHRF1	30	5	0
normal	3_128122820	3_127633768	0.112738	3.90718	0.000437537	0.313184	no gene	no CpG island	KBTBD12	20	10	5
normal	5_176450837	5_176730202	-0.0381334	-3.9064	0.000438503	0.313184	RAB24	known CpG island	PRELID1	2	22	11
normal	5_176450837	5_176730202	-0.0381334	-3.9064	0.000438503	0.313184	MXD3	known CpG island	PRELID1	2	22	11
normal	9_815682	9_974692	0.103579	3.9032	0.000442478	0.313184	no gene	no CpG island	no promoter	19	12	4
normal	5_1283755	5_1033977	0.0863116	3.90199	0.000443988	0.313184	NKD2	no CpG island	no promoter	18	14	3
normal	19_49267882	19_49935948	0.289046	3.90139	0.000444744	0.313184	SLC17A7	known CpG island	no promoter	32	2	1
normal	11_32370380	11_31831690	0.0998023	3.90105	0.000445173	0.313184	PAX6	known CpG island	no promoter	30	5	0
tumor	9_815682	9_973778	0.159299	3.46758	0.00103853	0.314047	no gene	no CpG island	no promoter	30	20	6
tumor	9_815682	9_971533	0.156495	3.46692	0.00104061	0.314047	no gene	known CpG island	no promoter	30	20	6
tumor	19_22652436	19_23598409	0.0423809	3.4657	0.00104447	0.314047	CTB-175P5.4	no CpG island	no promoter	37	15	4
tumor	9_876418	9_970211	-0.123058	-3.46502	0.00104665	0.314047	no gene	known CpG island	no promoter	33	17	6
tumor	9_876418	9_973468	-0.129713	-3.46496	0.00104685	0.314047	no gene	no CpG island	no promoter	33	17	6
tumor	5_1288547	5_1378503	0.0960333	3.46229	0.00105534	0.315363	RP11-325I22.2	no CpG island	no promoter	2	17	37
tumor	11_225196	11_829647	0.343917	3.46134	0.00105841	0.315363	AP006621.8	known CpG island	no promoter	48	8	0
tumor	11_225196	11_829647	0.343917	3.46134	0.00105841	0.315363	EFCAB4A	known CpG island	no promoter	48	8	0
tumor	9_876418	9_505638	0.0798807	3.46116	0.00105896	0.315363	KANK1	known CpG island	no promoter	33	17	6
tumor	11_32459923	11_31827802	0.184995	3.46079	0.00106018	0.315363	PAX6	known CpG island	no promoter	32	24	0
tumor	9_684160	9_470636	-0.166663	-3.46007	0.00106247	0.315379	RP11-165F24.3	no CpG island	KANK1	28	17	11
tumor	9_684160	9_470636	-0.166663	-3.46007	0.00106247	0.315379	KANK1	no CpG island	KANK1	28	17	11
tumor	19_49267882	19_49122829	0.0109409	3.45887	0.00106635	0.315696	AC022154.7	known CpG island	SPHK2	48	5	3
tumor	19_49267882	19_49122829	0.0109409	3.45887	0.00106635	0.315696	SPHK2	known CpG island	SPHK2	48	5	3
tumor	6_152546094	6_151560735	-0.134949	-3.4577	0.00107017	0.315696	no gene	no CpG island	AKAP12	7	24	25
tumor	X_70022420	X_70417901	0.146014	3.45767	0.00107026	0.315696	RP5-1091N2.9	no CpG island	no promoter	7	27	22
tumor	22_40669648	22_39827687	-0.112222	-3.45554	0.00107718	0.317075	TAB1	no CpG island	no promoter	27	25	4
tumor	5_1283755	5_421518	-0.155712	-3.45279	0.00108621	0.317336	AHRR	known CpG island	no promoter	36	17	3
tumor	19_22652436	19_22018752	0.0493993	3.4524	0.0010875	0.317336	ZNF43	known CpG island	no promoter	37	15	4
tumor	5_1286516	5_1277474	-0.161105	-3.45219	0.00108817	0.317336	TERT	known CpG island	no promoter	7	29	20
tumor	11_225196	11_624574	0.220838	3.45195	0.00108898	0.317336	CDHR5	no CpG island	no promoter	48	8	0
tumor	5_1286516	5_1864529	-0.0710829	-3.45184	0.00108932	0.317336	no gene	no CpG island	no promoter	7	29	20
tumor	11_35085453	11_35072795	0.0657308	3.4494	0.00109742	0.318053	no gene	no CpG island	no promoter	19	21	16
tumor	1_22450487	1_22446566	-0.147837	-3.44897	0.00109884	0.318053	WNT4	known CpG island	no promoter	40	15	1
tumor	5_1283755	5_846974	-0.197767	-3.44891	0.00109903	0.318053	ZDHHC11	no CpG island	no promoter	36	17	3
tumor	5_1288547	5_399835	-0.126083	-3.44838	0.0011008	0.318053	AHRR	no CpG island	no promoter	2	17	37
tumor	3_128122820	3_128400128	0.0333645	3.44752	0.00110367	0.318228	no gene	known CpG island	no promoter	35	16	5
tumor	19_49267882	19_49226001	-0.050758	-3.44666	0.00110656	0.318412	RASIP1	no CpG island	no promoter	48	5	3
normal	5_1283755	5_1077731	-0.0482669	-3.89048	0.000458631	0.319235	SLC12A7	no CpG island	no promoter	18	14	3
normal	9_826585	9_1044980	0.178082	3.88966	0.000459693	0.319235	no gene	no CpG island	no promoter	3	17	15
normal	9_684160	9_974692	0.102795	3.88925	0.000460226	0.319235	no gene	no CpG island	no promoter	21	10	4
tumor	5_1283755	5_668515	-0.132362	-3.44459	0.0011135	0.319255	TPPP	known CpG island	AC026740.1	36	17	3
tumor	5_1283755	5_668515	-0.132362	-3.44459	0.0011135	0.319255	AC026740.1	known CpG island	AC026740.1	36	17	3
tumor	11_35085453	11_34112224	0.113284	3.44444	0.00111402	0.319255	CAPRIN1	no CpG island	no promoter	19	21	16
tumor	9_802228	9_970549	0.138915	3.44318	0.00111828	0.319827	no gene	known CpG island	no promoter	7	27	22
tumor	5_1288547	5_490533	0.094239	3.44075	0.00112655	0.32045	SLC9A3	no CpG island	no promoter	2	17	37
tumor	5_1288547	5_431196	-0.0286114	-3.43978	0.00112984	0.32045	AHRR	no CpG island	no promoter	2	17	37
tumor	5_1286516	5_1444746	-0.0623292	-3.43875	0.00113336	0.32045	SLC6A3	known CpG island	no promoter	7	29	20
tumor	9_876418	9_970186	-0.124194	-3.43873	0.00113344	0.32045	no gene	known CpG island	no promoter	33	17	6
tumor	19_22652436	19_21950195	0.02305	3.43822	0.0011352	0.32045	ZNF100	known CpG island	no promoter	37	15	4
tumor	1_22450487	1_21900146	-0.16017	-3.43791	0.00113625	0.32045	ALPL	no CpG island	no promoter	40	15	1
tumor	5_1283755	5_965585	-0.137118	-3.43774	0.00113684	0.32045	no gene	no CpG island	no promoter	36	17	3
tumor	10_105674854	10_105314045	0.0444451	3.43716	0.00113881	0.32045	NEURL	no CpG island	no promoter	8	10	38
tumor	5_1288547	5_1798989	-0.128646	-3.43655	0.00114092	0.32045	MRPL36	no CpG island	no promoter	2	17	37
tumor	9_815682	9_975901	0.13694	3.43561	0.00114419	0.32073	no gene	no CpG island	DMRT3	30	20	6
tumor	11_35085453	11_35966621	0.0948708	3.43354	0.00115137	0.321878	LDLRAD3	no CpG island	no promoter	19	21	16
tumor	5_1283755	5_1136755	-0.0374128	-3.43271	0.00115424	0.321878	no gene	no CpG island	no promoter	36	17	3
tumor	11_225196	11_194441	0.238561	3.43246	0.00115513	0.321878	BET1L	no CpG island	no promoter	48	8	0
tumor	11_225196	11_194441	0.238561	3.43246	0.00115513	0.321878	SCGB1C1	no CpG island	no promoter	48	8	0
normal	19_49267882	19_50194431	0.0388587	3.88432	0.00046667	0.3222	CPT1C	known CpG island	CPT1C	32	2	1
tumor	9_802228	9_972240	0.0728605	3.43101	0.00116019	0.322414	no gene	known CpG island	no promoter	7	27	22
tumor	19_49267882	19_48949258	0.0217734	3.4304	0.00116234	0.322414	GRWD1	known CpG island	GRWD1	48	5	3
tumor	9_802228	9_970321	0.143161	3.42845	0.00116921	0.322414	no gene	known CpG island	no promoter	7	27	22
tumor	11_32459923	11_32455529	-0.0322404	-3.42835	0.00116956	0.322414	WT1	known CpG island	WT1-AS	32	24	0
tumor	5_1288547	5_1320722	0.255184	3.42722	0.00117353	0.322414	CLPTM1L	no CpG island	no promoter	2	17	37
tumor	11_225196	11_1005557	-0.120626	-3.42675	0.00117522	0.322414	AP2A2	no CpG island	no promoter	48	8	0
tumor	11_225196	11_993608	-0.111939	-3.42619	0.0011772	0.322414	AP2A2	known CpG island	no promoter	48	8	0
tumor	1_22507684	1_22920113	0.246678	3.4258	0.00117858	0.322414	EPHA8	known CpG island	no promoter	32	24	0
tumor	11_35085453	11_34426786	0.0935229	3.42343	0.00118704	0.322414	no gene	no CpG island	no promoter	19	21	16
tumor	22_40669648	22_41346938	0.0145665	3.42336	0.00118732	0.322414	XPNPEP3	known CpG island	RBX1	27	25	4
tumor	11_225196	11_696286	0.0258681	3.42266	0.00118981	0.322414	DEAF1	known CpG island	TMEM80	48	8	0
tumor	11_225196	11_696286	0.0258681	3.42266	0.00118981	0.322414	EPS8L2	known CpG island	TMEM80	48	8	0
tumor	11_225196	11_696286	0.0258681	3.42266	0.00118981	0.322414	TMEM80	known CpG island	TMEM80	48	8	0
tumor	X_70022420	X_69510410	0.10221	3.42233	0.00119101	0.322414	KIF4A	no CpG island	KIF4A	7	27	22
tumor	2_67090367	2_66661982	0.0715795	3.42196	0.00119232	0.322414	MEIS1	no CpG island	no promoter	50	6	0
tumor	13_41179798	13_41636069	0.0291319	3.42101	0.00119576	0.322414	WBP4	known CpG island	WBP4	28	23	5
tumor	2_67090367	2_66808694	0.0713899	3.41987	0.00119985	0.322414	AC007392.3	known CpG island	no promoter	50	6	0
tumor	5_1283755	5_1479878	0.0841788	3.41961	0.00120081	0.322414	LPCAT1	no CpG island	no promoter	36	17	3
tumor	5_1288547	5_537459	0.129137	3.41898	0.00120309	0.322414	no gene	known CpG island	no promoter	2	17	37
tumor	4_70634441	4_71503608	-0.124851	-3.41876	0.00120391	0.322414	ENAM	no CpG island	no promoter	29	16	11
tumor	11_225196	11_943817	-0.0327531	-3.41866	0.00120424	0.322414	AP2A2	known CpG island	no promoter	48	8	0
tumor	11_32370380	11_32458012	0.0350176	3.41629	0.00121289	0.322414	WT1-AS	no CpG island	WT1-AS	48	8	0
tumor	10_105674854	10_104679434	-0.135372	-3.4162	0.0012132	0.322414	CNNM2	no CpG island	no promoter	8	10	38
tumor	6_152562271	6_151646674	0.0292146	3.41501	0.00121757	0.322414	AKAP12	known CpG island	no promoter	34	20	2
tumor	9_815682	9_974458	0.156158	3.41464	0.00121893	0.322414	no gene	no CpG island	no promoter	30	20	6
tumor	19_49267882	19_49298703	0.0126349	3.41399	0.00122134	0.322414	BCAT2	known CpG island	no promoter	48	5	3
tumor	9_802228	9_974269	0.159229	3.41386	0.00122179	0.322414	no gene	no CpG island	no promoter	7	27	22
tumor	11_35085453	11_35440133	0.118296	3.4111	0.00123202	0.322414	SLC1A2	no CpG island	RP4-683L5.1	19	21	16
tumor	9_815682	9_969594	0.189554	3.40966	0.00123737	0.322414	no gene	known CpG island	no promoter	30	20	6
tumor	6_152543949	6_152730955	-0.122709	-3.40938	0.00123839	0.322414	SYNE1	no CpG island	RNA5SP223	24	30	2
tumor	5_1286516	5_1840294	0.0679165	3.40896	0.00123998	0.322414	no gene	no CpG island	no promoter	7	29	20
tumor	1_22507684	1_23279604	-0.219853	-3.40826	0.00124258	0.322414	LACTBL1	known CpG island	no promoter	32	24	0
tumor	5_1283755	5_1105503	-0.0541589	-3.40792	0.00124386	0.322414	SLC12A7	no CpG island	no promoter	36	17	3
tumor	11_32368744	11_31885698	-0.156925	-3.40777	0.00124442	0.322414	RCN1	no CpG island	no promoter	16	34	6
tumor	9_876418	9_975600	-0.131665	-3.40693	0.00124758	0.322414	no gene	no CpG island	DMRT3	33	17	6
tumor	11_108354102	11_107540995	-0.110142	-3.40629	0.00124997	0.322414	no gene	no CpG island	no promoter	19	28	9
tumor	5_1283755	5_1876139	0.0300244	3.40578	0.0012519	0.322414	no gene	known CpG island	no promoter	36	17	3
tumor	1_22450487	1_23345380	0.112067	3.40569	0.00125221	0.322414	no gene	no CpG island	KDM1A	40	15	1
tumor	19_49267882	19_50189459	0.228296	3.40512	0.00125439	0.322414	PRMT1	no CpG island	no promoter	48	5	3
tumor	16_51481596	16_50708040	-0.0341582	-3.40506	0.00125461	0.322414	SNX20	known CpG island	no promoter	46	9	1
tumor	5_1288547	5_759530	-0.133795	-3.40482	0.0012555	0.322414	ZDHHC11	no CpG island	no promoter	2	17	37
tumor	5_1288547	5_759530	-0.133795	-3.40482	0.0012555	0.322414	ZDHHC11B	no CpG island	no promoter	2	17	37
tumor	5_1288547	5_885161	0.125328	3.40446	0.00125686	0.322414	BRD9	no CpG island	no promoter	2	17	37
tumor	9_684160	9_970781	0.188368	3.40402	0.00125854	0.322414	no gene	known CpG island	no promoter	28	17	11
tumor	11_225196	11_820415	0.0650736	3.40373	0.00125963	0.322414	PNPLA2	no CpG island	no promoter	48	8	0
tumor	9_684160	9_842627	0.0895014	3.40367	0.00125988	0.322414	DMRT1	known CpG island	DMRT1	28	17	11
tumor	9_876418	9_975841	-0.14559	-3.40357	0.00126024	0.322414	no gene	no CpG island	DMRT3	33	17	6
tumor	2_11721535	2_11605800	0.0125339	3.40331	0.00126121	0.322414	E2F6	known CpG island	no promoter	25	23	8
tumor	2_11721535	2_11605800	0.0125339	3.40331	0.00126121	0.322414	AC099344.1	known CpG island	no promoter	25	23	8
tumor	9_815682	9_972971	0.173136	3.40301	0.00126236	0.322414	no gene	known CpG island	no promoter	30	20	6
tumor	9_815682	9_972983	0.150421	3.40244	0.00126453	0.322414	no gene	known CpG island	no promoter	30	20	6
tumor	12_46831129	12_47225028	-0.0482066	-3.40171	0.00126731	0.322541	SLC38A4	known CpG island	no promoter	11	22	23
tumor	22_40669648	22_39690626	-0.142886	-3.39978	0.00127468	0.323396	RP3-333H23.8	no CpG island	no promoter	27	25	4
tumor	2_11721535	2_11757023	-0.213452	-3.39963	0.00127526	0.323396	GREB1	no CpG island	no promoter	25	23	8
tumor	9_815682	9_211762	-0.112532	-3.39902	0.0012776	0.323408	no gene	no CpG island	no promoter	30	20	6
tumor	9_815682	9_974548	0.161605	3.3981	0.00128114	0.323723	no gene	no CpG island	no promoter	30	20	6
tumor	19_49267882	19_50027885	-0.0332094	-3.39579	0.00129008	0.325397	FCGRT	known CpG island	no promoter	48	5	3
tumor	9_815682	9_970768	0.208936	3.39485	0.00129372	0.325734	no gene	known CpG island	no promoter	30	20	6
tumor	9_815682	9_974448	0.15908	3.39294	0.00130116	0.327023	no gene	no CpG island	no promoter	30	20	6
tumor	22_40669648	22_40419868	-0.0634258	-3.39151	0.00130677	0.327848	FAM83F	no CpG island	no promoter	27	25	4
tumor	9_802228	9_974793	0.160131	3.39005	0.0013125	0.328538	no gene	no CpG island	no promoter	7	27	22
tumor	5_1288547	5_2094211	-0.165068	-3.38962	0.00131418	0.328538	no gene	no CpG island	no promoter	2	17	37
tumor	9_815682	9_969596	0.191939	3.38881	0.00131741	0.328762	no gene	known CpG island	no promoter	30	20	6
normal	11_225196	11_829547	0.119921	3.87079	0.000484778	0.33058	AP006621.8	known CpG island	no promoter	30	5	0
normal	11_225196	11_829547	0.119921	3.87079	0.000484778	0.33058	EFCAB4A	known CpG island	no promoter	30	5	0
normal	6_152543949	6_151562195	0.0292545	3.86784	0.000488831	0.33058	AKAP12	known CpG island	no promoter	21	13	1
normal	11_107999907	11_107441053	-0.162521	-3.8677	0.000489019	0.33058	no gene	no CpG island	no promoter	31	4	0
normal	22_40669648	22_40440435	0.0191096	3.86635	0.000490878	0.33058	RP3-496C20.1	no CpG island	TNRC6B	17	15	3
normal	22_40669648	22_41593038	0.0218368	3.86572	0.000491752	0.33058	RP1-85F18.5	known CpG island	no promoter	17	15	3
normal	5_1288547	5_1386623	-0.0382298	-3.86479	0.000493036	0.33058	no gene	known CpG island	no promoter	2	13	20
normal	11_225196	11_975859	0.262277	3.86343	0.000494934	0.33058	AP2A2	no CpG island	no promoter	30	5	0
normal	19_49267882	19_49256192	0.12542	3.86092	0.000498429	0.33058	FUT1	known CpG island	no promoter	32	2	1
normal	5_1283755	5_1510544	0.085805	3.85935	0.000500644	0.33058	LPCAT1	no CpG island	no promoter	18	14	3
normal	12_46831129	12_46777773	-0.0215602	-3.85904	0.000501078	0.33058	RP11-96H19.1	known CpG island	RP11-96H19.1	5	14	16
normal	9_815682	9_1043137	0.125945	3.85561	0.00050593	0.331235	no gene	no CpG island	no promoter	19	12	4
normal	19_22652436	19_23432715	0.0239855	3.85369	0.000508669	0.331235	ZNF724P	no CpG island	no promoter	28	5	2
normal	16_51481596	16_50775878	0.0296875	3.85362	0.000508765	0.331235	RP11-327F22.1	known CpG island	CYLD	26	8	1
normal	16_51481596	16_50775878	0.0296875	3.85362	0.000508765	0.331235	RP11-327F22.1	known CpG island	hsa-mir-3181	26	8	1
tumor	1_22450487	1_22310283	-0.158778	-3.38436	0.00133511	0.332592	CELA3B	no CpG island	no promoter	40	15	1
tumor	9_802228	9_974820	0.1745	3.38234	0.0013432	0.333411	no gene	no CpG island	no promoter	7	27	22
tumor	11_225196	11_997008	-0.220377	-3.38186	0.00134516	0.333411	AP2A2	no CpG island	no promoter	48	8	0
tumor	9_826585	9_113229	-0.0371833	-3.38177	0.00134549	0.333411	RP11-143M1.4	known CpG island	no promoter	9	25	22
normal	11_107999907	11_107986382	0.198778	3.84671	0.000518744	0.33479	RP11-144G7.2	no CpG island	no promoter	31	4	0
normal	5_1288547	5_926589	-0.113667	-3.84427	0.000522314	0.33479	no gene	known CpG island	no promoter	2	13	20
normal	13_41179798	13_41706290	0.0881832	3.84397	0.000522749	0.33479	KBTBD6	known CpG island	no promoter	15	16	4
normal	5_1283755	5_1029611	-0.0636751	-3.84363	0.000523246	0.33479	NKD2	no CpG island	no promoter	18	14	3
tumor	9_815682	9_974468	0.160819	3.37965	0.0013541	0.334956	no gene	no CpG island	no promoter	30	20	6
tumor	1_22450487	1_22108284	0.0883127	3.37878	0.00135763	0.33524	USP48	no CpG island	no promoter	40	15	1
tumor	9_876418	9_971544	-0.167832	-3.37782	0.00136154	0.335348	no gene	known CpG island	no promoter	33	17	6
tumor	11_35085453	11_35442141	0.0962844	3.3775	0.00136283	0.335348	RP4-683L5.1	no CpG island	no promoter	19	21	16
tumor	5_176450837	5_176046162	-0.116571	-3.37651	0.00136688	0.33576	no gene	known CpG island	no promoter	4	40	12
tumor	5_1283755	5_771945	-0.103705	-3.37535	0.00137163	0.336341	ZDHHC11	no CpG island	no promoter	36	17	3
tumor	9_815682	9_970186	0.122894	3.37375	0.00137823	0.336777	no gene	known CpG island	no promoter	30	20	6
tumor	9_876418	9_505710	0.0378356	3.37232	0.00138414	0.336777	KANK1	known CpG island	no promoter	33	17	6
tumor	12_46798900	12_46005131	0.119162	3.37182	0.00138622	0.336777	no gene	no CpG island	no promoter	16	28	12
tumor	6_152546094	6_152640286	0.144551	3.37138	0.00138803	0.336777	SYNE1	no CpG island	no promoter	7	24	25
tumor	9_684160	9_969954	0.132419	3.37098	0.00138971	0.336777	no gene	known CpG island	no promoter	28	17	11
tumor	11_225196	11_537001	0.306525	3.37087	0.00139017	0.336777	HRAS	known CpG island	LRRC56	48	8	0
tumor	6_152684585	6_152506734	0.171565	3.36981	0.00139459	0.336777	SYNE1	no CpG island	no promoter	28	25	3
tumor	9_684160	9_761328	-0.121432	-3.36954	0.00139572	0.336777	no gene	no CpG island	no promoter	28	17	11
tumor	19_22652436	19_21860793	0.173969	3.36898	0.00139806	0.336777	RP11-420K14.2	known CpG island	no promoter	37	15	4
tumor	9_876418	9_761482	0.12456	3.36869	0.00139929	0.336777	no gene	no CpG island	no promoter	33	17	6
tumor	9_876418	9_463635	-0.0406867	-3.36819	0.00140137	0.336777	DOCK8	no CpG island	no promoter	33	17	6
tumor	9_876418	9_463635	-0.0406867	-3.36819	0.00140137	0.336777	RP11-165F24.3	no CpG island	no promoter	33	17	6
tumor	6_152562271	6_152623292	0.0151523	3.36802	0.00140207	0.336777	SYNE1	known CpG island	no promoter	34	20	2
tumor	5_1283755	5_1881951	0.0529723	3.36685	0.001407	0.336786	IRX4	known CpG island	no promoter	36	17	3
tumor	5_1288547	5_646139	0.040576	3.36636	0.00140906	0.336786	CEP72	known CpG island	no promoter	2	17	37
tumor	3_169514585	3_169779374	-0.2111	-3.36608	0.00141024	0.336786	GPR160	no CpG island	RP11-379K17.9	25	23	8
tumor	5_1286516	5_1081767	0.226754	3.36527	0.00141364	0.336786	SLC12A7	no CpG island	no promoter	7	29	20
tumor	5_1286516	5_1923584	-0.107865	-3.36451	0.00141689	0.336786	no gene	no CpG island	no promoter	7	29	20
tumor	12_46798900	12_47219515	-0.104968	-3.36423	0.00141805	0.336786	SLC38A4	no CpG island	no promoter	16	28	12
tumor	5_1288547	5_1857444	0.226815	3.36405	0.00141883	0.336786	no gene	known CpG island	no promoter	2	17	37
normal	5_1283755	5_1510459	0.0776909	3.83978	0.000528946	0.336984	LPCAT1	no CpG island	no promoter	18	14	3
tumor	9_815682	9_970433	0.148335	3.36237	0.00142597	0.337912	no gene	known CpG island	no promoter	30	20	6
tumor	19_49267882	19_49134220	0.124788	3.36117	0.00143109	0.338557	DBP	known CpG island	no promoter	48	5	3
tumor	12_46831129	12_46661496	-0.0391735	-3.36058	0.0014336	0.338581	SLC38A1	known CpG island	no promoter	11	22	23
tumor	X_131626317	X_132539686	-0.150528	-3.35692	0.00144938	0.341737	GPC4	no CpG island	no promoter	35	21	0
tumor	13_41179798	13_41706802	0.0106341	3.35553	0.00145541	0.342458	KBTBD6	known CpG island	no promoter	28	23	5
tumor	11_35085453	11_34097810	0.078046	3.35486	0.0014583	0.342458	CAPRIN1	no CpG island	no promoter	19	21	16
tumor	11_35085453	11_34937180	0.00705699	3.35454	0.00145973	0.342458	APIP	no CpG island	PDHX	19	21	16
tumor	5_1283755	5_1228656	0.154294	3.35168	0.00147224	0.343362	SLC6A18	no CpG island	no promoter	36	17	3
tumor	9_815682	9_970610	0.138937	3.35007	0.00147932	0.343362	no gene	known CpG island	no promoter	30	20	6
tumor	5_1286516	5_389558	-0.0302979	-3.35004	0.00147945	0.343362	AHRR	no CpG island	no promoter	7	29	20
tumor	5_176450837	5_177371587	-0.0640072	-3.34948	0.00148191	0.343362	RP11-423H2.1	known CpG island	no promoter	4	40	12
tumor	5_176450837	5_177371587	-0.0640072	-3.34948	0.00148191	0.343362	RP11-1252I4.2	known CpG island	no promoter	4	40	12
tumor	9_815682	9_970605	0.124438	3.34902	0.00148398	0.343362	no gene	known CpG island	no promoter	30	20	6
tumor	19_22652436	19_23253218	0.0624338	3.34814	0.00148785	0.343362	CTD-2291D10.3	no CpG island	no promoter	37	15	4
tumor	9_876418	9_470507	0.0537246	3.348	0.00148849	0.343362	RP11-165F24.3	no CpG island	KANK1	33	17	6
tumor	9_876418	9_470507	0.0537246	3.348	0.00148849	0.343362	KANK1	no CpG island	KANK1	33	17	6
tumor	X_70149078	X_70503393	-0.101857	-3.34729	0.00149165	0.343362	NONO	known CpG island	NONO	21	26	9
tumor	11_225196	11_820112	0.0902778	3.34704	0.00149273	0.343362	PNPLA2	known CpG island	no promoter	48	8	0
tumor	19_49267882	19_49149637	0.0128874	3.34675	0.00149401	0.343362	SEC1P	no CpG island	no promoter	48	5	3
tumor	2_11702661	2_11926484	-0.0182389	-3.34639	0.00149566	0.343362	LPIN1	no CpG island	no promoter	12	18	26
tumor	9_815682	9_975075	0.135697	3.34633	0.0014959	0.343362	no gene	no CpG island	DMRT3	30	20	6
tumor	9_876418	9_974793	-0.15534	-3.34624	0.00149633	0.343362	no gene	no CpG island	no promoter	33	17	6
tumor	5_1283755	5_477973	-0.0872655	-3.34593	0.00149768	0.343362	CTD-2228K2.7	no CpG island	no promoter	36	17	3
tumor	5_1283755	5_477973	-0.0872655	-3.34593	0.00149768	0.343362	SLC9A3	no CpG island	no promoter	36	17	3
tumor	1_22450487	1_22899408	-0.241364	-3.3449	0.00150228	0.343699	EPHA8	no CpG island	no promoter	40	15	1
tumor	12_46831129	12_46767948	0.0981576	3.34452	0.00150402	0.343699	no gene	no CpG island	no promoter	11	22	23
tumor	6_152543949	6_152958864	-0.0676062	-3.34327	0.00150961	0.344419	SYNE1	no CpG island	no promoter	24	30	2
tumor	5_1286516	5_423930	-0.0605305	-3.34244	0.00151334	0.344712	AHRR	no CpG island	no promoter	7	29	20
normal	11_32370380	11_31848596	0.147092	3.82961	0.000544256	0.345256	RCN1	known CpG island	no promoter	30	5	0
tumor	9_802228	9_990380	0.172369	3.34083	0.00152062	0.345812	DMRT3	no CpG island	no promoter	7	27	22
tumor	9_876418	9_505634	0.0485923	3.33868	0.00153038	0.347471	KANK1	known CpG island	no promoter	33	17	6
normal	5_1283755	5_1069521	-0.08656	-3.82422	0.000552554	0.348725	SLC12A7	no CpG island	no promoter	18	14	3
normal	5_1288547	5_1345751	-0.0232324	-3.82301	0.000554423	0.348725	no gene	no CpG island	no promoter	2	13	20
normal	13_41179798	13_40516463	-0.133942	-3.81907	0.000560593	0.349872	no gene	no CpG island	no promoter	15	16	4
normal	5_1286516	5_1244962	-0.0937743	-3.81883	0.000560961	0.349872	SLC6A18	no CpG island	no promoter	6	22	7
tumor	6_152546094	6_152625320	0.098827	3.33498	0.00154736	0.350245	SYNE1	no CpG island	no promoter	7	24	25
tumor	5_176450837	5_176047595	0.0552484	3.33433	0.00155033	0.350245	SNCB	known CpG island	no promoter	4	40	12
tumor	12_46798900	12_47220092	-0.134895	-3.33398	0.00155196	0.350245	SLC38A4	no CpG island	no promoter	16	28	12
tumor	11_108354102	11_109294154	0.0316727	3.33364	0.00155353	0.350245	RP11-708B6.2	known CpG island	no promoter	19	28	9
tumor	11_108354102	11_109294154	0.0316727	3.33364	0.00155353	0.350245	C11orf87	known CpG island	no promoter	19	28	9
tumor	5_1286516	5_1394475	0.138488	3.33332	0.00155502	0.350245	SLC6A3	no CpG island	no promoter	7	29	20
tumor	X_131626317	X_132091071	-0.153554	-3.33219	0.00156024	0.350861	HS6ST2	known CpG island	no promoter	35	21	0
tumor	3_128122820	3_127395182	-0.0389357	-3.33073	0.00156701	0.351425	ABTB1	no CpG island	no promoter	35	16	5
tumor	1_22450487	1_23012370	0.0781246	3.32994	0.00157074	0.351425	no gene	no CpG island	no promoter	40	15	1
tumor	9_876418	9_990380	-0.16855	-3.32965	0.00157209	0.351425	DMRT3	no CpG island	no promoter	33	17	6
tumor	5_1283755	5_1501601	-0.0627209	-3.32951	0.00157272	0.351425	LPCAT1	no CpG island	no promoter	36	17	3
normal	9_684160	9_974162	0.107305	3.81443	0.000567929	0.351464	no gene	no CpG island	no promoter	21	10	4
normal	5_1288547	5_1922058	0.0750001	3.81423	0.000568249	0.351464	no gene	no CpG island	no promoter	2	13	20
tumor	9_876418	9_1048776	-0.0811412	-3.32892	0.00157547	0.351482	no gene	no CpG island	DMRT2	33	17	6
tumor	11_32370380	11_33280100	0.0563424	3.32827	0.00157855	0.351612	HIPK3	known CpG island	no promoter	48	8	0
normal	12_46798900	12_46777962	-0.0149731	-3.81025	0.000574609	0.351619	RP11-96H19.1	no CpG island	RP11-96H19.1	9	20	6
normal	11_225196	11_825338	-0.153865	-3.80832	0.000577729	0.351619	PNPLA2	no CpG island	EFCAB4A	30	5	0
normal	11_225196	11_825338	-0.153865	-3.80832	0.000577729	0.351619	AP006621.8	no CpG island	EFCAB4A	30	5	0
normal	22_40669648	22_40743673	-0.0618115	-3.80819	0.000577933	0.351619	ADSL	no CpG island	no promoter	17	15	3
normal	X_131578034	X_131545748	-0.0598934	-3.80711	0.000579686	0.351619	RAP2C-AS1	no CpG island	no promoter	3	14	18
normal	X_131578034	X_131545748	-0.0598934	-3.80711	0.000579686	0.351619	MBNL3	no CpG island	no promoter	3	14	18
normal	11_108354102	11_108370988	0.122067	3.80671	0.000580342	0.351619	no gene	no CpG island	no promoter	10	20	5
tumor	19_49267882	19_49588236	0.0288274	3.32748	0.00158223	0.351877	no gene	no CpG island	SNRNP70	48	5	3
tumor	X_70149078	X_70128208	0.0148849	3.32643	0.00158719	0.351981	TEX11	no CpG island	no promoter	21	26	9
tumor	X_70093038	X_70823862	-0.0627799	-3.32621	0.00158821	0.351981	ACRC	known CpG island	no promoter	9	37	10
tumor	X_70093038	X_69644849	-0.0811569	-3.3258	0.00159019	0.351981	GDPD2	no CpG island	no promoter	9	37	10
tumor	11_108168995	11_107798258	-0.103367	-3.3252	0.001593	0.352051	SLC35F2	no CpG island	RAB39A	34	20	2
tumor	3_128122820	3_128712703	0.121193	3.32404	0.00159852	0.35263	KIAA1257	known CpG island	no promoter	35	16	5
tumor	1_22507684	1_22228153	-0.192593	-3.32334	0.00160182	0.35263	HSPG2	no CpG island	no promoter	32	24	0
tumor	19_49267882	19_50003917	0.165174	3.32283	0.00160426	0.35263	hsa-mir-150	no CpG island	hsa-mir-150	48	5	3
tumor	19_49267882	19_48994781	0.029337	3.32254	0.00160563	0.35263	LMTK3	no CpG island	no promoter	48	5	3
normal	5_176450837	5_177413611	0.080688	3.80366	0.000585321	0.353194	no gene	no CpG island	no promoter	2	22	11
tumor	19_49267882	19_50169003	0.0200336	3.32047	0.00161554	0.35326	IRF3	known CpG island	BCL2L12	48	5	3
tumor	19_49267882	19_50169003	0.0200336	3.32047	0.00161554	0.35326	BCL2L12	known CpG island	BCL2L12	48	5	3
tumor	11_32368744	11_33061814	-0.0138881	-3.32046	0.00161559	0.35326	TCP11L1	known CpG island	TCP11L1	16	34	6
tumor	5_1283755	5_1143486	-0.0433719	-3.32037	0.00161601	0.35326	no gene	no CpG island	no promoter	36	17	3
tumor	3_128122820	3_128968397	0.0247058	3.31925	0.00162139	0.353451	no gene	known CpG island	COPG1	35	16	5
tumor	9_876418	9_969578	-0.146429	-3.31693	0.00163263	0.353451	no gene	known CpG island	no promoter	33	17	6
tumor	3_128122820	3_128713482	0.116111	3.3167	0.00163372	0.353451	KIAA1257	no CpG island	no promoter	35	16	5
tumor	9_815682	9_707126	0.00930711	3.31663	0.00163408	0.353451	KANK1	known CpG island	no promoter	30	20	6
tumor	11_225196	11_373137	-0.233662	-3.31651	0.00163466	0.353451	B4GALNT4	no CpG island	no promoter	48	8	0
tumor	19_49267882	19_48306653	-0.108888	-3.31597	0.00163729	0.353451	TPRX1	known CpG island	no promoter	48	5	3
tumor	5_1286516	5_1282413	0.109481	3.31561	0.00163901	0.353451	TERT	no CpG island	no promoter	7	29	20
tumor	11_32459923	11_33400613	-0.0357515	-3.31545	0.00163978	0.353451	no gene	no CpG island	no promoter	32	24	0
tumor	16_51481596	16_51324674	-0.250462	-3.31483	0.00164283	0.353451	no gene	no CpG island	no promoter	46	9	1
tumor	X_131626317	X_130930165	-0.136853	-3.31465	0.00164367	0.353451	RP11-453F18__B.1	known CpG island	no promoter	35	21	0
tumor	X_131626317	X_130930165	-0.136853	-3.31465	0.00164367	0.353451	RP11-512H23.2	known CpG island	no promoter	35	21	0
tumor	11_32459923	11_31835453	0.0942538	3.31449	0.00164446	0.353451	PAX6	known CpG island	no promoter	32	24	0
tumor	11_32459923	11_31835453	0.0942538	3.31449	0.00164446	0.353451	RCN1	known CpG island	no promoter	32	24	0
tumor	9_876418	9_975543	-0.181409	-3.31352	0.00164921	0.353836	no gene	no CpG island	DMRT3	33	17	6
tumor	3_128122820	3_128690194	-0.0611735	-3.3131	0.00165127	0.353836	KIAA1257	no CpG island	no promoter	35	16	5
tumor	19_22652436	19_23015503	0.217963	3.31171	0.0016581	0.354205	ZNF723	no CpG island	ZNF723	37	15	4
tumor	1_22507684	1_21917570	0.156136	3.31112	0.00166099	0.354205	RP11-63N8.3	no CpG island	no promoter	32	24	0
tumor	9_815682	9_974643	0.130665	3.31097	0.00166172	0.354205	no gene	no CpG island	no promoter	30	20	6
tumor	12_46831129	12_46101495	0.134888	3.31044	0.00166435	0.354205	no gene	no CpG island	no promoter	11	22	23
tumor	1_22450487	1_22470407	-0.0948987	-3.3092	0.00167049	0.354205	WNT4	no CpG island	no promoter	40	15	1
tumor	5_1288547	5_843745	0.0496422	3.30812	0.00167582	0.354205	ZDHHC11	known CpG island	no promoter	2	17	37
tumor	5_1286516	5_851010	-0.119126	-3.30721	0.00168037	0.354205	ZDHHC11	no CpG island	no promoter	7	29	20
tumor	5_1286516	5_851010	-0.119126	-3.30721	0.00168037	0.354205	BRD9	no CpG island	no promoter	7	29	20
tumor	X_70093038	X_69672695	-0.129982	-3.30703	0.00168123	0.354205	DLG3	no CpG island	no promoter	9	37	10
tumor	3_128122820	3_128337100	0.0219668	3.30613	0.00168575	0.354205	no gene	known CpG island	no promoter	35	16	5
tumor	2_67090367	2_66660378	0.020202	3.30606	0.00168607	0.354205	MEIS1-AS3	no CpG island	MEIS1	50	6	0
tumor	11_35085453	11_35442165	0.122892	3.30604	0.00168619	0.354205	RP4-683L5.1	no CpG island	no promoter	19	21	16
tumor	9_684160	9_975325	0.150152	3.30601	0.00168635	0.354205	no gene	no CpG island	DMRT3	28	17	11
tumor	5_1283755	5_2205768	-0.0430129	-3.3056	0.00168839	0.354205	no gene	no CpG island	no promoter	36	17	3
tumor	5_176450837	5_176101928	0.0500643	3.30556	0.00168857	0.354205	no gene	no CpG island	no promoter	4	40	12
tumor	5_1288547	5_945642	-0.197634	-3.30514	0.00169067	0.354205	no gene	no CpG island	RP11-661C8.2	2	17	37
tumor	9_876418	9_972622	-0.139842	-3.30379	0.00169747	0.354924	no gene	known CpG island	no promoter	33	17	6
tumor	10_105674854	10_105344277	-0.160983	-3.30346	0.00169914	0.354924	NEURL	known CpG island	no promoter	8	10	38
tumor	1_22450487	1_21620995	-0.0875946	-3.30234	0.00170479	0.355173	ECE1	no CpG island	no promoter	40	15	1
tumor	1_22450487	1_21620995	-0.0875946	-3.30234	0.00170479	0.355173	RP5-1071N3.1	no CpG island	no promoter	40	15	1
tumor	6_152684585	6_153324852	-0.0364241	-3.30135	0.00170978	0.355173	no gene	no CpG island	no promoter	28	25	3
tumor	11_225196	11_925523	0.217291	3.30114	0.00171082	0.355173	AP2A2	known CpG island	AP2A2	48	8	0
tumor	11_35085453	11_35086237	-0.0893248	-3.3006	0.00171355	0.355173	no gene	no CpG island	no promoter	19	21	16
tumor	5_1283755	5_2132757	-0.141426	-3.30025	0.00171532	0.355173	no gene	no CpG island	no promoter	36	17	3
tumor	5_1286516	5_759495	-0.121368	-3.30014	0.00171591	0.355173	ZDHHC11	no CpG island	no promoter	7	29	20
tumor	5_1286516	5_759495	-0.121368	-3.30014	0.00171591	0.355173	ZDHHC11B	no CpG island	no promoter	7	29	20
tumor	5_1288547	5_1702448	0.0596483	3.29947	0.00171933	0.355173	no gene	known CpG island	no promoter	2	17	37
tumor	5_1288547	5_1344264	-0.129014	-3.29876	0.00172292	0.355173	CLPTM1L	no CpG island	no promoter	2	17	37
tumor	9_684160	9_975788	0.126641	3.29835	0.00172499	0.355173	no gene	no CpG island	DMRT3	28	17	11
tumor	11_32370380	11_32605484	0.0279275	3.2975	0.00172934	0.355173	EIF3M	known CpG island	EIF3M	48	8	0
tumor	19_22652436	19_22892063	0.157366	3.29708	0.00173149	0.355173	CTC-457E21.9	known CpG island	no promoter	37	15	4
tumor	19_22652436	19_22892063	0.157366	3.29708	0.00173149	0.355173	CTC-451A6.5	known CpG island	no promoter	37	15	4
tumor	11_35085453	11_35441900	0.039229	3.29627	0.00173567	0.355173	RP4-683L5.1	no CpG island	no promoter	19	21	16
tumor	11_108354102	11_107711653	0.143734	3.29626	0.00173571	0.355173	SLC35F2	no CpG island	no promoter	19	28	9
tumor	19_49267882	19_49107139	-0.0889341	-3.29623	0.00173588	0.355173	FAM83E	known CpG island	no promoter	48	5	3
tumor	X_70022420	X_70356420	0.14264	3.29579	0.00173812	0.355173	MED12	no CpG island	no promoter	7	27	22
normal	2_11721535	2_10984512	0.116996	3.79887	0.000593229	0.356516	no gene	no CpG island	no promoter	14	15	6
tumor	9_815682	9_975061	0.160767	3.29383	0.00174824	0.356724	no gene	no CpG island	DMRT3	30	20	6
tumor	12_46798900	12_47219710	-0.0960195	-3.29288	0.00175315	0.357209	SLC38A4	no CpG island	no promoter	16	28	12
normal	3_128122820	3_127633725	0.0869647	3.79563	0.000598624	0.357779	no gene	no CpG island	KBTBD12	20	10	5
normal	2_67090367	2_66665959	0.391208	3.79434	0.000600792	0.357779	MEIS1	no CpG island	no promoter	31	4	0
normal	X_70022420	X_70150676	-0.105172	-3.78849	0.000610708	0.357779	SLC7A3	known CpG island	no promoter	5	15	15
normal	3_128122820	3_127295084	-0.164815	-3.78796	0.000611616	0.357779	TPRA1	no CpG island	no promoter	20	10	5
normal	11_32370380	11_33037883	0.0704074	3.78718	0.000612945	0.357779	DEPDC7	known CpG island	DEPDC7	30	5	0
normal	6_152593102	6_152567585	-0.0901061	-3.787	0.000613248	0.357779	SYNE1	no CpG island	no promoter	15	16	4
normal	9_876418	9_971792	-0.0853223	-3.78664	0.00061387	0.357779	no gene	known CpG island	no promoter	19	12	4
normal	X_131171122	X_130217430	-0.0756944	-3.78621	0.000614613	0.357779	ARHGAP36	no CpG island	no promoter	18	14	3
tumor	5_1288547	5_442659	-0.143231	-3.29072	0.00176434	0.358972	C5orf55	no CpG island	EXOC3	2	17	37
tumor	9_802228	9_975079	0.154911	3.28935	0.00177155	0.359154	no gene	no CpG island	DMRT3	7	27	22
tumor	11_32368744	11_32159104	0.0892511	3.2892	0.00177233	0.359154	RP1-65P5.1	no CpG island	no promoter	16	34	6
tumor	11_32368744	11_32159104	0.0892511	3.2892	0.00177233	0.359154	RP1-65P5.5	no CpG island	no promoter	16	34	6
tumor	9_876418	9_975090	-0.142127	-3.28851	0.00177595	0.359154	no gene	no CpG island	DMRT3	33	17	6
tumor	5_1288547	5_442702	-0.0727302	-3.28843	0.00177637	0.359154	C5orf55	no CpG island	EXOC3	2	17	37
tumor	6_152546094	6_151662882	0.0329812	3.28812	0.00177798	0.359154	AKAP12	known CpG island	no promoter	7	24	25
tumor	2_67090367	2_66804613	0.0320713	3.28757	0.00178086	0.359221	AC007392.3	known CpG island	no promoter	50	6	0
normal	19_49267882	19_50003903	0.278034	3.78333	0.000619589	0.359267	hsa-mir-150	no CpG island	hsa-mir-150	32	2	1
normal	11_225196	11_561426	0.0798574	3.77731	0.000630091	0.360818	RASSF7	no CpG island	no promoter	30	5	0
normal	11_225196	11_702188	-0.149054	-3.77681	0.000630981	0.360818	DEAF1	no CpG island	no promoter	30	5	0
normal	11_225196	11_702188	-0.149054	-3.77681	0.000630981	0.360818	EPS8L2	no CpG island	no promoter	30	5	0
normal	11_225196	11_702188	-0.149054	-3.77681	0.000630981	0.360818	TMEM80	no CpG island	no promoter	30	5	0
normal	11_225196	11_534226	-0.221798	-3.77662	0.00063131	0.360818	HRAS	no CpG island	no promoter	30	5	0
normal	5_1283755	5_1325588	0.0706075	3.77522	0.00063378	0.360818	CLPTM1L	no CpG island	no promoter	18	14	3
normal	11_108354102	11_108365179	-0.0719093	-3.77402	0.000635923	0.360818	KDELC2	no CpG island	no promoter	10	20	5
normal	5_1283755	5_887858	0.0356382	3.77312	0.000637515	0.360818	BRD9	no CpG island	no promoter	18	14	3
normal	9_684160	9_974063	0.0769806	3.77213	0.000639279	0.360818	no gene	no CpG island	no promoter	21	10	4
tumor	3_128122820	3_128337083	0.0222247	3.28472	0.00179594	0.361367	no gene	known CpG island	no promoter	35	16	5
tumor	16_51481596	16_51185104	0.0504673	3.28434	0.00179792	0.361367	SALL1	known CpG island	no promoter	46	9	1
tumor	9_802228	9_972249	0.0536617	3.2841	0.00179918	0.361367	no gene	known CpG island	no promoter	7	27	22
tumor	11_32370380	11_32008895	0.124231	3.28266	0.00180688	0.362395	RCN1	known CpG island	no promoter	48	8	0
tumor	12_46798900	12_47219731	-0.108062	-3.28139	0.00181363	0.363233	SLC38A4	no CpG island	no promoter	16	28	12
tumor	5_1283755	5_1645711	0.0489532	3.28025	0.00181977	0.363546	no gene	known CpG island	no promoter	36	17	3
tumor	9_802228	9_970150	0.134836	3.27904	0.00182629	0.363546	no gene	known CpG island	no promoter	7	27	22
tumor	5_176450837	5_176069059	0.151251	3.27838	0.00182983	0.363546	EIF4E1B	no CpG island	no promoter	4	40	12
tumor	X_70149078	X_69269901	0.116154	3.27799	0.00183194	0.363546	no gene	no CpG island	no promoter	21	26	9
tumor	9_684160	9_971544	0.14344	3.27782	0.00183287	0.363546	no gene	known CpG island	no promoter	28	17	11
tumor	9_684160	9_975799	0.091026	3.27779	0.00183301	0.363546	no gene	no CpG island	DMRT3	28	17	11
tumor	6_152684585	6_152125861	-0.125906	-3.27736	0.00183535	0.363546	ESR1	no CpG island	no promoter	28	25	3
tumor	X_70022420	X_70356559	0.143496	3.27727	0.00183582	0.363546	MED12	no CpG island	no promoter	7	27	22
normal	11_108354102	11_107462894	-0.060289	-3.7664	0.000649594	0.363649	ELMOD1	no CpG island	AP000889.3	10	20	5
normal	11_108354102	11_107462894	-0.060289	-3.7664	0.000649594	0.363649	AP000889.3	no CpG island	AP000889.3	10	20	5
normal	9_684160	9_975600	0.112475	3.76373	0.000654464	0.363649	no gene	no CpG island	DMRT3	21	10	4
normal	19_22652436	19_22817470	0.0183496	3.76308	0.000655643	0.363649	ZNF492	known CpG island	ZNF492	28	5	2
normal	19_49267882	19_49956645	0.0399485	3.76266	0.000656419	0.363649	PIH1D1	known CpG island	ALDH16A1	32	2	1
normal	19_49267882	19_49956645	0.0399485	3.76266	0.000656419	0.363649	ALDH16A1	known CpG island	ALDH16A1	32	2	1
normal	19_49267882	19_49652480	0.0283404	3.76224	0.000657176	0.363649	PPFIA3	known CpG island	no promoter	32	2	1
normal	11_108168995	11_107986343	0.0554007	3.76125	0.000658994	0.363649	RP11-144G7.2	no CpG island	no promoter	19	14	2
tumor	10_105674854	10_106093694	0.160324	3.27538	0.00184606	0.36453	ITPRIP	no CpG island	no promoter	8	10	38
tumor	19_49267882	19_48823991	-0.194162	-3.27538	0.00184607	0.36453	CCDC114	no CpG island	EMP3	48	5	3
tumor	9_876418	9_505386	0.0234536	3.27493	0.00184854	0.36453	KANK1	known CpG island	no promoter	33	17	6
tumor	11_35085453	11_36019484	-0.0164636	-3.27304	0.00185887	0.365956	LDLRAD3	no CpG island	no promoter	19	21	16
tumor	5_1286516	5_946316	-0.0360849	-3.27266	0.00186096	0.365956	no gene	no CpG island	RP11-661C8.2	7	29	20
tumor	5_1286516	5_1887536	-0.0406601	-3.27203	0.00186438	0.366117	CTD-2194D22.4	known CpG island	CTD-2194D22.4	7	29	20
tumor	X_131626317	X_131265375	-0.194348	-3.27057	0.00187242	0.366605	RP1-305B16.3	no CpG island	no promoter	35	21	0
tumor	5_1283755	5_496323	-0.176375	-3.27046	0.00187304	0.366605	SLC9A3	no CpG island	no promoter	36	17	3
tumor	11_32459923	11_32452455	-0.0779073	-3.27001	0.00187554	0.366605	WT1	known CpG island	no promoter	32	24	0
tumor	5_1288547	5_1245659	-0.180915	-3.26969	0.00187727	0.366605	SLC6A18	no CpG island	no promoter	2	17	37
tumor	12_46798900	12_46005117	0.123863	3.26801	0.00188662	0.367922	no gene	no CpG island	no promoter	16	28	12
tumor	5_1283755	5_428044	-0.0812431	-3.26729	0.00189062	0.368008	AHRR	no CpG island	no promoter	36	17	3
tumor	2_11702661	2_11682017	-0.0502377	-3.26655	0.00189475	0.368008	GREB1	no CpG island	no promoter	12	18	26
tumor	19_49267882	19_49937069	-0.154737	-3.26652	0.00189489	0.368008	SLC17A7	known CpG island	no promoter	48	5	3
tumor	22_40669648	22_39928881	-0.0133878	-3.26567	0.00189961	0.368283	no gene	known CpG island	no promoter	27	25	4
tumor	12_46831129	12_46662110	-0.0163813	-3.26533	0.00190153	0.368283	SLC38A1	known CpG island	no promoter	11	22	23
tumor	9_802228	9_969785	0.148297	3.26486	0.00190419	0.368293	no gene	known CpG island	no promoter	7	27	22
tumor	12_46798900	12_47219747	-0.0911744	-3.26432	0.00190721	0.368371	SLC38A4	no CpG island	no promoter	16	28	12
tumor	1_22450487	1_21976914	-0.153093	-3.26371	0.00191062	0.368525	RAP1GAP	no CpG island	no promoter	40	15	1
normal	5_176450837	5_176738538	-0.0403035	-3.754	0.000672473	0.368534	MXD3	known CpG island	no promoter	2	22	11
normal	11_107999907	11_108094268	0.0666894	3.75382	0.000672812	0.368534	ATM	no CpG island	no promoter	31	4	0
tumor	9_815682	9_970654	0.140251	3.26251	0.0019174	0.369328	no gene	known CpG island	no promoter	30	20	6
normal	19_22652436	19_22778957	0.117379	3.75103	0.000678064	0.370046	CTC-457E21.10	no CpG island	CTC-457E21.3	28	5	2
tumor	5_1286516	5_423884	-0.047973	-3.26128	0.00192436	0.370161	AHRR	no CpG island	no promoter	7	29	20
normal	5_1288547	5_783296	-0.0146691	-3.74871	0.000682473	0.371088	ZDHHC11	no CpG island	no promoter	2	13	20
normal	19_49267882	19_49990789	0.030452	3.74681	0.000686097	0.371136	CTD-3148I10.15	known CpG island	RPL13A	32	2	1
normal	19_22652436	19_23598782	0.0205599	3.74386	0.00069176	0.371136	CTB-175P5.4	no CpG island	no promoter	28	5	2
normal	11_225196	11_350873	-0.142428	-3.74303	0.000693357	0.371136	no gene	no CpG island	no promoter	30	5	0
normal	11_225196	11_533535	-0.0408073	-3.74137	0.000696577	0.371136	HRAS	no CpG island	no promoter	30	5	0
normal	11_225196	11_237063	0.0300926	3.74039	0.000698472	0.371136	PSMD13	known CpG island	PSMD13	30	5	0
normal	11_35085453	11_34285372	0.133773	3.7392	0.000700801	0.371136	ABTB2	no CpG island	no promoter	8	18	9
normal	11_108168995	11_108680081	-0.0172323	-3.73917	0.000700861	0.371136	DDX10	no CpG island	no promoter	19	14	2
normal	5_1283755	5_962287	-0.0376946	-3.7383	0.000702564	0.371136	no gene	no CpG island	no promoter	18	14	3
tumor	5_1286516	5_510387	-0.101734	-3.25979	0.00193278	0.371276	SLC9A3	no CpG island	no promoter	7	29	20
tumor	5_1283755	5_1475210	0.150736	3.25916	0.00193635	0.371456	LPCAT1	no CpG island	no promoter	36	17	3
normal	5_1288547	5_1029750	0.0568829	3.7355	0.000708066	0.372716	NKD2	no CpG island	no promoter	2	13	20
tumor	22_40669648	22_39954421	0.0581609	3.25652	0.00195146	0.372822	no gene	known CpG island	no promoter	27	25	4
tumor	6_152684585	6_153429875	-0.0219925	-3.25644	0.00195187	0.372822	RGS17	no CpG island	no promoter	28	25	3
tumor	11_35085453	11_35440136	0.104971	3.25378	0.0019672	0.372822	SLC1A2	no CpG island	RP4-683L5.1	19	21	16
tumor	11_108354102	11_108370607	0.10245	3.25367	0.00196786	0.372822	no gene	no CpG island	no promoter	19	28	9
tumor	5_1288547	5_488442	0.119371	3.25293	0.00197212	0.372822	SLC9A3	known CpG island	no promoter	2	17	37
tumor	X_131171122	X_131350497	0.0755266	3.25276	0.00197311	0.372822	RAP2C	no CpG island	RAP2C-AS1	36	15	5
tumor	9_826585	9_970138	0.135592	3.2519	0.00197808	0.372822	no gene	known CpG island	no promoter	9	25	22
tumor	22_40669648	22_39827917	-0.0766364	-3.25181	0.00197863	0.372822	TAB1	no CpG island	no promoter	27	25	4
tumor	5_1283755	5_1866174	-0.163873	-3.25164	0.00197963	0.372822	no gene	no CpG island	no promoter	36	17	3
tumor	11_32459923	11_32913191	-0.0976892	-3.25161	0.00197979	0.372822	no gene	no CpG island	QSER1	32	24	0
tumor	5_1283755	5_1085786	-0.150875	-3.25154	0.00198019	0.372822	SLC12A7	known CpG island	no promoter	36	17	3
tumor	5_1288547	5_1346092	-0.148534	-3.25131	0.00198152	0.372822	no gene	no CpG island	no promoter	2	17	37
tumor	9_876418	9_470109	0.0160664	3.25082	0.00198436	0.372822	RP11-165F24.3	known CpG island	KANK1	33	17	6
tumor	11_35085453	11_34173941	0.0815691	3.25058	0.00198577	0.372822	ABTB2	no CpG island	no promoter	19	21	16
tumor	5_176450837	5_176868838	-0.0927751	-3.25016	0.00198821	0.372822	GRK6	no CpG island	no promoter	4	40	12
tumor	5_176450837	5_176868838	-0.0927751	-3.25016	0.00198821	0.372822	PRR7-AS1	no CpG island	no promoter	4	40	12
tumor	6_152543949	6_153019124	0.122763	3.24978	0.00199048	0.372822	MYCT1	no CpG island	MYCT1	24	30	2
tumor	3_169514585	3_169998141	-0.0751698	-3.24973	0.00199077	0.372822	PRKCI	no CpG island	no promoter	25	23	8
tumor	22_40669648	22_41253101	0.0185712	3.24967	0.00199107	0.372822	XPNPEP3	known CpG island	XPNPEP3	27	25	4
tumor	11_35085453	11_34492166	0.0505246	3.2484	0.0019985	0.373419	CAT	no CpG island	no promoter	19	21	16
tumor	5_1288547	5_1827586	0.1069	3.24775	0.00200237	0.373419	no gene	no CpG island	no promoter	2	17	37
tumor	6_152562271	6_152125861	-0.132227	-3.24745	0.00200411	0.373419	ESR1	no CpG island	no promoter	34	20	2
tumor	9_815682	9_975081	0.138094	3.24693	0.00200716	0.373419	no gene	no CpG island	DMRT3	30	20	6
tumor	19_49267882	19_49955161	0.013573	3.24687	0.0020075	0.373419	PIH1D1	known CpG island	ALDH16A1	48	5	3
tumor	9_802228	9_971046	0.114291	3.24582	0.00201369	0.373693	no gene	known CpG island	no promoter	7	27	22
tumor	22_40669648	22_39777728	-0.0282663	-3.24548	0.00201574	0.373693	SYNGR1	known CpG island	no promoter	27	25	4
tumor	9_684160	9_973559	0.136934	3.24528	0.00201692	0.373693	no gene	no CpG island	no promoter	28	17	11
tumor	5_1288547	5_1779416	0.140181	3.24427	0.00202291	0.373976	no gene	no CpG island	no promoter	2	17	37
tumor	6_152684585	6_151772946	0.0159609	3.24388	0.00202519	0.373976	RMND1	no CpG island	C6orf211	28	25	3
tumor	9_876418	9_505669	0.0635867	3.24365	0.00202659	0.373976	KANK1	known CpG island	no promoter	33	17	6
tumor	19_49267882	19_49653046	0.0255161	3.24289	0.00203106	0.373976	PPFIA3	known CpG island	no promoter	48	5	3
tumor	11_225196	11_1010349	-0.0920911	-3.24201	0.00203636	0.373976	AP2A2	no CpG island	no promoter	48	8	0
tumor	10_105674854	10_105344230	-0.131524	-3.24181	0.00203755	0.373976	NEURL	known CpG island	no promoter	8	10	38
tumor	11_225196	11_975703	0.176153	3.2415	0.0020394	0.373976	AP2A2	known CpG island	no promoter	48	8	0
tumor	16_51481596	16_51187432	0.0336779	3.24145	0.00203967	0.373976	no gene	known CpG island	no promoter	46	9	1
tumor	5_1283755	5_1262429	0.143224	3.24096	0.00204262	0.374031	TERT	no CpG island	no promoter	36	17	3
tumor	22_40669648	22_40084749	0.0633276	3.23986	0.00204918	0.374661	CACNA1I	no CpG island	no promoter	27	25	4
tumor	1_22450487	1_22210903	0.118444	3.2395	0.00205138	0.374661	HSPG2	no CpG island	no promoter	40	15	1
tumor	12_46831129	12_46660800	-0.0642639	-3.23855	0.00205711	0.375194	SLC38A1	no CpG island	no promoter	11	22	23
tumor	5_1286516	5_1884331	-0.0224928	-3.23779	0.00206165	0.375194	IRX4	known CpG island	CTD-2194D22.3	7	29	20
tumor	5_1286516	5_1884331	-0.0224928	-3.23779	0.00206165	0.375194	CTD-2194D22.3	known CpG island	CTD-2194D22.3	7	29	20
tumor	5_1288547	5_1340251	0.21597	3.23764	0.00206256	0.375194	CLPTM1L	no CpG island	no promoter	2	17	37
tumor	6_152546094	6_153323355	-0.0147091	-3.23725	0.00206494	0.375194	MTRF1L	no CpG island	no promoter	7	24	25
tumor	6_152684585	6_152623306	0.0185347	3.23636	0.0020703	0.375684	SYNE1	known CpG island	no promoter	28	25	3
tumor	9_684160	9_975543	0.155845	3.23586	0.00207336	0.375756	no gene	no CpG island	DMRT3	28	17	11
tumor	9_802228	9_974731	0.155603	3.23461	0.00208098	0.376651	no gene	no CpG island	no promoter	7	27	22
tumor	9_815682	9_973053	0.136618	3.23413	0.0020839	0.376698	no gene	known CpG island	no promoter	30	20	6
tumor	12_46798900	12_46661484	-0.0167618	-3.23304	0.00209055	0.377416	SLC38A1	known CpG island	no promoter	16	28	12
tumor	19_49267882	19_49001678	0.148343	3.2326	0.00209326	0.377422	LMTK3	no CpG island	no promoter	48	5	3
tumor	5_1288547	5_570168	-0.191729	-3.23036	0.00210703	0.379218	no gene	no CpG island	no promoter	2	17	37
tumor	9_826585	9_969826	0.133117	3.2301	0.00210861	0.379218	no gene	known CpG island	no promoter	9	25	22
tumor	6_152562271	6_151562896	-0.168065	-3.2295	0.00211231	0.379319	AKAP12	no CpG island	no promoter	34	20	2
tumor	11_35085453	11_35440138	0.111973	3.22914	0.00211455	0.379319	SLC1A2	no CpG island	RP4-683L5.1	19	21	16
tumor	6_152684585	6_151777612	-0.112763	-3.2285	0.00211849	0.379543	C6orf211	no CpG island	no promoter	28	25	3
tumor	11_225196	11_1156039	0.234643	3.22668	0.00212982	0.380206	MUC5AC	no CpG island	no promoter	48	8	0
tumor	5_1288547	5_344154	-0.0305076	-3.22639	0.00213159	0.380206	PDCD6	known CpG island	no promoter	2	17	37
tumor	5_1288547	5_344154	-0.0305076	-3.22639	0.00213159	0.380206	AHRR	known CpG island	no promoter	2	17	37
tumor	9_815682	9_969668	0.11032	3.22617	0.00213296	0.380206	no gene	known CpG island	no promoter	30	20	6
tumor	19_49267882	19_49521468	0.0562728	3.22617	0.00213297	0.380206	no gene	known CpG island	no promoter	48	5	3
tumor	X_131578034	X_131623214	-0.100271	-3.22456	0.00214303	0.380795	MBNL3	known CpG island	no promoter	5	21	30
tumor	5_1288547	5_1174608	-0.0236407	-3.22424	0.00214503	0.380795	CTD-3080P12.3	no CpG island	no promoter	2	17	37
tumor	X_131312089	X_131352726	-0.10767	-3.22404	0.00214629	0.380795	RAP2C	no CpG island	no promoter	21	32	3
tumor	X_131312089	X_131352726	-0.10767	-3.22404	0.00214629	0.380795	RAP2C-AS1	no CpG island	no promoter	21	32	3
tumor	9_876418	9_970202	-0.112506	-3.22392	0.00214708	0.380795	no gene	known CpG island	no promoter	33	17	6
normal	9_684160	9_974269	0.110057	3.72483	0.000729416	0.381426	no gene	no CpG island	no promoter	21	10	4
normal	19_49267882	19_50031028	0.0444772	3.72451	0.000730059	0.381426	RCN3	known CpG island	RCN3	32	2	1
normal	22_40669648	22_40803112	-0.284577	-3.7234	0.000732322	0.381426	SGSM3	no CpG island	no promoter	17	15	3
normal	2_11721535	2_10953055	0.0264825	3.72057	0.000738104	0.38182	PDIA6	known CpG island	no promoter	14	15	6
normal	11_32370380	11_32456273	0.0340909	3.7196	0.000740105	0.38182	WT1	known CpG island	WT1-AS	30	5	0
normal	X_70022420	X_70797867	0.102994	3.71926	0.000740794	0.38182	no gene	no CpG island	ACRC	5	15	15
tumor	3_128122820	3_128337044	0.0152327	3.22172	0.00216088	0.382063	no gene	known CpG island	no promoter	35	16	5
tumor	5_1288547	5_1809653	0.0179528	3.22154	0.00216202	0.382063	NDUFS6	no CpG island	no promoter	2	17	37
tumor	16_51481596	16_50745211	-0.0414631	-3.22149	0.00216236	0.382063	NOD2	no CpG island	RP11-327F22.6	46	9	1
tumor	5_1288547	5_536658	0.202171	3.22097	0.00216566	0.382168	no gene	no CpG island	no promoter	2	17	37
tumor	19_49267882	19_48794368	0.0315218	3.22042	0.00216913	0.382301	no gene	known CpG island	no promoter	48	5	3
tumor	X_70149078	X_69397117	0.11781	3.21986	0.00217268	0.382392	no gene	no CpG island	DGAT2L6	21	26	9
tumor	9_876418	9_969544	-0.137552	-3.2194	0.00217558	0.382392	no gene	known CpG island	no promoter	33	17	6
tumor	19_22652436	19_23598880	0.0723608	3.21885	0.00217907	0.382392	no gene	no CpG island	no promoter	37	15	4
tumor	11_35085453	11_35440122	0.0972233	3.21863	0.0021805	0.382392	SLC1A2	no CpG island	RP4-683L5.1	19	21	16
tumor	19_49267882	19_49127475	0.0601818	3.21789	0.00218521	0.382742	SPHK2	known CpG island	no promoter	48	5	3
normal	3_128122820	3_127313759	-0.0602509	-3.71583	0.000747892	0.383709	TPRA1	no CpG island	no promoter	20	10	5
normal	6_152546094	6_152506734	-0.203011	-3.7096	0.00076097	0.383709	SYNE1	no CpG island	no promoter	7	13	15
normal	2_11702661	2_11627409	-0.245142	-3.70366	0.000773634	0.383709	no gene	no CpG island	no promoter	6	11	18
normal	11_225196	11_450371	0.131905	3.70278	0.000775519	0.383709	PTDSS2	known CpG island	no promoter	30	5	0
normal	19_49267882	19_50266993	-0.0475532	-3.70058	0.000780274	0.383709	no gene	no CpG island	no promoter	32	2	1
normal	22_40669648	22_39784436	0.0238534	3.69522	0.000791982	0.383709	no gene	known CpG island	no promoter	17	15	3
normal	19_22652436	19_22233933	-0.0181224	-3.69476	0.000792994	0.383709	no gene	no CpG island	ZNF257	28	5	2
normal	19_22652436	19_21950433	0.0116501	3.69476	0.000792994	0.383709	no gene	no CpG island	no promoter	28	5	2
normal	19_22652436	19_22018952	0.0090612	3.69476	0.000792994	0.383709	ZNF43	no CpG island	no promoter	28	5	2
normal	19_22652436	19_22018958	0.00509693	3.69476	0.000792994	0.383709	ZNF43	no CpG island	no promoter	28	5	2
normal	19_22652436	19_22019123	0.0203877	3.69476	0.000792994	0.383709	ZNF43	no CpG island	no promoter	28	5	2
normal	19_22652436	19_22817286	0.0543672	3.69476	0.000792994	0.383709	ZNF492	known CpG island	ZNF492	28	5	2
normal	19_22652436	19_23598463	0.0163102	3.69476	0.000792994	0.383709	CTB-175P5.4	no CpG island	no promoter	28	5	2
normal	19_22652436	19_23432871	0.0466005	3.69476	0.000792994	0.383709	ZNF724P	no CpG island	no promoter	28	5	2
normal	19_22652436	19_23577955	0.0233002	3.69476	0.000792994	0.383709	ZNF91	no CpG island	no promoter	28	5	2
normal	19_22652436	19_22018790	0.0815508	3.69476	0.000792994	0.383709	ZNF43	known CpG island	no promoter	28	5	2
normal	19_22652436	19_22034613	0.0163102	3.69476	0.000792994	0.383709	ZNF43	known CpG island	no promoter	28	5	2
normal	19_22652436	19_23577962	0.0407754	3.69476	0.000792994	0.383709	ZNF91	no CpG island	no promoter	28	5	2
normal	9_684160	9_970716	0.12422	3.6945	0.000793572	0.383709	no gene	known CpG island	no promoter	21	10	4
normal	2_11721535	2_11772283	-0.10325	-3.69327	0.000796273	0.383765	GREB1	no CpG island	no promoter	14	15	6
tumor	5_1286516	5_456585	-0.151002	-3.21654	0.00219384	0.383778	EXOC3	no CpG island	no promoter	7	29	20
tumor	11_35085453	11_35442075	0.0826962	3.21528	0.00220189	0.383965	RP4-683L5.1	no CpG island	no promoter	19	21	16
tumor	11_35085453	11_34265353	0.0670819	3.21524	0.00220215	0.383965	ABTB2	no CpG island	no promoter	19	21	16
tumor	1_22450487	1_21640717	0.254833	3.21501	0.00220365	0.383965	ECE1	no CpG island	no promoter	40	15	1
tumor	19_49267882	19_48614773	-0.165679	-3.21468	0.0022058	0.383965	no gene	no CpG island	no promoter	48	5	3
normal	9_684160	9_972827	0.116606	3.69109	0.000801107	0.38445	no gene	known CpG island	no promoter	21	10	4
normal	10_105674854	10_105156313	-0.0206433	-3.69018	0.000803131	0.38445	no gene	known CpG island	PDCD11	2	8	25
normal	5_1283755	5_1526929	-0.0515904	-3.68882	0.000806168	0.38445	no gene	no CpG island	no promoter	18	14	3
normal	1_22450487	1_22471748	0.0883547	3.68798	0.000808053	0.38445	no gene	no CpG island	no promoter	23	12	0
tumor	11_225196	11_288021	-0.44457	-3.21347	0.0022136	0.384493	RP11-326C3.2	no CpG island	RP11-326C3.2	48	8	0
tumor	11_225196	11_288021	-0.44457	-3.21347	0.0022136	0.384493	RP11-326C3.2	no CpG island	ATHL1	48	8	0
tumor	11_32370380	11_33280070	0.0450397	3.21336	0.00221429	0.384493	HIPK3	known CpG island	no promoter	48	8	0
normal	X_131578034	X_130937409	-0.177728	-3.68634	0.000811736	0.384968	RP11-453F18__B.1	no CpG island	no promoter	3	14	18
normal	X_131578034	X_130937409	-0.177728	-3.68634	0.000811736	0.384968	RP1-197O17.2	no CpG island	no promoter	3	14	18
tumor	11_225196	11_1047755	0.323204	3.21224	0.00222154	0.385277	no gene	no CpG island	no promoter	48	8	0
tumor	11_225196	11_403790	0.0702607	3.21105	0.00222926	0.386011	PKP3	no CpG island	no promoter	48	8	0
tumor	9_684160	9_975841	0.121533	3.21074	0.00223124	0.386011	no gene	no CpG island	DMRT3	28	17	11
tumor	22_40669648	22_40041767	-0.165024	-3.20855	0.00224557	0.386802	CACNA1I	no CpG island	no promoter	27	25	4
tumor	19_49267882	19_49939457	-0.140125	-3.20825	0.00224756	0.386802	SLC17A7	no CpG island	no promoter	48	5	3
tumor	11_225196	11_236952	0.0623011	3.2082	0.00224784	0.386802	PSMD13	known CpG island	PSMD13	48	8	0
tumor	19_49267882	19_50037085	0.117457	3.20747	0.00225262	0.386802	RCN3	known CpG island	no promoter	48	5	3
tumor	2_67090367	2_66662747	0.0756044	3.20718	0.00225453	0.386802	MEIS1	no CpG island	no promoter	50	6	0
tumor	5_1283755	5_1176274	-0.118418	-3.20716	0.00225467	0.386802	CTD-3080P12.3	no CpG island	no promoter	36	17	3
tumor	6_152562271	6_152589260	-0.0951213	-3.20666	0.00225798	0.386802	SYNE1	no CpG island	no promoter	34	20	2
tumor	9_815682	9_970581	0.126571	3.20662	0.0022582	0.386802	no gene	known CpG island	no promoter	30	20	6
tumor	1_22450487	1_22906124	0.198316	3.20501	0.00226887	0.386802	EPHA8	no CpG island	no promoter	40	15	1
tumor	X_70022420	X_70390672	0.164019	3.20434	0.00227325	0.386802	NLGN3	no CpG island	no promoter	7	27	22
tumor	9_876418	9_969972	-0.14824	-3.20412	0.00227476	0.386802	no gene	known CpG island	no promoter	33	17	6
tumor	19_49267882	19_49128404	-0.111759	-3.20313	0.00228129	0.386802	SPHK2	no CpG island	no promoter	48	5	3
tumor	5_176450837	5_176894385	0.0384392	3.20254	0.0022852	0.386802	DBN1	known CpG island	no promoter	4	40	12
tumor	11_108354102	11_107711659	0.114418	3.20143	0.00229264	0.386802	SLC35F2	no CpG island	no promoter	19	28	9
tumor	11_35085453	11_34285372	0.154311	3.20116	0.00229445	0.386802	ABTB2	no CpG island	no promoter	19	21	16
tumor	9_684160	9_969998	0.121982	3.20102	0.00229537	0.386802	no gene	known CpG island	no promoter	28	17	11
tumor	19_49267882	19_49375600	0.0230069	3.20045	0.00229917	0.386802	no gene	known CpG island	PPP1R15A	48	5	3
tumor	X_70022420	X_70775891	0.0792585	3.19967	0.00230439	0.386802	OGT	no CpG island	no promoter	7	27	22
tumor	11_35085453	11_35442121	0.108942	3.1996	0.00230486	0.386802	RP4-683L5.1	no CpG island	no promoter	19	21	16
tumor	5_1283755	5_1282413	-0.117681	-3.19927	0.00230708	0.386802	TERT	no CpG island	no promoter	36	17	3
tumor	11_225196	11_1107565	-0.436019	-3.19908	0.00230839	0.386802	no gene	no CpG island	no promoter	48	8	0
tumor	5_1286516	5_1879029	0.147515	3.19904	0.0023086	0.386802	IRX4	known CpG island	no promoter	7	29	20
tumor	1_22450487	1_21503334	0.014178	3.199	0.00230887	0.386802	EIF4G3	known CpG island	no promoter	40	15	1
tumor	5_1286516	5_1477176	-0.0321874	-3.19892	0.0023094	0.386802	LPCAT1	no CpG island	no promoter	7	29	20
tumor	1_22507684	1_23346491	0.0775313	3.19857	0.00231177	0.386802	KDM1A	known CpG island	KDM1A	32	24	0
tumor	11_35085453	11_35229448	0.0957457	3.19841	0.00231288	0.386802	CD44	no CpG island	no promoter	19	21	16
tumor	11_35085453	11_35440117	0.122071	3.19812	0.0023148	0.386802	SLC1A2	no CpG island	RP4-683L5.1	19	21	16
tumor	1_22507684	1_22470555	0.0726568	3.19787	0.00231647	0.386802	no gene	no CpG island	no promoter	32	24	0
tumor	6_152684585	6_151950310	-0.147415	-3.19765	0.00231799	0.386802	no gene	no CpG island	no promoter	28	25	3
tumor	11_35085453	11_35442129	0.103662	3.19698	0.00232251	0.386802	RP4-683L5.1	no CpG island	no promoter	19	21	16
tumor	5_176450837	5_176166552	-0.158403	-3.19676	0.00232397	0.386802	no gene	no CpG island	no promoter	4	40	12
tumor	5_1286516	5_1198391	-0.0938693	-3.19662	0.00232496	0.386802	no gene	no CpG island	no promoter	7	29	20
tumor	12_46831129	12_46662173	-0.0164294	-3.19641	0.00232635	0.386802	SLC38A1	known CpG island	no promoter	11	22	23
tumor	9_802228	9_973198	0.1578	3.19597	0.00232932	0.386839	no gene	known CpG island	no promoter	7	27	22
tumor	3_169514585	3_170184132	0.210824	3.19536	0.00233345	0.38707	CLDN11	no CpG island	no promoter	25	23	8
tumor	3_169514585	3_170184132	0.210824	3.19536	0.00233345	0.38707	SLC7A14	no CpG island	no promoter	25	23	8
tumor	11_225196	11_829320	0.28423	3.19447	0.00233953	0.38743	AP006621.8	known CpG island	no promoter	48	8	0
tumor	11_225196	11_829320	0.28423	3.19447	0.00233953	0.38743	EFCAB4A	known CpG island	no promoter	48	8	0
tumor	5_1283755	5_1801586	0.0319077	3.19382	0.00234394	0.38743	NDUFS6	known CpG island	NDUFS6	36	17	3
tumor	11_35085453	11_35547925	0.0987823	3.19319	0.00234823	0.38743	PAMR1	no CpG island	no promoter	19	21	16
tumor	5_176450837	5_176692687	-0.0285311	-3.1929	0.0023502	0.38743	NSD1	no CpG island	CTD-2301A4.3	4	40	12
tumor	5_176450837	5_176692687	-0.0285311	-3.1929	0.0023502	0.38743	CTD-2301A4.5	no CpG island	CTD-2301A4.3	4	40	12
tumor	9_876418	9_1048960	-0.0920974	-3.19276	0.00235116	0.38743	no gene	no CpG island	DMRT2	33	17	6
tumor	1_22450487	1_23345468	0.0401456	3.19203	0.00235617	0.38743	no gene	no CpG island	KDM1A	40	15	1
tumor	19_49267882	19_49925813	0.032754	3.19159	0.00235922	0.38743	PTH2	known CpG island	CTD-3148I10.1	48	5	3
tumor	5_1288547	5_1728523	0.063824	3.1915	0.00235977	0.38743	no gene	no CpG island	no promoter	2	17	37
tumor	1_22450487	1_21754943	0.138542	3.1911	0.00236253	0.38743	HS6ST1P1	known CpG island	HS6ST1P1	40	15	1
tumor	12_46798900	12_46865385	-0.0964825	-3.19102	0.0023631	0.38743	no gene	no CpG island	no promoter	16	28	12
tumor	1_22450487	1_21904446	-0.106543	-3.19029	0.0023681	0.387648	ALPL	no CpG island	no promoter	40	15	1
tumor	11_108354102	11_107992005	0.0419341	3.1894	0.00237427	0.387648	RP11-144G7.2	known CpG island	ACAT1	19	28	9
tumor	3_128122820	3_128765425	0.14788	3.18854	0.00238019	0.387648	RP11-434H6.2	known CpG island	RP11-434H6.2	35	16	5
tumor	3_128122820	3_128722291	0.0917732	3.18824	0.00238225	0.387648	EFCC1	known CpG island	no promoter	35	16	5
tumor	5_176450837	5_176836423	0.0792014	3.18769	0.0023861	0.387648	F12	no CpG island	no promoter	4	40	12
tumor	5_176450837	5_176836423	0.0792014	3.18769	0.0023861	0.387648	GRK6	no CpG island	no promoter	4	40	12
tumor	16_51481596	16_50699442	0.0352233	3.18751	0.00238731	0.387648	no gene	no CpG island	RP11-401P9.5	46	9	1
tumor	9_876418	9_975856	-0.138153	-3.1875	0.0023874	0.387648	no gene	no CpG island	DMRT3	33	17	6
tumor	9_802228	9_974099	0.12644	3.187	0.00239084	0.387648	no gene	no CpG island	no promoter	7	27	22
tumor	12_46798900	12_47219768	-0.109914	-3.18669	0.00239304	0.387648	SLC38A4	no CpG island	no promoter	16	28	12
tumor	9_802228	9_974468	0.155346	3.18649	0.0023944	0.387648	no gene	no CpG island	no promoter	7	27	22
tumor	1_22507684	1_22615727	-0.0557546	-3.18612	0.002397	0.387648	no gene	no CpG island	no promoter	32	24	0
tumor	2_11721535	2_12557068	-0.0562196	-3.18606	0.00239742	0.387648	AC096559.1	no CpG island	no promoter	25	23	8
tumor	11_225196	11_693013	-0.0812109	-3.1848	0.0024062	0.388622	DEAF1	no CpG island	EPS8L2	48	8	0
tumor	22_40669648	22_40018992	0.149363	3.18378	0.00241331	0.388903	CACNA1I	no CpG island	no promoter	27	25	4
tumor	5_1286516	5_1807355	-0.0538114	-3.18376	0.00241346	0.388903	NDUFS6	no CpG island	no promoter	7	29	20
tumor	11_108354102	11_108535187	0.141088	3.18297	0.00241896	0.389345	no gene	no CpG island	DDX10	19	28	9
tumor	5_176450837	5_176239571	0.0611878	3.18258	0.00242172	0.389345	UNC5A	no CpG island	no promoter	4	40	12
normal	9_684160	9_968124	0.0882217	3.68053	0.000824923	0.389976	DMRT1	no CpG island	no promoter	21	10	4
tumor	6_152684585	6_153603882	-0.130479	-3.18111	0.00243207	0.390564	AL590867.1	no CpG island	no promoter	28	25	3
normal	5_1283755	5_784645	0.0571895	3.67844	0.00082972	0.390998	ZDHHC11	known CpG island	no promoter	18	14	3
normal	19_22652436	19_22034729	0.0405985	3.67439	0.000839079	0.391678	ZNF43	known CpG island	no promoter	28	5	2
normal	19_22652436	19_23456987	0.00773304	3.67439	0.000839079	0.391678	RP11-15H20.7	no CpG island	no promoter	28	5	2
normal	19_22652436	19_23456987	0.00773304	3.67439	0.000839079	0.391678	RP11-15H20.6	no CpG island	no promoter	28	5	2
normal	19_22652436	19_23432773	0.0270656	3.67439	0.000839079	0.391678	ZNF724P	no CpG island	no promoter	28	5	2
normal	5_1286516	5_1087173	-0.0643357	-3.67246	0.0008436	0.392007	SLC12A7	known CpG island	no promoter	6	22	7
normal	19_49267882	19_50145212	0.0304882	3.67183	0.000845065	0.392007	no gene	known CpG island	SCAF1	32	2	1
normal	X_131312089	X_130937426	-0.201441	-3.66844	0.00085304	0.394474	RP11-453F18__B.1	no CpG island	no promoter	14	18	3
normal	X_131312089	X_130937426	-0.201441	-3.66844	0.00085304	0.394474	RP1-197O17.2	no CpG island	no promoter	14	18	3
tumor	19_22652436	19_22778901	0.12129	3.17725	0.00245948	0.394516	CTC-457E21.10	no CpG island	CTC-457E21.3	37	15	4
tumor	9_815682	9_970193	0.0798652	3.17672	0.00246323	0.394668	no gene	known CpG island	no promoter	30	20	6
normal	9_684160	9_970138	0.11231	3.66687	0.000856749	0.394959	no gene	known CpG island	no promoter	21	10	4
tumor	6_152546094	6_152555112	-0.155519	-3.17569	0.00247058	0.394984	SYNE1	no CpG island	no promoter	7	24	25
tumor	6_152684585	6_152640279	-0.165109	-3.17566	0.00247081	0.394984	SYNE1	no CpG island	no promoter	28	25	3
tumor	X_70093038	X_70503517	-0.103281	-3.17475	0.00247733	0.395004	NONO	known CpG island	NONO	9	37	10
tumor	5_1286516	5_1886278	0.0780398	3.17419	0.00248138	0.395004	IRX4	known CpG island	CTD-2194D22.4	7	29	20
tumor	5_1283755	5_946337	0.0352116	3.17394	0.00248318	0.395004	no gene	no CpG island	RP11-661C8.2	36	17	3
tumor	5_1283755	5_504611	-0.139636	-3.17378	0.00248429	0.395004	SLC9A3	no CpG island	no promoter	36	17	3
tumor	X_70149078	X_70797813	-0.0884353	-3.17369	0.00248494	0.395004	no gene	no CpG island	ACRC	21	26	9
tumor	11_35085453	11_35442131	0.115112	3.17258	0.00249299	0.395395	RP4-683L5.1	no CpG island	no promoter	19	21	16
tumor	10_105674854	10_105344174	-0.132882	-3.17226	0.00249526	0.395395	NEURL	known CpG island	no promoter	8	10	38
tumor	9_815682	9_973040	0.126105	3.17209	0.00249649	0.395395	no gene	known CpG island	no promoter	30	20	6
tumor	12_46798900	12_46660800	-0.067248	-3.1718	0.00249861	0.395395	SLC38A1	no CpG island	no promoter	16	28	12
tumor	11_35085453	11_34296462	0.0501885	3.17124	0.0025027	0.395597	ABTB2	no CpG island	no promoter	19	21	16
tumor	9_815682	9_972991	0.136334	3.17003	0.00251147	0.39654	no gene	known CpG island	no promoter	30	20	6
tumor	5_1283755	5_2137336	0.169695	3.16937	0.00251622	0.396737	no gene	no CpG island	no promoter	36	17	3
tumor	1_22450487	1_21565757	-0.03913	-3.16908	0.00251835	0.396737	ECE1	no CpG island	no promoter	40	15	1
normal	11_225196	11_888964	-0.136796	-3.66341	0.000865007	0.396903	CHID1	known CpG island	no promoter	30	5	0
normal	5_1283755	5_1344845	0.0331283	3.6628	0.000866468	0.396903	CLPTM1L	known CpG island	no promoter	18	14	3
normal	9_684160	9_972991	0.0943645	3.66175	0.000868988	0.396903	no gene	known CpG island	no promoter	21	10	4
tumor	22_40669648	22_39716869	-0.0804533	-3.16778	0.0025279	0.397797	no gene	no CpG island	no promoter	27	25	4
tumor	5_1283755	5_1431238	-0.154119	-3.16661	0.00253645	0.398003	SLC6A3	no CpG island	no promoter	36	17	3
tumor	11_35085453	11_35993696	0.112636	3.16645	0.00253764	0.398003	LDLRAD3	no CpG island	RP5-916O11.2	19	21	16
tumor	3_128122820	3_128968499	0.0218639	3.16644	0.00253767	0.398003	COPG1	known CpG island	COPG1	35	16	5
tumor	1_22450487	1_22902724	0.192324	3.16582	0.00254228	0.398024	EPHA8	no CpG island	no promoter	40	15	1
tumor	11_225196	11_536331	-0.203959	-3.16532	0.00254596	0.398024	HRAS	known CpG island	LRRC56	48	8	0
tumor	11_225196	11_288333	0.170813	3.16519	0.0025469	0.398024	RP11-326C3.2	no CpG island	ATHL1	48	8	0
tumor	5_1283755	5_1857578	-0.142488	-3.16471	0.00255042	0.398024	no gene	known CpG island	no promoter	36	17	3
tumor	5_1286516	5_1552442	-0.0307636	-3.16438	0.00255283	0.398024	no gene	no CpG island	no promoter	7	29	20
tumor	12_46798900	12_47219784	-0.108338	-3.16412	0.00255475	0.398024	SLC38A4	no CpG island	no promoter	16	28	12
normal	10_105674854	10_104678616	-0.0230421	-3.65708	0.000880285	0.398963	CNNM2	known CpG island	CNNM2	2	8	25
normal	11_225196	11_290005	-0.341945	-3.65658	0.000881516	0.398963	ATHL1	known CpG island	ATHL1	30	5	0
normal	5_1288547	5_307868	-0.0562215	-3.65656	0.000881561	0.398963	PDCD6	no CpG island	no promoter	2	13	20
normal	5_1288547	5_307868	-0.0562215	-3.65656	0.000881561	0.398963	AHRR	no CpG island	no promoter	2	13	20
tumor	22_40669648	22_41252256	0.024163	3.16255	0.00256638	0.399159	ST13	known CpG island	XPNPEP3	27	25	4
tumor	9_815682	9_973434	0.152217	3.16238	0.0025677	0.399159	no gene	no CpG island	no promoter	30	20	6
tumor	11_32370380	11_32448035	-0.315988	-3.16095	0.00257833	0.399348	WT1	no CpG island	no promoter	48	8	0
tumor	12_46831129	12_46662074	-0.0135102	-3.16053	0.00258142	0.399348	SLC38A1	known CpG island	no promoter	11	22	23
tumor	5_176450837	5_175957064	0.109247	3.16039	0.0025825	0.399348	RNF44	no CpG island	no promoter	4	40	12
tumor	9_815682	9_968087	0.14102	3.16026	0.00258343	0.399348	DMRT1	no CpG island	no promoter	30	20	6
tumor	1_22507684	1_22746927	0.185271	3.15974	0.00258735	0.399348	no gene	no CpG island	no promoter	32	24	0
tumor	5_1286516	5_1644601	-0.105292	-3.15971	0.00258753	0.399348	no gene	no CpG island	no promoter	7	29	20
tumor	3_128122820	3_128336857	0.0317623	3.15955	0.00258874	0.399348	no gene	known CpG island	no promoter	35	16	5
normal	22_40669648	22_41601352	0.0153056	3.65406	0.000887679	0.400511	L3MBTL2	known CpG island	L3MBTL2	17	15	3
normal	19_22652436	19_22018825	0.0179604	3.65288	0.000890574	0.400599	ZNF43	known CpG island	no promoter	28	5	2
normal	5_176450837	5_176794686	-0.20838	-3.65079	0.000895744	0.400724	RGS14	known CpG island	no promoter	2	22	11
normal	5_1283755	5_1487130	0.118353	3.64895	0.000900305	0.400724	LPCAT1	no CpG island	no promoter	18	14	3
normal	11_225196	11_797550	0.0213854	3.64846	0.00090154	0.400724	SLC25A22	no CpG island	no promoter	30	5	0
normal	11_225196	11_747520	0.0333333	3.64841	0.00090165	0.400724	TALDO1	known CpG island	TALDO1	30	5	0
tumor	3_169514585	3_169387070	0.0639029	3.15769	0.00260269	0.400807	no gene	known CpG island	no promoter	25	23	8
tumor	5_1288547	5_1645320	-0.0170355	-3.1573	0.00260566	0.400807	no gene	known CpG island	no promoter	2	17	37
tumor	11_35085453	11_34159594	0.0954918	3.15709	0.0026072	0.400807	NAT10	no CpG island	no promoter	19	21	16
tumor	9_876418	9_971564	-0.149143	-3.15678	0.00260957	0.400807	no gene	known CpG island	no promoter	33	17	6
tumor	22_40669648	22_40659891	0.147691	3.15573	0.00261752	0.401183	TNRC6B	no CpG island	no promoter	27	25	4
tumor	1_22450487	1_22678063	0.0302501	3.15514	0.00262195	0.401183	no gene	no CpG island	no promoter	40	15	1
tumor	10_105674854	10_105412634	0.104286	3.15489	0.00262384	0.401183	SH3PXD2A	no CpG island	no promoter	8	10	38
tumor	11_225196	11_988599	-0.0495699	-3.15416	0.00262938	0.401183	AP2A2	no CpG island	no promoter	48	8	0
tumor	9_815682	9_970712	0.154872	3.15415	0.00262949	0.401183	no gene	known CpG island	no promoter	30	20	6
tumor	12_46798900	12_47224823	-0.0731866	-3.15396	0.00263091	0.401183	SLC38A4	no CpG island	no promoter	16	28	12
tumor	5_1286516	5_1880056	0.102958	3.15383	0.00263193	0.401183	IRX4	no CpG island	no promoter	7	29	20
normal	19_22652436	19_23578299	0.0421757	3.64635	0.000906806	0.401398	ZNF91	no CpG island	no promoter	28	5	2
normal	19_22652436	19_22605168	0.0598392	3.64489	0.000910487	0.401398	ZNF98	no CpG island	AC011516.1	28	5	2
normal	5_1283755	5_312970	0.123998	3.64377	0.000913307	0.401398	PDCD6	no CpG island	no promoter	18	14	3
normal	5_1283755	5_312970	0.123998	3.64377	0.000913307	0.401398	AHRR	no CpG island	no promoter	18	14	3
normal	9_876418	9_969581	-0.140502	-3.6435	0.000913983	0.401398	no gene	known CpG island	no promoter	19	12	4
tumor	1_22450487	1_23345364	0.186892	3.15303	0.00263796	0.401668	no gene	no CpG island	KDM1A	40	15	1
normal	2_67090367	2_66671813	0.176651	3.64162	0.000918744	0.401895	MEIS1	no CpG island	no promoter	31	4	0
normal	5_1283755	5_923619	0.169561	3.64092	0.000920528	0.401895	no gene	no CpG island	no promoter	18	14	3
tumor	9_876418	9_974820	-0.161321	-3.15197	0.00264607	0.401968	no gene	no CpG island	no promoter	33	17	6
tumor	13_41179798	13_41173546	0.0681516	3.15152	0.00264948	0.401968	FOXO1	no CpG island	no promoter	28	23	5
tumor	9_815682	9_975576	0.123595	3.15151	0.00264955	0.401968	no gene	no CpG island	DMRT3	30	20	6
tumor	3_128122820	3_127308569	0.0167647	3.15128	0.00265133	0.401968	TPRA1	known CpG island	no promoter	35	16	5
normal	6_152562271	6_152804780	-0.0599913	-3.63895	0.000925536	0.402896	SYNE1	no CpG island	no promoter	21	12	2
tumor	5_1283755	5_1154907	-0.0582038	-3.14999	0.00266121	0.403032	no gene	no CpG island	no promoter	36	17	3
tumor	11_32368744	11_33060958	-0.0114943	-3.14954	0.00266472	0.40313	no gene	known CpG island	TCP11L1	16	34	6
tumor	11_32459923	11_31836343	0.0993053	3.14894	0.00266933	0.403395	PAX6	known CpG island	no promoter	32	24	0
tumor	11_32459923	11_31836343	0.0993053	3.14894	0.00266933	0.403395	RCN1	known CpG island	no promoter	32	24	0
tumor	5_1286516	5_851078	-0.145557	-3.14758	0.00267976	0.403537	ZDHHC11	no CpG island	no promoter	7	29	20
tumor	5_1286516	5_851078	-0.145557	-3.14758	0.00267976	0.403537	BRD9	no CpG island	no promoter	7	29	20
tumor	5_1288547	5_1645656	-0.116318	-3.14723	0.00268247	0.403537	no gene	known CpG island	no promoter	2	17	37
tumor	5_1283755	5_1857960	-0.0367158	-3.14647	0.00268836	0.403537	no gene	known CpG island	no promoter	36	17	3
tumor	X_70022420	X_69643744	0.128721	3.14644	0.0026886	0.403537	GDPD2	no CpG island	GDPD2	7	27	22
tumor	19_49267882	19_49669421	-0.206678	-3.14598	0.00269218	0.403537	TRPM4	known CpG island	no promoter	48	5	3
tumor	11_35085453	11_35019666	0.0389215	3.14585	0.00269318	0.403537	PDHX	no CpG island	no promoter	19	21	16
tumor	5_1283755	5_1881829	0.11253	3.14562	0.002695	0.403537	IRX4	no CpG island	no promoter	36	17	3
tumor	3_128122820	3_127392370	0.0743507	3.14524	0.00269792	0.403537	ABTB1	known CpG island	ABTB1	35	16	5
tumor	5_1283755	5_1095971	-0.030349	-3.14504	0.00269951	0.403537	SLC12A7	no CpG island	no promoter	36	17	3
tumor	9_876418	9_970505	-0.13141	-3.14494	0.00270026	0.403537	no gene	known CpG island	no promoter	33	17	6
tumor	19_49267882	19_48917798	-0.0874146	-3.14475	0.00270175	0.403537	GRIN2D	no CpG island	no promoter	48	5	3
tumor	5_1283755	5_1097727	-0.0382218	-3.14323	0.00271361	0.404267	SLC12A7	no CpG island	no promoter	36	17	3
tumor	11_35085453	11_34126170	0.0984688	3.14316	0.00271415	0.404267	no gene	no CpG island	NAT10	19	21	16
tumor	11_35085453	11_36078872	-0.0586551	-3.14302	0.00271524	0.404267	LDLRAD3	no CpG island	no promoter	19	21	16
normal	11_225196	11_206787	0.0256328	3.63497	0.000935787	0.40438	BET1L	no CpG island	RIC8A	30	5	0
normal	1_22450487	1_21629688	0.107568	3.63441	0.000937235	0.40438	ECE1	no CpG island	no promoter	23	12	0
normal	6_152543949	6_151818838	-0.0430284	-3.63408	0.000938096	0.40438	CCDC170	no CpG island	no promoter	21	13	1
normal	11_107999907	11_107879226	0.230905	3.6334	0.000939843	0.40438	no gene	no CpG island	CUL5	31	4	0
normal	X_70022420	X_70828753	0.0911449	3.63037	0.00094774	0.405402	ACRC	no CpG island	no promoter	5	15	15
normal	11_225196	11_556970	-0.268628	-3.6295	0.000950018	0.405402	C11orf35	no CpG island	RP11-496I9.1	30	5	0
normal	5_1283755	5_1910253	-0.0383373	-3.6289	0.000951589	0.405402	no gene	no CpG island	no promoter	18	14	3
normal	11_32459923	11_32851819	0.0590467	3.62831	0.000953141	0.405402	PRRG4	known CpG island	PRRG4	23	12	0
tumor	6_152562271	6_152958393	0.0179666	3.1411	0.00273032	0.405862	SYNE1	known CpG island	no promoter	34	20	2
tumor	9_876418	9_974476	-0.180283	-3.14091	0.00273183	0.405862	no gene	no CpG island	no promoter	33	17	6
tumor	12_46831129	12_46662340	-0.0240701	-3.13994	0.00273949	0.405862	SLC38A1	known CpG island	no promoter	11	22	23
tumor	X_70022420	X_70613145	0.0969806	3.13989	0.00273987	0.405862	TAF1	no CpG island	no promoter	7	27	22
tumor	5_1288547	5_663103	-0.0214946	-3.13983	0.00274034	0.405862	CEP72	known CpG island	no promoter	2	17	37
tumor	5_1288547	5_663103	-0.0214946	-3.13983	0.00274034	0.405862	TPPP	known CpG island	no promoter	2	17	37
tumor	19_49267882	19_49228097	-0.0859376	-3.13933	0.00274425	0.406013	RASIP1	no CpG island	no promoter	48	5	3
normal	3_128122820	3_128055577	-0.0299408	-3.62662	0.00095761	0.406139	EEFSEC	no CpG island	no promoter	20	10	5
tumor	9_684160	9_505408	0.0150015	3.1388	0.00274851	0.406217	KANK1	known CpG island	no promoter	28	17	11
tumor	5_1288547	5_771945	0.10425	3.13759	0.0027581	0.406814	ZDHHC11	no CpG island	no promoter	2	17	37
tumor	5_1283755	5_863749	-0.0930734	-3.13756	0.00275831	0.406814	BRD9	no CpG island	no promoter	36	17	3
tumor	19_49267882	19_49990916	0.0272047	3.13674	0.00276479	0.407343	RPL13A	known CpG island	RPL13A	48	5	3
tumor	X_131171122	X_130192221	0.15315	3.13622	0.00276897	0.407533	ARHGAP36	known CpG island	ARHGAP36	36	15	5
tumor	11_32459923	11_32912612	-0.200058	-3.13502	0.00277856	0.408518	no gene	no CpG island	no promoter	32	24	0
tumor	9_876418	9_1051302	-0.108368	-3.13424	0.00278475	0.409001	DMRT2	no CpG island	DMRT2	33	17	6
normal	11_225196	11_208319	0.0306637	3.62137	0.000971581	0.409764	RIC8A	known CpG island	RIC8A	30	5	0
normal	1_22450487	1_22963407	-0.0968715	-3.6207	0.000973378	0.409764	C1QA	no CpG island	C1QA	23	12	0
normal	3_128122820	3_128572709	-0.0603518	-3.6203	0.00097444	0.409764	no gene	no CpG island	no promoter	20	10	5
tumor	6_152562271	6_152506734	0.170794	3.13223	0.00280092	0.410949	SYNE1	no CpG island	no promoter	34	20	2
tumor	X_70149078	X_70320641	-0.120261	-3.13151	0.00280671	0.411164	FOXO4	no CpG island	no promoter	21	26	9
tumor	19_49267882	19_48794600	0.0120838	3.1312	0.00280925	0.411164	no gene	known CpG island	no promoter	48	5	3
tumor	5_1283755	5_1487594	-0.0573172	-3.13097	0.00281114	0.411164	LPCAT1	no CpG island	no promoter	36	17	3
tumor	11_225196	11_637541	0.179241	3.12846	0.00283149	0.413712	DRD4	known CpG island	DRD4	48	8	0
tumor	5_1288547	5_1298644	-0.177424	-3.12786	0.00283636	0.413869	no gene	no CpG island	no promoter	2	17	37
tumor	5_1283755	5_2137400	0.158657	3.1276	0.00283844	0.413869	no gene	no CpG island	no promoter	36	17	3
tumor	3_169514585	3_169492002	-0.0654045	-3.12679	0.00284509	0.414003	MYNN	no CpG island	no promoter	25	23	8
tumor	X_70093038	X_70355964	-0.109775	-3.12677	0.00284523	0.414003	MED12	no CpG island	no promoter	9	37	10
tumor	6_152546094	6_152632526	0.073428	3.12624	0.00284957	0.414207	SYNE1	no CpG island	no promoter	7	24	25
tumor	5_1288547	5_1952975	0.188842	3.12502	0.00285955	0.415088	RP11-259O2.1	no CpG island	no promoter	2	17	37
tumor	5_1283755	5_1201033	-0.0573835	-3.12478	0.00286152	0.415088	no gene	no CpG island	SLC6A19	36	17	3
tumor	10_105674854	10_106093891	0.121632	3.12431	0.00286543	0.415228	ITPRIP	no CpG island	no promoter	8	10	38
tumor	9_815682	9_972902	0.143047	3.12308	0.00287559	0.416273	no gene	known CpG island	no promoter	30	20	6
tumor	9_815682	9_972555	0.144793	3.1226	0.00287954	0.416417	no gene	known CpG island	no promoter	30	20	6
tumor	11_108168995	11_108009926	0.182057	3.12124	0.0028908	0.417616	ACAT1	no CpG island	no promoter	34	20	2
normal	5_1283755	5_405356	0.044513	3.61157	0.000998179	0.418561	AHRR	no CpG island	no promoter	18	14	3
tumor	12_46798900	12_47219920	-0.127144	-3.11955	0.00290485	0.418576	SLC38A4	no CpG island	no promoter	16	28	12
tumor	5_1288547	5_1728518	0.0536094	3.11927	0.00290719	0.418576	no gene	no CpG island	no promoter	2	17	37
tumor	9_802228	9_974704	0.139499	3.11907	0.00290885	0.418576	no gene	no CpG island	no promoter	7	27	22
tumor	10_105674854	10_105630936	-0.102775	-3.1186	0.00291279	0.418576	no gene	no CpG island	no promoter	8	10	38
tumor	9_802228	9_969473	0.103175	3.11852	0.00291348	0.418576	no gene	no CpG island	no promoter	7	27	22
tumor	5_1288547	5_2149567	-0.171606	-3.11831	0.00291525	0.418576	no gene	no CpG island	no promoter	2	17	37
tumor	6_152546094	6_153471498	0.110206	3.11743	0.00292262	0.418806	no gene	no CpG island	no promoter	7	24	25
tumor	5_1286516	5_420094	-0.062498	-3.11733	0.00292341	0.418806	AHRR	no CpG island	no promoter	7	29	20
tumor	9_876418	9_505685	0.0397785	3.117	0.00292616	0.418806	KANK1	known CpG island	no promoter	33	17	6
tumor	1_22507684	1_21923109	-0.0660531	-3.1167	0.00292874	0.418806	RAP1GAP	no CpG island	no promoter	32	24	0
tumor	11_32459923	11_32852559	-0.044914	-3.11617	0.00293321	0.418925	PRRG4	no CpG island	no promoter	32	24	0
tumor	9_876418	9_972827	-0.144588	-3.11589	0.00293551	0.418925	no gene	known CpG island	no promoter	33	17	6
tumor	9_876418	9_975418	-0.119378	-3.1146	0.00294641	0.419576	no gene	no CpG island	DMRT3	33	17	6
tumor	11_108354102	11_108983410	0.179831	3.11442	0.00294791	0.419576	no gene	no CpG island	no promoter	19	28	9
tumor	6_152546094	6_153218631	0.0867437	3.11404	0.00295113	0.419576	no gene	no CpG island	TUBB4BP7	7	24	25
tumor	9_815682	9_973091	0.134143	3.11372	0.00295384	0.419576	no gene	known CpG island	no promoter	30	20	6
tumor	11_32459923	11_32912825	-0.176183	-3.11359	0.00295495	0.419576	no gene	no CpG island	QSER1	32	24	0
tumor	5_1286516	5_1097654	0.0849642	3.11294	0.00296049	0.41994	SLC12A7	no CpG island	no promoter	7	29	20
tumor	9_876418	9_969596	-0.177834	-3.11249	0.00296426	0.420052	no gene	known CpG island	no promoter	33	17	6
normal	13_41179798	13_40746420	-0.116716	-3.609	0.00100528	0.420351	no gene	known CpG island	no promoter	15	16	4
tumor	5_176450837	5_176692647	-0.0656444	-3.11169	0.00297108	0.420596	NSD1	no CpG island	CTD-2301A4.3	4	40	12
tumor	5_176450837	5_176692647	-0.0656444	-3.11169	0.00297108	0.420596	CTD-2301A4.5	no CpG island	CTD-2301A4.3	4	40	12
tumor	9_876418	9_1048967	-0.127199	-3.11039	0.00298216	0.421374	no gene	no CpG island	DMRT2	33	17	6
tumor	11_108354102	11_107711836	0.0860197	3.11027	0.00298317	0.421374	SLC35F2	no CpG island	no promoter	19	28	9
tumor	9_802228	9_973159	0.142603	3.10977	0.00298744	0.421374	no gene	known CpG island	no promoter	7	27	22
tumor	22_40669648	22_41419024	0.0450466	3.10948	0.00298992	0.421374	no gene	no CpG island	no promoter	27	25	4
tumor	9_876418	9_505832	0.171478	3.1093	0.00299152	0.421374	KANK1	no CpG island	no promoter	33	17	6
tumor	5_1288547	5_759544	-0.159086	-3.10787	0.00300374	0.421643	ZDHHC11	no CpG island	no promoter	2	17	37
tumor	5_1288547	5_759544	-0.159086	-3.10787	0.00300374	0.421643	ZDHHC11B	no CpG island	no promoter	2	17	37
tumor	3_128122820	3_128598689	0.0127474	3.10784	0.00300402	0.421643	ACAD9	known CpG island	ACAD9	35	16	5
tumor	X_131578034	X_131352330	-0.152378	-3.10601	0.00301986	0.421643	RAP2C	known CpG island	no promoter	5	21	30
tumor	X_131578034	X_131352330	-0.152378	-3.10601	0.00301986	0.421643	RAP2C-AS1	known CpG island	no promoter	5	21	30
tumor	9_815682	9_970876	0.133816	3.1059	0.00302078	0.421643	no gene	known CpG island	no promoter	30	20	6
tumor	9_684160	9_1048710	0.110665	3.1057	0.00302246	0.421643	no gene	no CpG island	DMRT2	28	17	11
tumor	9_826585	9_972236	0.0678025	3.10483	0.00303003	0.421643	no gene	known CpG island	no promoter	9	25	22
tumor	12_46798900	12_46120227	-0.0146854	-3.10482	0.00303014	0.421643	LINC00938	no CpG island	no promoter	16	28	12
tumor	9_684160	9_686227	-0.125097	-3.10481	0.00303017	0.421643	KANK1	no CpG island	no promoter	28	17	11
tumor	1_22450487	1_22609324	-0.168526	-3.10399	0.00303731	0.421643	no gene	no CpG island	no promoter	40	15	1
tumor	9_876418	9_975079	-0.144663	-3.10381	0.00303889	0.421643	no gene	no CpG island	DMRT3	33	17	6
tumor	1_22450487	1_22843389	0.0476218	3.10368	0.00304001	0.421643	ZBTB40	no CpG island	ZBTB40-IT1	40	15	1
tumor	22_40669648	22_41487354	0.0173174	3.10333	0.00304311	0.421643	no gene	known CpG island	EP300	27	25	4
tumor	22_40669648	22_41487354	0.0173174	3.10333	0.00304311	0.421643	no gene	known CpG island	MIR1281	27	25	4
tumor	9_802228	9_976185	-0.0576039	-3.10312	0.00304489	0.421643	no gene	known CpG island	DMRT3	7	27	22
tumor	11_35085453	11_34378241	0.112854	3.10118	0.00306184	0.421643	ABTB2	known CpG island	no promoter	19	21	16
tumor	11_32459923	11_32458037	0.0221617	3.10012	0.00307116	0.421643	WT1-AS	no CpG island	WT1-AS	32	24	0
tumor	9_815682	9_972942	0.142296	3.09999	0.0030723	0.421643	no gene	known CpG island	no promoter	30	20	6
tumor	1_22507684	1_22470341	0.162704	3.09992	0.00307292	0.421643	WNT4	no CpG island	no promoter	32	24	0
tumor	X_70093038	X_70712124	-0.129401	-3.09986	0.00307339	0.421643	TAF1	known CpG island	no promoter	9	37	10
tumor	X_70093038	X_70712124	-0.129401	-3.09986	0.00307339	0.421643	INGX	known CpG island	no promoter	9	37	10
tumor	19_49267882	19_49939662	-0.184498	-3.09934	0.00307803	0.421643	SLC17A7	known CpG island	no promoter	48	5	3
tumor	6_152546094	6_151777612	0.0947743	3.09926	0.00307869	0.421643	C6orf211	no CpG island	no promoter	7	24	25
tumor	11_108354102	11_108362762	0.0136463	3.09912	0.00307998	0.421643	KDELC2	no CpG island	no promoter	19	28	9
tumor	5_1288547	5_2170554	-0.0624585	-3.09899	0.00308111	0.421643	no gene	no CpG island	no promoter	2	17	37
tumor	9_876418	9_1048649	-0.124132	-3.09805	0.00308942	0.421643	no gene	no CpG island	DMRT2	33	17	6
tumor	9_876418	9_469812	0.0212274	3.09804	0.00308948	0.421643	RP11-165F24.3	no CpG island	KANK1	33	17	6
tumor	9_876418	9_970511	-0.132071	-3.09781	0.0030915	0.421643	no gene	known CpG island	no promoter	33	17	6
tumor	19_49267882	19_50058932	-0.066996	-3.09758	0.00309351	0.421643	no gene	known CpG island	no promoter	48	5	3
tumor	5_1288547	5_759592	-0.179997	-3.09706	0.00309816	0.421643	ZDHHC11	no CpG island	no promoter	2	17	37
tumor	5_1288547	5_759592	-0.179997	-3.09706	0.00309816	0.421643	ZDHHC11B	no CpG island	no promoter	2	17	37
tumor	11_32368744	11_32455945	-0.0103598	-3.09681	0.00310031	0.421643	WT1	known CpG island	WT1-AS	16	34	6
tumor	5_1288547	5_1552064	-0.0252102	-3.09671	0.0031012	0.421643	no gene	no CpG island	no promoter	2	17	37
tumor	X_70149078	X_70889369	0.146356	3.09656	0.00310256	0.421643	no gene	no CpG island	no promoter	21	26	9
tumor	9_815682	9_972570	0.107892	3.09638	0.00310412	0.421643	no gene	known CpG island	no promoter	30	20	6
tumor	9_815682	9_969598	0.175198	3.09628	0.00310507	0.421643	no gene	known CpG island	no promoter	30	20	6
tumor	9_876418	9_505564	0.0314573	3.0955	0.00311198	0.421643	KANK1	known CpG island	no promoter	33	17	6
tumor	9_815682	9_975192	0.12703	3.09526	0.00311414	0.421643	no gene	no CpG island	DMRT3	30	20	6
tumor	11_35085453	11_35971837	0.0383555	3.09513	0.00311525	0.421643	LDLRAD3	no CpG island	no promoter	19	21	16
tumor	6_152546094	6_151562491	-0.0134966	-3.09504	0.00311609	0.421643	AKAP12	known CpG island	no promoter	7	24	25
tumor	5_1288547	5_759487	-0.147975	-3.09495	0.00311688	0.421643	ZDHHC11	no CpG island	no promoter	2	17	37
tumor	5_1288547	5_759487	-0.147975	-3.09495	0.00311688	0.421643	ZDHHC11B	no CpG island	no promoter	2	17	37
tumor	19_49267882	19_50084201	0.128323	3.09456	0.00312033	0.421643	NOSIP	no CpG island	PRRG2	48	5	3
tumor	19_49267882	19_50084201	0.128323	3.09456	0.00312033	0.421643	PRRG2	no CpG island	PRRG2	48	5	3
tumor	13_41179798	13_40746561	-0.109405	-3.0945	0.00312084	0.421643	no gene	known CpG island	no promoter	28	23	5
tumor	6_152543949	6_153471869	0.125568	3.0945	0.0031209	0.421643	no gene	no CpG island	no promoter	24	30	2
tumor	2_11702661	2_10827888	0.0879289	3.09402	0.00312516	0.421643	NOL10	no CpG island	no promoter	12	18	26
tumor	5_1288547	5_1140236	0.1072	3.09397	0.00312557	0.421643	no gene	no CpG island	no promoter	2	17	37
tumor	11_35085453	11_35440094	0.116697	3.09347	0.00313009	0.421643	SLC1A2	no CpG island	RP4-683L5.1	19	21	16
tumor	5_1283755	5_1407362	-0.0841702	-3.09335	0.00313111	0.421643	SLC6A3	no CpG island	no promoter	36	17	3
tumor	11_35085453	11_34378557	0.00912574	3.0932	0.00313249	0.421643	ABTB2	known CpG island	no promoter	19	21	16
tumor	5_176450837	5_176939124	-0.0304933	-3.09318	0.00313264	0.421643	DDX41	no CpG island	no promoter	4	40	12
tumor	5_1286516	5_1798781	-0.0827227	-3.09289	0.00313531	0.421643	MRPL36	no CpG island	no promoter	7	29	20
tumor	2_11702661	2_11053507	-0.0149886	-3.09265	0.00313744	0.421643	KCNF1	no CpG island	no promoter	12	18	26
tumor	5_176450837	5_176236753	-0.0238539	-3.09199	0.00314332	0.421643	no gene	no CpG island	UNC5A	4	40	12
tumor	5_1283755	5_1121064	-0.0956502	-3.09169	0.00314606	0.421643	no gene	no CpG island	no promoter	36	17	3
tumor	11_32370380	11_32193669	0.186844	3.09168	0.00314613	0.421643	RP1-65P5.1	no CpG island	no promoter	48	8	0
tumor	11_35085453	11_35440099	0.107624	3.09137	0.00314893	0.421643	SLC1A2	no CpG island	RP4-683L5.1	19	21	16
tumor	X_131171122	X_131548712	0.165962	3.09049	0.0031568	0.421902	RAP2C-AS1	no CpG island	no promoter	36	15	5
tumor	X_131171122	X_131548712	0.165962	3.09049	0.0031568	0.421902	MBNL3	no CpG island	no promoter	36	15	5
tumor	X_70093038	X_69283093	0.119805	3.09003	0.00316097	0.421902	OTUD6A	known CpG island	OTUD6A	9	37	10
tumor	5_1288547	5_1933981	0.175118	3.08998	0.00316146	0.421902	RP11-259O2.1	no CpG island	RP11-259O2.1	2	17	37
tumor	9_815682	9_974508	0.143393	3.08948	0.00316592	0.421902	no gene	no CpG island	no promoter	30	20	6
tumor	1_22450487	1_21652411	0.173585	3.08896	0.00317068	0.421902	ECE1	no CpG island	no promoter	40	15	1
tumor	5_1286516	5_1136717	0.185347	3.0886	0.00317392	0.421902	no gene	no CpG island	no promoter	7	29	20
tumor	11_35085453	11_35440147	0.111868	3.08844	0.00317532	0.421902	SLC1A2	no CpG island	RP4-683L5.1	19	21	16
tumor	9_876418	9_970882	-0.144244	-3.08824	0.00317713	0.421902	no gene	known CpG island	no promoter	33	17	6
tumor	9_876418	9_973516	-0.142794	-3.08817	0.00317779	0.421902	no gene	no CpG island	no promoter	33	17	6
normal	11_32370380	11_31839574	0.0722222	3.6066	0.00101195	0.421952	RCN1	known CpG island	no promoter	30	5	0
tumor	9_876418	9_1048732	-0.0881506	-3.08631	0.00319473	0.422515	no gene	no CpG island	DMRT2	33	17	6
tumor	5_1283755	5_1856783	-0.21887	-3.08619	0.00319578	0.422515	no gene	known CpG island	no promoter	36	17	3
tumor	11_108168995	11_108093671	0.0147796	3.08613	0.00319634	0.422515	ATM	known CpG island	ATM	34	20	2
tumor	1_22507684	1_22470343	0.175075	3.0858	0.00319935	0.422515	WNT4	no CpG island	no promoter	32	24	0
tumor	9_815682	9_975841	0.134816	3.08571	0.00320021	0.422515	no gene	no CpG island	DMRT3	30	20	6
tumor	10_105674854	10_105041358	0.106584	3.0856	0.0032012	0.422515	INA	no CpG island	no promoter	8	10	38
tumor	11_32370380	11_33182813	0.016561	3.08511	0.00320566	0.422515	CSTF3	no CpG island	CSTF3-AS1	48	8	0
tumor	11_35085453	11_35993538	0.105571	3.08503	0.00320639	0.422515	LDLRAD3	no CpG island	RP5-916O11.2	19	21	16
normal	6_152543949	6_151815071	0.0464607	3.60485	0.00101684	0.422803	no gene	known CpG island	CCDC170	21	13	1
tumor	9_815682	9_970119	0.148748	3.08401	0.00321578	0.423188	no gene	known CpG island	no promoter	30	20	6
tumor	2_11721535	2_11264820	0.0731248	3.08382	0.0032175	0.423188	AC062028.1	no CpG island	no promoter	25	23	8
tumor	5_1286516	5_1069531	-0.129775	-3.08201	0.00323418	0.424986	SLC12A7	no CpG island	no promoter	7	29	20
tumor	5_1286516	5_1857444	0.178054	3.08123	0.00324129	0.425154	no gene	known CpG island	no promoter	7	29	20
tumor	6_152546094	6_151774022	0.0107501	3.08121	0.00324149	0.425154	C6orf211	known CpG island	C6orf211	7	24	25
tumor	5_176450837	5_176236775	0.0113284	3.07993	0.00325333	0.425846	no gene	known CpG island	UNC5A	4	40	12
tumor	19_49267882	19_49001686	0.184068	3.07969	0.00325557	0.425846	LMTK3	no CpG island	no promoter	48	5	3
tumor	1_22450487	1_22147952	0.0666125	3.07951	0.00325724	0.425846	LDLRAD2	no CpG island	no promoter	40	15	1
tumor	5_1283755	5_1060399	0.0123484	3.07934	0.00325885	0.425846	SLC12A7	no CpG island	no promoter	36	17	3
tumor	19_49267882	19_50128923	0.125976	3.0781	0.0032704	0.426142	PRR12	no CpG island	no promoter	48	5	3
tumor	9_815682	9_1047608	0.144423	3.07787	0.00327248	0.426142	no gene	no CpG island	no promoter	30	20	6
tumor	5_1283755	5_1883736	0.0879635	3.07771	0.00327403	0.426142	IRX4	known CpG island	CTD-2194D22.3	36	17	3
tumor	2_11702661	2_11887936	0.0786722	3.07694	0.00328119	0.426142	LPIN1	no CpG island	no promoter	12	18	26
tumor	11_32370380	11_31847173	-0.247297	-3.07661	0.00328431	0.426142	RCN1	known CpG island	no promoter	48	8	0
tumor	5_1286516	5_502193	0.0871288	3.07645	0.0032858	0.426142	SLC9A3	no CpG island	no promoter	7	29	20
tumor	6_152684585	6_152589260	-0.0867858	-3.07639	0.00328629	0.426142	SYNE1	no CpG island	no promoter	28	25	3
tumor	19_22652436	19_23432963	0.0445479	3.07598	0.00329017	0.426142	ZNF724P	no CpG island	no promoter	37	15	4
tumor	11_225196	11_556623	0.250364	3.07592	0.00329078	0.426142	C11orf35	no CpG island	RP11-496I9.1	48	8	0
tumor	5_1288547	5_1885444	0.0943566	3.0757	0.00329282	0.426142	IRX4	known CpG island	no promoter	2	17	37
tumor	11_108354102	11_108345649	0.130997	3.07553	0.00329436	0.426142	KDELC2	no CpG island	no promoter	19	28	9
tumor	9_815682	9_273074	0.0221519	3.07521	0.00329741	0.426145	DOCK8	no CpG island	no promoter	30	20	6
tumor	11_225196	11_507701	0.0342262	3.0741	0.00330786	0.42625	no gene	known CpG island	no promoter	48	8	0
tumor	5_1283755	5_1557087	-0.0524479	-3.0736	0.00331254	0.42625	no gene	no CpG island	no promoter	36	17	3
tumor	5_1286516	5_1217797	-0.0781577	-3.07303	0.0033179	0.42625	SLC6A19	no CpG island	no promoter	7	29	20
tumor	3_128122820	3_127408609	-0.0395444	-3.0728	0.00332014	0.42625	MGLL	no CpG island	no promoter	35	16	5
tumor	3_128122820	3_128337109	0.0247329	3.07257	0.00332223	0.42625	no gene	known CpG island	no promoter	35	16	5
tumor	X_70149078	X_70823892	0.064301	3.07219	0.00332584	0.42625	ACRC	known CpG island	no promoter	21	26	9
tumor	X_131578034	X_131623380	0.128254	3.0717	0.00333049	0.42625	MBNL3	known CpG island	no promoter	5	21	30
tumor	6_152543949	6_151773299	0.0237074	3.07159	0.00333157	0.42625	no gene	known CpG island	C6orf211	24	30	2
tumor	12_46798900	12_46121317	-0.0145104	-3.0714	0.00333334	0.42625	LINC00938	known CpG island	no promoter	16	28	12
tumor	11_108168995	11_107879226	0.144242	3.07126	0.00333464	0.42625	no gene	no CpG island	CUL5	34	20	2
tumor	5_1286516	5_1342119	-0.0498221	-3.07088	0.00333826	0.42625	CLPTM1L	no CpG island	no promoter	7	29	20
tumor	5_176450837	5_176735959	-0.0614748	-3.0706	0.00334098	0.42625	MXD3	no CpG island	no promoter	4	40	12
tumor	11_225196	11_288326	0.177678	3.0705	0.00334187	0.42625	RP11-326C3.2	no CpG island	ATHL1	48	8	0
tumor	5_1283755	5_1107807	-0.0614201	-3.07032	0.00334361	0.42625	SLC12A7	no CpG island	no promoter	36	17	3
tumor	6_152543949	6_152804809	-0.144326	-3.06986	0.00334798	0.42625	SYNE1	no CpG island	no promoter	24	30	2
tumor	5_1288547	5_1052816	0.0566723	3.06963	0.00335023	0.42625	SLC12A7	no CpG island	no promoter	2	17	37
tumor	1_22507684	1_22920052	0.234028	3.06961	0.00335034	0.42625	EPHA8	known CpG island	no promoter	32	24	0
tumor	5_1286516	5_1282357	0.102543	3.06937	0.00335263	0.42625	TERT	no CpG island	no promoter	7	29	20
normal	2_11721535	2_11056425	-0.0855733	-3.59914	0.00103296	0.426271	no gene	no CpG island	no promoter	14	15	6
normal	5_1288547	5_2035100	0.0424083	3.59881	0.00103391	0.426271	no gene	no CpG island	no promoter	2	13	20
normal	5_176450837	5_175969050	-0.0669798	-3.59838	0.00103513	0.426271	no gene	no CpG island	CDHR2	2	22	11
normal	9_684160	9_973421	0.14248	3.59654	0.00104037	0.426271	no gene	no CpG island	no promoter	21	10	4
normal	5_1286516	5_1856256	-0.106675	-3.59563	0.00104299	0.426271	CTD-2194D22.2	no CpG island	no promoter	6	22	7
normal	19_49267882	19_48794362	0.0222608	3.59557	0.00104317	0.426271	no gene	known CpG island	no promoter	32	2	1
normal	5_176450837	5_177413503	0.13569	3.59414	0.00104726	0.426271	no gene	no CpG island	no promoter	2	22	11
normal	9_684160	9_969990	0.0791532	3.59384	0.00104815	0.426271	no gene	known CpG island	no promoter	21	10	4
normal	19_49267882	19_48744811	-0.20851	-3.59246	0.00105212	0.426374	ZNF114	no CpG island	no promoter	32	2	1
normal	19_49267882	19_48744811	-0.20851	-3.59246	0.00105212	0.426374	CARD8	no CpG island	no promoter	32	2	1
normal	6_152546094	6_151773639	-0.0106793	-3.59176	0.00105415	0.426374	C6orf211	known CpG island	C6orf211	7	13	15
tumor	9_815682	9_273072	0.0283632	3.06837	0.00336221	0.427083	DOCK8	no CpG island	no promoter	30	20	6
tumor	13_41179798	13_41345547	0.00842136	3.06765	0.00336909	0.427532	no gene	known CpG island	no promoter	28	23	5
tumor	5_1288547	5_1029579	0.129581	3.06722	0.00337325	0.427532	NKD2	no CpG island	no promoter	2	17	37
tumor	11_32459923	11_33081148	-0.0805984	-3.06705	0.00337485	0.427532	TCP11L1	no CpG island	no promoter	32	24	0
tumor	22_40669648	22_39810972	-0.0716986	-3.06669	0.00337828	0.427582	TAB1	no CpG island	no promoter	27	25	4
tumor	9_815682	9_973416	0.15093	3.06607	0.00338427	0.427811	no gene	no CpG island	no promoter	30	20	6
tumor	11_108354102	11_108370988	0.110941	3.06587	0.00338615	0.427811	no gene	no CpG island	no promoter	19	28	9
tumor	19_49267882	19_50145637	0.0262728	3.06468	0.00339768	0.428318	SCAF1	known CpG island	SCAF1	48	5	3
tumor	12_46831129	12_46121614	-0.0103601	-3.06456	0.00339881	0.428318	no gene	known CpG island	ARID2	11	22	23
tumor	6_152562271	6_152547148	-0.138552	-3.06451	0.00339928	0.428318	SYNE1	no CpG island	no promoter	34	20	2
tumor	3_128122820	3_128968506	0.0167377	3.06377	0.00340644	0.428559	COPG1	known CpG island	COPG1	35	16	5
tumor	11_225196	11_943712	-0.0338931	-3.06369	0.00340727	0.428559	AP2A2	no CpG island	no promoter	48	8	0
tumor	10_105674854	10_105344237	-0.148738	-3.06295	0.00341444	0.429078	NEURL	known CpG island	no promoter	8	10	38
tumor	5_1288547	5_1884045	-0.0275064	-3.06224	0.00342132	0.429246	IRX4	known CpG island	CTD-2194D22.3	2	17	37
tumor	X_70022420	X_70323946	-0.114564	-3.06211	0.00342254	0.429246	CXorf65	no CpG island	no promoter	7	27	22
tumor	11_225196	11_306625	-0.085023	-3.0616	0.00342752	0.429246	no gene	no CpG island	IFITM2	48	8	0
tumor	X_70149078	X_70433662	0.106206	3.06146	0.00342885	0.429246	no gene	no CpG island	GJB1	21	26	9
tumor	10_105674854	10_105595120	0.110577	3.06124	0.003431	0.429246	SH3PXD2A	no CpG island	no promoter	8	10	38
tumor	9_876418	9_971020	-0.132523	-3.06042	0.00343903	0.429534	no gene	known CpG island	no promoter	33	17	6
tumor	11_32459923	11_31836133	-0.0471805	-3.06038	0.00343939	0.429534	PAX6	known CpG island	no promoter	32	24	0
tumor	11_32459923	11_31836133	-0.0471805	-3.06038	0.00343939	0.429534	RCN1	known CpG island	no promoter	32	24	0
tumor	6_152546094	6_152589260	0.0751456	3.05948	0.00344819	0.429838	SYNE1	no CpG island	no promoter	7	24	25
tumor	11_35085453	11_34296474	0.033362	3.05919	0.00345109	0.429838	ABTB2	no CpG island	no promoter	19	21	16
tumor	11_35085453	11_35019742	0.0715286	3.05891	0.00345379	0.429838	PDHX	no CpG island	no promoter	19	21	16
tumor	11_32459923	11_31825851	0.106123	3.05832	0.00345954	0.429838	PAX6	known CpG island	no promoter	32	24	0
tumor	19_49267882	19_49183510	-0.0519909	-3.05777	0.00346502	0.429838	SEC1P	known CpG island	no promoter	48	5	3
tumor	X_70149078	X_70754018	0.102838	3.05758	0.00346683	0.429838	OGT	no CpG island	no promoter	21	26	9
tumor	9_876418	9_505661	0.0714807	3.05735	0.0034691	0.429838	KANK1	known CpG island	no promoter	33	17	6
tumor	1_22507684	1_22902724	0.187528	3.05653	0.00347725	0.429838	EPHA8	no CpG island	no promoter	32	24	0
tumor	11_32459923	11_31848660	-0.0782415	-3.05631	0.0034794	0.429838	RCN1	known CpG island	no promoter	32	24	0
tumor	X_131626317	X_131543710	0.140577	3.05622	0.00348032	0.429838	RAP2C-AS1	no CpG island	no promoter	35	21	0
tumor	X_131626317	X_131543710	0.140577	3.05622	0.00348032	0.429838	MBNL3	no CpG island	no promoter	35	21	0
tumor	X_70149078	X_70349681	-0.093662	-3.0562	0.00348048	0.429838	MED12	no CpG island	no promoter	21	26	9
tumor	9_815682	9_974961	0.146863	3.05611	0.00348133	0.429838	no gene	no CpG island	no promoter	30	20	6
tumor	5_176450837	5_176172876	-0.193642	-3.05609	0.00348156	0.429838	no gene	no CpG island	no promoter	4	40	12
tumor	9_876418	9_970551	-0.13508	-3.05549	0.00348753	0.429838	no gene	known CpG island	no promoter	33	17	6
tumor	5_1288547	5_481730	-0.1426	-3.05516	0.00349074	0.429838	SLC9A3	known CpG island	no promoter	2	17	37
tumor	11_35085453	11_35440158	0.103329	3.05511	0.00349129	0.429838	SLC1A2	no CpG island	RP4-683L5.1	19	21	16
tumor	9_802228	9_969804	0.12251	3.05454	0.00349692	0.429838	no gene	known CpG island	no promoter	7	27	22
tumor	1_22507684	1_21894615	-0.127065	-3.05438	0.00349851	0.429838	ALPL	no CpG island	no promoter	32	24	0
tumor	9_684160	9_967991	0.132907	3.05425	0.00349975	0.429838	DMRT1	no CpG island	no promoter	28	17	11
tumor	11_225196	11_287723	-0.217163	-3.05255	0.00351668	0.431542	RP11-326C3.2	no CpG island	RP11-326C3.2	48	8	0
tumor	11_225196	11_287723	-0.217163	-3.05255	0.00351668	0.431542	RP11-326C3.2	no CpG island	ATHL1	48	8	0
normal	5_1286516	5_1442824	-0.171417	-3.58604	0.00107088	0.431965	SLC6A3	no CpG island	no promoter	6	22	7
normal	X_131171122	X_131622950	-0.0619228	-3.58416	0.00107643	0.432263	MBNL3	no CpG island	no promoter	18	14	3
normal	6_152543949	6_153323916	0.0221466	3.58381	0.00107745	0.432263	no gene	known CpG island	no promoter	21	13	1
tumor	6_152684585	6_152567653	-0.112265	-3.05163	0.00352591	0.432298	SYNE1	no CpG island	no promoter	28	25	3
tumor	19_49267882	19_49977286	0.0218337	3.05086	0.00353359	0.432626	CTD-3148I10.9	no CpG island	FLT3LG	48	5	3
tumor	19_49267882	19_49977286	0.0218337	3.05086	0.00353359	0.432626	CTD-3148I10.9	no CpG island	CTD-3148I10.15	48	5	3
tumor	5_1283755	5_1836719	-0.0872015	-3.05065	0.00353567	0.432626	no gene	no CpG island	no promoter	36	17	3
tumor	5_1288547	5_1247334	-0.0840444	-3.05031	0.00353908	0.432626	no gene	no CpG island	no promoter	2	17	37
tumor	9_684160	9_973120	0.120393	3.04999	0.00354231	0.432626	no gene	known CpG island	no promoter	28	17	11
tumor	11_32459923	11_31532149	-0.149813	-3.04983	0.00354392	0.432626	ELP4	no CpG island	ELP4	32	24	0
tumor	9_802228	9_974458	0.144084	3.04905	0.00355171	0.433201	no gene	no CpG island	no promoter	7	27	22
tumor	5_1288547	5_343571	0.0488731	3.04801	0.00356227	0.43391	PDCD6	known CpG island	no promoter	2	17	37
tumor	5_1288547	5_343571	0.0488731	3.04801	0.00356227	0.43391	AHRR	known CpG island	no promoter	2	17	37
tumor	10_105674854	10_105240332	-0.0287223	-3.04787	0.00356368	0.43391	RP11-225H22.5	no CpG island	no promoter	8	10	38
tumor	3_169514585	3_168852374	-0.102861	-3.04731	0.00356933	0.434178	MECOM	no CpG island	no promoter	25	23	8
tumor	19_49267882	19_50145366	0.0113372	3.0469	0.00357344	0.434178	no gene	known CpG island	SCAF1	48	5	3
tumor	5_1288547	5_1089571	-0.129101	-3.04659	0.00357656	0.434178	SLC12A7	no CpG island	no promoter	2	17	37
tumor	11_32459923	11_32915878	-0.0217377	-3.04638	0.0035787	0.434178	QSER1	no CpG island	no promoter	32	24	0
tumor	9_802228	9_970679	0.139504	3.04589	0.00358372	0.434178	no gene	known CpG island	no promoter	7	27	22
tumor	11_225196	11_637553	0.271913	3.04582	0.00358435	0.434178	DRD4	known CpG island	DRD4	48	8	0
tumor	1_22507684	1_23061564	-0.0912399	-3.04545	0.00358816	0.434266	EPHB2	no CpG island	no promoter	32	24	0
normal	5_1286516	5_887858	-0.0363956	-3.58076	0.00108654	0.434738	BRD9	no CpG island	no promoter	6	22	7
tumor	11_225196	11_318214	0.0488711	3.04475	0.0035953	0.434756	no gene	no CpG island	RP11-326C3.11	48	8	0
tumor	10_105674854	10_105308024	-0.0379955	-3.04398	0.00360309	0.435083	NEURL	no CpG island	RP11-416N2.3	8	10	38
tumor	19_49267882	19_49140431	0.0154834	3.04388	0.00360417	0.435083	DBP	known CpG island	SEC1P	48	5	3
tumor	5_1286516	5_676317	0.111919	3.04336	0.00360944	0.435346	TPPP	no CpG island	CTD-2589H19.6	7	29	20
tumor	5_1286516	5_676317	0.111919	3.04336	0.00360944	0.435346	CTD-2589H19.6	no CpG island	CTD-2589H19.6	7	29	20
tumor	11_225196	11_978026	-0.0328456	-3.04261	0.00361715	0.435346	AP2A2	no CpG island	no promoter	48	8	0
tumor	19_49267882	19_48866619	0.0240736	3.04217	0.00362162	0.435346	TMEM143	known CpG island	SYNGR4	48	5	3
tumor	9_802228	9_970138	0.135634	3.042	0.00362335	0.435346	no gene	known CpG island	no promoter	7	27	22
tumor	5_1288547	5_1108557	0.0739904	3.04197	0.00362372	0.435346	SLC12A7	no CpG island	no promoter	2	17	37
tumor	5_1286516	5_1073470	-0.0752479	-3.04185	0.00362487	0.435346	SLC12A7	no CpG island	no promoter	7	29	20
normal	6_152543949	6_151711201	0.0235274	3.57909	0.00109152	0.435554	ZBTB2	known CpG island	no promoter	21	13	1
tumor	5_1283755	5_500521	0.117	3.04094	0.00363427	0.436056	SLC9A3	known CpG island	no promoter	36	17	3
tumor	11_225196	11_1010194	0.104874	3.04059	0.00363787	0.436056	AP2A2	no CpG island	no promoter	48	8	0
tumor	3_128122820	3_128564918	0.0396947	3.03926	0.00365157	0.436056	no gene	known CpG island	no promoter	35	16	5
tumor	2_11721535	2_11780484	-0.136828	-3.03889	0.00365537	0.436056	GREB1	no CpG island	no promoter	25	23	8
tumor	5_176450837	5_176693794	-0.107241	-3.03866	0.00365774	0.436056	NSD1	no CpG island	no promoter	4	40	12
tumor	2_11702661	2_10953115	-0.0255564	-3.03859	0.00365849	0.436056	PDIA6	known CpG island	no promoter	12	18	26
tumor	9_876418	9_973207	-0.103029	-3.03827	0.00366178	0.436056	no gene	known CpG island	no promoter	33	17	6
tumor	X_131626317	X_132231554	-0.157425	-3.03784	0.00366629	0.436056	no gene	no CpG island	no promoter	35	21	0
tumor	12_46798900	12_46865396	-0.0982185	-3.03778	0.00366687	0.436056	no gene	no CpG island	no promoter	16	28	12
tumor	11_35085453	11_34379705	0.0175338	3.03673	0.0036778	0.436056	no gene	known CpG island	no promoter	19	21	16
tumor	11_35085453	11_34936749	0.0856222	3.03666	0.00367849	0.436056	APIP	no CpG island	PDHX	19	21	16
tumor	19_22652436	19_21933704	-0.0302666	-3.03597	0.0036857	0.436056	ZNF100	known CpG island	RP11-420K14.6	37	15	4
tumor	19_22652436	19_21933704	-0.0302666	-3.03597	0.0036857	0.436056	RP11-420K14.6	known CpG island	RP11-420K14.6	37	15	4
tumor	5_1283755	5_431196	0.0241157	3.0359	0.00368642	0.436056	AHRR	no CpG island	no promoter	36	17	3
tumor	5_1286516	5_342238	0.0589032	3.03568	0.00368871	0.436056	PDCD6	no CpG island	no promoter	7	29	20
tumor	5_1286516	5_342238	0.0589032	3.03568	0.00368871	0.436056	AHRR	no CpG island	no promoter	7	29	20
tumor	9_815682	9_969804	0.120113	3.03559	0.00368964	0.436056	no gene	known CpG island	no promoter	30	20	6
tumor	X_70149078	X_70128022	0.0791034	3.03514	0.0036943	0.436056	TEX11	no CpG island	no promoter	21	26	9
tumor	X_70149078	X_69282425	-0.0747203	-3.03508	0.00369496	0.436056	OTUD6A	known CpG island	OTUD6A	21	26	9
tumor	5_1283755	5_1054321	0.0809244	3.03489	0.00369694	0.436056	SLC12A7	no CpG island	no promoter	36	17	3
tumor	9_802228	9_972622	0.132759	3.03485	0.00369735	0.436056	no gene	known CpG island	no promoter	7	27	22
tumor	5_1283755	5_1085537	-0.0342185	-3.03482	0.00369769	0.436056	SLC12A7	known CpG island	no promoter	36	17	3
tumor	5_1288547	5_1020670	0.106957	3.03453	0.00370074	0.436056	NKD2	no CpG island	no promoter	2	17	37
tumor	1_22507684	1_22307567	0.0546535	3.03435	0.00370259	0.436056	CELA3B	no CpG island	no promoter	32	24	0
tumor	11_32459923	11_33081126	-0.056199	-3.03425	0.00370361	0.436056	TCP11L1	no CpG island	no promoter	32	24	0
tumor	5_176450837	5_176739783	0.115594	3.03343	0.0037122	0.436056	no gene	no CpG island	no promoter	4	40	12
tumor	9_876418	9_707022	0.0149107	3.03325	0.00371409	0.436056	KANK1	known CpG island	no promoter	33	17	6
tumor	6_152684585	6_152960380	-0.0346646	-3.03307	0.00371597	0.436056	no gene	no CpG island	no promoter	28	25	3
tumor	5_1286516	5_434915	-0.0558889	-3.0327	0.00371989	0.436056	AHRR	no CpG island	no promoter	7	29	20
tumor	12_46831129	12_47224913	-0.0442111	-3.03225	0.00372459	0.436056	SLC38A4	known CpG island	no promoter	11	22	23
tumor	6_152562271	6_153323604	0.0204764	3.03201	0.00372714	0.436056	MTRF1L	known CpG island	no promoter	34	20	2
tumor	19_49267882	19_48824105	-0.131021	-3.0318	0.00372934	0.436056	CCDC114	no CpG island	EMP3	48	5	3
tumor	11_35085453	11_34265390	0.0892763	3.03178	0.00372956	0.436056	ABTB2	no CpG island	no promoter	19	21	16
tumor	9_815682	9_970211	0.110615	3.03176	0.00372975	0.436056	no gene	known CpG island	no promoter	30	20	6
tumor	19_49267882	19_49404094	0.0602376	3.03104	0.00373744	0.436593	NUCB1	no CpG island	NUCB1	48	5	3
tumor	11_225196	11_945225	-0.209494	-3.03027	0.00374554	0.436639	AP2A2	no CpG island	no promoter	48	8	0
tumor	6_152684585	6_152958393	0.0164661	3.03017	0.00374656	0.436639	SYNE1	known CpG island	no promoter	28	25	3
tumor	11_35085453	11_35160660	0.0186459	3.03012	0.00374713	0.436639	CD44	known CpG island	CD44	19	21	16
tumor	19_49267882	19_50169550	0.0424335	3.02978	0.00375067	0.436691	BCL2L12	no CpG island	BCL2L12	48	5	3
tumor	5_1286516	5_601153	-0.0716578	-3.02887	0.00376033	0.437193	no gene	no CpG island	no promoter	7	29	20
tumor	22_40669648	22_39785091	0.0795199	3.02774	0.0037724	0.437193	no gene	known CpG island	no promoter	27	25	4
tumor	5_176450837	5_176270957	0.108345	3.0277	0.00377276	0.437193	UNC5A	no CpG island	no promoter	4	40	12
tumor	11_108354102	11_108844222	0.0499735	3.02752	0.00377467	0.437193	no gene	no CpG island	no promoter	19	28	9
tumor	9_815682	9_968090	0.145138	3.02752	0.00377477	0.437193	DMRT1	no CpG island	no promoter	30	20	6
tumor	1_22450487	1_22233984	0.145304	3.02721	0.00377806	0.437193	HSPG2	no CpG island	RP11-26H16.1	40	15	1
tumor	19_49267882	19_48282609	0.0289373	3.02704	0.00377983	0.437193	SEPW1	no CpG island	SEPW1	48	5	3
tumor	5_1288547	5_844531	0.0825436	3.02694	0.00378085	0.437193	ZDHHC11	no CpG island	no promoter	2	17	37
tumor	X_131312089	X_130779951	0.114238	3.02675	0.00378289	0.437193	no gene	no CpG island	HDGFP1	21	32	3
tumor	6_152684585	6_152125995	-0.119552	-3.02525	0.00379894	0.437905	ESR1	no CpG island	no promoter	28	25	3
tumor	1_22450487	1_21645238	0.0679896	3.02493	0.00380243	0.437905	ECE1	no CpG island	no promoter	40	15	1
tumor	3_169514585	3_169378875	0.0872543	3.02487	0.003803	0.437905	MECOM	no CpG island	no promoter	25	23	8
tumor	11_225196	11_770410	-0.092594	-3.02478	0.00380406	0.437905	PDDC1	no CpG island	no promoter	48	8	0
tumor	5_1283755	5_1207306	0.169797	3.02473	0.00380457	0.437905	SLC6A19	known CpG island	no promoter	36	17	3
tumor	X_70149078	X_69353387	0.0850997	3.02352	0.00381754	0.438426	IGBP1	known CpG island	IGBP1	21	26	9
tumor	X_131626317	X_132543844	0.142614	3.02312	0.00382187	0.438426	GPC4	no CpG island	no promoter	35	21	0
tumor	9_876418	9_970307	-0.132772	-3.02292	0.00382402	0.438426	no gene	known CpG island	no promoter	33	17	6
tumor	9_815682	9_970882	0.142351	3.02233	0.00383034	0.438426	no gene	known CpG island	no promoter	30	20	6
tumor	9_876418	9_975443	-0.144705	-3.0223	0.00383069	0.438426	no gene	no CpG island	DMRT3	33	17	6
tumor	9_815682	9_973832	0.137082	3.02205	0.00383336	0.438426	no gene	no CpG island	no promoter	30	20	6
tumor	X_131312089	X_132096100	0.076316	3.0218	0.00383615	0.438426	no gene	no CpG island	no promoter	21	32	3
tumor	5_176450837	5_176857723	0.107366	3.02166	0.00383759	0.438426	GRK6	no CpG island	no promoter	4	40	12
tumor	11_35085453	11_34097909	0.0228238	3.02149	0.00383946	0.438426	CAPRIN1	no CpG island	no promoter	19	21	16
tumor	11_35085453	11_35684709	0.0184986	3.02126	0.00384193	0.438426	TRIM44	known CpG island	TRIM44	19	21	16
tumor	10_105674854	10_106401479	-0.0142223	-3.02114	0.00384331	0.438426	SORCS3	known CpG island	SORCS3	8	10	38
tumor	9_876418	9_968118	-0.131776	-3.02036	0.00385172	0.43903	DMRT1	no CpG island	no promoter	33	17	6
tumor	11_32370380	11_31843970	-0.0549693	-3.01975	0.00385838	0.439127	RCN1	no CpG island	no promoter	48	8	0
tumor	22_40669648	22_39928471	0.0136549	3.01971	0.0038588	0.439127	RPS19BP1	known CpG island	no promoter	27	25	4
tumor	2_11702661	2_11605831	-0.0187255	-3.01906	0.00386582	0.43942	E2F6	known CpG island	no promoter	12	18	26
tumor	2_11702661	2_11605831	-0.0187255	-3.01906	0.00386582	0.43942	AC099344.1	known CpG island	no promoter	12	18	26
tumor	6_152562271	6_152502079	0.141859	3.0189	0.0038676	0.43942	SYNE1	no CpG island	no promoter	34	20	2
tumor	1_22507684	1_22919868	0.24281	3.0185	0.00387195	0.439559	EPHA8	known CpG island	no promoter	32	24	0
tumor	11_32459923	11_31838525	0.109416	3.01809	0.00387647	0.439719	PAX6	known CpG island	no promoter	32	24	0
tumor	11_32459923	11_31838525	0.109416	3.01809	0.00387647	0.439719	RCN1	known CpG island	no promoter	32	24	0
tumor	11_35085453	11_34393106	0.0357346	3.01779	0.00387968	0.439729	no gene	no CpG island	no promoter	19	21	16
tumor	X_70022420	X_70503908	0.0893324	3.017	0.00388835	0.440293	NONO	known CpG island	NONO	7	27	22
tumor	6_152684585	6_153630211	-0.150798	-3.01677	0.0038909	0.440293	AL590867.1	no CpG island	no promoter	28	25	3
tumor	10_105674854	10_104855216	0.0918854	3.01574	0.00390214	0.441211	NT5C2	no CpG island	no promoter	8	10	38
tumor	19_22652436	19_23386784	0.0793713	3.01537	0.0039063	0.441267	no gene	known CpG island	RP11-15H20.2	37	15	4
tumor	13_41179798	13_40746453	-0.115064	-3.01489	0.00391152	0.441267	no gene	known CpG island	no promoter	28	23	5
tumor	11_32368744	11_32010377	-0.0318992	-3.01485	0.00391202	0.441267	RCN1	no CpG island	no promoter	16	34	6
normal	9_684160	9_970112	0.159601	3.57234	0.00111197	0.441406	no gene	known CpG island	no promoter	21	10	4
normal	11_225196	11_909193	-0.0778285	-3.57228	0.00111213	0.441406	CHID1	no CpG island	no promoter	30	5	0
tumor	9_826585	9_974162	0.123331	3.01428	0.0039182	0.44161	no gene	no CpG island	no promoter	9	25	22
tumor	X_70149078	X_69665302	0.138311	3.01381	0.00392347	0.441851	DLG3	known CpG island	DLG3	21	26	9
tumor	5_1288547	5_2094288	-0.154471	-3.01312	0.00393103	0.442349	no gene	no CpG island	no promoter	2	17	37
tumor	5_176450837	5_176830555	0.0316793	3.01284	0.00393421	0.442354	F12	known CpG island	GRK6	4	40	12
tumor	5_176450837	5_176830555	0.0316793	3.01284	0.00393421	0.442354	GRK6	known CpG island	GRK6	4	40	12
tumor	6_152543949	6_152623127	0.0326696	3.01187	0.00394491	0.442752	SYNE1	no CpG island	no promoter	24	30	2
tumor	19_49267882	19_49469146	0.024817	3.01168	0.00394699	0.442752	FTL	known CpG island	FTL	48	5	3
tumor	5_1283755	5_2141631	0.130315	3.01164	0.00394748	0.442752	no gene	no CpG island	no promoter	36	17	3
tumor	6_152562271	6_153476415	-0.11947	-3.01073	0.00395758	0.442752	no gene	no CpG island	no promoter	34	20	2
tumor	9_684160	9_1048779	0.0873667	3.01069	0.00395801	0.442752	no gene	no CpG island	DMRT2	28	17	11
tumor	9_802228	9_972865	0.140537	3.01061	0.00395894	0.442752	no gene	known CpG island	no promoter	7	27	22
tumor	11_225196	11_207914	0.0259357	3.01054	0.00395973	0.442752	RIC8A	known CpG island	RIC8A	48	8	0
tumor	2_67090367	2_67624799	0.0373452	3.01019	0.00396357	0.44283	ETAA1	known CpG island	ETAA1	50	6	0
tumor	5_1288547	5_914412	-0.0206539	-3.00927	0.00397392	0.44295	TRIP13	no CpG island	no promoter	2	17	37
tumor	5_176450837	5_175793460	0.168804	3.00915	0.00397517	0.44295	ARL10	known CpG island	ARL10	4	40	12
tumor	5_176450837	5_175793460	0.168804	3.00915	0.00397517	0.44295	ARL10	known CpG island	MIR1271	4	40	12
tumor	12_46831129	12_46767943	0.0862679	3.00834	0.00398427	0.44295	no gene	no CpG island	no promoter	11	22	23
tumor	9_802228	9_974162	0.130303	3.00825	0.00398529	0.44295	no gene	no CpG island	no promoter	7	27	22
tumor	1_22450487	1_21766406	0.0269455	3.00797	0.0039884	0.44295	no gene	known CpG island	NBPF3	40	15	1
tumor	9_815682	9_469799	-0.0715604	-3.00788	0.00398947	0.44295	RP11-165F24.3	no CpG island	KANK1	30	20	6
tumor	11_35085453	11_35442084	0.0915404	3.00759	0.0039927	0.44295	RP4-683L5.1	no CpG island	no promoter	19	21	16
tumor	11_32370380	11_31442990	-0.148166	-3.00736	0.0039953	0.44295	DNAJC24	no CpG island	no promoter	48	8	0
tumor	5_1288547	5_1856386	0.138767	3.00733	0.00399558	0.44295	CTD-2194D22.2	no CpG island	no promoter	2	17	37
tumor	5_1288547	5_759512	-0.177262	-3.00728	0.00399616	0.44295	ZDHHC11	no CpG island	no promoter	2	17	37
tumor	5_1288547	5_759512	-0.177262	-3.00728	0.00399616	0.44295	ZDHHC11B	no CpG island	no promoter	2	17	37
tumor	1_22450487	1_21652402	0.177129	3.00701	0.0039992	0.44295	ECE1	no CpG island	no promoter	40	15	1
tumor	9_815682	9_970993	0.108876	3.00572	0.0040137	0.442995	no gene	known CpG island	no promoter	30	20	6
tumor	5_176450837	5_177376601	0.0338081	3.0056	0.00401516	0.442995	RP11-423H2.1	no CpG island	RP11-423H2.3	4	40	12
tumor	5_176450837	5_177376601	0.0338081	3.0056	0.00401516	0.442995	RP11-1252I4.2	no CpG island	RP11-423H2.3	4	40	12
tumor	11_108354102	11_108338960	0.0887131	3.00559	0.00401521	0.442995	no gene	no CpG island	no promoter	19	28	9
tumor	11_35085453	11_34378230	0.10746	3.00559	0.00401524	0.442995	ABTB2	known CpG island	no promoter	19	21	16
tumor	5_1288547	5_472688	-0.0194099	-3.00531	0.00401835	0.442995	CTD-2228K2.5	known CpG island	CTD-2228K2.7	2	17	37
tumor	11_35085453	11_34533861	-0.107884	-3.0053	0.00401846	0.442995	ELF5	no CpG island	no promoter	19	21	16
tumor	5_1286516	5_887331	-0.0814009	-3.00449	0.00402767	0.443474	BRD9	no CpG island	no promoter	7	29	20
tumor	9_815682	9_973236	0.138967	3.00414	0.00403159	0.443474	no gene	known CpG island	no promoter	30	20	6
tumor	19_22652436	19_23598404	0.0306004	3.00383	0.00403514	0.443474	CTB-175P5.4	no CpG island	no promoter	37	15	4
tumor	9_876418	9_470001	0.0204495	3.00379	0.00403553	0.443474	RP11-165F24.3	no CpG island	KANK1	33	17	6
tumor	12_46798900	12_47219721	-0.0956651	-3.00341	0.00403988	0.443474	SLC38A4	no CpG island	no promoter	16	28	12
tumor	5_1283755	5_1218023	0.0900292	3.00312	0.00404313	0.443474	SLC6A19	no CpG island	no promoter	36	17	3
tumor	11_108168995	11_107436500	0.00876952	3.00298	0.00404482	0.443474	no gene	no CpG island	no promoter	34	20	2
tumor	5_1288547	5_1857430	0.19816	3.00225	0.00405303	0.444029	no gene	known CpG island	no promoter	2	17	37
normal	5_1288547	5_1092999	0.0619181	3.56816	0.0011248	0.444243	SLC12A7	no CpG island	no promoter	2	13	20
normal	5_1286516	5_478213	-0.166939	-3.56797	0.00112537	0.444243	CTD-2228K2.7	no CpG island	no promoter	6	22	7
normal	5_1286516	5_478213	-0.166939	-3.56797	0.00112537	0.444243	SLC9A3	no CpG island	no promoter	6	22	7
normal	5_1283755	5_2129118	-0.126121	-3.56634	0.00113044	0.444243	no gene	no CpG island	no promoter	18	14	3
normal	11_32370380	11_32012497	-0.0513744	-3.56608	0.00113125	0.444243	RCN1	no CpG island	no promoter	30	5	0
tumor	9_876418	9_969826	-0.129798	-3.00113	0.00406589	0.44497	no gene	known CpG island	no promoter	33	17	6
tumor	19_49267882	19_49891588	-0.149706	-3.00095	0.00406794	0.44497	CCDC155	known CpG island	CCDC155	48	5	3
tumor	11_225196	11_457665	0.135544	3.0004	0.00407421	0.445059	PTDSS2	no CpG island	no promoter	48	8	0
tumor	3_128122820	3_127267135	0.0618582	3.00008	0.00407791	0.445059	no gene	no CpG island	no promoter	35	16	5
tumor	3_169514585	3_169486778	-0.076282	-3.00005	0.00407821	0.445059	ACTRT3	no CpG island	RP11-816J6.3	25	23	8
tumor	9_815682	9_970596	0.134917	2.99936	0.00408605	0.445445	no gene	known CpG island	no promoter	30	20	6
tumor	12_46798900	12_46660893	-0.0461543	-2.99856	0.00409524	0.445445	SLC38A1	no CpG island	no promoter	16	28	12
tumor	13_41179798	13_41768181	0.106614	2.99848	0.0040962	0.445445	KBTBD7	known CpG island	no promoter	28	23	5
tumor	9_684160	9_1048967	0.108028	2.99843	0.00409682	0.445445	no gene	no CpG island	DMRT2	28	17	11
tumor	5_1283755	5_2137304	0.129878	2.9983	0.00409832	0.445445	no gene	known CpG island	no promoter	36	17	3
tumor	9_815682	9_975153	0.11048	2.99809	0.00410071	0.445445	no gene	no CpG island	DMRT3	30	20	6
normal	2_11702661	2_11487906	0.0246199	3.56374	0.00113853	0.445728	ROCK2	no CpG island	no promoter	6	11	18
normal	2_11721535	2_11752918	0.220861	3.56199	0.001144	0.445728	GREB1	no CpG island	no promoter	14	15	6
normal	19_49267882	19_49298895	0.0384441	3.56132	0.00114611	0.445728	BCAT2	no CpG island	no promoter	32	2	1
normal	11_107999907	11_107047494	-0.0357564	-3.56024	0.00114953	0.445728	RP11-382M14.1	no CpG island	RP11-382M14.1	31	4	0
normal	9_684160	9_969804	0.0495383	3.55967	0.00115131	0.445728	no gene	known CpG island	no promoter	21	10	4
normal	19_49267882	19_48863571	-0.103078	-3.55739	0.00115852	0.445728	TMEM143	no CpG island	no promoter	32	2	1
normal	5_1283755	5_1170930	0.0796431	3.55734	0.00115868	0.445728	no gene	known CpG island	no promoter	18	14	3
normal	9_684160	9_970596	0.101516	3.55723	0.00115905	0.445728	no gene	known CpG island	no promoter	21	10	4
tumor	5_1286516	5_467152	-0.083322	-2.99744	0.00410815	0.44591	EXOC3	no CpG island	no promoter	7	29	20
tumor	5_1286516	5_467152	-0.083322	-2.99744	0.00410815	0.44591	CTD-2228K2.5	no CpG island	no promoter	7	29	20
tumor	5_1283755	5_1277474	0.15845	2.99674	0.00411623	0.446443	TERT	known CpG island	no promoter	36	17	3
tumor	6_152562271	6_151562923	-0.162945	-2.99623	0.00412211	0.446568	AKAP12	no CpG island	no promoter	34	20	2
tumor	3_169514585	3_169376618	0.086398	2.99541	0.00413162	0.446568	MECOM	no CpG island	no promoter	25	23	8
tumor	10_105674854	10_105218786	-0.116513	-2.9954	0.0041318	0.446568	RP11-225H22.4	no CpG island	no promoter	8	10	38
tumor	5_1288547	5_1877551	0.149766	2.99538	0.00413199	0.446568	IRX4	known CpG island	no promoter	2	17	37
tumor	6_152562271	6_152489702	-0.143331	-2.99476	0.0041392	0.446568	SYNE1	no CpG island	no promoter	34	20	2
tumor	19_49267882	19_50143625	0.0214742	2.9947	0.00413988	0.446568	no gene	known CpG island	SCAF1	48	5	3
tumor	9_876418	9_457309	0.0153229	2.99461	0.00414088	0.446568	DOCK8	no CpG island	no promoter	33	17	6
tumor	9_876418	9_457309	0.0153229	2.99461	0.00414088	0.446568	RP11-165F24.3	no CpG island	no promoter	33	17	6
tumor	11_108168995	11_107992477	0.0122744	2.99393	0.00414881	0.446568	ACAT1	known CpG island	ACAT1	34	20	2
tumor	5_1288547	5_1266569	0.0973912	2.99357	0.00415303	0.446568	TERT	no CpG island	no promoter	2	17	37
tumor	5_1283755	5_2007007	-0.131273	-2.99352	0.00415363	0.446568	no gene	no CpG island	no promoter	36	17	3
tumor	5_1288547	5_716799	-0.192929	-2.99326	0.0041566	0.446568	ZDHHC11	no CpG island	no promoter	2	17	37
tumor	5_1288547	5_716799	-0.192929	-2.99326	0.0041566	0.446568	ZDHHC11B	no CpG island	no promoter	2	17	37
tumor	5_1286516	5_1702558	0.169363	2.99302	0.00415943	0.446568	no gene	known CpG island	no promoter	7	29	20
tumor	1_22507684	1_21934858	0.185077	2.99268	0.00416336	0.446568	RAP1GAP	no CpG island	no promoter	32	24	0
tumor	9_876418	9_969804	-0.118039	-2.9925	0.00416549	0.446568	no gene	known CpG island	no promoter	33	17	6
tumor	5_176450837	5_177411675	0.0360026	2.99216	0.00416944	0.446568	no gene	known CpG island	no promoter	4	40	12
tumor	9_876418	9_971046	-0.104598	-2.99202	0.00417107	0.446568	no gene	known CpG island	no promoter	33	17	6
tumor	13_41179798	13_40924842	0.137079	2.992	0.00417131	0.446568	no gene	no CpG island	no promoter	28	23	5
tumor	11_108354102	11_108370614	0.126162	2.99174	0.00417439	0.446568	no gene	no CpG island	no promoter	19	28	9
tumor	16_51481596	16_50977814	0.197318	2.99127	0.00417995	0.446823	no gene	no CpG island	no promoter	46	9	1
tumor	11_225196	11_430018	0.227013	2.99061	0.00418765	0.447308	ANO9	no CpG island	no promoter	48	8	0
normal	5_1283755	5_1855991	-0.0907141	-3.55466	0.00116725	0.44772	no gene	no CpG island	no promoter	18	14	3
tumor	X_70149078	X_70754007	0.101987	2.98975	0.00419774	0.447828	OGT	no CpG island	no promoter	21	26	9
tumor	9_815682	9_974099	0.118037	2.98965	0.00419887	0.447828	no gene	no CpG island	no promoter	30	20	6
tumor	11_32370380	11_31808843	-0.17608	-2.98898	0.00420683	0.448338	PAX6	no CpG island	no promoter	48	8	0
tumor	6_152562271	6_153452320	0.0221774	2.9887	0.00421011	0.448348	RGS17	known CpG island	no promoter	34	20	2
normal	19_49267882	19_49176921	-0.27766	-3.55312	0.00117219	0.448456	SEC1P	no CpG island	no promoter	32	2	1
tumor	5_1286516	5_1552259	0.0218135	2.98742	0.00422519	0.449125	no gene	no CpG island	no promoter	7	29	20
tumor	6_152684585	6_152958624	-0.104513	-2.9871	0.00422903	0.449125	SYNE1	no CpG island	no promoter	28	25	3
tumor	22_40669648	22_40296767	0.0514838	2.98683	0.00423221	0.449125	no gene	no CpG island	GRAP2	27	25	4
tumor	5_176450837	5_177019067	-0.0164919	-2.98678	0.00423286	0.449125	no gene	known CpG island	TMED9	4	40	12
tumor	X_131312089	X_131547767	-0.149662	-2.9857	0.00424568	0.449125	RAP2C-AS1	no CpG island	no promoter	21	32	3
tumor	X_131312089	X_131547767	-0.149662	-2.9857	0.00424568	0.449125	MBNL3	no CpG island	no promoter	21	32	3
tumor	10_105674854	10_105836763	-0.0976037	-2.9856	0.00424688	0.449125	COL17A1	no CpG island	no promoter	8	10	38
tumor	5_1283755	5_1430434	-0.0457383	-2.98558	0.00424703	0.449125	SLC6A3	no CpG island	no promoter	36	17	3
tumor	9_815682	9_973184	0.140907	2.98529	0.00425051	0.449125	no gene	known CpG island	no promoter	30	20	6
tumor	11_225196	11_1156037	0.188622	2.98494	0.00425464	0.449125	MUC5AC	no CpG island	no promoter	48	8	0
tumor	1_22450487	1_21980408	0.167242	2.98494	0.00425473	0.449125	RAP1GAP	no CpG island	no promoter	40	15	1
tumor	5_1286516	5_488487	-0.101346	-2.98446	0.00426046	0.449125	SLC9A3	known CpG island	no promoter	7	29	20
tumor	X_70149078	X_70798047	0.0764522	2.98429	0.00426244	0.449125	no gene	known CpG island	ACRC	21	26	9
tumor	3_169514585	3_168863829	0.0683152	2.984	0.00426595	0.449125	MECOM	no CpG island	no promoter	25	23	8
tumor	X_70093038	X_69487703	-0.127434	-2.9836	0.00427064	0.449125	no gene	no CpG island	ARR3	9	37	10
tumor	5_1283755	5_1216784	-0.0356718	-2.98356	0.00427121	0.449125	SLC6A19	known CpG island	no promoter	36	17	3
tumor	5_1283755	5_1876347	0.0744236	2.98348	0.00427216	0.449125	no gene	known CpG island	no promoter	36	17	3
tumor	5_1286516	5_1016454	-0.116672	-2.98346	0.00427238	0.449125	NKD2	no CpG island	no promoter	7	29	20
tumor	11_35085453	11_35440062	0.107003	2.98326	0.00427474	0.449125	SLC1A2	no CpG island	RP4-683L5.1	19	21	16
normal	5_1286516	5_2103177	0.0981884	3.55114	0.00117856	0.449736	no gene	no CpG island	no promoter	6	22	7
tumor	5_1283755	5_2206865	-0.138463	-2.98193	0.00429065	0.450063	no gene	no CpG island	no promoter	36	17	3
tumor	9_802228	9_970122	0.14484	2.98173	0.00429303	0.450063	no gene	known CpG island	no promoter	7	27	22
tumor	6_152684585	6_153280995	-0.147694	-2.98159	0.00429474	0.450063	no gene	no CpG island	no promoter	28	25	3
tumor	19_49267882	19_48918195	-0.167335	-2.98137	0.00429741	0.450063	GRIN2D	known CpG island	no promoter	48	5	3
tumor	5_1288547	5_1431086	0.0952157	2.98119	0.00429963	0.450063	SLC6A3	no CpG island	no promoter	2	17	37
tumor	9_826585	9_973184	0.134895	2.98062	0.00430649	0.450447	no gene	known CpG island	no promoter	9	25	22
tumor	9_815682	9_969611	0.133139	2.97989	0.0043152	0.451023	no gene	known CpG island	no promoter	30	20	6
tumor	5_1288547	5_870759	-0.0657685	-2.97953	0.0043196	0.451148	BRD9	no CpG island	no promoter	2	17	37
normal	X_70093038	X_69671827	0.154334	3.54758	0.00119012	0.451512	DLG3	no CpG island	no promoter	7	21	7
normal	5_1288547	5_1110179	0.0464555	3.54674	0.00119287	0.451512	SLC12A7	no CpG island	no promoter	2	13	20
normal	19_49267882	19_49588672	0.0845402	3.54613	0.00119484	0.451512	no gene	known CpG island	SNRNP70	32	2	1
normal	5_1286516	5_534285	0.156922	3.54597	0.00119539	0.451512	no gene	no CpG island	no promoter	6	22	7
tumor	10_105674854	10_105619746	-0.03577	-2.97839	0.00433342	0.452173	no gene	no CpG island	no promoter	8	10	38
tumor	9_815682	9_972889	0.0394505	2.97819	0.00433582	0.452173	no gene	known CpG island	no promoter	30	20	6
tumor	9_684160	9_686433	-0.0525451	-2.97771	0.00434167	0.452448	KANK1	no CpG island	no promoter	28	17	11
tumor	9_815682	9_972964	0.135133	2.97735	0.00434594	0.452559	no gene	known CpG island	no promoter	30	20	6
tumor	5_1286516	5_1097445	-0.192524	-2.97697	0.00435059	0.452653	SLC12A7	no CpG island	no promoter	7	29	20
tumor	11_225196	11_518717	0.0219494	2.97675	0.00435326	0.452653	no gene	known CpG island	no promoter	48	8	0
tumor	9_876418	9_968087	-0.133302	-2.9762	0.00435998	0.452943	DMRT1	no CpG island	no promoter	33	17	6
tumor	6_152543949	6_152957171	-0.0250059	-2.97569	0.00436615	0.452943	SYNE1	no CpG island	no promoter	24	30	2
tumor	9_815682	9_971008	0.120938	2.97554	0.00436801	0.452943	no gene	known CpG island	no promoter	30	20	6
tumor	19_49267882	19_49469150	0.0141683	2.97523	0.00437178	0.452943	FTL	known CpG island	FTL	48	5	3
tumor	5_1283755	5_462156	-0.0231161	-2.97521	0.00437212	0.452943	EXOC3	no CpG island	no promoter	36	17	3
tumor	5_1286516	5_1809703	0.0233086	2.97435	0.00438262	0.453378	NDUFS6	no CpG island	no promoter	7	29	20
tumor	5_1288547	5_1644601	-0.118348	-2.97434	0.00438274	0.453378	no gene	no CpG island	no promoter	2	17	37
tumor	11_225196	11_925539	0.234528	2.97317	0.00439706	0.454194	AP2A2	known CpG island	AP2A2	48	8	0
tumor	19_49267882	19_50083906	0.0213124	2.97273	0.00440251	0.454194	NOSIP	known CpG island	PRRG2	48	5	3
tumor	19_49267882	19_50083906	0.0213124	2.97273	0.00440251	0.454194	PRRG2	known CpG island	PRRG2	48	5	3
tumor	19_49267882	19_48867420	0.0105795	2.9727	0.00440284	0.454194	TMEM143	known CpG island	SYNGR4	48	5	3
tumor	1_22450487	1_22871251	-0.0475821	-2.97214	0.00440976	0.454194	no gene	no CpG island	no promoter	40	15	1
tumor	3_169514585	3_169377979	-0.069498	-2.97141	0.00441878	0.454194	MECOM	no CpG island	no promoter	25	23	8
tumor	12_46798900	12_47219705	-0.0906521	-2.97103	0.00442343	0.454194	SLC38A4	no CpG island	no promoter	16	28	12
tumor	9_876418	9_1048965	-0.124773	-2.9709	0.00442499	0.454194	no gene	no CpG island	DMRT2	33	17	6
tumor	1_22450487	1_21994865	-0.157076	-2.97065	0.00442806	0.454194	RAP1GAP	no CpG island	no promoter	40	15	1
tumor	X_70149078	X_70150989	0.0840268	2.97006	0.00443548	0.454194	no gene	known CpG island	no promoter	21	26	9
tumor	22_40669648	22_39850128	-0.16061	-2.96998	0.0044364	0.454194	no gene	no CpG island	no promoter	27	25	4
tumor	9_802228	9_975282	0.143534	2.96966	0.00444042	0.454194	no gene	no CpG island	DMRT3	7	27	22
tumor	22_40669648	22_40695923	-0.127446	-2.96925	0.00444551	0.454194	TNRC6B	no CpG island	no promoter	27	25	4
tumor	9_876418	9_970581	-0.117944	-2.96912	0.00444708	0.454194	no gene	known CpG island	no promoter	33	17	6
tumor	9_802228	9_973207	0.103005	2.96869	0.00445243	0.454194	no gene	known CpG island	no promoter	7	27	22
tumor	11_108354102	11_108534769	0.0917785	2.96854	0.00445429	0.454194	no gene	no CpG island	DDX10	19	28	9
tumor	11_108354102	11_107711846	0.132157	2.96818	0.00445881	0.454194	SLC35F2	no CpG island	no promoter	19	28	9
tumor	5_1288547	5_1224359	0.0737501	2.96785	0.00446283	0.454194	SLC6A19	no CpG island	SLC6A18	2	17	37
tumor	9_826585	9_469777	-0.110782	-2.96758	0.00446623	0.454194	RP11-165F24.3	no CpG island	KANK1	9	25	22
tumor	11_32459923	11_32851277	-0.0182893	-2.96748	0.00446744	0.454194	no gene	known CpG island	PRRG4	32	24	0
tumor	13_41179798	13_41238177	0.0403794	2.96685	0.00447532	0.454194	FOXO1	no CpG island	no promoter	28	23	5
tumor	11_225196	11_1078254	0.247129	2.96674	0.00447667	0.454194	MUC2	no CpG island	no promoter	48	8	0
tumor	5_1286516	5_1672178	0.144613	2.96665	0.00447781	0.454194	no gene	no CpG island	no promoter	7	29	20
tumor	9_802228	9_975349	0.12505	2.9664	0.00448092	0.454194	no gene	no CpG island	DMRT3	7	27	22
tumor	11_32368744	11_32421759	0.104167	2.96636	0.00448145	0.454194	WT1	no CpG island	no promoter	16	34	6
tumor	10_105674854	10_105210980	-0.0149804	-2.96613	0.00448439	0.454194	CALHM2	no CpG island	RP11-225H22.4	8	10	38
tumor	11_35085453	11_34378022	0.101255	2.96601	0.00448586	0.454194	ABTB2	no CpG island	no promoter	19	21	16
tumor	5_1288547	5_1380085	-0.134931	-2.966	0.00448591	0.454194	RP11-325I22.2	no CpG island	no promoter	2	17	37
tumor	5_1288547	5_1495196	0.083571	2.96576	0.00448891	0.454194	LPCAT1	known CpG island	no promoter	2	17	37
tumor	5_1288547	5_1879029	0.163681	2.96576	0.00448896	0.454194	IRX4	known CpG island	no promoter	2	17	37
tumor	9_802228	9_975133	0.14145	2.96539	0.00449354	0.454194	no gene	no CpG island	DMRT3	7	27	22
tumor	5_1288547	5_304051	0.187206	2.96534	0.00449426	0.454194	PDCD6	no CpG island	AHRR	2	17	37
tumor	9_876418	9_505149	0.0190155	2.96509	0.00449731	0.454194	KANK1	known CpG island	no promoter	33	17	6
tumor	11_35085453	11_35439809	0.105022	2.96478	0.00450122	0.454194	SLC1A2	no CpG island	RP4-683L5.1	19	21	16
tumor	1_22450487	1_21586961	-0.0881427	-2.96449	0.00450488	0.454194	ECE1	no CpG island	no promoter	40	15	1
tumor	19_49267882	19_49939549	-0.163903	-2.96447	0.00450513	0.454194	SLC17A7	no CpG island	no promoter	48	5	3
tumor	9_802228	9_970511	0.129709	2.96423	0.00450811	0.454194	no gene	known CpG island	no promoter	7	27	22
tumor	22_40669648	22_40052602	0.144274	2.9641	0.00450982	0.454194	CACNA1I	no CpG island	no promoter	27	25	4
tumor	5_1286516	5_510377	-0.107717	-2.96238	0.00453152	0.455458	SLC9A3	no CpG island	no promoter	7	29	20
tumor	5_176450837	5_176172918	-0.131776	-2.96235	0.0045318	0.455458	no gene	no CpG island	no promoter	4	40	12
tumor	6_152684585	6_153476415	-0.111331	-2.96233	0.00453206	0.455458	no gene	no CpG island	no promoter	28	25	3
tumor	11_225196	11_537158	0.256155	2.96186	0.00453811	0.455484	HRAS	known CpG island	LRRC56	48	8	0
tumor	12_46798900	12_46660749	-0.0890256	-2.96128	0.00454545	0.455484	SLC38A1	no CpG island	no promoter	16	28	12
tumor	5_1286516	5_1288540	0.0362871	2.961	0.00454889	0.455484	TERT	no CpG island	no promoter	7	29	20
tumor	11_225196	11_1003310	-0.225069	-2.961	0.00454892	0.455484	AP2A2	no CpG island	no promoter	48	8	0
tumor	11_225196	11_847042	0.141228	2.96078	0.00455167	0.455484	TSPAN4	no CpG island	no promoter	48	8	0
tumor	11_35085453	11_34876740	0.0331452	2.96061	0.00455382	0.455484	APIP	no CpG island	no promoter	19	21	16
tumor	1_22507684	1_21877322	0.146479	2.96044	0.00455599	0.455484	ALPL	no CpG island	no promoter	32	24	0
tumor	5_1286516	5_1108557	0.0610821	2.96027	0.00455816	0.455484	SLC12A7	no CpG island	no promoter	7	29	20
tumor	11_225196	11_826473	-0.13736	-2.95986	0.0045634	0.455684	AP006621.8	no CpG island	EFCAB4A	48	8	0
tumor	11_225196	11_826473	-0.13736	-2.95986	0.0045634	0.455684	EFCAB4A	no CpG island	EFCAB4A	48	8	0
tumor	6_152543949	6_152623081	0.0616416	2.95914	0.00457258	0.456177	SYNE1	no CpG island	no promoter	24	30	2
tumor	5_176450837	5_175965060	-0.028732	-2.95839	0.00458217	0.456177	no gene	known CpG island	no promoter	4	40	12
tumor	2_11721535	2_12454300	-0.054878	-2.95831	0.00458317	0.456177	AC096559.1	no CpG island	no promoter	25	23	8
tumor	11_108354102	11_109294157	0.0202223	2.95823	0.00458417	0.456177	RP11-708B6.2	known CpG island	no promoter	19	28	9
tumor	11_108354102	11_109294157	0.0202223	2.95823	0.00458417	0.456177	C11orf87	known CpG island	no promoter	19	28	9
tumor	3_128122820	3_127899140	-0.112009	-2.9582	0.00458451	0.456177	EEFSEC	no CpG island	no promoter	35	16	5
tumor	X_70149078	X_70755109	-0.118831	-2.95714	0.00459808	0.457205	OGT	no CpG island	no promoter	21	26	9
tumor	3_128122820	3_128568213	0.0606517	2.95581	0.00461513	0.458049	RP11-221E20.4	no CpG island	no promoter	35	16	5
tumor	9_684160	9_842630	0.0893449	2.95573	0.00461627	0.458049	DMRT1	known CpG island	DMRT1	28	17	11
tumor	11_225196	11_837930	-0.138738	-2.95572	0.00461632	0.458049	CD151	no CpG island	no promoter	48	8	0
tumor	11_225196	11_837930	-0.138738	-2.95572	0.00461632	0.458049	POLR2L	no CpG island	no promoter	48	8	0
tumor	5_1286516	5_1702669	0.135004	2.95537	0.00462082	0.458173	no gene	no CpG island	no promoter	7	29	20
tumor	11_32368744	11_32421574	0.0529039	2.95449	0.00463216	0.458974	WT1	no CpG island	no promoter	16	34	6
tumor	1_22507684	1_22165546	-0.0614461	-2.95421	0.00463573	0.459006	HSPG2	no CpG island	no promoter	32	24	0
tumor	9_684160	9_1010083	-0.0698918	-2.95377	0.0046415	0.459094	no gene	no CpG island	RP11-147I11.1	28	17	11
tumor	9_684160	9_973778	0.12134	2.95324	0.00464837	0.459094	no gene	no CpG island	no promoter	28	17	11
tumor	10_105674854	10_105198564	0.0186783	2.95314	0.00464957	0.459094	PDCD11	no CpG island	no promoter	8	10	38
tumor	10_105674854	10_105420777	0.034673	2.95314	0.00464965	0.459094	SH3PXD2A	known CpG island	no promoter	8	10	38
normal	5_1286516	5_945617	-0.12103	-3.53888	0.00121881	0.459191	no gene	no CpG island	RP11-661C8.2	6	22	7
tumor	9_876418	9_311814	-0.0573668	-2.95229	0.00466065	0.459512	DOCK8	no CpG island	no promoter	33	17	6
tumor	9_802228	9_970864	0.147575	2.95217	0.00466217	0.459512	no gene	known CpG island	no promoter	7	27	22
tumor	5_1283755	5_1882984	0.0195723	2.9506	0.00468253	0.459512	IRX4	known CpG island	CTD-2194D22.3	36	17	3
tumor	5_1288547	5_475766	0.174472	2.95045	0.00468458	0.459512	CTD-2228K2.7	no CpG island	no promoter	2	17	37
tumor	5_1288547	5_475766	0.174472	2.95045	0.00468458	0.459512	SLC9A3	no CpG island	no promoter	2	17	37
tumor	4_70634441	4_71017256	-0.0879936	-2.95031	0.00468641	0.459512	C4orf40	no CpG island	no promoter	29	16	11
tumor	9_802228	9_973257	0.147315	2.95025	0.0046872	0.459512	no gene	known CpG island	no promoter	7	27	22
tumor	3_128122820	3_127973356	-0.0405321	-2.95004	0.0046899	0.459512	EEFSEC	no CpG island	no promoter	35	16	5
tumor	12_46798900	12_47225034	-0.0713087	-2.94999	0.00469051	0.459512	SLC38A4	known CpG island	no promoter	16	28	12
tumor	9_684160	9_990338	-0.0809397	-2.94966	0.00469488	0.459512	DMRT3	no CpG island	no promoter	28	17	11
tumor	19_49267882	19_50040426	-0.11163	-2.94945	0.00469762	0.459512	RCN3	no CpG island	no promoter	48	5	3
tumor	9_815682	9_419398	-0.131382	-2.94915	0.00470151	0.459512	DOCK8	no CpG island	no promoter	30	20	6
tumor	X_70093038	X_69643744	0.13973	2.94913	0.00470178	0.459512	GDPD2	no CpG island	GDPD2	9	37	10
tumor	19_49267882	19_48918140	-0.196851	-2.94912	0.00470193	0.459512	GRIN2D	known CpG island	no promoter	48	5	3
tumor	10_105674854	10_105365707	0.0974793	2.94897	0.00470381	0.459512	SH3PXD2A	no CpG island	no promoter	8	10	38
tumor	9_684160	9_970448	0.127877	2.94879	0.00470618	0.459512	no gene	known CpG island	no promoter	28	17	11
tumor	10_105674854	10_104679512	-0.0980128	-2.94857	0.00470911	0.459512	CNNM2	no CpG island	no promoter	8	10	38
tumor	9_815682	9_974704	0.131049	2.94853	0.00470965	0.459512	no gene	no CpG island	no promoter	30	20	6
tumor	5_1283755	5_1326371	0.119453	2.94831	0.00471255	0.459512	CLPTM1L	no CpG island	no promoter	36	17	3
tumor	1_22450487	1_22665064	-0.036135	-2.94796	0.0047171	0.459639	no gene	no CpG island	no promoter	40	15	1
tumor	11_35085453	11_35547708	0.0404081	2.94636	0.00473811	0.461367	PAMR1	no CpG island	no promoter	19	21	16
tumor	22_40669648	22_41347553	0.00689322	2.94596	0.00474332	0.461405	XPNPEP3	known CpG island	RBX1	27	25	4
tumor	22_40669648	22_41347553	0.00689322	2.94596	0.00474332	0.461405	RBX1	known CpG island	RBX1	27	25	4
tumor	13_41179798	13_41055129	-0.0597908	-2.94583	0.00474505	0.461405	LINC00598	no CpG island	no promoter	28	23	5
tumor	19_22652436	19_23015061	0.183978	2.94543	0.00475042	0.46143	ZNF723	no CpG island	ZNF723	37	15	4
tumor	5_1283755	5_1856774	-0.170609	-2.94509	0.00475485	0.46143	no gene	known CpG island	no promoter	36	17	3
tumor	5_1283755	5_427654	-0.0314889	-2.94507	0.00475512	0.46143	AHRR	no CpG island	no promoter	36	17	3
tumor	6_152593102	6_151733131	-0.00989021	-2.94433	0.00476487	0.461952	RMND1	no CpG island	no promoter	17	31	8
tumor	6_152593102	6_151733131	-0.00989021	-2.94433	0.00476487	0.461952	HSPA8P15	no CpG island	no promoter	17	31	8
tumor	X_131626317	X_132091148	-0.123927	-2.94417	0.00476705	0.461952	HS6ST2	known CpG island	no promoter	35	21	0
tumor	5_1288547	5_945832	-0.159499	-2.94345	0.00477654	0.462189	no gene	no CpG island	RP11-661C8.2	2	17	37
tumor	6_152543949	6_152623159	0.0206361	2.94327	0.00477901	0.462189	SYNE1	no CpG island	no promoter	24	30	2
tumor	10_105674854	10_106014562	-0.0160676	-2.94309	0.00478131	0.462189	GSTO1	no CpG island	no promoter	8	10	38
tumor	5_176450837	5_176692785	0.058196	2.94292	0.00478366	0.462189	NSD1	no CpG island	no promoter	4	40	12
tumor	5_176450837	5_176692785	0.058196	2.94292	0.00478366	0.462189	CTD-2301A4.5	no CpG island	no promoter	4	40	12
tumor	2_11702661	2_11102129	0.0317045	2.94275	0.00478589	0.462189	no gene	no CpG island	no promoter	12	18	26
tumor	X_131578034	X_131524978	0.0872783	2.94152	0.00480227	0.463454	RAP2C-AS1	no CpG island	no promoter	5	21	30
tumor	X_131578034	X_131524978	0.0872783	2.94152	0.00480227	0.463454	MBNL3	no CpG island	no promoter	5	21	30
tumor	6_152562271	6_153323355	0.0164917	2.941	0.00480922	0.46366	MTRF1L	no CpG island	no promoter	34	20	2
tumor	5_1283755	5_1255546	-0.164777	-2.94086	0.00481099	0.46366	TERT	no CpG island	no promoter	36	17	3
tumor	5_1288547	5_308138	0.0806134	2.93902	0.00483566	0.465149	PDCD6	no CpG island	no promoter	2	17	37
tumor	5_1288547	5_308138	0.0806134	2.93902	0.00483566	0.465149	AHRR	no CpG island	no promoter	2	17	37
tumor	5_1283755	5_435367	-0.0313988	-2.93887	0.00483767	0.465149	AHRR	no CpG island	no promoter	36	17	3
[truncated: 16,526 more rows]
