# Supplementary material for: Genetic predisposition to uterine leiomyoma is determined by loci for genitourinary development and genome stability
Source: eLife. 2018 Sep 18;7:e37110. doi: 10.7554/eLife.37110 (PMC6203434; doi:10.7554/eLife.37110)
Supplement: Supplementary file 6. — Includes target gene prioritization, pathway enrichment and tissue-specific expression profiling results from the DEPICT framework (details in the Methods section). [file elife-37110-supp6.xlsx]

## Sheet: Gene prioritization
Locus	Nr of genes in locus	Chromosome and position	UKBB GWAS P value	Ensembl gene ID	Gene symbol	Nominal P value	FDR	Gene closest to lead SNP	Top cis eQTL SNP (Westra et al. Nature Genetics 2014)
rs141379009;rs4988023	7	chr11:107879459-108464465	2e-18	ENSG00000149311	ATM	0.00284	0.126665	false	-
rs141379009;rs4988023	7	chr11:107879459-108464465	2e-18	ENSG00000149308	NPAT	0.00539	0.126665	true	rs623860
rs2456181	3	chr5:176307870-176508190	6.3e-09	ENSG00000087206	UIMC1	0.01	0.156667	false	-
rs141379009;rs4988023	7	chr11:107879459-108464465	2e-18	ENSG00000178202	KDELC2	0.04	0.376	false	rs3741060
rs62323680	2	chr4:54243810-55161439	8.3e-13	ENSG00000145216	FIP1L1	0.04	0.376	false	rs2616422
rs2277163;rs7027685	1	chr9:841690-969090	3.8e-18	ENSG00000137090	DMRT1	0.05	0.391667	true	rs11998969
rs7986407	3	chr13:41129817-41386596	1.2e-11	ENSG00000102738	MRPS31	0.07	0.407333	false	rs3812891
rs2235529	5	chr1:22350487-22470462	1.1e-17	ENSG00000218510	LINC00339	0.07	0.407333	false	-
rs11246003;rs507139	6	chr11:167784-252983	3.2e-13	ENSG00000142082	SIRT3	0.09	0.407333	false	-
rs2456181	3	chr5:176307870-176508190	6.3e-09	ENSG00000113761	ZNF346	0.09	0.407333	true	rs402511
rs2853677;rs72709458	1	chr5:1253262-1295184	6.9e-16	ENSG00000164362	TERT	0.11	0.407333	true	rs2242652;rs6894574
rs7986407	3	chr13:41129817-41386596	1.2e-11	ENSG00000150907	FOXO1	0.12	0.407333	true	-
rs141379009;rs4988023	7	chr11:107879459-108464465	2e-18	ENSG00000166266	CUL5	0.12	0.407333	false	rs12418673
rs7986407	3	chr13:41129817-41386596	1.2e-11	ENSG00000102743	SLC25A15	0.13	0.407333	false	-
rs11246003;rs507139	6	chr11:167784-252983	3.2e-13	ENSG00000177963	RIC8A	0.13	0.407333	true	rs1045454
rs2235529	5	chr1:22350487-22470462	1.1e-17	ENSG00000228397	-	0.14	0.41125	false	-
rs10936600	4	chr3:169484713-169587718	6.4e-12	ENSG00000085274	MYNN	0.15	0.414706	false	rs12631412;rs7652524
rs1265164	2	chr10:105348285-105677963	1e-08	ENSG00000107960	OBFC1	0.16	0.417778	true	-
rs141379009;rs4988023	7	chr11:107879459-108464465	2e-18	ENSG00000166323	C11orf65	0.19	0.47	false	rs4988023
rs10835889;rs932503	1	chr11:32457064-32480315	5.5e-19	ENSG00000183242	WT1-AS	0.22	0.509167	true	rs12277613
rs11246003;rs507139	6	chr11:167784-252983	3.2e-13	ENSG00000185627	PSMD13	0.24	0.509167	true	rs2272566;rs11246074
rs10936600	4	chr3:169484713-169587718	6.4e-12	ENSG00000171757	LRRC34	0.25	0.509167	true	-
rs733381	1	chr22:40440821-40731811	5.7e-11	ENSG00000100354	TNRC6B	0.25	0.509167	false	-
rs10929757	1	chr2:11674242-11782914	1.2e-09	ENSG00000196208	GREB1	0.26	0.509167	true	rs7596162;rs12692445
rs11246003;rs507139	6	chr11:167784-252983	3.2e-13	ENSG00000177947	ODF3	0.3	0.564	false	-
rs141379009;rs4988023	7	chr11:107879459-108464465	2e-18	ENSG00000075239	ACAT1	0.32	0.574444	false	-
rs12230643;rs7485599	3	chr12:46581584-46767561	2.3e-11	ENSG00000134294	SLC38A2	0.33	0.574444	true	rs4768697;rs11829502
rs2235529	5	chr1:22350487-22470462	1.1e-17	ENSG00000230068	CDC42-IT1	0.36	0.579667	false	-
rs138821078;rs73639400	2	chr9:470291-746105	3.1e-12	ENSG00000107104	KANK1	0.36	0.579667	false	rs7861612;rs10815034;rs10974690
rs10936600	4	chr3:169484713-169587718	6.4e-12	ENSG00000184378	-	0.37	0.579667	false	-
rs11246003;rs507139	6	chr11:167784-252983	3.2e-13	ENSG00000177951	BET1L	0.43	0.651935	false	rs11748
rs10936600	4	chr3:169484713-169587718	6.4e-12	ENSG00000114248	LRRC31	0.48	0.705	false	-
rs2235529	5	chr1:22350487-22470462	1.1e-17	ENSG00000162552	WNT4	0.54	0.769091	true	rs6688182
rs2202282	1	chr4:70592566-70653679	8.7e-10	ENSG00000173597	SULT1B1	0.57	0.778857	true	rs12507510
rs117245733	1	chr13:40229764-40365802	4.2e-09	ENSG00000133103	COG6	0.58	0.778857	true	-
rs2456181	3	chr5:176307870-176508190	6.3e-09	ENSG00000160883	HK3	0.7	0.913889	false	rs11739147
rs1265164	2	chr10:105348285-105677963	1e-08	ENSG00000107957	SH3PXD2A	0.73	0.927297	false	rs3824774;rs6584579
rs66998222	1	chr16:51169886-51185181	8.9e-11	ENSG00000103449	SALL1	0.77	0.94	true	-
rs62323680	2	chr4:54243810-55161439	8.3e-13	ENSG00000072201	LNX1	0.78	0.94	true	-
rs138821078;rs73639400	2	chr9:470291-746105	3.1e-12	ENSG00000226403	-	0.83	0.961364	true	-
rs141379009;rs4988023	7	chr11:107879459-108464465	2e-18	ENSG00000110723	EXPH5	0.87	0.961364	false	rs949285
rs11246003;rs507139	6	chr11:167784-252983	3.2e-13	ENSG00000188076	SCGB1C1	0.89	0.961364	false	rs11602954
rs2553772	1	chr11:35160417-35253949	4.4e-09	ENSG00000026508	CD44	0.89	0.961364	true	rs4755409;rs543353;rs1467558
rs12230643;rs7485599	3	chr12:46581584-46767561	2.3e-11	ENSG00000258096	-	0.9	0.961364	false	-
rs1408461;rs58415480;rs6904757	1	chr6:152442819-152958936	6e-29	ENSG00000131018	SYNE1	0.97	0.99	true	rs9397501;rs7739404;rs7766507
rs12230643;rs7485599	3	chr12:46581584-46767561	2.3e-11	ENSG00000111371	SLC38A1	0.97	0.99	false	rs11183389;rs2242355
rs2235529	5	chr1:22350487-22470462	1.1e-17	ENSG00000070831	CDC42	0.99	0.99	false	rs2268177;rs4655032

## Sheet: Gene set enrichment
Original gene set ID	Original gene set description	Nominal P value	FDR	Reconstituted gene set Z score gene 1	Reconstituted gene set Z score gene 2	Reconstituted gene set Z score gene 3	Reconstituted gene set Z score gene 4	Reconstituted gene set Z score gene 5	Reconstituted gene set Z score gene 6	Reconstituted gene set Z score gene 7	Reconstituted gene set Z score gene 8	Reconstituted gene set Z score gene 9	Reconstituted gene set Z score gene 10
MP:0004486	decreased response of heart to induced stress	1.42e-06	0.0155746	KANK1 (2.1)	OBFC1 (2.0)	CDC42-IT1 (2.0)	FOXO1 (2.0)	LRRC31 (1.9)	WT1-AS (1.9)	DMRT1 (1.8)	SULT1B1 (1.6)	SLC38A2 (1.5)	ZNF346 (1.2)
ENSG00000141510	TP53 PPI subnetwork	2.31e-05	0.12668	FIP1L1 (2.6)	SLC38A2 (2.6)	UIMC1 (2.2)	PSMD13 (1.7)	CDC42 (1.6)	CDC42-IT1 (1.5)	TNRC6B (1.4)	OBFC1 (1.2)	TERT (1.2)	FOXO1 (1.1)
GO:0045786	negative regulation of cell cycle	0.000145	0.400332	NPAT (2.7)	PSMD13 (2.2)	KDELC2 (2.1)	MRPS31 (1.9)	RIC8A (1.7)	CUL5 (1.7)	ZNF346 (1.7)	UIMC1 (1.6)	ATM (1.6)	MYNN (1.6)
ENSG00000196981	WDR5B PPI subnetwork	0.000146	0.400332	ZNF346 (3.0)	LINC00339 (2.6)	KDELC2 (2.2)	NPAT (2.1)	DMRT1 (1.9)	OBFC1 (1.9)	RIC8A (1.6)	MRPS31 (1.5)	COG6 (1.2)	ATM (1.0)
ENSG00000116717	GADD45A PPI subnetwork	0.000374	0.820216	MRPS31 (2.0)	UIMC1 (1.5)	BET1L (1.5)	SCGB1C1 (1.5)	WNT4 (1.4)	FOXO1 (1.3)	LNX1 (1.3)	ENSG00000228397 (1.2)	ENSG00000258096 (1.2)	FIP1L1 (1.1)
ENSG00000070950	RAD18 PPI subnetwork	0.000615	0.820216	OBFC1 (3.4)	NPAT (2.9)	MYNN (2.6)	ENSG00000184378 (1.7)	MRPS31 (1.7)	LINC00339 (1.6)	ATM (1.5)	ENSG00000228397 (1.5)	TERT (1.5)	CUL5 (1.4)
ENSG00000147853	AK3 PPI subnetwork	0.000616	0.820216	SALL1 (1.9)	ACAT1 (1.8)	RIC8A (1.5)	SCGB1C1 (1.3)	PSMD13 (1.1)	OBFC1 (1.1)	DMRT1 (1.0)	ODF3 (1.0)	GREB1 (0.9)	LRRC31 (0.9)
MP:0001634	internal hemorrhage	0.000716	0.820216	SCGB1C1 (3.0)	SLC38A2 (2.8)	FIP1L1 (1.8)	TNRC6B (1.8)	MYNN (1.6)	DMRT1 (1.6)	ENSG00000228397 (1.4)	ZNF346 (1.4)	SULT1B1 (1.2)	WT1-AS (1.2)
GO:0001706	endoderm formation	0.000859	0.820216	CDC42-IT1 (2.9)	LINC00339 (2.8)	ENSG00000228397 (2.2)	KANK1 (1.7)	GREB1 (1.7)	WT1-AS (1.6)	OBFC1 (1.6)	SLC38A2 (1.4)	LRRC31 (1.1)	ODF3 (0.9)
MP:0008111	abnormal granulocyte differentiation	0.000976	0.820216	WT1-AS (2.0)	LRRC31 (1.8)	CD44 (1.3)	GREB1 (1.2)	LRRC34 (1.2)	UIMC1 (1.1)	TNRC6B (1.1)	SULT1B1 (1.1)	ATM (1.1)	MYNN (1.0)
ENSG00000085840	ORC1 PPI subnetwork	0.00102	0.820216	NPAT (4.4)	KDELC2 (1.7)	OBFC1 (1.5)	ATM (1.5)	SLC38A2 (1.4)	FIP1L1 (1.3)	LRRC31 (1.3)	ENSG00000228397 (1.3)	MRPS31 (1.1)	LINC00339 (1.1)
GO:0031570	DNA integrity checkpoint	0.00113	0.820216	ZNF346 (2.5)	PSMD13 (2.3)	MRPS31 (2.2)	CUL5 (2.1)	NPAT (1.9)	ENSG00000228397 (1.7)	KDELC2 (1.5)	C11orf65 (1.4)	MYNN (1.2)	CDC42-IT1 (1.2)
ENSG00000171148	TADA3 PPI subnetwork	0.00129	0.820216	CDC42-IT1 (3.0)	FOXO1 (2.2)	DMRT1 (2.0)	TERT (1.9)	TNRC6B (1.8)	ATM (1.5)	NPAT (1.5)	ENSG00000226403 (1.4)	OBFC1 (1.4)	COG6 (1.3)
MP:0001926	female infertility	0.00131	0.820216	GREB1 (3.6)	FOXO1 (2.8)	ENSG00000226403 (2.8)	DMRT1 (2.5)	SALL1 (2.4)	LRRC31 (2.2)	KANK1 (2.2)	WT1-AS (1.8)	C11orf65 (1.5)	ODF3 (1.4)
GO:0000077	DNA damage checkpoint	0.00144	0.820216	PSMD13 (2.4)	ZNF346 (2.4)	MRPS31 (2.3)	CUL5 (2.1)	ENSG00000228397 (1.8)	C11orf65 (1.8)	NPAT (1.7)	MYNN (1.4)	KDELC2 (1.3)	CDC42-IT1 (1.3)
GO:0004601	peroxidase activity	0.00144	0.820216	ACAT1 (2.1)	SH3PXD2A (2.0)	LNX1 (1.7)	KDELC2 (1.7)	SALL1 (1.6)	HK3 (1.6)	DMRT1 (1.3)	PSMD13 (1.3)	WNT4 (1.3)	CD44 (1.0)
GO:0016684	oxidoreductase activity, acting on peroxide as acceptor	0.00144	0.820216	ACAT1 (2.1)	SH3PXD2A (2.0)	LNX1 (1.7)	KDELC2 (1.7)	SALL1 (1.6)	HK3 (1.6)	DMRT1 (1.3)	PSMD13 (1.3)	WNT4 (1.3)	CD44 (1.0)
ENSG00000196284	SUPT3H PPI subnetwork	0.00146	0.820216	UIMC1 (4.0)	MRPS31 (2.2)	RIC8A (1.8)	FIP1L1 (1.6)	DMRT1 (1.6)	LINC00339 (1.4)	ENSG00000226403 (1.4)	NPAT (1.3)	ENSG00000184378 (1.1)	MYNN (1.1)
ENSG00000116809	ZBTB17 PPI subnetwork	0.00156	0.820216	GREB1 (4.8)	TERT (2.0)	SLC38A1 (2.0)	WT1-AS (1.8)	FOXO1 (1.7)	LNX1 (1.7)	SALL1 (1.6)	TNRC6B (1.6)	ENSG00000184378 (1.5)	KANK1 (1.5)
MP:0009289	decreased epididymal fat pad weight	0.00156	0.820216	KANK1 (2.6)	CDC42-IT1 (2.3)	SLC38A2 (1.9)	FOXO1 (1.6)	LNX1 (1.6)	SLC25A15 (1.5)	ACAT1 (1.3)	ODF3 (1.1)	EXPH5 (1.1)	SCGB1C1 (1.1)
ENSG00000049618	ARID1B PPI subnetwork	0.00158	0.820216	TNRC6B (4.0)	ZNF346 (2.3)	ENSG00000228397 (2.2)	FOXO1 (1.7)	ENSG00000184378 (1.5)	GREB1 (1.5)	SALL1 (1.2)	LRRC34 (1.1)	CDC42-IT1 (1.1)	UIMC1 (1.1)
ENSG00000099860	GADD45B PPI subnetwork	0.00168	0.820216	FOXO1 (3.0)	MRPS31 (2.2)	LNX1 (2.1)	SALL1 (1.6)	COG6 (1.6)	ENSG00000258096 (1.4)	SLC25A15 (1.3)	FIP1L1 (1.2)	KANK1 (1.1)	GREB1 (1.1)
MP:0002874	decreased hemoglobin content	0.00172	0.820216	DMRT1 (1.4)	CD44 (1.3)	SLC25A15 (1.2)	SLC38A2 (1.0)	LNX1 (1.0)	ENSG00000258096 (1.0)	SALL1 (0.9)	HK3 (0.8)	CDC42-IT1 (0.7)	SH3PXD2A (0.7)
GO:0010608	posttranscriptional regulation of gene expression	0.00203	0.830909	ENSG00000228397 (2.4)	SLC38A2 (1.9)	C11orf65 (1.8)	DMRT1 (1.8)	FOXO1 (1.6)	UIMC1 (1.5)	CDC42 (1.4)	ENSG00000184378 (1.4)	SLC38A1 (1.3)	WT1-AS (1.3)
ENSG00000180210	F2 PPI subnetwork	0.00216	0.830909	SCGB1C1 (2.5)	SLC25A15 (2.2)	C11orf65 (1.8)	GREB1 (1.5)	CD44 (1.5)	SALL1 (1.5)	ENSG00000184378 (1.5)	WNT4 (1.3)	SLC38A2 (0.9)	ENSG00000258096 (0.9)
GO:0007050	cell cycle arrest	0.00218	0.830909	NPAT (2.9)	KDELC2 (2.3)	CUL5 (2.2)	MRPS31 (1.9)	PSMD13 (1.9)	ATM (1.8)	UIMC1 (1.7)	ZNF346 (1.5)	MYNN (1.4)	LINC00339 (1.3)
ENSG00000170312	CDK1 PPI subnetwork	0.00222	0.830909	SLC38A2 (2.1)	KDELC2 (1.7)	CD44 (1.4)	NPAT (1.4)	ACAT1 (1.3)	ZNF346 (1.2)	OBFC1 (1.1)	PSMD13 (1.0)	UIMC1 (1.0)	LINC00339 (0.9)
ENSG00000160917	CPSF4 PPI subnetwork	0.00222	0.830909	UIMC1 (2.8)	CUL5 (2.6)	MRPS31 (2.3)	CDC42-IT1 (1.7)	FIP1L1 (1.5)	MYNN (1.5)	CDC42 (1.4)	KDELC2 (1.0)	LINC00339 (0.9)	LRRC34 (0.8)
REACTOME_G2M_CHECKPOINTS	REACTOME_G2M_CHECKPOINTS	0.00223	0.830909	NPAT (4.8)	KDELC2 (1.9)	OBFC1 (1.9)	ATM (1.7)	UIMC1 (1.4)	MRPS31 (1.4)	MYNN (1.3)	LINC00339 (1.1)	LRRC31 (0.8)	ENSG00000226403 (0.8)
GO:0008340	determination of adult lifespan	0.00254	0.830909	CDC42-IT1 (2.7)	LINC00339 (2.4)	DMRT1 (2.4)	ENSG00000184378 (1.7)	OBFC1 (1.5)	ODF3 (1.4)	ENSG00000228397 (1.4)	SCGB1C1 (1.2)	NPAT (1.2)	ENSG00000258096 (1.2)
ENSG00000166986	MARS PPI subnetwork	0.00272	0.830909	MRPS31 (2.6)	RIC8A (2.5)	SLC38A2 (1.9)	CUL5 (1.3)	NPAT (1.1)	TNRC6B (1.1)	ATM (1.0)	SYNE1 (1.0)	ENSG00000184378 (0.8)	COG6 (0.8)
MP:0001127	small ovary	0.00279	0.830909	DMRT1 (2.7)	ENSG00000226403 (2.6)	GREB1 (2.1)	ODF3 (1.4)	WT1-AS (1.4)	KANK1 (1.4)	ENSG00000258096 (1.3)	LRRC34 (1.2)	EXPH5 (1.1)	LRRC31 (1.0)
ENSG00000134057	CCNB1 PPI subnetwork	0.00281	0.830909	MRPS31 (3.4)	UIMC1 (2.5)	LRRC34 (2.4)	NPAT (1.7)	FIP1L1 (1.5)	COG6 (1.5)	ZNF346 (1.4)	KDELC2 (1.2)	LRRC31 (1.1)	LNX1 (1.0)
MP:0002398	abnormal bone marrow cell morphology/development	0.00292	0.830909	HK3 (2.6)	OBFC1 (2.4)	CD44 (2.2)	LRRC31 (1.7)	GREB1 (1.7)	UIMC1 (1.5)	SLC38A2 (1.5)	FIP1L1 (1.2)	WNT4 (1.1)	ENSG00000228397 (1.1)
GO:0016209	antioxidant activity	0.00294	0.830909	ACAT1 (2.6)	HK3 (2.1)	LNX1 (2.0)	SALL1 (1.8)	SH3PXD2A (1.7)	KDELC2 (1.7)	SLC25A15 (1.3)	DMRT1 (1.2)	ENSG00000226403 (1.2)	SULT1B1 (1.1)
ENSG00000140307	GTF2A2 PPI subnetwork	0.00308	0.830909	DMRT1 (3.0)	MRPS31 (2.7)	FIP1L1 (2.5)	NPAT (2.4)	UIMC1 (2.4)	BET1L (2.0)	SLC25A15 (2.0)	ZNF346 (1.8)	RIC8A (1.7)	MYNN (1.7)
MP:0004762	increased anti-double stranded DNA antibody level	0.00318	0.830909	SLC38A1 (2.5)	HK3 (1.9)	FOXO1 (1.7)	CD44 (1.2)	WT1-AS (1.2)	ZNF346 (1.2)	WNT4 (1.0)	MRPS31 (0.9)	UIMC1 (0.9)	LNX1 (0.9)
ENSG00000174405	LIG4 PPI subnetwork	0.0032	0.830909	NPAT (3.6)	TNRC6B (2.6)	ATM (2.3)	FIP1L1 (2.3)	OBFC1 (2.2)	SYNE1 (2.1)	MRPS31 (1.6)	FOXO1 (1.4)	CUL5 (1.3)	COG6 (1.2)
GO:0008170	N-methyltransferase activity	0.00343	0.830909	UIMC1 (2.5)	ZNF346 (2.1)	ATM (1.8)	DMRT1 (1.8)	TNRC6B (1.8)	SLC25A15 (1.7)	TERT (1.6)	SIRT3 (1.5)	COG6 (1.5)	NPAT (1.3)
MP:0004771	increased anti-single stranded DNA antibody level	0.0036	0.830909	FOXO1 (3.3)	ZNF346 (2.4)	CD44 (2.4)	SULT1B1 (1.8)	NPAT (1.8)	C11orf65 (1.7)	ENSG00000228397 (1.7)	SYNE1 (1.6)	ENSG00000258096 (1.6)	GREB1 (1.6)
MP:0002703	abnormal renal tubule morphology	0.00363	0.830909	SALL1 (2.4)	ENSG00000228397 (2.4)	KANK1 (2.0)	SH3PXD2A (1.7)	SULT1B1 (1.6)	KDELC2 (1.6)	ENSG00000226403 (1.4)	OBFC1 (1.3)	SYNE1 (1.3)	WNT4 (1.2)
ENSG00000104320	NBN PPI subnetwork	0.00366	0.830909	NPAT (4.5)	ATM (3.7)	OBFC1 (2.6)	KDELC2 (2.4)	FIP1L1 (2.4)	LINC00339 (2.0)	UIMC1 (1.9)	TNRC6B (1.8)	SYNE1 (1.7)	SLC38A1 (1.6)
MP:0005168	abnormal female meiosis	0.00377	0.830909	DMRT1 (2.8)	UIMC1 (2.1)	COG6 (1.9)	ZNF346 (1.8)	ENSG00000226403 (1.6)	ATM (1.5)	NPAT (1.3)	ENSG00000228397 (1.3)	GREB1 (1.2)	LRRC34 (1.1)
ENSG00000141034	C17orf39 PPI subnetwork	0.00394	0.830909	CUL5 (3.0)	RIC8A (2.4)	FIP1L1 (2.3)	SCGB1C1 (2.2)	MRPS31 (2.1)	LNX1 (2.0)	SIRT3 (1.9)	COG6 (1.6)	BET1L (1.4)	SLC38A1 (1.3)
MP:0004796	increased anti-histone antibody level	0.00397	0.830909	FOXO1 (3.0)	ZNF346 (2.2)	SYNE1 (1.9)	SULT1B1 (1.9)	C11orf65 (1.8)	LNX1 (1.7)	NPAT (1.6)	CD44 (1.6)	OBFC1 (1.5)	WT1-AS (1.2)
GO:0034599	cellular response to oxidative stress	0.00412	0.830909	HK3 (2.5)	DMRT1 (2.2)	LNX1 (1.7)	SYNE1 (1.5)	ACAT1 (1.5)	ATM (1.5)	ENSG00000226403 (1.4)	SLC25A15 (1.3)	SIRT3 (1.1)	ZNF346 (1.0)
ENSG00000139687	RB1 PPI subnetwork	0.0043	0.830909	ZNF346 (2.5)	UIMC1 (2.2)	NPAT (2.0)	CDC42-IT1 (1.9)	FIP1L1 (1.5)	LRRC31 (1.4)	SLC38A2 (1.4)	ATM (1.2)	CD44 (1.2)	SLC25A15 (1.0)
ENSG00000206385	ENSG00000206385 PPI subnetwork	0.0045	0.830909	TNRC6B (3.4)	NPAT (2.8)	KDELC2 (2.3)	UIMC1 (2.0)	TERT (1.9)	OBFC1 (1.8)	SYNE1 (1.7)	DMRT1 (1.6)	CDC42-IT1 (1.5)	ENSG00000184378 (1.5)
ENSG00000137337	MDC1 PPI subnetwork	0.0045	0.830909	TNRC6B (3.4)	NPAT (2.8)	KDELC2 (2.3)	UIMC1 (2.0)	TERT (1.9)	OBFC1 (1.8)	SYNE1 (1.7)	DMRT1 (1.6)	CDC42-IT1 (1.5)	ENSG00000184378 (1.5)
KEGG_BASAL_TRANSCRIPTION_FACTORS	KEGG_BASAL_TRANSCRIPTION_FACTORS	0.00455	0.830909	MRPS31 (2.9)	DMRT1 (2.6)	SLC25A15 (2.5)	NPAT (2.2)	UIMC1 (2.2)	MYNN (2.1)	BET1L (1.6)	FIP1L1 (1.5)	ZNF346 (1.3)	ENSG00000226403 (1.3)
MP:0004505	decreased renal glomerulus number	0.00458	0.830909	WNT4 (4.0)	SALL1 (2.4)	GREB1 (1.7)	SCGB1C1 (1.7)	WT1-AS (1.3)	CUL5 (1.3)	EXPH5 (1.2)	SH3PXD2A (1.1)	TERT (1.1)	SLC38A1 (1.0)
ENSG00000020922	MRE11A PPI subnetwork	0.00498	0.830909	NPAT (4.2)	ATM (3.2)	OBFC1 (3.0)	KDELC2 (1.8)	FIP1L1 (1.7)	TNRC6B (1.6)	COG6 (1.5)	TERT (1.4)	CUL5 (1.3)	MRPS31 (1.3)
ENSG00000136518	ACTL6A PPI subnetwork	0.00522	0.830909	TERT (2.4)	FIP1L1 (2.3)	GREB1 (1.8)	TNRC6B (1.5)	UIMC1 (1.5)	FOXO1 (1.3)	CDC42-IT1 (1.2)	LRRC34 (1.2)	SULT1B1 (1.0)	LINC00339 (0.9)
ENSG00000012048	BRCA1 PPI subnetwork	0.00524	0.830909	NPAT (3.5)	FIP1L1 (2.3)	TNRC6B (2.3)	TERT (2.0)	ATM (2.0)	KDELC2 (1.6)	FOXO1 (1.6)	SLC38A2 (1.4)	UIMC1 (1.0)	CDC42-IT1 (0.9)
ENSG00000005339	CREBBP PPI subnetwork	0.00531	0.830909	SALL1 (2.9)	TNRC6B (2.8)	FOXO1 (2.6)	WT1-AS (1.7)	FIP1L1 (1.6)	UIMC1 (1.6)	SH3PXD2A (1.5)	NPAT (1.2)	WNT4 (0.9)	GREB1 (0.9)
ENSG00000119138	KLF9 PPI subnetwork	0.00562	0.830909	GREB1 (3.0)	ENSG00000228397 (2.6)	FIP1L1 (2.5)	LNX1 (2.1)	WNT4 (2.1)	CUL5 (1.9)	ENSG00000226403 (1.8)	DMRT1 (1.7)	SLC38A1 (1.6)	CDC42-IT1 (1.5)
MP:0006301	abnormal mesenchyme morphology	0.00579	0.830909	TNRC6B (2.5)	FIP1L1 (2.4)	SH3PXD2A (2.2)	KDELC2 (1.9)	SYNE1 (1.8)	LNX1 (1.8)	GREB1 (1.3)	CUL5 (1.0)	ENSG00000226403 (1.0)	DMRT1 (0.9)
GO:0070301	cellular response to hydrogen peroxide	0.00582	0.830909	HK3 (2.4)	KDELC2 (1.9)	LNX1 (1.9)	SYNE1 (1.6)	WT1-AS (1.5)	ZNF346 (1.4)	DMRT1 (1.4)	NPAT (1.3)	ENSG00000226403 (1.2)	KANK1 (1.1)
MP:0008182	decreased marginal zone B cell number	0.00584	0.830909	FOXO1 (3.6)	WNT4 (1.9)	SLC38A1 (1.8)	SULT1B1 (1.4)	UIMC1 (1.2)	ATM (1.1)	MYNN (1.0)	TNRC6B (1.0)	RIC8A (0.9)	BET1L (0.9)
GO:0007292	female gamete generation	0.00585	0.830909	C11orf65 (3.6)	GREB1 (3.2)	DMRT1 (3.1)	ENSG00000258096 (3.1)	ENSG00000226403 (2.6)	ODF3 (2.1)	KANK1 (1.4)	LINC00339 (1.1)	LRRC34 (1.1)	TERT (1.0)
MP:0004045	abnormal cell cycle checkpoint function	0.00592	0.830909	NPAT (2.1)	SLC38A2 (2.0)	ENSG00000226403 (1.9)	ATM (1.7)	TERT (1.6)	KDELC2 (1.4)	LRRC34 (1.4)	DMRT1 (1.3)	CUL5 (1.3)	LRRC31 (1.2)
ENSG00000108773	KAT2A PPI subnetwork	0.00604	0.830909	TNRC6B (3.6)	OBFC1 (2.1)	NPAT (2.0)	FIP1L1 (2.0)	CDC42-IT1 (2.0)	FOXO1 (1.8)	ATM (1.8)	UIMC1 (1.7)	RIC8A (1.5)	LINC00339 (1.3)
GO:0034502	protein localization to chromosome	0.00613	0.830909	ZNF346 (4.0)	NPAT (2.5)	C11orf65 (2.3)	CDC42-IT1 (2.1)	TERT (1.9)	DMRT1 (1.6)	ATM (1.5)	UIMC1 (1.5)	ENSG00000226403 (1.3)	CUL5 (1.2)
ENSG00000173867	ENSG00000173867 PPI subnetwork	0.00616	0.830909	MRPS31 (3.3)	BET1L (3.2)	ACAT1 (2.9)	COG6 (2.4)	PSMD13 (2.4)	TERT (2.1)	OBFC1 (2.0)	RIC8A (1.8)	SIRT3 (1.7)	SLC25A15 (1.6)
GO:0009084	glutamine family amino acid biosynthetic process	0.00624	0.830909	CDC42-IT1 (3.3)	SIRT3 (2.3)	SLC25A15 (2.0)	LINC00339 (1.8)	WT1-AS (1.4)	ENSG00000226403 (1.4)	DMRT1 (1.3)	OBFC1 (1.2)	ODF3 (1.2)	SULT1B1 (1.1)
ENSG00000173848	NET1 PPI subnetwork	0.00644	0.830909	ACAT1 (2.1)	SLC38A2 (2.1)	PSMD13 (1.6)	TERT (1.6)	CDC42 (1.5)	UIMC1 (1.5)	MRPS31 (1.3)	COG6 (0.9)	FIP1L1 (0.9)	SULT1B1 (0.8)
MP:0002211	abnormal primary sex determination	0.00678	0.830909	DMRT1 (5.4)	WT1-AS (3.7)	GREB1 (2.8)	TERT (2.5)	KANK1 (1.8)	EXPH5 (1.8)	SALL1 (1.7)	FOXO1 (1.7)	WNT4 (1.7)	LNX1 (1.6)
ENSG00000017427	IGF1 PPI subnetwork	0.00702	0.830909	GREB1 (2.9)	WNT4 (2.2)	SLC38A2 (2.0)	HK3 (1.8)	SH3PXD2A (1.8)	LNX1 (1.8)	SULT1B1 (1.3)	UIMC1 (1.3)	SALL1 (1.2)	LRRC31 (0.9)
ENSG00000108826	MRPL27 PPI subnetwork	0.00713	0.830909	MRPS31 (2.7)	ACAT1 (2.6)	PSMD13 (2.3)	FIP1L1 (2.2)	TERT (2.1)	ATM (1.7)	SLC25A15 (1.7)	DMRT1 (1.7)	COG6 (1.3)	UIMC1 (1.2)
GO:0008276	protein methyltransferase activity	0.00713	0.830909	UIMC1 (2.5)	CUL5 (2.1)	DMRT1 (1.8)	TNRC6B (1.8)	ZNF346 (1.6)	NPAT (1.6)	RIC8A (1.5)	SIRT3 (1.5)	COG6 (1.4)	ENSG00000226403 (1.4)
GO:0000075	cell cycle checkpoint	0.00719	0.830909	NPAT (3.2)	ZNF346 (2.6)	MRPS31 (2.2)	KDELC2 (1.9)	CUL5 (1.7)	PSMD13 (1.7)	UIMC1 (1.7)	FIP1L1 (1.6)	MYNN (1.6)	OBFC1 (1.4)
ENSG00000186951	PPARA PPI subnetwork	0.00733	0.830909	TNRC6B (4.1)	FOXO1 (3.6)	SULT1B1 (2.0)	CDC42-IT1 (2.0)	UIMC1 (1.6)	SYNE1 (1.5)	SH3PXD2A (1.4)	SIRT3 (1.1)	NPAT (1.0)	ENSG00000228397 (0.9)
ENSG00000142655	PEX14 PPI subnetwork	0.00737	0.830909	LINC00339 (3.8)	SIRT3 (2.3)	ACAT1 (2.3)	ENSG00000228397 (2.2)	ZNF346 (1.8)	COG6 (1.4)	LNX1 (1.4)	OBFC1 (1.4)	KANK1 (1.2)	LRRC34 (1.1)
REACTOME_DOUBLE:STRAND_BREAK_REPAIR	REACTOME_DOUBLE:STRAND_BREAK_REPAIR	0.00743	0.830909	NPAT (5.0)	OBFC1 (3.6)	ATM (2.7)	TERT (2.4)	KDELC2 (2.4)	MRPS31 (2.4)	LINC00339 (1.8)	UIMC1 (1.7)	TNRC6B (1.3)	FIP1L1 (1.1)
ENSG00000165417	GTF2A1 PPI subnetwork	0.00745	0.830909	MRPS31 (3.0)	NPAT (2.5)	FIP1L1 (2.4)	DMRT1 (2.2)	UIMC1 (2.0)	BET1L (1.5)	SLC25A15 (1.5)	ODF3 (1.4)	OBFC1 (1.3)	WNT4 (1.2)
ENSG00000085231	TAF9 PPI subnetwork	0.00766	0.830909	FIP1L1 (2.6)	UIMC1 (2.3)	NPAT (2.2)	MYNN (2.2)	MRPS31 (2.1)	ATM (2.0)	DMRT1 (1.8)	BET1L (1.6)	RIC8A (1.6)	FOXO1 (1.3)
REACTOME_MEIOSIS	REACTOME_MEIOSIS	0.00767	0.830909	NPAT (3.7)	ATM (2.9)	DMRT1 (2.8)	UIMC1 (2.7)	C11orf65 (2.5)	SCGB1C1 (2.4)	KDELC2 (1.9)	OBFC1 (1.7)	ENSG00000228397 (1.3)	CUL5 (0.9)
MP:0002740	heart hypoplasia	0.00768	0.830909	TNRC6B (2.3)	ENSG00000228397 (2.2)	ENSG00000226403 (2.0)	EXPH5 (1.9)	CDC42 (1.6)	WNT4 (1.6)	SLC38A1 (1.4)	COG6 (1.4)	GREB1 (1.3)	CDC42-IT1 (1.2)
MP:0009379	abnormal foot pigmentation	0.00779	0.830909	WNT4 (2.6)	ATM (1.9)	LRRC34 (1.7)	CD44 (1.7)	TNRC6B (1.7)	C11orf65 (1.4)	NPAT (1.4)	EXPH5 (1.3)	KANK1 (1.1)	SYNE1 (1.1)
GO:0016741	transferase activity, transferring one-carbon groups	0.00787	0.830909	SLC25A15 (2.5)	SIRT3 (2.2)	TERT (2.0)	MRPS31 (1.6)	RIC8A (1.3)	ATM (1.2)	ENSG00000226403 (1.2)	CUL5 (1.2)	ZNF346 (1.0)	MYNN (1.0)
GO:0000726	non-recombinational repair	0.00795	0.830909	OBFC1 (3.4)	ATM (3.1)	LINC00339 (2.3)	NPAT (2.1)	SYNE1 (1.8)	MRPS31 (1.6)	KDELC2 (1.6)	UIMC1 (1.4)	FIP1L1 (1.3)	COG6 (1.3)
ENSG00000166337	TAF10 PPI subnetwork	0.00795	0.830909	FIP1L1 (2.6)	RIC8A (2.4)	DMRT1 (2.3)	MYNN (2.0)	MRPS31 (1.9)	ENSG00000226403 (1.8)	UIMC1 (1.8)	NPAT (1.7)	OBFC1 (1.5)	SLC25A15 (1.5)
ENSG00000114686	MRPL3 PPI subnetwork	0.00815	0.830909	RIC8A (3.3)	BET1L (2.8)	SIRT3 (2.1)	MRPS31 (2.1)	TERT (2.1)	PSMD13 (2.0)	ACAT1 (1.9)	SLC25A15 (1.8)	COG6 (1.7)	SLC38A2 (1.6)
GO:0034614	cellular response to reactive oxygen species	0.00815	0.830909	HK3 (2.4)	ENSG00000226403 (1.9)	SYNE1 (1.8)	KDELC2 (1.5)	LNX1 (1.4)	ACAT1 (1.3)	KANK1 (1.2)	DMRT1 (1.2)	ZNF346 (1.2)	SIRT3 (1.0)
MP:0001914	hemorrhage	0.00827	0.830909	SCGB1C1 (2.2)	SH3PXD2A (2.1)	KANK1 (2.1)	FOXO1 (1.7)	UIMC1 (1.3)	TNRC6B (1.3)	KDELC2 (1.2)	SLC38A2 (1.1)	SALL1 (1.1)	MYNN (1.0)
ENSG00000177302	TOP3A PPI subnetwork	0.00834	0.830909	NPAT (3.4)	ATM (3.1)	LINC00339 (2.2)	MRPS31 (2.1)	UIMC1 (2.0)	OBFC1 (1.8)	TERT (1.7)	MYNN (1.5)	KDELC2 (1.4)	ZNF346 (1.4)
ENSG00000135144	DTX1 PPI subnetwork	0.00839	0.830909	LRRC34 (3.6)	TNRC6B (1.9)	DMRT1 (1.6)	SALL1 (1.6)	OBFC1 (1.5)	ENSG00000184378 (1.5)	ENSG00000226403 (1.5)	TERT (1.2)	EXPH5 (0.9)	SCGB1C1 (0.8)
MP:0000120	malocclusion	0.00843	0.830909	SH3PXD2A (3.0)	SALL1 (2.6)	EXPH5 (2.3)	CD44 (2.3)	ENSG00000184378 (2.1)	OBFC1 (2.1)	KANK1 (1.9)	ENSG00000258096 (1.9)	DMRT1 (1.7)	TERT (1.6)
GO:0071216	cellular response to biotic stimulus	0.00853	0.830909	CDC42-IT1 (1.9)	HK3 (1.6)	SULT1B1 (1.6)	GREB1 (1.4)	LNX1 (1.4)	DMRT1 (1.4)	ENSG00000184378 (1.4)	LRRC31 (1.1)	EXPH5 (1.1)	FOXO1 (0.9)
ENSG00000013583	HEBP1 PPI subnetwork	0.00855	0.830909	ACAT1 (2.4)	SALL1 (2.2)	LRRC31 (2.0)	ENSG00000226403 (1.4)	SLC38A2 (1.4)	MRPS31 (1.2)	SLC25A15 (1.1)	COG6 (1.1)	OBFC1 (1.1)	LRRC34 (1.1)
ENSG00000215120	ENSG00000215120 PPI subnetwork	0.00869	0.830909	FIP1L1 (2.5)	UIMC1 (2.5)	CDC42-IT1 (2.2)	MRPS31 (1.7)	RIC8A (1.7)	BET1L (1.5)	SALL1 (1.5)	SLC25A15 (1.5)	TNRC6B (1.3)	ENSG00000184378 (1.3)
ENSG00000143995	MEIS1 PPI subnetwork	0.00872	0.830909	SALL1 (5.0)	TNRC6B (2.8)	WT1-AS (2.6)	KANK1 (2.6)	ENSG00000226403 (2.1)	ENSG00000184378 (1.6)	LRRC31 (1.6)	LRRC34 (1.4)	ENSG00000228397 (1.3)	GREB1 (1.2)
GO:0008757	S-adenosylmethionine-dependent methyltransferase activity	0.00872	0.830909	SIRT3 (2.2)	SLC25A15 (1.9)	UIMC1 (1.8)	TERT (1.7)	COG6 (1.4)	ZNF346 (1.4)	MRPS31 (1.4)	RIC8A (1.4)	ATM (1.4)	TNRC6B (1.3)
ENSG00000155508	CNOT8 PPI subnetwork	0.00905	0.830909	TNRC6B (3.9)	NPAT (2.3)	ENSG00000228397 (2.1)	SLC38A2 (2.0)	FIP1L1 (1.8)	MYNN (1.7)	FOXO1 (1.5)	C11orf65 (1.1)	WT1-AS (1.1)	SLC38A1 (1.1)
ENSG00000172613	RAD9A PPI subnetwork	0.0093	0.830909	NPAT (4.3)	MRPS31 (2.2)	ATM (2.1)	COG6 (2.1)	TERT (2.0)	UIMC1 (2.0)	OBFC1 (1.8)	LRRC31 (1.6)	LINC00339 (1.5)	KDELC2 (1.3)
ENSG00000134398	ERN2 PPI subnetwork	0.00954	0.830909	ZNF346 (1.9)	BET1L (1.7)	LRRC31 (1.6)	SLC38A2 (1.4)	PSMD13 (1.3)	EXPH5 (1.3)	MRPS31 (1.3)	SLC25A15 (1.3)	KDELC2 (1.2)	WT1-AS (1.1)
GO:0006417	regulation of translation	0.00965	0.830909	ENSG00000228397 (2.9)	SLC38A1 (2.0)	UIMC1 (1.9)	C11orf65 (1.9)	DMRT1 (1.8)	MYNN (1.8)	WT1-AS (1.7)	ENSG00000184378 (1.7)	CDC42-IT1 (1.3)	ZNF346 (1.2)
ENSG00000214528	ENSG00000214528 PPI subnetwork	0.00976	0.830909	SALL1 (4.5)	TNRC6B (3.0)	KANK1 (2.5)	ENSG00000226403 (2.0)	WT1-AS (1.9)	ENSG00000184378 (1.6)	LRRC31 (1.5)	ENSG00000228397 (1.4)	LRRC34 (1.4)	GREB1 (1.1)
GO:0000288	nuclear-transcribed mRNA catabolic process, deadenylation-dependent decay	0.00985	0.830909	MYNN (4.2)	UIMC1 (2.7)	MRPS31 (2.7)	LINC00339 (2.6)	CDC42-IT1 (2.2)	C11orf65 (1.8)	ATM (1.5)	NPAT (1.5)	CUL5 (1.5)	ENSG00000258096 (1.3)
GO:0008168	methyltransferase activity	0.00996	0.830909	SIRT3 (2.4)	SLC25A15 (2.2)	TERT (1.8)	MRPS31 (1.5)	CUL5 (1.3)	RIC8A (1.2)	ENSG00000226403 (1.2)	MYNN (1.1)	ATM (1.1)	ZNF346 (1.1)
ENSG00000197780	TAF13 PPI subnetwork	0.01	0.830909	MRPS31 (3.5)	FIP1L1 (3.2)	UIMC1 (3.0)	NPAT (2.3)	MYNN (2.3)	RIC8A (2.3)	DMRT1 (2.2)	BET1L (1.9)	FOXO1 (1.8)	COG6 (1.5)
ENSG00000106615	RHEB PPI subnetwork	0.01	0.830909	TNRC6B (3.0)	UIMC1 (3.0)	COG6 (1.6)	MYNN (1.6)	RIC8A (1.5)	ENSG00000184378 (1.5)	KANK1 (1.5)	WNT4 (1.5)	SIRT3 (1.4)	ENSG00000258096 (1.4)
ENSG00000166793	YPEL4 PPI subnetwork	0.01	0.830909	FIP1L1 (2.7)	RIC8A (2.2)	MRPS31 (2.0)	CDC42 (1.9)	PSMD13 (1.7)	CDC42-IT1 (1.5)	FOXO1 (1.4)	WT1-AS (1.3)	BET1L (1.2)	TERT (1.1)
ENSG00000105926	MPP6 PPI subnetwork	0.01	0.830909	MRPS31 (3.4)	C11orf65 (2.0)	SYNE1 (1.9)	FIP1L1 (1.6)	RIC8A (1.4)	ODF3 (1.3)	SCGB1C1 (1.3)	CDC42-IT1 (1.3)	UIMC1 (1.0)	KDELC2 (0.9)
ENSG00000171421	MRPL36 PPI subnetwork	0.01	0.830909	OBFC1 (2.5)	TERT (2.4)	SLC38A2 (2.3)	RIC8A (2.2)	PSMD13 (2.1)	SLC25A15 (1.9)	BET1L (1.8)	NPAT (1.8)	SIRT3 (1.7)	ACAT1 (1.5)
GO:0051325	interphase	0.01	0.830909	NPAT (3.3)	ZNF346 (3.1)	ENSG00000228397 (2.1)	KDELC2 (2.1)	OBFC1 (1.9)	UIMC1 (1.9)	TERT (1.9)	PSMD13 (1.5)	ATM (1.3)	CDC42-IT1 (1.2)
ENSG00000139613	SMARCC2 PPI subnetwork	0.01	0.830909	TNRC6B (2.7)	NPAT (2.5)	FIP1L1 (2.3)	MRPS31 (1.8)	ATM (1.4)	SCGB1C1 (1.3)	ENSG00000184378 (1.3)	FOXO1 (1.3)	CUL5 (1.1)	DMRT1 (1.0)
ENSG00000064313	TAF2 PPI subnetwork	0.01	0.830909	DMRT1 (2.8)	UIMC1 (2.5)	FIP1L1 (2.4)	CDC42-IT1 (2.3)	LINC00339 (2.1)	CUL5 (2.0)	MRPS31 (1.9)	ENSG00000226403 (1.5)	OBFC1 (1.4)	COG6 (1.4)
GO:2000602	regulation of interphase of mitotic cell cycle	0.01	0.830909	PSMD13 (2.8)	ZNF346 (2.3)	MRPS31 (1.9)	MYNN (1.6)	CDC42-IT1 (1.5)	ENSG00000228397 (1.4)	CDC42 (1.4)	ENSG00000258096 (1.2)	CUL5 (1.2)	NPAT (1.2)
ENSG00000205022	PABPN1L PPI subnetwork	0.01	0.830909	FIP1L1 (3.3)	CUL5 (3.0)	OBFC1 (2.6)	KANK1 (2.4)	SYNE1 (2.4)	ENSG00000228397 (2.1)	ACAT1 (2.0)	EXPH5 (1.9)	KDELC2 (1.8)	DMRT1 (1.5)
REACTOME_DEADENYLATION:DEPENDENT_MRNA_DECAY	REACTOME_DEADENYLATION:DEPENDENT_MRNA_DECAY	0.01	0.830909	MYNN (3.7)	UIMC1 (2.9)	MRPS31 (2.8)	FIP1L1 (1.7)	NPAT (1.7)	CUL5 (1.7)	C11orf65 (1.6)	LINC00339 (1.5)	ATM (1.3)	ENSG00000228397 (1.3)
GO:0006730	one-carbon metabolic process	0.01	0.830909	UIMC1 (2.1)	TERT (2.0)	SLC25A15 (2.0)	C11orf65 (1.5)	DMRT1 (1.5)	ENSG00000226403 (1.4)	ATM (1.4)	LRRC34 (1.3)	CUL5 (1.2)	NPAT (1.2)
ENSG00000172732	MUS81 PPI subnetwork	0.01	0.830909	ENSG00000228397 (2.0)	ATM (1.9)	C11orf65 (1.3)	FIP1L1 (1.3)	TERT (1.1)	PSMD13 (1.1)	MRPS31 (1.1)	ZNF346 (1.0)	DMRT1 (1.0)	SLC38A2 (0.9)
ENSG00000101412	E2F1 PPI subnetwork	0.01	0.830909	NPAT (4.0)	TNRC6B (3.3)	ATM (1.8)	MRPS31 (1.8)	LINC00339 (1.6)	WT1-AS (1.4)	MYNN (1.4)	SYNE1 (1.4)	SLC38A2 (1.3)	LRRC31 (1.3)
MP:0002640	reticulocytosis	0.01	0.830909	SYNE1 (1.9)	TNRC6B (1.7)	SLC25A15 (1.6)	SH3PXD2A (0.9)	LNX1 (0.8)	GREB1 (0.8)	ATM (0.7)	DMRT1 (0.7)	TERT (0.7)	SLC38A2 (0.6)
GO:0006302	double-strand break repair	0.01	0.830909	NPAT (3.4)	OBFC1 (3.2)	LINC00339 (2.7)	ATM (2.5)	KDELC2 (2.3)	TERT (2.2)	MRPS31 (2.1)	ZNF346 (2.1)	UIMC1 (1.8)	DMRT1 (1.4)
GO:0015074	DNA integration	0.01	0.830909	C11orf65 (3.6)	DMRT1 (2.6)	OBFC1 (2.2)	MYNN (2.0)	MRPS31 (2.0)	FIP1L1 (1.7)	CUL5 (1.6)	NPAT (1.5)	LINC00339 (1.2)	LNX1 (1.2)
GO:0051329	interphase of mitotic cell cycle	0.01	0.830909	NPAT (3.2)	ZNF346 (3.1)	TERT (2.1)	KDELC2 (2.1)	OBFC1 (2.0)	UIMC1 (1.9)	ENSG00000228397 (1.7)	PSMD13 (1.6)	MYNN (1.4)	ATM (1.2)
ENSG00000185658	BRWD1 PPI subnetwork	0.01	0.830909	CUL5 (4.0)	ATM (2.6)	ZNF346 (2.4)	MYNN (2.2)	LINC00339 (2.1)	NPAT (2.0)	UIMC1 (1.7)	SLC38A2 (1.6)	TNRC6B (1.4)	CDC42-IT1 (1.4)
ENSG00000104738	MCM4 PPI subnetwork	0.01	0.830909	NPAT (3.7)	OBFC1 (2.5)	ENSG00000228397 (1.7)	UIMC1 (1.5)	ATM (1.5)	ENSG00000184378 (1.3)	KDELC2 (1.2)	PSMD13 (1.1)	ZNF346 (0.9)	SYNE1 (0.8)
GO:0004715	non-membrane spanning protein tyrosine kinase activity	0.01	0.830909	HK3 (2.8)	ATM (2.2)	SYNE1 (2.2)	SULT1B1 (1.8)	C11orf65 (1.7)	LNX1 (1.5)	ENSG00000226403 (1.4)	LRRC34 (1.3)	WT1-AS (1.3)	OBFC1 (1.1)
REACTOME_PROCESSING_OF_INTRONLESS_PRE:MRNAS	REACTOME_PROCESSING_OF_INTRONLESS_PRE:MRNAS	0.01	0.830909	MYNN (2.5)	CUL5 (2.0)	BET1L (1.6)	GREB1 (1.6)	NPAT (1.5)	SALL1 (1.3)	RIC8A (1.3)	ENSG00000258096 (1.2)	ATM (1.2)	FIP1L1 (1.1)
ENSG00000144580	RQCD1 PPI subnetwork	0.01	0.830909	NPAT (3.2)	SLC38A2 (2.3)	ENSG00000228397 (2.0)	SCGB1C1 (1.8)	UIMC1 (1.8)	MYNN (1.4)	HK3 (1.3)	FIP1L1 (1.1)	ENSG00000184378 (1.1)	TNRC6B (1.1)
ENSG00000149311	ATM PPI subnetwork	0.01	0.830909	NPAT (4.9)	ATM (3.3)	OBFC1 (2.7)	KDELC2 (2.3)	TERT (2.2)	UIMC1 (2.1)	CUL5 (1.8)	FIP1L1 (1.5)	ACAT1 (1.2)	SYNE1 (1.2)
MP:0005289	increased oxygen consumption	0.01	0.830909	SULT1B1 (2.6)	FOXO1 (1.9)	TNRC6B (1.7)	SLC25A15 (1.4)	LRRC31 (1.3)	KANK1 (1.2)	NPAT (1.2)	GREB1 (1.1)	SYNE1 (1.1)	TERT (1.0)
ENSG00000137547	MRPL15 PPI subnetwork	0.01	0.830909	ACAT1 (3.6)	BET1L (3.6)	RIC8A (3.5)	COG6 (3.3)	CUL5 (2.6)	PSMD13 (2.4)	SIRT3 (1.9)	FIP1L1 (1.8)	MRPS31 (1.7)	ATM (1.6)
GO:0071156	regulation of cell cycle arrest	0.01	0.830909	NPAT (3.0)	ZNF346 (2.5)	KDELC2 (2.1)	MRPS31 (2.0)	UIMC1 (1.8)	PSMD13 (1.8)	CUL5 (1.6)	FIP1L1 (1.6)	LINC00339 (1.4)	MYNN (1.3)
MP:0008186	increased pro-B cell number	0.01	0.830909	FOXO1 (2.8)	TERT (2.6)	LRRC34 (2.5)	SLC38A1 (2.4)	HK3 (1.4)	NPAT (1.3)	CD44 (1.1)	LNX1 (1.0)	SLC25A15 (1.0)	SH3PXD2A (0.9)
ENSG00000113300	CNOT6 PPI subnetwork	0.01	0.830909	FIP1L1 (2.5)	TNRC6B (2.1)	PSMD13 (1.5)	MRPS31 (1.5)	UIMC1 (1.4)	SLC38A1 (1.4)	NPAT (1.4)	MYNN (1.4)	COG6 (1.3)	LRRC34 (1.2)
MP:0002705	dilated renal tubules	0.01	0.830909	WT1-AS (4.2)	SALL1 (2.4)	WNT4 (2.3)	KANK1 (2.3)	ENSG00000226403 (2.1)	OBFC1 (1.8)	DMRT1 (1.8)	KDELC2 (1.6)	SYNE1 (1.5)	ODF3 (0.7)
GO:0051592	response to calcium ion	0.01	0.830909	CDC42-IT1 (3.7)	C11orf65 (2.4)	ENSG00000258096 (2.2)	LNX1 (2.1)	KANK1 (1.8)	SYNE1 (1.6)	TNRC6B (1.4)	LINC00339 (1.1)	ODF3 (1.0)	WNT4 (1.0)
ENSG00000104368	PLAT PPI subnetwork	0.01	0.830909	CD44 (2.2)	WNT4 (2.0)	DMRT1 (1.8)	KDELC2 (1.6)	SYNE1 (1.4)	C11orf65 (1.4)	SLC38A2 (1.3)	ENSG00000258096 (1.2)	GREB1 (1.1)	LRRC34 (0.8)
ENSG00000111653	ING4 PPI subnetwork	0.02	0.900598	TNRC6B (2.0)	SCGB1C1 (1.6)	ENSG00000228397 (1.5)	KDELC2 (1.3)	FIP1L1 (1.2)	ATM (1.2)	DMRT1 (1.2)	UIMC1 (1.2)	OBFC1 (1.2)	SYNE1 (1.0)
GO:0000279	M phase	0.02	0.900598	KDELC2 (2.9)	NPAT (2.8)	ATM (2.5)	ZNF346 (2.4)	UIMC1 (2.0)	C11orf65 (1.9)	OBFC1 (1.7)	ENSG00000226403 (1.5)	COG6 (1.4)	DMRT1 (1.4)
ENSG00000080802	CNOT4 PPI subnetwork	0.02	0.900598	COG6 (2.4)	ENSG00000226403 (2.1)	UIMC1 (2.1)	FIP1L1 (2.1)	CDC42 (2.1)	DMRT1 (1.8)	KANK1 (1.8)	PSMD13 (1.7)	ZNF346 (1.2)	LRRC34 (1.2)
GO:0046965	retinoid X receptor binding	0.02	0.900598	ZNF346 (3.0)	ENSG00000184378 (2.5)	BET1L (1.7)	CDC42-IT1 (1.2)	LRRC31 (1.1)	FIP1L1 (1.1)	UIMC1 (1.1)	SH3PXD2A (1.1)	TNRC6B (1.1)	GREB1 (1.0)
ENSG00000215719	ENSG00000215719 PPI subnetwork	0.02	0.900598	UIMC1 (3.8)	MRPS31 (2.5)	FIP1L1 (2.4)	COG6 (2.4)	TNRC6B (2.1)	NPAT (2.0)	FOXO1 (1.8)	DMRT1 (1.8)	MYNN (1.6)	ENSG00000226403 (1.4)
ENSG00000095380	NANS PPI subnetwork	0.02	0.900598	SLC38A2 (3.7)	ACAT1 (2.8)	SLC38A1 (2.6)	ATM (1.7)	DMRT1 (1.5)	SALL1 (1.3)	LRRC31 (1.3)	PSMD13 (1.1)	KDELC2 (1.1)	SCGB1C1 (0.9)
GO:0042974	retinoic acid receptor binding	0.02	0.900598	ENSG00000184378 (3.6)	ZNF346 (3.2)	TNRC6B (1.7)	SH3PXD2A (1.7)	BET1L (1.5)	RIC8A (1.5)	CDC42-IT1 (1.5)	FIP1L1 (1.3)	GREB1 (1.3)	UIMC1 (1.2)
ENSG00000004700	RECQL PPI subnetwork	0.02	0.900598	ATM (3.4)	TERT (3.1)	NPAT (2.7)	OBFC1 (2.7)	MRPS31 (1.6)	FIP1L1 (1.6)	ZNF346 (1.5)	UIMC1 (1.5)	LINC00339 (1.3)	KDELC2 (1.2)
ENSG00000132170	PPARG PPI subnetwork	0.02	0.900598	TNRC6B (4.2)	UIMC1 (3.0)	FOXO1 (2.9)	SULT1B1 (2.4)	GREB1 (1.5)	FIP1L1 (1.4)	SYNE1 (1.4)	LNX1 (1.2)	MRPS31 (1.0)	DMRT1 (1.0)
GO:0006367	transcription initiation from RNA polymerase II promoter	0.02	0.900598	MRPS31 (2.7)	ZNF346 (2.3)	NPAT (2.3)	FIP1L1 (2.3)	UIMC1 (2.0)	MYNN (1.9)	RIC8A (1.7)	COG6 (1.6)	SLC25A15 (1.5)	BET1L (1.5)
MP:0005621	abnormal cell physiology	0.02	0.900598	TNRC6B (2.2)	CD44 (2.2)	NPAT (2.0)	UIMC1 (2.0)	ATM (1.9)	SLC38A2 (1.8)	SLC25A15 (1.6)	RIC8A (1.4)	KDELC2 (1.3)	ZNF346 (1.2)
REACTOME_ACTIVATION_OF_ATR_IN_RESPONSE_TO_REPLICATION_STRESS	REACTOME_ACTIVATION_OF_ATR_IN_RESPONSE_TO_REPLICATION_STRESS	0.02	0.900598	NPAT (4.8)	OBFC1 (1.9)	ATM (1.7)	KDELC2 (1.7)	MRPS31 (1.7)	UIMC1 (1.6)	MYNN (1.4)	LRRC31 (0.9)	ZNF346 (0.8)	ENSG00000258096 (0.8)
ENSG00000130699	TAF4 PPI subnetwork	0.02	0.900598	MRPS31 (2.7)	FIP1L1 (2.6)	UIMC1 (2.2)	DMRT1 (2.1)	TNRC6B (2.1)	RIC8A (2.0)	FOXO1 (1.4)	BET1L (1.2)	NPAT (1.2)	CUL5 (1.2)
ENSG00000115685	PPP1R7 PPI subnetwork	0.02	0.900598	LRRC34 (2.5)	TERT (2.5)	KDELC2 (2.2)	OBFC1 (2.1)	CDC42-IT1 (2.1)	RIC8A (1.9)	PSMD13 (1.9)	LNX1 (1.8)	C11orf65 (1.7)	CDC42 (1.6)
REACTOME_RNA_POLYMERASE_II_TRANSCRIPTION_INITIATION	REACTOME_RNA_POLYMERASE_II_TRANSCRIPTION_INITIATION	0.02	0.900598	MRPS31 (3.2)	RIC8A (2.9)	SLC25A15 (2.4)	BET1L (2.4)	PSMD13 (2.1)	MYNN (2.1)	FIP1L1 (2.1)	NPAT (2.1)	DMRT1 (1.7)	UIMC1 (1.5)
REACTOME_RNA_POLYMERASE_II_HIV:1_PROMOTER_ESCAPE	REACTOME_RNA_POLYMERASE_II_HIV:1_PROMOTER_ESCAPE	0.02	0.900598	MRPS31 (3.2)	RIC8A (2.9)	SLC25A15 (2.4)	BET1L (2.4)	PSMD13 (2.1)	MYNN (2.1)	FIP1L1 (2.1)	NPAT (2.1)	DMRT1 (1.7)	UIMC1 (1.5)
REACTOME_RNA_POLYMERASE_II_TRANSCRIPTION_INITIATION_AND_PROMOTER_CLEARANCE	REACTOME_RNA_POLYMERASE_II_TRANSCRIPTION_INITIATION_AND_PROMOTER_CLEARANCE	0.02	0.900598	MRPS31 (3.2)	RIC8A (2.9)	SLC25A15 (2.4)	BET1L (2.4)	PSMD13 (2.1)	MYNN (2.1)	FIP1L1 (2.1)	NPAT (2.1)	DMRT1 (1.7)	UIMC1 (1.5)
REACTOME_RNA_POLYMERASE_II_PROMOTER_ESCAPE	REACTOME_RNA_POLYMERASE_II_PROMOTER_ESCAPE	0.02	0.900598	MRPS31 (3.2)	RIC8A (2.9)	SLC25A15 (2.4)	BET1L (2.4)	PSMD13 (2.1)	MYNN (2.1)	FIP1L1 (2.1)	NPAT (2.1)	DMRT1 (1.7)	UIMC1 (1.5)
REACTOME_HIV:1_TRANSCRIPTION_INITIATION	REACTOME_HIV:1_TRANSCRIPTION_INITIATION	0.02	0.900598	MRPS31 (3.2)	RIC8A (2.9)	SLC25A15 (2.4)	BET1L (2.4)	PSMD13 (2.1)	MYNN (2.1)	FIP1L1 (2.1)	NPAT (2.1)	DMRT1 (1.7)	UIMC1 (1.5)
REACTOME_RNA_POLYMERASE_II_TRANSCRIPTION_PRE:INITIATION_AND_PROMOTER_OPENING	REACTOME_RNA_POLYMERASE_II_TRANSCRIPTION_PRE:INITIATION_AND_PROMOTER_OPENING	0.02	0.900598	MRPS31 (3.2)	RIC8A (2.9)	SLC25A15 (2.4)	BET1L (2.4)	PSMD13 (2.1)	MYNN (2.1)	FIP1L1 (2.1)	NPAT (2.1)	DMRT1 (1.7)	UIMC1 (1.5)
REACTOME_CELL_CYCLE	REACTOME_CELL_CYCLE	0.02	0.900598	NPAT (2.9)	ATM (1.8)	PSMD13 (1.7)	KDELC2 (1.4)	OBFC1 (1.4)	ZNF346 (1.4)	UIMC1 (1.3)	FIP1L1 (1.2)	MRPS31 (1.2)	TERT (0.9)
ENSG00000163346	PBXIP1 PPI subnetwork	0.02	0.900598	TNRC6B (4.7)	DMRT1 (2.2)	ZNF346 (1.7)	ENSG00000228397 (1.6)	OBFC1 (1.4)	ATM (1.3)	ENSG00000184378 (1.2)	BET1L (1.1)	TERT (1.1)	UIMC1 (1.0)
GO:0040018	positive regulation of multicellular organism growth	0.02	0.900598	ENSG00000258096 (3.0)	TNRC6B (1.5)	SLC38A1 (1.3)	GREB1 (1.1)	TERT (1.1)	KANK1 (0.9)	LNX1 (0.7)	SULT1B1 (0.7)	LRRC31 (0.7)	WT1-AS (0.7)
GO:0000794	condensed nuclear chromosome	0.02	0.900598	ATM (3.3)	NPAT (2.7)	DMRT1 (2.1)	TERT (1.5)	KDELC2 (1.4)	ZNF346 (1.3)	UIMC1 (1.2)	FIP1L1 (1.1)	CUL5 (1.0)	ACAT1 (1.0)
ENSG00000126561	STAT5A PPI subnetwork	0.02	0.900598	FOXO1 (2.5)	TNRC6B (2.3)	ENSG00000184378 (1.6)	TERT (1.4)	SLC38A2 (1.2)	FIP1L1 (1.2)	SLC25A15 (1.1)	CD44 (1.0)	NPAT (1.0)	LNX1 (0.9)
MP:0008173	increased follicular B cell number	0.02	0.900598	UIMC1 (1.7)	SULT1B1 (1.6)	SLC38A1 (1.5)	NPAT (1.4)	OBFC1 (1.4)	LRRC34 (1.2)	WNT4 (1.2)	LRRC31 (1.0)	FOXO1 (1.0)	WT1-AS (1.0)
GO:0017148	negative regulation of translation	0.02	0.900598	WT1-AS (4.2)	ENSG00000228397 (2.3)	LRRC34 (2.1)	ENSG00000258096 (1.8)	SLC38A1 (1.8)	CDC42-IT1 (1.6)	MYNN (1.6)	UIMC1 (1.6)	TNRC6B (1.5)	BET1L (1.4)
ENSG00000185973	TMLHE PPI subnetwork	0.02	0.900598	RIC8A (2.7)	BET1L (2.3)	MYNN (2.3)	PSMD13 (2.2)	SIRT3 (1.7)	ATM (1.4)	MRPS31 (1.3)	ENSG00000184378 (1.3)	LINC00339 (1.1)	LNX1 (1.1)
ENSG00000096717	SIRT1 PPI subnetwork	0.02	0.900598	TNRC6B (3.3)	SLC38A1 (2.5)	TERT (2.0)	NPAT (1.8)	CDC42 (1.4)	ENSG00000228397 (1.1)	SCGB1C1 (1.0)	SYNE1 (0.9)	GREB1 (0.8)	FOXO1 (0.8)
GO:0004386	helicase activity	0.02	0.900598	TERT (2.8)	ATM (2.6)	FIP1L1 (2.5)	NPAT (2.3)	DMRT1 (2.0)	UIMC1 (1.7)	OBFC1 (1.4)	LRRC34 (1.3)	CUL5 (1.1)	MYNN (1.0)
ENSG00000167461	RAB8A PPI subnetwork	0.02	0.900598	ENSG00000226403 (1.8)	TNRC6B (1.7)	SYNE1 (1.6)	LNX1 (1.6)	RIC8A (1.4)	NPAT (1.2)	FIP1L1 (1.2)	GREB1 (1.1)	CDC42 (1.1)	ACAT1 (1.0)
GO:0030194	positive regulation of blood coagulation	0.02	0.900598	SLC25A15 (1.6)	CUL5 (1.3)	ODF3 (1.2)	LRRC34 (1.2)	LINC00339 (1.2)	ENSG00000226403 (1.0)	TERT (0.9)	LNX1 (0.9)	MYNN (0.8)	COG6 (0.8)
ENSG00000174371	EXO1 PPI subnetwork	0.02	0.900598	ATM (3.6)	NPAT (3.4)	KDELC2 (2.7)	LRRC31 (2.0)	FIP1L1 (1.9)	COG6 (1.7)	UIMC1 (1.6)	MYNN (1.5)	LNX1 (1.5)	ENSG00000228397 (1.4)
GO:0042770	signal transduction in response to DNA damage	0.02	0.900598	ENSG00000228397 (2.8)	PSMD13 (2.6)	MYNN (1.9)	LINC00339 (1.7)	MRPS31 (1.6)	NPAT (1.4)	DMRT1 (1.2)	CUL5 (1.1)	FIP1L1 (1.1)	ZNF346 (1.0)
ENSG00000127564	PKMYT1 PPI subnetwork	0.02	0.900598	COG6 (2.6)	TNRC6B (2.3)	ATM (2.2)	ODF3 (1.9)	ZNF346 (1.7)	LRRC31 (1.7)	CUL5 (1.5)	KANK1 (1.5)	UIMC1 (1.2)	ACAT1 (1.2)
ENSG00000105135	ILVBL PPI subnetwork	0.02	0.900598	PSMD13 (2.4)	OBFC1 (2.2)	ACAT1 (2.0)	ATM (1.8)	MYNN (1.8)	COG6 (1.8)	SLC38A2 (1.7)	SLC38A1 (1.6)	MRPS31 (1.3)	SCGB1C1 (1.1)
ENSG00000114942	EEF1B2 PPI subnetwork	0.02	0.900598	ENSG00000184378 (3.0)	OBFC1 (1.7)	SLC38A2 (1.5)	CD44 (1.4)	COG6 (1.3)	PSMD13 (1.2)	ACAT1 (1.1)	MRPS31 (1.1)	GREB1 (0.9)	SLC38A1 (0.8)
ENSG00000102554	KLF5 PPI subnetwork	0.02	0.900598	TNRC6B (2.3)	FIP1L1 (2.2)	FOXO1 (1.8)	MRPS31 (1.3)	SLC38A2 (0.9)	SULT1B1 (0.9)	CD44 (0.9)	SH3PXD2A (0.9)	LRRC34 (0.7)	UIMC1 (0.7)
MP:0000552	abnormal radius morphology	0.02	0.900598	SALL1 (4.3)	EXPH5 (3.1)	SLC38A1 (2.5)	ENSG00000228397 (2.2)	GREB1 (2.1)	KANK1 (1.7)	SH3PXD2A (1.7)	WNT4 (1.6)	WT1-AS (1.6)	ENSG00000184378 (1.1)
ENSG00000136273	HUS1 PPI subnetwork	0.02	0.900598	NPAT (2.5)	UIMC1 (2.5)	MRPS31 (2.2)	PSMD13 (2.2)	CDC42 (2.1)	OBFC1 (1.8)	ENSG00000258096 (1.7)	KDELC2 (1.4)	MYNN (1.3)	LINC00339 (1.2)
MP:0003215	renal interstitial fibrosis	0.02	0.900598	WT1-AS (5.4)	KANK1 (2.2)	BET1L (2.0)	ENSG00000226403 (1.9)	KDELC2 (1.8)	SYNE1 (1.6)	DMRT1 (1.5)	COG6 (1.4)	SALL1 (1.4)	WNT4 (1.3)
ENSG00000135679	MDM2 PPI subnetwork	0.02	0.900598	TNRC6B (3.7)	UIMC1 (3.3)	CDC42-IT1 (1.8)	CDC42 (1.4)	GREB1 (1.3)	RIC8A (1.2)	NPAT (1.2)	SLC38A2 (1.1)	LINC00339 (1.1)	ENSG00000228397 (1.0)
ENSG00000105610	KLF1 PPI subnetwork	0.02	0.900598	TNRC6B (2.6)	FIP1L1 (2.6)	ENSG00000228397 (2.2)	COG6 (1.6)	FOXO1 (1.3)	CDC42 (1.0)	OBFC1 (1.0)	LNX1 (1.0)	SULT1B1 (1.0)	SLC38A2 (0.9)
GO:0000793	condensed chromosome	0.02	0.900598	NPAT (2.3)	KDELC2 (1.9)	ATM (1.9)	ZNF346 (1.7)	UIMC1 (1.4)	FIP1L1 (1.4)	TERT (1.3)	CUL5 (1.1)	ENSG00000226403 (0.8)	ACAT1 (0.8)
ENSG00000100726	TELO2 PPI subnetwork	0.02	0.900598	CUL5 (3.0)	TNRC6B (2.9)	ACAT1 (2.6)	MRPS31 (2.2)	EXPH5 (1.9)	COG6 (1.9)	LRRC31 (1.6)	ATM (1.4)	PSMD13 (1.4)	DMRT1 (1.2)
GO:0006412	translation	0.02	0.900598	MRPS31 (2.7)	SLC38A1 (2.0)	OBFC1 (1.7)	RIC8A (1.3)	DMRT1 (1.2)	WT1-AS (1.2)	SIRT3 (1.0)	UIMC1 (1.0)	SLC38A2 (1.0)	TERT (0.9)
ENSG00000132780	NASP PPI subnetwork	0.02	0.900598	ENSG00000228397 (3.3)	ODF3 (2.2)	FIP1L1 (1.6)	LRRC34 (1.6)	KANK1 (1.4)	WT1-AS (1.3)	FOXO1 (1.2)	CD44 (1.2)	EXPH5 (1.1)	CDC42-IT1 (0.9)
GO:0010564	regulation of cell cycle process	0.02	0.900598	NPAT (2.8)	ZNF346 (2.7)	KDELC2 (2.4)	UIMC1 (1.9)	FIP1L1 (1.8)	CUL5 (1.7)	MRPS31 (1.7)	PSMD13 (1.5)	ATM (1.3)	TERT (1.2)
ENSG00000148835	TAF5 PPI subnetwork	0.02	0.900598	FIP1L1 (2.4)	MRPS31 (2.4)	RIC8A (2.4)	CUL5 (2.2)	ATM (2.1)	SCGB1C1 (2.0)	DMRT1 (1.8)	TNRC6B (1.7)	SIRT3 (1.6)	PSMD13 (1.6)
GO:0006303	double-strand break repair via nonhomologous end joining	0.02	0.900598	OBFC1 (3.5)	ATM (3.5)	LINC00339 (2.4)	NPAT (2.0)	KDELC2 (1.9)	MRPS31 (1.9)	SYNE1 (1.8)	TNRC6B (1.4)	COG6 (1.4)	LRRC34 (1.3)
ENSG00000121892	PDS5A PPI subnetwork	0.02	0.900598	MYNN (3.7)	NPAT (3.3)	CUL5 (3.0)	FIP1L1 (2.3)	OBFC1 (2.2)	SYNE1 (2.1)	ATM (2.0)	SLC38A1 (1.9)	SLC38A2 (1.7)	ACAT1 (1.6)
ENSG00000105369	CD79A PPI subnetwork	0.02	0.900598	SLC38A1 (3.2)	TERT (2.7)	HK3 (2.0)	LRRC34 (1.9)	ATM (1.7)	FOXO1 (1.2)	KANK1 (1.1)	SULT1B1 (1.0)	SLC25A15 (0.9)	ENSG00000258096 (0.9)
REACTOME_CELL_CYCLE_CHECKPOINTS	REACTOME_CELL_CYCLE_CHECKPOINTS	0.02	0.900598	PSMD13 (4.1)	NPAT (2.5)	MRPS31 (2.3)	UIMC1 (1.2)	OBFC1 (1.2)	MYNN (1.2)	CDC42 (1.2)	LINC00339 (1.1)	KDELC2 (1.0)	ENSG00000228397 (1.0)
ENSG00000177602	GSG2 PPI subnetwork	0.02	0.900598	PSMD13 (2.4)	OBFC1 (2.3)	ACAT1 (1.9)	ATM (1.9)	MYNN (1.8)	SLC38A2 (1.8)	SLC38A1 (1.8)	COG6 (1.7)	MRPS31 (1.2)	SCGB1C1 (1.1)
GO:0000086	G2/M transition of mitotic cell cycle	0.02	0.900598	ZNF346 (3.2)	OBFC1 (2.8)	CDC42-IT1 (2.6)	NPAT (2.3)	UIMC1 (2.0)	TERT (1.9)	ENSG00000226403 (1.5)	FIP1L1 (1.4)	LRRC34 (1.4)	ATM (1.3)
GO:0000781	chromosome, telomeric region	0.02	0.900598	NPAT (4.3)	OBFC1 (2.9)	ATM (2.8)	TERT (2.4)	CUL5 (2.0)	ENSG00000228397 (1.8)	UIMC1 (1.8)	TNRC6B (1.7)	KDELC2 (1.4)	FIP1L1 (1.4)
GO:0000783	nuclear telomere cap complex	0.02	0.900598	OBFC1 (2.7)	SYNE1 (2.3)	TNRC6B (1.6)	FIP1L1 (1.5)	SLC38A1 (1.5)	TERT (1.4)	ENSG00000228397 (1.3)	ZNF346 (1.0)	NPAT (1.0)	ATM (1.0)
GO:0000782	telomere cap complex	0.02	0.900598	OBFC1 (2.7)	SYNE1 (2.3)	TNRC6B (1.6)	FIP1L1 (1.5)	SLC38A1 (1.5)	TERT (1.4)	ENSG00000228397 (1.3)	ZNF346 (1.0)	NPAT (1.0)	ATM (1.0)
ENSG00000163349	HIPK1 PPI subnetwork	0.02	0.900598	LRRC31 (3.4)	CUL5 (3.0)	COG6 (2.9)	ODF3 (2.6)	ATM (2.0)	LRRC34 (1.9)	TNRC6B (1.6)	SLC38A2 (1.5)	MYNN (1.4)	LNX1 (1.4)
MP:0011427	mesangial cell hyperplasia	0.02	0.900598	WT1-AS (8.6)	SYNE1 (2.9)	WNT4 (2.4)	ENSG00000226403 (2.2)	SULT1B1 (1.8)	ENSG00000258096 (1.4)	OBFC1 (1.3)	UIMC1 (1.3)	DMRT1 (1.2)	CD44 (1.0)
ENSG00000092330	TINF2 PPI subnetwork	0.02	0.900598	TNRC6B (1.9)	UIMC1 (1.8)	ZNF346 (1.7)	ENSG00000228397 (1.5)	NPAT (1.4)	C11orf65 (1.3)	SYNE1 (1.3)	OBFC1 (1.3)	FIP1L1 (1.2)	ENSG00000258096 (1.2)
GO:0071222	cellular response to lipopolysaccharide	0.02	0.900598	SULT1B1 (1.9)	CDC42-IT1 (1.5)	GREB1 (1.5)	DMRT1 (1.3)	HK3 (1.3)	LNX1 (1.2)	CD44 (1.2)	LRRC34 (1.1)	ENSG00000184378 (0.9)	FOXO1 (0.8)
ENSG00000129282	MRM1 PPI subnetwork	0.02	0.900598	COG6 (3.7)	BET1L (3.7)	CUL5 (3.7)	ACAT1 (3.6)	MRPS31 (2.2)	ATM (2.2)	TERT (1.8)	RIC8A (1.8)	PSMD13 (1.7)	NPAT (1.7)
GO:0051053	negative regulation of DNA metabolic process	0.02	0.900598	ATM (3.5)	NPAT (2.9)	TERT (2.8)	MYNN (2.1)	KDELC2 (2.1)	ENSG00000228397 (2.0)	UIMC1 (1.9)	FIP1L1 (1.8)	OBFC1 (1.8)	ZNF346 (1.8)
ENSG00000141384	TAF4B PPI subnetwork	0.02	0.900598	RIC8A (3.0)	MYNN (2.7)	MRPS31 (2.6)	FIP1L1 (2.4)	BET1L (2.4)	UIMC1 (2.3)	DMRT1 (2.0)	FOXO1 (2.0)	GREB1 (1.9)	NPAT (1.4)
ENSG00000127947	PTPN12 PPI subnetwork	0.02	0.900598	KANK1 (2.4)	SYNE1 (2.2)	OBFC1 (2.1)	SLC38A1 (1.9)	COG6 (1.8)	SLC38A2 (1.6)	ATM (1.4)	UIMC1 (1.3)	HK3 (1.2)	WNT4 (1.0)
ENSG00000073614	KDM5A PPI subnetwork	0.02	0.900598	UIMC1 (2.2)	FIP1L1 (2.2)	DMRT1 (2.0)	ENSG00000226403 (2.0)	SLC25A15 (2.0)	MRPS31 (1.7)	CDC42-IT1 (1.7)	SALL1 (1.5)	FOXO1 (1.2)	TNRC6B (1.0)
ENSG00000124802	EEF1E1 PPI subnetwork	0.02	0.900598	ATM (3.1)	SLC38A2 (2.0)	SLC38A1 (1.8)	RIC8A (1.6)	NPAT (1.6)	CUL5 (1.5)	MRPS31 (1.4)	ACAT1 (1.3)	COG6 (1.3)	LINC00339 (1.3)
GO:0004364	glutathione transferase activity	0.02	0.900598	OBFC1 (2.8)	C11orf65 (2.5)	LNX1 (2.3)	EXPH5 (2.1)	SYNE1 (1.9)	KDELC2 (1.8)	ACAT1 (1.7)	ODF3 (1.4)	SH3PXD2A (1.3)	LRRC34 (1.3)
ENSG00000214026	MRPL23 PPI subnetwork	0.02	0.900598	BET1L (2.3)	MRPS31 (2.1)	RIC8A (2.1)	SIRT3 (1.9)	SLC38A2 (1.9)	ACAT1 (1.9)	COG6 (1.8)	TERT (1.8)	MYNN (1.5)	SLC25A15 (1.5)
MP:0005159	azoospermia	0.02	0.900598	DMRT1 (5.5)	ENSG00000226403 (2.9)	WT1-AS (2.6)	ODF3 (2.4)	C11orf65 (2.3)	UIMC1 (1.9)	SALL1 (1.9)	LRRC31 (1.8)	TNRC6B (1.4)	LRRC34 (1.4)
MP:0004016	decreased bone mass	0.02	0.900598	GREB1 (3.3)	KANK1 (2.1)	SH3PXD2A (1.8)	SLC25A15 (1.6)	SULT1B1 (1.5)	FOXO1 (1.5)	COG6 (1.4)	TNRC6B (1.3)	WT1-AS (1.1)	SLC38A2 (0.9)
MP:0005169	abnormal male meiosis	0.02	0.900598	DMRT1 (4.1)	C11orf65 (3.3)	UIMC1 (2.4)	ENSG00000226403 (2.3)	ZNF346 (2.1)	KDELC2 (1.3)	NPAT (1.2)	COG6 (1.1)	ENSG00000184378 (1.0)	LRRC34 (0.9)
ENSG00000177951	BET1L PPI subnetwork	0.02	0.900598	BET1L (6.3)	COG6 (5.4)	ACAT1 (2.9)	CUL5 (2.5)	RIC8A (2.3)	ATM (2.3)	LINC00339 (2.1)	PSMD13 (1.6)	MYNN (1.5)	KDELC2 (1.2)
GO:0032259	methylation	0.02	0.900598	TERT (2.6)	C11orf65 (2.4)	UIMC1 (2.1)	DMRT1 (1.9)	CUL5 (1.9)	NPAT (1.6)	ENSG00000226403 (1.6)	TNRC6B (1.4)	RIC8A (1.3)	ZNF346 (1.3)
GO:0003209	cardiac atrium morphogenesis	0.02	0.900598	ENSG00000226403 (2.3)	ODF3 (1.6)	GREB1 (1.5)	SIRT3 (1.5)	ENSG00000228397 (1.4)	ENSG00000184378 (1.2)	SLC25A15 (1.1)	WT1-AS (0.9)	ZNF346 (0.8)	CDC42-IT1 (0.7)
ENSG00000128833	MYO5C PPI subnetwork	0.02	0.900598	PSMD13 (2.4)	OBFC1 (2.1)	ACAT1 (2.0)	SLC38A2 (1.9)	ATM (1.8)	MYNN (1.8)	COG6 (1.7)	SLC38A1 (1.6)	MRPS31 (1.3)	SCGB1C1 (1.0)
ENSG00000134255	CEPT1 PPI subnetwork	0.02	0.900598	PSMD13 (2.4)	OBFC1 (2.2)	ATM (1.9)	ACAT1 (1.9)	SLC38A2 (1.8)	MYNN (1.8)	SLC38A1 (1.7)	COG6 (1.7)	MRPS31 (1.2)	SCGB1C1 (1.0)
ENSG00000166508	MCM7 PPI subnetwork	0.02	0.900598	NPAT (3.9)	OBFC1 (3.1)	UIMC1 (2.4)	MRPS31 (2.1)	SLC38A2 (1.9)	ATM (1.5)	ACAT1 (1.3)	FIP1L1 (1.3)	SYNE1 (1.0)	MYNN (1.0)
ENSG00000113522	RAD50 PPI subnetwork	0.02	0.900598	NPAT (4.2)	ATM (3.1)	OBFC1 (2.4)	KDELC2 (2.4)	FIP1L1 (2.2)	UIMC1 (1.9)	TERT (1.8)	ENSG00000184378 (1.5)	TNRC6B (1.4)	DMRT1 (1.3)
GO:0007127	meiosis I	0.02	0.900598	DMRT1 (4.2)	ATM (3.0)	ZNF346 (2.8)	C11orf65 (2.5)	NPAT (2.0)	UIMC1 (1.9)	ENSG00000226403 (1.9)	COG6 (1.7)	KDELC2 (1.7)	LRRC34 (1.7)
MP:0001689	incomplete somite formation	0.02	0.900598	TNRC6B (2.8)	NPAT (2.7)	ATM (2.2)	SLC38A1 (2.1)	SALL1 (2.1)	SYNE1 (2.0)	SLC38A2 (2.0)	SH3PXD2A (1.9)	UIMC1 (1.6)	TERT (1.4)
REACTOME_HOMOLOGOUS_RECOMBINATION_REPAIR_OF_REPLICATION:INDEPENDENT_DOUBLE:STRAND_BREAKS	REACTOME_HOMOLOGOUS_RECOMBINATION_REPAIR_OF_REPLICATION:INDEPENDENT_DOUBLE:STRAND_BREAKS	0.02	0.900598	NPAT (5.2)	TERT (3.2)	KDELC2 (2.8)	OBFC1 (2.7)	ATM (2.5)	UIMC1 (2.0)	LINC00339 (1.8)	MRPS31 (1.6)	SIRT3 (1.1)	CDC42-IT1 (1.1)
REACTOME_HOMOLOGOUS_RECOMBINATION_REPAIR	REACTOME_HOMOLOGOUS_RECOMBINATION_REPAIR	0.02	0.900598	NPAT (5.2)	TERT (3.2)	KDELC2 (2.8)	OBFC1 (2.7)	ATM (2.5)	UIMC1 (2.0)	LINC00339 (1.8)	MRPS31 (1.6)	SIRT3 (1.1)	CDC42-IT1 (1.1)
ENSG00000130312	MRPL34 PPI subnetwork	0.02	0.900598	MRPS31 (2.8)	MYNN (2.5)	BET1L (2.0)	PSMD13 (2.0)	SLC25A15 (1.9)	OBFC1 (1.7)	WT1-AS (1.6)	TERT (1.4)	LINC00339 (1.3)	FOXO1 (1.2)
GO:0042054	histone methyltransferase activity	0.02	0.900598	ZNF346 (2.9)	UIMC1 (2.9)	TNRC6B (2.5)	NPAT (2.1)	ATM (2.1)	SH3PXD2A (2.0)	DMRT1 (1.9)	TERT (1.5)	FIP1L1 (0.9)	WT1-AS (0.9)
MP:0002666	increased circulating aldosterone level	0.02	0.900598	SULT1B1 (2.4)	WNT4 (2.3)	EXPH5 (1.7)	GREB1 (1.5)	SYNE1 (1.4)	FOXO1 (1.3)	LNX1 (1.3)	ENSG00000226403 (1.2)	LINC00339 (1.0)	TERT (1.0)
ENSG00000173511	VEGFB PPI subnetwork	0.02	0.900598	HK3 (3.3)	SLC38A2 (2.4)	MYNN (1.9)	SULT1B1 (1.6)	LRRC31 (1.5)	GREB1 (1.4)	SYNE1 (1.3)	LNX1 (1.1)	ENSG00000228397 (1.0)	SH3PXD2A (1.0)
ENSG00000113456	RAD1 PPI subnetwork	0.02	0.900598	NPAT (3.6)	PSMD13 (2.3)	MRPS31 (2.1)	ENSG00000258096 (2.0)	ENSG00000228397 (2.0)	UIMC1 (1.8)	ATM (1.6)	GREB1 (1.6)	DMRT1 (1.5)	MYNN (1.3)
MP:0005407	hyperalgesia	0.02	0.900598	WT1-AS (1.9)	LRRC31 (1.9)	ENSG00000226403 (1.6)	LNX1 (1.6)	TERT (1.5)	SALL1 (1.5)	DMRT1 (1.3)	LINC00339 (1.1)	SULT1B1 (0.9)	FIP1L1 (0.9)
GO:0000795	synaptonemal complex	0.02	0.900598	DMRT1 (3.5)	ATM (1.9)	UIMC1 (1.6)	C11orf65 (1.4)	TERT (1.2)	KDELC2 (1.2)	COG6 (1.2)	NPAT (1.1)	FIP1L1 (1.0)	SLC25A15 (0.9)
ENSG00000066117	SMARCD1 PPI subnetwork	0.02	0.900598	CUL5 (2.6)	SALL1 (1.8)	RIC8A (1.7)	FIP1L1 (1.5)	CDC42-IT1 (1.4)	MRPS31 (1.3)	GREB1 (1.3)	WNT4 (1.3)	ENSG00000184378 (1.2)	TNRC6B (1.2)
ENSG00000105364	MRPL4 PPI subnetwork	0.02	0.900598	FIP1L1 (2.3)	PSMD13 (2.2)	MRPS31 (2.0)	TERT (1.8)	COG6 (1.8)	ATM (1.7)	RIC8A (1.7)	DMRT1 (1.7)	ACAT1 (1.5)	BET1L (1.2)
ENSG00000197961	ZNF121 PPI subnetwork	0.02	0.900598	PSMD13 (2.4)	OBFC1 (2.2)	ACAT1 (2.0)	ATM (1.8)	SLC38A2 (1.8)	MYNN (1.8)	COG6 (1.7)	SLC38A1 (1.7)	MRPS31 (1.2)	SCGB1C1 (1.1)
ENSG00000169714	CNBP PPI subnetwork	0.03	0.900598	TNRC6B (1.9)	SH3PXD2A (1.7)	UIMC1 (1.5)	KDELC2 (1.5)	MRPS31 (1.3)	CD44 (1.2)	CDC42 (1.2)	TERT (1.2)	ATM (1.1)	MYNN (1.0)
GO:0035258	steroid hormone receptor binding	0.03	0.900598	GREB1 (3.7)	TNRC6B (3.4)	WNT4 (2.4)	WT1-AS (2.2)	CDC42-IT1 (1.6)	FOXO1 (1.5)	FIP1L1 (1.5)	SLC38A1 (1.4)	SLC38A2 (1.4)	LINC00339 (1.0)
GO:0032365	intracellular lipid transport	0.03	0.900598	ENSG00000228397 (2.4)	LINC00339 (2.3)	CUL5 (1.9)	TERT (1.8)	SH3PXD2A (1.8)	FOXO1 (1.6)	SLC25A15 (1.6)	C11orf65 (1.6)	BET1L (1.5)	ACAT1 (1.5)
MP:0005023	abnormal wound healing	0.03	0.900598	CD44 (3.0)	HK3 (1.8)	SULT1B1 (1.6)	SH3PXD2A (1.4)	SLC38A2 (1.3)	WT1-AS (1.2)	SALL1 (1.0)	WNT4 (1.0)	SYNE1 (1.0)	DMRT1 (0.9)
MP:0004852	decreased testis weight	0.03	0.900598	DMRT1 (7.7)	UIMC1 (1.8)	GREB1 (1.7)	C11orf65 (1.6)	SALL1 (1.6)	LRRC34 (1.4)	FOXO1 (1.4)	NPAT (1.2)	SLC25A15 (1.2)	ENSG00000226403 (1.1)
KEGG_CELL_CYCLE	KEGG_CELL_CYCLE	0.03	0.900598	NPAT (3.4)	KDELC2 (2.2)	SLC38A2 (1.6)	UIMC1 (1.6)	TERT (1.4)	FIP1L1 (1.1)	ACAT1 (0.9)	OBFC1 (0.9)	LINC00339 (0.9)	FOXO1 (0.8)
ENSG00000186298	PPP1CC PPI subnetwork	0.03	0.900598	CDC42-IT1 (2.0)	NPAT (1.7)	CUL5 (1.2)	RIC8A (1.1)	ACAT1 (1.0)	PSMD13 (1.0)	KDELC2 (1.0)	FIP1L1 (0.9)	SIRT3 (0.8)	MRPS31 (0.8)
ENSG00000165392	WRN PPI subnetwork	0.03	0.900598	NPAT (3.0)	FIP1L1 (1.9)	CDC42-IT1 (1.8)	SLC38A1 (1.7)	MYNN (1.5)	ATM (1.5)	OBFC1 (1.3)	TNRC6B (1.1)	SLC38A2 (1.1)	KDELC2 (1.1)
GO:0051321	meiotic cell cycle	0.03	0.900598	DMRT1 (4.1)	C11orf65 (2.9)	NPAT (2.5)	ZNF346 (2.2)	LRRC34 (2.2)	ATM (2.2)	UIMC1 (1.9)	ENSG00000226403 (1.9)	KDELC2 (1.6)	COG6 (1.4)
ENSG00000114166	KAT2B PPI subnetwork	0.03	0.900598	TNRC6B (3.6)	FOXO1 (2.1)	FIP1L1 (2.1)	SCGB1C1 (2.0)	ENSG00000228397 (1.7)	ATM (1.5)	DMRT1 (1.5)	UIMC1 (1.4)	NPAT (1.2)	SYNE1 (1.1)
MP:0008828	abnormal lymph node cell ratio	0.03	0.900598	GREB1 (2.2)	SLC38A1 (2.0)	SALL1 (1.2)	FOXO1 (1.2)	TNRC6B (1.1)	CD44 (1.0)	SLC25A15 (1.0)	KANK1 (1.0)	HK3 (1.0)	RIC8A (1.0)
ENSG00000120656	TAF12 PPI subnetwork	0.03	0.900598	FIP1L1 (3.2)	DMRT1 (2.7)	UIMC1 (2.2)	CUL5 (2.0)	BET1L (2.0)	ATM (1.9)	MRPS31 (1.9)	NPAT (1.7)	CDC42-IT1 (1.6)	RIC8A (1.4)
ENSG00000134574	DDB2 PPI subnetwork	0.03	0.900598	ZNF346 (4.0)	ATM (2.9)	TNRC6B (2.4)	LINC00339 (2.4)	OBFC1 (2.1)	UIMC1 (2.0)	KDELC2 (2.0)	BET1L (1.9)	MYNN (1.8)	NPAT (1.7)
GO:0005657	replication fork	0.03	0.900598	NPAT (4.4)	ATM (2.5)	MRPS31 (2.1)	OBFC1 (1.9)	KDELC2 (1.8)	LINC00339 (1.7)	UIMC1 (1.3)	SLC38A2 (1.2)	TERT (1.2)	ACAT1 (1.0)
ENSG00000175054	ATR PPI subnetwork	0.03	0.900598	NPAT (3.9)	ATM (2.5)	ENSG00000228397 (2.1)	UIMC1 (1.8)	OBFC1 (1.8)	DMRT1 (1.6)	ZNF346 (1.5)	KDELC2 (1.5)	CUL5 (1.5)	TERT (1.5)
ENSG00000117000	RLF PPI subnetwork	0.03	0.900598	TNRC6B (2.8)	ENSG00000228397 (2.0)	ZNF346 (2.0)	EXPH5 (1.8)	SYNE1 (1.7)	CDC42-IT1 (1.6)	FOXO1 (1.6)	BET1L (1.6)	ENSG00000258096 (1.2)	GREB1 (1.1)
KEGG_NON_HOMOLOGOUS_END_JOINING	KEGG_NON_HOMOLOGOUS_END_JOINING	0.03	0.900598	OBFC1 (4.6)	TERT (3.1)	ATM (2.8)	FOXO1 (2.7)	NPAT (2.3)	TNRC6B (2.0)	UIMC1 (1.5)	SYNE1 (1.4)	MRPS31 (1.4)	CUL5 (1.3)
GO:0000932	cytoplasmic mRNA processing body	0.03	0.900598	RIC8A (2.1)	TNRC6B (2.0)	BET1L (1.8)	GREB1 (1.6)	TERT (1.6)	CDC42 (1.6)	DMRT1 (1.3)	UIMC1 (1.0)	ENSG00000258096 (0.9)	FIP1L1 (0.8)
MP:0008813	decreased common myeloid progenitor cell number	0.03	0.900598	SLC38A1 (2.3)	SLC25A15 (2.2)	TERT (1.9)	ODF3 (1.7)	EXPH5 (1.7)	NPAT (1.7)	ATM (1.6)	MRPS31 (1.6)	LRRC34 (1.6)	TNRC6B (1.4)
GO:0043414	macromolecule methylation	0.03	0.900598	TERT (2.6)	C11orf65 (2.5)	UIMC1 (2.3)	CUL5 (2.1)	DMRT1 (1.9)	NPAT (1.7)	ENSG00000226403 (1.6)	ZNF346 (1.6)	TNRC6B (1.4)	RIC8A (1.3)
KEGG_CYSTEINE_AND_METHIONINE_METABOLISM	KEGG_CYSTEINE_AND_METHIONINE_METABOLISM	0.03	0.900598	SLC25A15 (3.0)	SLC38A2 (2.8)	ACAT1 (2.7)	ENSG00000226403 (1.9)	SCGB1C1 (1.4)	ENSG00000184378 (1.2)	SALL1 (1.1)	SIRT3 (1.0)	LRRC34 (1.0)	C11orf65 (0.9)
GO:0071371	cellular response to gonadotropin stimulus	0.03	0.900598	WT1-AS (6.2)	DMRT1 (4.1)	ODF3 (2.7)	GREB1 (1.8)	WNT4 (1.3)	SLC25A15 (1.1)	MRPS31 (0.9)	SULT1B1 (0.9)	C11orf65 (0.8)	ZNF346 (0.6)
ENSG00000198001	IRAK4 PPI subnetwork	0.03	0.900598	SULT1B1 (2.7)	WT1-AS (2.5)	SALL1 (2.4)	TERT (1.9)	HK3 (1.5)	LINC00339 (1.2)	LNX1 (1.1)	CDC42-IT1 (1.0)	SLC38A1 (0.9)	LRRC31 (0.8)
ENSG00000138376	BARD1 PPI subnetwork	0.03	0.900598	NPAT (3.1)	FIP1L1 (2.5)	CUL5 (1.8)	TERT (1.3)	ATM (1.1)	KDELC2 (1.1)	LNX1 (1.1)	OBFC1 (1.0)	WNT4 (1.0)	EXPH5 (1.0)
ENSG00000148297	MED22 PPI subnetwork	0.03	0.900598	MRPS31 (2.8)	MYNN (2.2)	CUL5 (2.0)	NPAT (2.0)	BET1L (1.8)	UIMC1 (1.6)	COG6 (1.6)	ZNF346 (1.3)	FIP1L1 (1.3)	ODF3 (1.1)
ENSG00000036257	CUL3 PPI subnetwork	0.03	0.900598	CUL5 (3.1)	MYNN (2.7)	LINC00339 (2.2)	LNX1 (1.7)	ZNF346 (1.7)	SYNE1 (1.7)	UIMC1 (1.6)	PSMD13 (1.6)	OBFC1 (1.4)	NPAT (1.3)
MP:0002023	B cell derived lymphoma	0.03	0.900598	NPAT (3.2)	ATM (2.6)	FOXO1 (2.5)	LINC00339 (2.0)	ENSG00000228397 (1.9)	ACAT1 (1.7)	WNT4 (1.7)	TERT (1.3)	ENSG00000184378 (1.2)	SLC38A1 (1.2)
MP:0003436	decreased susceptibility to induced arthritis	0.03	0.900598	HK3 (4.3)	SULT1B1 (2.5)	SLC38A1 (2.0)	SLC38A2 (1.5)	CD44 (1.3)	DMRT1 (1.0)	LNX1 (0.9)	EXPH5 (0.8)	CDC42-IT1 (0.8)	KANK1 (0.8)
GO:0031514	motile cilium	0.03	0.900598	LRRC34 (4.3)	SIRT3 (2.6)	LINC00339 (2.0)	OBFC1 (1.8)	C11orf65 (1.4)	TNRC6B (1.4)	SCGB1C1 (1.3)	ATM (1.2)	EXPH5 (1.1)	CUL5 (1.0)
ENSG00000121022	COPS5 PPI subnetwork	0.03	0.900598	COG6 (3.3)	MRPS31 (2.4)	MYNN (2.4)	CD44 (1.9)	CDC42 (1.9)	SLC38A2 (1.2)	PSMD13 (1.2)	UIMC1 (1.1)	ENSG00000184378 (1.0)	LRRC31 (1.0)
MP:0001924	infertility	0.03	0.900598	ODF3 (2.3)	DMRT1 (2.2)	ENSG00000258096 (2.1)	ENSG00000228397 (2.0)	LRRC34 (2.0)	SALL1 (1.8)	SH3PXD2A (1.5)	WNT4 (1.4)	KANK1 (1.4)	SYNE1 (1.3)
ENSG00000170260	ZNF212 PPI subnetwork	0.03	0.900598	SLC38A2 (2.2)	WT1-AS (1.7)	FIP1L1 (1.6)	MYNN (1.5)	CDC42-IT1 (1.0)	RIC8A (1.0)	NPAT (1.0)	DMRT1 (1.0)	SALL1 (0.9)	KANK1 (0.9)
ENSG00000117222	RBBP5 PPI subnetwork	0.03	0.900598	UIMC1 (3.0)	MRPS31 (2.4)	NPAT (2.2)	LINC00339 (2.2)	TNRC6B (1.5)	COG6 (1.4)	ATM (1.1)	TERT (0.9)	CDC42 (0.9)	ZNF346 (0.8)
ENSG00000130956	HABP4 PPI subnetwork	0.03	0.900598	OBFC1 (2.1)	TERT (2.0)	SLC38A2 (1.7)	UIMC1 (1.2)	KANK1 (1.2)	SYNE1 (1.1)	SH3PXD2A (0.9)	RIC8A (0.9)	LINC00339 (0.9)	NPAT (0.8)
GO:0051327	M phase of meiotic cell cycle	0.03	0.900598	DMRT1 (4.2)	C11orf65 (2.9)	NPAT (2.4)	LRRC34 (2.3)	ZNF346 (2.3)	ATM (2.2)	UIMC1 (2.0)	ENSG00000226403 (1.9)	KDELC2 (1.7)	COG6 (1.4)
GO:0007126	meiosis	0.03	0.900598	DMRT1 (4.2)	C11orf65 (2.9)	NPAT (2.4)	LRRC34 (2.3)	ZNF346 (2.3)	ATM (2.2)	UIMC1 (2.0)	ENSG00000226403 (1.9)	KDELC2 (1.7)	COG6 (1.4)
GO:0016279	protein-lysine N-methyltransferase activity	0.03	0.900598	UIMC1 (3.5)	TNRC6B (2.8)	DMRT1 (2.2)	ZNF346 (2.0)	NPAT (1.9)	ATM (1.8)	TERT (1.3)	COG6 (1.2)	FOXO1 (1.0)	WT1-AS (1.0)
GO:0016278	lysine N-methyltransferase activity	0.03	0.900598	UIMC1 (3.5)	TNRC6B (2.8)	DMRT1 (2.2)	ZNF346 (2.0)	NPAT (1.9)	ATM (1.8)	TERT (1.3)	COG6 (1.2)	FOXO1 (1.0)	WT1-AS (1.0)
GO:0004709	MAP kinase kinase kinase activity	0.03	0.900598	UIMC1 (2.4)	CD44 (2.2)	LNX1 (2.2)	ENSG00000258096 (1.6)	DMRT1 (1.5)	KANK1 (1.4)	FOXO1 (1.4)	SIRT3 (1.3)	EXPH5 (1.2)	ENSG00000228397 (1.2)
GO:0070613	regulation of protein processing	0.03	0.900598	C11orf65 (2.5)	ENSG00000226403 (2.3)	ODF3 (2.2)	ENSG00000228397 (1.5)	COG6 (1.4)	SLC38A2 (1.4)	ENSG00000184378 (1.3)	ENSG00000258096 (1.3)	SIRT3 (1.2)	LRRC31 (0.9)
GO:0006281	DNA repair	0.03	0.900598	NPAT (3.3)	OBFC1 (3.1)	ATM (2.8)	TERT (2.7)	UIMC1 (2.5)	ZNF346 (2.3)	FIP1L1 (2.2)	MRPS31 (2.1)	MYNN (2.1)	KDELC2 (1.9)
GO:0007595	lactation	0.03	0.900598	TERT (2.3)	ENSG00000228397 (1.5)	SLC25A15 (1.4)	DMRT1 (1.3)	EXPH5 (1.2)	GREB1 (1.2)	ENSG00000184378 (1.1)	ODF3 (1.0)	LNX1 (1.0)	WT1-AS (0.8)
MP:0002657	chondrodystrophy	0.03	0.900598	GREB1 (3.2)	KANK1 (2.5)	FOXO1 (2.4)	SH3PXD2A (2.0)	SYNE1 (1.9)	BET1L (1.9)	SULT1B1 (1.6)	LRRC31 (1.3)	SALL1 (1.2)	COG6 (1.1)
ENSG00000100311	PDGFB PPI subnetwork	0.03	0.900598	HK3 (2.6)	SULT1B1 (2.2)	WNT4 (2.1)	SH3PXD2A (1.9)	MYNN (1.9)	SLC38A2 (1.8)	LRRC31 (1.6)	GREB1 (1.4)	LNX1 (1.2)	C11orf65 (1.2)
GO:0007281	germ cell development	0.03	0.900598	ODF3 (5.1)	C11orf65 (3.6)	DMRT1 (3.4)	LRRC34 (2.8)	ENSG00000184378 (2.0)	ZNF346 (1.2)	WT1-AS (1.2)	GREB1 (1.0)	BET1L (1.0)	ENSG00000226403 (0.9)
ENSG00000120008	WDR11 PPI subnetwork	0.03	0.900598	CUL5 (4.0)	LINC00339 (2.9)	MYNN (2.8)	ZNF346 (2.4)	ATM (2.2)	NPAT (2.1)	SLC38A2 (2.0)	UIMC1 (1.6)	TNRC6B (1.2)	EXPH5 (1.2)
ENSG00000155229	MMS19 PPI subnetwork	0.03	0.900598	PSMD13 (4.7)	ZNF346 (2.5)	CDC42 (2.1)	ACAT1 (1.9)	MRPS31 (1.7)	RIC8A (1.4)	CUL5 (1.0)	MYNN (1.0)	NPAT (0.9)	OBFC1 (0.6)
MP:0008597	decreased circulating interleukin-6 level	0.03	0.900598	HK3 (2.4)	CD44 (2.2)	KANK1 (2.1)	LNX1 (1.3)	EXPH5 (1.1)	SLC38A1 (1.0)	RIC8A (1.0)	TERT (0.9)	ODF3 (0.8)	WT1-AS (0.7)
ENSG00000104267	CA2 PPI subnetwork	0.03	0.900598	TERT (2.6)	ACAT1 (2.4)	CDC42-IT1 (2.3)	SLC38A1 (1.8)	OBFC1 (1.8)	SYNE1 (1.3)	SIRT3 (1.2)	ENSG00000228397 (1.2)	LNX1 (1.2)	NPAT (1.1)
ENSG00000168924	LETM1 PPI subnetwork	0.03	0.900598	MRPS31 (3.2)	SIRT3 (2.7)	SLC25A15 (2.2)	ACAT1 (2.1)	PSMD13 (1.6)	GREB1 (1.4)	SH3PXD2A (1.3)	WT1-AS (1.1)	EXPH5 (1.1)	LRRC34 (1.0)
REACTOME_CHROMOSOME_MAINTENANCE	REACTOME_CHROMOSOME_MAINTENANCE	0.03	0.900598	NPAT (3.3)	ATM (2.6)	OBFC1 (1.9)	KDELC2 (1.7)	UIMC1 (1.5)	DMRT1 (1.3)	SCGB1C1 (1.1)	ENSG00000228397 (1.1)	C11orf65 (0.9)	FIP1L1 (0.7)
ENSG00000141456	ENSG00000141456 PPI subnetwork	0.03	0.900598	TNRC6B (3.4)	DMRT1 (2.9)	FOXO1 (2.1)	ZNF346 (1.6)	TERT (1.6)	UIMC1 (1.5)	NPAT (1.4)	MRPS31 (1.2)	LINC00339 (1.1)	COG6 (1.1)
GO:0016591	DNA-directed RNA polymerase II, holoenzyme	0.03	0.900598	MRPS31 (4.1)	RIC8A (3.0)	FIP1L1 (2.3)	OBFC1 (2.1)	PSMD13 (2.0)	DMRT1 (1.9)	ATM (1.6)	MYNN (1.5)	SLC25A15 (1.5)	COG6 (1.5)
ENSG00000159259	CHAF1B PPI subnetwork	0.03	0.900598	ENSG00000228397 (3.7)	FIP1L1 (2.4)	NPAT (2.0)	TNRC6B (1.9)	TERT (1.5)	DMRT1 (1.5)	LNX1 (1.0)	C11orf65 (0.9)	ZNF346 (0.9)	SYNE1 (0.7)
KEGG_RNA_POLYMERASE	KEGG_RNA_POLYMERASE	0.03	0.900598	ATM (2.0)	BET1L (1.8)	SLC25A15 (1.6)	KANK1 (1.5)	ZNF346 (1.5)	RIC8A (1.4)	PSMD13 (1.3)	ENSG00000184378 (1.1)	WNT4 (1.1)	SCGB1C1 (1.0)
GO:0043189	H4/H2A histone acetyltransferase complex	0.03	0.900598	MYNN (2.4)	MRPS31 (2.0)	SYNE1 (1.8)	UIMC1 (1.7)	FIP1L1 (1.7)	COG6 (1.3)	KDELC2 (1.3)	C11orf65 (1.2)	ODF3 (1.1)	DMRT1 (1.1)
ENSG00000138798	EGF PPI subnetwork	0.03	0.900598	LNX1 (2.2)	SH3PXD2A (2.1)	FOXO1 (1.7)	LRRC31 (1.6)	FIP1L1 (1.5)	SLC38A2 (1.4)	MYNN (1.3)	SYNE1 (1.3)	ENSG00000226403 (1.2)	HK3 (1.2)
ENSG00000152137	HSPB8 PPI subnetwork	0.03	0.900598	KANK1 (3.0)	SLC38A1 (1.7)	CD44 (1.4)	OBFC1 (1.1)	GREB1 (1.0)	PSMD13 (0.9)	SLC38A2 (0.9)	SALL1 (0.9)	ATM (0.8)	SULT1B1 (0.7)
REACTOME_CYCLIN_AB1_ASSOCIATED_EVENTS_DURING_G2M_TRANSITION	REACTOME_CYCLIN_AB1_ASSOCIATED_EVENTS_DURING_G2M_TRANSITION	0.03	0.900598	LINC00339 (1.8)	KANK1 (1.8)	LRRC34 (1.6)	LNX1 (1.4)	MRPS31 (1.3)	SIRT3 (1.2)	COG6 (1.0)	NPAT (1.0)	ZNF346 (1.0)	DMRT1 (1.0)
GO:0048610	cellular process involved in reproduction	0.03	0.900598	DMRT1 (5.4)	C11orf65 (4.4)	ODF3 (4.0)	ENSG00000226403 (2.5)	ENSG00000184378 (1.6)	LRRC34 (1.5)	UIMC1 (1.4)	ATM (1.1)	FIP1L1 (0.9)	GREB1 (0.8)
ENSG00000115942	ORC2 PPI subnetwork	0.03	0.900598	NPAT (3.1)	OBFC1 (1.7)	ZNF346 (1.6)	FIP1L1 (1.6)	KDELC2 (1.5)	MRPS31 (1.0)	UIMC1 (1.0)	LINC00339 (0.9)	SLC38A2 (0.8)	ATM (0.8)
MP:0000929	open neural tube	0.03	0.900598	SALL1 (3.9)	TNRC6B (2.0)	KANK1 (1.8)	FOXO1 (1.7)	TERT (1.6)	FIP1L1 (1.3)	SH3PXD2A (1.2)	KDELC2 (1.2)	ATM (1.1)	ENSG00000228397 (1.0)
GO:0072593	reactive oxygen species metabolic process	0.03	0.900598	TERT (2.3)	ENSG00000226403 (2.0)	HK3 (1.6)	SULT1B1 (1.5)	C11orf65 (1.4)	ACAT1 (1.4)	WT1-AS (1.3)	SCGB1C1 (1.0)	SYNE1 (0.9)	GREB1 (0.9)
GO:0071219	cellular response to molecule of bacterial origin	0.03	0.900598	CDC42-IT1 (2.0)	SULT1B1 (2.0)	GREB1 (1.5)	HK3 (1.4)	LRRC31 (1.3)	LNX1 (1.1)	DMRT1 (1.1)	CD44 (1.1)	LRRC34 (1.1)	ENSG00000184378 (1.0)
ENSG00000019991	HGF PPI subnetwork	0.03	0.900598	HK3 (3.0)	SLC38A2 (2.6)	SYNE1 (2.2)	SULT1B1 (2.1)	EXPH5 (2.0)	LNX1 (1.3)	C11orf65 (1.2)	SH3PXD2A (1.0)	GREB1 (1.0)	MYNN (1.0)
ENSG00000170962	PDGFD PPI subnetwork	0.03	0.900598	HK3 (3.9)	SULT1B1 (2.7)	SLC38A2 (2.6)	MYNN (2.0)	SYNE1 (2.0)	LNX1 (1.9)	LRRC31 (1.3)	ENSG00000228397 (1.3)	EXPH5 (1.2)	GREB1 (1.2)
ENSG00000145431	PDGFC PPI subnetwork	0.03	0.900598	HK3 (3.9)	SULT1B1 (2.7)	SLC38A2 (2.6)	MYNN (2.0)	SYNE1 (2.0)	LNX1 (1.9)	LRRC31 (1.3)	ENSG00000228397 (1.3)	EXPH5 (1.2)	GREB1 (1.2)
GO:0034754	cellular hormone metabolic process	0.03	0.900598	GREB1 (4.2)	SULT1B1 (2.6)	WNT4 (2.0)	LNX1 (1.6)	WT1-AS (1.4)	FOXO1 (1.1)	EXPH5 (1.1)	TERT (1.1)	OBFC1 (1.0)	SALL1 (1.0)
ENSG00000172172	MRPL13 PPI subnetwork	0.03	0.900598	ACAT1 (3.0)	COG6 (2.9)	BET1L (2.2)	RIC8A (2.1)	TERT (2.1)	MRPS31 (1.9)	LRRC34 (1.9)	PSMD13 (1.9)	FIP1L1 (1.5)	SLC38A1 (1.5)
REACTOME_MEIOTIC_SYNAPSIS	REACTOME_MEIOTIC_SYNAPSIS	0.03	0.900598	C11orf65 (3.0)	DMRT1 (3.0)	UIMC1 (2.1)	ATM (2.0)	NPAT (1.9)	SCGB1C1 (1.4)	ENSG00000228397 (1.3)	TNRC6B (1.1)	SLC38A1 (1.1)	FIP1L1 (1.0)
ENSG00000049541	RFC2 PPI subnetwork	0.03	0.900598	ATM (3.3)	OBFC1 (3.1)	NPAT (3.1)	TNRC6B (1.9)	COG6 (1.7)	DMRT1 (1.7)	MRPS31 (1.6)	SLC38A2 (1.3)	LINC00339 (1.2)	KDELC2 (1.2)
GO:0010575	positive regulation vascular endothelial growth factor production	0.03	0.900598	TERT (2.6)	ZNF346 (2.5)	MYNN (2.1)	ENSG00000184378 (1.6)	SIRT3 (1.5)	SULT1B1 (1.3)	UIMC1 (1.3)	SH3PXD2A (1.0)	DMRT1 (0.9)	COG6 (0.9)
ENSG00000064995	TAF11 PPI subnetwork	0.03	0.900598	RIC8A (3.2)	MRPS31 (3.0)	BET1L (2.9)	MYNN (2.8)	FIP1L1 (2.7)	UIMC1 (2.5)	SLC25A15 (1.8)	DMRT1 (1.7)	NPAT (1.6)	FOXO1 (1.4)
ENSG00000140451	PIF1 PPI subnetwork	0.03	0.900598	OBFC1 (4.0)	TERT (3.2)	NPAT (2.1)	SLC25A15 (1.9)	MRPS31 (1.8)	LNX1 (1.5)	COG6 (1.4)	FOXO1 (1.1)	ENSG00000228397 (0.8)	ATM (0.8)
ENSG00000160691	SHC1 PPI subnetwork	0.03	0.900598	HK3 (2.0)	FOXO1 (2.0)	KANK1 (1.6)	CD44 (1.6)	SLC38A1 (1.3)	TNRC6B (1.1)	SLC38A2 (1.1)	WT1-AS (1.0)	ENSG00000228397 (0.9)	TERT (0.8)
ENSG00000085511	MAP3K4 PPI subnetwork	0.03	0.900598	COG6 (2.7)	UIMC1 (2.4)	LRRC31 (1.8)	CUL5 (1.8)	SULT1B1 (1.6)	EXPH5 (1.6)	LNX1 (1.2)	ACAT1 (1.1)	SYNE1 (1.1)	ODF3 (1.1)
MP:0004187	cardia bifida	0.03	0.900598	OBFC1 (1.7)	SULT1B1 (1.7)	SH3PXD2A (1.5)	ENSG00000228397 (1.4)	ZNF346 (1.4)	SALL1 (1.4)	KANK1 (1.4)	GREB1 (1.4)	ENSG00000184378 (1.3)	ATM (0.9)
GO:0007141	male meiosis I	0.03	0.900598	DMRT1 (4.0)	ENSG00000226403 (3.3)	LRRC34 (3.2)	C11orf65 (2.2)	UIMC1 (1.8)	ZNF346 (1.7)	COG6 (1.7)	ENSG00000228397 (1.7)	ENSG00000184378 (1.3)	ODF3 (1.0)
ENSG00000144597	EAF1 PPI subnetwork	0.03	0.900598	MYNN (2.6)	LINC00339 (1.6)	WT1-AS (1.4)	LNX1 (1.4)	FIP1L1 (1.4)	UIMC1 (1.3)	MRPS31 (1.3)	TERT (1.3)	GREB1 (1.2)	FOXO1 (0.9)
ENSG00000180209	MYLPF PPI subnetwork	0.03	0.900598	NPAT (2.6)	DMRT1 (2.4)	FIP1L1 (1.5)	ENSG00000258096 (1.3)	ATM (1.3)	BET1L (1.2)	SLC38A2 (1.1)	ENSG00000228397 (1.1)	ZNF346 (1.1)	ACAT1 (1.0)
GO:0007131	reciprocal meiotic recombination	0.03	0.900598	ATM (3.2)	ZNF346 (3.0)	TERT (3.0)	C11orf65 (2.8)	DMRT1 (2.8)	NPAT (2.5)	UIMC1 (2.2)	ENSG00000226403 (2.1)	ENSG00000228397 (2.1)	LINC00339 (2.0)
GO:0035825	reciprocal DNA recombination	0.03	0.900598	ATM (3.2)	ZNF346 (3.0)	TERT (3.0)	C11orf65 (2.8)	DMRT1 (2.8)	NPAT (2.5)	UIMC1 (2.2)	ENSG00000226403 (2.1)	ENSG00000228397 (2.1)	LINC00339 (2.0)
MP:0006379	abnormal spermatocyte morphology	0.03	0.900598	DMRT1 (7.8)	C11orf65 (3.6)	UIMC1 (3.0)	ZNF346 (2.3)	ENSG00000184378 (1.8)	ENSG00000226403 (1.7)	NPAT (1.6)	OBFC1 (1.6)	COG6 (1.5)	LRRC31 (1.1)
ENSG00000078900	TP73 PPI subnetwork	0.03	0.900598	WT1-AS (5.6)	WNT4 (2.2)	FOXO1 (1.7)	MYNN (1.7)	SYNE1 (1.7)	TNRC6B (1.7)	RIC8A (1.6)	CUL5 (1.4)	ZNF346 (1.3)	NPAT (1.2)
MP:0002144	abnormal B cell differentiation	0.03	0.900598	FOXO1 (3.8)	TERT (2.3)	CD44 (2.2)	LRRC34 (1.8)	TNRC6B (1.5)	SLC38A1 (1.4)	WT1-AS (1.0)	DMRT1 (0.8)	RIC8A (0.7)	LINC00339 (0.7)
ENSG00000113810	SMC4 PPI subnetwork	0.03	0.900598	FIP1L1 (2.5)	ATM (2.5)	NPAT (2.0)	SLC38A2 (1.9)	PSMD13 (1.7)	MRPS31 (1.6)	KDELC2 (1.3)	ACAT1 (1.1)	OBFC1 (1.0)	COG6 (1.0)
ENSG00000102678	FGF9 PPI subnetwork	0.03	0.900598	LNX1 (3.3)	WNT4 (2.6)	SH3PXD2A (2.0)	ZNF346 (1.7)	UIMC1 (1.5)	LRRC31 (1.4)	C11orf65 (1.2)	TERT (1.2)	KDELC2 (1.2)	WT1-AS (1.2)
ENSG00000087903	RFX2 PPI subnetwork	0.03	0.900598	ENSG00000228397 (3.6)	ATM (3.0)	NPAT (2.6)	TNRC6B (2.4)	FIP1L1 (1.8)	WNT4 (1.5)	DMRT1 (1.3)	ENSG00000226403 (1.2)	UIMC1 (1.1)	LRRC34 (1.0)
ENSG00000131759	RARA PPI subnetwork	0.03	0.900598	TNRC6B (3.8)	FOXO1 (3.1)	UIMC1 (1.9)	SLC38A2 (1.7)	SIRT3 (1.6)	SH3PXD2A (1.5)	MRPS31 (1.5)	WNT4 (1.4)	FIP1L1 (1.2)	MYNN (1.0)
GO:0000123	histone acetyltransferase complex	0.03	0.900598	MYNN (3.0)	UIMC1 (2.3)	LINC00339 (2.2)	FIP1L1 (1.6)	TNRC6B (1.6)	COG6 (1.2)	SLC38A2 (1.2)	TERT (1.1)	DMRT1 (1.1)	KDELC2 (0.9)
ENSG00000129219	PLD2 PPI subnetwork	0.03	0.900598	CD44 (2.2)	TERT (2.0)	KANK1 (1.9)	SLC38A1 (1.8)	SULT1B1 (1.6)	RIC8A (1.6)	WT1-AS (1.6)	SCGB1C1 (1.3)	ENSG00000228397 (1.1)	NPAT (1.1)
MP:0008254	increased megakaryocyte cell number	0.03	0.900598	LRRC34 (2.0)	SLC25A15 (2.0)	C11orf65 (1.8)	LNX1 (1.7)	FIP1L1 (1.7)	TNRC6B (1.6)	LRRC31 (1.4)	CD44 (1.3)	ODF3 (0.9)	UIMC1 (0.8)
ENSG00000168488	ATXN2L PPI subnetwork	0.03	0.900598	TNRC6B (4.7)	ENSG00000228397 (2.5)	GREB1 (2.0)	WT1-AS (1.7)	ENSG00000258096 (1.7)	ENSG00000184378 (1.5)	ZNF346 (1.4)	FOXO1 (1.1)	CD44 (1.1)	CUL5 (1.0)
MP:0003229	abnormal vitelline vasculature morphology	0.03	0.900598	SALL1 (3.0)	SLC38A2 (1.9)	TERT (1.7)	FOXO1 (1.6)	ENSG00000228397 (1.6)	MYNN (1.4)	SYNE1 (1.4)	SH3PXD2A (1.3)	TNRC6B (1.3)	NPAT (1.2)
MP:0004686	decreased length of long bones	0.03	0.900598	KANK1 (2.9)	SH3PXD2A (2.4)	LNX1 (1.8)	FOXO1 (1.7)	BET1L (1.4)	LRRC31 (1.4)	WNT4 (1.2)	COG6 (1.0)	C11orf65 (0.9)	TNRC6B (0.7)
ENSG00000183558	HIST2H2AA3 PPI subnetwork	0.03	0.900598	SCGB1C1 (3.2)	CUL5 (3.0)	FIP1L1 (2.3)	ATM (1.9)	DMRT1 (1.6)	SLC38A1 (1.4)	MRPS31 (1.3)	UIMC1 (1.3)	TNRC6B (1.2)	KDELC2 (1.2)
ENSG00000203812	HIST2H2AA4 PPI subnetwork	0.03	0.900598	SCGB1C1 (3.2)	CUL5 (3.0)	FIP1L1 (2.3)	ATM (1.9)	DMRT1 (1.6)	SLC38A1 (1.4)	MRPS31 (1.3)	UIMC1 (1.3)	TNRC6B (1.2)	KDELC2 (1.2)
GO:0051320	S phase	0.03	0.900598	NPAT (2.7)	ZNF346 (2.6)	ENSG00000258096 (2.2)	PSMD13 (2.1)	ENSG00000228397 (2.1)	MRPS31 (1.8)	OBFC1 (1.6)	KDELC2 (1.5)	UIMC1 (1.4)	MYNN (1.2)
ENSG00000147601	TERF1 PPI subnetwork	0.03	0.900598	ENSG00000228397 (3.0)	NPAT (3.0)	SLC38A1 (2.0)	DMRT1 (1.8)	CUL5 (1.7)	CDC42-IT1 (1.5)	MYNN (1.4)	OBFC1 (1.4)	SALL1 (1.2)	ATM (1.2)
GO:0035257	nuclear hormone receptor binding	0.03	0.900598	TNRC6B (4.0)	FOXO1 (2.5)	GREB1 (2.4)	FIP1L1 (2.1)	SLC38A2 (1.9)	MRPS31 (1.6)	CDC42-IT1 (1.4)	WT1-AS (1.4)	WNT4 (1.4)	UIMC1 (1.1)
MP:0004933	abnormal epididymis epithelium morphology	0.03	0.900598	GREB1 (5.4)	DMRT1 (4.1)	FOXO1 (2.2)	TERT (2.0)	ODF3 (1.6)	ENSG00000258096 (1.5)	LRRC31 (1.2)	WNT4 (1.1)	SALL1 (0.9)	WT1-AS (0.9)
GO:0001676	long-chain fatty acid metabolic process	0.03	0.900598	CDC42-IT1 (2.6)	LRRC34 (1.7)	ENSG00000184378 (1.6)	SLC25A15 (1.5)	DMRT1 (1.2)	ENSG00000258096 (1.2)	TNRC6B (1.1)	SULT1B1 (0.8)	MRPS31 (0.8)	ACAT1 (0.8)
ENSG00000067334	DNTTIP2 PPI subnetwork	0.03	0.900598	GREB1 (2.9)	BET1L (2.9)	FIP1L1 (2.8)	C11orf65 (2.4)	FOXO1 (2.1)	ENSG00000228397 (1.6)	DMRT1 (1.5)	ENSG00000226403 (1.2)	KANK1 (1.2)	MRPS31 (1.2)
ENSG00000146674	IGFBP3 PPI subnetwork	0.03	0.900598	SH3PXD2A (2.8)	SCGB1C1 (2.4)	WNT4 (1.6)	C11orf65 (1.5)	HK3 (1.4)	TNRC6B (1.3)	RIC8A (1.2)	GREB1 (1.2)	PSMD13 (1.0)	SYNE1 (0.8)
ENSG00000133895	MEN1 PPI subnetwork	0.03	0.900598	NPAT (3.6)	CD44 (3.3)	LINC00339 (2.4)	FOXO1 (1.4)	KDELC2 (1.4)	ZNF346 (1.4)	UIMC1 (1.3)	DMRT1 (1.2)	MRPS31 (1.1)	COG6 (1.0)
ENSG00000122218	COPA PPI subnetwork	0.03	0.900598	COG6 (4.4)	PSMD13 (3.2)	BET1L (2.8)	ACAT1 (2.4)	CUL5 (1.9)	LINC00339 (1.8)	RIC8A (1.8)	MRPS31 (1.7)	C11orf65 (1.5)	CDC42 (1.4)
MP:0005606	increased bleeding time	0.03	0.900598	SCGB1C1 (5.4)	SULT1B1 (2.2)	SIRT3 (2.0)	HK3 (1.7)	RIC8A (1.6)	COG6 (1.3)	SYNE1 (1.3)	CD44 (1.2)	OBFC1 (1.2)	C11orf65 (0.8)
REACTOME_SYNTHESIS_SECRETION_AND_INACTIVATION_OF_GLUCOSE:DEPENDENT_INSULINOTROPIC_POLYPEPTIDE_GIP	REACTOME_SYNTHESIS_SECRETION_AND_INACTIVATION_OF_GLUCOSE:DEPENDENT_INSULINOTROPIC_POLYPEPTIDE_GIP	0.03	0.900598	DMRT1 (2.1)	CD44 (1.9)	GREB1 (1.9)	BET1L (1.6)	WT1-AS (1.3)	SULT1B1 (1.2)	COG6 (1.2)	SLC25A15 (1.1)	ATM (1.0)	WNT4 (1.0)
ENSG00000092470	WDR76 PPI subnetwork	0.03	0.900598	LINC00339 (4.0)	OBFC1 (2.9)	ATM (2.8)	NPAT (2.6)	MYNN (2.3)	ZNF346 (2.1)	MRPS31 (2.0)	DMRT1 (1.9)	UIMC1 (1.6)	RIC8A (1.6)
GO:0042445	hormone metabolic process	0.03	0.900598	GREB1 (3.5)	WNT4 (2.7)	SULT1B1 (2.0)	SALL1 (1.8)	LNX1 (1.8)	ZNF346 (1.3)	ENSG00000258096 (1.2)	LRRC31 (1.1)	SLC25A15 (1.0)	WT1-AS (0.9)
GO:0035137	hindlimb morphogenesis	0.03	0.900598	LNX1 (2.4)	ENSG00000228397 (2.1)	SALL1 (1.8)	FOXO1 (1.7)	GREB1 (1.6)	TERT (1.5)	FIP1L1 (1.4)	TNRC6B (1.3)	DMRT1 (1.3)	ATM (1.2)
GO:0019843	rRNA binding	0.03	0.900598	ENSG00000226403 (2.0)	LRRC31 (2.0)	SIRT3 (1.7)	SLC38A2 (1.6)	ACAT1 (1.6)	FOXO1 (1.5)	DMRT1 (1.5)	TNRC6B (1.4)	BET1L (1.2)	RIC8A (1.1)
MP:0002932	abnormal joint morphology	0.03	0.900598	FOXO1 (4.0)	SH3PXD2A (3.1)	KANK1 (2.4)	LNX1 (1.8)	ENSG00000228397 (1.4)	SYNE1 (1.1)	SLC25A15 (0.9)	MRPS31 (0.8)	WNT4 (0.7)	LRRC31 (0.7)
ENSG00000137259	HIST1H2AB PPI subnetwork	0.04	0.900598	SCGB1C1 (3.4)	CUL5 (3.0)	FIP1L1 (1.8)	DMRT1 (1.8)	SLC38A1 (1.5)	ATM (1.4)	KDELC2 (1.3)	UIMC1 (1.2)	C11orf65 (1.1)	SLC38A2 (1.0)
ENSG00000168274	HIST1H2AE PPI subnetwork	0.04	0.900598	SCGB1C1 (3.4)	CUL5 (3.0)	FIP1L1 (1.8)	DMRT1 (1.8)	SLC38A1 (1.5)	ATM (1.4)	KDELC2 (1.3)	UIMC1 (1.2)	C11orf65 (1.1)	SLC38A2 (1.0)
ENSG00000164344	KLKB1 PPI subnetwork	0.04	0.900598	SLC25A15 (1.5)	SALL1 (1.4)	LNX1 (1.4)	ENSG00000226403 (1.2)	SIRT3 (1.2)	C11orf65 (1.1)	WNT4 (1.1)	LINC00339 (1.0)	LRRC31 (0.9)	DMRT1 (0.9)
ENSG00000121486	TRMT1L PPI subnetwork	0.04	0.900598	PSMD13 (2.4)	OBFC1 (2.1)	ACAT1 (2.0)	ATM (1.9)	SLC38A2 (1.8)	SLC38A1 (1.7)	MYNN (1.7)	COG6 (1.7)	MRPS31 (1.1)	SCGB1C1 (1.1)
GO:0003730	mRNA 3'-UTR binding	0.04	0.900598	C11orf65 (2.9)	DMRT1 (2.7)	WT1-AS (2.1)	SLC38A1 (2.0)	SALL1 (1.7)	CDC42 (1.6)	FIP1L1 (1.6)	MYNN (1.4)	ODF3 (1.3)	TNRC6B (1.1)
GO:0009409	response to cold	0.04	0.900598	ZNF346 (2.3)	ENSG00000226403 (2.1)	LRRC34 (1.9)	CDC42-IT1 (1.8)	C11orf65 (1.8)	LINC00339 (1.2)	GREB1 (1.2)	ENSG00000258096 (1.2)	SIRT3 (1.1)	ACAT1 (1.1)
ENSG00000100294	MCAT PPI subnetwork	0.04	0.900598	TNRC6B (4.0)	ZNF346 (1.4)	ENSG00000228397 (1.4)	DMRT1 (1.4)	BET1L (1.2)	ENSG00000184378 (1.2)	FOXO1 (1.0)	SCGB1C1 (1.0)	ATM (0.8)	CD44 (0.7)
KEGG_ARACHIDONIC_ACID_METABOLISM	KEGG_ARACHIDONIC_ACID_METABOLISM	0.04	0.900598	SULT1B1 (2.9)	SCGB1C1 (2.7)	KANK1 (1.9)	ENSG00000226403 (1.8)	LNX1 (1.6)	SIRT3 (1.4)	WNT4 (1.1)	ODF3 (1.1)	GREB1 (1.0)	CDC42-IT1 (1.0)
REACTOME_MEIOTIC_RECOMBINATION	REACTOME_MEIOTIC_RECOMBINATION	0.04	0.900598	SCGB1C1 (4.0)	NPAT (3.8)	ATM (2.5)	KDELC2 (2.1)	UIMC1 (1.8)	ENSG00000228397 (1.7)	OBFC1 (1.7)	DMRT1 (1.7)	C11orf65 (1.6)	MRPS31 (1.1)
GO:0000084	S phase of mitotic cell cycle	0.04	0.900598	NPAT (2.5)	ZNF346 (2.4)	PSMD13 (2.4)	ENSG00000258096 (2.0)	MRPS31 (1.9)	OBFC1 (1.7)	MYNN (1.6)	ENSG00000228397 (1.5)	UIMC1 (1.3)	KDELC2 (1.2)
ENSG00000159459	UBR1 PPI subnetwork	0.04	0.900598	CUL5 (4.1)	MYNN (2.7)	C11orf65 (2.4)	LINC00339 (2.0)	LNX1 (1.9)	WNT4 (1.9)	CDC42-IT1 (1.8)	UIMC1 (1.6)	NPAT (1.5)	TNRC6B (1.4)
GO:0000228	nuclear chromosome	0.04	0.900598	NPAT (3.4)	UIMC1 (2.1)	ATM (1.9)	FIP1L1 (1.9)	TNRC6B (1.8)	ENSG00000228397 (1.7)	TERT (1.5)	OBFC1 (1.4)	SLC38A2 (1.3)	ZNF346 (1.3)
ENSG00000108504	ENSG00000108504 PPI subnetwork	0.04	0.900598	CDC42-IT1 (2.6)	NPAT (2.2)	CUL5 (2.0)	LNX1 (1.8)	ZNF346 (1.8)	UIMC1 (1.3)	CDC42 (1.2)	FIP1L1 (1.2)	PSMD13 (1.1)	KDELC2 (1.1)
KEGG_PANTOTHENATE_AND_COA_BIOSYNTHESIS	KEGG_PANTOTHENATE_AND_COA_BIOSYNTHESIS	0.04	0.900598	SULT1B1 (3.0)	SIRT3 (2.2)	OBFC1 (1.8)	SH3PXD2A (1.7)	LINC00339 (1.5)	ACAT1 (1.4)	SLC38A2 (1.4)	PSMD13 (1.2)	LNX1 (1.2)	SLC38A1 (1.2)
REACTOME_METABOLISM_OF_POLYAMINES	REACTOME_METABOLISM_OF_POLYAMINES	0.04	0.900598	SCGB1C1 (2.1)	ENSG00000226403 (1.8)	ACAT1 (1.6)	ZNF346 (1.5)	ENSG00000184378 (1.4)	COG6 (1.3)	DMRT1 (1.3)	SALL1 (1.3)	CUL5 (1.1)	LNX1 (1.0)
MP:0002286	cryptorchism	0.04	0.900598	GREB1 (4.4)	SALL1 (4.3)	DMRT1 (2.9)	LRRC31 (2.3)	WT1-AS (1.9)	SLC38A1 (1.6)	LRRC34 (1.4)	SULT1B1 (1.3)	KANK1 (1.1)	MYNN (1.1)
REACTOME_PROLACTIN_RECEPTOR_SIGNALING	REACTOME_PROLACTIN_RECEPTOR_SIGNALING	0.04	0.900598	KANK1 (2.1)	WNT4 (1.8)	FOXO1 (1.8)	CD44 (1.5)	WT1-AS (1.3)	EXPH5 (1.1)	GREB1 (1.0)	CUL5 (1.0)	ATM (0.9)	ODF3 (0.9)
MP:0008280	male germ cell apoptosis	0.04	0.900598	DMRT1 (5.9)	C11orf65 (3.1)	ENSG00000184378 (2.2)	KANK1 (1.9)	UIMC1 (1.7)	WT1-AS (1.6)	LRRC34 (1.4)	FIP1L1 (1.3)	COG6 (1.2)	ENSG00000226403 (1.1)
ENSG00000189079	ARID2 PPI subnetwork	0.04	0.900598	SLC38A1 (1.9)	ODF3 (1.8)	COG6 (1.8)	FIP1L1 (1.8)	TNRC6B (1.7)	DMRT1 (1.6)	ENSG00000184378 (1.6)	SLC38A2 (1.5)	SULT1B1 (1.5)	ENSG00000228397 (1.4)
MP:0000691	enlarged spleen	0.04	0.900598	CD44 (1.9)	TNRC6B (1.7)	HK3 (1.6)	SLC38A1 (1.5)	FOXO1 (1.4)	NPAT (1.2)	SLC38A2 (0.9)	SLC25A15 (0.8)	LRRC31 (0.8)	LRRC34 (0.7)
ENSG00000163877	SNIP1 PPI subnetwork	0.04	0.900598	NPAT (2.9)	MYNN (2.6)	TNRC6B (2.5)	FIP1L1 (2.2)	UIMC1 (2.2)	SLC38A2 (2.0)	FOXO1 (1.9)	CUL5 (1.7)	CDC42 (1.6)	BET1L (1.2)
GO:0032993	protein-DNA complex	0.04	0.900598	ODF3 (3.2)	ENSG00000228397 (2.6)	SCGB1C1 (2.1)	ENSG00000258096 (2.0)	TNRC6B (1.8)	DMRT1 (1.7)	ATM (1.5)	NPAT (1.4)	SLC38A1 (1.3)	UIMC1 (0.9)
MP:0000427	abnormal hair cycle	0.04	0.900598	CD44 (2.0)	EXPH5 (2.0)	ENSG00000184378 (1.9)	GREB1 (1.8)	RIC8A (1.7)	SIRT3 (1.7)	WNT4 (1.5)	SH3PXD2A (1.4)	MRPS31 (1.3)	SYNE1 (1.3)
GO:0035267	NuA4 histone acetyltransferase complex	0.04	0.900598	MYNN (2.4)	MRPS31 (2.3)	SYNE1 (2.0)	FIP1L1 (1.7)	LINC00339 (1.4)	UIMC1 (1.2)	C11orf65 (1.1)	PSMD13 (1.1)	OBFC1 (1.1)	COG6 (0.9)
GO:0007062	sister chromatid cohesion	0.04	0.900598	CUL5 (3.3)	NPAT (2.7)	TERT (2.6)	ATM (2.5)	ENSG00000226403 (2.2)	OBFC1 (1.5)	COG6 (1.4)	MRPS31 (1.4)	UIMC1 (1.3)	C11orf65 (1.1)
MP:0008008	early cellular replicative senescence	0.04	0.900598	COG6 (2.4)	TERT (2.3)	FIP1L1 (2.2)	KANK1 (1.7)	MYNN (1.7)	LINC00339 (1.4)	RIC8A (1.3)	FOXO1 (1.3)	OBFC1 (1.1)	SLC38A2 (1.1)
GO:0042744	hydrogen peroxide catabolic process	0.04	0.900598	HK3 (1.7)	KDELC2 (1.7)	WT1-AS (1.5)	TERT (1.4)	LNX1 (1.3)	DMRT1 (1.1)	ENSG00000226403 (1.1)	ACAT1 (1.0)	SH3PXD2A (1.0)	SALL1 (0.8)
GO:0043691	reverse cholesterol transport	0.04	0.900598	SCGB1C1 (2.1)	ENSG00000258096 (1.8)	ZNF346 (1.7)	ENSG00000228397 (1.7)	C11orf65 (1.7)	LNX1 (1.6)	DMRT1 (1.5)	SLC25A15 (1.3)	CDC42-IT1 (1.2)	SULT1B1 (1.2)
MP:0001923	reduced female fertility	0.04	0.900598	FOXO1 (3.0)	SLC38A2 (2.3)	GREB1 (2.2)	ODF3 (1.9)	WNT4 (1.8)	CD44 (1.7)	TNRC6B (1.7)	KANK1 (1.5)	SALL1 (1.3)	SLC25A15 (1.1)
ENSG00000100393	EP300 PPI subnetwork	0.04	0.900598	SLC38A2 (2.6)	FOXO1 (2.5)	TNRC6B (2.3)	FIP1L1 (2.1)	SALL1 (1.7)	MRPS31 (1.3)	GREB1 (1.1)	KANK1 (1.1)	UIMC1 (1.0)	SH3PXD2A (1.0)
MP:0002682	decreased mature ovarian follicle number	0.04	0.900598	C11orf65 (3.2)	ENSG00000226403 (2.8)	DMRT1 (2.4)	WT1-AS (2.1)	SLC38A2 (1.3)	ACAT1 (1.2)	UIMC1 (1.2)	ZNF346 (1.1)	ENSG00000258096 (1.0)	SIRT3 (0.9)
MP:0005659	decreased susceptibility to diet-induced obesity	0.04	0.900598	FOXO1 (2.5)	CDC42-IT1 (2.3)	DMRT1 (2.1)	SLC25A15 (1.8)	ACAT1 (1.7)	LRRC31 (1.5)	SH3PXD2A (1.4)	SULT1B1 (1.4)	LNX1 (1.2)	SLC38A2 (1.2)
ENSG00000183765	CHEK2 PPI subnetwork	0.04	0.900598	NPAT (3.3)	TERT (2.1)	UIMC1 (2.1)	ATM (1.8)	MRPS31 (1.6)	KDELC2 (1.5)	FIP1L1 (1.5)	ENSG00000228397 (1.1)	OBFC1 (1.0)	TNRC6B (0.9)
GO:0018024	histone-lysine N-methyltransferase activity	0.04	0.900598	UIMC1 (3.4)	TNRC6B (2.9)	DMRT1 (2.2)	NPAT (2.0)	ZNF346 (2.0)	ATM (2.0)	TERT (1.3)	WT1-AS (1.2)	COG6 (1.1)	FOXO1 (1.1)
MP:0008037	abnormal T cell morphology	0.04	0.900598	OBFC1 (2.7)	SLC38A1 (1.6)	FOXO1 (1.2)	TERT (1.1)	TNRC6B (1.1)	LRRC31 (0.9)	HK3 (0.8)	ENSG00000184378 (0.7)	DMRT1 (0.6)	WT1-AS (0.5)
ENSG00000112237	CCNC PPI subnetwork	0.04	0.900598	TNRC6B (2.7)	FIP1L1 (2.1)	MRPS31 (1.7)	ENSG00000226403 (1.6)	COG6 (1.6)	CUL5 (1.3)	MYNN (1.0)	BET1L (0.8)	NPAT (0.8)	UIMC1 (0.7)
ENSG00000145216	FIP1L1 PPI subnetwork	0.04	0.900598	CUL5 (4.0)	C11orf65 (2.5)	FIP1L1 (2.5)	NPAT (2.0)	MRPS31 (1.6)	SCGB1C1 (1.5)	KDELC2 (1.4)	CDC42 (1.4)	EXPH5 (1.3)	DMRT1 (1.0)
GO:0040014	regulation of multicellular organism growth	0.04	0.900598	GREB1 (2.5)	ENSG00000258096 (2.4)	TNRC6B (1.8)	ENSG00000228397 (1.5)	KANK1 (1.2)	LRRC34 (1.2)	ENSG00000226403 (1.1)	WT1-AS (1.0)	DMRT1 (0.9)	SIRT3 (0.9)
ENSG00000112249	ASCC3 PPI subnetwork	0.04	0.900598	TNRC6B (3.5)	ZNF346 (2.3)	BET1L (2.1)	ENSG00000184378 (2.0)	MYNN (1.3)	ENSG00000228397 (1.2)	OBFC1 (1.1)	TERT (1.1)	LRRC34 (1.0)	UIMC1 (1.0)
ENSG00000205250	E2F4 PPI subnetwork	0.04	0.900598	NPAT (2.7)	WT1-AS (2.7)	TNRC6B (2.3)	TERT (1.4)	KANK1 (1.4)	LINC00339 (1.4)	FOXO1 (1.2)	SLC25A15 (1.1)	FIP1L1 (1.0)	ATM (0.9)
ENSG00000185634	SHC4 PPI subnetwork	0.04	0.900598	HK3 (3.0)	SULT1B1 (2.5)	SLC38A2 (2.3)	LNX1 (1.9)	SYNE1 (1.8)	SH3PXD2A (1.8)	C11orf65 (1.7)	MYNN (1.6)	EXPH5 (1.5)	ENSG00000228397 (1.3)
ENSG00000161939	C17orf49 PPI subnetwork	0.04	0.900598	COG6 (2.5)	MRPS31 (2.3)	UIMC1 (1.9)	DMRT1 (1.9)	LINC00339 (1.8)	TNRC6B (1.3)	ENSG00000184378 (1.0)	TERT (0.9)	PSMD13 (0.7)	SLC38A2 (0.7)
GO:0034339	regulation of transcription from RNA polymerase II promoter by nuclear hormone receptor	0.04	0.900598	GREB1 (2.2)	SIRT3 (2.2)	CDC42-IT1 (2.2)	LNX1 (2.1)	TERT (1.8)	TNRC6B (1.8)	SLC25A15 (1.4)	LRRC34 (1.2)	LINC00339 (1.1)	ENSG00000258096 (1.0)
ENSG00000158042	MRPL17 PPI subnetwork	0.04	0.900598	MRPS31 (2.6)	DMRT1 (2.1)	FIP1L1 (2.0)	ACAT1 (1.9)	SLC25A15 (1.8)	TERT (1.8)	PSMD13 (1.8)	OBFC1 (1.7)	EXPH5 (1.4)	NPAT (1.2)
ENSG00000138709	LARP1B PPI subnetwork	0.04	0.900598	MYNN (2.8)	CUL5 (2.6)	FIP1L1 (2.5)	SCGB1C1 (2.3)	ATM (1.8)	SLC38A1 (1.8)	C11orf65 (1.5)	CDC42 (1.4)	MRPS31 (1.2)	LINC00339 (1.2)
MP:0008537	increased susceptibility to induced colitis	0.04	0.900598	SULT1B1 (4.7)	LRRC31 (3.2)	HK3 (2.7)	CD44 (2.1)	WNT4 (1.7)	KANK1 (1.4)	ENSG00000226403 (1.3)	SLC25A15 (1.1)	SLC38A2 (0.9)	SLC38A1 (0.8)
GO:0008094	DNA-dependent ATPase activity	0.04	0.900598	NPAT (3.1)	ATM (2.8)	OBFC1 (2.3)	TERT (2.1)	FIP1L1 (2.1)	KDELC2 (1.9)	UIMC1 (1.8)	LRRC34 (1.5)	DMRT1 (1.4)	ENSG00000228397 (1.3)
ENSG00000076003	MCM6 PPI subnetwork	0.04	0.900598	NPAT (3.8)	KDELC2 (1.9)	ENSG00000228397 (1.6)	OBFC1 (1.3)	MRPS31 (1.1)	FIP1L1 (1.1)	ATM (1.0)	LRRC31 (0.8)	SCGB1C1 (0.8)	TERT (0.7)
ENSG00000100316	RPL3 PPI subnetwork	0.04	0.900598	FIP1L1 (2.7)	ENSG00000226403 (1.3)	RIC8A (1.0)	CDC42 (0.9)	SLC38A1 (0.9)	LRRC34 (0.9)	MRPS31 (0.8)	ATM (0.8)	KANK1 (0.8)	PSMD13 (0.8)
REACTOME_PLATELET_AGGREGATION_PLUG_FORMATION	REACTOME_PLATELET_AGGREGATION_PLUG_FORMATION	0.04	0.900598	SCGB1C1 (3.2)	GREB1 (1.6)	ENSG00000258096 (1.3)	WT1-AS (1.3)	SYNE1 (1.3)	C11orf65 (1.1)	SLC25A15 (1.1)	COG6 (1.1)	ENSG00000184378 (1.1)	SALL1 (0.9)
MP:0003409	decreased width of hypertrophic chondrocyte zone	0.04	0.900598	GREB1 (3.2)	LNX1 (2.8)	FOXO1 (2.3)	KANK1 (2.3)	WNT4 (2.0)	LRRC31 (2.0)	SH3PXD2A (1.9)	WT1-AS (1.6)	ODF3 (1.3)	KDELC2 (1.1)
ENSG00000184863	RBM33 PPI subnetwork	0.04	0.900598	TNRC6B (4.6)	ZNF346 (2.0)	ENSG00000228397 (1.7)	BET1L (1.4)	DMRT1 (1.2)	ENSG00000184378 (1.2)	SCGB1C1 (1.1)	FOXO1 (1.0)	ATM (1.0)	KANK1 (0.8)
MP:0002427	disproportionate dwarf	0.04	0.900598	WNT4 (2.3)	SH3PXD2A (2.2)	ENSG00000228397 (1.5)	LNX1 (1.4)	LRRC31 (1.3)	KDELC2 (1.3)	KANK1 (1.3)	SULT1B1 (1.2)	SLC25A15 (1.1)	FOXO1 (0.9)
MP:0004969	pale kidney	0.04	0.900598	KANK1 (2.6)	TNRC6B (2.6)	ENSG00000226403 (1.6)	FOXO1 (1.5)	SALL1 (1.5)	ATM (1.2)	CDC42-IT1 (1.0)	GREB1 (1.0)	SLC38A1 (0.7)	NPAT (0.7)
ENSG00000196911	KPNA5 PPI subnetwork	0.04	0.900598	CUL5 (3.6)	MRPS31 (2.2)	PSMD13 (2.1)	NPAT (2.1)	SLC25A15 (1.6)	UIMC1 (1.4)	ATM (1.3)	SLC38A1 (1.1)	SLC38A2 (1.0)	FIP1L1 (0.9)
GO:0042162	telomeric DNA binding	0.04	0.900598	FIP1L1 (2.5)	SYNE1 (2.5)	TNRC6B (2.3)	LNX1 (1.4)	SH3PXD2A (1.3)	SIRT3 (1.3)	CDC42-IT1 (1.2)	OBFC1 (1.1)	FOXO1 (1.0)	NPAT (1.0)
ENSG00000147133	TAF1 PPI subnetwork	0.04	0.900598	FIP1L1 (2.8)	MRPS31 (2.6)	RIC8A (2.2)	DMRT1 (1.9)	TNRC6B (1.8)	CUL5 (1.7)	BET1L (1.6)	SCGB1C1 (1.6)	UIMC1 (1.5)	ATM (1.4)
ENSG00000108264	TADA2A PPI subnetwork	0.04	0.900598	DMRT1 (2.3)	UIMC1 (2.2)	ATM (1.9)	CDC42-IT1 (1.8)	SCGB1C1 (1.7)	RIC8A (1.6)	NPAT (1.5)	CUL5 (1.5)	FIP1L1 (1.4)	ENSG00000226403 (1.3)
ENSG00000116062	MSH6 PPI subnetwork	0.04	0.900598	ATM (4.2)	NPAT (3.3)	OBFC1 (3.2)	TERT (2.7)	SCGB1C1 (1.7)	KDELC2 (1.4)	SLC38A1 (1.3)	LINC00339 (1.2)	FIP1L1 (1.1)	MRPS31 (1.0)
GO:0048545	response to steroid hormone stimulus	0.04	0.900598	ENSG00000258096 (2.9)	SULT1B1 (2.2)	WNT4 (2.0)	LNX1 (2.0)	SLC25A15 (1.8)	LRRC31 (1.5)	GREB1 (1.4)	KANK1 (1.3)	SH3PXD2A (1.3)	FOXO1 (1.3)
GO:0042393	histone binding	0.04	0.900598	ZNF346 (4.0)	NPAT (3.7)	UIMC1 (3.2)	FIP1L1 (2.9)	CUL5 (1.9)	TNRC6B (1.6)	TERT (1.6)	ATM (1.4)	SLC38A2 (1.4)	KDELC2 (1.2)
ENSG00000143190	POU2F1 PPI subnetwork	0.04	0.900598	GREB1 (3.3)	SALL1 (2.4)	DMRT1 (2.2)	MRPS31 (2.0)	TNRC6B (1.9)	FOXO1 (1.8)	BET1L (1.8)	RIC8A (1.8)	ATM (1.5)	PSMD13 (1.2)
GO:0048285	organelle fission	0.04	0.900598	KDELC2 (3.0)	NPAT (2.6)	ATM (1.9)	OBFC1 (1.9)	CDC42-IT1 (1.5)	COG6 (1.5)	ZNF346 (1.4)	FIP1L1 (1.3)	CUL5 (1.3)	MYNN (1.2)
ENSG00000149269	PAK1 PPI subnetwork	0.04	0.900598	SULT1B1 (3.3)	SH3PXD2A (1.9)	RIC8A (1.7)	CD44 (1.7)	GREB1 (1.4)	WNT4 (1.2)	SALL1 (1.0)	ENSG00000226403 (0.9)	KDELC2 (0.8)	FIP1L1 (0.8)
MP:0010377	abnormal gut flora balance	0.04	0.900598	HK3 (3.5)	SULT1B1 (3.3)	CD44 (2.2)	ENSG00000258096 (1.5)	TERT (1.4)	KDELC2 (1.4)	ZNF346 (1.3)	LRRC31 (1.3)	WNT4 (1.2)	ENSG00000228397 (1.2)
ENSG00000188486	H2AFX PPI subnetwork	0.04	0.900598	CUL5 (3.3)	SCGB1C1 (2.9)	FIP1L1 (2.4)	NPAT (2.3)	ATM (2.1)	DMRT1 (1.9)	UIMC1 (1.7)	SLC38A1 (1.7)	KDELC2 (1.5)	CDC42-IT1 (1.4)
REACTOME_DIABETES_PATHWAYS	REACTOME_DIABETES_PATHWAYS	0.04	0.900598	BET1L (3.8)	SLC38A2 (2.4)	COG6 (2.1)	ATM (1.3)	WT1-AS (1.2)	ENSG00000258096 (1.2)	KDELC2 (1.2)	WNT4 (1.1)	MYNN (1.0)	PSMD13 (0.9)
GO:0005667	transcription factor complex	0.04	0.900598	SALL1 (2.7)	FOXO1 (2.2)	NPAT (1.8)	SLC25A15 (1.7)	TNRC6B (1.7)	WNT4 (1.4)	FIP1L1 (1.4)	SH3PXD2A (1.4)	TERT (1.3)	MRPS31 (1.2)
GO:0006310	DNA recombination	0.04	0.900598	NPAT (3.3)	TERT (3.3)	ATM (3.2)	OBFC1 (2.5)	UIMC1 (1.9)	KDELC2 (1.9)	ZNF346 (1.7)	MRPS31 (1.6)	LINC00339 (1.6)	MYNN (1.5)
ENSG00000141101	NOB1 PPI subnetwork	0.04	0.900598	FIP1L1 (2.5)	MRPS31 (1.6)	DMRT1 (1.6)	KANK1 (1.5)	TERT (1.3)	MYNN (1.2)	ENSG00000226403 (1.1)	PSMD13 (1.1)	FOXO1 (1.0)	SCGB1C1 (0.9)
GO:0019200	carbohydrate kinase activity	0.04	0.900598	SLC25A15 (1.8)	COG6 (1.6)	SIRT3 (1.5)	ENSG00000226403 (1.4)	CD44 (1.4)	LRRC34 (1.3)	C11orf65 (1.2)	HK3 (1.2)	SULT1B1 (1.1)	LNX1 (1.1)
GO:0006352	transcription initiation, DNA-dependent	0.04	0.900598	ZNF346 (2.9)	FIP1L1 (2.4)	MRPS31 (2.3)	NPAT (2.2)	MYNN (2.1)	BET1L (1.9)	CUL5 (1.7)	UIMC1 (1.5)	RIC8A (1.4)	DMRT1 (1.2)
ENSG00000082175	PGR PPI subnetwork	0.04	0.900598	FOXO1 (4.5)	SLC38A2 (2.3)	TNRC6B (2.2)	TERT (2.0)	SLC38A1 (1.8)	GREB1 (1.7)	COG6 (1.6)	OBFC1 (1.5)	MYNN (1.3)	ENSG00000226403 (1.1)
ENSG00000171848	RRM2 PPI subnetwork	0.04	0.900598	MRPS31 (3.4)	NPAT (2.2)	SLC25A15 (1.8)	SLC38A2 (1.6)	LINC00339 (1.5)	ATM (1.4)	ODF3 (1.2)	PSMD13 (1.2)	CUL5 (1.1)	FOXO1 (1.1)
GO:0031663	lipopolysaccharide-mediated signaling pathway	0.04	0.900598	TERT (2.4)	SULT1B1 (2.2)	LRRC34 (2.2)	LNX1 (1.9)	CDC42-IT1 (1.3)	CD44 (1.2)	OBFC1 (1.0)	SIRT3 (0.9)	ENSG00000184378 (0.8)	MRPS31 (0.8)
ENSG00000117450	PRDX1 PPI subnetwork	0.04	0.900598	CDC42 (3.8)	SLC38A1 (2.5)	SULT1B1 (2.3)	RIC8A (2.2)	ACAT1 (1.8)	PSMD13 (1.8)	CDC42-IT1 (1.7)	ENSG00000258096 (0.9)	TNRC6B (0.9)	CD44 (0.8)
GO:0006306	DNA methylation	0.04	0.900598	C11orf65 (4.4)	ENSG00000226403 (2.9)	TERT (2.7)	TNRC6B (2.2)	DMRT1 (2.1)	OBFC1 (2.0)	COG6 (1.8)	UIMC1 (1.8)	NPAT (1.5)	ENSG00000184378 (1.0)
GO:0006305	DNA alkylation	0.04	0.900598	C11orf65 (4.4)	ENSG00000226403 (2.9)	TERT (2.7)	TNRC6B (2.2)	DMRT1 (2.1)	OBFC1 (2.0)	COG6 (1.8)	UIMC1 (1.8)	NPAT (1.5)	ENSG00000184378 (1.0)
ENSG00000133243	BTBD2 PPI subnetwork	0.04	0.900598	CUL5 (3.0)	COG6 (2.1)	LINC00339 (2.1)	ACAT1 (2.0)	MYNN (1.8)	FIP1L1 (1.8)	BET1L (1.5)	CDC42 (1.5)	LNX1 (1.5)	NPAT (1.4)
ENSG00000108055	SMC3 PPI subnetwork	0.04	0.900598	DMRT1 (2.7)	FIP1L1 (2.4)	NPAT (2.0)	ENSG00000228397 (1.8)	ENSG00000226403 (1.7)	ACAT1 (1.6)	TNRC6B (1.3)	ATM (1.2)	PSMD13 (1.0)	SLC38A1 (1.0)
ENSG00000108604	SMARCD2 PPI subnetwork	0.04	0.900598	TNRC6B (3.5)	GREB1 (1.9)	TERT (1.7)	FIP1L1 (1.7)	ENSG00000228397 (1.6)	SALL1 (1.6)	FOXO1 (1.4)	CUL5 (1.1)	LRRC31 (1.1)	ENSG00000184378 (0.9)
GO:0051427	hormone receptor binding	0.05	0.900598	TNRC6B (3.7)	FOXO1 (2.6)	GREB1 (2.5)	FIP1L1 (2.4)	WT1-AS (1.9)	WNT4 (1.6)	MRPS31 (1.3)	CDC42-IT1 (1.3)	ENSG00000184378 (1.1)	LRRC31 (1.1)
ENSG00000010671	BTK PPI subnetwork	0.05	0.900598	SLC38A1 (2.7)	HK3 (1.6)	LRRC34 (1.4)	CDC42 (1.4)	SULT1B1 (1.2)	CD44 (1.2)	FOXO1 (1.2)	SYNE1 (1.2)	TERT (1.1)	UIMC1 (1.0)
GO:0008213	protein alkylation	0.05	0.900598	UIMC1 (2.5)	ZNF346 (2.2)	TERT (2.0)	CUL5 (1.9)	LRRC34 (1.6)	NPAT (1.5)	RIC8A (1.4)	ENSG00000228397 (1.1)	SIRT3 (1.1)	ATM (1.0)
GO:0006479	protein methylation	0.05	0.900598	UIMC1 (2.5)	ZNF346 (2.2)	TERT (2.0)	CUL5 (1.9)	LRRC34 (1.6)	NPAT (1.5)	RIC8A (1.4)	ENSG00000228397 (1.1)	SIRT3 (1.1)	ATM (1.0)
ENSG00000162889	MAPKAPK2 PPI subnetwork	0.05	0.900598	SYNE1 (2.3)	CD44 (1.9)	SLC38A1 (1.7)	OBFC1 (1.4)	CDC42-IT1 (1.3)	ENSG00000226403 (1.2)	BET1L (1.1)	UIMC1 (1.0)	LNX1 (1.0)	ENSG00000228397 (0.9)
ENSG00000100888	CHD8 PPI subnetwork	0.05	0.900598	TNRC6B (3.0)	TERT (1.6)	ENSG00000184378 (1.5)	SLC38A2 (1.5)	ENSG00000228397 (1.3)	LINC00339 (1.3)	UIMC1 (1.3)	MRPS31 (1.1)	FOXO1 (1.1)	CDC42-IT1 (1.0)
ENSG00000108433	GOSR2 PPI subnetwork	0.05	0.900598	COG6 (3.8)	BET1L (3.6)	MYNN (2.3)	ZNF346 (1.7)	SYNE1 (1.6)	LINC00339 (1.3)	WT1-AS (1.2)	DMRT1 (1.2)	WNT4 (1.2)	OBFC1 (1.2)
ENSG00000001497	LAS1L PPI subnetwork	0.05	0.900598	DMRT1 (3.0)	MRPS31 (1.9)	ZNF346 (1.8)	SLC38A1 (1.6)	TNRC6B (1.4)	TERT (1.2)	COG6 (1.1)	KANK1 (1.1)	SLC38A2 (1.1)	NPAT (1.1)
MP:0011320	abnormal glomerular capillary morphology	0.05	0.900598	WT1-AS (9.8)	WNT4 (3.4)	OBFC1 (2.3)	ENSG00000258096 (2.2)	ENSG00000226403 (2.0)	SYNE1 (1.7)	UIMC1 (1.5)	SALL1 (1.4)	KANK1 (1.2)	KDELC2 (1.0)
ENSG00000092108	SCFD1 PPI subnetwork	0.05	0.900598	COG6 (4.2)	BET1L (3.9)	PSMD13 (2.7)	CDC42 (2.3)	SCGB1C1 (1.9)	MRPS31 (1.9)	HK3 (1.5)	CDC42-IT1 (0.8)	CUL5 (0.7)	ENSG00000184378 (0.7)
GO:0035770	ribonucleoprotein granule	0.05	0.900598	DMRT1 (6.3)	C11orf65 (3.3)	TNRC6B (1.9)	CDC42 (1.7)	UIMC1 (1.4)	TERT (1.4)	RIC8A (1.3)	CUL5 (1.1)	FIP1L1 (1.1)	SH3PXD2A (0.9)
GO:0003230	cardiac atrium development	0.05	0.900598	ENSG00000226403 (2.6)	SIRT3 (1.5)	ENSG00000228397 (1.4)	GREB1 (1.4)	ODF3 (1.3)	SLC25A15 (0.9)	ENSG00000184378 (0.9)	TNRC6B (0.8)	EXPH5 (0.7)	ZNF346 (0.7)
GO:0071230	cellular response to amino acid stimulus	0.05	0.900598	LNX1 (3.2)	ENSG00000184378 (2.9)	ODF3 (2.3)	ENSG00000258096 (1.6)	SH3PXD2A (1.4)	ENSG00000226403 (1.4)	C11orf65 (1.3)	FIP1L1 (1.3)	WT1-AS (1.2)	SLC38A2 (1.0)
ENSG00000197561	ELANE PPI subnetwork	0.05	0.900598	HK3 (5.3)	SH3PXD2A (1.6)	SLC38A2 (1.6)	WNT4 (1.4)	CD44 (1.2)	C11orf65 (1.2)	SYNE1 (1.1)	ENSG00000226403 (0.8)	FOXO1 (0.8)	SULT1B1 (0.8)
GO:0006402	mRNA catabolic process	0.05	0.900598	CDC42-IT1 (3.7)	MYNN (3.5)	UIMC1 (3.3)	LINC00339 (2.2)	ENSG00000228397 (2.2)	MRPS31 (2.2)	CUL5 (1.6)	FIP1L1 (1.6)	NPAT (1.2)	FOXO1 (1.0)
GO:0008630	DNA damage response, signal transduction resulting in induction of apoptosis	0.05	0.900598	NPAT (2.6)	ATM (2.5)	TNRC6B (2.5)	KDELC2 (1.6)	ENSG00000228397 (1.4)	MYNN (1.4)	DMRT1 (1.3)	ENSG00000226403 (1.1)	SULT1B1 (0.9)	SH3PXD2A (0.9)
GO:0044454	nuclear chromosome part	0.05	0.900598	NPAT (3.4)	TNRC6B (2.1)	UIMC1 (2.0)	ATM (1.7)	ENSG00000228397 (1.6)	SLC38A2 (1.4)	FIP1L1 (1.3)	ZNF346 (1.3)	MRPS31 (1.1)	CDC42-IT1 (1.1)
ENSG00000110931	CAMKK2 PPI subnetwork	0.05	0.900598	HK3 (2.5)	FOXO1 (2.2)	LRRC34 (1.7)	SLC38A2 (1.7)	ACAT1 (1.6)	COG6 (1.6)	SIRT3 (1.6)	WNT4 (1.6)	ENSG00000184378 (1.4)	SLC25A15 (1.3)
GO:0000291	nuclear-transcribed mRNA catabolic process, exonucleolytic	0.05	0.900598	MRPS31 (3.4)	C11orf65 (2.3)	CDC42-IT1 (2.2)	CUL5 (2.2)	MYNN (2.1)	ATM (1.7)	NPAT (1.7)	ZNF346 (1.6)	SLC25A15 (1.5)	DMRT1 (1.4)
GO:0043928	exonucleolytic nuclear-transcribed mRNA catabolic process involved in deadenylation-dependent decay	0.05	0.900598	MRPS31 (3.4)	C11orf65 (2.3)	CDC42-IT1 (2.2)	CUL5 (2.2)	MYNN (2.1)	ATM (1.7)	NPAT (1.7)	ZNF346 (1.6)	SLC25A15 (1.5)	DMRT1 (1.4)
GO:0043566	structure-specific DNA binding	0.05	0.900598	SLC38A2 (2.5)	MRPS31 (2.0)	WNT4 (1.9)	TERT (1.8)	UIMC1 (1.7)	NPAT (1.6)	LINC00339 (1.5)	ENSG00000258096 (1.5)	TNRC6B (1.4)	ATM (1.2)
REACTOME_CELL_CYCLE_MITOTIC	REACTOME_CELL_CYCLE_MITOTIC	0.05	0.900598	NPAT (2.6)	PSMD13 (2.0)	ATM (1.5)	KDELC2 (1.4)	ZNF346 (1.4)	OBFC1 (1.3)	MRPS31 (1.2)	FIP1L1 (1.0)	UIMC1 (1.0)	ACAT1 (0.9)
GO:0000287	magnesium ion binding	0.05	0.900598	OBFC1 (1.9)	ACAT1 (1.8)	SIRT3 (1.8)	COG6 (1.4)	SULT1B1 (1.3)	NPAT (1.2)	LNX1 (1.2)	LRRC31 (1.2)	HK3 (1.2)	TERT (1.2)
MP:0001785	edema	0.05	0.900598	WT1-AS (4.0)	SALL1 (2.3)	TNRC6B (2.1)	SYNE1 (1.8)	FOXO1 (1.7)	SLC38A2 (1.5)	NPAT (1.1)	KDELC2 (1.0)	ZNF346 (1.0)	KANK1 (0.9)
GO:0009982	pseudouridine synthase activity	0.05	0.900598	CUL5 (3.5)	SLC25A15 (2.7)	MRPS31 (2.3)	C11orf65 (2.1)	KDELC2 (2.1)	ZNF346 (1.9)	MYNN (1.7)	ACAT1 (1.7)	FIP1L1 (1.7)	EXPH5 (1.3)
REACTOME_INTRINSIC_PATHWAY	REACTOME_INTRINSIC_PATHWAY	0.05	0.900598	SCGB1C1 (4.0)	C11orf65 (2.2)	SLC25A15 (2.0)	SIRT3 (1.8)	ACAT1 (1.3)	SALL1 (1.3)	SYNE1 (1.1)	LINC00339 (0.9)	DMRT1 (0.8)	NPAT (0.6)
GO:0051653	spindle localization	0.05	0.900598	ODF3 (2.3)	CUL5 (2.0)	EXPH5 (1.9)	ATM (1.8)	NPAT (1.7)	COG6 (1.6)	SULT1B1 (1.4)	TNRC6B (1.3)	C11orf65 (1.2)	LRRC31 (1.2)
GO:0051293	establishment of spindle localization	0.05	0.900598	ODF3 (2.3)	CUL5 (2.0)	EXPH5 (1.9)	ATM (1.8)	NPAT (1.7)	COG6 (1.6)	SULT1B1 (1.4)	TNRC6B (1.3)	C11orf65 (1.2)	LRRC31 (1.2)
ENSG00000080503	SMARCA2 PPI subnetwork	0.05	0.900598	CUL5 (3.2)	FIP1L1 (3.1)	SCGB1C1 (2.8)	NPAT (2.4)	TNRC6B (2.0)	MRPS31 (1.4)	SLC38A2 (1.3)	ATM (1.2)	DMRT1 (1.1)	SLC38A1 (0.9)
ENSG00000164053	ATRIP PPI subnetwork	0.05	0.900598	NPAT (3.8)	ATM (2.7)	KDELC2 (2.4)	OBFC1 (2.2)	LINC00339 (2.2)	ENSG00000258096 (1.6)	UIMC1 (1.5)	MYNN (1.1)	ENSG00000228397 (1.0)	COG6 (1.0)
GO:0042573	retinoic acid metabolic process	0.05	0.900598	EXPH5 (3.0)	LRRC34 (2.3)	ODF3 (2.2)	ENSG00000228397 (1.8)	TERT (1.8)	LINC00339 (1.7)	WNT4 (1.7)	OBFC1 (1.6)	SULT1B1 (1.4)	ZNF346 (1.3)
GO:0017091	AU-rich element binding	0.05	0.900598	MRPS31 (2.5)	LRRC31 (2.4)	SLC25A15 (2.1)	DMRT1 (1.8)	SLC38A2 (1.7)	SULT1B1 (1.6)	ZNF346 (1.6)	MYNN (1.5)	SH3PXD2A (1.3)	CDC42 (1.2)
MP:0004883	abnormal vascular wound healing	0.05	0.900598	GREB1 (3.3)	KANK1 (3.0)	SALL1 (2.8)	FOXO1 (2.8)	WNT4 (2.2)	ENSG00000228397 (1.9)	CDC42-IT1 (1.6)	SLC38A2 (1.4)	SH3PXD2A (1.3)	TERT (1.2)
GO:0035115	embryonic forelimb morphogenesis	0.05	0.900598	SH3PXD2A (1.8)	EXPH5 (1.8)	TERT (1.7)	SALL1 (1.7)	WNT4 (1.5)	LRRC34 (1.4)	ENSG00000228397 (1.1)	ENSG00000226403 (0.9)	OBFC1 (0.7)	GREB1 (0.7)
GO:0018195	peptidyl-arginine modification	0.05	0.900598	OBFC1 (2.6)	DMRT1 (2.2)	LRRC31 (2.1)	TERT (2.0)	ZNF346 (2.0)	LRRC34 (1.9)	ENSG00000226403 (1.4)	SIRT3 (1.4)	SH3PXD2A (1.0)	RIC8A (0.9)
GO:0007597	blood coagulation, intrinsic pathway	0.05	0.900598	SCGB1C1 (4.6)	C11orf65 (2.8)	SIRT3 (2.0)	SLC25A15 (1.3)	LINC00339 (1.2)	ENSG00000258096 (1.2)	SYNE1 (1.1)	ODF3 (1.1)	DMRT1 (0.9)	NPAT (0.9)
GO:0015030	Cajal body	0.05	0.900598	UIMC1 (2.7)	ZNF346 (2.5)	NPAT (2.4)	FIP1L1 (1.8)	MYNN (1.7)	ATM (1.4)	OBFC1 (1.2)	MRPS31 (1.0)	TERT (0.9)	RIC8A (0.9)
MP:0001859	kidney inflammation	0.05	0.900598	MYNN (2.0)	CD44 (1.5)	SYNE1 (1.5)	FOXO1 (1.2)	GREB1 (0.8)	SLC25A15 (0.7)	WT1-AS (0.6)	KANK1 (0.5)	SH3PXD2A (0.5)	TNRC6B (0.5)
ENSG00000171824	EXOSC10 PPI subnetwork	0.05	0.900598	CUL5 (2.4)	C11orf65 (2.1)	MRPS31 (1.6)	COG6 (1.5)	ENSG00000228397 (1.5)	CDC42-IT1 (1.4)	WT1-AS (1.3)	FIP1L1 (1.2)	RIC8A (1.2)	PSMD13 (1.2)
ENSG00000118046	STK11 PPI subnetwork	0.05	0.900598	FOXO1 (3.5)	DMRT1 (1.9)	TNRC6B (1.6)	ATM (1.5)	OBFC1 (1.3)	NPAT (1.3)	SULT1B1 (1.3)	CDC42-IT1 (1.0)	LNX1 (1.0)	SLC38A2 (0.9)
GO:0007276	gamete generation	0.05	0.900598	ODF3 (5.3)	DMRT1 (4.5)	C11orf65 (3.7)	ENSG00000226403 (2.2)	LRRC34 (2.1)	ENSG00000184378 (1.9)	UIMC1 (1.2)	ENSG00000258096 (1.0)	GREB1 (0.9)	LRRC31 (0.6)
ENSG00000138675	FGF5 PPI subnetwork	0.05	0.900598	LNX1 (2.8)	WNT4 (1.9)	LRRC31 (1.7)	KDELC2 (1.6)	ZNF346 (1.6)	UIMC1 (1.5)	SH3PXD2A (1.4)	ENSG00000184378 (1.4)	ENSG00000258096 (1.3)	TERT (1.3)
GO:0000236	mitotic prometaphase	0.05	0.900598	NPAT (2.6)	KDELC2 (2.2)	ATM (1.7)	COG6 (1.6)	LINC00339 (1.5)	CDC42-IT1 (1.4)	ZNF346 (1.4)	SIRT3 (0.9)	OBFC1 (0.9)	TERT (0.8)
ENSG00000105851	PIK3CG PPI subnetwork	0.05	0.900598	FOXO1 (2.2)	WNT4 (2.2)	HK3 (2.2)	GREB1 (2.1)	SIRT3 (2.0)	SULT1B1 (1.6)	KANK1 (1.5)	RIC8A (1.5)	BET1L (1.4)	C11orf65 (1.1)
GO:0051294	establishment of spindle orientation	0.05	0.900598	CUL5 (3.0)	ODF3 (2.8)	NPAT (2.1)	EXPH5 (1.9)	ATM (1.8)	COG6 (1.7)	MRPS31 (1.2)	ZNF346 (1.2)	FIP1L1 (1.2)	SULT1B1 (1.2)
GO:0000132	establishment of mitotic spindle orientation	0.05	0.900598	CUL5 (3.0)	ODF3 (2.8)	NPAT (2.1)	EXPH5 (1.9)	ATM (1.8)	COG6 (1.7)	MRPS31 (1.2)	ZNF346 (1.2)	FIP1L1 (1.2)	SULT1B1 (1.2)
GO:0033764	steroid dehydrogenase activity, acting on the CH-OH group of donors, NAD or NADP as acceptor	0.05	0.900598	MRPS31 (2.7)	ACAT1 (1.4)	SALL1 (1.4)	LRRC31 (1.3)	C11orf65 (1.3)	LINC00339 (1.3)	SULT1B1 (1.1)	SLC38A1 (1.1)	OBFC1 (1.1)	EXPH5 (1.0)
ENSG00000157456	CCNB2 PPI subnetwork	0.05	0.900598	UIMC1 (3.0)	NPAT (2.6)	ZNF346 (2.2)	CDC42-IT1 (2.2)	ENSG00000228397 (1.7)	CUL5 (1.6)	FOXO1 (1.4)	TERT (1.3)	ATM (1.2)	MYNN (1.0)
GO:0008278	cohesin complex	0.05	0.900598	DMRT1 (4.2)	NPAT (2.5)	C11orf65 (2.0)	OBFC1 (1.6)	FIP1L1 (1.6)	TERT (1.4)	ATM (1.4)	ENSG00000226403 (1.2)	SLC38A1 (1.1)	LRRC34 (1.1)
ENSG00000065328	MCM10 PPI subnetwork	0.05	0.900598	NPAT (4.3)	OBFC1 (1.8)	KDELC2 (1.8)	ATM (1.3)	SLC38A2 (1.3)	ENSG00000228397 (1.2)	TERT (1.2)	WNT4 (1.1)	ACAT1 (1.0)	UIMC1 (0.9)
ENSG00000138663	COPS4 PPI subnetwork	0.05	0.900598	COG6 (4.3)	ACAT1 (2.0)	OBFC1 (1.9)	LINC00339 (1.8)	MRPS31 (1.7)	CDC42 (1.7)	MYNN (1.7)	UIMC1 (1.6)	PSMD13 (1.4)	WNT4 (0.7)
ENSG00000184825	HIST1H2AH PPI subnetwork	0.05	0.900598	SCGB1C1 (3.4)	CUL5 (3.3)	FIP1L1 (2.4)	NPAT (2.0)	ATM (1.9)	DMRT1 (1.8)	MRPS31 (1.5)	SLC38A1 (1.5)	UIMC1 (0.9)	TNRC6B (0.7)
ENSG00000124642	ENSG00000124642 PPI subnetwork	0.05	0.900598	SCGB1C1 (3.4)	CUL5 (3.3)	FIP1L1 (2.4)	NPAT (2.0)	ATM (1.9)	DMRT1 (1.8)	MRPS31 (1.5)	SLC38A1 (1.5)	UIMC1 (0.9)	TNRC6B (0.7)
GO:0071564	npBAF complex	0.05	0.900598	FIP1L1 (2.8)	TNRC6B (2.3)	ENSG00000228397 (1.9)	COG6 (1.5)	ENSG00000226403 (1.4)	DMRT1 (1.3)	WNT4 (1.1)	FOXO1 (1.0)	LNX1 (0.9)	SULT1B1 (0.7)
ENSG00000072195	SPEG PPI subnetwork	0.05	0.900598	TNRC6B (1.9)	COG6 (1.7)	EXPH5 (1.7)	LRRC31 (1.7)	ATM (1.6)	SLC38A2 (1.6)	UIMC1 (1.5)	NPAT (1.4)	SYNE1 (1.4)	HK3 (1.3)
ENSG00000141380	SS18 PPI subnetwork	0.05	0.900598	FIP1L1 (3.1)	TNRC6B (3.1)	ENSG00000228397 (2.5)	DMRT1 (1.8)	UIMC1 (1.5)	LRRC34 (1.4)	ODF3 (1.3)	ENSG00000226403 (1.3)	LNX1 (1.1)	KANK1 (1.1)
REACTOME_NUCLEAR_RECEPTOR_TRANSCRIPTION_PATHWAY	REACTOME_NUCLEAR_RECEPTOR_TRANSCRIPTION_PATHWAY	0.05	0.900598	GREB1 (3.0)	TNRC6B (2.7)	SIRT3 (2.4)	SLC25A15 (2.2)	FOXO1 (2.1)	WT1-AS (1.4)	SH3PXD2A (1.3)	LRRC31 (1.2)	TERT (1.2)	LNX1 (1.1)
ENSG00000206279	DAXX PPI subnetwork	0.05	0.900598	LINC00339 (2.3)	CD44 (2.2)	UIMC1 (2.0)	RIC8A (1.7)	PSMD13 (1.6)	CDC42 (1.4)	FOXO1 (1.3)	CUL5 (1.2)	TNRC6B (1.2)	ZNF346 (1.2)
ENSG00000204209	DAXX PPI subnetwork	0.05	0.900598	LINC00339 (2.3)	CD44 (2.2)	UIMC1 (2.0)	RIC8A (1.7)	PSMD13 (1.6)	CDC42 (1.4)	FOXO1 (1.3)	CUL5 (1.2)	TNRC6B (1.2)	ZNF346 (1.2)
ENSG00000206206	DAXX PPI subnetwork	0.05	0.900598	LINC00339 (2.3)	CD44 (2.2)	UIMC1 (2.0)	RIC8A (1.7)	PSMD13 (1.6)	CDC42 (1.4)	FOXO1 (1.3)	CUL5 (1.2)	TNRC6B (1.2)	ZNF346 (1.2)
MP:0005670	abnormal white adipose tissue physiology	0.05	0.900598	SH3PXD2A (2.1)	FOXO1 (2.1)	WT1-AS (1.9)	KANK1 (1.6)	DMRT1 (1.5)	ACAT1 (1.4)	ENSG00000184378 (1.3)	CD44 (1.2)	LRRC31 (0.9)	FIP1L1 (0.8)
ENSG00000100448	CTSG PPI subnetwork	0.05	0.900598	HK3 (2.9)	SCGB1C1 (2.9)	WNT4 (1.6)	C11orf65 (1.5)	SH3PXD2A (1.4)	SALL1 (1.4)	SLC25A15 (1.1)	COG6 (1.1)	SULT1B1 (0.9)	ENSG00000226403 (0.9)
ENSG00000169398	PTK2 PPI subnetwork	0.05	0.900598	SYNE1 (2.3)	KANK1 (2.1)	HK3 (1.7)	OBFC1 (1.6)	SLC38A2 (1.6)	CD44 (1.6)	MYNN (1.5)	ATM (1.4)	LRRC31 (1.1)	TNRC6B (1.0)
GO:0070461	SAGA-type complex	0.05	0.900598	COG6 (2.3)	FOXO1 (1.7)	UIMC1 (1.6)	ENSG00000226403 (1.6)	MRPS31 (1.4)	RIC8A (1.4)	OBFC1 (1.3)	DMRT1 (1.2)	MYNN (1.1)	SLC25A15 (1.1)
GO:0040029	regulation of gene expression, epigenetic	0.05	0.900598	C11orf65 (3.3)	TERT (2.4)	UIMC1 (2.0)	TNRC6B (1.8)	CUL5 (1.6)	SLC38A1 (1.4)	OBFC1 (1.4)	NPAT (1.3)	ENSG00000184378 (1.2)	BET1L (1.2)
ENSG00000114978	MOB1A PPI subnetwork	0.05	0.900598	CDC42-IT1 (3.7)	RIC8A (2.3)	ENSG00000184378 (2.1)	PSMD13 (1.9)	ZNF346 (1.8)	SYNE1 (1.6)	COG6 (1.6)	UIMC1 (1.5)	CDC42 (1.5)	CD44 (1.4)
GO:0010212	response to ionizing radiation	0.05	0.900598	NPAT (2.3)	ZNF346 (2.2)	OBFC1 (2.1)	MRPS31 (1.9)	ATM (1.6)	UIMC1 (1.5)	MYNN (1.4)	DMRT1 (1.2)	LINC00339 (1.2)	TERT (1.1)
GO:0045815	positive regulation of gene expression, epigenetic	0.05	0.900598	BET1L (1.9)	LRRC34 (1.9)	ENSG00000228397 (1.8)	TERT (1.6)	SULT1B1 (1.4)	LINC00339 (1.4)	C11orf65 (1.1)	TNRC6B (1.0)	SLC38A1 (0.8)	CDC42-IT1 (0.6)
ENSG00000174547	MRPL11 PPI subnetwork	0.05	0.900598	MRPS31 (3.1)	SIRT3 (2.5)	ACAT1 (2.3)	TERT (1.9)	OBFC1 (1.8)	SLC38A1 (1.5)	CUL5 (1.5)	PSMD13 (1.4)	RIC8A (1.3)	WT1-AS (1.2)
ENSG00000181218	HIST3H2A PPI subnetwork	0.05	0.900598	SCGB1C1 (3.4)	CUL5 (3.3)	FIP1L1 (2.5)	NPAT (2.2)	DMRT1 (2.0)	ATM (1.9)	SLC38A1 (1.6)	MRPS31 (1.5)	UIMC1 (0.9)	ENSG00000228397 (0.8)
GO:0006401	RNA catabolic process	0.05	0.900598	MYNN (3.3)	UIMC1 (2.9)	MRPS31 (2.4)	CDC42-IT1 (2.3)	LINC00339 (2.1)	CUL5 (1.9)	ENSG00000228397 (1.8)	ATM (1.8)	FIP1L1 (1.7)	SLC38A1 (1.3)
GO:0016514	SWI/SNF complex	0.05	0.900598	TNRC6B (3.0)	FIP1L1 (2.1)	FOXO1 (2.1)	ENSG00000228397 (1.4)	TERT (1.3)	ENSG00000226403 (1.1)	DMRT1 (1.0)	GREB1 (1.0)	CDC42-IT1 (0.8)	PSMD13 (0.7)
MP:0010984	abnormal metanephric mesenchyme morphology	0.05	0.900598	SALL1 (3.0)	WT1-AS (2.4)	WNT4 (1.6)	SH3PXD2A (1.6)	GREB1 (1.4)	CDC42 (1.2)	BET1L (1.2)	SLC38A1 (1.0)	SYNE1 (1.0)	MYNN (1.0)
MP:0000221	decreased leukocyte cell number	0.05	0.900598	TNRC6B (2.8)	CD44 (2.6)	LRRC34 (2.3)	SLC25A15 (1.8)	FOXO1 (1.6)	SH3PXD2A (1.4)	UIMC1 (1.4)	ATM (1.1)	RIC8A (1.1)	ENSG00000258096 (1.0)
ENSG00000172977	KAT5 PPI subnetwork	0.05	0.900598	FIP1L1 (2.1)	MRPS31 (1.9)	SLC38A2 (1.8)	ENSG00000228397 (1.7)	UIMC1 (1.6)	TNRC6B (1.5)	GREB1 (1.5)	SCGB1C1 (1.4)	NPAT (1.2)	ATM (1.2)
ENSG00000115866	DARS PPI subnetwork	0.05	0.900598	SLC38A2 (2.6)	PSMD13 (2.2)	RIC8A (1.7)	ACAT1 (1.5)	ATM (1.4)	MRPS31 (1.3)	SLC38A1 (0.9)	TERT (0.9)	KANK1 (0.9)	WT1-AS (0.8)
ENSG00000136982	DSCC1 PPI subnetwork	0.05	0.900598	CDC42 (2.4)	KDELC2 (1.8)	OBFC1 (1.8)	UIMC1 (1.8)	COG6 (1.4)	MYNN (1.3)	PSMD13 (1.3)	ATM (1.2)	CDC42-IT1 (1.2)	FIP1L1 (1.2)
GO:0007067	mitosis	0.05	0.900598	KDELC2 (3.1)	NPAT (2.7)	ATM (2.0)	OBFC1 (1.8)	COG6 (1.5)	CUL5 (1.4)	ZNF346 (1.4)	FIP1L1 (1.3)	CDC42-IT1 (1.2)	TERT (1.1)
GO:0000280	nuclear division	0.05	0.900598	KDELC2 (3.1)	NPAT (2.7)	ATM (2.0)	OBFC1 (1.8)	COG6 (1.5)	CUL5 (1.4)	ZNF346 (1.4)	FIP1L1 (1.3)	CDC42-IT1 (1.2)	TERT (1.1)
GO:0016616	oxidoreductase activity, acting on the CH-OH group of donors, NAD or NADP as acceptor	0.05	0.900598	ACAT1 (4.2)	SULT1B1 (2.3)	LRRC31 (1.8)	MRPS31 (1.3)	SLC25A15 (1.2)	LNX1 (1.2)	EXPH5 (1.1)	OBFC1 (0.9)	CDC42-IT1 (0.9)	WNT4 (0.9)
ENSG00000170515	PA2G4 PPI subnetwork	0.05	0.900598	RIC8A (2.6)	PSMD13 (2.0)	FOXO1 (1.7)	ENSG00000226403 (1.6)	LRRC31 (1.4)	UIMC1 (1.3)	CDC42-IT1 (1.2)	SIRT3 (1.1)	TNRC6B (1.1)	NPAT (1.1)
GO:0001658	branching involved in ureteric bud morphogenesis	0.05	0.900598	WT1-AS (4.8)	SALL1 (3.4)	WNT4 (3.4)	ENSG00000228397 (3.1)	KANK1 (2.2)	GREB1 (1.8)	ENSG00000258096 (1.2)	SIRT3 (1.2)	BET1L (0.9)	RIC8A (0.8)
ENSG00000107882	SUFU PPI subnetwork	0.05	0.900598	SH3PXD2A (2.5)	TNRC6B (2.3)	C11orf65 (2.3)	SLC38A2 (1.9)	LRRC34 (1.6)	LRRC31 (1.5)	DMRT1 (1.4)	WT1-AS (1.3)	CDC42 (0.8)	HK3 (0.7)
ENSG00000164171	ITGA2 PPI subnetwork	0.05	0.900598	SLC38A2 (2.8)	SLC38A1 (2.1)	WNT4 (2.1)	LNX1 (1.6)	KANK1 (1.4)	ENSG00000258096 (1.2)	ODF3 (1.1)	LRRC34 (1.1)	SH3PXD2A (1.1)	SCGB1C1 (1.1)
ENSG00000152455	SUV39H2 PPI subnetwork	0.05	0.900598	LRRC34 (1.9)	CUL5 (1.6)	RIC8A (1.5)	FIP1L1 (1.5)	ATM (1.5)	DMRT1 (1.3)	TNRC6B (1.2)	ENSG00000226403 (1.0)	LRRC31 (1.0)	SALL1 (0.9)
ENSG00000198467	TPM2 PPI subnetwork	0.05	0.900598	KANK1 (2.1)	RIC8A (1.8)	SLC38A2 (1.7)	EXPH5 (1.7)	PSMD13 (1.1)	KDELC2 (1.1)	CDC42 (1.0)	SCGB1C1 (1.0)	SULT1B1 (0.9)	ENSG00000184378 (0.9)
ENSG00000150630	VEGFC PPI subnetwork	0.05	0.900598	HK3 (4.0)	SLC38A2 (2.4)	SULT1B1 (2.1)	SYNE1 (1.7)	LNX1 (1.6)	WT1-AS (1.4)	LRRC31 (1.3)	MYNN (1.3)	GREB1 (1.1)	UIMC1 (1.1)
ENSG00000153391	INO80C PPI subnetwork	0.05	0.900598	DMRT1 (2.3)	UIMC1 (2.1)	MRPS31 (1.9)	WT1-AS (1.4)	FOXO1 (1.4)	ATM (1.3)	FIP1L1 (1.1)	PSMD13 (1.0)	ENSG00000184378 (0.9)	SLC38A2 (0.9)
ENSG00000165197	FIGF PPI subnetwork	0.05	0.900598	HK3 (3.6)	SLC38A2 (2.4)	SYNE1 (2.3)	MYNN (1.8)	SULT1B1 (1.5)	LNX1 (1.3)	LRRC31 (1.0)	C11orf65 (1.0)	ENSG00000228397 (1.0)	GREB1 (1.0)
MP:0001273	decreased metastatic potential	0.05	0.900598	CD44 (2.6)	HK3 (2.4)	SULT1B1 (1.4)	SH3PXD2A (1.3)	UIMC1 (1.3)	SYNE1 (1.1)	ENSG00000228397 (1.0)	ENSG00000258096 (0.8)	CDC42-IT1 (0.7)	TERT (0.6)
REACTOME_INTEGRIN_ALPHAIIB_BETA3_SIGNALING	REACTOME_INTEGRIN_ALPHAIIB_BETA3_SIGNALING	0.05	0.900598	KANK1 (1.5)	SYNE1 (1.2)	COG6 (1.2)	GREB1 (1.1)	HK3 (1.1)	SLC25A15 (0.9)	SALL1 (0.8)	ENSG00000258096 (0.8)	LRRC34 (0.7)	UIMC1 (0.7)
ENSG00000100479	POLE2 PPI subnetwork	0.05	0.900598	NPAT (2.8)	ATM (2.1)	KANK1 (2.0)	OBFC1 (1.8)	SCGB1C1 (1.7)	FIP1L1 (1.7)	KDELC2 (1.6)	SLC38A2 (1.5)	DMRT1 (1.4)	UIMC1 (1.0)
ENSG00000064961	HMG20B PPI subnetwork	0.05	0.900598	FIP1L1 (3.2)	LINC00339 (3.1)	ZNF346 (2.2)	UIMC1 (1.9)	CUL5 (1.6)	ENSG00000228397 (1.5)	SLC25A15 (1.3)	TERT (1.3)	DMRT1 (1.2)	OBFC1 (1.2)
ENSG00000025293	PHF20 PPI subnetwork	0.05	0.900598	ENSG00000228397 (2.8)	DMRT1 (2.7)	MRPS31 (1.9)	COG6 (1.2)	TNRC6B (1.0)	UIMC1 (1.0)	FIP1L1 (1.0)	BET1L (1.0)	SCGB1C1 (0.9)	SLC38A2 (0.8)
REACTOME_MITOTIC_M:MG1_PHASES	REACTOME_MITOTIC_M:MG1_PHASES	0.05	0.900598	PSMD13 (3.0)	NPAT (2.5)	KDELC2 (1.3)	ZNF346 (1.0)	ACAT1 (1.0)	ATM (1.0)	MRPS31 (0.9)	LINC00339 (0.7)	ENSG00000228397 (0.7)	MYNN (0.6)
GO:0000217	DNA secondary structure binding	0.05	0.900598	NPAT (3.1)	MRPS31 (2.8)	FIP1L1 (2.5)	DMRT1 (2.3)	CDC42-IT1 (2.3)	TERT (1.7)	UIMC1 (1.7)	ATM (1.6)	OBFC1 (1.6)	RIC8A (1.4)
ENSG00000135972	MRPS9 PPI subnetwork	0.05	0.900598	SLC25A15 (1.8)	MRPS31 (1.7)	ODF3 (1.7)	SH3PXD2A (1.4)	WT1-AS (1.3)	CUL5 (1.2)	LINC00339 (1.0)	ACAT1 (0.9)	RIC8A (0.9)	COG6 (0.8)
GO:0035113	embryonic appendage morphogenesis	0.05	0.900598	SALL1 (3.1)	LRRC34 (2.4)	ENSG00000228397 (1.7)	GREB1 (1.5)	EXPH5 (1.5)	SH3PXD2A (1.4)	WNT4 (1.4)	TNRC6B (1.4)	TERT (1.2)	ATM (1.0)
GO:0030326	embryonic limb morphogenesis	0.05	0.900598	SALL1 (3.1)	LRRC34 (2.4)	ENSG00000228397 (1.7)	GREB1 (1.5)	EXPH5 (1.5)	SH3PXD2A (1.4)	WNT4 (1.4)	TNRC6B (1.4)	TERT (1.2)	ATM (1.0)
MP:0000681	abnormal thyroid gland morphology	0.05	0.900598	SALL1 (3.6)	CD44 (2.2)	WT1-AS (2.0)	SLC25A15 (1.9)	ENSG00000184378 (1.6)	GREB1 (1.6)	SLC38A1 (1.4)	WNT4 (1.2)	SULT1B1 (1.1)	ENSG00000228397 (1.0)
GO:0000725	recombinational repair	0.05	0.900598	NPAT (3.5)	KDELC2 (3.3)	OBFC1 (3.0)	TERT (3.0)	LINC00339 (2.5)	ZNF346 (2.4)	ATM (2.3)	UIMC1 (2.0)	CDC42-IT1 (1.9)	MRPS31 (1.3)
MP:0001417	decreased exploration in new environment	0.05	0.900598	CD44 (2.2)	SYNE1 (2.2)	SLC38A1 (1.9)	ATM (1.4)	WT1-AS (1.2)	SH3PXD2A (1.2)	WNT4 (1.2)	LRRC31 (1.1)	ENSG00000228397 (1.0)	TERT (0.9)
ENSG00000034152	MAP2K3 PPI subnetwork	0.05	0.900598	SULT1B1 (2.0)	LNX1 (2.0)	DMRT1 (2.0)	SYNE1 (2.0)	SIRT3 (1.5)	COG6 (1.3)	HK3 (1.1)	CUL5 (0.9)	ENSG00000184378 (0.7)	KANK1 (0.7)
ENSG00000067048	DDX3Y PPI subnetwork	0.05	0.900598	FIP1L1 (2.4)	MRPS31 (2.3)	TERT (1.5)	ATM (1.1)	PSMD13 (1.1)	DMRT1 (1.1)	KANK1 (1.1)	FOXO1 (1.0)	UIMC1 (1.0)	OBFC1 (0.9)
ENSG00000077348	EXOSC5 PPI subnetwork	0.05	0.900598	RIC8A (2.7)	PSMD13 (2.4)	COG6 (2.4)	MRPS31 (2.0)	KANK1 (1.2)	SLC25A15 (1.1)	TERT (1.1)	FIP1L1 (1.1)	ENSG00000228397 (1.0)	ATM (0.8)
ENSG00000166848	TERF2IP PPI subnetwork	0.05	0.900598	ENSG00000228397 (1.7)	OBFC1 (1.4)	UIMC1 (1.3)	TNRC6B (1.3)	NPAT (1.3)	ATM (1.2)	CDC42-IT1 (1.2)	ENSG00000258096 (1.1)	ENSG00000226403 (1.0)	TERT (1.0)
GO:0010574	regulation of vascular endothelial growth factor production	0.05	0.900598	ZNF346 (2.9)	TERT (2.2)	SIRT3 (1.9)	MYNN (1.5)	KANK1 (1.3)	ENSG00000184378 (1.3)	LINC00339 (1.3)	ENSG00000226403 (1.2)	SULT1B1 (1.2)	UIMC1 (1.1)
GO:0010573	vascular endothelial growth factor production	0.05	0.900598	ZNF346 (2.9)	TERT (2.2)	SIRT3 (1.9)	MYNN (1.5)	KANK1 (1.3)	ENSG00000184378 (1.3)	LINC00339 (1.3)	ENSG00000226403 (1.2)	SULT1B1 (1.2)	UIMC1 (1.1)
ENSG00000051180	RAD51 PPI subnetwork	0.05	0.900598	ATM (4.0)	NPAT (3.4)	LINC00339 (2.1)	OBFC1 (2.0)	TERT (1.9)	KDELC2 (1.7)	UIMC1 (1.3)	MRPS31 (1.2)	ZNF346 (1.2)	SIRT3 (1.0)
GO:0032200	telomere organization	0.05	0.900598	TERT (3.6)	OBFC1 (3.4)	ATM (3.2)	NPAT (3.2)	ENSG00000228397 (2.9)	KDELC2 (2.0)	ZNF346 (1.3)	MRPS31 (1.3)	UIMC1 (1.3)	LINC00339 (1.2)
ENSG00000196455	PIK3R4 PPI subnetwork	0.05	0.900598	HK3 (2.3)	GREB1 (2.0)	WNT4 (2.0)	C11orf65 (1.7)	CDC42 (1.6)	LRRC31 (1.5)	SULT1B1 (1.4)	FOXO1 (1.4)	UIMC1 (1.2)	SLC38A2 (1.1)
REACTOME_DNA_REPLICATION	REACTOME_DNA_REPLICATION	0.06	0.900598	NPAT (2.7)	PSMD13 (2.7)	KDELC2 (1.4)	ATM (1.1)	MRPS31 (1.1)	ZNF346 (1.0)	ENSG00000228397 (0.8)	ACAT1 (0.8)	SLC38A2 (0.7)	LINC00339 (0.7)
ENSG00000133119	RFC3 PPI subnetwork	0.06	0.900598	NPAT (3.3)	OBFC1 (2.8)	KDELC2 (1.9)	DMRT1 (1.6)	PSMD13 (1.6)	ATM (1.5)	COG6 (1.3)	MRPS31 (1.2)	UIMC1 (1.0)	ZNF346 (0.8)
ENSG00000184381	PLA2G6 PPI subnetwork	0.06	0.900598	LINC00339 (3.0)	CD44 (2.7)	ENSG00000258096 (1.9)	PSMD13 (1.8)	DMRT1 (1.7)	SIRT3 (1.5)	CDC42-IT1 (1.3)	ATM (1.2)	KDELC2 (1.1)	SULT1B1 (1.0)
ENSG00000171311	EXOSC1 PPI subnetwork	0.06	0.900598	MRPS31 (2.6)	COG6 (2.0)	ATM (1.8)	ENSG00000228397 (1.5)	FIP1L1 (1.4)	NPAT (1.3)	RIC8A (1.3)	FOXO1 (1.1)	WT1-AS (0.9)	MYNN (0.9)
GO:0016790	thiolester hydrolase activity	0.06	0.900598	CUL5 (2.6)	SIRT3 (2.5)	SLC25A15 (2.3)	CDC42 (1.8)	MRPS31 (1.6)	LNX1 (1.5)	DMRT1 (1.4)	FIP1L1 (1.3)	ACAT1 (1.2)	ENSG00000226403 (1.1)
GO:0007093	mitotic cell cycle checkpoint	0.06	0.900598	PSMD13 (2.6)	MRPS31 (2.3)	CUL5 (2.3)	COG6 (1.8)	ZNF346 (1.5)	ENSG00000228397 (1.5)	MYNN (1.3)	CDC42 (1.3)	NPAT (1.2)	RIC8A (1.2)
MP:0005318	decreased triglyceride level	0.06	0.900598	LRRC31 (2.4)	FOXO1 (2.3)	ACAT1 (2.2)	SULT1B1 (1.9)	SCGB1C1 (1.9)	WT1-AS (1.7)	KANK1 (1.7)	ENSG00000228397 (1.6)	LNX1 (1.5)	SH3PXD2A (1.5)
ENSG00000136352	NKX2-1 PPI subnetwork	0.06	0.900598	TNRC6B (2.9)	KANK1 (2.4)	ENSG00000226403 (2.1)	WT1-AS (2.0)	FOXO1 (2.0)	SALL1 (1.8)	SYNE1 (1.8)	SH3PXD2A (1.6)	MYNN (1.3)	SULT1B1 (1.1)
ENSG00000136574	GATA4 PPI subnetwork	0.06	0.900598	TNRC6B (4.0)	TERT (1.7)	WT1-AS (1.5)	CDC42-IT1 (1.4)	LINC00339 (1.3)	SLC38A1 (1.2)	NPAT (1.2)	SYNE1 (1.0)	ENSG00000228397 (0.9)	SALL1 (0.9)
ENSG00000189060	H1F0 PPI subnetwork	0.06	0.900598	LINC00339 (2.5)	RIC8A (2.0)	MRPS31 (1.9)	LRRC31 (1.8)	CDC42-IT1 (1.7)	SULT1B1 (1.5)	SLC25A15 (1.4)	KANK1 (1.1)	SLC38A2 (1.0)	TERT (1.0)
MP:0000688	lymphoid hyperplasia	0.06	0.900598	SLC38A1 (2.8)	NPAT (2.5)	MYNN (2.2)	ENSG00000184378 (2.0)	TNRC6B (1.7)	KDELC2 (1.6)	ENSG00000228397 (1.5)	FOXO1 (1.4)	ACAT1 (1.2)	SH3PXD2A (1.2)
REACTOME_G2M_TRANSITION	REACTOME_G2M_TRANSITION	0.06	0.900598	OBFC1 (2.4)	ATM (1.8)	UIMC1 (1.7)	ZNF346 (1.6)	LRRC34 (1.5)	SIRT3 (1.5)	NPAT (1.4)	CDC42-IT1 (1.2)	ENSG00000226403 (1.2)	TERT (1.1)
ENSG00000147082	CCNB3 PPI subnetwork	0.06	0.900598	UIMC1 (2.3)	SLC38A2 (2.1)	WNT4 (2.0)	KDELC2 (1.7)	MRPS31 (1.6)	FIP1L1 (1.5)	ZNF346 (1.4)	FOXO1 (1.2)	SLC25A15 (1.1)	MYNN (1.1)
MP:0004029	spontaneous chromosome breakage	0.06	0.900598	NPAT (4.2)	ATM (2.9)	CUL5 (2.8)	MYNN (2.6)	LINC00339 (2.2)	TERT (2.0)	MRPS31 (1.9)	LNX1 (1.9)	LRRC34 (1.7)	C11orf65 (1.7)
GO:0021983	pituitary gland development	0.06	0.900598	ENSG00000258096 (2.6)	SALL1 (2.0)	ENSG00000228397 (1.9)	ODF3 (1.7)	SLC38A1 (1.7)	WNT4 (1.6)	TERT (1.2)	LRRC34 (1.1)	LNX1 (1.1)	SULT1B1 (1.1)
ENSG00000108256	NUFIP2 PPI subnetwork	0.06	0.900598	TNRC6B (3.8)	ZNF346 (1.7)	ENSG00000228397 (1.5)	ENSG00000258096 (1.3)	BET1L (1.3)	DMRT1 (1.1)	FOXO1 (1.1)	SCGB1C1 (1.0)	SH3PXD2A (0.9)	KANK1 (0.9)
ENSG00000160199	PKNOX1 PPI subnetwork	0.06	0.900598	WT1-AS (3.4)	SALL1 (1.9)	EXPH5 (1.3)	MYNN (1.3)	KDELC2 (1.3)	LRRC31 (1.2)	GREB1 (1.1)	SH3PXD2A (1.1)	WNT4 (1.0)	TNRC6B (1.0)
GO:0016702	oxidoreductase activity, acting on single donors with incorporation of molecular oxygen, incorporation of two atoms of oxygen	0.06	0.900598	SULT1B1 (2.0)	LRRC34 (1.7)	SIRT3 (1.6)	ODF3 (1.3)	SALL1 (1.3)	ENSG00000226403 (1.2)	KDELC2 (1.1)	SYNE1 (1.1)	CDC42-IT1 (1.1)	SH3PXD2A (1.0)
GO:0000724	double-strand break repair via homologous recombination	0.06	0.900598	NPAT (3.5)	TERT (3.1)	KDELC2 (3.1)	OBFC1 (3.0)	ATM (2.4)	LINC00339 (2.4)	ZNF346 (2.2)	UIMC1 (2.0)	CDC42-IT1 (1.9)	MRPS31 (1.3)
GO:0007140	male meiosis	0.06	0.900598	DMRT1 (4.9)	ENSG00000226403 (3.9)	C11orf65 (2.7)	LRRC34 (2.2)	ZNF346 (2.0)	ENSG00000184378 (1.9)	COG6 (1.7)	UIMC1 (1.3)	ATM (1.2)	ENSG00000228397 (0.9)
ENSG00000111652	COPS7A PPI subnetwork	0.06	0.900598	MYNN (3.9)	COG6 (3.0)	MRPS31 (2.6)	NPAT (2.2)	EXPH5 (1.9)	ACAT1 (1.2)	OBFC1 (0.9)	LNX1 (0.9)	ZNF346 (0.9)	CDC42 (0.8)
ENSG00000163956	LRPAP1 PPI subnetwork	0.06	0.900598	TNRC6B (2.2)	SLC38A2 (1.8)	KANK1 (1.6)	SLC38A1 (1.6)	SYNE1 (1.5)	GREB1 (1.5)	CD44 (1.4)	OBFC1 (1.3)	BET1L (1.2)	ENSG00000226403 (1.2)
GO:0035964	COPI-coated vesicle budding	0.06	0.900598	COG6 (6.3)	BET1L (5.9)	ENSG00000258096 (2.9)	ATM (2.1)	RIC8A (1.9)	MYNN (1.6)	CUL5 (1.6)	C11orf65 (1.5)	ZNF346 (1.3)	LRRC31 (1.3)
GO:0048205	COPI coating of Golgi vesicle	0.06	0.900598	COG6 (6.3)	BET1L (5.9)	ENSG00000258096 (2.9)	ATM (2.1)	RIC8A (1.9)	MYNN (1.6)	CUL5 (1.6)	C11orf65 (1.5)	ZNF346 (1.3)	LRRC31 (1.3)
GO:0048200	Golgi transport vesicle coating	0.06	0.900598	COG6 (6.3)	BET1L (5.9)	ENSG00000258096 (2.9)	ATM (2.1)	RIC8A (1.9)	MYNN (1.6)	CUL5 (1.6)	C11orf65 (1.5)	ZNF346 (1.3)	LRRC31 (1.3)
ENSG00000119953	SMNDC1 PPI subnetwork	0.06	0.900598	FIP1L1 (2.0)	PSMD13 (1.8)	SYNE1 (1.7)	UIMC1 (1.4)	ATM (1.4)	MRPS31 (1.3)	OBFC1 (1.3)	C11orf65 (1.1)	SH3PXD2A (1.1)	KDELC2 (1.1)
GO:0004518	nuclease activity	0.06	0.900598	OBFC1 (3.4)	MRPS31 (2.5)	ATM (2.5)	TERT (2.1)	UIMC1 (1.7)	ZNF346 (1.6)	MYNN (1.6)	SLC25A15 (1.2)	NPAT (1.1)	FIP1L1 (1.0)
GO:0007492	endoderm development	0.06	0.900598	CDC42-IT1 (2.6)	LINC00339 (2.4)	OBFC1 (1.9)	SALL1 (1.4)	ENSG00000228397 (1.3)	GREB1 (1.2)	ENSG00000184378 (1.2)	SCGB1C1 (1.2)	ENSG00000226403 (1.1)	TERT (0.9)
ENSG00000147443	DOK2 PPI subnetwork	0.06	0.900598	CUL5 (1.8)	COG6 (1.8)	ENSG00000184378 (1.5)	LRRC34 (1.4)	LNX1 (1.3)	TNRC6B (1.3)	ODF3 (1.2)	GREB1 (1.0)	TERT (1.0)	ATM (1.0)
ENSG00000157557	ETS2 PPI subnetwork	0.06	0.900598	TNRC6B (3.6)	FIP1L1 (2.2)	SYNE1 (1.5)	TERT (1.5)	LNX1 (1.5)	CDC42-IT1 (1.3)	FOXO1 (1.1)	SLC38A2 (1.0)	HK3 (1.0)	WT1-AS (0.9)
GO:0006903	vesicle targeting	0.06	0.900598	BET1L (6.2)	COG6 (6.1)	RIC8A (2.2)	MYNN (1.6)	CDC42-IT1 (1.4)	ENSG00000258096 (1.3)	TERT (1.1)	PSMD13 (1.1)	ACAT1 (1.1)	ZNF346 (0.9)
GO:0042623	ATPase activity, coupled	0.06	0.900598	ATM (2.2)	SYNE1 (2.0)	FIP1L1 (1.9)	TERT (1.9)	CUL5 (1.6)	NPAT (1.6)	UIMC1 (1.4)	DMRT1 (1.3)	LRRC34 (0.8)	TNRC6B (0.7)
GO:0015879	carnitine transport	0.06	0.900598	ZNF346 (2.8)	SLC25A15 (2.5)	ENSG00000228397 (2.4)	LINC00339 (2.2)	SIRT3 (2.0)	COG6 (2.0)	SULT1B1 (1.7)	CUL5 (1.7)	ACAT1 (1.5)	UIMC1 (1.4)
GO:0015838	betaine transport	0.06	0.900598	ZNF346 (2.8)	SLC25A15 (2.5)	ENSG00000228397 (2.4)	LINC00339 (2.2)	SIRT3 (2.0)	COG6 (2.0)	SULT1B1 (1.7)	CUL5 (1.7)	ACAT1 (1.5)	UIMC1 (1.4)
GO:0035136	forelimb morphogenesis	0.06	0.900598	SALL1 (2.3)	ENSG00000228397 (1.9)	LRRC34 (1.6)	TERT (1.5)	GREB1 (1.5)	SH3PXD2A (1.2)	WNT4 (1.0)	DMRT1 (0.8)	EXPH5 (0.8)	LNX1 (0.7)
ENSG00000125686	MED1 PPI subnetwork	0.06	0.900598	TNRC6B (3.3)	MRPS31 (2.2)	FOXO1 (2.0)	BET1L (1.9)	CUL5 (1.7)	RIC8A (1.6)	NPAT (1.4)	SLC25A15 (1.4)	TERT (1.3)	ZNF346 (1.2)
MP:0001585	hemolytic anemia	0.06	0.900598	SLC25A15 (2.6)	RIC8A (1.7)	OBFC1 (1.7)	ODF3 (1.4)	LNX1 (1.3)	CD44 (1.2)	SIRT3 (1.2)	TNRC6B (1.2)	LRRC34 (1.0)	SYNE1 (0.8)
ENSG00000164754	RAD21 PPI subnetwork	0.06	0.900598	ATM (3.4)	FIP1L1 (3.3)	NPAT (3.0)	CUL5 (2.6)	TNRC6B (2.0)	TERT (1.9)	SYNE1 (1.4)	MYNN (1.3)	SLC38A1 (1.3)	SLC38A2 (1.3)
MP:0004154	renal tubular necrosis	0.06	0.900598	SLC25A15 (3.4)	ENSG00000228397 (2.2)	HK3 (1.7)	ATM (1.6)	LNX1 (1.4)	ENSG00000226403 (1.2)	TERT (1.1)	WT1-AS (1.1)	FOXO1 (1.0)	ENSG00000184378 (1.0)
GO:0048806	genitalia development	0.06	0.900598	WT1-AS (3.0)	WNT4 (2.4)	DMRT1 (2.3)	ODF3 (2.3)	ENSG00000184378 (1.9)	SALL1 (1.6)	SH3PXD2A (1.6)	GREB1 (1.5)	LRRC31 (1.2)	LNX1 (1.2)
ENSG00000109846	CRYAB PPI subnetwork	0.06	0.900598	KANK1 (2.5)	SULT1B1 (2.0)	ENSG00000226403 (2.0)	SLC38A1 (1.8)	ENSG00000228397 (1.8)	LNX1 (1.3)	SYNE1 (1.2)	CDC42-IT1 (1.1)	C11orf65 (1.0)	CD44 (0.7)
ENSG00000135999	EPC2 PPI subnetwork	0.06	0.900598	MYNN (2.1)	UIMC1 (1.7)	LINC00339 (1.5)	MRPS31 (1.3)	FIP1L1 (1.3)	PSMD13 (1.2)	TERT (1.1)	GREB1 (1.1)	COG6 (1.0)	SLC38A2 (0.7)
ENSG00000151090	THRB PPI subnetwork	0.06	0.900598	TNRC6B (2.4)	UIMC1 (2.4)	ATM (2.1)	OBFC1 (2.0)	PSMD13 (1.9)	MRPS31 (1.6)	SIRT3 (1.5)	FOXO1 (1.2)	ACAT1 (1.1)	CDC42-IT1 (1.0)
ENSG00000132664	POLR3F PPI subnetwork	0.06	0.900598	NPAT (2.5)	RIC8A (1.9)	KANK1 (1.8)	ENSG00000226403 (1.5)	MRPS31 (1.5)	ZNF346 (1.4)	BET1L (1.2)	GREB1 (1.2)	SLC25A15 (0.9)	SLC38A1 (0.9)
ENSG00000050820	BCAR1 PPI subnetwork	0.06	0.900598	KANK1 (3.1)	TERT (2.2)	SH3PXD2A (2.2)	FOXO1 (1.9)	HK3 (1.4)	SLC38A1 (1.4)	ODF3 (1.3)	C11orf65 (1.3)	WNT4 (1.3)	EXPH5 (1.2)
GO:0030126	COPI vesicle coat	0.06	0.900598	BET1L (5.0)	COG6 (4.7)	ATM (2.9)	ACAT1 (2.1)	RIC8A (1.7)	MYNN (1.6)	NPAT (1.6)	KDELC2 (1.5)	ENSG00000258096 (1.3)	MRPS31 (1.2)
GO:0005801	cis-Golgi network	0.06	0.900598	COG6 (5.2)	MRPS31 (3.1)	KDELC2 (2.9)	BET1L (2.3)	ENSG00000184378 (2.2)	EXPH5 (1.9)	CUL5 (1.9)	SLC25A15 (1.7)	UIMC1 (1.5)	ENSG00000258096 (1.4)
ENSG00000102387	TAF7L PPI subnetwork	0.06	0.900598	SLC38A2 (2.6)	DMRT1 (2.4)	TNRC6B (1.8)	CDC42-IT1 (1.7)	ATM (1.7)	FIP1L1 (1.5)	COG6 (1.4)	CUL5 (1.4)	ZNF346 (1.3)	SLC25A15 (1.3)
ENSG00000160310	PRMT2 PPI subnetwork	0.06	0.900598	GREB1 (5.9)	FOXO1 (2.7)	TNRC6B (2.4)	SLC25A15 (2.0)	DMRT1 (1.4)	C11orf65 (1.3)	CDC42-IT1 (1.3)	SIRT3 (1.2)	ENSG00000226403 (1.2)	WNT4 (1.1)
ENSG00000103351	CLUAP1 PPI subnetwork	0.06	0.900598	DMRT1 (2.6)	COG6 (2.3)	CUL5 (2.2)	LNX1 (1.6)	SYNE1 (1.5)	NPAT (1.5)	ATM (1.4)	MYNN (1.4)	CD44 (1.4)	CDC42 (1.0)
GO:0006595	polyamine metabolic process	0.06	0.900598	SCGB1C1 (2.7)	CDC42-IT1 (2.4)	ENSG00000226403 (1.8)	ZNF346 (1.7)	DMRT1 (1.5)	LNX1 (1.4)	ENSG00000184378 (1.2)	BET1L (1.2)	COG6 (1.1)	GREB1 (1.1)
GO:0010038	response to metal ion	0.06	0.900598	CDC42-IT1 (2.5)	SLC25A15 (2.1)	ACAT1 (1.6)	SULT1B1 (1.5)	SLC38A2 (1.1)	WNT4 (1.1)	TNRC6B (1.1)	KANK1 (1.0)	LRRC34 (1.0)	HK3 (0.9)
ENSG00000006634	DBF4 PPI subnetwork	0.06	0.900598	NPAT (4.5)	ATM (1.8)	OBFC1 (1.8)	KDELC2 (1.6)	MRPS31 (1.3)	ENSG00000228397 (1.2)	LINC00339 (1.0)	LRRC31 (0.9)	UIMC1 (0.9)	TERT (0.8)
GO:0030728	ovulation	0.06	0.900598	GREB1 (4.0)	ENSG00000258096 (2.7)	LRRC34 (2.4)	SYNE1 (1.5)	KANK1 (1.3)	SLC38A2 (1.2)	DMRT1 (1.2)	ODF3 (1.2)	LNX1 (1.2)	EXPH5 (1.2)
MP:0000702	enlarged lymph nodes	0.06	0.900598	CD44 (2.2)	SLC38A1 (2.1)	WT1-AS (1.9)	FOXO1 (1.7)	LRRC34 (1.4)	HK3 (1.3)	LRRC31 (1.1)	SH3PXD2A (1.0)	GREB1 (0.6)	CDC42-IT1 (0.5)
GO:0048194	Golgi vesicle budding	0.06	0.900598	COG6 (6.3)	BET1L (5.7)	MYNN (2.8)	ENSG00000258096 (2.6)	RIC8A (1.9)	ATM (1.9)	CUL5 (1.8)	LRRC31 (1.6)	ZNF346 (1.4)	C11orf65 (1.3)
GO:0030660	Golgi-associated vesicle membrane	0.06	0.900598	BET1L (5.1)	COG6 (4.7)	ATM (2.6)	LINC00339 (2.1)	MYNN (2.0)	LNX1 (1.9)	RIC8A (1.7)	CUL5 (1.6)	ACAT1 (1.3)	SYNE1 (1.2)
GO:0042542	response to hydrogen peroxide	0.06	0.900598	ENSG00000226403 (3.1)	HK3 (2.2)	KANK1 (2.0)	WT1-AS (1.6)	SALL1 (1.4)	DMRT1 (1.4)	KDELC2 (0.9)	ENSG00000258096 (0.9)	SLC38A2 (0.9)	ACAT1 (0.8)
REACTOME_EARLY_PHASE_OF_HIV_LIFE_CYCLE	REACTOME_EARLY_PHASE_OF_HIV_LIFE_CYCLE	0.06	0.900598	FIP1L1 (2.0)	NPAT (1.8)	MRPS31 (1.5)	OBFC1 (1.4)	FOXO1 (1.2)	DMRT1 (1.2)	COG6 (1.2)	ATM (1.0)	HK3 (1.0)	TNRC6B (0.9)
MP:0011290	decreased nephron number	0.06	0.900598	SALL1 (4.1)	WNT4 (3.2)	SCGB1C1 (1.8)	WT1-AS (1.7)	SLC38A1 (1.6)	SYNE1 (1.6)	MYNN (1.5)	SH3PXD2A (1.5)	ENSG00000228397 (1.4)	ENSG00000226403 (1.0)
GO:0000087	M phase of mitotic cell cycle	0.06	0.900598	KDELC2 (3.1)	NPAT (2.6)	ATM (2.0)	OBFC1 (1.8)	ZNF346 (1.5)	CUL5 (1.4)	COG6 (1.4)	FIP1L1 (1.3)	CDC42-IT1 (1.2)	UIMC1 (1.1)
MP:0006413	increased T cell apoptosis	0.06	0.900598	MYNN (2.1)	FOXO1 (1.8)	WT1-AS (1.7)	TNRC6B (1.6)	HK3 (1.4)	SLC25A15 (1.0)	SLC38A1 (1.0)	CD44 (1.0)	WNT4 (0.9)	LRRC34 (0.9)
ENSG00000076928	ARHGEF1 PPI subnetwork	0.06	0.900598	RIC8A (2.4)	MYNN (1.6)	CD44 (1.4)	KANK1 (1.4)	FOXO1 (1.3)	OBFC1 (1.2)	COG6 (1.1)	UIMC1 (1.1)	BET1L (1.0)	TERT (1.0)
MP:0004841	abnormal small intestine crypts of Lieberkuhn morphology	0.06	0.900598	HK3 (3.9)	SULT1B1 (2.6)	ENSG00000228397 (2.4)	WT1-AS (2.4)	WNT4 (2.3)	LNX1 (1.9)	LINC00339 (1.8)	CD44 (1.3)	ODF3 (1.3)	KANK1 (1.3)
GO:0042771	DNA damage response, signal transduction by p53 class mediator resulting in induction of apoptosis	0.06	0.900598	TNRC6B (2.8)	NPAT (1.7)	LRRC34 (1.5)	DMRT1 (1.4)	ATM (1.4)	CDC42-IT1 (1.2)	KDELC2 (1.0)	SH3PXD2A (0.9)	ZNF346 (0.9)	C11orf65 (0.7)
ENSG00000115947	ORC4 PPI subnetwork	0.06	0.900598	NPAT (3.6)	KDELC2 (1.8)	OBFC1 (1.6)	TNRC6B (1.4)	FIP1L1 (1.3)	ENSG00000228397 (0.9)	ACAT1 (0.9)	MRPS31 (0.8)	LINC00339 (0.8)	ATM (0.8)
GO:0072378	blood coagulation, fibrin clot formation	0.06	0.900598	SCGB1C1 (4.6)	C11orf65 (2.0)	SIRT3 (1.7)	ODF3 (1.6)	SLC25A15 (1.2)	ENSG00000258096 (1.2)	ENSG00000226403 (1.2)	SYNE1 (1.0)	COG6 (1.0)	LRRC34 (1.0)
ENSG00000118007	STAG1 PPI subnetwork	0.06	0.900598	NPAT (3.0)	ATM (2.5)	FIP1L1 (2.2)	SLC38A1 (2.1)	ENSG00000228397 (1.9)	TERT (1.9)	SYNE1 (1.5)	SALL1 (1.2)	CUL5 (1.1)	RIC8A (1.0)
MP:0000596	abnormal liver development	0.06	0.900598	WT1-AS (4.8)	SLC38A2 (2.5)	TNRC6B (2.2)	FIP1L1 (1.8)	SLC38A1 (1.7)	UIMC1 (1.6)	SYNE1 (1.5)	SALL1 (1.5)	CDC42-IT1 (1.4)	KANK1 (1.3)
KEGG_LYSINE_DEGRADATION	KEGG_LYSINE_DEGRADATION	0.06	0.900598	ACAT1 (3.3)	KANK1 (2.1)	SLC25A15 (2.1)	ATM (1.6)	FOXO1 (1.6)	SIRT3 (1.5)	TERT (1.2)	UIMC1 (1.2)	COG6 (1.2)	EXPH5 (1.2)
ENSG00000116478	HDAC1 PPI subnetwork	0.06	0.900598	TNRC6B (3.3)	SLC38A2 (2.6)	NPAT (2.4)	FIP1L1 (2.2)	UIMC1 (1.7)	ZNF346 (1.5)	TERT (1.1)	FOXO1 (1.1)	SLC38A1 (1.0)	CDC42-IT1 (1.0)
GO:0000723	telomere maintenance	0.06	0.900598	OBFC1 (3.5)	TERT (3.4)	NPAT (3.3)	ATM (3.3)	ENSG00000228397 (3.0)	KDELC2 (2.1)	UIMC1 (1.3)	MRPS31 (1.3)	LINC00339 (1.2)	ZNF346 (1.2)
MP:0000693	spleen hyperplasia	0.06	0.900598	FOXO1 (2.6)	CD44 (1.9)	SLC38A1 (1.8)	UIMC1 (1.5)	NPAT (1.5)	ENSG00000258096 (1.4)	LRRC34 (1.4)	TERT (1.2)	WT1-AS (1.1)	KDELC2 (1.0)
GO:0048634	regulation of muscle organ development	0.06	0.900598	KANK1 (2.0)	GREB1 (1.6)	LINC00339 (1.4)	SCGB1C1 (1.4)	ZNF346 (1.4)	FOXO1 (1.3)	SLC38A2 (1.2)	WNT4 (1.1)	C11orf65 (1.0)	TNRC6B (1.0)
MP:0005093	decreased B cell proliferation	0.06	0.900598	FOXO1 (3.3)	CD44 (2.5)	TERT (1.7)	MYNN (1.4)	LRRC34 (1.4)	BET1L (1.0)	SLC38A1 (1.0)	CDC42 (0.9)	ATM (0.9)	RIC8A (0.8)
GO:0031091	platelet alpha granule	0.06	0.900598	SCGB1C1 (7.6)	CD44 (1.8)	C11orf65 (1.3)	SYNE1 (1.1)	COG6 (1.0)	ENSG00000228397 (0.9)	SLC25A15 (0.9)	FOXO1 (0.8)	SIRT3 (0.6)	GREB1 (0.6)
ENSG00000167815	PRDX2 PPI subnetwork	0.06	0.900598	PSMD13 (2.2)	CDC42 (2.1)	OBFC1 (1.9)	LNX1 (1.9)	ENSG00000184378 (1.6)	MRPS31 (1.5)	DMRT1 (1.4)	ACAT1 (1.4)	KDELC2 (1.4)	ENSG00000226403 (1.2)
GO:0010165	response to X-ray	0.06	0.900598	OBFC1 (2.2)	ATM (2.2)	C11orf65 (2.0)	ZNF346 (1.8)	KDELC2 (1.7)	NPAT (1.5)	MYNN (1.4)	MRPS31 (1.4)	LINC00339 (1.4)	ENSG00000258096 (1.1)
GO:0005109	frizzled binding	0.06	0.900598	WNT4 (3.8)	WT1-AS (2.4)	SALL1 (2.3)	GREB1 (2.2)	SH3PXD2A (2.0)	C11orf65 (1.8)	DMRT1 (1.8)	EXPH5 (1.2)	COG6 (1.0)	ENSG00000184378 (1.0)
ENSG00000196747	HIST1H2AI PPI subnetwork	0.06	0.900598	SCGB1C1 (3.7)	CUL5 (3.3)	FIP1L1 (2.0)	DMRT1 (1.8)	SLC38A1 (1.7)	KDELC2 (1.7)	ATM (1.5)	PSMD13 (1.2)	OBFC1 (1.1)	C11orf65 (1.1)
ENSG00000196787	HIST1H2AG PPI subnetwork	0.06	0.900598	SCGB1C1 (3.7)	CUL5 (3.3)	FIP1L1 (2.0)	DMRT1 (1.8)	SLC38A1 (1.7)	KDELC2 (1.7)	ATM (1.5)	PSMD13 (1.2)	OBFC1 (1.1)	C11orf65 (1.1)
ENSG00000196866	HIST1H2AD PPI subnetwork	0.06	0.900598	SCGB1C1 (3.7)	CUL5 (3.3)	FIP1L1 (2.0)	DMRT1 (1.8)	SLC38A1 (1.7)	KDELC2 (1.7)	ATM (1.5)	PSMD13 (1.2)	OBFC1 (1.1)	C11orf65 (1.1)
ENSG00000184348	HIST1H2AK PPI subnetwork	0.06	0.900598	SCGB1C1 (3.7)	CUL5 (3.3)	FIP1L1 (2.0)	DMRT1 (1.8)	SLC38A1 (1.7)	KDELC2 (1.7)	ATM (1.5)	PSMD13 (1.2)	OBFC1 (1.1)	C11orf65 (1.1)
ENSG00000198374	HIST1H2AL PPI subnetwork	0.06	0.900598	SCGB1C1 (3.7)	CUL5 (3.3)	FIP1L1 (2.0)	DMRT1 (1.8)	SLC38A1 (1.7)	KDELC2 (1.7)	ATM (1.5)	PSMD13 (1.2)	OBFC1 (1.1)	C11orf65 (1.1)
ENSG00000171560	FGA PPI subnetwork	0.06	0.900598	GREB1 (1.9)	WNT4 (1.7)	TNRC6B (1.2)	SLC25A15 (1.1)	SCGB1C1 (1.1)	HK3 (1.0)	ENSG00000184378 (0.9)	SALL1 (0.8)	SYNE1 (0.8)	DMRT1 (0.8)
GO:0035097	histone methyltransferase complex	0.06	0.900598	UIMC1 (2.4)	NPAT (2.3)	TNRC6B (2.0)	DMRT1 (1.9)	ATM (1.5)	LRRC34 (1.4)	CDC42 (1.3)	FOXO1 (1.1)	MRPS31 (1.1)	SLC38A2 (1.1)
GO:0034708	methyltransferase complex	0.06	0.900598	UIMC1 (2.4)	NPAT (2.3)	TNRC6B (2.0)	DMRT1 (1.9)	ATM (1.5)	LRRC34 (1.4)	CDC42 (1.3)	FOXO1 (1.1)	MRPS31 (1.1)	SLC38A2 (1.1)
GO:0030663	COPI coated vesicle membrane	0.06	0.900598	BET1L (5.3)	COG6 (5.2)	ACAT1 (2.2)	ATM (2.0)	RIC8A (1.8)	LINC00339 (1.7)	MYNN (1.6)	CUL5 (1.5)	KDELC2 (1.5)	SLC25A15 (1.4)
ENSG00000174177	CTU2 PPI subnetwork	0.06	0.900598	SLC38A2 (1.9)	SLC25A15 (1.8)	CDC42 (1.8)	CDC42-IT1 (1.6)	EXPH5 (1.6)	WT1-AS (1.3)	ENSG00000184378 (1.3)	ZNF346 (1.2)	SYNE1 (1.1)	ENSG00000228397 (0.9)
ENSG00000072135	PTPN18 PPI subnetwork	0.06	0.900598	EXPH5 (2.6)	COG6 (2.6)	SLC38A2 (2.2)	CUL5 (2.0)	TNRC6B (2.0)	ATM (1.7)	NPAT (1.7)	ODF3 (1.7)	HK3 (1.7)	SYNE1 (1.6)
ENSG00000153774	CFDP1 PPI subnetwork	0.06	0.900598	UIMC1 (2.1)	FIP1L1 (2.0)	MRPS31 (1.8)	CDC42 (1.3)	LINC00339 (1.3)	PSMD13 (1.0)	COG6 (1.0)	MYNN (0.9)	WT1-AS (0.9)	TERT (0.8)
ENSG00000114062	UBE3A PPI subnetwork	0.06	0.900598	GREB1 (4.4)	TERT (3.3)	ZNF346 (2.2)	UIMC1 (2.2)	SLC38A1 (1.8)	SALL1 (1.7)	WNT4 (1.3)	CUL5 (1.2)	PSMD13 (1.2)	MYNN (1.0)
ENSG00000106682	EIF4H PPI subnetwork	0.06	0.900598	MYNN (2.5)	ATM (1.9)	UIMC1 (1.4)	NPAT (1.4)	KANK1 (1.3)	ENSG00000226403 (1.2)	LINC00339 (1.2)	LRRC31 (1.1)	WT1-AS (1.1)	ENSG00000184378 (1.0)
MP:0006042	increased apoptosis	0.06	0.900598	FIP1L1 (2.8)	SLC38A2 (2.7)	TERT (2.3)	MRPS31 (1.8)	ATM (1.4)	SALL1 (1.3)	CUL5 (1.2)	NPAT (1.0)	GREB1 (0.9)	UIMC1 (0.8)
GO:0007530	sex determination	0.06	0.900598	WT1-AS (6.6)	DMRT1 (3.5)	GREB1 (2.9)	ENSG00000228397 (1.7)	WNT4 (1.5)	C11orf65 (1.3)	ZNF346 (1.0)	SLC38A1 (1.0)	CDC42-IT1 (0.9)	SLC38A2 (0.8)
ENSG00000076944	STXBP2 PPI subnetwork	0.06	0.900598	ACAT1 (2.0)	SIRT3 (2.0)	RIC8A (2.0)	PSMD13 (2.0)	CDC42 (1.7)	CDC42-IT1 (1.7)	TERT (1.6)	OBFC1 (1.4)	COG6 (1.4)	SCGB1C1 (1.1)
MP:0003567	abnormal fetal cardiomyocyte proliferation	0.06	0.900598	WT1-AS (3.5)	KANK1 (2.6)	ENSG00000228397 (2.5)	SLC38A1 (2.5)	LNX1 (2.1)	DMRT1 (1.8)	SALL1 (1.6)	LRRC31 (1.3)	SLC38A2 (1.3)	WNT4 (1.1)
GO:0008156	negative regulation of DNA replication	0.06	0.900598	ATM (3.6)	NPAT (3.2)	TERT (3.0)	CUL5 (2.4)	FIP1L1 (2.0)	UIMC1 (2.0)	KDELC2 (1.6)	OBFC1 (1.5)	MYNN (1.4)	MRPS31 (1.2)
GO:0016614	oxidoreductase activity, acting on CH-OH group of donors	0.06	0.900598	ACAT1 (4.4)	SULT1B1 (2.4)	LRRC31 (1.9)	SLC25A15 (1.6)	LNX1 (1.2)	EXPH5 (1.1)	MRPS31 (1.1)	OBFC1 (1.0)	SIRT3 (0.9)	CDC42-IT1 (0.9)
MP:0004617	sacral vertebral transformation	0.06	0.900598	SALL1 (7.5)	WT1-AS (4.0)	KANK1 (2.5)	TNRC6B (2.4)	GREB1 (2.2)	ENSG00000226403 (2.1)	FOXO1 (1.5)	SLC38A1 (1.3)	CUL5 (1.2)	WNT4 (1.0)
GO:0016570	histone modification	0.06	0.900598	UIMC1 (2.4)	TNRC6B (2.2)	TERT (2.2)	FIP1L1 (1.7)	NPAT (1.6)	ZNF346 (1.4)	MYNN (1.4)	SLC38A2 (1.2)	COG6 (1.1)	ATM (0.9)
MP:0002463	abnormal neutrophil physiology	0.06	0.900598	HK3 (7.8)	CD44 (2.1)	SYNE1 (1.4)	SULT1B1 (1.2)	TNRC6B (0.8)	ENSG00000226403 (0.7)	LRRC34 (0.7)	UIMC1 (0.6)	ODF3 (0.5)	WT1-AS (0.4)
ENSG00000135547	HEY2 PPI subnetwork	0.06	0.900598	GREB1 (2.3)	ENSG00000258096 (1.9)	ENSG00000228397 (1.6)	BET1L (1.6)	NPAT (1.3)	WNT4 (1.1)	SIRT3 (1.0)	UIMC1 (1.0)	SLC25A15 (0.9)	SALL1 (0.9)
ENSG00000156313	RPGR PPI subnetwork	0.06	0.900598	OBFC1 (4.2)	ENSG00000258096 (1.8)	SCGB1C1 (1.6)	SIRT3 (1.4)	SH3PXD2A (1.4)	DMRT1 (1.3)	TERT (1.3)	CDC42 (1.3)	RIC8A (1.1)	C11orf65 (1.1)
GO:0006304	DNA modification	0.06	0.900598	C11orf65 (4.2)	ENSG00000226403 (3.0)	TERT (2.8)	OBFC1 (1.9)	DMRT1 (1.9)	TNRC6B (1.6)	LRRC34 (1.4)	UIMC1 (1.4)	NPAT (1.1)	ZNF346 (1.1)
MP:0005464	abnormal platelet physiology	0.06	0.900598	SCGB1C1 (5.0)	SULT1B1 (2.4)	COG6 (1.8)	WT1-AS (1.6)	SYNE1 (1.6)	ENSG00000184378 (1.1)	ODF3 (1.1)	HK3 (1.0)	ENSG00000258096 (1.0)	CUL5 (0.7)
ENSG00000123374	CDK2 PPI subnetwork	0.06	0.900598	NPAT (2.5)	ZNF346 (1.7)	OBFC1 (1.3)	UIMC1 (1.3)	ATM (1.0)	SLC38A2 (0.9)	LRRC34 (0.8)	KDELC2 (0.8)	PSMD13 (0.8)	TERT (0.7)
MP:0005017	decreased B cell number	0.06	0.900598	FOXO1 (3.0)	TNRC6B (2.0)	SLC38A1 (2.0)	CD44 (1.9)	TERT (1.8)	ATM (1.4)	LRRC34 (1.3)	SYNE1 (1.2)	HK3 (1.0)	MYNN (1.0)
ENSG00000112033	PPARD PPI subnetwork	0.06	0.900598	FOXO1 (2.9)	TNRC6B (2.4)	DMRT1 (1.9)	SLC38A1 (1.6)	SYNE1 (1.4)	ZNF346 (1.2)	TERT (1.2)	SLC38A2 (1.1)	SH3PXD2A (0.9)	WNT4 (0.9)
GO:0005669	transcription factor TFIID complex	0.06	0.900598	UIMC1 (2.4)	NPAT (2.2)	MRPS31 (2.2)	COG6 (1.9)	DMRT1 (1.9)	SLC25A15 (1.9)	CDC42-IT1 (1.7)	ZNF346 (1.5)	MYNN (1.4)	LRRC34 (1.2)
GO:0051213	dioxygenase activity	0.06	0.900598	SULT1B1 (2.0)	SIRT3 (1.8)	LRRC34 (1.7)	KDELC2 (1.5)	ODF3 (1.3)	SALL1 (1.3)	CUL5 (1.2)	ENSG00000226403 (1.1)	CDC42-IT1 (1.0)	SYNE1 (1.0)
GO:0071565	nBAF complex	0.06	0.900598	TNRC6B (3.1)	FIP1L1 (2.1)	ENSG00000226403 (1.5)	DMRT1 (1.4)	ENSG00000228397 (1.3)	CDC42-IT1 (1.0)	GREB1 (1.0)	WNT4 (0.9)	COG6 (0.9)	SULT1B1 (0.9)
KEGG_ARGININE_AND_PROLINE_METABOLISM	KEGG_ARGININE_AND_PROLINE_METABOLISM	0.06	0.900598	SLC25A15 (3.5)	ACAT1 (2.6)	SIRT3 (1.4)	KANK1 (1.3)	ENSG00000226403 (1.3)	SALL1 (1.2)	SULT1B1 (1.1)	FOXO1 (1.1)	SYNE1 (0.8)	OBFC1 (0.7)
GO:0055093	response to hyperoxia	0.06	0.900598	LNX1 (3.5)	OBFC1 (2.5)	C11orf65 (1.8)	SYNE1 (1.7)	ENSG00000258096 (1.6)	FIP1L1 (1.5)	ENSG00000184378 (1.2)	CD44 (1.1)	ENSG00000228397 (1.1)	HK3 (1.1)
MP:0003645	increased pancreatic beta cell number	0.06	0.900598	GREB1 (4.6)	FOXO1 (2.9)	WNT4 (2.6)	WT1-AS (1.9)	DMRT1 (1.7)	RIC8A (1.5)	BET1L (1.4)	SLC38A2 (1.4)	C11orf65 (1.4)	ATM (1.3)
ENSG00000164733	CTSB PPI subnetwork	0.06	0.900598	HK3 (2.7)	LRRC31 (2.2)	CDC42 (2.0)	KDELC2 (1.9)	PSMD13 (1.7)	CD44 (1.7)	ZNF346 (1.6)	SH3PXD2A (1.5)	RIC8A (1.4)	KANK1 (1.3)
MP:0001596	hypotension	0.06	0.900598	SYNE1 (2.9)	SLC25A15 (2.1)	KANK1 (1.8)	ODF3 (1.8)	FOXO1 (1.3)	LINC00339 (1.2)	ENSG00000258096 (1.2)	CDC42-IT1 (1.2)	SULT1B1 (1.1)	TERT (1.0)
GO:0045638	negative regulation of myeloid cell differentiation	0.06	0.900598	ENSG00000228397 (2.3)	CDC42-IT1 (2.0)	TNRC6B (1.9)	SH3PXD2A (1.5)	DMRT1 (1.4)	CUL5 (1.1)	SCGB1C1 (1.0)	FOXO1 (0.8)	HK3 (0.8)	GREB1 (0.7)
ENSG00000005175	RPAP3 PPI subnetwork	0.06	0.900598	FOXO1 (2.8)	TNRC6B (2.4)	LINC00339 (1.6)	ENSG00000184378 (1.5)	CUL5 (1.1)	PSMD13 (1.1)	MRPS31 (1.0)	FIP1L1 (1.0)	SLC38A2 (1.0)	OBFC1 (0.9)
ENSG00000134215	VAV3 PPI subnetwork	0.06	0.900598	RIC8A (1.8)	TERT (1.5)	GREB1 (1.4)	SLC38A2 (1.3)	CDC42 (1.2)	FOXO1 (1.2)	BET1L (1.0)	OBFC1 (0.9)	EXPH5 (0.9)	SULT1B1 (0.8)
ENSG00000157766	ACAN PPI subnetwork	0.06	0.900598	LNX1 (2.4)	ENSG00000226403 (1.8)	SH3PXD2A (1.7)	ODF3 (1.3)	HK3 (1.2)	KDELC2 (1.0)	SYNE1 (1.0)	KANK1 (0.9)	ATM (0.8)	C11orf65 (0.7)
ENSG00000103994	ZFP106 PPI subnetwork	0.07	0.900598	TNRC6B (3.4)	ENSG00000184378 (1.9)	ZNF346 (1.6)	FOXO1 (1.3)	SLC38A2 (1.1)	TERT (1.1)	BET1L (1.0)	ENSG00000228397 (0.9)	WT1-AS (0.8)	SH3PXD2A (0.8)
ENSG00000163283	ALPP PPI subnetwork	0.07	0.900598	TNRC6B (3.7)	ENSG00000184378 (1.8)	ZNF346 (1.5)	ENSG00000228397 (1.1)	BET1L (1.1)	SLC38A2 (1.1)	CDC42-IT1 (0.9)	TERT (0.9)	ATM (0.8)	GREB1 (0.7)
GO:0009086	methionine biosynthetic process	0.07	0.900598	ENSG00000184378 (1.8)	ENSG00000226403 (1.7)	ZNF346 (1.7)	CUL5 (1.6)	KDELC2 (1.6)	FIP1L1 (1.5)	OBFC1 (1.4)	LNX1 (1.2)	SCGB1C1 (1.1)	COG6 (1.0)
ENSG00000198265	HELZ PPI subnetwork	0.07	0.900598	TNRC6B (3.8)	ZNF346 (1.5)	ENSG00000184378 (1.4)	DMRT1 (1.4)	SCGB1C1 (1.4)	BET1L (1.3)	ATM (1.2)	OBFC1 (0.9)	CDC42-IT1 (0.9)	ENSG00000228397 (0.9)
ENSG00000089154	GCN1L1 PPI subnetwork	0.07	0.900598	FIP1L1 (3.3)	PSMD13 (2.1)	MRPS31 (2.0)	ATM (1.6)	CUL5 (1.5)	UIMC1 (1.5)	NPAT (1.4)	RIC8A (1.4)	SLC38A1 (1.3)	MYNN (1.3)
GO:0055007	cardiac muscle cell differentiation	0.07	0.900598	WT1-AS (4.0)	ENSG00000226403 (1.8)	SYNE1 (1.7)	TNRC6B (1.2)	KANK1 (1.2)	GREB1 (1.2)	SIRT3 (1.1)	DMRT1 (1.1)	ENSG00000258096 (1.0)	ENSG00000184378 (1.0)
MP:0003606	kidney failure	0.07	0.900598	WT1-AS (5.5)	SALL1 (2.7)	ENSG00000226403 (2.0)	DMRT1 (1.8)	ZNF346 (1.5)	SLC25A15 (1.4)	ENSG00000228397 (1.3)	RIC8A (1.3)	FOXO1 (1.2)	ATM (1.2)
ENSG00000119630	PGF PPI subnetwork	0.07	0.900598	HK3 (3.3)	MYNN (1.9)	SLC38A2 (1.9)	GREB1 (1.9)	SULT1B1 (1.6)	SH3PXD2A (1.4)	LNX1 (1.4)	SYNE1 (1.3)	ENSG00000228397 (1.2)	LRRC31 (1.1)
MP:0001259	abnormal body weight	0.07	0.900598	SULT1B1 (2.5)	LNX1 (2.4)	SYNE1 (1.9)	SLC25A15 (1.6)	GREB1 (1.4)	WT1-AS (1.3)	SLC38A2 (1.1)	WNT4 (1.0)	LRRC31 (1.0)	FOXO1 (0.9)
ENSG00000175387	SMAD2 PPI subnetwork	0.07	0.900598	FOXO1 (2.8)	TNRC6B (2.5)	KANK1 (1.9)	NPAT (1.6)	SALL1 (1.5)	UIMC1 (1.2)	ENSG00000184378 (1.0)	CDC42 (1.0)	RIC8A (0.8)	MRPS31 (0.8)
ENSG00000154767	XPC PPI subnetwork	0.07	0.900598	PSMD13 (3.2)	OBFC1 (3.0)	RIC8A (2.8)	MRPS31 (2.7)	ZNF346 (2.3)	UIMC1 (2.1)	FIP1L1 (1.8)	SIRT3 (1.6)	BET1L (1.6)	KDELC2 (1.5)
GO:0016569	covalent chromatin modification	0.07	0.900598	UIMC1 (2.4)	TERT (2.3)	TNRC6B (2.2)	FIP1L1 (1.7)	NPAT (1.7)	ZNF346 (1.4)	MYNN (1.3)	SLC38A2 (1.1)	COG6 (1.0)	ATM (0.9)
GO:0070482	response to oxygen levels	0.07	0.900598	SLC38A1 (1.5)	LNX1 (1.4)	FOXO1 (1.3)	ENSG00000184378 (1.1)	GREB1 (1.0)	CD44 (0.9)	DMRT1 (0.9)	C11orf65 (0.9)	WNT4 (0.9)	SCGB1C1 (0.8)
ENSG00000117748	RPA2 PPI subnetwork	0.07	0.900598	NPAT (4.9)	OBFC1 (2.5)	MRPS31 (2.2)	ATM (2.1)	LINC00339 (1.6)	MYNN (1.5)	LRRC31 (1.5)	RIC8A (1.4)	FIP1L1 (1.3)	ENSG00000258096 (1.2)
ENSG00000151164	RAD9B PPI subnetwork	0.07	0.900598	NPAT (3.6)	MRPS31 (3.4)	UIMC1 (2.4)	OBFC1 (2.1)	MYNN (1.8)	ATM (1.7)	COG6 (1.7)	LINC00339 (1.4)	TERT (1.4)	ENSG00000258096 (1.0)
GO:0016701	oxidoreductase activity, acting on single donors with incorporation of molecular oxygen	0.07	0.900598	SULT1B1 (2.0)	LRRC34 (1.7)	SIRT3 (1.5)	ODF3 (1.3)	CDC42-IT1 (1.1)	ENSG00000226403 (1.1)	SH3PXD2A (1.1)	KDELC2 (1.1)	SALL1 (1.1)	FOXO1 (1.1)
GO:0000187	activation of MAPK activity	0.07	0.900598	LRRC31 (2.2)	CD44 (1.8)	OBFC1 (1.5)	TERT (1.4)	ENSG00000258096 (1.3)	BET1L (1.3)	SLC38A2 (1.2)	KANK1 (1.1)	SIRT3 (0.8)	SULT1B1 (0.8)
ENSG00000179950	PUF60 PPI subnetwork	0.07	0.900598	LINC00339 (2.0)	UIMC1 (1.7)	CUL5 (1.7)	FIP1L1 (1.6)	CDC42 (1.6)	KDELC2 (1.5)	SYNE1 (1.3)	PSMD13 (1.2)	ACAT1 (1.0)	SULT1B1 (1.0)
ENSG00000206088	ENSG00000206088 PPI subnetwork	0.07	0.900598	LNX1 (2.4)	FIP1L1 (2.4)	TNRC6B (2.3)	TERT (1.7)	DMRT1 (1.7)	SLC38A2 (1.7)	WT1-AS (1.6)	NPAT (1.4)	WNT4 (1.2)	ENSG00000228397 (1.1)
ENSG00000124813	RUNX2 PPI subnetwork	0.07	0.900598	TNRC6B (2.8)	SALL1 (2.4)	FOXO1 (2.3)	TERT (1.8)	COG6 (1.3)	SLC25A15 (1.2)	UIMC1 (1.1)	LINC00339 (1.0)	WT1-AS (0.8)	CDC42-IT1 (0.7)
ENSG00000142515	KLK3 PPI subnetwork	0.07	0.900598	SALL1 (2.3)	TERT (2.2)	HK3 (1.7)	COG6 (1.1)	SYNE1 (1.0)	TNRC6B (0.9)	NPAT (0.9)	GREB1 (0.8)	SLC38A2 (0.7)	FOXO1 (0.7)
REACTOME_MITOTIC_G2:G2M_PHASES	REACTOME_MITOTIC_G2:G2M_PHASES	0.07	0.900598	OBFC1 (2.3)	ZNF346 (1.7)	NPAT (1.7)	UIMC1 (1.7)	ATM (1.7)	LRRC34 (1.4)	TERT (1.4)	SIRT3 (1.3)	ENSG00000226403 (1.3)	CDC42-IT1 (1.1)
ENSG00000173598	NUDT4 PPI subnetwork	0.07	0.900598	SLC38A1 (2.1)	LRRC34 (1.6)	CDC42-IT1 (1.4)	LINC00339 (1.3)	CDC42 (1.3)	PSMD13 (1.3)	SALL1 (1.1)	LRRC31 (1.1)	SH3PXD2A (0.9)	SULT1B1 (0.9)
MP:0005181	decreased circulating estradiol level	0.07	0.900598	GREB1 (6.2)	FOXO1 (3.1)	KANK1 (2.6)	WT1-AS (2.0)	TERT (2.0)	LINC00339 (1.2)	DMRT1 (1.2)	MYNN (1.0)	EXPH5 (1.0)	LNX1 (0.9)
ENSG00000135930	EIF4E2 PPI subnetwork	0.07	0.900598	TNRC6B (1.9)	FOXO1 (1.8)	SLC38A1 (1.5)	DMRT1 (1.3)	KANK1 (1.3)	ENSG00000258096 (1.2)	OBFC1 (1.2)	WNT4 (1.1)	UIMC1 (0.9)	WT1-AS (0.8)
ENSG00000134242	PTPN22 PPI subnetwork	0.07	0.900598	HK3 (3.4)	LRRC34 (3.1)	WT1-AS (1.8)	KANK1 (1.7)	SLC38A1 (1.7)	ENSG00000226403 (1.2)	ENSG00000258096 (1.0)	ATM (1.0)	COG6 (0.9)	TERT (0.8)
MP:0005185	decreased circulating progesterone level	0.07	0.900598	GREB1 (4.2)	FOXO1 (2.5)	LRRC31 (2.2)	WT1-AS (1.9)	SYNE1 (1.8)	SH3PXD2A (1.4)	TERT (1.3)	KANK1 (1.1)	SLC25A15 (0.6)	SULT1B1 (0.6)
ENSG00000114745	GORASP1 PPI subnetwork	0.07	0.900598	COG6 (3.8)	BET1L (2.6)	KDELC2 (2.1)	LNX1 (1.9)	OBFC1 (1.6)	FIP1L1 (1.5)	KANK1 (1.3)	ACAT1 (1.3)	SH3PXD2A (1.1)	SLC25A15 (1.0)
KEGG_RNA_DEGRADATION	KEGG_RNA_DEGRADATION	0.07	0.900598	MRPS31 (3.4)	UIMC1 (3.3)	MYNN (2.5)	NPAT (2.4)	ATM (2.0)	FIP1L1 (1.9)	CUL5 (1.7)	C11orf65 (1.6)	CDC42-IT1 (1.5)	DMRT1 (1.3)
GO:0007369	gastrulation	0.07	0.900598	KANK1 (2.4)	SALL1 (2.1)	GREB1 (1.8)	ENSG00000184378 (1.7)	TERT (1.6)	EXPH5 (1.5)	SH3PXD2A (1.2)	KDELC2 (1.1)	SCGB1C1 (1.1)	WT1-AS (1.0)
REACTOME_COPI_MEDIATED_TRANSPORT	REACTOME_COPI_MEDIATED_TRANSPORT	0.07	0.900598	BET1L (6.0)	COG6 (5.6)	ATM (2.5)	ACAT1 (2.3)	ENSG00000258096 (2.0)	RIC8A (1.9)	PSMD13 (1.6)	CUL5 (1.6)	MYNN (1.2)	LRRC31 (1.2)
REACTOME_GOLGI_TO_ER_RETROGRADE_TRANSPORT	REACTOME_GOLGI_TO_ER_RETROGRADE_TRANSPORT	0.07	0.900598	BET1L (6.0)	COG6 (5.6)	ATM (2.5)	ACAT1 (2.3)	ENSG00000258096 (2.0)	RIC8A (1.9)	PSMD13 (1.6)	CUL5 (1.6)	MYNN (1.2)	LRRC31 (1.2)
GO:0040001	establishment of mitotic spindle localization	0.07	0.900598	CUL5 (2.5)	ODF3 (2.3)	NPAT (1.8)	COG6 (1.6)	EXPH5 (1.5)	ATM (1.4)	ZNF346 (1.2)	FIP1L1 (1.2)	SULT1B1 (1.1)	MRPS31 (1.0)
KEGG_ASCORBATE_AND_ALDARATE_METABOLISM	KEGG_ASCORBATE_AND_ALDARATE_METABOLISM	0.07	0.900598	SULT1B1 (4.9)	LRRC31 (4.0)	ACAT1 (2.3)	EXPH5 (2.1)	KANK1 (1.8)	ODF3 (1.7)	SCGB1C1 (1.4)	KDELC2 (1.3)	COG6 (1.2)	LNX1 (1.2)
ENSG00000009413	REV3L PPI subnetwork	0.07	0.900598	LINC00339 (4.1)	OBFC1 (3.8)	ZNF346 (2.4)	NPAT (1.9)	UIMC1 (1.9)	MRPS31 (1.5)	MYNN (1.2)	ENSG00000258096 (1.1)	TNRC6B (1.0)	LRRC31 (1.0)
ENSG00000124181	PLCG1 PPI subnetwork	0.07	0.900598	KANK1 (2.2)	SLC38A1 (2.1)	HK3 (1.8)	CD44 (1.4)	TERT (1.3)	LRRC31 (1.2)	ODF3 (1.1)	C11orf65 (1.0)	SLC25A15 (1.0)	SYNE1 (1.0)
MP:0003014	abnormal kidney medulla morphology	0.07	0.900598	WT1-AS (3.6)	WNT4 (2.6)	SALL1 (1.6)	ENSG00000258096 (1.5)	KANK1 (1.5)	C11orf65 (1.1)	LRRC31 (1.1)	KDELC2 (1.1)	ZNF346 (1.0)	ENSG00000226403 (0.9)
MP:0003179	decreased platelet cell number	0.07	0.900598	SCGB1C1 (3.8)	HK3 (2.1)	TNRC6B (1.7)	NPAT (1.6)	UIMC1 (1.6)	CD44 (1.0)	C11orf65 (0.9)	LRRC34 (0.9)	TERT (0.9)	SLC25A15 (0.7)
REACTOME_SIGNALING_BY_NODAL	REACTOME_SIGNALING_BY_NODAL	0.07	0.900598	FOXO1 (3.0)	TERT (2.4)	KANK1 (2.4)	ENSG00000184378 (2.0)	SALL1 (2.0)	MYNN (1.1)	TNRC6B (1.0)	BET1L (0.9)	SLC38A2 (0.8)	GREB1 (0.7)
ENSG00000167513	CDT1 PPI subnetwork	0.07	0.900598	NPAT (3.7)	KDELC2 (2.1)	SLC38A2 (1.3)	ENSG00000184378 (1.2)	ENSG00000258096 (1.1)	OBFC1 (1.0)	MRPS31 (1.0)	LRRC34 (0.8)	MYNN (0.7)	UIMC1 (0.7)
ENSG00000111481	COPZ1 PPI subnetwork	0.07	0.900598	BET1L (5.6)	COG6 (5.5)	ACAT1 (3.2)	ENSG00000258096 (2.1)	RIC8A (2.0)	MYNN (1.9)	ATM (1.8)	LINC00339 (1.8)	CUL5 (1.7)	SIRT3 (1.5)
ENSG00000128829	EIF2AK4 PPI subnetwork	0.07	0.900598	RIC8A (2.4)	ATM (2.2)	PSMD13 (2.0)	KANK1 (1.6)	FIP1L1 (1.5)	SLC38A1 (1.3)	TERT (1.3)	FOXO1 (1.2)	SALL1 (1.2)	OBFC1 (1.1)
ENSG00000166949	SMAD3 PPI subnetwork	0.07	0.900598	FOXO1 (3.0)	TNRC6B (2.7)	SALL1 (1.9)	CDC42-IT1 (1.5)	UIMC1 (1.3)	SLC38A2 (1.2)	EXPH5 (1.1)	MRPS31 (1.1)	SULT1B1 (1.0)	CDC42 (0.9)
GO:0071158	positive regulation of cell cycle arrest	0.07	0.900598	PSMD13 (3.2)	ENSG00000228397 (2.3)	CDC42 (1.8)	MYNN (1.5)	CDC42-IT1 (1.4)	MRPS31 (1.4)	LINC00339 (1.3)	BET1L (1.3)	ENSG00000258096 (1.1)	RIC8A (1.1)
GO:0004521	endoribonuclease activity	0.07	0.900598	MRPS31 (2.5)	OBFC1 (2.4)	SH3PXD2A (1.8)	ENSG00000226403 (1.8)	EXPH5 (1.5)	ZNF346 (1.4)	CD44 (1.3)	SLC38A1 (1.1)	ATM (1.0)	GREB1 (0.8)
GO:0000956	nuclear-transcribed mRNA catabolic process	0.07	0.900598	MYNN (3.6)	ENSG00000228397 (3.2)	UIMC1 (3.0)	CDC42-IT1 (2.9)	MRPS31 (2.0)	LINC00339 (1.8)	CUL5 (1.8)	FIP1L1 (1.7)	NPAT (1.7)	ZNF346 (1.1)
GO:0016568	chromatin modification	0.07	0.900598	TNRC6B (3.2)	UIMC1 (2.6)	TERT (2.2)	FIP1L1 (2.2)	NPAT (2.0)	ZNF346 (1.6)	ATM (1.4)	SLC38A2 (1.1)	DMRT1 (1.1)	CUL5 (1.0)
GO:0006775	fat-soluble vitamin metabolic process	0.07	0.900598	EXPH5 (2.3)	ENSG00000184378 (2.0)	LINC00339 (2.0)	ODF3 (1.7)	LRRC34 (1.6)	TERT (1.6)	WNT4 (1.3)	ENSG00000228397 (1.3)	SULT1B1 (1.3)	KDELC2 (1.1)
ENSG00000168556	ING2 PPI subnetwork	0.07	0.900598	UIMC1 (2.8)	CDC42-IT1 (2.0)	SLC25A15 (2.0)	ENSG00000226403 (1.7)	MYNN (1.7)	FOXO1 (1.4)	BET1L (1.3)	RIC8A (1.2)	DMRT1 (1.1)	NPAT (1.1)
ENSG00000133997	MED6 PPI subnetwork	0.07	0.900598	BET1L (2.7)	RIC8A (2.7)	MRPS31 (2.2)	CUL5 (1.8)	NPAT (1.7)	TNRC6B (1.7)	PSMD13 (1.4)	ZNF346 (1.4)	FOXO1 (1.3)	FIP1L1 (1.3)
ENSG00000085063	CD59 PPI subnetwork	0.07	0.900598	SULT1B1 (2.8)	SCGB1C1 (2.7)	ODF3 (1.7)	SLC25A15 (1.4)	CD44 (1.4)	SALL1 (1.1)	CDC42 (1.0)	ENSG00000184378 (1.0)	EXPH5 (1.0)	ENSG00000226403 (0.8)
GO:0031576	G2/M transition checkpoint	0.07	0.900598	CDC42-IT1 (2.7)	TERT (2.2)	OBFC1 (2.1)	ENSG00000228397 (1.8)	NPAT (1.8)	ZNF346 (1.6)	ENSG00000226403 (1.5)	KDELC2 (1.3)	FIP1L1 (1.2)	MRPS31 (1.0)
GO:0016202	regulation of striated muscle tissue development	0.07	0.900598	KANK1 (2.2)	LINC00339 (1.4)	FOXO1 (1.4)	SCGB1C1 (1.3)	GREB1 (1.3)	SLC38A2 (1.3)	ZNF346 (1.2)	WT1-AS (1.0)	TNRC6B (1.0)	CDC42-IT1 (1.0)
ENSG00000097046	CDC7 PPI subnetwork	0.07	0.900598	NPAT (4.4)	KDELC2 (1.9)	FIP1L1 (1.5)	SLC38A2 (1.1)	OBFC1 (1.0)	UIMC1 (0.9)	ACAT1 (0.9)	ENSG00000228397 (0.8)	MRPS31 (0.7)	ATM (0.7)
ENSG00000110244	APOA4 PPI subnetwork	0.07	0.900598	SLC25A15 (3.3)	WNT4 (2.7)	GREB1 (2.5)	LNX1 (2.2)	TNRC6B (1.9)	SLC38A1 (1.7)	SALL1 (1.3)	ODF3 (1.1)	CUL5 (1.0)	NPAT (0.9)
MP:0001147	small testis	0.07	0.900598	DMRT1 (6.9)	WT1-AS (2.8)	ENSG00000226403 (2.8)	UIMC1 (1.8)	KANK1 (1.7)	FIP1L1 (1.6)	KDELC2 (1.6)	ODF3 (1.4)	C11orf65 (1.4)	NPAT (1.3)
GO:0042562	hormone binding	0.07	0.900598	GREB1 (4.9)	FOXO1 (3.2)	WNT4 (3.0)	WT1-AS (2.5)	KANK1 (1.5)	LINC00339 (1.5)	SALL1 (1.3)	LRRC31 (1.2)	TNRC6B (0.9)	LNX1 (0.8)
ENSG00000120697	ALG5 PPI subnetwork	0.07	0.900598	KDELC2 (2.5)	ENSG00000258096 (1.7)	SLC38A2 (1.5)	SULT1B1 (1.5)	SLC25A15 (1.5)	ODF3 (1.4)	OBFC1 (1.3)	BET1L (1.2)	SLC38A1 (1.2)	LINC00339 (1.1)
ENSG00000149182	ARFGAP2 PPI subnetwork	0.07	0.900598	BET1L (6.2)	COG6 (4.8)	MYNN (4.2)	RIC8A (3.5)	LRRC31 (3.4)	PSMD13 (2.7)	ATM (1.8)	ENSG00000184378 (1.5)	SIRT3 (1.3)	ENSG00000258096 (1.3)
GO:0009395	phospholipid catabolic process	0.07	0.900598	KANK1 (2.1)	CDC42-IT1 (1.8)	LNX1 (1.6)	COG6 (1.5)	SYNE1 (1.4)	LRRC34 (1.2)	SALL1 (1.0)	KDELC2 (1.0)	ENSG00000226403 (0.9)	SULT1B1 (0.9)
GO:0016725	oxidoreductase activity, acting on CH or CH2 groups	0.07	0.900598	SULT1B1 (4.0)	SLC25A15 (3.3)	ODF3 (1.7)	CDC42-IT1 (1.3)	SALL1 (1.3)	SYNE1 (1.2)	TERT (1.2)	EXPH5 (1.1)	RIC8A (1.0)	ENSG00000226403 (0.9)
MP:0008140	podocyte foot process effacement	0.07	0.900598	WT1-AS (7.9)	OBFC1 (1.9)	ENSG00000226403 (1.9)	SYNE1 (1.9)	BET1L (1.6)	C11orf65 (1.4)	ENSG00000258096 (1.3)	RIC8A (1.2)	WNT4 (1.2)	SALL1 (1.2)
ENSG00000139921	TMX1 PPI subnetwork	0.07	0.900598	TNRC6B (2.2)	NPAT (1.9)	EXPH5 (1.9)	SYNE1 (1.7)	ATM (1.7)	CUL5 (1.7)	UIMC1 (1.6)	OBFC1 (1.4)	COG6 (1.3)	SIRT3 (1.2)
GO:0016765	transferase activity, transferring alkyl or aryl (other than methyl) groups	0.07	0.900598	ACAT1 (2.2)	EXPH5 (1.9)	OBFC1 (1.8)	BET1L (1.5)	LRRC31 (1.3)	COG6 (1.3)	C11orf65 (1.2)	MRPS31 (1.2)	ENSG00000258096 (1.2)	LINC00339 (1.1)
REACTOME_PI3K_EVENTS_IN_ERBB4_SIGNALING	REACTOME_PI3K_EVENTS_IN_ERBB4_SIGNALING	0.07	0.900598	FOXO1 (2.5)	MYNN (2.4)	TNRC6B (2.1)	BET1L (1.8)	SLC38A2 (1.7)	RIC8A (1.6)	SULT1B1 (1.5)	WT1-AS (1.1)	SLC38A1 (1.1)	ENSG00000258096 (1.1)
ENSG00000149554	CHEK1 PPI subnetwork	0.07	0.900598	NPAT (2.7)	ATM (1.4)	FIP1L1 (1.2)	COG6 (1.1)	TERT (1.0)	CD44 (0.9)	OBFC1 (0.9)	DMRT1 (0.9)	LINC00339 (0.9)	MRPS31 (0.8)
MP:0002641	anisopoikilocytosis	0.07	0.900598	SLC25A15 (2.4)	COG6 (1.3)	SLC38A2 (1.3)	SYNE1 (1.2)	HK3 (1.2)	RIC8A (1.2)	SLC38A1 (1.1)	LNX1 (1.0)	ENSG00000258096 (0.9)	SULT1B1 (0.8)
ENSG00000114423	CBLB PPI subnetwork	0.07	0.900598	C11orf65 (2.3)	FOXO1 (1.9)	SLC38A1 (1.8)	CDC42 (1.4)	HK3 (1.4)	SLC38A2 (1.3)	KANK1 (1.2)	CD44 (1.2)	LRRC34 (1.1)	KDELC2 (1.0)
ENSG00000103510	KAT8 PPI subnetwork	0.07	0.900598	MRPS31 (1.8)	UIMC1 (1.8)	LINC00339 (1.7)	CDC42-IT1 (1.4)	ENSG00000228397 (1.2)	DMRT1 (1.2)	ATM (1.1)	ENSG00000184378 (1.0)	TNRC6B (1.0)	COG6 (1.0)
ENSG00000102096	PIM2 PPI subnetwork	0.07	0.900598	SIRT3 (2.4)	DMRT1 (2.2)	ACAT1 (1.6)	ODF3 (1.5)	OBFC1 (1.5)	KANK1 (1.5)	LNX1 (1.5)	SLC25A15 (1.3)	PSMD13 (1.3)	SH3PXD2A (1.2)
ENSG00000151846	PABPC3 PPI subnetwork	0.07	0.900598	FIP1L1 (1.8)	CDC42-IT1 (1.4)	OBFC1 (1.3)	KANK1 (1.2)	KDELC2 (1.2)	ZNF346 (1.1)	SLC38A1 (1.0)	CD44 (1.0)	TNRC6B (1.0)	SYNE1 (0.9)
ENSG00000132604	TERF2 PPI subnetwork	0.07	0.900598	NPAT (2.5)	OBFC1 (1.7)	ENSG00000228397 (1.7)	TERT (1.5)	FIP1L1 (1.5)	UIMC1 (1.4)	ATM (1.3)	SCGB1C1 (1.2)	SYNE1 (1.2)	CDC42-IT1 (1.1)
GO:0006694	steroid biosynthetic process	0.07	0.900598	LRRC31 (2.8)	DMRT1 (2.1)	SULT1B1 (1.9)	LRRC34 (1.5)	GREB1 (1.3)	EXPH5 (1.1)	LNX1 (0.9)	ODF3 (0.8)	OBFC1 (0.7)	ACAT1 (0.7)
KEGG_LINOLEIC_ACID_METABOLISM	KEGG_LINOLEIC_ACID_METABOLISM	0.07	0.900598	SULT1B1 (3.2)	SLC25A15 (2.7)	EXPH5 (1.7)	KANK1 (1.6)	LRRC31 (1.6)	CDC42-IT1 (1.3)	SCGB1C1 (1.3)	ODF3 (1.2)	OBFC1 (1.2)	C11orf65 (1.0)
GO:0030529	ribonucleoprotein complex	0.07	0.900598	MRPS31 (3.3)	FIP1L1 (2.5)	UIMC1 (1.9)	PSMD13 (1.8)	DMRT1 (1.6)	CUL5 (1.1)	TERT (1.0)	CDC42 (0.7)	LINC00339 (0.3)	C11orf65 (0.3)
GO:0008209	androgen metabolic process	0.07	0.900598	GREB1 (3.0)	EXPH5 (1.8)	OBFC1 (1.7)	CDC42-IT1 (1.6)	DMRT1 (1.4)	SLC25A15 (1.3)	SULT1B1 (1.3)	ZNF346 (1.2)	ENSG00000228397 (1.1)	LNX1 (1.1)
GO:0016571	histone methylation	0.07	0.900598	TERT (3.1)	ZNF346 (2.8)	UIMC1 (2.3)	ATM (2.0)	NPAT (1.9)	LRRC34 (1.7)	TNRC6B (1.5)	FIP1L1 (1.0)	COG6 (1.0)	ENSG00000184378 (0.9)
GO:0009266	response to temperature stimulus	0.07	0.900598	LRRC34 (3.2)	ENSG00000226403 (2.4)	KANK1 (1.8)	ODF3 (1.8)	LINC00339 (1.3)	ACAT1 (1.3)	ZNF346 (1.2)	SLC38A2 (1.1)	CD44 (1.0)	LNX1 (1.0)
GO:0016585	chromatin remodeling complex	0.07	0.900598	TNRC6B (3.0)	FIP1L1 (2.3)	TERT (1.9)	CUL5 (1.6)	UIMC1 (1.4)	MRPS31 (1.3)	DMRT1 (1.0)	NPAT (1.0)	RIC8A (0.9)	SH3PXD2A (0.8)
MP:0003050	abnormal sacral vertebrae morphology	0.07	0.900598	SALL1 (6.3)	WT1-AS (2.5)	KANK1 (1.8)	SLC38A1 (1.7)	DMRT1 (1.6)	ENSG00000226403 (1.6)	TERT (1.5)	TNRC6B (1.5)	ATM (1.4)	WNT4 (1.3)
ENSG00000082701	GSK3B PPI subnetwork	0.07	0.900598	SH3PXD2A (2.2)	TNRC6B (2.0)	SLC38A1 (1.9)	GREB1 (1.7)	SALL1 (1.7)	FOXO1 (1.7)	SLC38A2 (1.5)	RIC8A (1.5)	ODF3 (1.3)	CDC42 (1.1)
GO:0034698	response to gonadotropin stimulus	0.07	0.900598	WT1-AS (5.0)	DMRT1 (3.7)	ODF3 (2.5)	GREB1 (1.3)	EXPH5 (1.1)	WNT4 (1.0)	ACAT1 (0.8)	MYNN (0.8)	SCGB1C1 (0.8)	ENSG00000226403 (0.7)
ENSG00000185621	LMLN PPI subnetwork	0.07	0.900598	CUL5 (2.9)	ATM (2.3)	NPAT (1.9)	SLC38A2 (1.8)	GREB1 (1.4)	SH3PXD2A (1.3)	FOXO1 (1.2)	BET1L (1.2)	PSMD13 (0.8)	ACAT1 (0.8)
ENSG00000186842	ENSG00000186842 PPI subnetwork	0.07	0.900598	PSMD13 (2.4)	FIP1L1 (1.6)	OBFC1 (1.4)	SH3PXD2A (1.2)	SALL1 (1.2)	FOXO1 (1.0)	CDC42 (0.8)	TERT (0.8)	ZNF346 (0.7)	CD44 (0.7)
MP:0001925	male infertility	0.07	0.900598	DMRT1 (6.7)	ODF3 (3.9)	C11orf65 (2.8)	ENSG00000184378 (2.1)	LRRC34 (1.9)	WT1-AS (1.8)	UIMC1 (1.3)	TNRC6B (1.3)	ENSG00000226403 (1.1)	SALL1 (0.8)
ENSG00000117461	PIK3R3 PPI subnetwork	0.07	0.900598	HK3 (3.0)	MYNN (1.8)	SULT1B1 (1.8)	SIRT3 (1.6)	BET1L (1.6)	WT1-AS (1.5)	C11orf65 (1.5)	GREB1 (1.4)	LRRC31 (1.3)	WNT4 (1.3)
ENSG00000180573	HIST1H2AC PPI subnetwork	0.07	0.900598	SCGB1C1 (3.3)	CUL5 (3.3)	FIP1L1 (2.4)	NPAT (2.0)	ATM (1.9)	DMRT1 (1.7)	MRPS31 (1.5)	SLC38A1 (1.4)	UIMC1 (0.9)	ENSG00000258096 (0.7)
GO:0051259	protein oligomerization	0.07	0.900598	SIRT3 (2.2)	ACAT1 (1.6)	SYNE1 (1.6)	DMRT1 (1.6)	SLC25A15 (1.5)	RIC8A (1.4)	ZNF346 (1.3)	KDELC2 (1.1)	ENSG00000226403 (1.0)	EXPH5 (1.0)
GO:0034968	histone lysine methylation	0.07	0.900598	TERT (3.0)	UIMC1 (2.4)	NPAT (2.2)	ATM (2.1)	TNRC6B (2.0)	ZNF346 (1.9)	DMRT1 (1.2)	ENSG00000228397 (1.2)	WT1-AS (1.1)	LRRC34 (1.1)
ENSG00000126351	THRA PPI subnetwork	0.07	0.900598	TNRC6B (5.1)	SALL1 (2.6)	FIP1L1 (1.6)	CDC42 (1.5)	FOXO1 (1.3)	UIMC1 (1.2)	RIC8A (1.1)	MRPS31 (0.9)	ATM (0.9)	SH3PXD2A (0.8)
ENSG00000109072	SEBOX PPI subnetwork	0.07	0.900598	WT1-AS (2.6)	SCGB1C1 (2.3)	SALL1 (2.3)	LRRC31 (1.8)	WNT4 (1.7)	CD44 (1.6)	SYNE1 (1.6)	SIRT3 (1.6)	SH3PXD2A (1.2)	RIC8A (1.1)
ENSG00000147439	BIN3 PPI subnetwork	0.07	0.900598	CDC42 (3.3)	PSMD13 (2.0)	SYNE1 (1.4)	ENSG00000184378 (1.2)	SLC25A15 (1.1)	SALL1 (1.0)	FIP1L1 (1.0)	CDC42-IT1 (0.9)	TERT (0.9)	RIC8A (0.8)
REACTOME_UNFOLDED_PROTEIN_RESPONSE	REACTOME_UNFOLDED_PROTEIN_RESPONSE	0.07	0.900598	BET1L (4.5)	SLC38A2 (2.9)	MYNN (1.6)	COG6 (1.4)	KDELC2 (1.3)	SLC25A15 (1.3)	PSMD13 (1.0)	MRPS31 (0.9)	C11orf65 (0.9)	RIC8A (0.9)
GO:0003006	developmental process involved in reproduction	0.07	0.900598	DMRT1 (5.1)	GREB1 (3.8)	ODF3 (3.6)	ENSG00000184378 (2.0)	C11orf65 (2.0)	WT1-AS (1.8)	ENSG00000226403 (1.7)	KANK1 (1.7)	LRRC34 (1.5)	WNT4 (1.5)
GO:0043046	DNA methylation involved in gamete generation	0.07	0.900598	C11orf65 (5.7)	DMRT1 (3.5)	ENSG00000226403 (2.7)	ENSG00000184378 (2.0)	COG6 (1.8)	TERT (1.4)	OBFC1 (1.0)	UIMC1 (0.9)	LRRC31 (0.8)	KDELC2 (0.8)
ENSG00000103671	TRIP4 PPI subnetwork	0.07	0.900598	TNRC6B (2.9)	LRRC31 (1.5)	OBFC1 (1.2)	FOXO1 (1.1)	WT1-AS (1.1)	RIC8A (1.0)	BET1L (1.0)	SLC38A1 (0.9)	C11orf65 (0.8)	UIMC1 (0.7)
ENSG00000169057	MECP2 PPI subnetwork	0.07	0.900598	TNRC6B (2.9)	FIP1L1 (2.5)	KDELC2 (2.3)	ENSG00000184378 (2.1)	DMRT1 (2.0)	CUL5 (1.6)	ENSG00000226403 (1.3)	SH3PXD2A (1.2)	CDC42 (1.0)	CDC42-IT1 (0.8)
ENSG00000158406	HIST1H4H PPI subnetwork	0.07	0.900598	CUL5 (2.5)	FIP1L1 (2.5)	ATM (2.2)	SCGB1C1 (2.1)	TNRC6B (2.1)	SLC38A2 (1.9)	NPAT (1.8)	PSMD13 (1.3)	ENSG00000228397 (1.3)	CDC42 (1.1)
ENSG00000197061	HIST1H4C PPI subnetwork	0.07	0.900598	CUL5 (2.5)	FIP1L1 (2.5)	ATM (2.2)	SCGB1C1 (2.1)	TNRC6B (2.1)	SLC38A2 (1.9)	NPAT (1.8)	PSMD13 (1.3)	ENSG00000228397 (1.3)	CDC42 (1.1)
ENSG00000197914	HIST1H4K PPI subnetwork	0.07	0.900598	CUL5 (2.5)	FIP1L1 (2.5)	ATM (2.2)	SCGB1C1 (2.1)	TNRC6B (2.1)	SLC38A2 (1.9)	NPAT (1.8)	PSMD13 (1.3)	ENSG00000228397 (1.3)	CDC42 (1.1)
ENSG00000188987	HIST1H4D PPI subnetwork	0.07	0.900598	CUL5 (2.5)	FIP1L1 (2.5)	ATM (2.2)	SCGB1C1 (2.1)	TNRC6B (2.1)	SLC38A2 (1.9)	NPAT (1.8)	PSMD13 (1.3)	ENSG00000228397 (1.3)	CDC42 (1.1)
ENSG00000198327	HIST1H4F PPI subnetwork	0.07	0.900598	CUL5 (2.5)	FIP1L1 (2.5)	ATM (2.2)	SCGB1C1 (2.1)	TNRC6B (2.1)	SLC38A2 (1.9)	NPAT (1.8)	PSMD13 (1.3)	ENSG00000228397 (1.3)	CDC42 (1.1)
ENSG00000196176	HIST1H4A PPI subnetwork	0.07	0.900598	CUL5 (2.5)	FIP1L1 (2.5)	ATM (2.2)	SCGB1C1 (2.1)	TNRC6B (2.1)	SLC38A2 (1.9)	NPAT (1.8)	PSMD13 (1.3)	ENSG00000228397 (1.3)	CDC42 (1.1)
ENSG00000198518	HIST1H4E PPI subnetwork	0.07	0.900598	CUL5 (2.5)	FIP1L1 (2.5)	ATM (2.2)	SCGB1C1 (2.1)	TNRC6B (2.1)	SLC38A2 (1.9)	NPAT (1.8)	PSMD13 (1.3)	ENSG00000228397 (1.3)	CDC42 (1.1)
ENSG00000183941	HIST2H4A PPI subnetwork	0.07	0.900598	CUL5 (2.5)	FIP1L1 (2.5)	ATM (2.2)	SCGB1C1 (2.1)	TNRC6B (2.1)	SLC38A2 (1.9)	NPAT (1.8)	PSMD13 (1.3)	ENSG00000228397 (1.3)	CDC42 (1.1)
ENSG00000197238	HIST1H4J PPI subnetwork	0.07	0.900598	CUL5 (2.5)	FIP1L1 (2.5)	ATM (2.2)	SCGB1C1 (2.1)	TNRC6B (2.1)	SLC38A2 (1.9)	NPAT (1.8)	PSMD13 (1.3)	ENSG00000228397 (1.3)	CDC42 (1.1)
ENSG00000197837	HIST4H4 PPI subnetwork	0.07	0.900598	CUL5 (2.5)	FIP1L1 (2.5)	ATM (2.2)	SCGB1C1 (2.1)	TNRC6B (2.1)	SLC38A2 (1.9)	NPAT (1.8)	PSMD13 (1.3)	ENSG00000228397 (1.3)	CDC42 (1.1)
ENSG00000124529	HIST1H4B PPI subnetwork	0.07	0.900598	CUL5 (2.5)	FIP1L1 (2.5)	ATM (2.2)	SCGB1C1 (2.1)	TNRC6B (2.1)	SLC38A2 (1.9)	NPAT (1.8)	PSMD13 (1.3)	ENSG00000228397 (1.3)	CDC42 (1.1)
ENSG00000182217	HIST2H4B PPI subnetwork	0.07	0.900598	CUL5 (2.5)	FIP1L1 (2.5)	ATM (2.2)	SCGB1C1 (2.1)	TNRC6B (2.1)	SLC38A2 (1.9)	NPAT (1.8)	PSMD13 (1.3)	ENSG00000228397 (1.3)	CDC42 (1.1)
ENSG00000198339	HIST1H4I PPI subnetwork	0.07	0.900598	CUL5 (2.5)	FIP1L1 (2.5)	ATM (2.2)	SCGB1C1 (2.1)	TNRC6B (2.1)	SLC38A2 (1.9)	NPAT (1.8)	PSMD13 (1.3)	ENSG00000228397 (1.3)	CDC42 (1.1)
ENSG00000198558	HIST1H4L PPI subnetwork	0.07	0.900598	CUL5 (2.5)	FIP1L1 (2.5)	ATM (2.2)	SCGB1C1 (2.1)	TNRC6B (2.1)	SLC38A2 (1.9)	NPAT (1.8)	PSMD13 (1.3)	ENSG00000228397 (1.3)	CDC42 (1.1)
ENSG00000197943	PLCG2 PPI subnetwork	0.08	0.900598	WT1-AS (3.6)	FOXO1 (2.1)	KANK1 (1.8)	FIP1L1 (1.6)	HK3 (1.5)	TERT (1.5)	SLC38A1 (1.5)	C11orf65 (1.4)	RIC8A (0.7)	SLC38A2 (0.6)
ENSG00000074319	TSG101 PPI subnetwork	0.08	0.900598	RIC8A (3.5)	LRRC34 (1.8)	SLC38A2 (1.7)	OBFC1 (1.5)	SYNE1 (1.3)	PSMD13 (1.2)	HK3 (1.1)	FIP1L1 (1.0)	C11orf65 (1.0)	BET1L (0.9)
ENSG00000196285	ENSG00000196285 PPI subnetwork	0.08	0.900598	ATM (2.4)	TNRC6B (2.4)	SCGB1C1 (2.3)	CUL5 (1.9)	ENSG00000228397 (1.8)	FIP1L1 (1.2)	CDC42-IT1 (1.2)	NPAT (1.0)	SLC38A2 (1.0)	UIMC1 (1.0)
ENSG00000132475	H3F3B PPI subnetwork	0.08	0.900598	ATM (2.4)	TNRC6B (2.4)	SCGB1C1 (2.3)	CUL5 (1.9)	ENSG00000228397 (1.8)	FIP1L1 (1.2)	CDC42-IT1 (1.2)	NPAT (1.0)	SLC38A2 (1.0)	UIMC1 (1.0)
ENSG00000163041	H3F3A PPI subnetwork	0.08	0.900598	ATM (2.4)	TNRC6B (2.4)	SCGB1C1 (2.3)	CUL5 (1.9)	ENSG00000228397 (1.8)	FIP1L1 (1.2)	CDC42-IT1 (1.2)	NPAT (1.0)	SLC38A2 (1.0)	UIMC1 (1.0)
GO:0016887	ATPase activity	0.08	0.900598	ATM (2.5)	SYNE1 (2.4)	CUL5 (1.6)	FIP1L1 (1.5)	ACAT1 (1.3)	TERT (1.3)	UIMC1 (1.3)	DMRT1 (1.1)	NPAT (1.0)	LRRC34 (0.9)
GO:0019953	sexual reproduction	0.08	0.900598	ODF3 (5.7)	C11orf65 (4.0)	DMRT1 (3.9)	ENSG00000226403 (2.4)	ENSG00000184378 (2.0)	LRRC34 (1.7)	ENSG00000258096 (1.1)	GREB1 (1.0)	UIMC1 (1.0)	LRRC31 (0.6)
ENSG00000147689	FAM83A PPI subnetwork	0.08	0.900598	NPAT (2.1)	UIMC1 (2.0)	TNRC6B (2.0)	LRRC31 (1.6)	EXPH5 (1.5)	SYNE1 (1.4)	SLC38A2 (1.4)	ATM (1.3)	COG6 (1.3)	HK3 (1.2)
MP:0006298	abnormal platelet activation	0.08	0.900598	SCGB1C1 (3.7)	SLC25A15 (2.3)	WT1-AS (2.1)	HK3 (2.0)	ENSG00000226403 (1.4)	SIRT3 (1.3)	LRRC34 (1.3)	C11orf65 (1.2)	DMRT1 (1.2)	CD44 (0.9)
MP:0000250	abnormal vasoconstriction	0.08	0.900598	SYNE1 (3.3)	ENSG00000258096 (2.5)	CD44 (1.8)	RIC8A (1.7)	LINC00339 (1.5)	C11orf65 (1.4)	KANK1 (1.4)	TERT (1.2)	GREB1 (1.2)	SLC25A15 (1.2)
GO:0016229	steroid dehydrogenase activity	0.08	0.900598	MRPS31 (2.0)	LRRC31 (1.9)	SALL1 (1.4)	SULT1B1 (1.4)	C11orf65 (1.3)	LINC00339 (1.2)	ACAT1 (1.2)	LNX1 (1.2)	EXPH5 (1.2)	SLC25A15 (1.1)
MP:0005108	abnormal ulna morphology	0.08	0.900598	SALL1 (6.1)	WNT4 (2.9)	SH3PXD2A (2.3)	GREB1 (2.3)	ENSG00000228397 (2.0)	BET1L (1.8)	RIC8A (1.7)	ENSG00000184378 (1.7)	WT1-AS (1.4)	LRRC34 (1.4)
MP:0004876	decreased mean systemic arterial blood pressure	0.08	0.900598	SYNE1 (3.9)	KANK1 (2.5)	LINC00339 (2.2)	SULT1B1 (1.3)	SLC38A2 (1.3)	CD44 (1.2)	GREB1 (1.1)	ENSG00000184378 (0.8)	WT1-AS (0.6)	C11orf65 (0.6)
MP:0006380	abnormal spermatid morphology	0.08	0.900598	DMRT1 (4.1)	ODF3 (2.7)	UIMC1 (1.6)	C11orf65 (1.6)	FOXO1 (1.3)	ACAT1 (1.0)	COG6 (1.0)	NPAT (1.0)	SULT1B1 (0.9)	LRRC31 (0.8)
MP:0009504	abnormal mammary gland epithelium morphology	0.08	0.900598	GREB1 (7.2)	WNT4 (2.8)	KANK1 (1.8)	FOXO1 (1.8)	ENSG00000228397 (1.7)	TERT (1.4)	ENSG00000226403 (1.4)	CD44 (1.2)	LRRC34 (1.1)	ENSG00000184378 (1.1)
GO:0070670	response to interleukin-4	0.08	0.900598	ENSG00000258096 (2.2)	ZNF346 (1.5)	KDELC2 (1.5)	OBFC1 (1.4)	ATM (1.3)	C11orf65 (1.3)	ENSG00000228397 (1.2)	DMRT1 (1.1)	GREB1 (1.0)	CDC42-IT1 (0.8)
GO:0060324	face development	0.08	0.900598	GREB1 (2.6)	SALL1 (2.5)	EXPH5 (2.5)	SH3PXD2A (2.3)	ENSG00000226403 (1.9)	WNT4 (1.7)	FOXO1 (1.7)	OBFC1 (1.7)	FIP1L1 (1.5)	SLC38A2 (1.4)
ENSG00000074266	EED PPI subnetwork	0.08	0.900598	NPAT (2.7)	ZNF346 (2.2)	CUL5 (1.8)	OBFC1 (1.8)	LRRC31 (1.5)	UIMC1 (1.3)	COG6 (1.2)	CDC42 (1.1)	MYNN (0.9)	CD44 (0.8)
GO:0019783	small conjugating protein-specific protease activity	0.08	0.900598	CUL5 (3.7)	FIP1L1 (2.2)	NPAT (2.1)	UIMC1 (1.8)	MYNN (1.5)	WT1-AS (1.3)	EXPH5 (1.2)	SIRT3 (1.1)	PSMD13 (1.0)	LNX1 (0.9)
ENSG00000131788	PIAS3 PPI subnetwork	0.08	0.900598	GREB1 (4.8)	FOXO1 (3.8)	TNRC6B (3.2)	CD44 (2.0)	SALL1 (1.8)	RIC8A (1.3)	ENSG00000184378 (1.3)	ENSG00000226403 (1.3)	KANK1 (1.2)	BET1L (1.2)
ENSG00000094804	CDC6 PPI subnetwork	0.08	0.900598	PSMD13 (3.5)	NPAT (2.1)	LINC00339 (1.7)	MRPS31 (1.7)	CDC42 (1.6)	ENSG00000228397 (1.3)	FIP1L1 (1.3)	ENSG00000258096 (1.2)	KDELC2 (1.2)	ACAT1 (1.1)
MP:0008261	arrest of male meiosis	0.08	0.900598	DMRT1 (6.6)	C11orf65 (3.7)	UIMC1 (2.5)	ENSG00000226403 (1.8)	COG6 (1.4)	LRRC34 (1.2)	FIP1L1 (1.2)	KDELC2 (1.0)	ZNF346 (0.9)	TNRC6B (0.9)
MP:0011506	glomerular crescent	0.08	0.900598	WT1-AS (7.4)	DMRT1 (1.5)	BET1L (1.4)	WNT4 (1.3)	UIMC1 (1.2)	ENSG00000226403 (1.1)	SIRT3 (1.1)	CD44 (1.0)	MRPS31 (1.0)	RIC8A (0.9)
ENSG00000175333	ENSG00000175333 PPI subnetwork	0.08	0.900598	ENSG00000226403 (1.6)	BET1L (1.6)	DMRT1 (1.5)	WT1-AS (1.2)	ZNF346 (1.1)	SULT1B1 (1.0)	CUL5 (0.9)	RIC8A (0.8)	MRPS31 (0.8)	KANK1 (0.8)
GO:0030518	intracellular steroid hormone receptor signaling pathway	0.08	0.900598	GREB1 (3.1)	TNRC6B (2.7)	CUL5 (1.5)	CDC42-IT1 (1.4)	MRPS31 (1.4)	SLC38A2 (1.1)	LINC00339 (1.1)	SH3PXD2A (0.7)	NPAT (0.7)	OBFC1 (0.7)
ENSG00000169621	APLF PPI subnetwork	0.08	0.900598	OBFC1 (3.1)	C11orf65 (2.3)	MRPS31 (2.3)	FOXO1 (2.2)	FIP1L1 (2.1)	ATM (1.9)	ODF3 (1.7)	COG6 (1.5)	NPAT (1.5)	TNRC6B (1.4)
MP:0002085	abnormal embryonic tissue morphology	0.08	0.900598	SALL1 (3.5)	WNT4 (2.0)	SH3PXD2A (2.0)	TNRC6B (1.7)	GREB1 (1.3)	WT1-AS (1.3)	EXPH5 (1.2)	ATM (1.2)	TERT (1.1)	KANK1 (0.9)
GO:0044427	chromosomal part	0.08	0.900598	NPAT (3.2)	ATM (1.8)	TNRC6B (1.7)	SLC38A2 (1.7)	FIP1L1 (1.6)	UIMC1 (1.5)	ENSG00000228397 (1.5)	KDELC2 (1.2)	ZNF346 (1.1)	MRPS31 (0.9)
ENSG00000141506	PIK3R5 PPI subnetwork	0.08	0.900598	HK3 (3.1)	SULT1B1 (1.9)	GREB1 (1.8)	BET1L (1.7)	SIRT3 (1.6)	WNT4 (1.5)	FOXO1 (1.4)	C11orf65 (1.3)	LRRC31 (1.2)	RIC8A (1.1)
ENSG00000101199	ARFGAP1 PPI subnetwork	0.08	0.900598	BET1L (4.6)	COG6 (4.2)	RIC8A (2.4)	PSMD13 (2.0)	CUL5 (1.4)	CDC42 (1.3)	LINC00339 (1.3)	MYNN (1.0)	SALL1 (1.0)	ATM (1.0)
ENSG00000119812	FAM98A PPI subnetwork	0.08	0.900598	TNRC6B (4.7)	ZNF346 (1.9)	ENSG00000228397 (1.4)	BET1L (1.2)	SCGB1C1 (1.2)	DMRT1 (1.2)	ENSG00000184378 (1.0)	ATM (1.0)	UIMC1 (0.9)	CD44 (0.8)
GO:0030137	COPI-coated vesicle	0.08	0.900598	BET1L (5.2)	COG6 (4.9)	ACAT1 (2.1)	ATM (2.0)	MYNN (1.7)	RIC8A (1.6)	LINC00339 (1.6)	KDELC2 (1.4)	ENSG00000184378 (1.3)	DMRT1 (1.1)
GO:0043044	ATP-dependent chromatin remodeling	0.08	0.900598	ENSG00000228397 (2.3)	NPAT (1.8)	KDELC2 (1.8)	ODF3 (1.7)	ENSG00000258096 (1.6)	ENSG00000226403 (1.5)	ATM (1.5)	CUL5 (1.3)	FIP1L1 (1.2)	ZNF346 (1.2)
MP:0010103	small thoracic cage	0.08	0.900598	KANK1 (2.9)	SLC38A1 (1.9)	ENSG00000228397 (1.8)	CD44 (1.7)	TNRC6B (1.4)	LINC00339 (1.3)	SALL1 (1.3)	BET1L (1.2)	FOXO1 (1.1)	LNX1 (1.0)
ENSG00000129691	ASH2L PPI subnetwork	0.08	0.900598	UIMC1 (2.1)	COG6 (2.0)	TNRC6B (1.9)	NPAT (1.6)	ATM (1.6)	ENSG00000184378 (1.2)	DMRT1 (1.1)	CDC42 (1.0)	LINC00339 (0.9)	FIP1L1 (0.9)
GO:0070193	synaptonemal complex organization	0.08	0.900598	DMRT1 (2.9)	ENSG00000184378 (2.6)	KDELC2 (1.9)	ZNF346 (1.8)	ATM (1.5)	SCGB1C1 (1.3)	TERT (1.2)	LRRC34 (1.2)	C11orf65 (1.1)	COG6 (1.1)
ENSG00000092853	CLSPN PPI subnetwork	0.08	0.900598	NPAT (4.3)	KDELC2 (2.4)	ENSG00000184378 (1.8)	OBFC1 (1.6)	ATM (1.6)	MYNN (1.4)	ENSG00000228397 (1.3)	FIP1L1 (1.0)	ZNF346 (0.9)	MRPS31 (0.8)
GO:0090312	positive regulation of protein deacetylation	0.08	0.900598	LINC00339 (2.1)	CDC42-IT1 (1.9)	COG6 (1.3)	ENSG00000258096 (1.3)	SCGB1C1 (1.2)	NPAT (1.2)	ATM (1.1)	SLC38A2 (1.1)	TERT (1.0)	SLC25A15 (0.9)
GO:0000049	tRNA binding	0.08	0.900598	RIC8A (3.0)	SLC38A1 (2.4)	SLC38A2 (1.9)	SIRT3 (1.8)	MRPS31 (1.7)	UIMC1 (1.1)	HK3 (0.9)	ENSG00000184378 (0.8)	KDELC2 (0.8)	FIP1L1 (0.7)
ENSG00000154582	TCEB1 PPI subnetwork	0.08	0.900598	FIP1L1 (3.3)	RIC8A (2.8)	PSMD13 (2.7)	MYNN (2.3)	BET1L (2.3)	CUL5 (2.0)	TERT (1.6)	MRPS31 (1.3)	NPAT (1.2)	UIMC1 (1.1)
MP:0005325	abnormal renal glomerulus morphology	0.08	0.900598	WT1-AS (4.3)	ENSG00000226403 (1.9)	FOXO1 (1.9)	WNT4 (1.8)	SYNE1 (1.5)	DMRT1 (1.3)	KANK1 (1.2)	SULT1B1 (1.0)	GREB1 (0.8)	OBFC1 (0.8)
GO:0005501	retinoid binding	0.08	0.900598	WNT4 (2.3)	WT1-AS (2.1)	GREB1 (1.9)	LRRC34 (1.8)	TERT (1.7)	SULT1B1 (1.4)	SALL1 (1.3)	ODF3 (1.2)	KANK1 (1.1)	DMRT1 (1.0)
ENSG00000131504	DIAPH1 PPI subnetwork	0.08	0.900598	SYNE1 (2.8)	CDC42 (2.0)	PSMD13 (2.0)	CDC42-IT1 (1.3)	OBFC1 (1.1)	FIP1L1 (1.1)	HK3 (1.0)	C11orf65 (0.8)	EXPH5 (0.7)	ENSG00000184378 (0.7)
GO:0016180	snRNA processing	0.08	0.900598	MRPS31 (3.3)	OBFC1 (1.9)	NPAT (1.7)	MYNN (1.7)	FIP1L1 (1.6)	ATM (1.5)	COG6 (1.5)	CUL5 (1.3)	LNX1 (1.2)	TERT (1.1)
REACTOME_VIRAL_MESSENGER_RNA_SYNTHESIS	REACTOME_VIRAL_MESSENGER_RNA_SYNTHESIS	0.08	0.900598	MRPS31 (2.8)	RIC8A (2.5)	BET1L (2.3)	PSMD13 (2.2)	FIP1L1 (2.0)	SIRT3 (1.5)	SLC25A15 (1.3)	MYNN (1.3)	DMRT1 (1.2)	WNT4 (1.1)
ENSG00000136869	TLR4 PPI subnetwork	0.08	0.900598	CD44 (3.4)	HK3 (3.3)	BET1L (2.6)	RIC8A (2.5)	SULT1B1 (2.0)	COG6 (1.0)	PSMD13 (0.8)	LNX1 (0.8)	SALL1 (0.7)	NPAT (0.7)
REACTOME_E2F:ENABLED_INHIBITION_OF_PRE:REPLICATION_COMPLEX_FORMATION	REACTOME_E2F:ENABLED_INHIBITION_OF_PRE:REPLICATION_COMPLEX_FORMATION	0.08	0.900598	NPAT (3.6)	MRPS31 (2.8)	FIP1L1 (1.8)	ENSG00000228397 (1.4)	KDELC2 (1.3)	MYNN (1.2)	UIMC1 (1.2)	OBFC1 (1.1)	SALL1 (1.1)	ENSG00000184378 (1.0)
MP:0000351	increased cell proliferation	0.08	0.900598	CD44 (2.0)	SH3PXD2A (1.9)	SLC38A1 (1.8)	TERT (1.7)	NPAT (1.7)	SULT1B1 (1.6)	GREB1 (1.5)	LNX1 (1.5)	SLC38A2 (1.4)	LRRC31 (1.2)
GO:0003707	steroid hormone receptor activity	0.08	0.900598	GREB1 (3.2)	LRRC31 (2.4)	SIRT3 (2.4)	TNRC6B (2.4)	FOXO1 (2.0)	SLC25A15 (1.8)	TERT (1.4)	WT1-AS (1.2)	SALL1 (1.1)	SULT1B1 (1.0)
GO:0030330	DNA damage response, signal transduction by p53 class mediator	0.08	0.900598	ENSG00000228397 (3.0)	PSMD13 (2.7)	MYNN (1.6)	LINC00339 (1.4)	DMRT1 (1.4)	CDC42 (1.4)	NPAT (1.3)	MRPS31 (1.2)	ZNF346 (1.0)	FIP1L1 (1.0)
ENSG00000204256	BRD2 PPI subnetwork	0.08	0.900598	DMRT1 (2.4)	SCGB1C1 (2.2)	UIMC1 (1.8)	ZNF346 (1.6)	FIP1L1 (1.5)	MRPS31 (1.3)	ENSG00000228397 (1.2)	ATM (1.0)	CDC42 (0.9)	COG6 (0.9)
ENSG00000215077	BRD2 PPI subnetwork	0.08	0.900598	DMRT1 (2.4)	SCGB1C1 (2.2)	UIMC1 (1.8)	ZNF346 (1.6)	FIP1L1 (1.5)	MRPS31 (1.3)	ENSG00000228397 (1.2)	ATM (1.0)	CDC42 (0.9)	COG6 (0.9)
ENSG00000112526	ENSG00000112526 PPI subnetwork	0.08	0.900598	DMRT1 (2.4)	SCGB1C1 (2.2)	UIMC1 (1.8)	ZNF346 (1.6)	FIP1L1 (1.5)	MRPS31 (1.3)	ENSG00000228397 (1.2)	ATM (1.0)	CDC42 (0.9)	COG6 (0.9)
ENSG00000172301	C17orf79 PPI subnetwork	0.08	0.900598	CUL5 (2.6)	ENSG00000228397 (2.3)	DMRT1 (2.0)	BET1L (1.8)	ENSG00000258096 (1.2)	SCGB1C1 (1.2)	RIC8A (1.0)	CDC42 (1.0)	PSMD13 (1.0)	GREB1 (0.9)
GO:0006891	intra-Golgi vesicle-mediated transport	0.08	0.900598	COG6 (7.1)	BET1L (3.8)	ZNF346 (2.4)	CUL5 (2.3)	MYNN (2.1)	UIMC1 (1.8)	ENSG00000258096 (1.6)	ATM (1.4)	LRRC31 (1.3)	SYNE1 (1.2)
ENSG00000006468	ETV1 PPI subnetwork	0.08	0.900598	ENSG00000226403 (2.8)	TNRC6B (2.4)	ENSG00000228397 (2.1)	FOXO1 (1.3)	CDC42-IT1 (1.2)	HK3 (1.1)	COG6 (1.1)	BET1L (1.1)	DMRT1 (0.9)	MYNN (0.9)
GO:0006555	methionine metabolic process	0.08	0.900598	ENSG00000184378 (1.8)	ENSG00000226403 (1.7)	KDELC2 (1.7)	SIRT3 (1.4)	OBFC1 (1.4)	CUL5 (1.4)	COG6 (1.2)	ZNF346 (1.2)	LNX1 (1.1)	SCGB1C1 (1.1)
MP:0005146	decreased circulating VLDL cholesterol level	0.08	0.900598	SLC25A15 (3.8)	SULT1B1 (2.5)	LNX1 (2.3)	ENSG00000258096 (1.4)	GREB1 (1.4)	SIRT3 (1.3)	DMRT1 (1.1)	FOXO1 (1.0)	KANK1 (1.0)	MRPS31 (0.8)
GO:0016289	CoA hydrolase activity	0.08	0.900598	DMRT1 (1.8)	C11orf65 (1.8)	SULT1B1 (1.8)	MRPS31 (1.7)	SIRT3 (1.7)	LRRC31 (1.7)	ENSG00000184378 (1.6)	ENSG00000258096 (1.4)	SLC25A15 (1.3)	ACAT1 (1.3)
MP:0000239	absent common myeloid progenitor cells	0.08	0.900598	WT1-AS (2.7)	KANK1 (2.1)	SYNE1 (2.0)	TNRC6B (1.5)	HK3 (1.3)	SCGB1C1 (1.3)	WNT4 (1.2)	CDC42-IT1 (1.1)	SLC38A1 (1.0)	KDELC2 (0.9)
ENSG00000177200	CHD9 PPI subnetwork	0.08	0.900598	CUL5 (3.3)	MRPS31 (2.5)	NPAT (2.3)	MYNN (1.8)	FIP1L1 (1.7)	UIMC1 (1.5)	BET1L (1.2)	ODF3 (1.1)	RIC8A (0.9)	SLC25A15 (0.8)
MP:0000208	decreased hematocrit	0.08	0.900598	CD44 (2.3)	SLC25A15 (1.6)	SALL1 (1.5)	TNRC6B (1.3)	FOXO1 (1.2)	ENSG00000184378 (1.2)	ENSG00000258096 (1.2)	SYNE1 (1.0)	SCGB1C1 (0.9)	LNX1 (0.8)
GO:0042800	histone methyltransferase activity (H3-K4 specific)	0.08	0.900598	TNRC6B (3.5)	DMRT1 (3.1)	ATM (2.9)	NPAT (1.9)	UIMC1 (1.9)	ZNF346 (1.7)	FOXO1 (1.5)	WT1-AS (1.2)	SLC38A2 (1.2)	COG6 (0.8)
MP:0004808	abnormal hematopoietic stem cell morphology	0.08	0.900598	TNRC6B (2.7)	FOXO1 (2.0)	LNX1 (2.0)	ATM (1.8)	CUL5 (1.8)	LRRC34 (1.7)	LRRC31 (1.7)	TERT (1.6)	DMRT1 (1.5)	MYNN (1.4)
ENSG00000133794	ARNTL PPI subnetwork	0.08	0.900598	FOXO1 (2.8)	SLC38A2 (2.3)	MYNN (2.1)	TNRC6B (2.0)	LNX1 (1.6)	ENSG00000228397 (1.3)	COG6 (1.3)	LRRC34 (1.2)	SLC38A1 (1.1)	FIP1L1 (0.9)
REACTOME_THE_NLRP3_INFLAMMASOME	REACTOME_THE_NLRP3_INFLAMMASOME	0.08	0.900598	KDELC2 (2.7)	CD44 (2.3)	HK3 (2.3)	LRRC31 (2.2)	ATM (1.7)	MRPS31 (1.5)	TERT (1.3)	CDC42 (1.2)	KANK1 (1.1)	ACAT1 (1.1)
MP:0000352	decreased cell proliferation	0.08	0.900598	NPAT (3.0)	SLC38A2 (2.9)	TERT (2.0)	UIMC1 (1.9)	MRPS31 (1.8)	CDC42-IT1 (1.6)	CUL5 (1.5)	FIP1L1 (1.3)	CD44 (1.3)	ENSG00000228397 (1.0)
GO:0043627	response to estrogen stimulus	0.08	0.900598	ENSG00000258096 (3.1)	LNX1 (2.2)	GREB1 (1.9)	WNT4 (1.9)	ODF3 (1.8)	DMRT1 (1.3)	LINC00339 (1.3)	SH3PXD2A (1.1)	BET1L (1.0)	WT1-AS (1.0)
ENSG00000080986	NDC80 PPI subnetwork	0.08	0.900598	NPAT (1.9)	KDELC2 (1.4)	ATM (1.3)	COG6 (1.3)	ACAT1 (1.2)	KANK1 (1.0)	PSMD13 (0.9)	ZNF346 (0.9)	MRPS31 (0.9)	SLC38A2 (0.9)
MP:0003446	renal hypoplasia	0.08	0.900598	SALL1 (4.6)	ENSG00000228397 (2.0)	SLC38A1 (1.8)	SH3PXD2A (1.7)	WNT4 (1.6)	WT1-AS (1.6)	LRRC34 (1.4)	BET1L (1.3)	SCGB1C1 (1.1)	KANK1 (1.1)
GO:0048199	vesicle targeting, to, from or within Golgi	0.08	0.900598	COG6 (6.5)	BET1L (6.2)	ENSG00000258096 (2.4)	RIC8A (1.9)	MYNN (1.3)	ACAT1 (1.2)	C11orf65 (1.0)	PSMD13 (0.9)	KDELC2 (0.9)	ATM (0.8)
GO:0016835	carbon-oxygen lyase activity	0.08	0.900598	ACAT1 (3.9)	SIRT3 (2.3)	MRPS31 (1.7)	ATM (1.3)	SALL1 (1.3)	DMRT1 (1.2)	SLC25A15 (1.2)	KANK1 (1.1)	ENSG00000226403 (1.1)	OBFC1 (1.0)
MP:0000662	abnormal branching of the mammary ductal tree	0.08	0.900598	GREB1 (6.0)	CD44 (3.0)	FOXO1 (2.0)	KANK1 (1.3)	ATM (1.3)	CUL5 (1.2)	TNRC6B (1.2)	SLC38A2 (1.1)	DMRT1 (1.1)	LNX1 (1.1)
MP:0005309	increased circulating ammonia level	0.08	0.900598	SLC25A15 (4.4)	SULT1B1 (3.7)	HK3 (2.2)	ACAT1 (1.6)	WT1-AS (1.5)	ENSG00000228397 (1.3)	ENSG00000258096 (1.3)	ENSG00000226403 (1.0)	ODF3 (1.0)	LNX1 (0.9)
GO:0030983	mismatched DNA binding	0.08	0.900598	ATM (4.3)	SCGB1C1 (2.9)	UIMC1 (2.5)	NPAT (2.0)	MRPS31 (1.5)	ZNF346 (1.5)	ENSG00000258096 (1.4)	DMRT1 (1.3)	ENSG00000228397 (1.3)	FIP1L1 (1.2)
ENSG00000137462	TLR2 PPI subnetwork	0.08	0.900598	RIC8A (4.1)	BET1L (3.0)	CD44 (2.6)	SIRT3 (2.0)	ENSG00000258096 (1.9)	SULT1B1 (1.8)	PSMD13 (1.7)	HK3 (1.4)	KDELC2 (1.2)	CDC42 (1.0)
ENSG00000048828	FAM120A PPI subnetwork	0.08	0.900598	ENSG00000184378 (3.9)	RIC8A (2.8)	CD44 (2.6)	PSMD13 (2.3)	CDC42-IT1 (1.4)	GREB1 (1.3)	CDC42 (1.2)	SIRT3 (1.1)	SLC38A2 (1.0)	ENSG00000226403 (1.0)
GO:0006007	glucose catabolic process	0.08	0.900598	C11orf65 (3.3)	ODF3 (1.9)	SIRT3 (1.6)	OBFC1 (1.5)	LRRC34 (1.3)	LNX1 (1.3)	COG6 (1.2)	SLC25A15 (1.0)	LRRC31 (0.9)	ACAT1 (0.8)
ENSG00000115461	IGFBP5 PPI subnetwork	0.08	0.900598	WT1-AS (2.4)	WNT4 (2.4)	SCGB1C1 (1.9)	SH3PXD2A (1.5)	LRRC34 (1.4)	GREB1 (1.2)	COG6 (1.2)	RIC8A (1.0)	DMRT1 (0.9)	LRRC31 (0.8)
MP:0000266	abnormal heart morphology	0.08	0.900598	KANK1 (1.8)	ENSG00000258096 (1.4)	TNRC6B (1.3)	ENSG00000228397 (1.3)	SALL1 (1.2)	CD44 (1.2)	CUL5 (1.1)	BET1L (0.9)	ATM (0.8)	ENSG00000226403 (0.7)
KEGG_DORSO_VENTRAL_AXIS_FORMATION	KEGG_DORSO_VENTRAL_AXIS_FORMATION	0.08	0.900598	C11orf65 (3.3)	DMRT1 (2.8)	WT1-AS (2.0)	CDC42-IT1 (1.9)	ENSG00000226403 (1.8)	LRRC34 (1.4)	ODF3 (1.3)	CDC42 (1.3)	TNRC6B (1.1)	TERT (1.0)
ENSG00000136156	ITM2B PPI subnetwork	0.08	0.900598	CD44 (2.5)	SLC38A1 (2.2)	HK3 (2.1)	SULT1B1 (2.0)	MYNN (1.7)	KANK1 (1.4)	ENSG00000226403 (1.3)	SLC38A2 (1.2)	FOXO1 (1.2)	CDC42 (1.2)
ENSG00000163599	CTLA4 PPI subnetwork	0.08	0.900598	FOXO1 (2.9)	WT1-AS (2.1)	GREB1 (1.6)	CD44 (1.5)	LRRC31 (1.3)	MYNN (1.2)	ATM (1.2)	SLC38A1 (1.0)	COG6 (1.0)	KANK1 (0.9)
ENSG00000188170	ENSG00000188170 PPI subnetwork	0.08	0.900598	SALL1 (2.0)	ACAT1 (1.7)	OBFC1 (1.4)	KANK1 (1.4)	ZNF346 (1.3)	ENSG00000226403 (1.2)	SLC25A15 (1.2)	SCGB1C1 (1.1)	CD44 (1.0)	GREB1 (0.9)
MP:0008782	increased B cell apoptosis	0.08	0.900598	TERT (2.8)	SLC38A1 (2.6)	LRRC34 (2.2)	KANK1 (2.0)	WT1-AS (1.8)	FOXO1 (1.7)	GREB1 (1.2)	LNX1 (1.2)	MRPS31 (1.2)	MYNN (1.1)
MP:0001155	arrest of spermatogenesis	0.08	0.900598	DMRT1 (5.4)	C11orf65 (3.2)	ODF3 (2.7)	GREB1 (2.3)	LRRC34 (2.1)	ENSG00000226403 (1.8)	SALL1 (1.7)	UIMC1 (1.1)	NPAT (1.1)	SLC25A15 (0.9)
KEGG_METABOLISM_OF_XENOBIOTICS_BY_CYTOCHROME_P450	KEGG_METABOLISM_OF_XENOBIOTICS_BY_CYTOCHROME_P450	0.08	0.900598	SULT1B1 (3.8)	EXPH5 (2.7)	SLC25A15 (2.3)	OBFC1 (1.7)	ODF3 (1.7)	LRRC31 (1.4)	LRRC34 (1.2)	LINC00339 (1.2)	LNX1 (1.2)	C11orf65 (1.2)
GO:0016500	protein-hormone receptor activity	0.08	0.900598	GREB1 (3.9)	SALL1 (3.1)	LRRC31 (2.1)	KANK1 (1.5)	DMRT1 (1.5)	FOXO1 (1.4)	WT1-AS (1.3)	TERT (1.2)	EXPH5 (1.2)	LNX1 (0.9)
GO:0010332	response to gamma radiation	0.08	0.900598	ATM (2.0)	NPAT (1.9)	LINC00339 (1.8)	MRPS31 (1.6)	C11orf65 (1.5)	UIMC1 (1.3)	CUL5 (1.0)	SLC25A15 (0.9)	TERT (0.8)	ENSG00000258096 (0.8)
MP:0005425	increased macrophage cell number	0.08	0.900598	WT1-AS (2.5)	CD44 (2.4)	SYNE1 (1.6)	WNT4 (1.5)	GREB1 (1.5)	FOXO1 (1.4)	ENSG00000184378 (1.3)	EXPH5 (1.0)	TNRC6B (0.9)	LRRC34 (0.8)
MP:0008657	increased interleukin-1 beta secretion	0.08	0.900598	CDC42-IT1 (3.0)	SIRT3 (2.0)	LINC00339 (1.9)	GREB1 (1.9)	HK3 (1.6)	CD44 (1.4)	SLC38A2 (1.3)	KDELC2 (1.2)	WT1-AS (1.2)	KANK1 (1.1)
ENSG00000173702	MUC13 PPI subnetwork	0.08	0.900598	SULT1B1 (4.5)	SYNE1 (1.5)	CD44 (1.3)	NPAT (1.3)	KANK1 (1.2)	SCGB1C1 (1.2)	LRRC31 (1.1)	OBFC1 (1.1)	LNX1 (1.0)	EXPH5 (0.9)
GO:0007565	female pregnancy	0.08	0.900598	GREB1 (4.1)	ENSG00000226403 (2.8)	ENSG00000184378 (2.4)	EXPH5 (1.7)	ENSG00000228397 (1.7)	ENSG00000258096 (1.7)	FOXO1 (1.3)	LINC00339 (1.2)	LNX1 (1.2)	WNT4 (1.1)
ENSG00000160293	VAV2 PPI subnetwork	0.08	0.900598	RIC8A (1.8)	WT1-AS (1.8)	SALL1 (1.4)	SLC38A2 (1.4)	FOXO1 (1.4)	SLC38A1 (1.3)	OBFC1 (1.2)	CDC42 (1.1)	CDC42-IT1 (1.0)	ENSG00000258096 (1.0)
MP:0003718	maternal effect	0.08	0.900598	SLC25A15 (2.5)	ENSG00000226403 (1.8)	SULT1B1 (1.8)	ENSG00000228397 (1.8)	WNT4 (1.5)	LINC00339 (1.4)	KANK1 (1.3)	C11orf65 (1.2)	ZNF346 (1.1)	DMRT1 (1.0)
GO:0000302	response to reactive oxygen species	0.08	0.900598	ENSG00000226403 (3.8)	HK3 (2.0)	KANK1 (2.0)	WT1-AS (1.1)	SLC38A2 (1.0)	ENSG00000258096 (0.9)	SYNE1 (0.9)	ACAT1 (0.9)	SH3PXD2A (0.8)	SALL1 (0.7)
GO:0060420	regulation of heart growth	0.08	0.900598	WT1-AS (5.0)	ENSG00000228397 (2.8)	ENSG00000258096 (2.1)	ENSG00000226403 (1.5)	KANK1 (1.4)	GREB1 (1.3)	LINC00339 (1.2)	CDC42-IT1 (0.9)	SLC25A15 (0.9)	ODF3 (0.8)
ENSG00000096060	FKBP5 PPI subnetwork	0.08	0.900598	GREB1 (5.2)	WT1-AS (2.0)	ATM (1.6)	TNRC6B (1.2)	WNT4 (1.2)	LRRC34 (1.2)	LNX1 (1.1)	CD44 (1.1)	FOXO1 (1.0)	ZNF346 (1.0)
ENSG00000138378	STAT4 PPI subnetwork	0.08	0.900598	TNRC6B (2.8)	SULT1B1 (2.3)	ENSG00000184378 (2.1)	FOXO1 (1.4)	HK3 (1.2)	UIMC1 (1.0)	CDC42 (0.9)	OBFC1 (0.9)	WNT4 (0.8)	RIC8A (0.7)
REACTOME_S_PHASE	REACTOME_S_PHASE	0.08	0.900598	PSMD13 (3.9)	NPAT (2.8)	MRPS31 (1.9)	CDC42 (1.3)	KDELC2 (1.2)	ZNF346 (1.2)	OBFC1 (1.1)	ENSG00000228397 (1.1)	LINC00339 (0.9)	MYNN (0.9)
GO:0006979	response to oxidative stress	0.08	0.900598	ENSG00000226403 (2.4)	ACAT1 (1.6)	SLC38A2 (1.5)	HK3 (1.4)	KANK1 (1.3)	TERT (1.1)	SIRT3 (1.0)	CUL5 (1.0)	SLC38A1 (1.0)	EXPH5 (0.8)
ENSG00000112312	GMNN PPI subnetwork	0.08	0.900598	SALL1 (2.8)	NPAT (2.1)	ENSG00000228397 (1.8)	SLC38A1 (1.6)	ENSG00000226403 (1.4)	LRRC34 (1.4)	ENSG00000184378 (1.3)	KANK1 (1.0)	SLC38A2 (0.9)	WT1-AS (0.9)
MP:0008642	decreased circulating interleukin-1 beta level	0.08	0.900598	KDELC2 (2.5)	ENSG00000184378 (2.4)	TERT (2.3)	CD44 (2.0)	LNX1 (1.8)	LRRC31 (1.4)	KANK1 (1.2)	ENSG00000226403 (1.1)	MYNN (1.1)	ATM (1.0)
GO:0000989	transcription factor binding transcription factor activity	0.08	0.900598	TNRC6B (3.0)	FIP1L1 (2.7)	UIMC1 (2.4)	SLC38A2 (2.2)	MYNN (1.9)	ZNF346 (1.7)	MRPS31 (1.5)	FOXO1 (1.5)	NPAT (1.0)	WNT4 (0.9)
GO:0001704	formation of primary germ layer	0.08	0.900598	KANK1 (2.2)	SCGB1C1 (1.9)	EXPH5 (1.8)	OBFC1 (1.7)	ENSG00000228397 (1.6)	ENSG00000258096 (1.5)	SALL1 (1.5)	GREB1 (1.4)	WT1-AS (1.0)	WNT4 (0.9)
REACTOME_INTEGRIN_CELL_SURFACE_INTERACTIONS	REACTOME_INTEGRIN_CELL_SURFACE_INTERACTIONS	0.08	0.900598	KANK1 (2.3)	SYNE1 (1.8)	SH3PXD2A (1.5)	CD44 (1.5)	ENSG00000226403 (1.3)	SALL1 (1.2)	HK3 (1.1)	WNT4 (1.1)	TERT (1.0)	C11orf65 (0.9)
MP:0008215	decreased immature B cell number	0.08	0.900598	TERT (2.6)	FOXO1 (2.3)	SLC38A1 (1.8)	ODF3 (1.6)	C11orf65 (1.4)	CD44 (1.3)	HK3 (1.1)	ENSG00000228397 (1.1)	FIP1L1 (1.0)	WT1-AS (0.9)
REACTOME_POST:ELONGATION_PROCESSING_OF_INTRONLESS_PRE:MRNA	REACTOME_POST:ELONGATION_PROCESSING_OF_INTRONLESS_PRE:MRNA	0.08	0.900598	MYNN (2.2)	RIC8A (2.0)	UIMC1 (1.6)	NPAT (1.5)	ENSG00000184378 (1.3)	ATM (1.3)	LRRC31 (1.3)	GREB1 (1.2)	ENSG00000258096 (0.9)	KDELC2 (0.8)
REACTOME_PROCESSING_OF_CAPPED_INTRONLESS_PRE:MRNA	REACTOME_PROCESSING_OF_CAPPED_INTRONLESS_PRE:MRNA	0.08	0.900598	MYNN (2.2)	RIC8A (2.0)	UIMC1 (1.6)	NPAT (1.5)	ENSG00000184378 (1.3)	ATM (1.3)	LRRC31 (1.3)	GREB1 (1.2)	ENSG00000258096 (0.9)	KDELC2 (0.8)
GO:0035270	endocrine system development	0.08	0.900598	WNT4 (2.3)	WT1-AS (2.2)	SALL1 (1.8)	LRRC31 (1.5)	ENSG00000226403 (1.3)	SULT1B1 (1.1)	SLC38A1 (1.1)	DMRT1 (0.9)	TERT (0.7)	CDC42-IT1 (0.6)
ENSG00000122140	MRPS2 PPI subnetwork	0.08	0.900598	MRPS31 (3.1)	SLC25A15 (2.6)	ACAT1 (1.6)	CUL5 (1.1)	SYNE1 (1.0)	LINC00339 (1.0)	MYNN (1.0)	SIRT3 (0.9)	ATM (0.9)	PSMD13 (0.9)
GO:0004221	ubiquitin thiolesterase activity	0.08	0.900598	CUL5 (3.4)	LNX1 (2.2)	NPAT (1.9)	UIMC1 (1.8)	FIP1L1 (1.6)	CDC42 (1.5)	SIRT3 (1.3)	MYNN (1.3)	WT1-AS (1.2)	ENSG00000226403 (1.1)
KEGG_ETHER_LIPID_METABOLISM	KEGG_ETHER_LIPID_METABOLISM	0.08	0.900598	KANK1 (2.5)	LINC00339 (2.2)	KDELC2 (2.0)	LNX1 (1.6)	CDC42-IT1 (1.5)	TNRC6B (1.4)	OBFC1 (1.4)	WNT4 (1.3)	ACAT1 (1.2)	ENSG00000258096 (1.1)
MP:0000233	abnormal blood flow velocity	0.08	0.900598	HK3 (2.9)	ENSG00000228397 (2.2)	SULT1B1 (2.0)	KANK1 (1.5)	SYNE1 (1.4)	WT1-AS (1.3)	SALL1 (1.3)	COG6 (1.2)	SLC38A2 (1.0)	MYNN (0.9)
ENSG00000114982	KANSL3 PPI subnetwork	0.08	0.900598	BET1L (2.5)	MRPS31 (2.0)	NPAT (1.9)	RIC8A (1.8)	MYNN (1.7)	COG6 (1.6)	UIMC1 (1.5)	ZNF346 (1.5)	CUL5 (1.2)	LINC00339 (1.1)
ENSG00000188130	MAPK12 PPI subnetwork	0.08	0.900598	EXPH5 (1.5)	SIRT3 (1.4)	CDC42-IT1 (1.3)	TNRC6B (1.3)	SYNE1 (1.2)	SLC38A2 (1.0)	CDC42 (1.0)	LINC00339 (0.9)	ENSG00000228397 (0.9)	OBFC1 (0.9)
MP:0000830	abnormal diencephalon morphology	0.08	0.900598	SALL1 (3.7)	GREB1 (2.4)	SH3PXD2A (2.0)	FOXO1 (1.9)	EXPH5 (1.6)	KANK1 (1.6)	LRRC34 (1.6)	TNRC6B (1.5)	SYNE1 (1.4)	OBFC1 (1.1)
ENSG00000137947	GTF2B PPI subnetwork	0.08	0.900598	UIMC1 (2.5)	BET1L (2.5)	MRPS31 (2.4)	PSMD13 (2.2)	FIP1L1 (2.0)	CDC42-IT1 (1.8)	RIC8A (1.6)	DMRT1 (1.3)	SIRT3 (1.2)	OBFC1 (1.2)
GO:0051248	negative regulation of protein metabolic process	0.08	0.900598	PSMD13 (2.2)	CDC42 (1.9)	CDC42-IT1 (1.7)	BET1L (1.7)	KANK1 (1.6)	MRPS31 (1.4)	ENSG00000184378 (1.1)	CD44 (1.0)	ENSG00000228397 (1.0)	WT1-AS (0.9)
ENSG00000168148	HIST3H3 PPI subnetwork	0.09	0.900598	UIMC1 (2.7)	NPAT (2.5)	ZNF346 (2.3)	DMRT1 (2.2)	TNRC6B (2.1)	ENSG00000228397 (1.6)	FIP1L1 (1.5)	ATM (1.4)	ENSG00000226403 (1.2)	SLC38A1 (1.1)
ENSG00000115325	DOK1 PPI subnetwork	0.09	0.900598	HK3 (3.1)	SLC38A1 (2.7)	MYNN (1.9)	FIP1L1 (1.8)	TNRC6B (1.4)	ODF3 (1.3)	COG6 (1.2)	LNX1 (1.1)	ATM (1.0)	SLC38A2 (1.0)
MP:0008826	abnormal splenic cell ratio	0.09	0.900598	CD44 (2.4)	CUL5 (1.3)	ENSG00000228397 (1.3)	SLC38A1 (1.2)	ENSG00000258096 (1.1)	WT1-AS (1.0)	MYNN (1.0)	DMRT1 (1.0)	TNRC6B (0.8)	NPAT (0.7)
ENSG00000215754	ENSG00000215754 PPI subnetwork	0.09	0.900598	SLC25A15 (3.3)	GREB1 (2.4)	LNX1 (2.4)	WNT4 (2.3)	TNRC6B (1.6)	SALL1 (1.4)	SLC38A1 (1.3)	CUL5 (1.0)	ODF3 (0.9)	NPAT (0.8)
GO:0051301	cell division	0.09	0.900598	NPAT (2.7)	KDELC2 (2.4)	LINC00339 (1.9)	CDC42-IT1 (1.8)	FIP1L1 (1.8)	MYNN (1.8)	OBFC1 (1.8)	ATM (1.6)	ZNF346 (1.6)	COG6 (1.5)
MP:0001005	abnormal retinal rod cell morphology	0.09	0.900598	LINC00339 (2.1)	SULT1B1 (1.7)	CUL5 (1.6)	ENSG00000226403 (1.5)	LRRC34 (1.3)	ODF3 (1.0)	TNRC6B (1.0)	CDC42-IT1 (0.9)	SYNE1 (0.9)	ENSG00000258096 (0.9)
GO:0070403	NAD+ binding	0.09	0.900598	ACAT1 (3.2)	RIC8A (3.2)	SIRT3 (2.7)	LINC00339 (2.2)	SULT1B1 (2.1)	LRRC34 (1.7)	TERT (1.7)	OBFC1 (1.6)	SLC25A15 (1.6)	KANK1 (1.6)
ENSG00000196363	WDR5 PPI subnetwork	0.09	0.900598	UIMC1 (2.9)	NPAT (2.4)	LINC00339 (2.3)	FIP1L1 (2.2)	TNRC6B (2.1)	MYNN (1.7)	DMRT1 (1.4)	ZNF346 (1.1)	MRPS31 (1.0)	ENSG00000228397 (0.9)
MP:0006108	abnormal hindbrain development	0.09	0.900598	SLC25A15 (2.5)	LRRC34 (2.4)	SALL1 (2.3)	SCGB1C1 (2.1)	ENSG00000226403 (1.8)	ODF3 (1.8)	SULT1B1 (1.6)	C11orf65 (1.6)	CDC42 (1.2)	CD44 (1.0)
ENSG00000058729	RIOK2 PPI subnetwork	0.09	0.900598	FIP1L1 (3.0)	ATM (1.7)	KANK1 (1.6)	ENSG00000226403 (1.5)	MRPS31 (1.5)	TERT (1.4)	NPAT (1.3)	FOXO1 (1.1)	CD44 (1.0)	OBFC1 (1.0)
GO:0071826	ribonucleoprotein complex subunit organization	0.09	0.900598	TERT (2.1)	MRPS31 (2.0)	CUL5 (1.8)	ATM (1.8)	ZNF346 (1.8)	UIMC1 (1.7)	FIP1L1 (1.7)	LRRC34 (1.3)	RIC8A (1.2)	MYNN (1.2)
GO:0006266	DNA ligation	0.09	0.900598	C11orf65 (2.6)	COG6 (2.4)	ENSG00000228397 (2.3)	OBFC1 (2.2)	MRPS31 (2.0)	ODF3 (2.0)	ENSG00000226403 (1.9)	FIP1L1 (1.6)	KDELC2 (1.4)	SLC25A15 (1.1)
GO:0034375	high-density lipoprotein particle remodeling	0.09	0.900598	SLC25A15 (2.0)	SCGB1C1 (1.7)	LNX1 (1.6)	CDC42-IT1 (1.6)	LRRC34 (1.5)	EXPH5 (1.4)	SULT1B1 (1.4)	SIRT3 (1.2)	ENSG00000258096 (1.2)	ENSG00000228397 (1.1)
ENSG00000122884	P4HA1 PPI subnetwork	0.09	0.900598	OBFC1 (2.6)	COG6 (1.7)	ATM (1.7)	MYNN (1.6)	SLC38A2 (1.6)	SLC38A1 (1.5)	ACAT1 (1.4)	RIC8A (1.3)	PSMD13 (1.3)	SCGB1C1 (0.8)
MP:0001601	abnormal myelopoiesis	0.09	0.900598	HK3 (2.7)	LRRC34 (2.1)	SLC38A1 (1.7)	CUL5 (1.5)	TNRC6B (1.4)	ZNF346 (1.0)	TERT (1.0)	GREB1 (0.9)	WT1-AS (0.9)	CD44 (0.9)
GO:0044275	cellular carbohydrate catabolic process	0.09	0.900598	SIRT3 (2.1)	LRRC34 (1.8)	COG6 (1.8)	C11orf65 (1.7)	SLC25A15 (1.6)	ACAT1 (1.4)	OBFC1 (1.2)	LNX1 (1.2)	HK3 (1.1)	SYNE1 (1.0)
GO:0051384	response to glucocorticoid stimulus	0.09	0.900598	SULT1B1 (2.4)	ENSG00000258096 (2.1)	LNX1 (1.9)	CD44 (1.9)	C11orf65 (1.9)	ODF3 (1.8)	SCGB1C1 (1.8)	SLC25A15 (1.8)	CDC42-IT1 (1.6)	KANK1 (1.4)
GO:0009103	lipopolysaccharide biosynthetic process	0.09	0.900598	BET1L (2.0)	CDC42-IT1 (2.0)	COG6 (1.7)	SULT1B1 (1.4)	UIMC1 (1.4)	LINC00339 (1.3)	SH3PXD2A (1.2)	ENSG00000226403 (1.2)	SIRT3 (1.1)	WNT4 (1.0)
MP:0005140	decreased cardiac muscle contractility	0.09	0.900598	SYNE1 (2.3)	KANK1 (2.2)	ENSG00000226403 (1.6)	CD44 (1.3)	SIRT3 (1.0)	ENSG00000228397 (1.0)	SALL1 (0.9)	CDC42-IT1 (0.8)	SLC25A15 (0.7)	SLC38A1 (0.7)
ENSG00000014216	CAPN1 PPI subnetwork	0.09	0.900598	CD44 (2.4)	SH3PXD2A (2.1)	KDELC2 (1.3)	EXPH5 (1.3)	RIC8A (1.2)	ENSG00000226403 (1.1)	DMRT1 (1.1)	OBFC1 (1.0)	SULT1B1 (0.9)	ACAT1 (0.7)
GO:0048515	spermatid differentiation	0.09	0.900598	ODF3 (5.5)	C11orf65 (3.7)	DMRT1 (2.5)	ENSG00000184378 (1.9)	LRRC34 (1.9)	ENSG00000226403 (1.3)	UIMC1 (1.1)	ENSG00000258096 (0.9)	ZNF346 (0.9)	ATM (0.7)
REACTOME_IRAK2_MEDIATED_ACTIVATION_OF_TAK1_COMPLEX_UPON_TLR78_OR_9_STIMULATION	REACTOME_IRAK2_MEDIATED_ACTIVATION_OF_TAK1_COMPLEX_UPON_TLR78_OR_9_STIMULATION	0.09	0.900598	KANK1 (1.5)	ENSG00000184378 (1.5)	MYNN (1.5)	CDC42-IT1 (1.3)	LNX1 (1.0)	ENSG00000228397 (1.0)	ZNF346 (1.0)	BET1L (1.0)	RIC8A (0.9)	TNRC6B (0.8)
ENSG00000142273	CBLC PPI subnetwork	0.09	0.900598	C11orf65 (2.6)	FOXO1 (1.9)	HK3 (1.6)	SIRT3 (1.4)	KANK1 (1.3)	SH3PXD2A (1.0)	WT1-AS (1.0)	ENSG00000228397 (0.9)	SLC25A15 (0.9)	ENSG00000184378 (0.7)
ENSG00000123562	MORF4L2 PPI subnetwork	0.09	0.900598	MYNN (1.9)	MRPS31 (1.8)	FOXO1 (1.8)	FIP1L1 (1.6)	PSMD13 (1.4)	LINC00339 (1.3)	UIMC1 (1.3)	ODF3 (1.2)	DMRT1 (0.9)	GREB1 (0.8)
ENSG00000119041	GTF3C3 PPI subnetwork	0.09	0.900598	SCGB1C1 (2.1)	SLC25A15 (1.9)	RIC8A (1.9)	CDC42-IT1 (1.7)	SLC38A1 (1.5)	NPAT (1.4)	DMRT1 (1.3)	MRPS31 (1.2)	LINC00339 (1.2)	ODF3 (1.1)
GO:0034620	cellular response to unfolded protein	0.09	0.900598	SLC38A2 (4.0)	ENSG00000184378 (2.3)	BET1L (1.9)	KDELC2 (1.7)	MYNN (1.7)	SLC38A1 (1.5)	LINC00339 (1.1)	EXPH5 (1.0)	LNX1 (1.0)	UIMC1 (0.9)
GO:0030968	endoplasmic reticulum unfolded protein response	0.09	0.900598	SLC38A2 (4.0)	ENSG00000184378 (2.3)	BET1L (1.9)	KDELC2 (1.7)	MYNN (1.7)	SLC38A1 (1.5)	LINC00339 (1.1)	EXPH5 (1.0)	LNX1 (1.0)	UIMC1 (0.9)
GO:0007584	response to nutrient	0.09	0.900598	DMRT1 (2.6)	SLC25A15 (1.6)	WNT4 (1.6)	KANK1 (1.5)	CDC42-IT1 (1.5)	SH3PXD2A (1.5)	ENSG00000226403 (1.3)	SULT1B1 (1.1)	TNRC6B (1.0)	LINC00339 (0.9)
GO:0034368	protein-lipid complex remodeling	0.09	0.900598	CDC42-IT1 (2.6)	SLC25A15 (2.3)	ENSG00000226403 (1.8)	SIRT3 (1.8)	LRRC34 (1.6)	LNX1 (1.4)	SCGB1C1 (1.3)	LRRC31 (1.1)	UIMC1 (0.7)	SULT1B1 (0.7)
GO:0034369	plasma lipoprotein particle remodeling	0.09	0.900598	CDC42-IT1 (2.6)	SLC25A15 (2.3)	ENSG00000226403 (1.8)	SIRT3 (1.8)	LRRC34 (1.6)	LNX1 (1.4)	SCGB1C1 (1.3)	LRRC31 (1.1)	UIMC1 (0.7)	SULT1B1 (0.7)
GO:0034367	macromolecular complex remodeling	0.09	0.900598	CDC42-IT1 (2.6)	SLC25A15 (2.3)	ENSG00000226403 (1.8)	SIRT3 (1.8)	LRRC34 (1.6)	LNX1 (1.4)	SCGB1C1 (1.3)	LRRC31 (1.1)	UIMC1 (0.7)	SULT1B1 (0.7)
MP:0002672	abnormal branchial arch artery morphology	0.09	0.900598	WNT4 (2.6)	GREB1 (1.9)	ENSG00000226403 (1.3)	FOXO1 (1.2)	FIP1L1 (1.1)	HK3 (1.1)	CD44 (1.0)	DMRT1 (1.0)	MRPS31 (1.0)	CDC42-IT1 (1.0)
MP:0004966	abnormal inner cell mass proliferation	0.09	0.900598	KDELC2 (2.7)	FIP1L1 (2.3)	RIC8A (2.3)	NPAT (2.1)	PSMD13 (1.9)	MRPS31 (1.7)	KANK1 (1.6)	ATM (1.5)	CUL5 (1.1)	TERT (1.1)
GO:0045766	positive regulation of angiogenesis	0.09	0.900598	TERT (2.3)	ENSG00000228397 (2.0)	LNX1 (1.8)	SH3PXD2A (1.6)	DMRT1 (1.4)	KANK1 (0.9)	KDELC2 (0.9)	C11orf65 (0.9)	WT1-AS (0.9)	ATM (0.7)
ENSG00000125885	MCM8 PPI subnetwork	0.09	0.900598	NPAT (3.9)	OBFC1 (1.9)	KDELC2 (1.8)	ENSG00000228397 (1.3)	SLC38A2 (0.8)	MRPS31 (0.8)	ZNF346 (0.8)	ENSG00000258096 (0.8)	UIMC1 (0.7)	TERT (0.7)
GO:0060271	cilium morphogenesis	0.09	0.900598	LRRC34 (4.5)	C11orf65 (2.7)	LINC00339 (2.4)	OBFC1 (2.2)	SIRT3 (1.4)	ENSG00000228397 (1.4)	CDC42-IT1 (1.1)	KDELC2 (1.0)	ATM (0.8)	SYNE1 (0.8)
MP:0003871	abnormal myelin sheath morphology	0.09	0.900598	SLC38A2 (2.1)	SH3PXD2A (1.7)	SALL1 (1.5)	WT1-AS (1.4)	SULT1B1 (1.2)	CD44 (1.2)	SCGB1C1 (1.1)	KDELC2 (1.0)	NPAT (0.6)	C11orf65 (0.5)
ENSG00000076555	ACACB PPI subnetwork	0.09	0.900598	PSMD13 (2.9)	ACAT1 (2.8)	ENSG00000184378 (1.9)	ATM (1.7)	SYNE1 (1.3)	MRPS31 (1.3)	DMRT1 (1.2)	COG6 (1.1)	RIC8A (1.0)	SCGB1C1 (0.9)
ENSG00000075089	ACTR6 PPI subnetwork	0.09	0.900598	CDC42 (2.7)	MYNN (2.1)	PSMD13 (1.9)	WT1-AS (1.8)	FIP1L1 (1.7)	MRPS31 (1.7)	UIMC1 (1.6)	CUL5 (1.3)	LINC00339 (1.2)	SLC38A2 (1.1)
ENSG00000106399	RPA3 PPI subnetwork	0.09	0.900598	NPAT (3.8)	OBFC1 (2.6)	KDELC2 (2.0)	UIMC1 (1.9)	MRPS31 (1.9)	ZNF346 (1.8)	ATM (1.6)	MYNN (1.6)	LINC00339 (1.4)	RIC8A (1.2)
ENSG00000196419	XRCC6 PPI subnetwork	0.09	0.900598	SLC38A2 (1.9)	FIP1L1 (1.5)	TNRC6B (1.5)	OBFC1 (1.5)	NPAT (1.5)	ATM (1.4)	SLC38A1 (1.1)	FOXO1 (1.0)	CDC42-IT1 (1.0)	MRPS31 (0.9)
ENSG00000149257	SERPINH1 PPI subnetwork	0.09	0.900598	SCGB1C1 (2.3)	KANK1 (2.2)	ENSG00000226403 (1.9)	EXPH5 (1.8)	SULT1B1 (1.7)	RIC8A (1.5)	KDELC2 (1.4)	OBFC1 (1.2)	TERT (1.0)	SLC38A2 (0.9)
MP:0001156	abnormal spermatogenesis	0.09	0.900598	DMRT1 (6.5)	GREB1 (2.6)	ODF3 (2.4)	LRRC34 (2.3)	FOXO1 (2.2)	C11orf65 (1.7)	SALL1 (1.6)	UIMC1 (1.6)	WT1-AS (1.6)	ENSG00000226403 (1.4)
ENSG00000186153	WWOX PPI subnetwork	0.09	0.900598	FIP1L1 (2.4)	CDC42-IT1 (1.9)	TNRC6B (1.8)	COG6 (1.6)	FOXO1 (1.4)	TERT (1.3)	CUL5 (1.2)	LNX1 (1.1)	SALL1 (1.0)	ODF3 (0.6)
ENSG00000185130	HIST1H2BL PPI subnetwork	0.09	0.900598	SCGB1C1 (2.4)	ENSG00000228397 (1.9)	DMRT1 (1.7)	FIP1L1 (1.6)	CUL5 (1.5)	ATM (1.4)	ENSG00000258096 (1.4)	TNRC6B (1.3)	UIMC1 (1.2)	KDELC2 (1.2)
GO:0016604	nuclear body	0.09	0.900598	FIP1L1 (3.7)	UIMC1 (2.9)	NPAT (2.8)	MYNN (2.5)	CUL5 (2.2)	MRPS31 (2.0)	TNRC6B (1.7)	FOXO1 (1.6)	SLC38A2 (1.3)	WT1-AS (1.2)
ENSG00000171557	FGG PPI subnetwork	0.09	0.900598	HK3 (3.5)	SCGB1C1 (2.6)	GREB1 (1.6)	CD44 (1.2)	DMRT1 (1.1)	ENSG00000258096 (1.0)	SYNE1 (0.8)	WNT4 (0.8)	WT1-AS (0.5)	CUL5 (0.4)
ENSG00000185214	ENSG00000185214 PPI subnetwork	0.09	0.900598	CUL5 (4.0)	LINC00339 (2.8)	MYNN (2.7)	SLC38A2 (2.0)	ZNF346 (1.9)	ATM (1.8)	UIMC1 (1.8)	NPAT (1.6)	TNRC6B (1.2)	FIP1L1 (1.2)
GO:0000988	protein binding transcription factor activity	0.09	0.900598	TNRC6B (2.9)	FIP1L1 (2.7)	UIMC1 (2.3)	SLC38A2 (2.1)	MYNN (1.8)	FOXO1 (1.6)	ZNF346 (1.5)	MRPS31 (1.4)	NPAT (1.1)	WNT4 (0.9)
ENSG00000042980	ADAM28 PPI subnetwork	0.09	0.900598	NPAT (1.6)	EXPH5 (1.6)	UIMC1 (1.6)	COG6 (1.5)	TNRC6B (1.5)	LRRC31 (1.4)	ATM (1.4)	SYNE1 (1.4)	CUL5 (1.3)	HK3 (1.2)
MP:0005297	spina bifida occulta	0.09	0.900598	SULT1B1 (2.6)	ZNF346 (2.4)	SYNE1 (2.3)	ENSG00000258096 (1.2)	SALL1 (1.2)	ATM (0.8)	TERT (0.8)	ENSG00000226403 (0.8)	LRRC34 (0.8)	WT1-AS (0.7)
GO:0032391	photoreceptor connecting cilium	0.09	0.900598	LRRC34 (2.9)	ODF3 (2.0)	SIRT3 (1.9)	OBFC1 (1.8)	C11orf65 (1.6)	ENSG00000226403 (1.4)	SYNE1 (1.2)	MRPS31 (1.2)	SCGB1C1 (1.1)	TERT (1.0)
GO:0030521	androgen receptor signaling pathway	0.09	0.900598	TNRC6B (2.3)	GREB1 (2.2)	NPAT (1.5)	CDC42-IT1 (1.5)	LINC00339 (1.4)	FIP1L1 (1.4)	CUL5 (1.3)	OBFC1 (1.1)	MRPS31 (0.9)	COG6 (0.8)
GO:0007286	spermatid development	0.09	0.900598	ODF3 (5.6)	C11orf65 (3.9)	DMRT1 (2.4)	ENSG00000184378 (2.1)	LRRC34 (1.9)	ENSG00000258096 (1.2)	ENSG00000226403 (1.1)	UIMC1 (1.0)	ZNF346 (1.0)	SIRT3 (0.8)
ENSG00000167085	PHB PPI subnetwork	0.09	0.900598	KDELC2 (2.6)	PSMD13 (2.0)	SCGB1C1 (1.9)	KANK1 (1.9)	SLC38A1 (1.8)	CD44 (1.7)	NPAT (1.4)	ACAT1 (1.4)	ENSG00000228397 (1.2)	CDC42-IT1 (1.1)
ENSG00000136383	ALPK3 PPI subnetwork	0.09	0.900598	UIMC1 (2.0)	NPAT (1.9)	TNRC6B (1.7)	SYNE1 (1.5)	SLC38A2 (1.4)	COG6 (1.3)	EXPH5 (1.2)	HK3 (1.2)	ATM (1.2)	LRRC31 (1.2)
GO:0050853	B cell receptor signaling pathway	0.09	0.900598	SLC38A1 (3.6)	TERT (2.0)	HK3 (1.8)	WT1-AS (1.7)	ENSG00000258096 (1.4)	LRRC34 (1.0)	C11orf65 (0.8)	SYNE1 (0.8)	MYNN (0.7)	COG6 (0.7)
MP:0000343	altered response to myocardial infarction	0.09	0.900598	CD44 (2.5)	KANK1 (2.4)	HK3 (2.0)	SYNE1 (1.9)	LINC00339 (1.4)	GREB1 (1.4)	BET1L (1.3)	SIRT3 (1.3)	SALL1 (1.3)	ENSG00000184378 (1.1)
ENSG00000132383	RPA1 PPI subnetwork	0.09	0.900598	NPAT (4.1)	ATM (2.6)	OBFC1 (2.2)	MRPS31 (2.0)	KDELC2 (1.9)	UIMC1 (1.7)	FIP1L1 (1.5)	TERT (1.4)	ZNF346 (1.0)	LRRC31 (1.0)
ENSG00000178409	BEND3 PPI subnetwork	0.09	0.900598	TNRC6B (3.6)	ZNF346 (1.9)	ENSG00000184378 (1.7)	SLC38A2 (1.3)	ENSG00000228397 (1.3)	SCGB1C1 (1.1)	BET1L (1.1)	GREB1 (1.0)	ATM (0.9)	LRRC34 (0.7)
ENSG00000171564	FGB PPI subnetwork	0.09	0.900598	CDC42 (2.0)	CD44 (1.4)	HK3 (1.4)	SCGB1C1 (1.2)	GREB1 (1.2)	SALL1 (1.1)	DMRT1 (1.1)	SULT1B1 (0.8)	CDC42-IT1 (0.6)	SLC38A2 (0.5)
GO:0061041	regulation of wound healing	0.09	0.900598	SCGB1C1 (3.3)	LRRC31 (1.8)	SULT1B1 (1.6)	LINC00339 (1.5)	WNT4 (1.3)	CD44 (1.3)	ENSG00000226403 (1.1)	C11orf65 (1.1)	KANK1 (0.9)	SLC25A15 (0.9)
GO:0048232	male gamete generation	0.09	0.900598	ODF3 (5.2)	DMRT1 (4.4)	C11orf65 (3.7)	ENSG00000184378 (2.1)	LRRC34 (1.8)	ENSG00000226403 (1.8)	UIMC1 (1.4)	ZNF346 (0.8)	ENSG00000258096 (0.5)	LRRC31 (0.4)
GO:0007283	spermatogenesis	0.09	0.900598	ODF3 (5.2)	DMRT1 (4.4)	C11orf65 (3.7)	ENSG00000184378 (2.1)	LRRC34 (1.8)	ENSG00000226403 (1.8)	UIMC1 (1.4)	ZNF346 (0.8)	ENSG00000258096 (0.5)	LRRC31 (0.4)
GO:0042743	hydrogen peroxide metabolic process	0.09	0.900598	HK3 (2.1)	TERT (1.3)	WT1-AS (1.3)	ENSG00000226403 (1.1)	ODF3 (1.0)	ACAT1 (1.0)	SH3PXD2A (0.9)	SALL1 (0.8)	LNX1 (0.8)	SULT1B1 (0.7)
MP:0005048	thrombosis	0.09	0.900598	CD44 (2.2)	SLC25A15 (1.9)	SULT1B1 (1.4)	SCGB1C1 (1.2)	ENSG00000226403 (1.0)	SYNE1 (0.9)	HK3 (0.8)	COG6 (0.7)	ENSG00000258096 (0.7)	C11orf65 (0.6)
MP:0002108	abnormal muscle morphology	0.09	0.900598	SH3PXD2A (3.2)	GREB1 (2.4)	EXPH5 (1.1)	LRRC31 (1.1)	SYNE1 (1.1)	WNT4 (1.1)	FOXO1 (1.0)	TNRC6B (0.9)	TERT (0.9)	ENSG00000226403 (0.7)
MP:0003993	abnormal ventral spinal root morphology	0.09	0.900598	CDC42 (1.7)	SULT1B1 (1.7)	SALL1 (1.6)	TERT (1.5)	ATM (1.4)	SYNE1 (1.4)	DMRT1 (1.2)	HK3 (1.2)	C11orf65 (1.0)	SH3PXD2A (1.0)
GO:0046546	development of primary male sexual characteristics	0.09	0.900598	DMRT1 (6.4)	WT1-AS (3.1)	ODF3 (2.8)	GREB1 (2.1)	ENSG00000228397 (1.9)	LNX1 (1.7)	KANK1 (1.6)	WNT4 (1.5)	LRRC34 (0.9)	SALL1 (0.9)
MP:0002216	abnormal seminiferous tubule morphology	0.09	0.900598	DMRT1 (5.8)	SULT1B1 (2.4)	GREB1 (2.2)	SLC38A2 (1.7)	ZNF346 (1.7)	NPAT (1.6)	LRRC34 (1.5)	KDELC2 (1.4)	ENSG00000226403 (1.3)	KANK1 (1.2)
ENSG00000131100	ATP6V1E1 PPI subnetwork	0.09	0.900598	HK3 (2.2)	PSMD13 (2.1)	TNRC6B (2.0)	COG6 (1.8)	ENSG00000184378 (1.6)	CDC42 (1.2)	GREB1 (1.2)	NPAT (0.9)	CDC42-IT1 (0.8)	SYNE1 (0.7)
REACTOME_MRNA_DECAY_BY_3_TO_5_EXORIBONUCLEASE	REACTOME_MRNA_DECAY_BY_3_TO_5_EXORIBONUCLEASE	0.09	0.900598	MRPS31 (4.5)	SLC25A15 (3.7)	LINC00339 (1.9)	NPAT (1.7)	OBFC1 (1.6)	CUL5 (1.6)	C11orf65 (1.6)	CDC42-IT1 (1.5)	FIP1L1 (1.4)	SH3PXD2A (1.4)
ENSG00000124588	NQO2 PPI subnetwork	0.09	0.900598	COG6 (2.5)	CUL5 (2.3)	NPAT (2.0)	EXPH5 (1.8)	TNRC6B (1.6)	LRRC31 (1.5)	ATM (1.4)	ODF3 (1.3)	SLC38A2 (1.3)	LNX1 (1.3)
MP:0004768	abnormal axonal transport	0.09	0.900598	ACAT1 (1.8)	ZNF346 (1.5)	CUL5 (1.5)	ATM (1.4)	SLC38A2 (1.4)	WNT4 (1.3)	COG6 (1.2)	ENSG00000226403 (1.2)	CDC42 (1.2)	SULT1B1 (1.1)
REACTOME_NUCLEOTIDE:BINDING_DOMAIN_LEUCINE_RICH_REPEAT_CONTAINING_RECEPTOR_NLR_SIGNALING_PATHWAYS	REACTOME_NUCLEOTIDE:BINDING_DOMAIN_LEUCINE_RICH_REPEAT_CONTAINING_RECEPTOR_NLR_SIGNALING_PATHWAYS	0.09	0.900598	CD44 (3.4)	HK3 (2.4)	ENSG00000184378 (2.1)	ATM (1.9)	SULT1B1 (1.4)	LRRC31 (1.2)	TERT (1.0)	CUL5 (1.0)	KDELC2 (1.0)	CDC42 (0.7)
GO:0035107	appendage morphogenesis	0.09	0.900598	SALL1 (2.9)	ENSG00000228397 (2.6)	LRRC34 (2.0)	SH3PXD2A (1.5)	GREB1 (1.5)	TNRC6B (1.3)	WNT4 (1.3)	EXPH5 (1.1)	ENSG00000258096 (1.0)	ATM (1.0)
GO:0035108	limb morphogenesis	0.09	0.900598	SALL1 (2.9)	ENSG00000228397 (2.6)	LRRC34 (2.0)	SH3PXD2A (1.5)	GREB1 (1.5)	TNRC6B (1.3)	WNT4 (1.3)	EXPH5 (1.1)	ENSG00000258096 (1.0)	ATM (1.0)
ENSG00000115750	TAF1B PPI subnetwork	0.09	0.900598	MYNN (3.5)	UIMC1 (2.9)	MRPS31 (2.4)	ZNF346 (2.1)	SLC25A15 (1.9)	FIP1L1 (1.9)	ATM (1.7)	NPAT (1.5)	RIC8A (1.4)	ENSG00000226403 (1.3)
ENSG00000215769	ENSG00000215769 PPI subnetwork	0.09	0.900598	ATM (2.6)	FOXO1 (2.5)	NPAT (2.1)	TNRC6B (1.9)	MYNN (1.8)	LRRC34 (1.4)	PSMD13 (1.3)	DMRT1 (1.3)	TERT (1.3)	SLC38A2 (1.2)
ENSG00000182481	KPNA2 PPI subnetwork	0.09	0.900598	ATM (2.6)	FOXO1 (2.5)	NPAT (2.1)	TNRC6B (1.9)	MYNN (1.8)	LRRC34 (1.4)	PSMD13 (1.3)	DMRT1 (1.3)	TERT (1.3)	SLC38A2 (1.2)
ENSG00000105216	ENSG00000105216 PPI subnetwork	0.09	0.900598	NPAT (2.1)	UIMC1 (2.0)	TNRC6B (2.0)	LRRC31 (1.5)	SYNE1 (1.4)	SLC38A2 (1.4)	EXPH5 (1.3)	ATM (1.3)	COG6 (1.3)	HK3 (1.2)
ENSG00000111679	PTPN6 PPI subnetwork	0.09	0.900598	HK3 (3.7)	FOXO1 (3.0)	CD44 (1.7)	C11orf65 (1.6)	KANK1 (1.4)	WT1-AS (1.3)	SLC38A1 (1.3)	GREB1 (0.7)	ENSG00000228397 (0.7)	RIC8A (0.7)
GO:0051262	protein tetramerization	0.09	0.900598	SIRT3 (2.6)	ACAT1 (2.3)	ZNF346 (1.5)	SLC25A15 (1.5)	GREB1 (1.3)	ENSG00000226403 (1.3)	OBFC1 (1.2)	SYNE1 (1.0)	C11orf65 (0.9)	UIMC1 (0.8)
GO:0010389	regulation of G2/M transition of mitotic cell cycle	0.09	0.900598	NPAT (2.4)	ENSG00000258096 (2.4)	ENSG00000184378 (2.1)	KDELC2 (1.9)	UIMC1 (1.5)	SLC38A2 (1.4)	OBFC1 (1.2)	CUL5 (1.2)	CDC42-IT1 (1.1)	FIP1L1 (1.1)
REACTOME_ACTIVATION_OF_THE_PRE:REPLICATIVE_COMPLEX	REACTOME_ACTIVATION_OF_THE_PRE:REPLICATIVE_COMPLEX	0.09	0.900598	NPAT (4.4)	KDELC2 (2.1)	OBFC1 (2.0)	SLC38A2 (1.2)	ATM (1.2)	ENSG00000228397 (1.1)	MRPS31 (1.1)	UIMC1 (0.8)	ZNF346 (0.8)	LRRC31 (0.8)
GO:0008026	ATP-dependent helicase activity	0.09	0.900598	FIP1L1 (2.6)	ATM (2.5)	TERT (2.5)	NPAT (2.3)	UIMC1 (2.1)	DMRT1 (1.8)	CUL5 (1.5)	LRRC34 (1.0)	ENSG00000184378 (1.0)	MYNN (0.8)
GO:0070035	purine NTP-dependent helicase activity	0.09	0.900598	FIP1L1 (2.6)	ATM (2.5)	TERT (2.5)	NPAT (2.3)	UIMC1 (2.1)	DMRT1 (1.8)	CUL5 (1.5)	LRRC34 (1.0)	ENSG00000184378 (1.0)	MYNN (0.8)
GO:0007519	skeletal muscle tissue development	0.09	0.900598	WT1-AS (1.3)	SH3PXD2A (1.3)	SYNE1 (1.2)	OBFC1 (1.2)	TNRC6B (1.1)	FOXO1 (1.1)	ENSG00000226403 (0.9)	EXPH5 (0.7)	SLC38A1 (0.7)	KANK1 (0.7)
GO:0048524	positive regulation of viral reproduction	0.09	0.900598	FIP1L1 (2.3)	CUL5 (2.0)	RIC8A (1.8)	MYNN (1.7)	TNRC6B (1.5)	PSMD13 (1.5)	DMRT1 (1.2)	ZNF346 (1.1)	BET1L (0.9)	UIMC1 (0.9)
GO:0003697	single-stranded DNA binding	0.09	0.900598	OBFC1 (2.3)	LINC00339 (2.3)	MRPS31 (1.8)	NPAT (1.7)	UIMC1 (1.7)	TERT (1.3)	KDELC2 (1.2)	CDC42-IT1 (1.2)	SLC38A2 (1.1)	ENSG00000258096 (1.1)
ENSG00000166233	ARIH1 PPI subnetwork	0.09	0.900598	FIP1L1 (2.6)	CD44 (1.8)	MRPS31 (1.7)	WNT4 (1.5)	CDC42 (1.5)	PSMD13 (1.4)	BET1L (1.3)	RIC8A (1.3)	OBFC1 (1.2)	LNX1 (1.0)
ENSG00000160447	PKN3 PPI subnetwork	0.09	0.900598	COG6 (2.9)	TNRC6B (2.2)	CUL5 (2.0)	LRRC31 (1.9)	ATM (1.8)	ODF3 (1.7)	EXPH5 (1.6)	SYNE1 (1.6)	UIMC1 (1.2)	LNX1 (1.2)
GO:0016485	protein processing	0.09	0.900598	ENSG00000226403 (1.9)	ENSG00000184378 (1.9)	COG6 (1.4)	WT1-AS (1.4)	ATM (1.3)	GREB1 (1.2)	EXPH5 (1.1)	LRRC34 (1.0)	SIRT3 (1.0)	SULT1B1 (1.0)
MP:0002743	glomerulonephritis	0.09	0.900598	WT1-AS (3.4)	FOXO1 (2.3)	SLC38A1 (1.6)	UIMC1 (1.4)	HK3 (1.4)	MYNN (1.3)	TERT (1.2)	WNT4 (1.1)	NPAT (0.9)	ENSG00000258096 (0.8)
GO:0005689	U12-type spliceosomal complex	0.09	0.900598	FIP1L1 (2.7)	PSMD13 (2.1)	UIMC1 (1.5)	OBFC1 (1.5)	CUL5 (1.4)	MYNN (1.1)	SH3PXD2A (1.0)	SLC38A1 (0.9)	ATM (0.9)	MRPS31 (0.9)
GO:0060538	skeletal muscle organ development	0.09	0.900598	WT1-AS (2.8)	SH3PXD2A (1.6)	OBFC1 (1.2)	SYNE1 (1.1)	FOXO1 (1.1)	TNRC6B (1.0)	ENSG00000226403 (1.0)	SLC38A1 (0.9)	KANK1 (0.7)	WNT4 (0.7)
ENSG00000179335	CLK3 PPI subnetwork	0.09	0.900598	TNRC6B (3.8)	ZNF346 (1.8)	SCGB1C1 (1.2)	BET1L (1.1)	FOXO1 (1.0)	DMRT1 (0.9)	ENSG00000228397 (0.9)	KANK1 (0.8)	ENSG00000184378 (0.8)	ENSG00000258096 (0.8)
GO:0070192	chromosome organization involved in meiosis	0.09	0.900598	DMRT1 (3.1)	C11orf65 (2.2)	ATM (2.0)	KDELC2 (1.9)	LRRC34 (1.9)	ENSG00000184378 (1.6)	COG6 (1.6)	ZNF346 (1.5)	TERT (1.4)	UIMC1 (1.3)
ENSG00000118579	MED28 PPI subnetwork	0.09	0.900598	BET1L (2.5)	FIP1L1 (2.5)	MRPS31 (2.3)	RIC8A (2.3)	CUL5 (2.1)	NPAT (2.0)	ZNF346 (1.9)	UIMC1 (1.6)	COG6 (1.4)	PSMD13 (1.1)
GO:0005840	ribosome	0.09	0.900598	MRPS31 (3.8)	SIRT3 (1.4)	OBFC1 (1.3)	LINC00339 (1.1)	SLC25A15 (1.0)	ACAT1 (0.8)	ENSG00000226403 (0.8)	WT1-AS (0.8)	MYNN (0.8)	PSMD13 (0.8)
ENSG00000033800	PIAS1 PPI subnetwork	0.09	0.900598	GREB1 (5.1)	SALL1 (2.9)	FOXO1 (2.8)	SH3PXD2A (1.8)	SLC38A2 (1.2)	WNT4 (1.1)	TERT (1.0)	ODF3 (1.0)	CD44 (0.9)	TNRC6B (0.9)
MP:0009133	decreased white fat cell size	0.09	0.900598	FOXO1 (1.7)	SH3PXD2A (1.7)	NPAT (1.5)	ACAT1 (1.5)	SCGB1C1 (1.2)	TNRC6B (1.2)	WT1-AS (1.1)	ODF3 (0.9)	LRRC31 (0.8)	SLC25A15 (0.7)
KEGG_MISMATCH_REPAIR	KEGG_MISMATCH_REPAIR	0.09	0.900598	ATM (3.3)	NPAT (3.1)	SCGB1C1 (2.5)	OBFC1 (2.1)	MRPS31 (1.8)	KDELC2 (1.7)	TERT (1.6)	LINC00339 (1.4)	UIMC1 (1.2)	ENSG00000228397 (1.2)
MP:0002007	increased cellular sensitivity to gamma-irradiation	0.09	0.900598	NPAT (3.4)	UIMC1 (3.3)	OBFC1 (3.1)	KDELC2 (1.5)	ZNF346 (1.4)	LRRC34 (1.3)	ENSG00000228397 (1.3)	SLC38A2 (1.0)	ATM (1.0)	RIC8A (0.9)
GO:0031960	response to corticosteroid stimulus	0.09	0.900598	SULT1B1 (2.4)	ENSG00000258096 (2.2)	ODF3 (1.9)	C11orf65 (1.9)	CD44 (1.9)	SLC25A15 (1.7)	KANK1 (1.7)	SCGB1C1 (1.7)	LNX1 (1.6)	SH3PXD2A (1.5)
ENSG00000091831	ESR1 PPI subnetwork	0.09	0.900598	TNRC6B (4.9)	FOXO1 (3.3)	ENSG00000184378 (1.9)	SLC38A2 (1.9)	WNT4 (1.8)	MRPS31 (1.6)	ZNF346 (1.6)	FIP1L1 (1.6)	UIMC1 (1.3)	OBFC1 (1.2)
ENSG00000073756	PTGS2 PPI subnetwork	0.09	0.900598	BET1L (2.4)	KANK1 (2.3)	RIC8A (2.1)	SULT1B1 (2.0)	CDC42-IT1 (1.9)	ENSG00000226403 (1.6)	ENSG00000228397 (1.6)	PSMD13 (1.3)	FOXO1 (1.3)	CD44 (1.2)
MP:0000165	abnormal long bone hypertrophic chondrocyte zone	0.09	0.900598	KANK1 (2.7)	LNX1 (2.3)	FOXO1 (2.3)	SH3PXD2A (2.2)	GREB1 (1.6)	BET1L (1.5)	WNT4 (1.4)	ENSG00000184378 (1.3)	LRRC31 (1.3)	CD44 (1.0)
GO:0030837	negative regulation of actin filament polymerization	0.09	0.900598	ODF3 (3.1)	CDC42-IT1 (2.7)	ENSG00000258096 (2.1)	OBFC1 (1.4)	ENSG00000228397 (1.3)	CDC42 (1.3)	TNRC6B (1.1)	SCGB1C1 (1.0)	C11orf65 (0.9)	LRRC34 (0.9)
ENSG00000124151	NCOA3 PPI subnetwork	0.09	0.900598	TNRC6B (4.7)	SALL1 (2.5)	WNT4 (2.4)	GREB1 (2.2)	SH3PXD2A (2.1)	SLC38A2 (1.2)	FOXO1 (1.0)	SULT1B1 (1.0)	ENSG00000184378 (0.9)	CDC42-IT1 (0.7)
MP:0008279	arrest of spermiogenesis	0.09	0.900598	GREB1 (2.6)	EXPH5 (1.9)	C11orf65 (1.8)	SULT1B1 (1.8)	ODF3 (1.4)	DMRT1 (1.4)	FOXO1 (1.1)	HK3 (0.8)	ENSG00000228397 (0.7)	SALL1 (0.7)
ENSG00000198056	PRIM1 PPI subnetwork	0.09	0.900598	NPAT (3.6)	OBFC1 (2.6)	LINC00339 (2.0)	ENSG00000228397 (1.8)	TERT (1.8)	ATM (1.8)	UIMC1 (1.7)	MYNN (1.4)	KDELC2 (1.3)	LRRC31 (1.3)
GO:0015909	long-chain fatty acid transport	0.09	0.900598	LINC00339 (2.3)	SLC25A15 (2.1)	GREB1 (2.0)	DMRT1 (1.8)	ACAT1 (1.8)	ENSG00000184378 (1.7)	ENSG00000226403 (1.4)	COG6 (1.2)	LRRC34 (1.1)	KANK1 (1.0)
ENSG00000072501	SMC1A PPI subnetwork	0.09	0.900598	FIP1L1 (2.8)	NPAT (2.2)	UIMC1 (1.9)	ATM (1.8)	PSMD13 (1.7)	CUL5 (1.2)	MRPS31 (1.2)	SYNE1 (1.1)	CDC42-IT1 (1.1)	TNRC6B (1.1)
ENSG00000101017	CD40 PPI subnetwork	0.09	0.900598	LNX1 (3.2)	CD44 (3.0)	FOXO1 (1.9)	NPAT (1.9)	PSMD13 (1.8)	UIMC1 (1.6)	LRRC34 (1.6)	CDC42 (1.5)	MRPS31 (1.4)	FIP1L1 (1.4)
GO:0005665	DNA-directed RNA polymerase II, core complex	0.09	0.900598	BET1L (3.0)	SIRT3 (2.8)	RIC8A (2.6)	PSMD13 (2.3)	CUL5 (1.6)	ATM (1.5)	DMRT1 (1.3)	MRPS31 (1.2)	LNX1 (1.1)	SLC25A15 (1.1)
KEGG_PENTOSE_AND_GLUCURONATE_INTERCONVERSIONS	KEGG_PENTOSE_AND_GLUCURONATE_INTERCONVERSIONS	0.09	0.900598	SULT1B1 (5.5)	LRRC31 (3.8)	ACAT1 (2.4)	TERT (1.8)	SLC25A15 (1.6)	FIP1L1 (1.5)	LINC00339 (1.5)	KDELC2 (1.5)	SCGB1C1 (1.3)	GREB1 (1.2)
ENSG00000110799	VWF PPI subnetwork	0.09	0.900598	SCGB1C1 (6.0)	KDELC2 (2.1)	DMRT1 (1.9)	ENSG00000184378 (1.7)	C11orf65 (1.4)	LRRC34 (1.3)	HK3 (1.1)	SH3PXD2A (1.1)	SLC25A15 (1.0)	SIRT3 (1.0)
REACTOME_MITOTIC_PROMETAPHASE	REACTOME_MITOTIC_PROMETAPHASE	0.09	0.900598	NPAT (2.4)	ATM (1.6)	KDELC2 (1.3)	ACAT1 (1.1)	COG6 (0.9)	SLC38A2 (0.8)	CUL5 (0.7)	LINC00339 (0.7)	PSMD13 (0.6)	TNRC6B (0.6)
ENSG00000180182	MED14 PPI subnetwork	0.09	0.900598	UIMC1 (2.5)	CUL5 (2.5)	MRPS31 (2.2)	NPAT (2.1)	ZNF346 (1.6)	BET1L (1.5)	TNRC6B (1.3)	RIC8A (1.3)	FIP1L1 (1.3)	ATM (1.2)
GO:0046661	male sex differentiation	0.09	0.900598	DMRT1 (6.6)	WT1-AS (2.9)	ODF3 (2.6)	GREB1 (2.4)	ENSG00000228397 (1.9)	KANK1 (1.6)	WNT4 (1.6)	LNX1 (1.5)	ENSG00000184378 (1.0)	LRRC34 (0.8)
ENSG00000111731	KIAA0528 PPI subnetwork	0.09	0.900598	NPAT (2.2)	EXPH5 (2.1)	TNRC6B (2.0)	COG6 (1.8)	SYNE1 (1.8)	CUL5 (1.8)	OBFC1 (1.7)	SLC38A2 (1.7)	ATM (1.6)	ODF3 (1.4)
GO:0072331	signal transduction by p53 class mediator	0.09	0.900598	PSMD13 (2.7)	ENSG00000228397 (2.7)	LINC00339 (1.7)	MYNN (1.6)	DMRT1 (1.4)	CDC42 (1.2)	MRPS31 (1.2)	NPAT (1.1)	RIC8A (1.1)	GREB1 (1.0)
GO:0004222	metalloendopeptidase activity	0.09	0.900598	ODF3 (3.0)	SULT1B1 (3.0)	ENSG00000184378 (2.3)	SH3PXD2A (2.2)	WNT4 (2.2)	ACAT1 (1.4)	C11orf65 (1.4)	LNX1 (1.2)	WT1-AS (1.1)	DMRT1 (0.9)
GO:0051604	protein maturation	0.09	0.900598	ENSG00000184378 (2.7)	COG6 (1.9)	ENSG00000226403 (1.6)	ATM (1.5)	WT1-AS (1.3)	LRRC34 (1.2)	KDELC2 (1.2)	GREB1 (1.2)	EXPH5 (1.1)	SULT1B1 (0.8)
GO:0005730	nucleolus	0.09	0.900598	FIP1L1 (3.1)	MRPS31 (2.0)	ATM (1.5)	NPAT (1.5)	WT1-AS (1.2)	ENSG00000226403 (1.1)	MYNN (1.1)	UIMC1 (1.1)	TERT (1.1)	KANK1 (1.0)
ENSG00000145386	CCNA2 PPI subnetwork	0.1	0.900598	NPAT (4.0)	KDELC2 (2.3)	ZNF346 (2.1)	GREB1 (1.9)	SLC25A15 (1.8)	MRPS31 (1.2)	UIMC1 (0.9)	TERT (0.8)	WT1-AS (0.7)	FIP1L1 (0.7)
MP:0004355	short radius	0.1	0.900598	SALL1 (3.2)	LRRC34 (2.6)	FOXO1 (2.0)	SH3PXD2A (1.9)	WNT4 (1.6)	GREB1 (1.2)	WT1-AS (1.1)	COG6 (1.1)	KANK1 (1.1)	SLC38A1 (0.9)
GO:0016407	acetyltransferase activity	0.1	0.900598	SIRT3 (2.6)	CUL5 (1.8)	TNRC6B (1.8)	OBFC1 (1.6)	MRPS31 (1.4)	KDELC2 (1.2)	ACAT1 (1.2)	SALL1 (1.2)	LRRC31 (1.2)	TERT (1.1)
MP:0001152	Leydig cell hyperplasia	0.1	0.900598	DMRT1 (3.6)	GREB1 (2.9)	SULT1B1 (2.3)	LINC00339 (2.1)	WT1-AS (1.7)	WNT4 (1.6)	SIRT3 (1.4)	FIP1L1 (1.3)	FOXO1 (1.2)	OBFC1 (1.0)
MP:0002777	absent ovarian follicles	0.1	0.900598	DMRT1 (3.5)	KDELC2 (2.3)	C11orf65 (1.9)	TERT (1.9)	NPAT (1.7)	GREB1 (1.5)	SLC25A15 (1.0)	ENSG00000226403 (1.0)	LRRC34 (1.0)	UIMC1 (1.0)
ENSG00000161920	MED11 PPI subnetwork	0.1	0.900598	NPAT (2.1)	UIMC1 (2.0)	MRPS31 (2.0)	BET1L (2.0)	FIP1L1 (2.0)	CUL5 (2.0)	ZNF346 (1.9)	MYNN (1.9)	RIC8A (1.2)	TNRC6B (1.0)
GO:0033151	V(D)J recombination	0.1	0.900598	FOXO1 (2.8)	TERT (2.7)	OBFC1 (2.5)	ATM (1.7)	MRPS31 (1.5)	C11orf65 (1.4)	GREB1 (1.1)	ODF3 (1.1)	NPAT (0.9)	TNRC6B (0.9)
ENSG00000196305	IARS PPI subnetwork	0.1	0.900598	COG6 (2.4)	CDC42 (2.1)	RIC8A (1.9)	PSMD13 (1.8)	MYNN (1.6)	FOXO1 (1.5)	SLC38A2 (1.4)	BET1L (1.4)	MRPS31 (1.3)	ACAT1 (1.3)
GO:0031063	regulation of histone deacetylation	0.1	0.900598	CDC42-IT1 (2.0)	SH3PXD2A (2.0)	LINC00339 (1.9)	TNRC6B (1.7)	COG6 (1.5)	ATM (1.1)	NPAT (1.1)	EXPH5 (1.0)	SCGB1C1 (0.8)	DMRT1 (0.8)
MP:0003139	patent ductus arteriosus	0.1	0.900598	ENSG00000258096 (1.6)	SH3PXD2A (1.5)	LRRC34 (1.4)	SULT1B1 (1.4)	KANK1 (1.4)	LNX1 (1.3)	CD44 (1.3)	ENSG00000226403 (1.3)	GREB1 (1.2)	OBFC1 (1.2)
GO:0046164	alcohol catabolic process	0.1	0.900598	C11orf65 (2.5)	SIRT3 (1.8)	LRRC34 (1.8)	OBFC1 (1.5)	SLC25A15 (1.5)	LNX1 (1.4)	ODF3 (1.2)	LRRC31 (1.1)	ACAT1 (1.1)	SULT1B1 (1.0)
ENSG00000006712	PAF1 PPI subnetwork	0.1	0.900598	FIP1L1 (3.1)	RIC8A (2.6)	CUL5 (2.0)	UIMC1 (2.0)	MRPS31 (1.9)	PSMD13 (1.8)	OBFC1 (1.5)	CDC42-IT1 (1.3)	SYNE1 (1.3)	ENSG00000228397 (1.1)
ENSG00000090615	GOLGA3 PPI subnetwork	0.1	0.900598	BET1L (2.6)	SH3PXD2A (2.4)	SULT1B1 (1.9)	COG6 (1.8)	LNX1 (1.8)	FOXO1 (1.8)	MYNN (1.8)	C11orf65 (1.7)	ENSG00000184378 (1.2)	DMRT1 (1.2)
ENSG00000127993	RBM48 PPI subnetwork	0.1	0.900598	LRRC31 (2.7)	LINC00339 (2.3)	SALL1 (2.2)	ZNF346 (1.3)	UIMC1 (1.3)	SLC38A2 (1.2)	ACAT1 (0.9)	OBFC1 (0.9)	SULT1B1 (0.9)	NPAT (0.8)
ENSG00000173366	ENSG00000173366 PPI subnetwork	0.1	0.900598	RIC8A (4.2)	CDC42 (2.2)	CDC42-IT1 (1.9)	BET1L (1.6)	ATM (1.6)	PSMD13 (1.5)	SULT1B1 (1.3)	LINC00339 (0.9)	C11orf65 (0.9)	CD44 (0.9)
GO:0030193	regulation of blood coagulation	0.1	0.900598	SCGB1C1 (3.6)	ENSG00000226403 (2.1)	LRRC31 (1.8)	LINC00339 (1.5)	LNX1 (1.3)	SULT1B1 (1.3)	CUL5 (1.2)	C11orf65 (1.2)	WNT4 (1.1)	SLC25A15 (1.1)
GO:0030879	mammary gland development	0.1	0.900598	GREB1 (4.0)	WNT4 (2.4)	SH3PXD2A (2.2)	EXPH5 (2.2)	SLC25A15 (1.6)	ENSG00000226403 (1.6)	SALL1 (1.6)	WT1-AS (1.3)	SCGB1C1 (0.9)	KANK1 (0.9)
ENSG00000198961	PJA2 PPI subnetwork	0.1	0.900598	CUL5 (4.8)	MYNN (2.6)	LINC00339 (2.5)	ZNF346 (2.2)	ATM (2.1)	UIMC1 (2.0)	FIP1L1 (2.0)	NPAT (1.8)	SLC38A2 (1.5)	TNRC6B (1.4)
ENSG00000166484	MAPK7 PPI subnetwork	0.1	0.900598	CDC42 (2.8)	FOXO1 (2.3)	SYNE1 (2.1)	ENSG00000184378 (1.8)	TERT (1.4)	TNRC6B (1.1)	SLC25A15 (1.1)	PSMD13 (1.0)	SLC38A2 (1.0)	ENSG00000228397 (0.9)
ENSG00000189403	HMGB1 PPI subnetwork	0.1	0.900598	SCGB1C1 (2.3)	SALL1 (2.1)	GREB1 (1.6)	WT1-AS (1.5)	NPAT (1.4)	CUL5 (1.4)	SLC38A2 (1.3)	ENSG00000258096 (1.2)	WNT4 (1.1)	TNRC6B (1.1)
GO:0008584	male gonad development	0.1	0.900598	DMRT1 (7.2)	WT1-AS (3.9)	ODF3 (2.4)	GREB1 (2.4)	ENSG00000228397 (2.2)	LNX1 (1.9)	C11orf65 (1.6)	KANK1 (1.5)	WNT4 (1.0)	FIP1L1 (0.8)
ENSG00000156136	DCK PPI subnetwork	0.1	0.900598	CUL5 (2.3)	NPAT (1.9)	COG6 (1.9)	ODF3 (1.7)	TNRC6B (1.6)	EXPH5 (1.5)	LRRC31 (1.4)	SYNE1 (1.3)	SLC38A2 (1.2)	ATM (1.0)
REACTOME_SYNTHESIS_OF_BILE_ACIDS_AND_BILE_SALTS_VIA_7ALPHA:HYDROXYCHOLESTEROL	REACTOME_SYNTHESIS_OF_BILE_ACIDS_AND_BILE_SALTS_VIA_7ALPHA:HYDROXYCHOLESTEROL	0.1	0.900598	SLC25A15 (3.4)	SIRT3 (2.4)	SULT1B1 (2.2)	ACAT1 (1.9)	SALL1 (1.6)	EXPH5 (1.5)	LRRC31 (1.3)	HK3 (1.0)	ENSG00000258096 (0.9)	C11orf65 (0.9)
MP:0003992	increased mortality induced by ionizing radiation	0.1	0.900598	ATM (2.8)	KDELC2 (2.0)	DMRT1 (1.8)	TERT (1.7)	SLC25A15 (1.7)	NPAT (1.4)	GREB1 (1.4)	CDC42-IT1 (1.3)	ENSG00000226403 (1.1)	LRRC34 (1.0)
ENSG00000106397	PLOD3 PPI subnetwork	0.1	0.900598	OBFC1 (2.3)	ACAT1 (1.9)	SIRT3 (1.7)	DMRT1 (1.7)	PSMD13 (1.5)	MYNN (0.9)	SCGB1C1 (0.9)	MRPS31 (0.8)	LRRC31 (0.8)	COG6 (0.8)
GO:0010833	telomere maintenance via telomere lengthening	0.1	0.900598	OBFC1 (3.6)	TERT (3.4)	NPAT (3.3)	ATM (2.8)	ENSG00000228397 (2.3)	KDELC2 (2.3)	ZNF346 (2.0)	UIMC1 (1.6)	MRPS31 (1.2)	LINC00339 (1.1)
GO:0060675	ureteric bud morphogenesis	0.1	0.900598	WT1-AS (4.3)	WNT4 (3.7)	SALL1 (3.2)	ENSG00000228397 (2.9)	KANK1 (1.7)	GREB1 (1.1)	SIRT3 (1.1)	ENSG00000258096 (1.0)	BET1L (0.9)	ATM (0.8)
ENSG00000135365	PHF21A PPI subnetwork	0.1	0.900598	DMRT1 (2.3)	SALL1 (2.0)	C11orf65 (1.8)	UIMC1 (1.8)	TERT (1.7)	FIP1L1 (1.7)	ENSG00000258096 (1.5)	SLC25A15 (1.5)	SH3PXD2A (1.5)	GREB1 (1.4)
MP:0009050	dilated proximal convoluted tubules	0.1	0.900598	SYNE1 (2.7)	WT1-AS (2.5)	ENSG00000226403 (1.6)	SIRT3 (1.6)	OBFC1 (1.5)	RIC8A (1.3)	ZNF346 (1.3)	WNT4 (1.2)	UIMC1 (1.2)	LINC00339 (1.1)
MP:0010701	fusion of atlas and odontoid process	0.1	0.900598	WNT4 (2.6)	WT1-AS (2.1)	CDC42-IT1 (1.7)	UIMC1 (1.3)	OBFC1 (1.2)	TERT (1.1)	ENSG00000258096 (0.9)	TNRC6B (0.9)	SULT1B1 (0.9)	ENSG00000184378 (0.9)
GO:0031490	chromatin DNA binding	0.1	0.900598	TNRC6B (1.9)	TERT (1.8)	SULT1B1 (1.8)	SALL1 (1.5)	CDC42-IT1 (1.4)	KANK1 (1.4)	ENSG00000258096 (1.3)	UIMC1 (1.0)	SLC38A2 (0.8)	LRRC34 (0.6)
GO:0090068	positive regulation of cell cycle process	0.1	0.900598	PSMD13 (2.4)	ENSG00000228397 (2.0)	ZNF346 (1.6)	ENSG00000258096 (1.5)	MRPS31 (1.3)	FIP1L1 (1.1)	C11orf65 (1.0)	GREB1 (1.0)	CUL5 (1.0)	CDC42 (0.9)
MP:0001651	necrosis	0.1	0.900598	SLC25A15 (4.8)	WT1-AS (3.9)	FOXO1 (2.3)	ENSG00000226403 (2.0)	LRRC31 (1.9)	SALL1 (1.6)	GREB1 (1.3)	MRPS31 (1.2)	WNT4 (1.1)	LINC00339 (1.0)
MP:0004014	abnormal uterine environment	0.1	0.900598	GREB1 (8.1)	SALL1 (4.0)	SLC38A1 (1.7)	WNT4 (1.7)	LRRC31 (1.1)	KANK1 (1.1)	ENSG00000184378 (1.1)	FOXO1 (1.1)	MYNN (1.0)	WT1-AS (1.0)
ENSG00000172288	CDY1 PPI subnetwork	0.1	0.900598	ENSG00000228397 (2.1)	BET1L (1.5)	DMRT1 (1.4)	ENSG00000258096 (1.3)	SCGB1C1 (1.2)	LNX1 (1.2)	SIRT3 (1.2)	FIP1L1 (1.1)	CUL5 (1.1)	SLC38A2 (1.1)
ENSG00000172352	CDY1B PPI subnetwork	0.1	0.900598	ENSG00000228397 (2.1)	BET1L (1.5)	DMRT1 (1.4)	ENSG00000258096 (1.3)	SCGB1C1 (1.2)	LNX1 (1.2)	SIRT3 (1.2)	FIP1L1 (1.1)	CUL5 (1.1)	SLC38A2 (1.1)
ENSG00000161956	SENP3 PPI subnetwork	0.1	0.900598	TNRC6B (3.1)	NPAT (1.9)	LINC00339 (1.5)	DMRT1 (1.4)	UIMC1 (1.3)	COG6 (1.2)	ENSG00000228397 (1.2)	MRPS31 (1.0)	ENSG00000184378 (0.9)	ZNF346 (0.9)
MP:0003132	increased pre-B cell number	0.1	0.900598	LRRC34 (2.4)	SLC38A1 (2.2)	FOXO1 (1.8)	TERT (1.5)	CD44 (1.4)	ENSG00000228397 (1.4)	SLC38A2 (1.4)	SCGB1C1 (1.2)	DMRT1 (1.1)	MYNN (1.0)
MP:0001698	decreased embryo size	0.1	0.900598	SALL1 (3.0)	KANK1 (2.3)	SLC38A2 (1.9)	TNRC6B (1.8)	WT1-AS (1.6)	UIMC1 (1.4)	FOXO1 (1.4)	SLC25A15 (1.2)	NPAT (0.9)	TERT (0.9)
GO:0006096	glycolysis	0.1	0.900598	C11orf65 (3.5)	ODF3 (1.9)	SIRT3 (1.7)	LRRC34 (1.3)	COG6 (1.2)	LNX1 (1.1)	OBFC1 (1.1)	SLC38A1 (1.0)	DMRT1 (0.9)	SLC25A15 (0.7)
GO:0009954	proximal/distal pattern formation	0.1	0.900598	SALL1 (3.6)	LRRC34 (2.3)	WT1-AS (2.0)	ENSG00000226403 (1.4)	KANK1 (1.4)	LNX1 (1.4)	WNT4 (1.3)	TERT (1.2)	SH3PXD2A (1.0)	ODF3 (0.8)
MP:0002465	abnormal eosinophil physiology	0.1	0.900598	SULT1B1 (2.8)	FOXO1 (1.6)	HK3 (1.5)	ENSG00000228397 (1.3)	NPAT (1.1)	SYNE1 (1.0)	TERT (1.0)	LRRC34 (1.0)	COG6 (1.0)	WT1-AS (0.9)
ENSG00000170145	SIK2 PPI subnetwork	0.1	0.900598	COG6 (2.7)	UIMC1 (2.1)	KANK1 (2.0)	SLC38A2 (2.0)	LRRC31 (1.9)	CUL5 (1.8)	TNRC6B (1.7)	SYNE1 (1.7)	ODF3 (1.6)	EXPH5 (1.4)
MP:0008475	intermingled spleen red and white pulp	0.1	0.900598	HK3 (1.8)	WNT4 (1.6)	BET1L (1.5)	CD44 (1.5)	SULT1B1 (1.4)	LRRC31 (1.0)	CDC42-IT1 (1.0)	SH3PXD2A (1.0)	DMRT1 (0.6)	WT1-AS (0.5)
ENSG00000160844	GATS PPI subnetwork	0.1	0.900598	MYNN (3.7)	MRPS31 (1.9)	FIP1L1 (1.4)	UIMC1 (1.3)	PSMD13 (1.2)	LINC00339 (1.1)	TERT (1.0)	COG6 (0.9)	ENSG00000258096 (0.8)	KDELC2 (0.8)
MP:0005627	increased circulating potassium level	0.1	0.900598	SALL1 (3.8)	WNT4 (3.1)	FOXO1 (2.0)	EXPH5 (1.8)	LRRC31 (1.6)	DMRT1 (1.2)	SYNE1 (1.1)	GREB1 (1.1)	ENSG00000226403 (1.1)	ACAT1 (1.1)
ENSG00000099956	SMARCB1 PPI subnetwork	0.1	0.900598	SCGB1C1 (2.5)	TNRC6B (2.3)	CUL5 (2.1)	FIP1L1 (1.8)	ENSG00000258096 (1.5)	NPAT (1.0)	LNX1 (0.9)	SLC38A2 (0.9)	CDC42-IT1 (0.9)	FOXO1 (0.8)
ENSG00000166333	ILK PPI subnetwork	0.1	0.900598	HK3 (1.9)	ATM (1.9)	PSMD13 (1.8)	SYNE1 (1.7)	LINC00339 (1.6)	RIC8A (1.6)	SLC38A2 (1.3)	CD44 (1.2)	TNRC6B (1.1)	ZNF346 (1.1)
GO:0022618	ribonucleoprotein complex assembly	0.1	0.900598	TERT (2.0)	ATM (1.8)	ZNF346 (1.7)	FIP1L1 (1.6)	UIMC1 (1.6)	MRPS31 (1.5)	CUL5 (1.4)	LRRC34 (1.4)	MYNN (1.2)	RIC8A (1.1)
MP:0001939	secondary sex reversal	0.1	0.900598	WT1-AS (4.3)	DMRT1 (3.9)	GREB1 (3.2)	WNT4 (1.8)	ZNF346 (1.2)	ENSG00000258096 (1.2)	SLC38A2 (1.1)	ODF3 (1.0)	EXPH5 (0.9)	C11orf65 (0.8)
GO:0004745	retinol dehydrogenase activity	0.1	0.900598	SULT1B1 (3.5)	WNT4 (2.8)	EXPH5 (2.6)	SALL1 (2.3)	LINC00339 (1.2)	SYNE1 (1.0)	LRRC31 (0.8)	TERT (0.8)	OBFC1 (0.8)	SLC25A15 (0.6)
MP:0005478	decreased circulating thyroxine level	0.1	0.900598	SALL1 (4.4)	CD44 (1.8)	FOXO1 (1.8)	KANK1 (1.7)	WNT4 (1.6)	SLC25A15 (1.4)	LRRC34 (1.1)	WT1-AS (1.1)	LRRC31 (1.0)	SYNE1 (1.0)
GO:0008080	N-acetyltransferase activity	0.1	0.900598	SIRT3 (2.5)	TNRC6B (1.8)	RIC8A (1.8)	OBFC1 (1.5)	FIP1L1 (1.5)	MYNN (1.3)	SALL1 (1.2)	TERT (1.1)	CDC42-IT1 (1.1)	UIMC1 (1.0)
MP:0005560	decreased circulating glucose level	0.1	0.900598	FOXO1 (3.7)	ACAT1 (2.8)	GREB1 (2.6)	SLC25A15 (2.4)	SH3PXD2A (2.1)	SIRT3 (1.4)	TERT (0.9)	MRPS31 (0.8)	WT1-AS (0.7)	TNRC6B (0.7)
GO:0042455	ribonucleoside biosynthetic process	0.1	0.900598	SLC25A15 (2.0)	KDELC2 (1.8)	C11orf65 (1.8)	UIMC1 (1.2)	ATM (1.1)	ENSG00000226403 (1.1)	COG6 (1.0)	ENSG00000184378 (1.0)	SULT1B1 (1.0)	TERT (1.0)
GO:0046129	purine ribonucleoside biosynthetic process	0.1	0.900598	SLC25A15 (2.0)	KDELC2 (1.8)	C11orf65 (1.8)	UIMC1 (1.2)	ATM (1.1)	ENSG00000226403 (1.1)	COG6 (1.0)	ENSG00000184378 (1.0)	SULT1B1 (1.0)	TERT (1.0)
GO:0042451	purine nucleoside biosynthetic process	0.1	0.900598	SLC25A15 (2.0)	KDELC2 (1.8)	C11orf65 (1.8)	UIMC1 (1.2)	ATM (1.1)	ENSG00000226403 (1.1)	COG6 (1.0)	ENSG00000184378 (1.0)	SULT1B1 (1.0)	TERT (1.0)
GO:0043498	cell surface binding	0.1	0.900598	HK3 (3.5)	SCGB1C1 (2.6)	SLC25A15 (1.9)	ACAT1 (1.5)	CD44 (1.3)	WNT4 (1.2)	SIRT3 (1.1)	CUL5 (1.0)	ENSG00000258096 (0.9)	SULT1B1 (0.7)
GO:0042074	cell migration involved in gastrulation	0.1	0.900598	GREB1 (1.8)	SCGB1C1 (1.6)	LINC00339 (1.4)	TNRC6B (1.1)	SALL1 (1.1)	TERT (1.1)	ENSG00000226403 (0.9)	KANK1 (0.8)	SH3PXD2A (0.8)	COG6 (0.7)
GO:0031667	response to nutrient levels	0.1	0.900598	DMRT1 (2.5)	SLC25A15 (1.8)	SULT1B1 (1.6)	WNT4 (1.5)	SLC38A2 (1.3)	ENSG00000184378 (1.3)	SIRT3 (1.0)	TNRC6B (1.0)	KANK1 (1.0)	CD44 (0.9)
GO:0000216	M/G1 transition of mitotic cell cycle	0.1	0.900598	PSMD13 (2.9)	ENSG00000228397 (1.9)	NPAT (1.8)	MRPS31 (1.6)	ZNF346 (1.6)	MYNN (1.5)	ENSG00000258096 (1.5)	OBFC1 (1.5)	ENSG00000184378 (1.1)	LINC00339 (1.1)
MP:0006362	abnormal male germ cell morphology	0.1	0.900598	DMRT1 (5.2)	ODF3 (2.7)	C11orf65 (2.3)	BET1L (2.0)	KANK1 (1.5)	ENSG00000226403 (1.2)	SULT1B1 (1.0)	COG6 (1.0)	LNX1 (0.9)	LRRC34 (0.9)
ENSG00000094880	CDC23 PPI subnetwork	0.1	0.900598	COG6 (2.5)	MRPS31 (2.2)	KDELC2 (1.8)	ACAT1 (1.5)	FIP1L1 (1.3)	LINC00339 (1.3)	CDC42-IT1 (0.8)	UIMC1 (0.8)	KANK1 (0.8)	SLC38A2 (0.8)
ENSG00000198933	TBKBP1 PPI subnetwork	0.1	0.900598	COG6 (2.7)	SLC38A2 (2.0)	LRRC31 (1.8)	CUL5 (1.7)	NPAT (1.6)	ODF3 (1.5)	SYNE1 (1.5)	ATM (1.4)	EXPH5 (1.3)	TNRC6B (1.2)
ENSG00000106290	TAF6 PPI subnetwork	0.1	0.900598	RIC8A (2.6)	DMRT1 (2.5)	SCGB1C1 (2.3)	ATM (2.2)	FIP1L1 (2.2)	MRPS31 (2.0)	CUL5 (1.7)	PSMD13 (1.6)	UIMC1 (1.6)	NPAT (1.6)
GO:0060173	limb development	0.1	0.900598	SALL1 (2.7)	ENSG00000228397 (2.3)	LRRC34 (2.3)	SH3PXD2A (1.5)	GREB1 (1.3)	WNT4 (1.3)	TNRC6B (1.1)	TERT (1.1)	LNX1 (1.0)	KANK1 (0.9)
GO:0048736	appendage development	0.1	0.900598	SALL1 (2.7)	ENSG00000228397 (2.3)	LRRC34 (2.3)	SH3PXD2A (1.5)	GREB1 (1.3)	WNT4 (1.3)	TNRC6B (1.1)	TERT (1.1)	LNX1 (1.0)	KANK1 (0.9)
ENSG00000091651	ORC6 PPI subnetwork	0.1	0.900598	NPAT (3.7)	OBFC1 (1.8)	ENSG00000228397 (1.5)	KDELC2 (1.4)	FIP1L1 (1.1)	LINC00339 (1.1)	LRRC31 (1.1)	UIMC1 (1.0)	MRPS31 (0.8)	ATM (0.7)
GO:0019840	isoprenoid binding	0.1	0.900598	WNT4 (2.3)	WT1-AS (1.9)	GREB1 (1.7)	LRRC34 (1.6)	SULT1B1 (1.6)	TERT (1.6)	SALL1 (1.4)	ODF3 (1.2)	DMRT1 (1.0)	KANK1 (0.7)
ENSG00000099246	RAB18 PPI subnetwork	0.1	0.900598	CDC42 (3.9)	NPAT (1.9)	OBFC1 (1.8)	ZNF346 (1.8)	ATM (1.7)	ENSG00000228397 (1.6)	ACAT1 (1.6)	ENSG00000184378 (1.4)	EXPH5 (1.4)	KDELC2 (1.3)
GO:0000097	sulfur amino acid biosynthetic process	0.1	0.900598	ENSG00000226403 (1.9)	ENSG00000184378 (1.7)	ZNF346 (1.3)	SIRT3 (1.2)	FIP1L1 (1.2)	LNX1 (1.1)	SLC38A1 (1.1)	KDELC2 (1.0)	EXPH5 (1.0)	SALL1 (1.0)
GO:0034660	ncRNA metabolic process	0.1	0.900598	MRPS31 (2.8)	TERT (2.1)	RIC8A (1.8)	ATM (1.8)	C11orf65 (1.7)	LINC00339 (1.4)	ENSG00000226403 (1.4)	SLC38A1 (1.3)	FIP1L1 (1.3)	UIMC1 (1.2)
GO:0016747	transferase activity, transferring acyl groups other than amino-acyl groups	0.1	0.900598	SLC25A15 (2.6)	ACAT1 (2.3)	SIRT3 (1.9)	OBFC1 (1.8)	SALL1 (1.8)	SULT1B1 (1.7)	KDELC2 (1.0)	DMRT1 (1.0)	MRPS31 (1.0)	TNRC6B (0.9)
GO:0009991	response to extracellular stimulus	0.1	0.900598	DMRT1 (2.2)	SLC25A15 (1.8)	WNT4 (1.6)	SLC38A2 (1.6)	SULT1B1 (1.5)	TNRC6B (1.1)	LINC00339 (1.0)	SIRT3 (0.9)	CD44 (0.9)	SH3PXD2A (0.9)
REACTOME_DEADENYLATION_OF_MRNA	REACTOME_DEADENYLATION_OF_MRNA	0.1	0.900598	MYNN (3.8)	UIMC1 (3.6)	LRRC31 (1.5)	ENSG00000228397 (1.5)	COG6 (1.3)	LINC00339 (1.3)	LRRC34 (1.3)	C11orf65 (1.2)	FIP1L1 (1.1)	EXPH5 (1.0)
ENSG00000014641	MDH1 PPI subnetwork	0.1	0.900598	ACAT1 (2.8)	SALL1 (1.9)	LRRC31 (1.9)	SLC38A2 (1.7)	OBFC1 (1.0)	COG6 (0.9)	KANK1 (0.6)	ENSG00000258096 (0.6)	ATM (0.6)	WT1-AS (0.5)
ENSG00000023191	RNH1 PPI subnetwork	0.1	0.900598	OBFC1 (2.2)	ACAT1 (2.2)	LRRC34 (1.8)	PSMD13 (1.5)	SIRT3 (1.4)	MRPS31 (1.3)	LRRC31 (1.3)	SCGB1C1 (1.1)	BET1L (1.1)	MYNN (1.1)
KEGG_COMPLEMENT_AND_COAGULATION_CASCADES	KEGG_COMPLEMENT_AND_COAGULATION_CASCADES	0.1	0.900598	SLC25A15 (1.3)	C11orf65 (1.3)	SULT1B1 (1.2)	CD44 (1.2)	ENSG00000184378 (1.2)	HK3 (1.0)	WNT4 (0.9)	ENSG00000258096 (0.8)	SYNE1 (0.6)	KDELC2 (0.5)
GO:0051153	regulation of striated muscle cell differentiation	0.1	0.900598	TNRC6B (2.0)	BET1L (1.9)	KANK1 (1.5)	RIC8A (1.5)	SIRT3 (1.4)	ENSG00000258096 (1.2)	MYNN (1.1)	LINC00339 (1.0)	SYNE1 (0.8)	SLC38A1 (0.8)
GO:0007548	sex differentiation	0.1	0.900598	DMRT1 (5.3)	GREB1 (4.0)	WT1-AS (2.7)	KANK1 (2.2)	ODF3 (2.2)	ENSG00000226403 (1.9)	WNT4 (1.8)	ENSG00000228397 (1.8)	SALL1 (1.6)	LNX1 (1.4)
ENSG00000137818	RPLP1 PPI subnetwork	0.1	0.900598	CDC42 (3.8)	CDC42-IT1 (1.5)	LINC00339 (1.3)	TNRC6B (1.2)	LRRC34 (1.1)	SULT1B1 (1.0)	ENSG00000226403 (0.8)	PSMD13 (0.7)	DMRT1 (0.7)	OBFC1 (0.7)
GO:0032496	response to lipopolysaccharide	0.1	0.900598	HK3 (2.9)	CD44 (2.2)	SULT1B1 (2.2)	LNX1 (2.1)	ENSG00000184378 (1.2)	LRRC31 (1.0)	KANK1 (0.9)	DMRT1 (0.7)	UIMC1 (0.7)	ZNF346 (0.7)
GO:2000027	regulation of organ morphogenesis	0.1	0.900598	SALL1 (3.3)	WNT4 (2.6)	WT1-AS (2.3)	EXPH5 (1.9)	SH3PXD2A (1.7)	KANK1 (1.7)	ENSG00000228397 (1.5)	GREB1 (1.3)	SLC38A1 (1.1)	SCGB1C1 (1.1)
GO:0005776	autophagic vacuole	0.1	0.900598	SIRT3 (1.9)	BET1L (1.9)	GREB1 (1.7)	ZNF346 (1.6)	ENSG00000258096 (1.3)	ENSG00000184378 (1.3)	TNRC6B (1.2)	ODF3 (1.1)	LRRC31 (1.1)	SYNE1 (0.9)
MP:0001823	thymus hypoplasia	0.1	0.900598	TNRC6B (2.0)	WT1-AS (1.9)	CUL5 (1.6)	TERT (1.4)	FOXO1 (1.4)	SLC38A1 (1.3)	NPAT (1.2)	FIP1L1 (0.9)	HK3 (0.9)	C11orf65 (0.9)
GO:0008653	lipopolysaccharide metabolic process	0.1	0.900598	BET1L (2.0)	CDC42-IT1 (1.7)	COG6 (1.7)	LINC00339 (1.5)	SULT1B1 (1.4)	UIMC1 (1.4)	ENSG00000226403 (1.3)	SIRT3 (1.1)	SH3PXD2A (1.0)	WNT4 (0.9)
MP:0001828	abnormal T cell activation	0.1	0.900598	CD44 (2.1)	SLC38A1 (2.1)	HK3 (1.5)	RIC8A (1.3)	FOXO1 (1.0)	CUL5 (0.9)	SLC38A2 (0.9)	TNRC6B (0.9)	DMRT1 (0.6)	MYNN (0.6)
GO:0033865	nucleoside bisphosphate metabolic process	0.1	0.900598	SULT1B1 (3.6)	ZNF346 (2.7)	OBFC1 (2.2)	SLC25A15 (2.0)	LINC00339 (2.0)	LNX1 (1.8)	UIMC1 (1.6)	TERT (1.4)	KANK1 (1.3)	SIRT3 (1.0)
ENSG00000212664	ENSG00000212664 PPI subnetwork	0.1	0.900598	BET1L (2.1)	WT1-AS (1.6)	ENSG00000226403 (1.4)	MYNN (1.3)	SCGB1C1 (1.1)	DMRT1 (1.0)	MRPS31 (0.9)	KDELC2 (0.9)	PSMD13 (0.8)	NPAT (0.7)
ENSG00000007968	E2F2 PPI subnetwork	0.1	0.900598	MRPS31 (2.1)	MYNN (1.8)	SLC38A2 (1.8)	TERT (1.7)	SLC25A15 (1.5)	WT1-AS (1.3)	UIMC1 (1.2)	TNRC6B (1.2)	CUL5 (0.9)	ZNF346 (0.9)
GO:0008408	3'-5' exonuclease activity	0.1	0.900598	ATM (3.5)	MRPS31 (3.1)	UIMC1 (2.7)	NPAT (2.1)	CDC42-IT1 (2.0)	OBFC1 (1.9)	LINC00339 (1.8)	TERT (1.6)	FIP1L1 (1.5)	KDELC2 (1.5)
ENSG00000172943	PHF8 PPI subnetwork	0.1	0.900598	UIMC1 (3.0)	MRPS31 (1.8)	DMRT1 (1.7)	FIP1L1 (1.7)	LINC00339 (1.4)	RIC8A (1.2)	MYNN (1.2)	ENSG00000226403 (1.2)	OBFC1 (1.1)	NPAT (1.0)
ENSG00000147854	UHRF2 PPI subnetwork	0.1	0.900598	UIMC1 (3.1)	MYNN (2.1)	LINC00339 (1.9)	NPAT (1.8)	RIC8A (1.8)	SLC25A15 (1.6)	ENSG00000226403 (1.4)	CDC42-IT1 (1.4)	ZNF346 (1.3)	COG6 (1.3)
ENSG00000078399	HOXA9 PPI subnetwork	0.1	0.900598	SALL1 (2.9)	WNT4 (2.5)	KDELC2 (1.7)	TNRC6B (1.7)	CDC42-IT1 (1.7)	SCGB1C1 (1.6)	KANK1 (1.3)	MYNN (1.2)	WT1-AS (1.2)	UIMC1 (1.0)
ENSG00000152661	GJA1 PPI subnetwork	0.1	0.900598	ENSG00000226403 (3.0)	ENSG00000228397 (2.3)	CD44 (2.2)	SYNE1 (2.0)	KANK1 (1.8)	SULT1B1 (1.5)	UIMC1 (1.4)	CDC42-IT1 (1.1)	TERT (1.0)	SALL1 (0.8)
ENSG00000100280	AP1B1 PPI subnetwork	0.1	0.900598	TNRC6B (3.1)	SULT1B1 (2.0)	DMRT1 (1.6)	ATM (1.5)	SYNE1 (1.5)	CDC42 (1.5)	CD44 (1.3)	SALL1 (1.0)	OBFC1 (1.0)	NPAT (1.0)
MP:0002722	abnormal immune system organ morphology	0.1	0.900598	FOXO1 (2.5)	TNRC6B (1.6)	CD44 (1.6)	HK3 (1.6)	RIC8A (1.5)	NPAT (1.3)	LNX1 (1.1)	SLC38A1 (1.0)	COG6 (1.0)	WNT4 (1.0)
KEGG_ALANINE_ASPARTATE_AND_GLUTAMATE_METABOLISM	KEGG_ALANINE_ASPARTATE_AND_GLUTAMATE_METABOLISM	0.1	0.900598	ACAT1 (2.6)	SLC25A15 (2.4)	SIRT3 (2.2)	WT1-AS (1.6)	ENSG00000258096 (1.6)	LRRC34 (1.5)	SLC38A1 (1.2)	SALL1 (1.2)	SYNE1 (1.1)	LNX1 (0.9)
GO:0048008	platelet-derived growth factor receptor signaling pathway	0.1	0.900598	GREB1 (2.3)	ENSG00000226403 (2.2)	LNX1 (1.9)	MYNN (1.7)	WNT4 (1.6)	ZNF346 (1.5)	WT1-AS (1.4)	DMRT1 (1.3)	UIMC1 (1.2)	OBFC1 (1.1)
ENSG00000169925	BRD3 PPI subnetwork	0.1	0.900598	UIMC1 (2.2)	DMRT1 (2.1)	SCGB1C1 (1.8)	MRPS31 (1.7)	FIP1L1 (1.3)	LINC00339 (1.2)	CDC42 (1.1)	ATM (1.1)	COG6 (1.0)	ZNF346 (1.0)
ENSG00000184216	IRAK1 PPI subnetwork	0.1	0.900598	RIC8A (3.4)	LINC00339 (2.6)	WT1-AS (2.5)	MYNN (2.5)	SIRT3 (2.1)	CDC42-IT1 (1.8)	PSMD13 (1.5)	HK3 (1.4)	CD44 (1.4)	BET1L (1.4)
GO:0071339	MLL1 complex	0.1	0.900598	MRPS31 (2.8)	DMRT1 (2.0)	COG6 (1.9)	UIMC1 (1.7)	LINC00339 (1.4)	LRRC34 (1.4)	NPAT (1.1)	PSMD13 (1.0)	ATM (0.9)	FOXO1 (0.9)
GO:0006488	dolichol-linked oligosaccharide biosynthetic process	0.1	0.900598	COG6 (2.5)	LRRC31 (2.3)	LINC00339 (2.0)	BET1L (2.0)	MYNN (1.4)	LRRC34 (1.2)	CUL5 (1.2)	LNX1 (0.9)	ENSG00000228397 (0.9)	ENSG00000258096 (0.9)
ENSG00000169220	RGS14 PPI subnetwork	0.1	0.900598	CD44 (2.7)	CDC42 (2.5)	SLC38A1 (1.7)	HK3 (1.5)	BET1L (1.5)	ENSG00000226403 (1.4)	SULT1B1 (1.2)	FOXO1 (1.1)	CDC42-IT1 (1.0)	MYNN (0.9)
REACTOME_SRP:DEPENDENT_COTRANSLATIONAL_PROTEIN_TARGETING_TO_MEMBRANE	REACTOME_SRP:DEPENDENT_COTRANSLATIONAL_PROTEIN_TARGETING_TO_MEMBRANE	0.1	0.900598	BET1L (3.1)	COG6 (2.2)	ENSG00000226403 (1.9)	CDC42 (1.8)	MYNN (1.6)	WT1-AS (1.1)	KDELC2 (1.0)	WNT4 (1.0)	C11orf65 (1.0)	GREB1 (1.0)
REACTOME_PHASE_II_CONJUGATION	REACTOME_PHASE_II_CONJUGATION	0.1	0.900598	SULT1B1 (6.6)	SLC25A15 (2.7)	ACAT1 (1.6)	EXPH5 (1.5)	LRRC31 (1.5)	LNX1 (1.3)	OBFC1 (1.0)	LINC00339 (0.9)	ODF3 (0.9)	ENSG00000226403 (0.9)
ENSG00000138081	FBXO11 PPI subnetwork	0.1	0.900598	LRRC34 (1.8)	SALL1 (1.8)	CDC42 (1.4)	GREB1 (1.3)	EXPH5 (1.3)	ACAT1 (1.2)	LNX1 (0.9)	MRPS31 (0.9)	ATM (0.9)	HK3 (0.8)
GO:0016052	carbohydrate catabolic process	0.1	0.900598	SIRT3 (2.3)	HK3 (2.1)	C11orf65 (1.8)	LNX1 (1.5)	COG6 (1.4)	SLC25A15 (1.4)	ACAT1 (1.2)	SYNE1 (1.2)	OBFC1 (1.2)	LRRC34 (1.1)
ENSG00000135775	COG2 PPI subnetwork	0.1	0.900598	COG6 (3.8)	ZNF346 (2.7)	BET1L (2.5)	RIC8A (2.2)	MYNN (2.1)	OBFC1 (1.7)	MRPS31 (1.6)	KANK1 (1.5)	PSMD13 (1.3)	UIMC1 (1.2)
MP:0001125	abnormal oocyte morphology	0.1	0.900598	DMRT1 (4.1)	SLC25A15 (2.7)	GREB1 (2.0)	LINC00339 (1.9)	C11orf65 (1.8)	ZNF346 (1.3)	FOXO1 (1.2)	SALL1 (1.0)	CDC42-IT1 (1.0)	TNRC6B (0.8)
MP:0003725	increased autoantibody level	0.1	0.900598	FOXO1 (1.8)	LRRC34 (1.6)	ZNF346 (1.5)	SLC25A15 (1.3)	HK3 (1.2)	FIP1L1 (1.1)	SLC38A1 (1.0)	KANK1 (1.0)	TERT (1.0)	LRRC31 (0.8)
MP:0000928	incomplete cephalic closure	0.1	0.900598	SALL1 (3.2)	WNT4 (2.9)	KANK1 (2.3)	WT1-AS (2.0)	ENSG00000226403 (1.8)	LRRC34 (1.8)	DMRT1 (1.7)	ENSG00000228397 (1.3)	SCGB1C1 (1.1)	ATM (0.9)
GO:0008202	steroid metabolic process	0.1	0.900598	LRRC31 (2.4)	SULT1B1 (2.2)	SLC25A15 (1.9)	GREB1 (1.7)	DMRT1 (1.3)	LNX1 (1.2)	LINC00339 (1.2)	SCGB1C1 (1.0)	SIRT3 (0.9)	ACAT1 (0.9)
ENSG00000152700	SAR1B PPI subnetwork	0.11	0.900598	COG6 (5.3)	BET1L (3.8)	MYNN (2.0)	SLC25A15 (1.1)	HK3 (1.1)	ZNF346 (1.1)	OBFC1 (1.1)	SULT1B1 (0.9)	PSMD13 (0.9)	KDELC2 (0.9)
GO:0030667	secretory granule membrane	0.11	0.900598	SCGB1C1 (2.7)	CD44 (2.1)	ODF3 (1.9)	SULT1B1 (1.8)	COG6 (1.4)	HK3 (1.3)	DMRT1 (1.1)	BET1L (1.1)	ENSG00000226403 (0.9)	SLC38A1 (0.8)
ENSG00000206283	PFDN6 PPI subnetwork	0.11	0.900598	RIC8A (1.9)	CDC42 (1.9)	UIMC1 (1.9)	ENSG00000228397 (1.6)	OBFC1 (1.6)	GREB1 (1.4)	PSMD13 (1.4)	TERT (1.3)	ATM (1.2)	TNRC6B (1.0)
ENSG00000204220	PFDN6 PPI subnetwork	0.11	0.900598	RIC8A (1.9)	CDC42 (1.9)	UIMC1 (1.9)	ENSG00000228397 (1.6)	OBFC1 (1.6)	GREB1 (1.4)	PSMD13 (1.4)	TERT (1.3)	ATM (1.2)	TNRC6B (1.0)
ENSG00000206211	ENSG00000206211 PPI subnetwork	0.11	0.900598	RIC8A (1.9)	CDC42 (1.9)	UIMC1 (1.9)	ENSG00000228397 (1.6)	OBFC1 (1.6)	GREB1 (1.4)	PSMD13 (1.4)	TERT (1.3)	ATM (1.2)	TNRC6B (1.0)
MP:0003048	abnormal cervical vertebrae morphology	0.11	0.900598	KANK1 (3.3)	SALL1 (2.9)	LNX1 (2.3)	WT1-AS (2.0)	TNRC6B (1.6)	SH3PXD2A (1.6)	ENSG00000226403 (1.3)	FIP1L1 (1.2)	NPAT (1.1)	WNT4 (1.0)
ENSG00000124762	CDKN1A PPI subnetwork	0.11	0.900598	SLC38A2 (2.8)	PSMD13 (1.8)	KDELC2 (1.8)	OBFC1 (1.4)	FOXO1 (1.3)	NPAT (1.3)	UIMC1 (1.2)	ENSG00000184378 (1.1)	ACAT1 (1.0)	LRRC31 (0.9)
ENSG00000085662	AKR1B1 PPI subnetwork	0.11	0.900598	ENSG00000226403 (3.1)	KANK1 (2.7)	ENSG00000258096 (1.9)	CD44 (1.8)	BET1L (1.7)	ENSG00000228397 (1.3)	LNX1 (1.3)	HK3 (1.2)	SYNE1 (1.0)	SULT1B1 (0.9)
GO:0001666	response to hypoxia	0.11	0.900598	SLC38A1 (1.6)	FOXO1 (1.3)	C11orf65 (1.2)	SULT1B1 (1.1)	KANK1 (1.0)	SCGB1C1 (1.0)	DMRT1 (0.8)	LNX1 (0.8)	ENSG00000184378 (0.8)	CD44 (0.7)
GO:0042446	hormone biosynthetic process	0.11	0.900598	GREB1 (2.6)	WNT4 (1.9)	LRRC31 (1.6)	SULT1B1 (1.4)	ZNF346 (1.2)	SLC38A1 (1.1)	SLC25A15 (0.9)	ENSG00000258096 (0.9)	SALL1 (0.9)	DMRT1 (0.9)
GO:0006890	retrograde vesicle-mediated transport, Golgi to ER	0.11	0.900598	COG6 (5.9)	BET1L (5.0)	ENSG00000258096 (2.7)	ATM (2.3)	RIC8A (1.6)	MYNN (1.5)	CUL5 (1.3)	MRPS31 (1.2)	LINC00339 (1.2)	DMRT1 (0.9)
MP:0003031	acidosis	0.11	0.900598	LRRC31 (3.2)	ZNF346 (2.5)	C11orf65 (1.7)	SALL1 (1.7)	SYNE1 (1.4)	ACAT1 (1.2)	LNX1 (0.8)	COG6 (0.6)	LINC00339 (0.5)	UIMC1 (0.5)
ENSG00000164134	NAA15 PPI subnetwork	0.11	0.900598	PSMD13 (4.8)	DMRT1 (1.2)	MRPS31 (1.1)	UIMC1 (1.1)	FIP1L1 (1.0)	OBFC1 (0.9)	TNRC6B (0.8)	SLC25A15 (0.8)	LNX1 (0.7)	CUL5 (0.6)
MP:0005136	decreased growth hormone level	0.11	0.900598	LNX1 (2.6)	SALL1 (2.5)	ENSG00000258096 (2.1)	SULT1B1 (1.8)	GREB1 (1.4)	WT1-AS (1.2)	FOXO1 (1.1)	TNRC6B (0.9)	DMRT1 (0.7)	ODF3 (0.6)
ENSG00000135213	POM121C PPI subnetwork	0.11	0.900598	NPAT (2.7)	TERT (1.8)	MRPS31 (1.5)	COG6 (1.5)	UIMC1 (1.4)	KANK1 (1.1)	SYNE1 (1.0)	SLC38A1 (1.0)	ATM (1.0)	ENSG00000258096 (0.9)
MP:0000116	abnormal tooth development	0.11	0.900598	SH3PXD2A (2.7)	EXPH5 (1.9)	WNT4 (1.8)	ENSG00000228397 (1.8)	FOXO1 (1.7)	CD44 (1.6)	LINC00339 (1.5)	KANK1 (1.1)	ZNF346 (1.0)	LNX1 (0.8)
MP:0008734	decreased susceptibility to endotoxin shock	0.11	0.900598	CD44 (3.3)	KANK1 (2.0)	HK3 (2.0)	SULT1B1 (1.9)	ENSG00000226403 (1.5)	LNX1 (0.7)	KDELC2 (0.7)	ENSG00000184378 (0.6)	OBFC1 (0.5)	DMRT1 (0.4)
ENSG00000182195	LDOC1 PPI subnetwork	0.11	0.900598	GREB1 (2.7)	ZNF346 (1.8)	MYNN (1.6)	OBFC1 (1.5)	UIMC1 (1.5)	SALL1 (1.4)	FOXO1 (1.3)	FIP1L1 (1.2)	SLC38A1 (1.1)	RIC8A (1.1)
REACTOME_M_PHASE	REACTOME_M_PHASE	0.11	0.900598	NPAT (2.2)	ATM (1.6)	KDELC2 (1.4)	ACAT1 (1.2)	SLC38A2 (0.8)	LINC00339 (0.8)	COG6 (0.8)	ZNF346 (0.7)	CUL5 (0.6)	SIRT3 (0.6)
MP:0008410	increased cellular sensitivity to ultraviolet irradiation	0.11	0.900598	UIMC1 (2.8)	ZNF346 (2.0)	LNX1 (2.0)	SLC38A2 (2.0)	ATM (1.8)	MYNN (1.6)	RIC8A (1.5)	MRPS31 (1.4)	NPAT (1.4)	ENSG00000184378 (1.4)
ENSG00000172216	CEBPB PPI subnetwork	0.11	0.900598	FOXO1 (2.1)	TNRC6B (2.1)	SLC38A2 (2.1)	SH3PXD2A (1.7)	TERT (1.5)	ZNF346 (1.3)	CD44 (1.3)	CDC42-IT1 (1.2)	CUL5 (1.1)	GREB1 (1.0)
ENSG00000141252	VPS53 PPI subnetwork	0.11	0.900598	LRRC31 (2.4)	COG6 (2.2)	FIP1L1 (1.8)	MYNN (1.6)	LNX1 (1.5)	HK3 (1.4)	SH3PXD2A (1.3)	GREB1 (1.2)	ENSG00000184378 (1.0)	CUL5 (1.0)
ENSG00000121653	MAPK8IP1 PPI subnetwork	0.11	0.900598	SALL1 (2.6)	CD44 (2.2)	WT1-AS (2.0)	BET1L (1.6)	LRRC31 (1.1)	HK3 (1.0)	GREB1 (0.9)	ZNF346 (0.9)	EXPH5 (0.9)	SLC38A1 (0.7)
MP:0009356	decreased liver triglyceride level	0.11	0.900598	SLC25A15 (2.2)	ACAT1 (1.9)	KANK1 (1.7)	LRRC31 (1.6)	TERT (1.6)	SH3PXD2A (1.5)	LRRC34 (1.1)	SULT1B1 (1.1)	DMRT1 (1.1)	SIRT3 (1.1)
GO:0048863	stem cell differentiation	0.11	0.900598	SALL1 (3.0)	LRRC34 (1.6)	DMRT1 (1.5)	FIP1L1 (1.2)	TNRC6B (1.2)	TERT (0.9)	WT1-AS (0.8)	SH3PXD2A (0.7)	SLC25A15 (0.7)	KANK1 (0.7)
GO:0009755	hormone-mediated signaling pathway	0.11	0.900598	GREB1 (3.3)	LRRC31 (1.9)	LNX1 (1.8)	SIRT3 (1.7)	LRRC34 (1.5)	SLC25A15 (1.4)	SULT1B1 (1.3)	TERT (1.3)	CDC42-IT1 (1.3)	FOXO1 (1.1)
GO:0004713	protein tyrosine kinase activity	0.11	0.900598	SYNE1 (1.5)	SLC38A2 (1.5)	TNRC6B (1.4)	SH3PXD2A (1.3)	UIMC1 (1.1)	EXPH5 (1.0)	SULT1B1 (0.9)	ENSG00000228397 (0.9)	LRRC34 (0.8)	CD44 (0.8)
GO:0006325	chromatin organization	0.11	0.900598	TNRC6B (2.9)	UIMC1 (2.3)	FIP1L1 (2.1)	NPAT (2.0)	ENSG00000228397 (1.6)	ZNF346 (1.6)	TERT (1.3)	ATM (1.2)	DMRT1 (1.1)	ENSG00000184378 (1.1)
MP:0002786	abnormal Leydig cell morphology	0.11	0.900598	DMRT1 (3.0)	WNT4 (2.8)	GREB1 (2.7)	WT1-AS (2.1)	SULT1B1 (1.5)	C11orf65 (1.4)	ODF3 (1.3)	SLC25A15 (1.2)	LRRC34 (1.2)	EXPH5 (1.1)
ENSG00000185386	MAPK11 PPI subnetwork	0.11	0.900598	TNRC6B (2.3)	CD44 (2.2)	SLC38A2 (1.5)	SIRT3 (1.4)	LRRC31 (1.3)	ZNF346 (1.3)	CDC42-IT1 (1.1)	ENSG00000228397 (1.1)	SH3PXD2A (1.1)	MYNN (1.0)
GO:0003712	transcription cofactor activity	0.11	0.900598	TNRC6B (3.2)	FIP1L1 (2.7)	UIMC1 (2.4)	SLC38A2 (2.2)	MYNN (1.9)	ZNF346 (1.6)	FOXO1 (1.5)	MRPS31 (1.5)	NPAT (1.0)	WNT4 (0.9)
GO:0060249	anatomical structure homeostasis	0.11	0.900598	ENSG00000228397 (3.4)	TERT (2.2)	OBFC1 (2.1)	ENSG00000226403 (1.9)	NPAT (1.7)	LRRC31 (1.7)	ATM (1.6)	SCGB1C1 (1.3)	KDELC2 (1.2)	SYNE1 (1.1)
ENSG00000034693	PEX3 PPI subnetwork	0.11	0.900598	MRPS31 (2.7)	TERT (1.5)	ZNF346 (1.3)	CUL5 (1.3)	MYNN (1.3)	SIRT3 (1.2)	EXPH5 (0.9)	COG6 (0.9)	SULT1B1 (0.9)	SH3PXD2A (0.7)
KEGG_SULFUR_METABOLISM	KEGG_SULFUR_METABOLISM	0.11	0.900598	SULT1B1 (5.3)	LINC00339 (2.9)	SLC25A15 (2.4)	KANK1 (2.1)	LNX1 (1.9)	ENSG00000258096 (1.9)	ENSG00000226403 (1.8)	SYNE1 (1.6)	HK3 (1.5)	COG6 (1.4)
GO:0003690	double-stranded DNA binding	0.11	0.900598	WNT4 (2.8)	MRPS31 (2.4)	SLC38A2 (2.0)	LINC00339 (1.5)	UIMC1 (1.5)	NPAT (1.5)	FOXO1 (1.4)	ATM (1.3)	FIP1L1 (1.2)	ENSG00000258096 (1.1)
MP:0004905	decreased uterus weight	0.11	0.900598	FOXO1 (4.4)	GREB1 (3.1)	SH3PXD2A (1.7)	SLC25A15 (1.6)	LNX1 (1.4)	EXPH5 (1.2)	LRRC31 (1.1)	MRPS31 (1.0)	SLC38A2 (0.9)	SULT1B1 (0.9)
ENSG00000095564	BTAF1 PPI subnetwork	0.11	0.900598	SCGB1C1 (3.6)	DMRT1 (2.2)	ATM (2.0)	FIP1L1 (2.0)	TNRC6B (1.7)	ENSG00000228397 (1.6)	NPAT (1.4)	SLC38A1 (1.3)	ENSG00000258096 (1.2)	CUL5 (1.0)
MP:0004418	small parietal bone	0.11	0.900598	WNT4 (3.0)	SALL1 (1.9)	EXPH5 (1.4)	SLC38A2 (1.3)	GREB1 (1.3)	KANK1 (1.2)	ZNF346 (1.1)	FOXO1 (1.0)	OBFC1 (0.8)	ENSG00000258096 (0.8)
GO:0051650	establishment of vesicle localization	0.11	0.900598	COG6 (5.3)	BET1L (5.1)	ATM (1.5)	RIC8A (1.4)	ZNF346 (1.2)	MYNN (1.1)	ACAT1 (1.0)	ENSG00000184378 (1.0)	CDC42-IT1 (1.0)	C11orf65 (1.0)
MP:0004772	abnormal bile secretion	0.11	0.900598	SLC25A15 (3.4)	SULT1B1 (2.8)	ACAT1 (1.5)	SALL1 (1.4)	LNX1 (1.2)	ODF3 (0.7)	SIRT3 (0.7)	C11orf65 (0.7)	CDC42-IT1 (0.6)	ATM (0.5)
REACTOME_PI3K_EVENTS_IN_ERBB2_SIGNALING	REACTOME_PI3K_EVENTS_IN_ERBB2_SIGNALING	0.11	0.900598	FOXO1 (2.9)	MYNN (2.2)	TNRC6B (2.0)	RIC8A (2.0)	BET1L (2.0)	ENSG00000258096 (1.5)	LRRC31 (1.3)	SLC25A15 (1.3)	SLC38A2 (1.2)	SIRT3 (1.2)
GO:0043967	histone H4 acetylation	0.11	0.900598	LINC00339 (2.6)	TNRC6B (2.0)	SLC38A2 (1.8)	MYNN (1.5)	TERT (1.2)	CDC42-IT1 (1.1)	UIMC1 (1.1)	OBFC1 (1.0)	SLC38A1 (1.0)	FIP1L1 (1.0)
ENSG00000168061	SAC3D1 PPI subnetwork	0.11	0.900598	UIMC1 (2.7)	ATM (2.5)	NPAT (1.8)	CDC42 (1.8)	TERT (1.4)	KDELC2 (1.3)	FIP1L1 (1.3)	CUL5 (1.2)	PSMD13 (1.2)	LINC00339 (1.2)
ENSG00000130024	PHF10 PPI subnetwork	0.11	0.900598	TNRC6B (2.8)	FIP1L1 (1.7)	CUL5 (1.5)	DMRT1 (1.4)	SALL1 (1.2)	SCGB1C1 (1.0)	TERT (1.0)	CDC42-IT1 (0.8)	COG6 (0.7)	SULT1B1 (0.7)
ENSG00000155868	MED7 PPI subnetwork	0.11	0.900598	MRPS31 (2.6)	ZNF346 (2.3)	UIMC1 (2.0)	FIP1L1 (1.9)	BET1L (1.5)	CUL5 (1.4)	COG6 (1.3)	RIC8A (1.2)	NPAT (1.2)	ODF3 (1.1)
MP:0001663	abnormal digestive system physiology	0.11	0.900598	SULT1B1 (4.2)	LRRC31 (3.7)	LNX1 (2.8)	CD44 (2.0)	ENSG00000228397 (1.2)	WNT4 (1.1)	GREB1 (1.0)	TNRC6B (1.0)	SALL1 (0.8)	EXPH5 (0.6)
ENSG00000008952	SEC62 PPI subnetwork	0.11	0.900598	MYNN (2.5)	BET1L (2.1)	LRRC31 (1.7)	RIC8A (1.3)	ZNF346 (1.3)	PSMD13 (1.2)	UIMC1 (1.1)	MRPS31 (0.9)	ENSG00000184378 (0.8)	HK3 (0.8)
ENSG00000105829	BET1 PPI subnetwork	0.11	0.900598	COG6 (6.6)	BET1L (6.4)	RIC8A (2.3)	PSMD13 (2.2)	ACAT1 (2.0)	MYNN (1.8)	CUL5 (1.7)	LRRC31 (1.2)	SIRT3 (1.2)	ZNF346 (1.2)
ENSG00000206340	C4A PPI subnetwork	0.11	0.900598	TNRC6B (1.9)	SLC25A15 (1.7)	SALL1 (1.2)	GREB1 (1.1)	WNT4 (0.9)	SULT1B1 (0.9)	LNX1 (0.8)	UIMC1 (0.5)	WT1-AS (0.5)	ENSG00000184378 (0.5)
GO:0006776	vitamin A metabolic process	0.11	0.900598	TERT (3.3)	EXPH5 (2.1)	SULT1B1 (1.8)	LRRC34 (1.7)	WNT4 (1.4)	ODF3 (1.4)	LINC00339 (1.3)	OBFC1 (1.1)	ZNF346 (0.9)	ENSG00000184378 (0.6)
GO:0006312	mitotic recombination	0.11	0.900598	OBFC1 (3.7)	ATM (3.2)	NPAT (3.0)	LINC00339 (3.0)	TERT (2.8)	KDELC2 (2.5)	ZNF346 (2.2)	ENSG00000228397 (1.9)	UIMC1 (1.6)	MYNN (1.4)
ENSG00000198053	SIRPA PPI subnetwork	0.11	0.900598	CD44 (3.6)	ENSG00000226403 (1.9)	KANK1 (1.5)	CDC42-IT1 (1.3)	ACAT1 (1.3)	MYNN (1.3)	SLC38A1 (1.3)	SLC38A2 (1.1)	CUL5 (1.0)	BET1L (1.0)
GO:0005496	steroid binding	0.11	0.900598	GREB1 (3.8)	SULT1B1 (2.9)	LRRC31 (2.8)	SLC25A15 (2.0)	WNT4 (1.9)	SALL1 (1.6)	FOXO1 (1.6)	ACAT1 (1.4)	SIRT3 (1.3)	ENSG00000258096 (0.9)
GO:0008175	tRNA methyltransferase activity	0.11	0.900598	KDELC2 (1.8)	LRRC34 (1.6)	TERT (1.4)	WT1-AS (1.4)	SIRT3 (1.4)	RIC8A (1.3)	ENSG00000226403 (1.3)	ATM (1.3)	COG6 (1.2)	SLC25A15 (1.1)
GO:0006691	leukotriene metabolic process	0.11	0.900598	HK3 (2.3)	ENSG00000226403 (2.1)	SCGB1C1 (2.0)	SYNE1 (1.6)	OBFC1 (1.5)	GREB1 (1.3)	LNX1 (1.2)	SULT1B1 (1.1)	COG6 (1.1)	LINC00339 (1.0)
GO:0043449	cellular alkene metabolic process	0.11	0.900598	HK3 (2.3)	ENSG00000226403 (2.1)	SCGB1C1 (2.0)	SYNE1 (1.6)	OBFC1 (1.5)	GREB1 (1.3)	LNX1 (1.2)	SULT1B1 (1.1)	COG6 (1.1)	LINC00339 (1.0)
GO:0071825	protein-lipid complex subunit organization	0.11	0.900598	CDC42-IT1 (2.6)	SLC25A15 (2.4)	SIRT3 (1.5)	SCGB1C1 (1.3)	ENSG00000226403 (1.3)	LRRC31 (1.2)	LNX1 (1.1)	LRRC34 (0.9)	ENSG00000258096 (0.8)	UIMC1 (0.8)
GO:0071827	plasma lipoprotein particle organization	0.11	0.900598	CDC42-IT1 (2.6)	SLC25A15 (2.4)	SIRT3 (1.5)	SCGB1C1 (1.3)	ENSG00000226403 (1.3)	LRRC31 (1.2)	LNX1 (1.1)	LRRC34 (0.9)	ENSG00000258096 (0.8)	UIMC1 (0.8)
GO:0006261	DNA-dependent DNA replication	0.11	0.900598	NPAT (4.2)	OBFC1 (3.3)	KDELC2 (3.2)	ATM (2.9)	TERT (2.2)	ENSG00000228397 (1.8)	UIMC1 (1.8)	ENSG00000258096 (1.4)	FIP1L1 (1.3)	ZNF346 (1.2)
GO:0007129	synapsis	0.11	0.900598	DMRT1 (3.1)	C11orf65 (2.1)	ATM (2.0)	KDELC2 (1.9)	ENSG00000184378 (1.9)	LRRC34 (1.7)	TERT (1.5)	ZNF346 (1.4)	COG6 (1.3)	UIMC1 (1.1)
GO:0051149	positive regulation of muscle cell differentiation	0.11	0.900598	CDC42-IT1 (3.5)	SULT1B1 (1.9)	LINC00339 (1.8)	ZNF346 (1.4)	RIC8A (1.4)	SYNE1 (1.3)	FOXO1 (1.2)	ENSG00000226403 (1.2)	OBFC1 (1.1)	BET1L (0.9)
GO:0010972	negative regulation of G2/M transition of mitotic cell cycle	0.11	0.900598	NPAT (3.0)	TERT (2.1)	OBFC1 (1.9)	CUL5 (1.6)	UIMC1 (1.5)	SYNE1 (1.3)	ZNF346 (1.3)	ENSG00000184378 (1.1)	ATM (1.1)	KDELC2 (1.0)
MP:0005087	decreased acute inflammation	0.11	0.900598	HK3 (3.8)	ENSG00000226403 (1.6)	GREB1 (1.5)	LRRC34 (1.3)	COG6 (1.2)	OBFC1 (1.2)	SLC25A15 (1.0)	BET1L (0.9)	LINC00339 (0.8)	SALL1 (0.7)
ENSG00000137413	TAF8 PPI subnetwork	0.11	0.900598	UIMC1 (3.2)	MYNN (2.0)	CDC42-IT1 (1.8)	DMRT1 (1.8)	MRPS31 (1.7)	RIC8A (1.6)	LINC00339 (1.4)	ENSG00000226403 (1.4)	SLC25A15 (1.3)	NPAT (1.3)
GO:0032526	response to retinoic acid	0.11	0.900598	WNT4 (3.2)	DMRT1 (2.8)	CDC42-IT1 (2.1)	LRRC34 (1.2)	BET1L (0.8)	ATM (0.8)	ENSG00000258096 (0.8)	WT1-AS (0.6)	OBFC1 (0.6)	ENSG00000226403 (0.5)
MP:0002417	abnormal megakaryocyte morphology	0.11	0.900598	LNX1 (1.7)	SLC25A15 (1.6)	LRRC31 (1.5)	LRRC34 (1.5)	HK3 (1.4)	UIMC1 (1.4)	WT1-AS (1.4)	CD44 (1.3)	SULT1B1 (1.3)	WNT4 (1.0)
MP:0002401	abnormal lymphopoiesis	0.11	0.900598	FOXO1 (3.0)	TERT (2.9)	RIC8A (1.7)	LRRC34 (1.7)	HK3 (1.5)	SLC38A1 (1.2)	SYNE1 (1.1)	C11orf65 (1.1)	CD44 (1.1)	TNRC6B (1.1)
MP:0001132	absent mature ovarian follicles	0.11	0.900598	GREB1 (3.2)	WT1-AS (2.1)	FOXO1 (1.6)	TERT (1.1)	SALL1 (1.1)	KANK1 (1.0)	C11orf65 (1.0)	ENSG00000258096 (1.0)	ACAT1 (1.0)	ODF3 (1.0)
GO:0048754	branching morphogenesis of a tube	0.11	0.900598	SALL1 (3.5)	WNT4 (3.0)	WT1-AS (2.8)	GREB1 (2.8)	SH3PXD2A (2.7)	EXPH5 (2.0)	KANK1 (1.9)	ATM (1.5)	ENSG00000228397 (1.3)	DMRT1 (1.2)
MP:0008058	abnormal DNA repair	0.11	0.900598	MRPS31 (3.6)	NPAT (3.1)	ATM (2.8)	TERT (2.8)	UIMC1 (2.3)	OBFC1 (2.3)	KDELC2 (1.5)	ZNF346 (1.4)	DMRT1 (1.2)	FIP1L1 (0.9)
ENSG00000008056	SYN1 PPI subnetwork	0.11	0.900598	CDC42 (2.2)	RIC8A (2.1)	CD44 (1.5)	CDC42-IT1 (1.4)	SALL1 (1.3)	SLC38A1 (1.2)	SYNE1 (1.0)	ENSG00000226403 (0.9)	SH3PXD2A (0.8)	ATM (0.7)
GO:0048284	organelle fusion	0.11	0.900598	LINC00339 (3.1)	COG6 (3.0)	MYNN (2.8)	ENSG00000228397 (1.6)	C11orf65 (1.3)	BET1L (1.2)	ZNF346 (1.2)	CDC42 (1.1)	CDC42-IT1 (1.0)	UIMC1 (0.9)
MP:0003070	increased vascular permeability	0.11	0.900598	SH3PXD2A (2.6)	CD44 (2.5)	ENSG00000184378 (2.2)	LNX1 (1.7)	OBFC1 (1.7)	TNRC6B (1.1)	WNT4 (1.0)	SCGB1C1 (1.0)	ACAT1 (0.9)	FIP1L1 (0.8)
ENSG00000177425	PAWR PPI subnetwork	0.11	0.900598	WT1-AS (6.5)	SULT1B1 (2.3)	SLC38A1 (2.1)	SALL1 (1.7)	RIC8A (1.6)	KANK1 (1.5)	CDC42 (1.5)	WNT4 (1.2)	LRRC31 (1.2)	SCGB1C1 (1.2)
ENSG00000145675	PIK3R1 PPI subnetwork	0.11	0.900598	HK3 (2.3)	KANK1 (2.1)	SLC38A1 (1.8)	FOXO1 (1.7)	WT1-AS (1.2)	SYNE1 (1.0)	TERT (0.8)	SULT1B1 (0.7)	SH3PXD2A (0.7)	RIC8A (0.6)
GO:0070646	protein modification by small protein removal	0.11	0.900598	CUL5 (3.0)	MYNN (2.7)	ZNF346 (2.4)	COG6 (1.5)	RIC8A (1.4)	C11orf65 (1.4)	LNX1 (1.3)	UIMC1 (1.3)	ENSG00000226403 (1.2)	NPAT (1.2)
ENSG00000173757	STAT5B PPI subnetwork	0.11	0.900598	FOXO1 (3.0)	TNRC6B (2.7)	LNX1 (1.8)	ENSG00000184378 (1.7)	FIP1L1 (1.3)	CD44 (1.3)	WNT4 (1.3)	C11orf65 (1.1)	TERT (0.7)	NPAT (0.6)
GO:0000301	retrograde transport, vesicle recycling within Golgi	0.11	0.900598	COG6 (3.4)	CUL5 (2.8)	ENSG00000184378 (2.4)	BET1L (2.1)	CDC42-IT1 (1.8)	MYNN (1.6)	ENSG00000258096 (1.5)	ZNF346 (1.4)	SYNE1 (1.2)	ATM (1.1)
MP:0000711	thymus cortex hypoplasia	0.11	0.900598	DMRT1 (2.0)	HK3 (1.9)	CUL5 (1.7)	ODF3 (1.6)	ENSG00000226403 (1.5)	TNRC6B (1.5)	TERT (1.2)	SCGB1C1 (1.2)	FOXO1 (1.2)	ENSG00000228397 (1.1)
ENSG00000153107	ANAPC1 PPI subnetwork	0.11	0.900598	MRPS31 (1.9)	COG6 (1.8)	LRRC34 (1.5)	OBFC1 (1.4)	FIP1L1 (1.2)	ACAT1 (1.2)	KDELC2 (1.1)	LINC00339 (1.0)	UIMC1 (0.9)	LNX1 (0.8)
GO:0000784	nuclear chromosome, telomeric region	0.11	0.900598	OBFC1 (3.8)	TERT (2.3)	ATM (2.2)	ENSG00000228397 (1.8)	SYNE1 (1.8)	TNRC6B (1.7)	NPAT (1.6)	SLC38A1 (1.4)	ZNF346 (1.2)	UIMC1 (1.1)
MP:0002962	increased urine protein level	0.11	0.900598	WT1-AS (4.3)	EXPH5 (1.9)	ENSG00000226403 (1.8)	FOXO1 (1.7)	BET1L (1.7)	SYNE1 (1.6)	WNT4 (1.5)	RIC8A (1.4)	SLC38A1 (1.4)	KDELC2 (1.1)
ENSG00000104856	RELB PPI subnetwork	0.11	0.900598	CDC42-IT1 (2.0)	PSMD13 (2.0)	ENSG00000184378 (1.8)	SH3PXD2A (1.6)	CDC42 (1.5)	KDELC2 (1.4)	FIP1L1 (1.3)	RIC8A (1.2)	TNRC6B (1.2)	LINC00339 (0.9)
GO:0048934	peripheral nervous system neuron differentiation	0.11	0.900598	ENSG00000228397 (3.4)	SLC38A1 (1.6)	SALL1 (1.5)	LRRC34 (1.5)	OBFC1 (1.4)	LRRC31 (1.4)	GREB1 (1.2)	C11orf65 (1.1)	MRPS31 (1.0)	DMRT1 (1.0)
GO:0048935	peripheral nervous system neuron development	0.11	0.900598	ENSG00000228397 (3.4)	SLC38A1 (1.6)	SALL1 (1.5)	LRRC34 (1.5)	OBFC1 (1.4)	LRRC31 (1.4)	GREB1 (1.2)	C11orf65 (1.1)	MRPS31 (1.0)	DMRT1 (1.0)
GO:0006383	transcription from RNA polymerase III promoter	0.11	0.900598	ZNF346 (2.9)	RIC8A (2.6)	TERT (2.3)	BET1L (1.9)	NPAT (1.6)	ENSG00000226403 (1.1)	DMRT1 (0.9)	ENSG00000184378 (0.8)	MYNN (0.7)	ATM (0.7)
GO:0048193	Golgi vesicle transport	0.11	0.900598	COG6 (6.9)	BET1L (5.1)	MYNN (1.9)	CUL5 (1.6)	ATM (1.3)	RIC8A (1.2)	OBFC1 (1.1)	UIMC1 (1.0)	LINC00339 (1.0)	CDC42-IT1 (1.0)
MP:0000428	abnormal craniofacial morphology	0.11	0.900598	SH3PXD2A (2.0)	WNT4 (1.8)	LRRC34 (1.5)	SALL1 (1.5)	KANK1 (1.4)	KDELC2 (1.1)	SCGB1C1 (1.0)	TNRC6B (0.9)	TERT (0.8)	FOXO1 (0.7)
MP:0000270	abnormal heart tube morphology	0.11	0.900598	SALL1 (3.8)	WT1-AS (2.0)	GREB1 (1.8)	WNT4 (1.8)	ENSG00000228397 (1.4)	TNRC6B (1.1)	KANK1 (1.1)	ENSG00000226403 (1.1)	SULT1B1 (1.1)	SLC38A1 (0.9)
GO:0003735	structural constituent of ribosome	0.11	0.900598	MRPS31 (3.7)	SIRT3 (1.3)	OBFC1 (1.2)	WT1-AS (1.1)	LINC00339 (1.0)	MYNN (0.9)	ENSG00000226403 (0.8)	PSMD13 (0.7)	ACAT1 (0.7)	SULT1B1 (0.7)
REACTOME_G1S_DNA_DAMAGE_CHECKPOINTS	REACTOME_G1S_DNA_DAMAGE_CHECKPOINTS	0.11	0.900598	PSMD13 (5.7)	CDC42 (2.2)	MRPS31 (1.4)	ENSG00000228397 (1.2)	MYNN (1.2)	WNT4 (1.1)	BET1L (1.0)	CUL5 (1.0)	LINC00339 (0.9)	ZNF346 (0.9)
ENSG00000162191	UBXN1 PPI subnetwork	0.11	0.900598	LINC00339 (2.8)	CUL5 (2.0)	KANK1 (2.0)	FIP1L1 (1.9)	PSMD13 (1.7)	EXPH5 (1.6)	CDC42 (1.6)	SLC38A2 (1.5)	MYNN (1.5)	CDC42-IT1 (1.3)
MP:0002118	abnormal lipid homeostasis	0.11	0.900598	FOXO1 (3.0)	SLC25A15 (2.9)	ACAT1 (2.9)	KANK1 (1.6)	SH3PXD2A (1.5)	SIRT3 (1.4)	MRPS31 (1.2)	ENSG00000228397 (0.8)	SULT1B1 (0.7)	HK3 (0.5)
GO:0072075	metanephric mesenchyme development	0.11	0.900598	WT1-AS (7.5)	WNT4 (2.4)	SLC38A1 (1.6)	TERT (1.6)	SCGB1C1 (1.5)	SLC38A2 (1.4)	ZNF346 (1.2)	LRRC34 (1.2)	CDC42-IT1 (1.2)	LINC00339 (0.9)
GO:0009309	amine biosynthetic process	0.11	0.900598	SLC25A15 (2.4)	SIRT3 (1.6)	ACAT1 (1.6)	CDC42-IT1 (1.4)	SULT1B1 (1.2)	SLC38A2 (1.1)	SLC38A1 (1.1)	DMRT1 (0.9)	ENSG00000226403 (0.9)	LRRC34 (0.8)
GO:0000803	sex chromosome	0.11	0.900598	NPAT (2.9)	DMRT1 (2.5)	CUL5 (2.4)	UIMC1 (2.2)	SALL1 (1.5)	ZNF346 (1.5)	SH3PXD2A (1.4)	LRRC31 (1.3)	FIP1L1 (0.9)	SULT1B1 (0.7)
GO:0002062	chondrocyte differentiation	0.11	0.900598	KANK1 (2.6)	WNT4 (2.3)	ENSG00000228397 (2.1)	LNX1 (1.9)	FOXO1 (1.4)	BET1L (1.3)	SH3PXD2A (1.3)	TNRC6B (0.7)	SLC38A1 (0.7)	SALL1 (0.6)
ENSG00000103275	UBE2I PPI subnetwork	0.11	0.900598	FIP1L1 (2.1)	TNRC6B (2.0)	LNX1 (1.6)	DMRT1 (1.6)	TERT (1.6)	NPAT (1.4)	WNT4 (1.4)	WT1-AS (1.3)	SLC38A2 (1.3)	ENSG00000228397 (1.2)
GO:0050820	positive regulation of coagulation	0.11	0.900598	SLC25A15 (1.6)	ENSG00000226403 (1.2)	LINC00339 (1.1)	ODF3 (1.1)	C11orf65 (1.0)	LNX1 (1.0)	TERT (1.0)	LRRC34 (0.9)	CUL5 (0.8)	CD44 (0.7)
GO:0046365	monosaccharide catabolic process	0.11	0.900598	C11orf65 (2.3)	SIRT3 (1.8)	OBFC1 (1.5)	ODF3 (1.5)	LNX1 (1.3)	COG6 (1.3)	LRRC34 (1.3)	SLC25A15 (1.2)	ACAT1 (1.0)	ENSG00000184378 (0.9)
ENSG00000117153	KLHL12 PPI subnetwork	0.11	0.900598	CUL5 (4.2)	MYNN (3.6)	LINC00339 (2.8)	FIP1L1 (2.6)	LNX1 (1.4)	SULT1B1 (1.3)	TNRC6B (1.3)	NPAT (1.2)	CDC42 (1.1)	KANK1 (1.1)
MP:0005312	pericardial effusion	0.11	0.900598	TNRC6B (2.7)	SLC38A1 (2.3)	SLC38A2 (1.9)	ENSG00000226403 (1.8)	SYNE1 (1.6)	KANK1 (1.1)	CD44 (1.1)	CDC42 (1.0)	NPAT (1.0)	SALL1 (0.7)
GO:0030522	intracellular receptor mediated signaling pathway	0.11	0.900598	TNRC6B (3.2)	GREB1 (2.7)	ENSG00000184378 (2.6)	LRRC34 (1.6)	FOXO1 (1.6)	SLC38A2 (1.4)	SH3PXD2A (1.3)	LINC00339 (1.3)	WT1-AS (1.2)	CDC42-IT1 (1.2)
ENSG00000206346	DOM3Z PPI subnetwork	0.11	0.900598	TNRC6B (2.0)	PSMD13 (1.8)	FOXO1 (1.8)	ENSG00000228397 (1.4)	SALL1 (1.2)	BET1L (1.2)	LINC00339 (1.2)	COG6 (1.1)	ZNF346 (1.0)	SULT1B1 (0.9)
ENSG00000204348	DOM3Z PPI subnetwork	0.11	0.900598	TNRC6B (2.0)	PSMD13 (1.8)	FOXO1 (1.8)	ENSG00000228397 (1.4)	SALL1 (1.2)	BET1L (1.2)	LINC00339 (1.2)	COG6 (1.1)	ZNF346 (1.0)	SULT1B1 (0.9)
ENSG00000206266	ENSG00000206266 PPI subnetwork	0.11	0.900598	TNRC6B (2.0)	PSMD13 (1.8)	FOXO1 (1.8)	ENSG00000228397 (1.4)	SALL1 (1.2)	BET1L (1.2)	LINC00339 (1.2)	COG6 (1.1)	ZNF346 (1.0)	SULT1B1 (0.9)
MP:0011098	complete embryonic lethality during organogenesis	0.11	0.900598	TNRC6B (2.0)	KANK1 (1.9)	SALL1 (1.9)	ATM (1.4)	SH3PXD2A (1.3)	UIMC1 (1.3)	FOXO1 (1.0)	GREB1 (0.8)	SLC38A2 (0.7)	NPAT (0.7)
ENSG00000167110	GOLGA2 PPI subnetwork	0.11	0.900598	COG6 (3.4)	KANK1 (2.6)	BET1L (1.9)	ENSG00000226403 (1.8)	ENSG00000258096 (1.7)	EXPH5 (1.3)	MYNN (1.3)	SLC38A1 (1.3)	SYNE1 (1.1)	LNX1 (1.0)
MP:0001935	decreased litter size	0.11	0.900598	GREB1 (3.0)	LRRC34 (2.9)	KANK1 (2.5)	LNX1 (2.0)	SULT1B1 (1.8)	FOXO1 (1.3)	ODF3 (1.3)	WNT4 (1.3)	SLC38A2 (1.1)	ENSG00000228397 (1.0)
GO:0000289	nuclear-transcribed mRNA poly(A) tail shortening	0.11	0.900598	MYNN (4.0)	UIMC1 (3.4)	LINC00339 (2.6)	COG6 (2.1)	LRRC31 (2.0)	ENSG00000228397 (1.6)	C11orf65 (1.4)	ENSG00000258096 (1.2)	SULT1B1 (1.0)	LRRC34 (0.9)
ENSG00000132646	PCNA PPI subnetwork	0.11	0.900598	NPAT (2.7)	OBFC1 (2.3)	KDELC2 (2.0)	UIMC1 (2.0)	TERT (1.7)	LINC00339 (1.4)	FIP1L1 (1.3)	MRPS31 (1.2)	SLC38A2 (1.1)	ZNF346 (1.0)
MP:0000280	thin ventricular wall	0.11	0.900598	TNRC6B (2.0)	KANK1 (1.9)	SLC38A2 (1.9)	ENSG00000184378 (1.4)	ENSG00000258096 (1.3)	FOXO1 (1.3)	SIRT3 (1.1)	RIC8A (1.0)	MRPS31 (1.0)	SULT1B1 (0.9)
ENSG00000206429	ENSG00000206429 PPI subnetwork	0.11	0.900598	KANK1 (2.3)	TNRC6B (1.8)	ENSG00000184378 (1.8)	RIC8A (1.7)	SLC38A1 (1.7)	SCGB1C1 (1.5)	BET1L (1.5)	ATM (1.2)	SLC25A15 (1.1)	ENSG00000226403 (1.1)
ENSG00000206502	ZNRD1 PPI subnetwork	0.11	0.900598	KANK1 (2.3)	TNRC6B (1.8)	ENSG00000184378 (1.8)	RIC8A (1.7)	SLC38A1 (1.7)	SCGB1C1 (1.5)	BET1L (1.5)	ATM (1.2)	SLC25A15 (1.1)	ENSG00000226403 (1.1)
ENSG00000066379	ZNRD1 PPI subnetwork	0.11	0.900598	KANK1 (2.3)	TNRC6B (1.8)	ENSG00000184378 (1.8)	RIC8A (1.7)	SLC38A1 (1.7)	SCGB1C1 (1.5)	BET1L (1.5)	ATM (1.2)	SLC25A15 (1.1)	ENSG00000226403 (1.1)
ENSG00000107819	SFXN3 PPI subnetwork	0.11	0.900598	ENSG00000184378 (3.8)	RIC8A (2.4)	CD44 (2.3)	PSMD13 (2.1)	CDC42-IT1 (1.3)	ENSG00000226403 (1.2)	SIRT3 (1.2)	KANK1 (1.2)	KDELC2 (1.1)	SLC38A2 (1.1)
GO:0043486	histone exchange	0.11	0.900598	ENSG00000228397 (2.2)	ODF3 (1.9)	KDELC2 (1.7)	NPAT (1.7)	ATM (1.6)	ENSG00000226403 (1.5)	C11orf65 (1.3)	CUL5 (1.2)	DMRT1 (1.1)	ZNF346 (1.1)
GO:0016458	gene silencing	0.11	0.900598	C11orf65 (4.0)	DMRT1 (2.6)	TERT (1.9)	ODF3 (1.6)	TNRC6B (1.2)	ZNF346 (1.2)	ENSG00000228397 (1.1)	RIC8A (1.1)	ENSG00000184378 (1.0)	FIP1L1 (1.0)
ENSG00000144554	FANCD2 PPI subnetwork	0.11	0.900598	SIRT3 (3.1)	NPAT (3.1)	TERT (2.9)	CDC42-IT1 (2.4)	KDELC2 (2.4)	ACAT1 (2.2)	RIC8A (1.7)	EXPH5 (1.7)	MYNN (1.3)	OBFC1 (1.2)
MP:0011353	expanded mesangial matrix	0.11	0.900598	WT1-AS (6.4)	ENSG00000226403 (3.0)	ENSG00000258096 (2.7)	SYNE1 (2.4)	WNT4 (1.6)	EXPH5 (1.3)	FOXO1 (1.3)	BET1L (1.1)	KANK1 (1.0)	DMRT1 (0.8)
ENSG00000126522	ASL PPI subnetwork	0.11	0.900598	KANK1 (2.1)	ZNF346 (1.5)	ENSG00000226403 (1.4)	MYNN (1.3)	SLC25A15 (1.3)	OBFC1 (1.2)	NPAT (1.2)	BET1L (1.2)	ENSG00000184378 (1.0)	PSMD13 (1.0)
MP:0000274	enlarged heart	0.11	0.900598	TNRC6B (2.2)	ENSG00000258096 (1.7)	ENSG00000226403 (1.6)	WT1-AS (1.4)	FOXO1 (1.3)	SYNE1 (1.2)	KANK1 (1.1)	GREB1 (0.8)	WNT4 (0.7)	TERT (0.6)
GO:0003950	NAD+ ADP-ribosyltransferase activity	0.11	0.900598	ATM (2.6)	OBFC1 (2.2)	ENSG00000258096 (2.1)	SH3PXD2A (1.9)	ZNF346 (1.5)	LRRC34 (1.3)	RIC8A (1.2)	UIMC1 (1.2)	DMRT1 (1.0)	GREB1 (0.9)
GO:0044236	multicellular organismal metabolic process	0.11	0.900598	ENSG00000228397 (2.0)	SH3PXD2A (2.0)	DMRT1 (1.7)	WNT4 (1.6)	SULT1B1 (1.6)	KDELC2 (1.4)	WT1-AS (1.2)	ZNF346 (1.0)	ODF3 (1.0)	HK3 (1.0)
MP:0003140	dilated heart atrium	0.11	0.900598	SH3PXD2A (1.8)	WT1-AS (1.3)	HK3 (1.2)	ENSG00000226403 (1.1)	CDC42-IT1 (1.1)	ATM (1.1)	LRRC34 (1.0)	ENSG00000228397 (1.0)	MRPS31 (1.0)	WNT4 (0.8)
GO:0015908	fatty acid transport	0.11	0.900598	SLC25A15 (2.0)	ENSG00000184378 (1.9)	COG6 (1.7)	ENSG00000226403 (1.6)	GREB1 (1.6)	ACAT1 (1.5)	KANK1 (1.4)	SIRT3 (1.1)	LINC00339 (1.0)	CUL5 (1.0)
MP:0000187	abnormal triglyceride level	0.11	0.900598	SLC25A15 (1.8)	SULT1B1 (1.7)	ENSG00000184378 (1.7)	FOXO1 (1.6)	KANK1 (1.5)	SH3PXD2A (1.4)	LNX1 (1.4)	ACAT1 (1.3)	SLC38A1 (1.1)	MRPS31 (0.9)
GO:0008234	cysteine-type peptidase activity	0.11	0.900598	CUL5 (3.7)	FIP1L1 (1.9)	EXPH5 (1.9)	LNX1 (1.9)	KDELC2 (1.9)	ENSG00000184378 (1.9)	LRRC31 (1.7)	MYNN (1.7)	ATM (1.6)	C11orf65 (1.5)
MP:0001129	impaired ovarian folliculogenesis	0.11	0.900598	GREB1 (3.7)	ENSG00000226403 (2.6)	WT1-AS (2.4)	C11orf65 (2.2)	KANK1 (1.8)	DMRT1 (1.5)	ODF3 (1.5)	FOXO1 (1.5)	LNX1 (1.3)	SLC25A15 (1.1)
ENSG00000198646	NCOA6 PPI subnetwork	0.11	0.900598	TNRC6B (3.7)	FOXO1 (2.3)	CDC42-IT1 (1.6)	SH3PXD2A (1.2)	RIC8A (1.2)	UIMC1 (1.2)	BET1L (0.9)	C11orf65 (0.8)	CDC42 (0.7)	MRPS31 (0.7)
ENSG00000150991	UBC PPI subnetwork	0.12	0.900598	CDC42 (3.6)	PSMD13 (2.5)	FIP1L1 (1.6)	RIC8A (1.6)	SLC38A2 (1.4)	UIMC1 (1.4)	CDC42-IT1 (1.0)	LNX1 (0.9)	ACAT1 (0.8)	CD44 (0.7)
ENSG00000177728	KIAA0195 PPI subnetwork	0.12	0.900598	NPAT (1.8)	TNRC6B (1.7)	EXPH5 (1.5)	COG6 (1.4)	CUL5 (1.3)	SLC38A2 (1.1)	FIP1L1 (1.1)	ATM (1.1)	UIMC1 (1.1)	LRRC31 (1.1)
ENSG00000156299	TIAM1 PPI subnetwork	0.12	0.900598	WNT4 (2.5)	FOXO1 (2.4)	LRRC31 (1.7)	WT1-AS (1.6)	TNRC6B (1.2)	ENSG00000258096 (1.2)	SLC38A2 (1.1)	SLC38A1 (1.1)	BET1L (1.0)	NPAT (1.0)
ENSG00000148175	STOM PPI subnetwork	0.12	0.900598	TNRC6B (3.0)	ZNF346 (2.0)	ENSG00000228397 (2.0)	GREB1 (1.3)	CDC42-IT1 (1.2)	KDELC2 (1.1)	BET1L (1.1)	SLC38A1 (1.0)	TERT (0.9)	ATM (0.8)
ENSG00000153487	ING1 PPI subnetwork	0.12	0.900598	FIP1L1 (2.0)	CDC42 (1.8)	TNRC6B (1.8)	RIC8A (1.4)	LINC00339 (1.4)	UIMC1 (1.2)	SYNE1 (1.1)	OBFC1 (1.0)	CDC42-IT1 (1.0)	MYNN (1.0)
ENSG00000136709	WDR33 PPI subnetwork	0.12	0.900598	CUL5 (2.8)	GREB1 (1.9)	ENSG00000184378 (1.8)	MYNN (1.7)	LINC00339 (1.6)	MRPS31 (1.5)	SLC25A15 (1.4)	TNRC6B (1.0)	NPAT (1.0)	DMRT1 (1.0)
GO:0004702	receptor signaling protein serine/threonine kinase activity	0.12	0.900598	ENSG00000226403 (1.9)	UIMC1 (1.7)	CD44 (1.6)	TERT (1.5)	LNX1 (1.5)	DMRT1 (1.4)	FOXO1 (1.2)	ENSG00000228397 (1.1)	SULT1B1 (1.1)	KDELC2 (0.9)
MP:0008101	lymph node hypoplasia	0.12	0.900598	SULT1B1 (1.5)	SLC38A1 (1.5)	CD44 (1.3)	TNRC6B (1.2)	C11orf65 (1.1)	ATM (1.1)	OBFC1 (1.1)	NPAT (1.0)	FOXO1 (1.0)	TERT (0.9)
ENSG00000150990	DHX37 PPI subnetwork	0.12	0.900598	FIP1L1 (2.9)	MRPS31 (2.6)	NPAT (1.4)	DMRT1 (1.4)	ATM (1.3)	TERT (1.2)	KANK1 (1.1)	SLC25A15 (1.1)	SCGB1C1 (1.0)	ENSG00000226403 (1.0)
ENSG00000163512	AZI2 PPI subnetwork	0.12	0.900598	COG6 (2.4)	SYNE1 (1.9)	SLC38A2 (1.7)	NPAT (1.7)	LRRC31 (1.7)	ODF3 (1.5)	CUL5 (1.4)	EXPH5 (1.3)	TNRC6B (1.2)	FIP1L1 (1.2)
GO:0002237	response to molecule of bacterial origin	0.12	0.900598	HK3 (2.9)	CD44 (2.3)	SULT1B1 (2.1)	LNX1 (2.0)	ENSG00000184378 (1.2)	LRRC31 (1.1)	CDC42-IT1 (0.8)	KANK1 (0.8)	DMRT1 (0.7)	UIMC1 (0.6)
ENSG00000086598	TMED2 PPI subnetwork	0.12	0.900598	BET1L (4.4)	COG6 (2.8)	MRPS31 (2.1)	PSMD13 (2.0)	RIC8A (1.1)	SLC25A15 (1.1)	ENSG00000258096 (1.1)	CUL5 (1.0)	ZNF346 (1.0)	CDC42-IT1 (0.8)
ENSG00000126218	F10 PPI subnetwork	0.12	0.900598	ODF3 (2.2)	ENSG00000258096 (1.5)	LRRC34 (1.1)	SALL1 (1.1)	C11orf65 (1.0)	WNT4 (1.0)	CD44 (1.0)	DMRT1 (0.9)	OBFC1 (0.9)	SCGB1C1 (0.9)
GO:0030258	lipid modification	0.12	0.900598	ACAT1 (3.7)	SIRT3 (2.9)	LRRC31 (2.4)	SLC25A15 (2.0)	SCGB1C1 (1.6)	MRPS31 (1.5)	SULT1B1 (1.5)	LNX1 (1.2)	BET1L (1.2)	LRRC34 (1.2)
GO:0004843	ubiquitin-specific protease activity	0.12	0.900598	CUL5 (3.7)	NPAT (2.3)	UIMC1 (1.7)	FIP1L1 (1.6)	EXPH5 (1.5)	WT1-AS (1.2)	ATM (1.1)	PSMD13 (0.9)	ENSG00000226403 (0.9)	CDC42 (0.9)
GO:0051568	histone H3-K4 methylation	0.12	0.900598	NPAT (2.3)	TERT (2.1)	TNRC6B (2.1)	ATM (1.4)	DMRT1 (1.3)	WT1-AS (1.2)	ZNF346 (0.8)	LRRC34 (0.8)	UIMC1 (0.7)	LNX1 (0.7)
REACTOME_BIOSYNTHESIS_OF_THE_N:GLYCAN_PRECURSOR_DOLICHOL_LIPID:LINKED_OLIGOSACCHARIDE_LLO_AND_TRANSFER_TO_A_NASCENT_PROTEIN	REACTOME_BIOSYNTHESIS_OF_THE_N:GLYCAN_PRECURSOR_DOLICHOL_LIPID:LINKED_OLIGOSACCHARIDE_LLO_AND_TRANSFER_TO_A_NASCENT_PROTEIN	0.12	0.900598	COG6 (2.8)	LRRC31 (2.1)	BET1L (1.9)	LINC00339 (1.8)	MYNN (1.4)	CUL5 (1.1)	ATM (1.1)	SLC25A15 (0.8)	ENSG00000228397 (0.7)	RIC8A (0.7)
MP:0003156	abnormal leukocyte migration	0.12	0.900598	HK3 (3.4)	CD44 (2.6)	OBFC1 (1.7)	SULT1B1 (1.2)	RIC8A (1.1)	SLC38A1 (1.0)	SCGB1C1 (0.9)	SYNE1 (0.9)	CDC42 (0.6)	TNRC6B (0.5)
KEGG_PROSTATE_CANCER	KEGG_PROSTATE_CANCER	0.12	0.900598	GREB1 (2.7)	SH3PXD2A (2.1)	FOXO1 (2.0)	LRRC31 (1.9)	TNRC6B (1.6)	WNT4 (1.6)	CDC42 (1.3)	BET1L (1.2)	LINC00339 (1.0)	SLC25A15 (1.0)
MP:0009750	impaired behavioral response to addictive substance	0.12	0.900598	SYNE1 (2.2)	SCGB1C1 (2.0)	TERT (1.9)	ENSG00000226403 (1.4)	FOXO1 (1.3)	HK3 (1.1)	SALL1 (1.0)	ODF3 (1.0)	LINC00339 (0.9)	GREB1 (0.8)
KEGG_CIRCADIAN_RHYTHM_MAMMAL	KEGG_CIRCADIAN_RHYTHM_MAMMAL	0.12	0.900598	FOXO1 (3.0)	LNX1 (2.4)	SIRT3 (2.3)	ENSG00000228397 (1.6)	WNT4 (1.4)	FIP1L1 (1.3)	SYNE1 (1.2)	SH3PXD2A (1.2)	COG6 (1.1)	LINC00339 (1.0)
GO:0016746	transferase activity, transferring acyl groups	0.12	0.900598	OBFC1 (2.4)	SLC25A15 (2.3)	ACAT1 (2.3)	SULT1B1 (2.0)	SIRT3 (1.7)	SALL1 (1.5)	LRRC31 (1.1)	TNRC6B (0.9)	KDELC2 (0.9)	CUL5 (0.9)
ENSG00000127616	SMARCA4 PPI subnetwork	0.12	0.900598	FIP1L1 (2.6)	CUL5 (2.6)	SCGB1C1 (2.3)	TNRC6B (2.0)	NPAT (1.9)	SLC38A2 (1.9)	SH3PXD2A (1.2)	ENSG00000184378 (1.1)	DMRT1 (1.0)	UIMC1 (0.9)
GO:0005544	calcium-dependent phospholipid binding	0.12	0.900598	CD44 (3.1)	SYNE1 (2.9)	HK3 (2.6)	KDELC2 (2.0)	SULT1B1 (1.9)	OBFC1 (1.7)	CDC42 (1.4)	ZNF346 (1.2)	DMRT1 (1.1)	SLC38A1 (1.0)
ENSG00000164889	SLC4A2 PPI subnetwork	0.12	0.900598	UIMC1 (2.5)	LINC00339 (2.2)	TNRC6B (1.5)	SYNE1 (1.5)	NPAT (1.5)	LRRC31 (1.3)	ENSG00000184378 (1.2)	MYNN (1.1)	COG6 (1.1)	MRPS31 (0.9)
MP:0002447	abnormal erythrocyte morphology	0.12	0.900598	TNRC6B (1.2)	HK3 (1.2)	ENSG00000258096 (1.0)	NPAT (0.9)	DMRT1 (0.8)	SLC25A15 (0.7)	SLC38A2 (0.7)	CDC42-IT1 (0.6)	ZNF346 (0.6)	ENSG00000184378 (0.5)
ENSG00000051382	PIK3CB PPI subnetwork	0.12	0.900598	HK3 (3.1)	BET1L (1.7)	LRRC31 (1.7)	GREB1 (1.6)	DMRT1 (1.5)	SULT1B1 (1.4)	FOXO1 (1.3)	C11orf65 (1.2)	WT1-AS (1.1)	RIC8A (1.1)
GO:0004519	endonuclease activity	0.12	0.900598	OBFC1 (3.3)	ZNF346 (2.3)	TERT (2.2)	MRPS31 (2.1)	SH3PXD2A (1.9)	ATM (1.6)	NPAT (1.3)	SLC25A15 (1.0)	EXPH5 (1.0)	CUL5 (1.0)
GO:0043200	response to amino acid stimulus	0.12	0.900598	LNX1 (3.5)	ENSG00000184378 (2.5)	ENSG00000226403 (2.0)	ODF3 (1.3)	SLC25A15 (1.1)	SLC38A2 (1.0)	NPAT (1.0)	KANK1 (1.0)	WT1-AS (0.9)	DMRT1 (0.9)
GO:0070603	SWI/SNF-type complex	0.12	0.900598	TNRC6B (2.3)	TERT (1.9)	FOXO1 (1.8)	FIP1L1 (1.7)	ENSG00000226403 (1.4)	CUL5 (1.2)	WNT4 (0.9)	GREB1 (0.8)	DMRT1 (0.6)	CDC42-IT1 (0.6)
ENSG00000078304	PPP2R5C PPI subnetwork	0.12	0.900598	KANK1 (1.9)	ATM (1.5)	UIMC1 (1.4)	GREB1 (1.3)	EXPH5 (1.2)	LRRC34 (1.0)	LNX1 (0.9)	SLC38A2 (0.9)	ACAT1 (0.9)	NPAT (0.8)
GO:0007266	Rho protein signal transduction	0.12	0.900598	ENSG00000226403 (1.6)	MYNN (1.2)	SH3PXD2A (1.1)	OBFC1 (1.1)	EXPH5 (1.1)	FIP1L1 (0.9)	LRRC34 (0.9)	SYNE1 (0.8)	TERT (0.8)	C11orf65 (0.8)
GO:0007494	midgut development	0.12	0.900598	ENSG00000258096 (2.8)	LRRC31 (2.7)	ENSG00000226403 (2.1)	SLC25A15 (1.9)	SULT1B1 (1.9)	ODF3 (1.8)	SALL1 (1.6)	ATM (0.9)	LRRC34 (0.8)	LNX1 (0.8)
ENSG00000049246	PER3 PPI subnetwork	0.12	0.900598	FOXO1 (4.1)	SIRT3 (2.8)	SH3PXD2A (2.6)	EXPH5 (1.5)	ENSG00000228397 (1.4)	FIP1L1 (1.3)	SYNE1 (1.2)	RIC8A (1.1)	SCGB1C1 (1.1)	SLC38A1 (0.9)
MP:0005222	abnormal somite size	0.12	0.900598	SALL1 (3.2)	GREB1 (2.5)	TNRC6B (2.2)	WNT4 (2.2)	WT1-AS (2.1)	ENSG00000228397 (1.9)	SH3PXD2A (1.8)	MRPS31 (1.7)	SLC25A15 (1.4)	LRRC31 (1.3)
ENSG00000120129	DUSP1 PPI subnetwork	0.12	0.900598	UIMC1 (1.6)	CDC42-IT1 (1.6)	COG6 (1.3)	LNX1 (1.3)	SULT1B1 (1.3)	WT1-AS (1.3)	ENSG00000226403 (1.2)	TERT (1.2)	PSMD13 (1.2)	ZNF346 (1.1)
MP:0004502	decreased incidence of chemically-induced tumors	0.12	0.900598	CD44 (4.0)	DMRT1 (2.1)	KDELC2 (1.9)	MYNN (1.9)	SLC38A2 (1.9)	LRRC34 (1.6)	WT1-AS (1.1)	KANK1 (1.1)	LINC00339 (1.1)	CUL5 (1.0)
GO:0048732	gland development	0.12	0.900598	WNT4 (3.5)	GREB1 (3.1)	SALL1 (2.3)	WT1-AS (2.0)	ENSG00000228397 (1.8)	SH3PXD2A (1.7)	ENSG00000258096 (1.3)	ENSG00000226403 (1.1)	SLC38A1 (1.0)	KANK1 (0.8)
ENSG00000165219	GAPVD1 PPI subnetwork	0.12	0.900598	COG6 (2.5)	LRRC31 (2.0)	CUL5 (2.0)	SLC38A2 (1.9)	SYNE1 (1.9)	EXPH5 (1.5)	ODF3 (1.4)	SIRT3 (1.4)	SLC38A1 (1.3)	ATM (1.2)
ENSG00000070193	FGF10 PPI subnetwork	0.12	0.900598	LNX1 (2.4)	WNT4 (2.2)	SH3PXD2A (1.6)	MYNN (1.6)	TERT (1.5)	ZNF346 (1.5)	UIMC1 (1.3)	LRRC31 (1.3)	KDELC2 (1.2)	SALL1 (1.2)
MP:0008079	decreased CD8-positive T cell number	0.12	0.900598	HK3 (1.7)	SYNE1 (1.6)	ATM (1.3)	TERT (1.2)	SLC38A1 (1.1)	FOXO1 (1.1)	MYNN (1.0)	CD44 (0.9)	GREB1 (0.9)	NPAT (0.7)
ENSG00000214485	ENSG00000214485 PPI subnetwork	0.12	0.900598	FIP1L1 (1.9)	ENSG00000226403 (1.7)	DMRT1 (1.6)	NPAT (1.4)	ATM (1.4)	KANK1 (1.4)	MRPS31 (1.3)	TERT (1.3)	CD44 (1.2)	MYNN (1.0)
GO:0008585	female gonad development	0.12	0.900598	GREB1 (5.7)	WT1-AS (4.2)	C11orf65 (2.8)	DMRT1 (2.0)	LINC00339 (2.0)	ENSG00000228397 (1.8)	ENSG00000258096 (1.6)	FOXO1 (1.5)	KANK1 (1.5)	ODF3 (1.3)
MP:0000091	short premaxilla	0.12	0.900598	FOXO1 (3.1)	SALL1 (3.1)	LNX1 (1.8)	SH3PXD2A (1.6)	GREB1 (1.3)	UIMC1 (1.1)	TNRC6B (1.1)	LRRC34 (1.0)	RIC8A (1.0)	LINC00339 (0.9)
ENSG00000143851	PTPN7 PPI subnetwork	0.12	0.900598	SULT1B1 (2.5)	ENSG00000226403 (2.1)	COG6 (1.9)	CDC42-IT1 (1.8)	ZNF346 (1.6)	BET1L (1.3)	CDC42 (1.1)	ENSG00000184378 (1.0)	WT1-AS (1.0)	LRRC31 (1.0)
ENSG00000012124	CD22 PPI subnetwork	0.12	0.900598	CD44 (2.1)	RIC8A (1.9)	FOXO1 (1.8)	HK3 (1.6)	LRRC34 (1.5)	ODF3 (1.4)	WT1-AS (1.2)	CDC42 (1.1)	KANK1 (1.1)	SLC38A1 (1.0)
ENSG00000139514	SLC7A1 PPI subnetwork	0.12	0.900598	CD44 (2.1)	ENSG00000226403 (2.0)	HK3 (1.8)	KANK1 (1.5)	ACAT1 (1.5)	BET1L (1.3)	SLC38A2 (1.2)	SULT1B1 (1.1)	CDC42-IT1 (1.1)	SLC38A1 (1.0)
ENSG00000172053	QARS PPI subnetwork	0.12	0.900598	SLC38A2 (2.5)	RIC8A (1.9)	ATM (1.8)	KANK1 (1.4)	SLC38A1 (1.4)	ACAT1 (1.0)	COG6 (1.0)	MRPS31 (1.0)	DMRT1 (0.8)	LINC00339 (0.8)
ENSG00000139372	TDG PPI subnetwork	0.12	0.900598	GREB1 (3.1)	TNRC6B (2.2)	CDC42 (2.0)	SALL1 (2.0)	CDC42-IT1 (1.5)	FOXO1 (1.5)	MYNN (1.3)	SLC38A2 (1.2)	CUL5 (1.1)	ENSG00000226403 (1.0)
GO:0090311	regulation of protein deacetylation	0.12	0.900598	SH3PXD2A (2.2)	CDC42-IT1 (2.1)	LINC00339 (1.9)	COG6 (1.8)	NPAT (1.0)	TNRC6B (1.0)	TERT (1.0)	ATM (0.9)	EXPH5 (0.8)	OBFC1 (0.8)
ENSG00000198612	COPS8 PPI subnetwork	0.12	0.900598	MYNN (3.1)	COG6 (2.9)	MRPS31 (2.8)	ZNF346 (1.7)	ACAT1 (1.4)	OBFC1 (1.3)	SULT1B1 (1.3)	UIMC1 (1.2)	PSMD13 (1.2)	LRRC34 (1.1)
ENSG00000164597	COG5 PPI subnetwork	0.12	0.900598	ZNF346 (2.8)	FOXO1 (2.4)	COG6 (2.4)	OBFC1 (2.2)	MRPS31 (2.1)	LNX1 (2.0)	BET1L (1.9)	FIP1L1 (1.9)	UIMC1 (1.8)	EXPH5 (1.3)
GO:0006888	ER to Golgi vesicle-mediated transport	0.12	0.900598	COG6 (6.7)	BET1L (5.3)	MYNN (2.7)	RIC8A (1.6)	ENSG00000184378 (1.4)	MRPS31 (1.3)	CUL5 (1.1)	PSMD13 (1.1)	CDC42 (0.8)	UIMC1 (0.8)
REACTOME_FORMATION_OF_FIBRIN_CLOT_CLOTTING_CASCADE	REACTOME_FORMATION_OF_FIBRIN_CLOT_CLOTTING_CASCADE	0.12	0.900598	SCGB1C1 (4.6)	SLC25A15 (1.8)	C11orf65 (1.3)	ENSG00000258096 (0.9)	SIRT3 (0.9)	LRRC31 (0.8)	WNT4 (0.8)	LNX1 (0.6)	COG6 (0.6)	SALL1 (0.6)
GO:0001673	male germ cell nucleus	0.12	0.900598	DMRT1 (2.7)	ZNF346 (2.4)	UIMC1 (2.2)	ATM (2.1)	ODF3 (2.1)	NPAT (1.9)	SCGB1C1 (1.5)	KDELC2 (1.2)	ENSG00000184378 (1.1)	MYNN (1.0)
ENSG00000078043	PIAS2 PPI subnetwork	0.12	0.900598	GREB1 (6.8)	ENSG00000184378 (2.2)	CDC42 (1.8)	FOXO1 (1.4)	TNRC6B (1.4)	WNT4 (1.4)	CD44 (1.4)	SALL1 (1.3)	LINC00339 (1.1)	SLC38A1 (1.1)
ENSG00000135404	CD63 PPI subnetwork	0.12	0.900598	CD44 (5.2)	DMRT1 (2.0)	SCGB1C1 (1.4)	ENSG00000226403 (1.4)	C11orf65 (1.2)	TNRC6B (1.2)	FIP1L1 (1.2)	HK3 (1.1)	LRRC34 (1.1)	WT1-AS (1.1)
GO:0016050	vesicle organization	0.12	0.900598	COG6 (5.7)	BET1L (3.8)	CDC42-IT1 (2.0)	LINC00339 (1.9)	ENSG00000258096 (1.7)	KDELC2 (1.4)	MYNN (1.3)	CDC42 (1.1)	ENSG00000228397 (1.0)	RIC8A (1.0)
ENSG00000137574	TGS1 PPI subnetwork	0.12	0.900598	TNRC6B (4.2)	CUL5 (2.3)	ATM (1.8)	SYNE1 (1.7)	COG6 (1.3)	KDELC2 (1.2)	SLC25A15 (1.2)	ACAT1 (1.2)	UIMC1 (1.1)	FOXO1 (1.0)
GO:0006476	protein deacetylation	0.12	0.900598	LINC00339 (2.1)	SH3PXD2A (1.9)	TERT (1.5)	TNRC6B (1.3)	OBFC1 (1.2)	SIRT3 (1.1)	RIC8A (1.1)	BET1L (1.0)	SLC38A1 (1.0)	MYNN (0.9)
ENSG00000095002	MSH2 PPI subnetwork	0.12	0.900598	ATM (3.4)	OBFC1 (3.1)	NPAT (2.9)	TERT (2.6)	ENSG00000228397 (1.8)	LINC00339 (1.6)	KDELC2 (1.5)	FIP1L1 (1.3)	SCGB1C1 (1.2)	MRPS31 (1.2)
GO:0071466	cellular response to xenobiotic stimulus	0.12	0.900598	SULT1B1 (4.6)	ODF3 (2.5)	EXPH5 (2.2)	LNX1 (2.2)	SLC25A15 (2.1)	DMRT1 (1.3)	LINC00339 (1.3)	OBFC1 (1.2)	ENSG00000226403 (0.8)	MRPS31 (0.8)
GO:0009410	response to xenobiotic stimulus	0.12	0.900598	SULT1B1 (4.6)	ODF3 (2.5)	EXPH5 (2.2)	LNX1 (2.2)	SLC25A15 (2.1)	DMRT1 (1.3)	LINC00339 (1.3)	OBFC1 (1.2)	ENSG00000226403 (0.8)	MRPS31 (0.8)
ENSG00000213923	CSNK1E PPI subnetwork	0.12	0.900598	TERT (1.8)	RIC8A (1.6)	FIP1L1 (1.6)	ATM (1.5)	OBFC1 (1.5)	MRPS31 (1.4)	NPAT (1.4)	UIMC1 (1.4)	FOXO1 (1.4)	SLC25A15 (1.3)
MP:0008481	increased spleen germinal center number	0.12	0.900598	HK3 (3.3)	LRRC34 (1.9)	COG6 (1.8)	GREB1 (1.8)	SLC38A1 (1.6)	WT1-AS (1.3)	ENSG00000258096 (1.2)	CD44 (1.2)	SYNE1 (1.0)	WNT4 (0.6)
ENSG00000111241	FGF6 PPI subnetwork	0.12	0.900598	LNX1 (2.9)	WNT4 (2.1)	ZNF346 (1.7)	UIMC1 (1.7)	SH3PXD2A (1.7)	LRRC31 (1.5)	KDELC2 (1.5)	ENSG00000184378 (1.4)	TERT (1.1)	ENSG00000258096 (1.0)
ENSG00000156427	FGF18 PPI subnetwork	0.12	0.900598	LNX1 (2.9)	WNT4 (2.1)	ZNF346 (1.7)	UIMC1 (1.7)	SH3PXD2A (1.7)	LRRC31 (1.5)	KDELC2 (1.5)	ENSG00000184378 (1.4)	TERT (1.1)	ENSG00000258096 (1.0)
ENSG00000158815	FGF17 PPI subnetwork	0.12	0.900598	LNX1 (2.9)	WNT4 (2.1)	ZNF346 (1.7)	UIMC1 (1.7)	SH3PXD2A (1.7)	LRRC31 (1.5)	KDELC2 (1.5)	ENSG00000184378 (1.4)	TERT (1.1)	ENSG00000258096 (1.0)
ENSG00000107831	FGF8 PPI subnetwork	0.12	0.900598	LNX1 (2.9)	WNT4 (2.1)	ZNF346 (1.7)	UIMC1 (1.7)	SH3PXD2A (1.7)	LRRC31 (1.5)	KDELC2 (1.5)	ENSG00000184378 (1.4)	TERT (1.1)	ENSG00000258096 (1.0)
ENSG00000070388	FGF22 PPI subnetwork	0.12	0.900598	LNX1 (2.9)	WNT4 (2.1)	ZNF346 (1.7)	UIMC1 (1.7)	SH3PXD2A (1.7)	LRRC31 (1.5)	KDELC2 (1.5)	ENSG00000184378 (1.4)	TERT (1.1)	ENSG00000258096 (1.0)
ENSG00000162344	FGF19 PPI subnetwork	0.12	0.900598	LNX1 (2.9)	WNT4 (2.1)	ZNF346 (1.7)	UIMC1 (1.7)	SH3PXD2A (1.7)	LRRC31 (1.5)	KDELC2 (1.5)	ENSG00000184378 (1.4)	TERT (1.1)	ENSG00000258096 (1.0)
ENSG00000213588	ZBTB9 PPI subnetwork	0.12	0.900598	MYNN (3.3)	CUL5 (2.5)	MRPS31 (2.4)	NPAT (2.3)	UIMC1 (2.0)	FIP1L1 (1.9)	BET1L (1.7)	RIC8A (1.3)	ZNF346 (0.9)	PSMD13 (0.8)
GO:0006805	xenobiotic metabolic process	0.12	0.900598	SULT1B1 (4.6)	ODF3 (2.5)	EXPH5 (2.3)	LNX1 (2.2)	SLC25A15 (2.1)	DMRT1 (1.3)	LINC00339 (1.3)	OBFC1 (1.2)	ENSG00000226403 (0.8)	MRPS31 (0.8)
MP:0000334	decreased granulocyte number	0.12	0.900598	HK3 (3.9)	TNRC6B (2.0)	SYNE1 (1.7)	ATM (1.1)	CDC42-IT1 (1.1)	ENSG00000226403 (0.9)	CD44 (0.9)	FOXO1 (0.8)	GREB1 (0.8)	SIRT3 (0.8)
GO:0003714	transcription corepressor activity	0.12	0.900598	SLC38A2 (3.3)	TNRC6B (2.8)	WT1-AS (1.8)	FOXO1 (1.6)	MYNN (1.4)	FIP1L1 (1.4)	SLC38A1 (1.4)	NPAT (1.2)	UIMC1 (1.1)	ZNF346 (1.1)
GO:0008289	lipid binding	0.12	0.900598	GREB1 (1.7)	HK3 (1.7)	KANK1 (1.7)	SLC25A15 (1.6)	SULT1B1 (1.5)	ACAT1 (1.3)	ENSG00000258096 (1.0)	CDC42 (1.0)	LNX1 (0.9)	CDC42-IT1 (0.9)
GO:0009055	electron carrier activity	0.12	0.900598	ACAT1 (3.9)	SULT1B1 (3.3)	SLC25A15 (2.3)	EXPH5 (1.5)	MRPS31 (1.3)	PSMD13 (1.0)	LNX1 (0.9)	SIRT3 (0.9)	SCGB1C1 (0.8)	LRRC31 (0.8)
ENSG00000091127	PUS7 PPI subnetwork	0.12	0.900598	MRPS31 (2.1)	FIP1L1 (2.0)	ENSG00000228397 (1.7)	DMRT1 (1.5)	SH3PXD2A (1.3)	TERT (1.2)	ATM (1.0)	KANK1 (1.0)	ACAT1 (1.0)	COG6 (0.8)
GO:0006544	glycine metabolic process	0.12	0.900598	SIRT3 (2.5)	SULT1B1 (2.1)	SLC25A15 (2.0)	TERT (1.9)	C11orf65 (1.6)	ATM (1.6)	DMRT1 (1.1)	EXPH5 (0.8)	SLC38A1 (0.7)	LRRC34 (0.7)
GO:0042598	vesicular fraction	0.12	0.900598	SLC25A15 (2.4)	SULT1B1 (2.4)	EXPH5 (1.9)	SLC38A2 (1.2)	ODF3 (1.2)	LRRC31 (1.1)	SCGB1C1 (0.9)	ACAT1 (0.8)	TNRC6B (0.6)	ENSG00000226403 (0.6)
GO:0008652	cellular amino acid biosynthetic process	0.12	0.900598	SLC25A15 (2.1)	SIRT3 (1.8)	ACAT1 (1.5)	SLC38A2 (1.3)	ENSG00000226403 (1.3)	SULT1B1 (1.2)	CDC42-IT1 (1.2)	EXPH5 (1.1)	DMRT1 (1.1)	SLC38A1 (0.8)
GO:0032452	histone demethylase activity	0.12	0.900598	SH3PXD2A (2.3)	ENSG00000184378 (2.2)	SLC25A15 (1.9)	FIP1L1 (1.8)	UIMC1 (1.7)	ODF3 (1.7)	COG6 (1.5)	TNRC6B (1.5)	KANK1 (1.2)	CDC42-IT1 (0.9)
MP:0002784	abnormal Sertoli cell morphology	0.12	0.900598	DMRT1 (7.4)	SALL1 (3.0)	WT1-AS (2.7)	GREB1 (2.0)	KANK1 (2.0)	ENSG00000226403 (2.0)	SULT1B1 (1.3)	C11orf65 (1.1)	ENSG00000228397 (1.1)	FIP1L1 (0.9)
REACTOME_ACTIVATION_OF_CHAPERONES_BY_IRE1ALPHA	REACTOME_ACTIVATION_OF_CHAPERONES_BY_IRE1ALPHA	0.12	0.900598	BET1L (4.6)	COG6 (2.3)	RIC8A (1.5)	SLC38A2 (1.4)	ENSG00000258096 (1.3)	MYNN (1.3)	GREB1 (1.3)	KDELC2 (0.9)	SLC25A15 (0.8)	PSMD13 (0.8)
ENSG00000138430	OLA1 PPI subnetwork	0.12	0.900598	PSMD13 (2.1)	MRPS31 (1.8)	MYNN (1.7)	FIP1L1 (1.6)	NPAT (1.4)	OBFC1 (1.3)	COG6 (1.3)	SLC38A2 (1.2)	TERT (1.2)	ACAT1 (0.9)
ENSG00000160282	FTCD PPI subnetwork	0.12	0.900598	SLC38A2 (1.6)	NPAT (1.3)	RIC8A (1.2)	ATM (0.9)	PSMD13 (0.9)	TNRC6B (0.8)	SIRT3 (0.7)	SLC38A1 (0.7)	FIP1L1 (0.7)	HK3 (0.7)
ENSG00000112983	BRD8 PPI subnetwork	0.12	0.900598	FIP1L1 (2.1)	LINC00339 (2.0)	MRPS31 (1.7)	ODF3 (1.6)	MYNN (1.5)	UIMC1 (1.4)	GREB1 (1.2)	LNX1 (0.9)	SLC38A2 (0.9)	PSMD13 (0.8)
GO:0005761	mitochondrial ribosome	0.12	0.900598	MRPS31 (4.8)	SIRT3 (1.9)	OBFC1 (1.6)	ACAT1 (1.5)	LINC00339 (1.3)	PSMD13 (1.0)	MYNN (0.9)	WT1-AS (0.7)	TNRC6B (0.7)	SLC25A15 (0.6)
GO:0000313	organellar ribosome	0.12	0.900598	MRPS31 (4.8)	SIRT3 (1.9)	OBFC1 (1.6)	ACAT1 (1.5)	LINC00339 (1.3)	PSMD13 (1.0)	MYNN (0.9)	WT1-AS (0.7)	TNRC6B (0.7)	SLC25A15 (0.6)
REACTOME_BIOLOGICAL_OXIDATIONS	REACTOME_BIOLOGICAL_OXIDATIONS	0.12	0.900598	SULT1B1 (5.9)	SLC25A15 (2.4)	EXPH5 (2.4)	ODF3 (1.5)	LNX1 (1.4)	MRPS31 (1.1)	LINC00339 (0.9)	ENSG00000226403 (0.9)	DMRT1 (0.9)	ACAT1 (0.8)
ENSG00000178105	DDX10 PPI subnetwork	0.12	0.900598	FIP1L1 (3.0)	CUL5 (3.0)	MRPS31 (1.8)	ATM (1.6)	DMRT1 (1.6)	NPAT (1.6)	SCGB1C1 (1.5)	TERT (1.0)	BET1L (0.9)	C11orf65 (0.9)
ENSG00000108270	AATF PPI subnetwork	0.12	0.900598	NPAT (2.3)	TERT (2.3)	CUL5 (2.2)	ATM (2.1)	MRPS31 (1.9)	BET1L (1.8)	FIP1L1 (1.8)	CD44 (1.5)	PSMD13 (1.4)	MYNN (1.3)
MP:0001819	abnormal immune cell physiology	0.12	0.900598	HK3 (2.1)	SULT1B1 (2.0)	GREB1 (1.5)	LINC00339 (1.5)	SYNE1 (1.4)	CD44 (1.1)	SH3PXD2A (1.0)	LRRC34 (0.8)	MYNN (0.7)	NPAT (0.7)
GO:0070925	organelle assembly	0.12	0.900598	ZNF346 (3.0)	ODF3 (2.3)	UIMC1 (1.7)	DMRT1 (1.4)	ATM (1.4)	COG6 (1.2)	SIRT3 (1.0)	RIC8A (1.0)	SCGB1C1 (0.9)	MYNN (0.8)
MP:0000633	abnormal pituitary gland morphology	0.12	0.900598	SALL1 (2.4)	WNT4 (1.8)	ATM (1.7)	ENSG00000228397 (1.5)	LRRC31 (1.5)	OBFC1 (1.5)	LNX1 (1.4)	TERT (1.4)	DMRT1 (1.0)	WT1-AS (1.0)
MP:0008554	decreased circulating tumor necrosis factor level	0.12	0.900598	KANK1 (2.5)	HK3 (2.4)	CD44 (1.6)	GREB1 (1.4)	COG6 (1.0)	TERT (0.8)	MRPS31 (0.7)	BET1L (0.7)	CUL5 (0.6)	LNX1 (0.6)
ENSG00000172809	RPL38 PPI subnetwork	0.12	0.900598	BET1L (2.2)	SULT1B1 (1.6)	ENSG00000226403 (1.6)	UIMC1 (1.5)	MYNN (1.5)	WT1-AS (1.3)	CD44 (1.2)	LRRC34 (1.1)	CDC42 (0.8)	DMRT1 (0.7)
ENSG00000169592	INO80E PPI subnetwork	0.12	0.900598	MYNN (3.7)	MRPS31 (1.6)	KDELC2 (1.3)	FIP1L1 (1.3)	UIMC1 (1.2)	LINC00339 (1.2)	PSMD13 (1.1)	COG6 (1.1)	ODF3 (0.8)	ENSG00000258096 (0.8)
ENSG00000146535	GNA12 PPI subnetwork	0.12	0.900598	SLC38A1 (2.3)	HK3 (2.3)	CDC42 (2.0)	RIC8A (1.9)	WT1-AS (1.8)	FOXO1 (1.7)	WNT4 (1.7)	CDC42-IT1 (1.6)	ATM (1.0)	BET1L (0.8)
ENSG00000174989	FBXW8 PPI subnetwork	0.12	0.900598	OBFC1 (2.4)	ACAT1 (2.3)	CDC42-IT1 (1.6)	COG6 (1.5)	SCGB1C1 (1.5)	SLC38A1 (1.3)	ATM (1.3)	SLC38A2 (1.2)	SIRT3 (1.1)	PSMD13 (0.9)
ENSG00000106992	AK1 PPI subnetwork	0.12	0.900598	SLC38A1 (2.4)	CD44 (1.9)	HK3 (1.9)	SYNE1 (1.8)	SLC38A2 (1.7)	KANK1 (1.7)	CDC42-IT1 (1.4)	SULT1B1 (1.3)	FOXO1 (1.2)	ACAT1 (1.1)
GO:0000407	pre-autophagosomal structure	0.12	0.900598	BET1L (3.0)	SIRT3 (2.7)	SLC38A2 (2.5)	RIC8A (2.0)	GREB1 (1.4)	ENSG00000258096 (1.2)	PSMD13 (1.2)	DMRT1 (1.1)	SYNE1 (0.9)	NPAT (0.9)
ENSG00000173473	SMARCC1 PPI subnetwork	0.12	0.900598	TNRC6B (2.6)	LRRC34 (1.7)	FIP1L1 (1.5)	LINC00339 (1.3)	GREB1 (1.1)	FOXO1 (1.1)	ENSG00000184378 (1.0)	SH3PXD2A (0.9)	TERT (0.9)	CDC42-IT1 (0.9)
ENSG00000169750	RAC3 PPI subnetwork	0.12	0.900598	CDC42-IT1 (2.9)	BET1L (2.2)	CD44 (2.2)	CDC42 (2.0)	RIC8A (1.8)	SALL1 (1.6)	UIMC1 (1.3)	MYNN (1.1)	TNRC6B (1.0)	LNX1 (1.0)
MP:0002151	abnormal neural tube morphology/development	0.12	0.900598	SALL1 (4.7)	KANK1 (2.5)	TNRC6B (1.6)	ATM (1.4)	WNT4 (1.4)	KDELC2 (1.3)	RIC8A (1.1)	LRRC34 (1.0)	WT1-AS (0.9)	SLC25A15 (0.9)
GO:2000242	negative regulation of reproductive process	0.12	0.900598	WT1-AS (4.9)	DMRT1 (2.0)	ZNF346 (1.6)	LRRC34 (1.5)	UIMC1 (1.4)	LRRC31 (1.4)	ATM (1.1)	CUL5 (1.1)	LNX1 (0.9)	ENSG00000226403 (0.8)
MP:0008214	increased immature B cell number	0.12	0.900598	SLC38A1 (2.3)	LRRC34 (2.0)	GREB1 (1.9)	SH3PXD2A (1.3)	CD44 (1.3)	TERT (1.3)	FOXO1 (1.2)	UIMC1 (1.0)	WNT4 (0.9)	SLC38A2 (0.8)
GO:0006900	membrane budding	0.12	0.900598	COG6 (6.6)	BET1L (5.4)	ENSG00000258096 (2.6)	MYNN (1.6)	RIC8A (1.5)	CUL5 (1.3)	ZNF346 (1.3)	CDC42-IT1 (1.2)	ACAT1 (1.2)	KDELC2 (1.0)
ENSG00000105289	TJP3 PPI subnetwork	0.13	0.900598	LRRC31 (2.8)	CDC42-IT1 (2.4)	EXPH5 (2.2)	TERT (1.2)	SLC38A1 (1.1)	HK3 (1.0)	C11orf65 (1.0)	SLC25A15 (0.9)	SULT1B1 (0.9)	DMRT1 (0.9)
GO:0016922	ligand-dependent nuclear receptor binding	0.13	0.900598	TNRC6B (4.5)	UIMC1 (2.0)	SALL1 (1.9)	ZNF346 (1.7)	MRPS31 (1.7)	COG6 (1.6)	CDC42 (1.5)	WNT4 (1.3)	FIP1L1 (1.3)	ENSG00000258096 (1.1)
ENSG00000158290	CUL4B PPI subnetwork	0.13	0.900598	LINC00339 (3.3)	CUL5 (2.7)	NPAT (2.7)	MYNN (2.2)	UIMC1 (1.6)	ATM (1.4)	COG6 (1.2)	ZNF346 (1.2)	KANK1 (1.1)	MRPS31 (0.9)
MP:0005329	abnormal myocardium layer morphology	0.13	0.900598	SALL1 (1.7)	WT1-AS (1.7)	ENSG00000228397 (1.7)	FOXO1 (1.3)	ENSG00000226403 (1.3)	TNRC6B (1.3)	SYNE1 (1.1)	SULT1B1 (0.9)	KANK1 (0.9)	ATM (0.9)
KEGG_PROXIMAL_TUBULE_BICARBONATE_RECLAMATION	KEGG_PROXIMAL_TUBULE_BICARBONATE_RECLAMATION	0.13	0.900598	LRRC31 (2.1)	SIRT3 (1.9)	ODF3 (1.7)	CD44 (1.3)	SYNE1 (1.3)	SLC38A2 (1.2)	ENSG00000258096 (1.2)	SALL1 (1.1)	SLC25A15 (1.0)	EXPH5 (1.0)
MP:0002412	increased susceptibility to bacterial infection	0.13	0.900598	HK3 (7.0)	CD44 (2.7)	SULT1B1 (1.6)	SYNE1 (0.9)	LRRC34 (0.7)	SLC38A2 (0.7)	ENSG00000184378 (0.6)	LINC00339 (0.6)	SCGB1C1 (0.5)	WT1-AS (0.4)
ENSG00000165632	TAF3 PPI subnetwork	0.13	0.900598	UIMC1 (3.4)	MYNN (1.9)	RIC8A (1.7)	MRPS31 (1.6)	NPAT (1.5)	DMRT1 (1.5)	ENSG00000226403 (1.4)	C11orf65 (1.3)	CDC42-IT1 (1.3)	SLC25A15 (1.1)
GO:0005814	centriole	0.13	0.900598	ATM (2.3)	OBFC1 (2.1)	LINC00339 (2.1)	LRRC34 (2.0)	KDELC2 (1.6)	SIRT3 (1.5)	NPAT (1.5)	TERT (1.3)	ODF3 (1.2)	SLC25A15 (1.1)
ENSG00000132589	FLOT2 PPI subnetwork	0.13	0.900598	CUL5 (2.8)	SLC38A1 (2.5)	SCGB1C1 (2.3)	KDELC2 (2.1)	KANK1 (2.0)	SULT1B1 (1.9)	ACAT1 (1.8)	TNRC6B (1.0)	LNX1 (1.0)	EXPH5 (0.9)
ENSG00000124788	ATXN1 PPI subnetwork	0.13	0.900598	TNRC6B (3.3)	SIRT3 (2.1)	ZNF346 (1.8)	UIMC1 (1.8)	CDC42 (1.1)	MYNN (1.0)	SH3PXD2A (1.0)	FIP1L1 (0.9)	WNT4 (0.8)	ODF3 (0.6)
REACTOME_MG1_TRANSITION	REACTOME_MG1_TRANSITION	0.13	0.900598	PSMD13 (4.6)	NPAT (2.0)	MRPS31 (1.5)	CDC42 (1.5)	ENSG00000228397 (1.2)	ZNF346 (1.0)	MYNN (1.0)	ENSG00000258096 (0.9)	OBFC1 (0.9)	LRRC31 (0.8)
REACTOME_DNA_REPLICATION_PRE:INITIATION	REACTOME_DNA_REPLICATION_PRE:INITIATION	0.13	0.900598	PSMD13 (4.6)	NPAT (2.0)	MRPS31 (1.5)	CDC42 (1.5)	ENSG00000228397 (1.2)	ZNF346 (1.0)	MYNN (1.0)	ENSG00000258096 (0.9)	OBFC1 (0.9)	LRRC31 (0.8)
ENSG00000136997	MYC PPI subnetwork	0.13	0.900598	OBFC1 (1.9)	TNRC6B (1.8)	ATM (1.6)	TERT (1.4)	FIP1L1 (1.3)	SCGB1C1 (1.2)	SLC38A2 (1.2)	COG6 (1.2)	FOXO1 (1.0)	CDC42-IT1 (1.0)
GO:0008406	gonad development	0.13	0.900598	DMRT1 (5.1)	GREB1 (4.5)	WT1-AS (3.3)	KANK1 (2.5)	ENSG00000228397 (2.4)	ODF3 (2.0)	C11orf65 (1.6)	LNX1 (1.3)	WNT4 (1.3)	ENSG00000258096 (1.3)
GO:0051324	prophase	0.13	0.900598	DMRT1 (4.0)	C11orf65 (3.0)	ZNF346 (2.9)	ENSG00000226403 (2.1)	UIMC1 (1.9)	COG6 (1.7)	LRRC34 (1.3)	ATM (1.2)	FIP1L1 (1.1)	SIRT3 (0.8)
GO:0043567	regulation of insulin-like growth factor receptor signaling pathway	0.13	0.900598	WT1-AS (2.3)	GREB1 (2.2)	ENSG00000226403 (2.2)	ODF3 (2.0)	SH3PXD2A (1.8)	LINC00339 (1.5)	LRRC31 (1.4)	ENSG00000228397 (1.4)	SLC38A1 (1.4)	TERT (1.2)
GO:0006511	ubiquitin-dependent protein catabolic process	0.13	0.900598	MYNN (2.8)	CUL5 (2.5)	LNX1 (2.3)	COG6 (2.2)	ZNF346 (2.2)	CDC42 (1.8)	PSMD13 (1.7)	UIMC1 (1.6)	FIP1L1 (1.5)	SLC38A2 (1.4)
ENSG00000156453	PCDH1 PPI subnetwork	0.13	0.900598	TNRC6B (2.3)	SLC25A15 (1.5)	CUL5 (1.4)	SALL1 (1.2)	WNT4 (1.1)	GREB1 (0.9)	CDC42 (0.7)	ENSG00000184378 (0.7)	FOXO1 (0.6)	LNX1 (0.6)
MP:0002084	abnormal developmental patterning	0.13	0.900598	SALL1 (3.4)	TNRC6B (1.8)	KDELC2 (1.8)	TERT (1.6)	KANK1 (1.5)	EXPH5 (1.4)	UIMC1 (1.4)	ATM (1.3)	ENSG00000184378 (1.2)	NPAT (1.0)
REACTOME_ACTIVATION_OF_CHAPERONE_GENES_BY_XBP1S	REACTOME_ACTIVATION_OF_CHAPERONE_GENES_BY_XBP1S	0.13	0.900598	BET1L (4.7)	COG6 (2.5)	RIC8A (1.6)	MYNN (1.5)	ENSG00000258096 (1.5)	SLC38A2 (1.3)	GREB1 (1.2)	CUL5 (0.9)	SLC25A15 (0.9)	PSMD13 (0.7)
ENSG00000132361	KIAA0664 PPI subnetwork	0.13	0.900598	FIP1L1 (2.8)	PSMD13 (1.7)	SLC38A1 (1.5)	ATM (1.5)	SLC25A15 (1.5)	TERT (1.3)	DMRT1 (1.3)	MRPS31 (1.3)	KANK1 (1.1)	ENSG00000228397 (1.1)
ENSG00000103342	GSPT1 PPI subnetwork	0.13	0.900598	ENSG00000184378 (2.9)	TERT (1.8)	MRPS31 (1.7)	FIP1L1 (1.7)	UIMC1 (1.6)	ACAT1 (1.6)	TNRC6B (1.5)	KANK1 (1.4)	CUL5 (1.4)	ATM (1.3)
GO:0031929	TOR signaling cascade	0.13	0.900598	SLC38A1 (4.5)	SLC38A2 (4.0)	TNRC6B (2.1)	MYNN (1.9)	ZNF346 (1.5)	ENSG00000184378 (1.1)	ENSG00000226403 (1.1)	CUL5 (1.1)	KANK1 (1.1)	COG6 (1.0)
MP:0000371	diluted coat color	0.13	0.900598	ATM (3.4)	EXPH5 (1.9)	OBFC1 (1.9)	CUL5 (1.6)	ZNF346 (1.6)	WNT4 (1.6)	CD44 (1.6)	SYNE1 (1.2)	NPAT (1.2)	COG6 (1.1)
GO:0007346	regulation of mitotic cell cycle	0.13	0.900598	MRPS31 (2.0)	PSMD13 (2.0)	CUL5 (1.9)	FIP1L1 (1.5)	ZNF346 (1.4)	COG6 (1.3)	KDELC2 (1.3)	NPAT (1.2)	UIMC1 (1.1)	CDC42-IT1 (1.0)
REACTOME_GAB1_SIGNALOSOME	REACTOME_GAB1_SIGNALOSOME	0.13	0.900598	FOXO1 (2.6)	TNRC6B (2.4)	MYNN (2.1)	SLC38A1 (1.8)	SLC38A2 (1.8)	SH3PXD2A (1.8)	RIC8A (1.7)	BET1L (1.5)	ENSG00000258096 (1.1)	SIRT3 (1.0)
KEGG_PROTEIN_EXPORT	KEGG_PROTEIN_EXPORT	0.13	0.900598	BET1L (3.2)	COG6 (2.6)	C11orf65 (1.6)	CDC42 (1.3)	KDELC2 (1.3)	CD44 (1.2)	ZNF346 (1.2)	GREB1 (1.0)	WT1-AS (0.9)	MYNN (0.9)
GO:0046966	thyroid hormone receptor binding	0.13	0.900598	UIMC1 (2.9)	TNRC6B (2.6)	MRPS31 (2.1)	ATM (1.9)	COG6 (1.2)	NPAT (1.2)	FIP1L1 (1.1)	SALL1 (1.1)	SLC38A2 (0.9)	CDC42 (0.8)
KEGG_DRUG_METABOLISM_CYTOCHROME_P450	KEGG_DRUG_METABOLISM_CYTOCHROME_P450	0.13	0.900598	SULT1B1 (4.1)	EXPH5 (2.9)	SLC25A15 (2.4)	OBFC1 (1.8)	ACAT1 (1.7)	LNX1 (1.6)	ODF3 (1.6)	C11orf65 (1.4)	LRRC31 (1.2)	LINC00339 (0.8)
GO:0060026	convergent extension	0.13	0.900598	GREB1 (3.0)	SH3PXD2A (2.1)	WNT4 (1.7)	MYNN (1.7)	LINC00339 (1.6)	SALL1 (1.5)	TERT (1.3)	C11orf65 (1.2)	COG6 (1.1)	BET1L (1.1)
KEGG_STARCH_AND_SUCROSE_METABOLISM	KEGG_STARCH_AND_SUCROSE_METABOLISM	0.13	0.900598	SULT1B1 (4.5)	LRRC31 (2.4)	HK3 (2.0)	LNX1 (1.5)	SLC25A15 (1.5)	COG6 (1.3)	LRRC34 (1.3)	ACAT1 (1.3)	SYNE1 (1.2)	SCGB1C1 (1.0)
ENSG00000122512	PMS2 PPI subnetwork	0.13	0.900598	TERT (3.5)	ATM (3.3)	NPAT (2.7)	ENSG00000228397 (2.6)	SCGB1C1 (2.2)	OBFC1 (1.8)	GREB1 (1.7)	KDELC2 (1.6)	LINC00339 (1.4)	DMRT1 (1.4)
ENSG00000187953	ENSG00000187953 PPI subnetwork	0.13	0.900598	TERT (3.5)	ATM (3.3)	NPAT (2.7)	ENSG00000228397 (2.6)	SCGB1C1 (2.2)	OBFC1 (1.8)	GREB1 (1.7)	KDELC2 (1.6)	LINC00339 (1.4)	DMRT1 (1.4)
ENSG00000005156	LIG3 PPI subnetwork	0.13	0.900598	LRRC31 (3.0)	TERT (2.3)	C11orf65 (2.3)	OBFC1 (2.2)	ATM (2.2)	FOXO1 (1.9)	TNRC6B (1.4)	FIP1L1 (1.4)	NPAT (1.4)	ODF3 (1.3)
ENSG00000113140	SPARC PPI subnetwork	0.13	0.900598	WNT4 (2.3)	SH3PXD2A (2.1)	SCGB1C1 (1.8)	SULT1B1 (1.6)	DMRT1 (1.2)	C11orf65 (1.0)	LRRC34 (0.8)	CD44 (0.7)	SLC25A15 (0.7)	KANK1 (0.5)
GO:0010035	response to inorganic substance	0.13	0.900598	SLC38A2 (2.0)	KANK1 (1.8)	SLC25A15 (1.8)	ACAT1 (1.6)	ENSG00000258096 (1.4)	HK3 (1.4)	WT1-AS (1.1)	ENSG00000226403 (1.1)	CD44 (0.9)	SYNE1 (0.9)
ENSG00000161980	POLR3K PPI subnetwork	0.13	0.900598	KANK1 (2.4)	SCGB1C1 (1.4)	PSMD13 (1.3)	ENSG00000184378 (1.2)	ENSG00000226403 (1.2)	BET1L (1.1)	ATM (1.1)	RIC8A (1.0)	OBFC1 (1.0)	NPAT (0.9)
GO:0008173	RNA methyltransferase activity	0.13	0.900598	SIRT3 (2.0)	TERT (1.8)	MRPS31 (1.7)	LINC00339 (1.5)	CUL5 (1.4)	SLC25A15 (1.4)	RIC8A (1.1)	BET1L (1.1)	LRRC31 (0.9)	LRRC34 (0.9)
GO:0043186	P granule	0.13	0.900598	DMRT1 (8.5)	C11orf65 (5.0)	UIMC1 (1.3)	ENSG00000226403 (1.3)	ENSG00000184378 (1.2)	KDELC2 (1.0)	OBFC1 (0.9)	WT1-AS (0.8)	COG6 (0.8)	FIP1L1 (0.6)
GO:0060293	germ plasm	0.13	0.900598	DMRT1 (8.5)	C11orf65 (5.0)	UIMC1 (1.3)	ENSG00000226403 (1.3)	ENSG00000184378 (1.2)	KDELC2 (1.0)	OBFC1 (0.9)	WT1-AS (0.8)	COG6 (0.8)	FIP1L1 (0.6)
GO:0045495	pole plasm	0.13	0.900598	DMRT1 (8.5)	C11orf65 (5.0)	UIMC1 (1.3)	ENSG00000226403 (1.3)	ENSG00000184378 (1.2)	KDELC2 (1.0)	OBFC1 (0.9)	WT1-AS (0.8)	COG6 (0.8)	FIP1L1 (0.6)
GO:0043401	steroid hormone mediated signaling pathway	0.13	0.900598	SIRT3 (2.3)	GREB1 (2.3)	TERT (1.9)	LRRC31 (1.7)	TNRC6B (1.6)	SLC25A15 (1.4)	SULT1B1 (1.3)	LNX1 (1.3)	LRRC34 (1.0)	FOXO1 (1.0)
ENSG00000130382	MLLT1 PPI subnetwork	0.13	0.900598	TNRC6B (2.1)	CUL5 (1.9)	FIP1L1 (1.5)	SH3PXD2A (1.4)	SLC38A2 (1.3)	TERT (1.2)	MYNN (1.1)	FOXO1 (1.1)	UIMC1 (1.1)	LNX1 (1.0)
GO:0035601	protein deacylation	0.13	0.900598	LINC00339 (1.8)	TERT (1.6)	SH3PXD2A (1.6)	OBFC1 (1.3)	SIRT3 (1.2)	SLC38A1 (1.1)	TNRC6B (1.1)	RIC8A (1.1)	DMRT1 (1.1)	ZNF346 (0.9)
MP:0004163	abnormal adenohypophysis morphology	0.13	0.900598	SALL1 (2.4)	ENSG00000226403 (2.1)	SCGB1C1 (1.5)	ODF3 (1.4)	ENSG00000228397 (1.2)	SYNE1 (1.1)	BET1L (1.1)	LINC00339 (1.0)	LNX1 (0.9)	KANK1 (0.9)
ENSG00000025800	KPNA6 PPI subnetwork	0.13	0.900598	SLC25A15 (2.4)	CUL5 (2.3)	ATM (1.9)	MRPS31 (1.7)	PSMD13 (1.5)	NPAT (1.5)	ACAT1 (1.3)	UIMC1 (1.2)	FIP1L1 (1.2)	LINC00339 (1.1)
ENSG00000103479	RBL2 PPI subnetwork	0.13	0.900598	NPAT (2.6)	FIP1L1 (2.2)	MRPS31 (2.2)	UIMC1 (2.0)	DMRT1 (1.6)	KDELC2 (1.3)	WT1-AS (1.1)	SLC25A15 (0.9)	ATM (0.9)	HK3 (0.7)
GO:0006342	chromatin silencing	0.13	0.900598	LRRC34 (3.0)	ODF3 (2.9)	TERT (2.3)	RIC8A (1.5)	BET1L (1.4)	SULT1B1 (1.3)	SIRT3 (1.1)	FIP1L1 (1.0)	CUL5 (1.0)	C11orf65 (0.9)
GO:0032986	protein-DNA complex disassembly	0.13	0.900598	ODF3 (3.2)	TNRC6B (1.8)	ENSG00000258096 (1.8)	ENSG00000228397 (1.5)	FIP1L1 (1.3)	TERT (1.2)	DMRT1 (1.1)	CUL5 (1.1)	ENSG00000184378 (1.1)	GREB1 (0.7)
GO:0031498	chromatin disassembly	0.13	0.900598	ODF3 (3.2)	TNRC6B (1.8)	ENSG00000258096 (1.8)	ENSG00000228397 (1.5)	FIP1L1 (1.3)	TERT (1.2)	DMRT1 (1.1)	CUL5 (1.1)	ENSG00000184378 (1.1)	GREB1 (0.7)
GO:0006337	nucleosome disassembly	0.13	0.900598	ODF3 (3.2)	TNRC6B (1.8)	ENSG00000258096 (1.8)	ENSG00000228397 (1.5)	FIP1L1 (1.3)	TERT (1.2)	DMRT1 (1.1)	CUL5 (1.1)	ENSG00000184378 (1.1)	GREB1 (0.7)
MP:0005292	improved glucose tolerance	0.13	0.900598	FOXO1 (2.8)	GREB1 (2.6)	ACAT1 (1.7)	SCGB1C1 (1.5)	CDC42-IT1 (1.5)	LNX1 (1.3)	LRRC31 (1.3)	HK3 (1.2)	SULT1B1 (1.0)	SLC38A2 (1.0)
GO:0000775	chromosome, centromeric region	0.13	0.900598	NPAT (2.0)	KDELC2 (1.6)	ATM (1.5)	FIP1L1 (1.0)	UIMC1 (1.0)	TERT (0.9)	ZNF346 (0.9)	SLC38A2 (0.9)	CUL5 (0.8)	ACAT1 (0.8)
MP:0004359	short ulna	0.13	0.900598	SALL1 (2.8)	WNT4 (2.6)	GREB1 (2.4)	SH3PXD2A (2.3)	FOXO1 (2.1)	SLC25A15 (1.7)	LRRC34 (1.7)	KANK1 (1.6)	ENSG00000226403 (1.5)	ENSG00000184378 (1.2)
KEGG_FRUCTOSE_AND_MANNOSE_METABOLISM	KEGG_FRUCTOSE_AND_MANNOSE_METABOLISM	0.13	0.900598	COG6 (2.8)	SLC25A15 (2.0)	SULT1B1 (1.8)	HK3 (1.5)	LNX1 (1.0)	CD44 (0.8)	ENSG00000228397 (0.8)	SIRT3 (0.8)	LRRC31 (0.6)	FOXO1 (0.6)
MP:0005565	increased blood urea nitrogen level	0.13	0.900598	ENSG00000226403 (2.3)	SYNE1 (2.3)	KANK1 (1.8)	FOXO1 (1.8)	SIRT3 (1.6)	SALL1 (1.3)	ENSG00000258096 (0.9)	CD44 (0.7)	MYNN (0.6)	ACAT1 (0.6)
ENSG00000095139	ARCN1 PPI subnetwork	0.13	0.900598	COG6 (4.7)	BET1L (3.8)	RIC8A (3.0)	ACAT1 (2.5)	ENSG00000258096 (2.4)	PSMD13 (2.1)	LINC00339 (2.1)	CUL5 (2.0)	SIRT3 (1.6)	MRPS31 (1.5)
ENSG00000197045	GMFB PPI subnetwork	0.13	0.900598	SULT1B1 (3.0)	RIC8A (1.9)	EXPH5 (1.5)	PSMD13 (1.4)	KANK1 (1.2)	SCGB1C1 (1.2)	OBFC1 (1.1)	ENSG00000184378 (1.0)	ENSG00000226403 (0.9)	TERT (0.8)
MP:0011096	complete embryonic lethality before somite formation	0.13	0.900598	KANK1 (2.3)	TERT (2.3)	PSMD13 (2.2)	NPAT (2.0)	SALL1 (1.9)	CUL5 (1.6)	SLC38A2 (1.5)	UIMC1 (1.4)	KDELC2 (1.3)	ATM (1.3)
ENSG00000159216	RUNX1 PPI subnetwork	0.13	0.900598	TNRC6B (4.0)	SLC38A2 (2.1)	CDC42-IT1 (1.7)	SALL1 (1.6)	FOXO1 (1.6)	ENSG00000258096 (1.5)	WNT4 (1.5)	CD44 (1.2)	WT1-AS (1.0)	CUL5 (0.9)
ENSG00000125485	DDX31 PPI subnetwork	0.13	0.900598	FIP1L1 (3.3)	ATM (1.5)	UIMC1 (1.3)	MRPS31 (1.2)	LINC00339 (1.1)	KANK1 (1.0)	DMRT1 (1.0)	CD44 (0.8)	SLC25A15 (0.8)	TERT (0.7)
REACTOME_P130CAS_LINKAGE_TO_MAPK_SIGNALING_FOR_INTEGRINS	REACTOME_P130CAS_LINKAGE_TO_MAPK_SIGNALING_FOR_INTEGRINS	0.13	0.900598	SCGB1C1 (1.7)	SYNE1 (1.6)	KANK1 (1.4)	C11orf65 (1.1)	COG6 (1.1)	SH3PXD2A (0.8)	BET1L (0.7)	ENSG00000228397 (0.6)	SALL1 (0.6)	CUL5 (0.6)
REACTOME_SYNTHESIS_OF_SUBSTRATES_IN_N:GLYCAN_BIOSYTHESIS	REACTOME_SYNTHESIS_OF_SUBSTRATES_IN_N:GLYCAN_BIOSYTHESIS	0.13	0.900598	COG6 (3.5)	BET1L (3.3)	LRRC31 (2.5)	LINC00339 (1.6)	ENSG00000258096 (1.2)	CUL5 (1.2)	ENSG00000228397 (1.1)	SLC25A15 (1.1)	RIC8A (1.0)	MYNN (0.8)
GO:0001501	skeletal system development	0.13	0.900598	SH3PXD2A (2.9)	WNT4 (2.0)	ENSG00000228397 (1.7)	SALL1 (1.6)	KANK1 (1.5)	LRRC31 (1.3)	LNX1 (1.1)	GREB1 (0.9)	FOXO1 (0.8)	SLC38A2 (0.7)
GO:0017119	Golgi transport complex	0.13	0.900598	COG6 (5.1)	BET1L (2.7)	MRPS31 (2.7)	MYNN (1.7)	LNX1 (1.4)	OBFC1 (1.4)	UIMC1 (1.4)	HK3 (1.4)	FIP1L1 (1.3)	ATM (1.3)
GO:0032201	telomere maintenance via semi-conservative replication	0.13	0.900598	NPAT (3.6)	OBFC1 (3.0)	KDELC2 (2.1)	ATM (2.0)	TERT (1.9)	LINC00339 (1.9)	ZNF346 (1.8)	ENSG00000228397 (1.8)	ENSG00000258096 (1.7)	MRPS31 (1.3)
ENSG00000179958	DCTPP1 PPI subnetwork	0.13	0.900598	COG6 (3.5)	ODF3 (1.9)	CUL5 (1.7)	LRRC31 (1.7)	SLC38A2 (1.6)	ATM (1.6)	EXPH5 (1.3)	ZNF346 (1.3)	LNX1 (1.3)	TNRC6B (1.3)
GO:0046782	regulation of viral transcription	0.13	0.900598	FIP1L1 (2.4)	RIC8A (2.3)	CUL5 (1.9)	MYNN (1.6)	PSMD13 (1.6)	BET1L (1.5)	DMRT1 (1.4)	TERT (1.2)	C11orf65 (1.1)	UIMC1 (1.0)
GO:0072401	signal transduction involved in DNA integrity checkpoint	0.13	0.900598	PSMD13 (3.2)	ENSG00000228397 (2.1)	CDC42 (1.7)	MYNN (1.7)	ZNF346 (1.7)	MRPS31 (1.4)	BET1L (1.1)	LINC00339 (1.1)	CUL5 (1.1)	CDC42-IT1 (1.1)
GO:0006977	DNA damage response, signal transduction by p53 class mediator resulting in cell cycle arrest	0.13	0.900598	PSMD13 (3.2)	ENSG00000228397 (2.1)	CDC42 (1.7)	MYNN (1.7)	ZNF346 (1.7)	MRPS31 (1.4)	BET1L (1.1)	LINC00339 (1.1)	CUL5 (1.1)	CDC42-IT1 (1.1)
GO:0072431	signal transduction involved in mitotic cell cycle G1/S transition DNA damage checkpoint	0.13	0.900598	PSMD13 (3.2)	ENSG00000228397 (2.1)	CDC42 (1.7)	MYNN (1.7)	ZNF346 (1.7)	MRPS31 (1.4)	BET1L (1.1)	LINC00339 (1.1)	CUL5 (1.1)	CDC42-IT1 (1.1)
GO:0072413	signal transduction involved in mitotic cell cycle checkpoint	0.13	0.900598	PSMD13 (3.2)	ENSG00000228397 (2.1)	CDC42 (1.7)	MYNN (1.7)	ZNF346 (1.7)	MRPS31 (1.4)	BET1L (1.1)	LINC00339 (1.1)	CUL5 (1.1)	CDC42-IT1 (1.1)
GO:0072474	signal transduction involved in mitotic cell cycle G1/S checkpoint	0.13	0.900598	PSMD13 (3.2)	ENSG00000228397 (2.1)	CDC42 (1.7)	MYNN (1.7)	ZNF346 (1.7)	MRPS31 (1.4)	BET1L (1.1)	LINC00339 (1.1)	CUL5 (1.1)	CDC42-IT1 (1.1)
GO:0072422	signal transduction involved in DNA damage checkpoint	0.13	0.900598	PSMD13 (3.2)	ENSG00000228397 (2.1)	CDC42 (1.7)	MYNN (1.7)	ZNF346 (1.7)	MRPS31 (1.4)	BET1L (1.1)	LINC00339 (1.1)	CUL5 (1.1)	CDC42-IT1 (1.1)
GO:0019320	hexose catabolic process	0.13	0.900598	C11orf65 (2.5)	SIRT3 (1.8)	LRRC34 (1.5)	OBFC1 (1.5)	COG6 (1.4)	ODF3 (1.4)	LNX1 (1.4)	SLC25A15 (1.1)	ACAT1 (1.0)	ENSG00000184378 (0.9)
ENSG00000105669	COPE PPI subnetwork	0.13	0.900598	BET1L (5.7)	COG6 (5.0)	RIC8A (4.0)	PSMD13 (2.5)	ATM (2.5)	ACAT1 (2.4)	LINC00339 (1.9)	SIRT3 (1.5)	CUL5 (1.5)	MYNN (1.4)
ENSG00000215902	ENSG00000215902 PPI subnetwork	0.13	0.900598	PSMD13 (2.4)	FIP1L1 (1.5)	SH3PXD2A (1.2)	SALL1 (1.1)	OBFC1 (1.1)	FOXO1 (1.0)	LINC00339 (0.9)	CDC42 (0.9)	TERT (0.8)	ZNF346 (0.8)
GO:0051591	response to cAMP	0.13	0.900598	WT1-AS (4.3)	CDC42-IT1 (2.7)	ENSG00000258096 (2.1)	WNT4 (2.0)	ODF3 (1.9)	SULT1B1 (1.8)	LRRC31 (1.3)	SH3PXD2A (0.9)	SCGB1C1 (0.8)	OBFC1 (0.8)
GO:0001936	regulation of endothelial cell proliferation	0.13	0.900598	GREB1 (1.8)	WNT4 (1.7)	COG6 (1.6)	LRRC31 (1.6)	ENSG00000184378 (1.4)	SALL1 (1.2)	KANK1 (1.0)	CUL5 (1.0)	SH3PXD2A (0.9)	TERT (0.8)
ENSG00000125503	PPP1R12C PPI subnetwork	0.13	0.900598	CD44 (2.3)	HK3 (1.9)	FOXO1 (1.7)	ACAT1 (1.6)	SLC38A1 (1.6)	SYNE1 (1.6)	ATM (1.6)	CDC42-IT1 (1.4)	ENSG00000226403 (1.2)	SLC38A2 (1.2)
GO:0005372	water transmembrane transporter activity	0.13	0.900598	EXPH5 (3.1)	C11orf65 (1.5)	ENSG00000226403 (1.3)	ENSG00000258096 (1.2)	ODF3 (1.1)	LRRC31 (1.0)	COG6 (0.9)	CD44 (0.9)	SCGB1C1 (0.8)	SALL1 (0.7)
GO:0019370	leukotriene biosynthetic process	0.13	0.900598	SCGB1C1 (2.3)	HK3 (2.2)	ENSG00000226403 (1.8)	OBFC1 (1.7)	SYNE1 (1.7)	ZNF346 (1.2)	GREB1 (1.2)	COG6 (1.1)	LNX1 (1.1)	LRRC34 (0.9)
GO:0043450	alkene biosynthetic process	0.13	0.900598	SCGB1C1 (2.3)	HK3 (2.2)	ENSG00000226403 (1.8)	OBFC1 (1.7)	SYNE1 (1.7)	ZNF346 (1.2)	GREB1 (1.2)	COG6 (1.1)	LNX1 (1.1)	LRRC34 (0.9)
GO:0000922	spindle pole	0.13	0.900598	NPAT (2.1)	LINC00339 (1.6)	ZNF346 (1.4)	ATM (1.4)	UIMC1 (1.4)	OBFC1 (1.2)	MRPS31 (1.2)	FIP1L1 (1.1)	KDELC2 (1.1)	COG6 (1.1)
ENSG00000104973	MED25 PPI subnetwork	0.13	0.900598	MRPS31 (2.6)	CUL5 (2.1)	UIMC1 (2.1)	BET1L (2.0)	NPAT (2.0)	MYNN (1.7)	ZNF346 (1.4)	FIP1L1 (1.2)	TNRC6B (0.9)	COG6 (0.8)
ENSG00000154429	C1orf96 PPI subnetwork	0.13	0.900598	CDC42 (1.9)	LINC00339 (1.8)	SLC38A1 (1.7)	LRRC34 (1.6)	CDC42-IT1 (1.4)	PSMD13 (1.4)	SALL1 (1.1)	SULT1B1 (0.9)	DMRT1 (0.8)	RIC8A (0.7)
GO:0022626	cytosolic ribosome	0.13	0.900598	ENSG00000226403 (2.1)	MYNN (1.6)	SULT1B1 (1.5)	BET1L (1.4)	KDELC2 (1.1)	LINC00339 (1.1)	DMRT1 (1.0)	SLC38A1 (1.0)	SLC25A15 (0.9)	CDC42 (0.7)
GO:0051385	response to mineralocorticoid stimulus	0.13	0.900598	C11orf65 (2.2)	ODF3 (2.1)	ENSG00000258096 (2.1)	WNT4 (1.7)	CDC42-IT1 (1.5)	SLC38A2 (1.3)	LRRC34 (1.1)	LINC00339 (1.1)	SLC25A15 (1.0)	ACAT1 (1.0)
MP:0011097	complete embryonic lethality before turning of embryo	0.13	0.900598	KANK1 (2.3)	TERT (2.0)	DMRT1 (1.9)	FIP1L1 (1.7)	SALL1 (1.7)	SULT1B1 (1.6)	HK3 (1.2)	UIMC1 (1.2)	NPAT (1.1)	SLC38A2 (0.9)
GO:0031575	mitotic cell cycle G1/S transition checkpoint	0.13	0.900598	PSMD13 (3.1)	MYNN (2.1)	MRPS31 (1.8)	ENSG00000228397 (1.7)	CDC42 (1.7)	ZNF346 (1.6)	CUL5 (1.5)	CDC42-IT1 (1.5)	BET1L (1.4)	RIC8A (1.4)
MP:0010763	abnormal hematopoietic stem cell physiology	0.13	0.900598	SLC25A15 (1.9)	LRRC34 (1.6)	SALL1 (1.5)	SLC38A2 (1.4)	CDC42-IT1 (1.4)	SH3PXD2A (1.1)	LNX1 (1.1)	LRRC31 (0.8)	GREB1 (0.8)	ZNF346 (0.7)
ENSG00000177971	IMP3 PPI subnetwork	0.13	0.900598	FIP1L1 (2.8)	MRPS31 (2.3)	CUL5 (1.7)	BET1L (1.6)	NPAT (1.5)	SCGB1C1 (1.5)	ATM (1.5)	DMRT1 (1.4)	CD44 (1.2)	KANK1 (0.9)
GO:0005925	focal adhesion	0.13	0.900598	KANK1 (2.6)	SYNE1 (2.1)	RIC8A (1.3)	HK3 (1.2)	FOXO1 (1.0)	SCGB1C1 (1.0)	SH3PXD2A (0.9)	CD44 (0.9)	BET1L (0.7)	SULT1B1 (0.7)
ENSG00000153071	DAB2 PPI subnetwork	0.13	0.900598	TERT (2.5)	SULT1B1 (2.3)	SCGB1C1 (1.7)	SYNE1 (1.6)	ODF3 (1.2)	MYNN (1.1)	WT1-AS (1.1)	BET1L (1.0)	C11orf65 (0.9)	CD44 (0.9)
GO:0030041	actin filament polymerization	0.13	0.900598	CDC42-IT1 (2.1)	CDC42 (2.0)	OBFC1 (1.5)	CUL5 (1.3)	ENSG00000258096 (1.3)	DMRT1 (1.2)	ODF3 (1.1)	TNRC6B (1.0)	ENSG00000228397 (0.9)	MYNN (0.9)
MP:0011386	increased metanephric mesenchyme apoptosis	0.13	0.900598	WT1-AS (8.3)	RIC8A (2.9)	SALL1 (2.4)	DMRT1 (2.0)	WNT4 (1.8)	ATM (1.4)	SLC38A2 (1.2)	CDC42 (1.2)	SLC38A1 (1.1)	SH3PXD2A (1.1)
GO:0006901	vesicle coating	0.13	0.900598	COG6 (6.5)	BET1L (5.6)	ENSG00000258096 (2.8)	RIC8A (1.6)	CUL5 (1.3)	CDC42 (1.2)	ACAT1 (1.2)	MYNN (1.1)	CDC42-IT1 (1.1)	ZNF346 (1.1)
ENSG00000123064	DDX54 PPI subnetwork	0.13	0.900598	FIP1L1 (3.1)	MRPS31 (2.0)	GREB1 (1.3)	ATM (1.3)	KANK1 (1.0)	UIMC1 (0.8)	NPAT (0.8)	ENSG00000226403 (0.7)	TERT (0.7)	DMRT1 (0.7)
ENSG00000196367	TRRAP PPI subnetwork	0.13	0.900598	SCGB1C1 (3.1)	UIMC1 (2.7)	ATM (2.0)	NPAT (2.0)	CUL5 (2.0)	FIP1L1 (1.8)	KDELC2 (1.6)	TNRC6B (1.4)	MRPS31 (1.1)	OBFC1 (1.0)
ENSG00000187790	FANCM PPI subnetwork	0.13	0.900598	NPAT (3.4)	OBFC1 (2.1)	KDELC2 (1.9)	TERT (1.9)	UIMC1 (1.9)	MYNN (1.9)	ZNF346 (1.8)	ATM (1.8)	LNX1 (1.6)	MRPS31 (1.5)
GO:0001076	RNA polymerase II transcription factor binding transcription factor activity	0.13	0.900598	TNRC6B (2.3)	MRPS31 (2.1)	FIP1L1 (2.1)	UIMC1 (1.7)	SLC38A2 (1.6)	WT1-AS (1.3)	NPAT (1.1)	ZNF346 (1.0)	FOXO1 (0.9)	CUL5 (0.8)
MP:0005264	glomerulosclerosis	0.13	0.900598	WT1-AS (5.8)	ENSG00000226403 (2.7)	BET1L (2.1)	ENSG00000258096 (1.7)	EXPH5 (1.5)	SYNE1 (1.2)	KDELC2 (1.2)	KANK1 (1.1)	DMRT1 (0.9)	RIC8A (0.9)
GO:0031123	RNA 3'-end processing	0.13	0.900598	UIMC1 (3.4)	LINC00339 (2.9)	MYNN (2.7)	CDC42-IT1 (2.6)	FIP1L1 (1.9)	CUL5 (1.5)	SLC38A1 (1.1)	COG6 (1.1)	MRPS31 (1.0)	LRRC31 (1.0)
ENSG00000131149	KIAA0182 PPI subnetwork	0.13	0.900598	FIP1L1 (2.5)	UIMC1 (2.1)	TNRC6B (1.9)	LINC00339 (1.9)	NPAT (1.6)	DMRT1 (1.6)	ZNF346 (1.3)	ENSG00000228397 (1.2)	TERT (1.0)	CUL5 (1.0)
GO:0002753	cytoplasmic pattern recognition receptor signaling pathway	0.13	0.900598	ENSG00000184378 (1.6)	WT1-AS (1.3)	ENSG00000258096 (1.3)	RIC8A (1.2)	CD44 (1.1)	MYNN (1.1)	SULT1B1 (0.9)	BET1L (0.9)	LRRC31 (0.8)	OBFC1 (0.8)
GO:0070423	nucleotide-binding oligomerization domain containing signaling pathway	0.13	0.900598	ENSG00000184378 (1.6)	WT1-AS (1.3)	ENSG00000258096 (1.3)	RIC8A (1.2)	CD44 (1.1)	MYNN (1.1)	SULT1B1 (0.9)	BET1L (0.9)	LRRC31 (0.8)	OBFC1 (0.8)
GO:0035872	nucleotide-binding domain, leucine rich repeat containing receptor signaling pathway	0.13	0.900598	ENSG00000184378 (1.6)	WT1-AS (1.3)	ENSG00000258096 (1.3)	RIC8A (1.2)	CD44 (1.1)	MYNN (1.1)	SULT1B1 (0.9)	BET1L (0.9)	LRRC31 (0.8)	OBFC1 (0.8)
ENSG00000169249	ZRSR2 PPI subnetwork	0.13	0.900598	TERT (2.9)	UIMC1 (2.6)	CUL5 (2.5)	FIP1L1 (1.8)	MYNN (1.7)	PSMD13 (1.6)	MRPS31 (1.4)	EXPH5 (0.8)	ATM (0.8)	SYNE1 (0.7)
MP:0002804	abnormal motor learning	0.13	0.900598	CDC42 (2.4)	LINC00339 (2.2)	CUL5 (1.8)	SYNE1 (1.8)	SALL1 (1.4)	WNT4 (1.4)	CD44 (1.2)	SULT1B1 (1.1)	TNRC6B (1.0)	SLC38A2 (0.9)
MP:0004568	fusion of glossopharyngeal and vagus nerve	0.13	0.900598	WNT4 (2.3)	WT1-AS (2.2)	CDC42-IT1 (1.8)	ENSG00000226403 (1.7)	SALL1 (1.6)	HK3 (1.4)	DMRT1 (1.2)	ODF3 (1.1)	TNRC6B (0.9)	BET1L (0.9)
MP:0009339	decreased splenocyte number	0.13	0.900598	FOXO1 (3.6)	NPAT (2.1)	TNRC6B (1.7)	CD44 (1.5)	SALL1 (1.3)	SLC25A15 (1.1)	SLC38A1 (1.0)	SLC38A2 (0.9)	LRRC31 (0.8)	LINC00339 (0.7)
GO:0017127	cholesterol transporter activity	0.13	0.900598	SLC25A15 (3.2)	LNX1 (1.6)	LRRC31 (1.5)	GREB1 (1.4)	LRRC34 (1.2)	WT1-AS (1.2)	WNT4 (1.2)	MRPS31 (0.9)	SULT1B1 (0.9)	ODF3 (0.9)
GO:0016410	N-acyltransferase activity	0.13	0.900598	SIRT3 (2.1)	SALL1 (1.7)	RIC8A (1.7)	FIP1L1 (1.5)	OBFC1 (1.5)	TNRC6B (1.4)	KDELC2 (1.3)	DMRT1 (1.2)	LINC00339 (1.0)	EXPH5 (1.0)
ENSG00000107807	TLX1 PPI subnetwork	0.13	0.900598	WT1-AS (3.7)	UIMC1 (2.1)	KANK1 (1.7)	FOXO1 (1.6)	CUL5 (1.4)	EXPH5 (1.2)	SIRT3 (1.1)	MYNN (1.0)	DMRT1 (0.9)	GREB1 (0.8)
ENSG00000198788	MUC2 PPI subnetwork	0.13	0.900598	SULT1B1 (4.2)	SCGB1C1 (2.1)	LNX1 (1.5)	EXPH5 (1.4)	NPAT (1.1)	SLC38A1 (1.0)	ENSG00000228397 (1.0)	OBFC1 (0.9)	LRRC31 (0.9)	KDELC2 (0.9)
GO:0042809	vitamin D receptor binding	0.13	0.900598	TNRC6B (3.8)	CUL5 (2.6)	MRPS31 (2.2)	CDC42-IT1 (1.7)	FOXO1 (1.5)	KDELC2 (1.5)	UIMC1 (1.4)	FIP1L1 (1.2)	SALL1 (0.9)	ACAT1 (0.9)
ENSG00000184967	NOC4L PPI subnetwork	0.13	0.900598	FIP1L1 (2.2)	CD44 (1.8)	MRPS31 (1.6)	TERT (1.6)	DMRT1 (1.5)	MYNN (1.5)	CUL5 (1.4)	ATM (1.2)	NPAT (1.1)	KANK1 (1.1)
GO:0051603	proteolysis involved in cellular protein catabolic process	0.13	0.900598	CUL5 (2.7)	MYNN (2.7)	LNX1 (2.1)	COG6 (2.0)	ZNF346 (1.9)	CDC42 (1.8)	PSMD13 (1.7)	UIMC1 (1.5)	FIP1L1 (1.5)	SLC38A2 (1.3)
GO:0006473	protein acetylation	0.13	0.900598	MYNN (2.5)	UIMC1 (1.9)	TERT (1.7)	OBFC1 (1.7)	CDC42-IT1 (1.4)	FIP1L1 (1.4)	EXPH5 (1.4)	TNRC6B (1.3)	NPAT (1.3)	LINC00339 (1.2)
ENSG00000137975	CLCA2 PPI subnetwork	0.13	0.900598	GREB1 (3.0)	SLC38A1 (2.0)	LNX1 (1.9)	SLC25A15 (1.8)	ENSG00000258096 (1.4)	KANK1 (1.4)	TNRC6B (1.3)	SCGB1C1 (1.1)	LRRC34 (0.9)	NPAT (0.9)
ENSG00000175390	EIF3F PPI subnetwork	0.13	0.900598	KANK1 (2.3)	WT1-AS (2.3)	SLC38A1 (1.3)	CDC42 (1.2)	MYNN (1.1)	ENSG00000226403 (1.0)	PSMD13 (1.0)	CD44 (0.9)	DMRT1 (0.9)	ENSG00000228397 (0.8)
REACTOME_FACTORS_INVOLVED_IN_MEGAKARYOCYTE_DEVELOPMENT_AND_PLATELET_PRODUCTION	REACTOME_FACTORS_INVOLVED_IN_MEGAKARYOCYTE_DEVELOPMENT_AND_PLATELET_PRODUCTION	0.13	0.900598	ENSG00000228397 (1.6)	SLC25A15 (1.6)	KDELC2 (1.6)	LINC00339 (1.6)	SULT1B1 (1.5)	WT1-AS (1.5)	HK3 (1.0)	FIP1L1 (1.0)	CDC42 (0.9)	LRRC34 (0.9)
GO:0006906	vesicle fusion	0.13	0.900598	LINC00339 (3.7)	COG6 (2.5)	CDC42-IT1 (2.0)	ENSG00000228397 (1.8)	CD44 (1.8)	TERT (1.1)	EXPH5 (1.0)	KDELC2 (1.0)	OBFC1 (1.0)	BET1L (0.9)
ENSG00000169083	AR PPI subnetwork	0.13	0.900598	TNRC6B (3.7)	FIP1L1 (2.5)	CD44 (1.9)	SLC38A2 (1.7)	CDC42 (1.7)	FOXO1 (1.3)	SH3PXD2A (1.2)	ENSG00000184378 (1.1)	COG6 (0.9)	MRPS31 (0.8)
ENSG00000067057	PFKP PPI subnetwork	0.14	0.900598	CDC42-IT1 (3.3)	RIC8A (2.3)	OBFC1 (2.0)	ACAT1 (1.6)	EXPH5 (1.4)	CD44 (1.3)	TERT (1.3)	FOXO1 (1.1)	LRRC34 (1.1)	SIRT3 (1.0)
GO:0002467	germinal center formation	0.14	0.900598	ENSG00000258096 (3.3)	SULT1B1 (2.0)	LRRC34 (1.8)	COG6 (1.4)	TERT (1.2)	SYNE1 (1.0)	CD44 (1.0)	MYNN (0.9)	C11orf65 (0.8)	LINC00339 (0.8)
GO:0045137	development of primary sexual characteristics	0.14	0.900598	DMRT1 (4.6)	GREB1 (4.0)	WT1-AS (2.9)	ODF3 (2.3)	KANK1 (2.3)	WNT4 (1.9)	ENSG00000228397 (1.9)	ENSG00000226403 (1.3)	LNX1 (1.2)	SALL1 (1.2)
MP:0008476	increased spleen red pulp amount	0.14	0.900598	ENSG00000184378 (2.5)	LRRC31 (1.9)	BET1L (1.5)	CD44 (1.4)	ZNF346 (1.3)	RIC8A (1.1)	SLC25A15 (1.1)	NPAT (1.1)	LRRC34 (1.0)	LNX1 (0.9)
ENSG00000087269	NOP14 PPI subnetwork	0.14	0.900598	FIP1L1 (2.5)	MRPS31 (2.1)	NPAT (1.5)	ATM (1.5)	BET1L (1.5)	DMRT1 (1.4)	TERT (1.4)	ENSG00000226403 (1.3)	SLC25A15 (1.3)	LINC00339 (1.2)
GO:0005543	phospholipid binding	0.14	0.900598	CDC42-IT1 (1.9)	LNX1 (1.9)	HK3 (1.8)	KDELC2 (1.7)	SYNE1 (1.5)	ENSG00000258096 (1.3)	KANK1 (1.2)	WT1-AS (1.2)	CDC42 (1.0)	GREB1 (0.9)
ENSG00000099624	ATP5D PPI subnetwork	0.14	0.900598	ACAT1 (3.9)	COG6 (1.9)	CDC42 (1.7)	MRPS31 (1.5)	LNX1 (1.4)	ENSG00000226403 (1.4)	UIMC1 (1.3)	SLC38A2 (1.2)	GREB1 (1.0)	WT1-AS (0.9)
MP:0001919	abnormal reproductive system physiology	0.14	0.900598	GREB1 (7.5)	WT1-AS (5.0)	EXPH5 (2.3)	LRRC31 (2.1)	SLC38A2 (1.5)	FOXO1 (1.5)	ODF3 (1.4)	CDC42-IT1 (1.4)	SULT1B1 (1.2)	DMRT1 (1.1)
MP:0008211	decreased mature B cell number	0.14	0.900598	TERT (2.6)	FOXO1 (2.2)	ENSG00000228397 (2.0)	SLC38A1 (1.8)	CD44 (1.7)	LRRC34 (1.2)	HK3 (1.1)	ATM (1.1)	GREB1 (1.1)	SULT1B1 (0.5)
GO:2000243	positive regulation of reproductive process	0.14	0.900598	CUL5 (2.1)	LINC00339 (1.8)	DMRT1 (1.8)	WT1-AS (1.5)	RIC8A (1.5)	TNRC6B (1.4)	FIP1L1 (1.4)	GREB1 (1.3)	BET1L (1.2)	PSMD13 (0.9)
MP:0005656	decreased aggression	0.14	0.900598	GREB1 (2.6)	LINC00339 (2.3)	FOXO1 (2.3)	SIRT3 (1.8)	KANK1 (1.4)	MRPS31 (1.2)	TERT (1.1)	CD44 (0.8)	SYNE1 (0.8)	OBFC1 (0.7)
MP:0006317	decreased urine sodium level	0.14	0.900598	SALL1 (2.6)	SYNE1 (2.5)	ENSG00000226403 (1.4)	SLC38A2 (1.3)	LNX1 (1.1)	SCGB1C1 (1.0)	ENSG00000258096 (0.8)	SH3PXD2A (0.7)	CDC42-IT1 (0.6)	GREB1 (0.6)
ENSG00000105376	ICAM5 PPI subnetwork	0.14	0.900598	HK3 (3.2)	CD44 (2.9)	SLC38A1 (2.6)	ENSG00000226403 (2.2)	KANK1 (1.6)	SLC38A2 (1.4)	CDC42 (1.2)	SULT1B1 (1.1)	ACAT1 (1.0)	FOXO1 (1.0)
GO:0048608	reproductive structure development	0.14	0.900598	GREB1 (4.4)	DMRT1 (4.4)	WT1-AS (2.9)	ENSG00000228397 (2.7)	KANK1 (2.3)	WNT4 (1.9)	ODF3 (1.9)	ENSG00000226403 (1.3)	SH3PXD2A (1.3)	ENSG00000258096 (1.3)
ENSG00000198478	SH3BGRL2 PPI subnetwork	0.14	0.900598	SULT1B1 (4.6)	SYNE1 (1.5)	LRRC31 (1.5)	CD44 (1.1)	OBFC1 (0.9)	LNX1 (0.9)	SLC38A1 (0.9)	NPAT (0.7)	CDC42-IT1 (0.6)	FOXO1 (0.5)
ENSG00000080603	SRCAP PPI subnetwork	0.14	0.900598	SCGB1C1 (2.7)	CUL5 (1.9)	FIP1L1 (1.9)	ENSG00000258096 (1.5)	UIMC1 (1.4)	MRPS31 (1.2)	TNRC6B (1.2)	ODF3 (1.1)	KDELC2 (1.0)	CDC42 (0.9)
ENSG00000105085	MED26 PPI subnetwork	0.14	0.900598	BET1L (3.0)	MRPS31 (2.5)	RIC8A (2.3)	CUL5 (2.3)	NPAT (2.2)	MYNN (2.1)	FIP1L1 (1.5)	ZNF346 (1.2)	PSMD13 (1.2)	UIMC1 (1.1)
ENSG00000093167	LRRFIP2 PPI subnetwork	0.14	0.900598	SULT1B1 (3.7)	SCGB1C1 (3.0)	SYNE1 (2.2)	TERT (1.7)	OBFC1 (1.5)	LNX1 (1.5)	EXPH5 (1.3)	WT1-AS (1.2)	UIMC1 (0.9)	KDELC2 (0.5)
ENSG00000196235	SUPT5H PPI subnetwork	0.14	0.900598	FIP1L1 (3.8)	RIC8A (2.6)	PSMD13 (2.3)	CUL5 (2.2)	NPAT (2.1)	TERT (1.6)	MRPS31 (1.5)	CDC42-IT1 (1.0)	DMRT1 (0.9)	UIMC1 (0.9)
GO:0033273	response to vitamin	0.14	0.900598	DMRT1 (2.9)	WNT4 (1.8)	SH3PXD2A (1.3)	CDC42-IT1 (1.3)	ENSG00000226403 (1.3)	ENSG00000184378 (1.0)	CD44 (1.0)	SLC25A15 (0.9)	TNRC6B (0.7)	LINC00339 (0.6)
ENSG00000198336	MYL4 PPI subnetwork	0.14	0.900598	GREB1 (2.8)	SLC38A1 (2.0)	LNX1 (2.0)	SLC25A15 (1.8)	ENSG00000258096 (1.5)	KANK1 (1.5)	TNRC6B (1.4)	SCGB1C1 (1.4)	SLC38A2 (1.2)	ODF3 (1.0)
GO:0006607	NLS-bearing substrate import into nucleus	0.14	0.900598	ODF3 (2.8)	CUL5 (2.0)	FOXO1 (1.8)	ENSG00000184378 (1.6)	KDELC2 (1.6)	C11orf65 (1.5)	COG6 (1.5)	MYNN (1.4)	ATM (1.3)	SLC38A1 (1.1)
MP:0009743	preaxial polydactyly	0.14	0.900598	LRRC34 (2.7)	SIRT3 (2.1)	OBFC1 (1.8)	TERT (1.5)	SH3PXD2A (1.5)	EXPH5 (1.4)	LINC00339 (1.4)	C11orf65 (1.3)	SULT1B1 (1.3)	WNT4 (1.1)
KEGG_HOMOLOGOUS_RECOMBINATION	KEGG_HOMOLOGOUS_RECOMBINATION	0.14	0.900598	NPAT (3.2)	TERT (2.8)	OBFC1 (2.3)	ATM (2.1)	MRPS31 (2.0)	UIMC1 (1.6)	LINC00339 (1.4)	KDELC2 (1.3)	SIRT3 (1.1)	ZNF346 (0.8)
GO:0060537	muscle tissue development	0.14	0.900598	WT1-AS (2.2)	SH3PXD2A (1.8)	KANK1 (1.6)	ENSG00000226403 (1.5)	TNRC6B (1.2)	SYNE1 (1.2)	GREB1 (1.0)	FOXO1 (0.8)	WNT4 (0.7)	OBFC1 (0.7)
REACTOME_PROSTANOID_METABOLISM	REACTOME_PROSTANOID_METABOLISM	0.14	0.900598	HK3 (3.3)	ENSG00000226403 (2.4)	SIRT3 (1.7)	SULT1B1 (1.6)	ENSG00000228397 (1.5)	GREB1 (1.3)	WT1-AS (1.2)	OBFC1 (1.2)	WNT4 (1.1)	CD44 (1.0)
MP:0005103	abnormal retinal pigmentation	0.14	0.900598	LRRC34 (2.3)	SALL1 (2.1)	EXPH5 (1.7)	KANK1 (1.5)	SYNE1 (1.2)	LNX1 (1.2)	GREB1 (1.2)	ATM (1.0)	WT1-AS (1.0)	ACAT1 (0.8)
ENSG00000196498	NCOR2 PPI subnetwork	0.14	0.900598	TNRC6B (5.0)	FOXO1 (3.3)	SLC38A2 (3.2)	WNT4 (1.6)	SH3PXD2A (1.5)	LRRC31 (1.4)	MYNN (1.3)	TERT (1.2)	COG6 (1.2)	GREB1 (1.1)
ENSG00000164162	ANAPC10 PPI subnetwork	0.14	0.900598	COG6 (2.5)	CDC42 (1.8)	OBFC1 (1.3)	KANK1 (1.1)	TERT (1.1)	ENSG00000228397 (1.0)	KDELC2 (1.0)	SLC38A2 (1.0)	MRPS31 (0.9)	LINC00339 (0.8)
GO:0032039	integrator complex	0.14	0.900598	MRPS31 (4.7)	OBFC1 (1.8)	FIP1L1 (1.8)	NPAT (1.7)	COG6 (1.5)	CUL5 (1.4)	MYNN (1.3)	ATM (1.1)	LNX1 (1.1)	LRRC31 (0.7)
MP:0003396	abnormal embryonic hematopoiesis	0.14	0.900598	SLC38A2 (2.1)	UIMC1 (1.6)	SCGB1C1 (1.4)	CDC42-IT1 (1.2)	LINC00339 (1.1)	FOXO1 (0.8)	ENSG00000228397 (0.8)	KDELC2 (0.8)	CDC42 (0.7)	WT1-AS (0.7)
ENSG00000186716	BCR PPI subnetwork	0.14	0.900598	KANK1 (2.6)	CD44 (2.2)	HK3 (2.0)	LRRC34 (1.6)	GREB1 (1.5)	ENSG00000226403 (1.3)	SLC38A1 (1.2)	RIC8A (1.1)	CDC42 (1.1)	SCGB1C1 (1.0)
ENSG00000117020	AKT3 PPI subnetwork	0.14	0.900598	FOXO1 (3.3)	SH3PXD2A (3.0)	RIC8A (2.3)	WT1-AS (1.8)	MYNN (1.8)	CDC42-IT1 (1.6)	SULT1B1 (1.6)	ENSG00000184378 (1.5)	TNRC6B (1.5)	OBFC1 (1.5)
MP:0009789	decreased susceptibility to bacterial infection induced morbidity/mortality	0.14	0.900598	HK3 (5.0)	CD44 (3.0)	TERT (2.0)	ENSG00000184378 (1.8)	KDELC2 (1.6)	WNT4 (1.5)	ENSG00000226403 (1.3)	UIMC1 (1.2)	DMRT1 (0.9)	SIRT3 (0.9)
GO:0044450	microtubule organizing center part	0.14	0.900598	OBFC1 (3.0)	ATM (2.6)	SIRT3 (1.7)	NPAT (1.7)	LRRC34 (1.4)	SYNE1 (1.3)	COG6 (1.3)	LINC00339 (1.1)	ODF3 (0.9)	CUL5 (0.9)
GO:0043632	modification-dependent macromolecule catabolic process	0.14	0.900598	MYNN (2.7)	CUL5 (2.6)	LNX1 (2.2)	ZNF346 (2.0)	COG6 (1.9)	CDC42 (1.9)	FIP1L1 (1.7)	UIMC1 (1.7)	PSMD13 (1.7)	SLC38A2 (1.4)
MP:0011501	increased glomerular capsule space	0.14	0.900598	SYNE1 (3.1)	ENSG00000226403 (2.7)	DMRT1 (1.7)	ZNF346 (1.6)	SCGB1C1 (1.4)	LINC00339 (1.1)	SIRT3 (1.1)	KANK1 (1.0)	TERT (1.0)	MYNN (0.8)
ENSG00000114127	XRN1 PPI subnetwork	0.14	0.900598	TERT (2.9)	FIP1L1 (2.1)	UIMC1 (1.9)	ATM (1.8)	CDC42-IT1 (1.7)	CDC42 (1.7)	PSMD13 (1.7)	CUL5 (1.3)	KDELC2 (1.0)	C11orf65 (0.9)
ENSG00000009954	BAZ1B PPI subnetwork	0.14	0.900598	FIP1L1 (2.6)	GREB1 (2.0)	SH3PXD2A (1.7)	TNRC6B (1.3)	ENSG00000228397 (1.2)	TERT (1.1)	CUL5 (0.8)	WNT4 (0.8)	SALL1 (0.8)	ENSG00000258096 (0.7)
ENSG00000123124	WWP1 PPI subnetwork	0.14	0.900598	UIMC1 (2.3)	WT1-AS (2.2)	LRRC34 (1.4)	WNT4 (1.4)	SH3PXD2A (1.1)	ZNF346 (1.0)	SALL1 (1.0)	KANK1 (0.9)	TERT (0.9)	LNX1 (0.7)
ENSG00000176248	ANAPC2 PPI subnetwork	0.14	0.900598	COG6 (2.1)	MRPS31 (2.0)	FIP1L1 (1.9)	UIMC1 (1.6)	OBFC1 (1.3)	KANK1 (1.2)	LRRC34 (1.2)	KDELC2 (1.1)	ENSG00000184378 (0.8)	GREB1 (0.7)
GO:0046632	alpha-beta T cell differentiation	0.14	0.900598	ENSG00000258096 (2.0)	SLC38A1 (1.7)	HK3 (1.7)	CD44 (1.5)	TERT (1.3)	FOXO1 (1.2)	ATM (0.9)	OBFC1 (0.8)	SULT1B1 (0.7)	ZNF346 (0.6)
MP:0002675	asthenozoospermia	0.14	0.900598	ODF3 (5.2)	DMRT1 (2.9)	GREB1 (2.3)	ENSG00000184378 (2.3)	LRRC34 (1.4)	C11orf65 (1.1)	ENSG00000258096 (0.8)	WT1-AS (0.7)	UIMC1 (0.5)	SULT1B1 (0.4)
MP:0003936	abnormal reproductive system development	0.14	0.900598	DMRT1 (5.1)	SALL1 (3.9)	EXPH5 (2.6)	WT1-AS (2.0)	WNT4 (1.9)	SH3PXD2A (1.8)	FOXO1 (1.2)	ODF3 (1.1)	GREB1 (1.1)	BET1L (0.8)
GO:0032963	collagen metabolic process	0.14	0.900598	ENSG00000228397 (3.2)	SULT1B1 (2.4)	SH3PXD2A (2.1)	KDELC2 (1.8)	HK3 (1.4)	ODF3 (1.4)	ZNF346 (1.2)	DMRT1 (1.2)	WT1-AS (1.2)	C11orf65 (1.1)
ENSG00000130772	MED18 PPI subnetwork	0.14	0.900598	MRPS31 (2.9)	UIMC1 (2.7)	NPAT (2.0)	CUL5 (1.9)	ZNF346 (1.7)	MYNN (1.6)	ODF3 (1.5)	BET1L (1.5)	FIP1L1 (1.5)	TNRC6B (1.0)
ENSG00000167751	KLK2 PPI subnetwork	0.14	0.900598	GREB1 (3.4)	WNT4 (1.6)	ENSG00000184378 (1.4)	SALL1 (1.3)	ODF3 (1.1)	BET1L (1.1)	C11orf65 (0.9)	LNX1 (0.7)	SCGB1C1 (0.7)	LRRC31 (0.5)
GO:0006338	chromatin remodeling	0.14	0.900598	ENSG00000228397 (2.8)	TNRC6B (2.1)	TERT (2.0)	NPAT (1.9)	DMRT1 (1.8)	FIP1L1 (1.7)	ENSG00000226403 (1.6)	ENSG00000258096 (1.5)	ATM (1.4)	KDELC2 (1.2)
GO:0001727	lipid kinase activity	0.14	0.900598	NPAT (1.9)	MYNN (1.9)	RIC8A (1.6)	TNRC6B (1.6)	SLC38A1 (1.5)	ZNF346 (1.5)	LRRC31 (1.5)	HK3 (1.3)	SH3PXD2A (1.3)	COG6 (1.1)
GO:0051648	vesicle localization	0.14	0.900598	COG6 (5.8)	BET1L (3.8)	CDC42-IT1 (2.0)	ATM (1.4)	RIC8A (1.2)	LRRC31 (1.2)	TERT (1.0)	GREB1 (0.9)	CUL5 (0.9)	OBFC1 (0.8)
ENSG00000143379	SETDB1 PPI subnetwork	0.14	0.900598	SIRT3 (2.7)	ENSG00000228397 (1.9)	SLC38A2 (1.8)	CUL5 (1.8)	OBFC1 (1.6)	FIP1L1 (1.5)	TERT (1.5)	DMRT1 (1.4)	NPAT (1.3)	LNX1 (1.1)
GO:2000241	regulation of reproductive process	0.14	0.900598	CUL5 (2.1)	WT1-AS (2.0)	DMRT1 (1.5)	TNRC6B (1.4)	FIP1L1 (1.3)	LINC00339 (1.3)	RIC8A (1.2)	UIMC1 (1.1)	GREB1 (1.1)	SALL1 (0.9)
MP:0003628	abnormal leukocyte adhesion	0.14	0.900598	HK3 (3.3)	OBFC1 (2.8)	CD44 (2.7)	SULT1B1 (2.4)	SYNE1 (1.4)	ENSG00000226403 (0.7)	TNRC6B (0.6)	LRRC34 (0.5)	RIC8A (0.4)	SH3PXD2A (0.3)
ENSG00000080345	RIF1 PPI subnetwork	0.14	0.900598	PSMD13 (2.3)	ZNF346 (1.6)	OBFC1 (1.6)	UIMC1 (1.5)	LRRC31 (1.4)	MRPS31 (1.4)	RIC8A (1.2)	SULT1B1 (1.0)	WNT4 (1.0)	SALL1 (0.9)
ENSG00000075651	PLD1 PPI subnetwork	0.14	0.900598	RIC8A (2.4)	WT1-AS (2.3)	CDC42 (2.2)	CD44 (1.9)	SULT1B1 (1.4)	CDC42-IT1 (1.3)	BET1L (1.0)	SYNE1 (0.9)	ENSG00000258096 (0.9)	EXPH5 (0.7)
ENSG00000112658	SRF PPI subnetwork	0.14	0.900598	CD44 (2.0)	SYNE1 (1.8)	LRRC31 (1.7)	SH3PXD2A (1.4)	BET1L (1.1)	WT1-AS (1.1)	TNRC6B (1.0)	OBFC1 (1.0)	DMRT1 (0.9)	ATM (0.8)
REACTOME_SIGNALING_BY_ERBB4	REACTOME_SIGNALING_BY_ERBB4	0.14	0.900598	GREB1 (2.9)	FOXO1 (2.7)	RIC8A (1.6)	SLC38A2 (1.6)	WT1-AS (1.5)	TNRC6B (1.2)	CDC42-IT1 (1.1)	MYNN (1.1)	SULT1B1 (1.1)	CDC42 (1.0)
ENSG00000081237	PTPRC PPI subnetwork	0.14	0.900598	HK3 (2.2)	WT1-AS (2.2)	SLC38A1 (2.0)	CD44 (1.6)	ATM (1.4)	WNT4 (1.3)	FOXO1 (1.1)	C11orf65 (1.1)	SLC25A15 (0.8)	RIC8A (0.8)
MP:0003091	abnormal cell migration	0.14	0.900598	SYNE1 (2.5)	KANK1 (2.4)	CD44 (2.1)	SH3PXD2A (2.1)	RIC8A (1.5)	BET1L (1.5)	TERT (1.2)	CDC42-IT1 (1.0)	ENSG00000226403 (1.0)	CDC42 (1.0)
REACTOME_RNA_POL_II_CTD_PHOSPHORYLATION_AND_INTERACTION_WITH_CE	REACTOME_RNA_POL_II_CTD_PHOSPHORYLATION_AND_INTERACTION_WITH_CE	0.14	0.900598	PSMD13 (3.0)	RIC8A (2.9)	MRPS31 (2.7)	BET1L (2.7)	FIP1L1 (2.4)	MYNN (2.0)	SIRT3 (2.0)	DMRT1 (1.6)	SLC25A15 (1.5)	NPAT (1.3)
GO:0019941	modification-dependent protein catabolic process	0.14	0.900598	MYNN (2.7)	CUL5 (2.6)	LNX1 (2.2)	ZNF346 (2.1)	COG6 (2.0)	CDC42 (1.8)	PSMD13 (1.7)	UIMC1 (1.6)	FIP1L1 (1.5)	SLC38A2 (1.4)
GO:0046625	sphingolipid binding	0.14	0.900598	SALL1 (1.9)	WNT4 (1.8)	CD44 (1.5)	FOXO1 (1.5)	ODF3 (1.4)	ZNF346 (1.3)	CDC42 (1.2)	TNRC6B (1.1)	SLC38A1 (1.1)	FIP1L1 (0.9)
GO:0051287	NAD binding	0.14	0.900598	ACAT1 (6.5)	SIRT3 (2.9)	KANK1 (2.7)	LRRC34 (2.1)	SULT1B1 (2.0)	ENSG00000258096 (1.5)	LNX1 (1.4)	TERT (1.4)	COG6 (1.1)	KDELC2 (1.1)
REACTOME_UBIQUITIN_MEDIATED_DEGRADATION_OF_PHOSPHORYLATED_CDC25A	REACTOME_UBIQUITIN_MEDIATED_DEGRADATION_OF_PHOSPHORYLATED_CDC25A	0.14	0.900598	PSMD13 (6.0)	CDC42 (2.3)	MRPS31 (1.4)	MYNN (1.2)	BET1L (1.0)	CUL5 (0.9)	ENSG00000228397 (0.9)	WNT4 (0.8)	ACAT1 (0.7)	GREB1 (0.7)
REACTOME_P53:INDEPENDENT_G1S_DNA_DAMAGE_CHECKPOINT	REACTOME_P53:INDEPENDENT_G1S_DNA_DAMAGE_CHECKPOINT	0.14	0.900598	PSMD13 (6.0)	CDC42 (2.3)	MRPS31 (1.4)	MYNN (1.2)	BET1L (1.0)	CUL5 (0.9)	ENSG00000228397 (0.9)	WNT4 (0.8)	ACAT1 (0.7)	GREB1 (0.7)
REACTOME_P53:INDEPENDENT_DNA_DAMAGE_RESPONSE	REACTOME_P53:INDEPENDENT_DNA_DAMAGE_RESPONSE	0.14	0.900598	PSMD13 (6.0)	CDC42 (2.3)	MRPS31 (1.4)	MYNN (1.2)	BET1L (1.0)	CUL5 (0.9)	ENSG00000228397 (0.9)	WNT4 (0.8)	ACAT1 (0.7)	GREB1 (0.7)
GO:0004402	histone acetyltransferase activity	0.14	0.900598	TNRC6B (2.9)	OBFC1 (2.5)	COG6 (1.5)	ATM (1.5)	FOXO1 (1.5)	KDELC2 (1.4)	EXPH5 (1.4)	MYNN (1.4)	TERT (1.2)	RIC8A (1.2)
ENSG00000002822	MAD1L1 PPI subnetwork	0.14	0.900598	NPAT (1.4)	KDELC2 (1.3)	ATM (1.2)	LINC00339 (1.0)	COG6 (0.9)	ZNF346 (0.8)	SLC38A2 (0.8)	ACAT1 (0.7)	TNRC6B (0.6)	PSMD13 (0.6)
ENSG00000112186	CAP2 PPI subnetwork	0.14	0.900598	KANK1 (2.4)	RIC8A (1.9)	SLC38A1 (1.5)	PSMD13 (1.3)	CDC42 (1.3)	SLC25A15 (1.2)	SYNE1 (1.1)	ATM (1.0)	CDC42-IT1 (0.9)	ACAT1 (0.8)
GO:0006289	nucleotide-excision repair	0.14	0.900598	OBFC1 (3.7)	TERT (3.5)	ZNF346 (2.3)	MRPS31 (2.3)	ATM (2.0)	LINC00339 (1.9)	RIC8A (1.7)	NPAT (1.7)	MYNN (1.5)	ENSG00000228397 (1.3)
ENSG00000185787	MORF4L1 PPI subnetwork	0.14	0.900598	FIP1L1 (2.1)	MRPS31 (1.7)	MYNN (1.6)	UIMC1 (1.5)	CDC42 (1.3)	PSMD13 (1.3)	ATM (1.1)	SLC38A2 (1.0)	TERT (0.9)	ENSG00000258096 (0.9)
ENSG00000104221	BRF2 PPI subnetwork	0.14	0.900598	MRPS31 (3.4)	COG6 (2.6)	PSMD13 (1.8)	RIC8A (1.8)	MYNN (1.7)	ATM (1.6)	BET1L (1.5)	SLC25A15 (1.3)	ACAT1 (1.1)	SLC38A2 (1.0)
GO:0035051	cardiac cell differentiation	0.14	0.900598	WT1-AS (3.6)	KANK1 (1.7)	SYNE1 (1.7)	ENSG00000258096 (1.7)	SULT1B1 (1.7)	TNRC6B (1.2)	ZNF346 (1.1)	ENSG00000184378 (1.0)	DMRT1 (0.8)	ENSG00000226403 (0.8)
ENSG00000111445	RFC5 PPI subnetwork	0.14	0.900598	NPAT (4.1)	OBFC1 (2.6)	MRPS31 (2.3)	ATM (2.3)	COG6 (1.6)	DMRT1 (1.3)	UIMC1 (0.8)	ENSG00000258096 (0.8)	TERT (0.8)	MYNN (0.8)
GO:0005792	microsome	0.14	0.900598	SULT1B1 (2.4)	SLC25A15 (2.4)	EXPH5 (1.9)	ODF3 (1.2)	SLC38A2 (1.1)	SCGB1C1 (1.0)	LRRC31 (0.9)	ACAT1 (0.9)	C11orf65 (0.6)	LNX1 (0.5)
GO:0032451	demethylase activity	0.14	0.900598	ODF3 (2.3)	SLC25A15 (2.3)	SH3PXD2A (2.1)	UIMC1 (1.6)	ENSG00000184378 (1.5)	FIP1L1 (1.5)	LRRC34 (1.3)	EXPH5 (1.2)	TNRC6B (1.1)	C11orf65 (1.0)
ENSG00000196331	HIST1H2BO PPI subnetwork	0.14	0.900598	SCGB1C1 (2.7)	CDC42 (2.4)	ENSG00000228397 (1.9)	KDELC2 (1.5)	FIP1L1 (1.3)	CUL5 (1.3)	CDC42-IT1 (1.2)	DMRT1 (1.1)	C11orf65 (1.1)	SLC38A2 (1.0)
GO:0050792	regulation of viral reproduction	0.14	0.900598	FIP1L1 (2.2)	CUL5 (1.8)	TNRC6B (1.6)	RIC8A (1.4)	MYNN (1.3)	PSMD13 (1.3)	ZNF346 (1.3)	UIMC1 (1.2)	DMRT1 (0.9)	TERT (0.9)
ENSG00000058600	POLR3E PPI subnetwork	0.14	0.900598	RIC8A (3.0)	BET1L (2.5)	NPAT (2.4)	DMRT1 (2.0)	ZNF346 (1.8)	MYNN (1.7)	ENSG00000226403 (1.6)	MRPS31 (1.5)	TERT (1.4)	PSMD13 (1.3)
ENSG00000163631	ALB PPI subnetwork	0.14	0.900598	SLC25A15 (1.8)	WNT4 (1.8)	CD44 (1.5)	SULT1B1 (1.2)	LNX1 (1.2)	SALL1 (1.2)	LRRC34 (1.1)	ODF3 (0.8)	ENSG00000184378 (0.7)	GREB1 (0.6)
GO:0001938	positive regulation of endothelial cell proliferation	0.14	0.900598	COG6 (1.8)	GREB1 (1.7)	SH3PXD2A (1.5)	SALL1 (1.4)	WNT4 (1.3)	ENSG00000184378 (1.0)	LRRC31 (0.8)	NPAT (0.8)	TERT (0.7)	KANK1 (0.7)
ENSG00000171735	CAMTA1 PPI subnetwork	0.14	0.900598	GREB1 (2.6)	SLC38A1 (2.0)	LNX1 (1.8)	SLC25A15 (1.8)	KANK1 (1.4)	ENSG00000258096 (1.4)	TNRC6B (1.3)	LRRC34 (1.0)	SLC38A2 (1.0)	SCGB1C1 (1.0)
GO:0016605	PML body	0.14	0.900598	MYNN (3.2)	NPAT (2.8)	FIP1L1 (2.2)	TNRC6B (1.9)	MRPS31 (1.9)	CUL5 (1.7)	LRRC34 (1.6)	FOXO1 (1.4)	TERT (1.4)	LINC00339 (1.1)
GO:0042588	zymogen granule	0.14	0.900598	SULT1B1 (4.2)	LINC00339 (2.0)	CD44 (1.8)	SLC38A1 (1.8)	ENSG00000184378 (1.5)	SLC25A15 (1.5)	BET1L (1.4)	CDC42 (1.4)	LRRC31 (1.1)	SLC38A2 (1.0)
GO:0060322	head development	0.14	0.900598	GREB1 (3.4)	EXPH5 (3.1)	SH3PXD2A (2.8)	WNT4 (2.8)	SALL1 (2.4)	OBFC1 (1.5)	FIP1L1 (1.5)	SLC38A2 (1.5)	DMRT1 (1.3)	TNRC6B (1.2)
MP:0000925	abnormal floor plate morphology	0.14	0.900598	ATM (2.4)	SH3PXD2A (2.3)	C11orf65 (2.3)	KDELC2 (1.7)	ODF3 (1.6)	MRPS31 (1.6)	WT1-AS (1.6)	LRRC34 (1.5)	SALL1 (1.2)	TNRC6B (1.1)
REACTOME_MRNA_SPLICING_:_MINOR_PATHWAY	REACTOME_MRNA_SPLICING_:_MINOR_PATHWAY	0.14	0.900598	PSMD13 (2.2)	ATM (2.0)	RIC8A (1.8)	MRPS31 (1.1)	DMRT1 (1.0)	FIP1L1 (1.0)	SYNE1 (0.9)	LINC00339 (0.7)	SCGB1C1 (0.6)	FOXO1 (0.6)
ENSG00000100150	DEPDC5 PPI subnetwork	0.14	0.900598	CUL5 (4.1)	FIP1L1 (3.0)	MRPS31 (2.9)	KDELC2 (2.3)	ACAT1 (2.3)	PSMD13 (2.1)	ATM (2.0)	RIC8A (1.6)	DMRT1 (1.4)	BET1L (1.4)
GO:0004879	ligand-activated sequence-specific DNA binding RNA polymerase II transcription factor activity	0.14	0.900598	GREB1 (3.9)	TNRC6B (2.4)	SIRT3 (2.2)	LRRC31 (2.2)	FOXO1 (2.0)	WT1-AS (1.6)	SH3PXD2A (1.2)	SLC25A15 (1.1)	ENSG00000184378 (1.1)	KANK1 (1.1)
ENSG00000178913	TAF7 PPI subnetwork	0.14	0.900598	TNRC6B (2.6)	DMRT1 (2.4)	COG6 (2.0)	UIMC1 (2.0)	LINC00339 (1.4)	SLC38A2 (1.3)	ATM (1.2)	MRPS31 (1.2)	FIP1L1 (1.1)	ENSG00000226403 (1.1)
ENSG00000182446	NPLOC4 PPI subnetwork	0.14	0.900598	PSMD13 (2.6)	SLC38A2 (2.2)	UIMC1 (2.0)	FIP1L1 (1.6)	MYNN (1.4)	HK3 (1.3)	ENSG00000184378 (1.3)	EXPH5 (1.0)	MRPS31 (0.9)	LRRC34 (0.8)
ENSG00000070759	TESK2 PPI subnetwork	0.14	0.900598	LRRC31 (2.5)	LNX1 (2.3)	COG6 (2.1)	ATM (1.9)	SYNE1 (1.8)	TNRC6B (1.5)	SLC38A2 (1.4)	MYNN (1.3)	ODF3 (1.2)	CUL5 (1.1)
MP:0002020	increased tumor incidence	0.14	0.900598	NPAT (2.7)	TERT (2.6)	KDELC2 (1.7)	CD44 (1.6)	LRRC31 (1.6)	ATM (1.4)	SALL1 (1.3)	CDC42-IT1 (0.8)	DMRT1 (0.8)	FIP1L1 (0.7)
ENSG00000174804	FZD4 PPI subnetwork	0.14	0.900598	WNT4 (5.3)	SH3PXD2A (2.6)	GREB1 (2.0)	C11orf65 (1.8)	ODF3 (1.7)	WT1-AS (1.5)	TERT (1.3)	ENSG00000228397 (1.2)	DMRT1 (1.2)	EXPH5 (1.0)
ENSG00000184678	HIST2H2BE PPI subnetwork	0.14	0.900598	TNRC6B (2.1)	ENSG00000228397 (1.8)	UIMC1 (1.7)	SCGB1C1 (1.7)	FIP1L1 (1.5)	CUL5 (1.4)	ATM (1.2)	DMRT1 (1.2)	CDC42 (1.1)	CDC42-IT1 (0.9)
REACTOME_GRB2SOS_PROVIDES_LINKAGE_TO_MAPK_SIGNALING_FOR_INTERGRINS	REACTOME_GRB2SOS_PROVIDES_LINKAGE_TO_MAPK_SIGNALING_FOR_INTERGRINS	0.14	0.900598	SYNE1 (1.8)	SCGB1C1 (1.5)	KANK1 (1.4)	COG6 (1.1)	C11orf65 (1.1)	ENSG00000258096 (1.0)	SH3PXD2A (1.0)	SLC25A15 (0.9)	ENSG00000226403 (0.8)	ENSG00000228397 (0.8)
ENSG00000157404	KIT PPI subnetwork	0.14	0.900598	LRRC34 (1.9)	HK3 (1.6)	LNX1 (1.5)	FIP1L1 (1.5)	OBFC1 (1.4)	ENSG00000226403 (1.3)	KANK1 (1.1)	TNRC6B (1.0)	SYNE1 (1.0)	WT1-AS (1.0)
ENSG00000187325	TAF9B PPI subnetwork	0.14	0.900598	MYNN (3.1)	UIMC1 (2.8)	RIC8A (2.3)	FIP1L1 (2.2)	CDC42-IT1 (2.2)	MRPS31 (1.8)	ENSG00000226403 (1.6)	SLC25A15 (1.4)	ENSG00000184378 (1.3)	ATM (1.3)
ENSG00000215760	ENSG00000215760 PPI subnetwork	0.14	0.900598	MYNN (3.1)	UIMC1 (2.8)	RIC8A (2.3)	FIP1L1 (2.2)	CDC42-IT1 (2.2)	MRPS31 (1.8)	ENSG00000226403 (1.6)	SLC25A15 (1.4)	ENSG00000184378 (1.3)	ATM (1.3)
KEGG_ALDOSTERONE_REGULATED_SODIUM_REABSORPTION	KEGG_ALDOSTERONE_REGULATED_SODIUM_REABSORPTION	0.14	0.900598	WNT4 (2.6)	EXPH5 (2.1)	FOXO1 (2.1)	GREB1 (1.9)	LRRC31 (1.8)	SLC38A2 (1.7)	SH3PXD2A (1.5)	CDC42-IT1 (1.3)	ODF3 (1.2)	SALL1 (1.2)
GO:0016810	hydrolase activity, acting on carbon-nitrogen (but not peptide) bonds	0.14	0.900598	HK3 (3.2)	SLC25A15 (1.8)	ACAT1 (1.8)	TERT (1.7)	ENSG00000226403 (1.5)	SULT1B1 (1.5)	SIRT3 (1.1)	DMRT1 (0.8)	PSMD13 (0.6)	SLC38A1 (0.5)
GO:0032269	negative regulation of cellular protein metabolic process	0.14	0.900598	PSMD13 (2.3)	CDC42 (2.1)	CDC42-IT1 (2.0)	KANK1 (1.7)	MRPS31 (1.4)	ENSG00000228397 (1.3)	BET1L (1.3)	ENSG00000184378 (1.1)	MYNN (1.0)	WT1-AS (1.0)
ENSG00000145907	G3BP1 PPI subnetwork	0.14	0.900598	CD44 (2.3)	LINC00339 (1.5)	FOXO1 (1.4)	CUL5 (1.1)	TNRC6B (1.1)	FIP1L1 (0.9)	ATM (0.8)	HK3 (0.8)	LRRC31 (0.8)	NPAT (0.7)
MP:0001577	anemia	0.14	0.900598	FOXO1 (2.6)	TNRC6B (2.1)	CD44 (1.9)	UIMC1 (1.3)	MRPS31 (1.0)	SH3PXD2A (0.8)	GREB1 (0.7)	NPAT (0.7)	C11orf65 (0.5)	SCGB1C1 (0.5)
GO:0055024	regulation of cardiac muscle tissue development	0.14	0.900598	ENSG00000228397 (3.0)	EXPH5 (2.2)	ENSG00000258096 (2.1)	KANK1 (1.7)	LINC00339 (1.3)	SULT1B1 (1.1)	GREB1 (1.0)	ODF3 (1.0)	WT1-AS (0.9)	SLC25A15 (0.8)
GO:0006000	fructose metabolic process	0.15	0.900598	TERT (2.2)	SIRT3 (2.0)	COG6 (1.6)	LNX1 (1.4)	SLC25A15 (1.4)	ENSG00000226403 (1.3)	C11orf65 (1.2)	OBFC1 (1.1)	RIC8A (1.1)	HK3 (1.0)
ENSG00000171608	PIK3CD PPI subnetwork	0.15	0.900598	HK3 (2.9)	LRRC31 (1.7)	GREB1 (1.6)	MYNN (1.5)	BET1L (1.3)	WNT4 (1.3)	SULT1B1 (1.3)	DMRT1 (1.2)	FOXO1 (1.2)	ENSG00000184378 (0.9)
ENSG00000165410	CFL2 PPI subnetwork	0.15	0.900598	EXPH5 (2.2)	SULT1B1 (2.0)	SLC38A2 (1.9)	SCGB1C1 (1.3)	KANK1 (1.3)	CDC42 (1.3)	RIC8A (1.2)	OBFC1 (1.1)	KDELC2 (1.1)	ENSG00000226403 (0.9)
GO:0007128	meiotic prophase I	0.15	0.900598	DMRT1 (4.5)	C11orf65 (3.2)	ZNF346 (2.4)	ENSG00000226403 (2.0)	UIMC1 (1.9)	COG6 (1.7)	FIP1L1 (1.2)	LRRC34 (1.1)	ATM (1.0)	NPAT (0.7)
GO:0030323	respiratory tube development	0.15	0.900598	ENSG00000226403 (2.6)	SH3PXD2A (2.2)	ENSG00000258096 (2.1)	EXPH5 (1.9)	WNT4 (1.8)	ENSG00000228397 (1.4)	KANK1 (1.2)	SALL1 (0.9)	TERT (0.9)	LRRC31 (0.8)
ENSG00000141026	MED9 PPI subnetwork	0.15	0.900598	BET1L (2.5)	CUL5 (2.4)	MRPS31 (2.3)	NPAT (2.3)	FIP1L1 (1.9)	ZNF346 (1.7)	MYNN (1.6)	UIMC1 (1.5)	RIC8A (1.5)	TNRC6B (1.0)
ENSG00000185057	ENSG00000185057 PPI subnetwork	0.15	0.900598	MRPS31 (2.0)	UIMC1 (1.9)	FIP1L1 (1.9)	TERT (1.7)	ATM (1.6)	CUL5 (1.5)	DMRT1 (1.3)	BET1L (1.2)	SLC25A15 (1.2)	CD44 (1.1)
KEGG_RETINOL_METABOLISM	KEGG_RETINOL_METABOLISM	0.15	0.900598	SULT1B1 (5.5)	SLC25A15 (3.2)	EXPH5 (3.1)	LRRC31 (2.2)	ODF3 (1.6)	TERT (1.6)	WNT4 (1.5)	SALL1 (1.3)	ACAT1 (0.7)	MRPS31 (0.6)
ENSG00000141551	CSNK1D PPI subnetwork	0.15	0.900598	TERT (1.8)	ATM (1.8)	FOXO1 (1.7)	FIP1L1 (1.6)	OBFC1 (1.5)	WNT4 (1.3)	SLC38A2 (1.1)	NPAT (1.1)	RIC8A (1.0)	SH3PXD2A (0.9)
GO:0071900	regulation of protein serine/threonine kinase activity	0.15	0.900598	KANK1 (2.2)	SLC38A2 (1.9)	LRRC31 (1.7)	ENSG00000184378 (1.6)	BET1L (1.4)	RIC8A (1.3)	ENSG00000226403 (1.1)	CD44 (1.1)	WT1-AS (1.0)	OBFC1 (0.9)
ENSG00000186895	FGF3 PPI subnetwork	0.15	0.900598	LNX1 (2.6)	WNT4 (2.2)	UIMC1 (1.8)	SH3PXD2A (1.7)	KDELC2 (1.5)	FIP1L1 (1.5)	LRRC31 (1.3)	ZNF346 (1.2)	WT1-AS (1.1)	TERT (1.0)
GO:0031593	polyubiquitin binding	0.15	0.900598	ZNF346 (3.7)	OBFC1 (1.8)	FIP1L1 (1.8)	MYNN (1.7)	CUL5 (1.7)	ENSG00000226403 (1.2)	CDC42-IT1 (1.2)	WNT4 (1.2)	C11orf65 (1.1)	PSMD13 (1.0)
MP:0001324	abnormal eye pigmentation	0.15	0.900598	ATM (2.4)	RIC8A (1.9)	SIRT3 (1.8)	OBFC1 (1.6)	LRRC34 (1.5)	WNT4 (1.3)	NPAT (1.3)	LINC00339 (1.1)	KANK1 (1.1)	ZNF346 (1.0)
ENSG00000163960	UBXN7 PPI subnetwork	0.15	0.900598	CUL5 (4.2)	LINC00339 (2.5)	MYNN (2.3)	UIMC1 (2.1)	KANK1 (1.9)	PSMD13 (1.7)	ZNF346 (1.7)	LNX1 (1.4)	FIP1L1 (1.4)	NPAT (1.3)
ENSG00000132692	BCAN PPI subnetwork	0.15	0.900598	SULT1B1 (1.9)	WNT4 (1.8)	SYNE1 (1.7)	LNX1 (1.6)	SH3PXD2A (1.5)	ODF3 (1.3)	ENSG00000228397 (1.2)	HK3 (1.0)	C11orf65 (1.0)	SIRT3 (1.0)
GO:0018205	peptidyl-lysine modification	0.15	0.900598	UIMC1 (2.2)	MYNN (2.0)	TERT (1.8)	CDC42-IT1 (1.6)	EXPH5 (1.5)	OBFC1 (1.4)	FIP1L1 (1.4)	SLC38A2 (1.4)	TNRC6B (1.4)	ATM (1.3)
ENSG00000172795	DCP2 PPI subnetwork	0.15	0.900598	ATM (1.8)	CUL5 (1.8)	PSMD13 (1.7)	TNRC6B (1.6)	MRPS31 (1.6)	FIP1L1 (1.5)	BET1L (1.3)	NPAT (1.3)	RIC8A (1.3)	CD44 (1.2)
ENSG00000185630	PBX1 PPI subnetwork	0.15	0.900598	WT1-AS (3.2)	SALL1 (2.4)	SLC38A1 (1.6)	TNRC6B (1.6)	TERT (1.1)	ENSG00000184378 (1.1)	SYNE1 (1.0)	EXPH5 (0.9)	UIMC1 (0.9)	KANK1 (0.8)
GO:0003156	regulation of organ formation	0.15	0.900598	WT1-AS (4.7)	SALL1 (3.0)	WNT4 (2.5)	ENSG00000184378 (2.2)	KANK1 (1.8)	LINC00339 (1.8)	LRRC31 (1.7)	GREB1 (1.6)	ENSG00000226403 (1.5)	ENSG00000228397 (1.3)
GO:0032393	MHC class I receptor activity	0.15	0.900598	DMRT1 (2.8)	SYNE1 (2.8)	C11orf65 (1.7)	GREB1 (1.4)	FIP1L1 (1.3)	FOXO1 (0.9)	CD44 (0.9)	SCGB1C1 (0.7)	OBFC1 (0.6)	NPAT (0.6)
GO:0007599	hemostasis	0.15	0.900598	SCGB1C1 (5.3)	C11orf65 (2.1)	SYNE1 (2.0)	LRRC34 (1.6)	HK3 (1.5)	SLC25A15 (1.2)	RIC8A (1.1)	KDELC2 (1.1)	CDC42-IT1 (1.0)	ENSG00000226403 (1.0)
ENSG00000114670	NEK11 PPI subnetwork	0.15	0.900598	COG6 (3.2)	TNRC6B (2.5)	SYNE1 (2.1)	LRRC31 (2.1)	ODF3 (1.9)	ATM (1.8)	CUL5 (1.7)	EXPH5 (1.5)	SLC38A2 (1.5)	NPAT (1.5)
MP:0005294	abnormal heart ventricle morphology	0.15	0.900598	KANK1 (2.1)	SLC38A1 (1.6)	SYNE1 (1.4)	ENSG00000228397 (1.3)	SLC38A2 (1.1)	WT1-AS (1.0)	ENSG00000226403 (0.8)	LNX1 (0.8)	SCGB1C1 (0.8)	GREB1 (0.7)
ENSG00000101096	NFATC2 PPI subnetwork	0.15	0.900598	CDC42 (3.9)	FOXO1 (3.0)	CDC42-IT1 (2.1)	CD44 (1.7)	UIMC1 (1.3)	LINC00339 (1.3)	SH3PXD2A (1.2)	TNRC6B (1.1)	RIC8A (0.9)	ENSG00000258096 (0.9)
GO:0032006	regulation of TOR signaling cascade	0.15	0.900598	SLC38A1 (4.3)	SLC38A2 (3.4)	TNRC6B (2.5)	MYNN (2.3)	ZNF346 (1.6)	CUL5 (1.5)	KANK1 (1.0)	COG6 (1.0)	ENSG00000184378 (1.0)	C11orf65 (0.9)
GO:0048864	stem cell development	0.15	0.900598	SALL1 (2.8)	LRRC34 (2.7)	TERT (1.4)	ENSG00000228397 (1.2)	TNRC6B (1.1)	DMRT1 (1.0)	EXPH5 (1.0)	ENSG00000226403 (0.9)	ODF3 (0.8)	WNT4 (0.8)
GO:0072332	signal transduction by p53 class mediator resulting in induction of apoptosis	0.15	0.900598	TNRC6B (2.3)	RIC8A (1.9)	DMRT1 (1.8)	LINC00339 (1.6)	LRRC34 (1.5)	NPAT (1.3)	SLC25A15 (1.1)	SIRT3 (1.1)	CDC42-IT1 (1.0)	ATM (1.0)
ENSG00000073111	MCM2 PPI subnetwork	0.15	0.900598	NPAT (4.3)	KDELC2 (2.2)	OBFC1 (1.8)	ATM (1.7)	ENSG00000228397 (1.6)	TERT (1.5)	MYNN (1.5)	SLC38A2 (1.2)	UIMC1 (1.2)	FIP1L1 (1.0)
ENSG00000110768	GTF2H1 PPI subnetwork	0.15	0.900598	RIC8A (3.1)	BET1L (2.7)	PSMD13 (2.6)	FIP1L1 (2.5)	UIMC1 (2.3)	MRPS31 (2.1)	ZNF346 (1.7)	NPAT (1.7)	TERT (1.6)	LINC00339 (1.4)
MP:0009009	absent estrous cycle	0.15	0.900598	GREB1 (3.9)	FOXO1 (2.5)	LNX1 (2.3)	WT1-AS (1.7)	SLC38A2 (1.3)	LRRC34 (1.3)	HK3 (1.3)	DMRT1 (1.3)	EXPH5 (1.2)	LRRC31 (1.0)
ENSG00000091129	NRCAM PPI subnetwork	0.15	0.900598	SYNE1 (2.1)	EXPH5 (1.8)	ENSG00000226403 (1.7)	ENSG00000258096 (1.5)	WT1-AS (1.4)	TERT (1.3)	SLC38A1 (1.3)	GREB1 (1.3)	OBFC1 (1.3)	CD44 (1.1)
ENSG00000130706	ADRM1 PPI subnetwork	0.15	0.900598	PSMD13 (4.2)	CDC42 (2.1)	CDC42-IT1 (2.0)	SCGB1C1 (1.7)	ENSG00000184378 (1.5)	MYNN (1.5)	MRPS31 (1.5)	KANK1 (1.2)	SH3PXD2A (1.0)	ENSG00000228397 (1.0)
ENSG00000135336	ORC3 PPI subnetwork	0.15	0.900598	NPAT (4.6)	KDELC2 (2.0)	OBFC1 (1.7)	ENSG00000228397 (1.0)	ZNF346 (1.0)	ATM (1.0)	SLC38A2 (0.9)	UIMC1 (0.8)	LINC00339 (0.8)	LRRC31 (0.6)
GO:0007091	mitotic metaphase/anaphase transition	0.15	0.900598	CUL5 (2.9)	COG6 (2.6)	ATM (2.3)	NPAT (2.1)	TERT (2.1)	MRPS31 (1.8)	FIP1L1 (1.3)	OBFC1 (1.1)	KDELC2 (1.1)	LRRC34 (1.0)
ENSG00000157344	ENSG00000157344 PPI subnetwork	0.15	0.900598	MRPS31 (4.0)	UIMC1 (3.6)	CDC42-IT1 (2.5)	CUL5 (2.1)	LINC00339 (2.0)	ENSG00000228397 (1.7)	C11orf65 (1.5)	SYNE1 (1.5)	MYNN (1.4)	LRRC31 (1.3)
ENSG00000197459	HIST1H2BH PPI subnetwork	0.15	0.900598	SCGB1C1 (2.5)	CDC42 (2.2)	SLC38A2 (1.4)	ENSG00000228397 (1.3)	DMRT1 (1.3)	FIP1L1 (1.2)	CUL5 (1.2)	CDC42-IT1 (1.2)	UIMC1 (1.1)	TNRC6B (1.1)
GO:0016577	histone demethylation	0.15	0.900598	COG6 (2.2)	CDC42-IT1 (2.1)	ENSG00000226403 (2.0)	UIMC1 (1.8)	ODF3 (1.6)	ENSG00000184378 (1.2)	DMRT1 (0.8)	SYNE1 (0.8)	SLC25A15 (0.8)	SH3PXD2A (0.7)
ENSG00000076242	MLH1 PPI subnetwork	0.15	0.900598	ATM (3.9)	OBFC1 (3.9)	NPAT (3.1)	KDELC2 (2.7)	TERT (2.4)	SCGB1C1 (1.7)	CUL5 (1.6)	EXPH5 (1.5)	MRPS31 (1.5)	LINC00339 (1.3)
ENSG00000121931	LRIF1 PPI subnetwork	0.15	0.900598	PSMD13 (2.6)	MRPS31 (1.8)	UIMC1 (1.5)	OBFC1 (1.3)	SULT1B1 (1.3)	SLC38A2 (1.3)	FIP1L1 (1.2)	MYNN (1.1)	RIC8A (1.1)	ZNF346 (1.1)
GO:0042733	embryonic digit morphogenesis	0.15	0.900598	LRRC34 (2.9)	SALL1 (2.8)	ENSG00000228397 (1.9)	SCGB1C1 (1.3)	OBFC1 (1.3)	WNT4 (1.3)	GREB1 (1.3)	KDELC2 (1.1)	SLC25A15 (1.0)	ODF3 (1.0)
ENSG00000103051	COG4 PPI subnetwork	0.15	0.900598	COG6 (4.3)	BET1L (3.2)	MRPS31 (1.8)	MYNN (1.6)	CUL5 (1.4)	ZNF346 (1.4)	UIMC1 (1.3)	LINC00339 (1.2)	FIP1L1 (1.1)	SLC25A15 (1.0)
GO:0030917	midbrain-hindbrain boundary development	0.15	0.900598	ENSG00000258096 (4.9)	C11orf65 (3.0)	ODF3 (2.6)	ENSG00000228397 (2.1)	TERT (1.6)	WNT4 (1.6)	ZNF346 (1.5)	SH3PXD2A (1.1)	ENSG00000226403 (1.1)	SCGB1C1 (1.0)
GO:0006284	base-excision repair	0.15	0.900598	TERT (3.3)	OBFC1 (1.8)	NPAT (1.7)	LRRC31 (1.6)	ENSG00000228397 (1.5)	MYNN (1.5)	KDELC2 (1.5)	ENSG00000226403 (1.2)	EXPH5 (1.1)	ATM (1.0)
KEGG_RIBOSOME	KEGG_RIBOSOME	0.15	0.900598	ENSG00000226403 (2.0)	SULT1B1 (1.8)	MYNN (1.6)	DMRT1 (1.1)	WT1-AS (1.0)	KDELC2 (0.9)	BET1L (0.9)	CDC42 (0.7)	LINC00339 (0.6)	ATM (0.6)
GO:0001783	B cell apoptotic process	0.15	0.900598	ENSG00000228397 (3.7)	ENSG00000258096 (3.2)	ZNF346 (1.4)	CUL5 (1.2)	MYNN (1.1)	CD44 (1.0)	SH3PXD2A (0.9)	LNX1 (0.9)	ENSG00000226403 (0.8)	ENSG00000184378 (0.6)
ENSG00000124571	XPO5 PPI subnetwork	0.15	0.900598	PSMD13 (4.5)	SLC38A2 (1.9)	MRPS31 (1.7)	ENSG00000184378 (1.6)	UIMC1 (1.5)	LINC00339 (1.2)	COG6 (1.2)	SULT1B1 (1.0)	ACAT1 (0.9)	ZNF346 (0.9)
GO:0000076	DNA replication checkpoint	0.15	0.900598	NPAT (3.3)	TERT (2.4)	OBFC1 (2.0)	ZNF346 (1.8)	UIMC1 (1.6)	ENSG00000258096 (1.4)	ENSG00000184378 (1.2)	ATM (1.1)	KDELC2 (1.0)	LRRC31 (1.0)
ENSG00000026508	CD44 PPI subnetwork	0.15	0.900598	CD44 (2.6)	EXPH5 (1.8)	FOXO1 (1.5)	RIC8A (1.3)	BET1L (1.2)	NPAT (1.1)	ENSG00000258096 (1.0)	ENSG00000226403 (1.0)	TERT (1.0)	C11orf65 (0.8)
ENSG00000161395	PGAP3 PPI subnetwork	0.15	0.900598	ZNF346 (1.4)	COG6 (1.4)	KDELC2 (1.4)	LRRC31 (1.3)	SLC38A2 (1.3)	ENSG00000226403 (1.0)	SLC38A1 (1.0)	SULT1B1 (1.0)	ATM (0.9)	MRPS31 (0.9)
GO:0016811	hydrolase activity, acting on carbon-nitrogen (but not peptide) bonds, in linear amides	0.15	0.900598	ACAT1 (2.9)	SIRT3 (2.6)	TERT (2.2)	HK3 (1.9)	LRRC34 (1.2)	SLC25A15 (1.1)	DMRT1 (1.1)	RIC8A (1.1)	SYNE1 (0.9)	ENSG00000226403 (0.9)
GO:0006109	regulation of carbohydrate metabolic process	0.15	0.900598	LINC00339 (2.5)	ZNF346 (2.0)	SIRT3 (2.0)	SLC25A15 (1.7)	LRRC31 (1.7)	TNRC6B (1.1)	OBFC1 (0.9)	COG6 (0.8)	MYNN (0.8)	SLC38A1 (0.8)
ENSG00000136286	MYO1G PPI subnetwork	0.15	0.900598	HK3 (2.1)	SLC38A1 (2.0)	KANK1 (1.8)	CDC42-IT1 (1.7)	SYNE1 (1.7)	CD44 (1.7)	SLC38A2 (1.6)	FOXO1 (1.6)	SULT1B1 (1.5)	ATM (1.1)
MP:0002410	decreased susceptibility to viral infection	0.15	0.900598	HK3 (4.1)	SH3PXD2A (2.1)	SULT1B1 (1.9)	ENSG00000226403 (1.3)	LRRC31 (1.0)	SYNE1 (1.0)	TERT (0.9)	CD44 (0.9)	UIMC1 (0.9)	ODF3 (0.9)
GO:0006475	internal protein amino acid acetylation	0.15	0.900598	MYNN (2.2)	CDC42-IT1 (2.0)	TERT (1.9)	UIMC1 (1.8)	OBFC1 (1.8)	LINC00339 (1.5)	EXPH5 (1.3)	TNRC6B (1.3)	FIP1L1 (1.2)	KDELC2 (1.0)
ENSG00000121542	SEC22A PPI subnetwork	0.15	0.900598	COG6 (5.4)	BET1L (4.9)	MYNN (2.5)	PSMD13 (2.2)	RIC8A (1.6)	ACAT1 (1.6)	CDC42 (1.3)	CUL5 (1.2)	UIMC1 (1.2)	ATM (1.1)
ENSG00000168496	FEN1 PPI subnetwork	0.15	0.900598	NPAT (3.8)	OBFC1 (2.6)	TERT (2.6)	ATM (1.9)	KDELC2 (1.3)	LINC00339 (1.3)	CDC42-IT1 (1.0)	ZNF346 (0.9)	UIMC1 (0.8)	ENSG00000228397 (0.7)
MP:0006397	disorganized long bone epiphyseal plate	0.15	0.900598	FOXO1 (2.8)	SH3PXD2A (2.4)	COG6 (1.7)	LNX1 (1.6)	KANK1 (1.5)	GREB1 (1.4)	HK3 (1.1)	CD44 (0.8)	BET1L (0.8)	SCGB1C1 (0.7)
ENSG00000136504	KAT7 PPI subnetwork	0.15	0.900598	MYNN (3.4)	ENSG00000184378 (2.7)	LINC00339 (1.8)	ZNF346 (1.4)	COG6 (1.3)	UIMC1 (1.2)	TERT (0.9)	OBFC1 (0.8)	CDC42-IT1 (0.7)	SALL1 (0.6)
MP:0003058	increased insulin secretion	0.15	0.900598	GREB1 (4.2)	WT1-AS (1.9)	KANK1 (1.6)	FOXO1 (1.5)	ENSG00000258096 (1.4)	LNX1 (1.3)	BET1L (0.9)	SLC25A15 (0.9)	TNRC6B (0.9)	ACAT1 (0.7)
ENSG00000174307	PHLDA3 PPI subnetwork	0.15	0.900598	MRPS31 (2.9)	ATM (2.5)	COG6 (2.5)	ACAT1 (2.5)	CUL5 (2.0)	PSMD13 (1.1)	LINC00339 (1.0)	KDELC2 (1.0)	SLC25A15 (0.9)	ENSG00000226403 (0.9)
GO:0005031	tumor necrosis factor-activated receptor activity	0.15	0.900598	CD44 (1.7)	SULT1B1 (1.5)	WNT4 (1.2)	WT1-AS (1.0)	ENSG00000258096 (0.9)	SCGB1C1 (0.9)	EXPH5 (0.8)	KANK1 (0.8)	LNX1 (0.8)	GREB1 (0.7)
GO:0007059	chromosome segregation	0.15	0.900598	ZNF346 (2.7)	NPAT (2.5)	COG6 (2.2)	ATM (2.0)	KDELC2 (1.6)	ENSG00000226403 (1.5)	ENSG00000258096 (1.4)	UIMC1 (1.3)	CUL5 (1.3)	LINC00339 (1.1)
ENSG00000082074	FYB PPI subnetwork	0.15	0.900598	SLC38A1 (3.4)	HK3 (2.7)	LRRC31 (2.1)	C11orf65 (1.9)	COG6 (1.4)	RIC8A (1.3)	ATM (1.1)	SYNE1 (0.9)	TNRC6B (0.9)	SCGB1C1 (0.8)
ENSG00000162928	PEX13 PPI subnetwork	0.15	0.900598	SIRT3 (3.3)	LINC00339 (3.1)	COG6 (2.8)	MRPS31 (2.0)	ENSG00000228397 (1.6)	ACAT1 (1.5)	C11orf65 (1.0)	UIMC1 (1.0)	CUL5 (0.9)	MYNN (0.8)
GO:0048048	embryonic eye morphogenesis	0.15	0.900598	ODF3 (2.7)	SALL1 (2.5)	ENSG00000184378 (2.5)	SH3PXD2A (2.1)	SLC38A1 (1.6)	WT1-AS (1.6)	LRRC34 (1.4)	WNT4 (1.4)	EXPH5 (1.4)	ENSG00000226403 (1.1)
REACTOME_DUAL_INCISION_REACTION_IN_GG:NER	REACTOME_DUAL_INCISION_REACTION_IN_GG:NER	0.15	0.900598	OBFC1 (3.1)	RIC8A (2.9)	MRPS31 (2.8)	ZNF346 (2.3)	LINC00339 (2.2)	SIRT3 (2.1)	UIMC1 (1.9)	NPAT (1.4)	PSMD13 (1.4)	BET1L (1.3)
REACTOME_FORMATION_OF_INCISION_COMPLEX_IN_GG:NER	REACTOME_FORMATION_OF_INCISION_COMPLEX_IN_GG:NER	0.15	0.900598	OBFC1 (3.1)	RIC8A (2.9)	MRPS31 (2.8)	ZNF346 (2.3)	LINC00339 (2.2)	SIRT3 (2.1)	UIMC1 (1.9)	NPAT (1.4)	PSMD13 (1.4)	BET1L (1.3)
GO:0000981	sequence-specific DNA binding RNA polymerase II transcription factor activity	0.15	0.900598	SALL1 (3.0)	TNRC6B (2.2)	WT1-AS (2.2)	LRRC31 (1.9)	GREB1 (1.9)	WNT4 (1.7)	FOXO1 (1.6)	SH3PXD2A (1.4)	KANK1 (1.3)	SLC25A15 (1.2)
GO:0003899	DNA-directed RNA polymerase activity	0.15	0.900598	BET1L (2.6)	RIC8A (2.0)	KANK1 (1.9)	SLC25A15 (1.4)	ENSG00000226403 (1.4)	SCGB1C1 (1.4)	ZNF346 (1.4)	ATM (1.2)	MYNN (1.1)	NPAT (1.0)
GO:0034062	RNA polymerase activity	0.15	0.900598	BET1L (2.6)	RIC8A (2.0)	KANK1 (1.9)	SLC25A15 (1.4)	ENSG00000226403 (1.4)	SCGB1C1 (1.4)	ZNF346 (1.4)	ATM (1.2)	MYNN (1.1)	NPAT (1.0)
REACTOME_RNA_POLYMERASE_III_TRANSCRIPTION_INITIATION_FROM_TYPE_3_PROMOTER	REACTOME_RNA_POLYMERASE_III_TRANSCRIPTION_INITIATION_FROM_TYPE_3_PROMOTER	0.15	0.900598	BET1L (2.1)	NPAT (2.1)	ZNF346 (2.0)	RIC8A (1.8)	MYNN (1.8)	KANK1 (1.5)	MRPS31 (1.4)	DMRT1 (1.3)	TERT (1.2)	ENSG00000184378 (1.0)
ENSG00000066933	MYO9A PPI subnetwork	0.15	0.900598	OBFC1 (2.7)	ACAT1 (2.3)	COG6 (2.2)	CDC42-IT1 (1.2)	SCGB1C1 (1.2)	PSMD13 (1.1)	SIRT3 (1.1)	MRPS31 (1.0)	SLC38A1 (0.9)	MYNN (0.9)
GO:0004602	glutathione peroxidase activity	0.15	0.900598	BET1L (2.0)	OBFC1 (1.9)	EXPH5 (1.9)	C11orf65 (1.6)	KDELC2 (1.6)	GREB1 (1.4)	ACAT1 (1.4)	LINC00339 (1.2)	SH3PXD2A (1.1)	ENSG00000226403 (1.0)
GO:0030178	negative regulation of Wnt receptor signaling pathway	0.15	0.900598	SH3PXD2A (2.7)	WNT4 (2.0)	EXPH5 (1.7)	SALL1 (1.5)	LINC00339 (1.5)	TNRC6B (1.5)	KANK1 (1.3)	SLC38A2 (1.2)	GREB1 (0.9)	ENSG00000228397 (0.9)
GO:0060541	respiratory system development	0.15	0.900598	SH3PXD2A (3.2)	EXPH5 (2.3)	WNT4 (2.2)	ENSG00000258096 (1.8)	ENSG00000226403 (1.7)	WT1-AS (1.5)	SALL1 (1.5)	FOXO1 (1.2)	KANK1 (1.1)	SLC38A1 (0.8)
ENSG00000071127	WDR1 PPI subnetwork	0.15	0.900598	SULT1B1 (2.3)	CDC42 (2.3)	SYNE1 (1.8)	ENSG00000258096 (1.5)	RIC8A (1.4)	SCGB1C1 (1.4)	PSMD13 (1.4)	SLC38A2 (1.0)	TERT (0.8)	LRRC31 (0.7)
ENSG00000137767	SQRDL PPI subnetwork	0.15	0.900598	SLC38A1 (2.3)	KDELC2 (2.0)	GREB1 (1.4)	SLC38A2 (1.4)	ENSG00000184378 (1.3)	SULT1B1 (1.3)	CD44 (1.2)	LRRC34 (1.2)	EXPH5 (1.1)	MYNN (1.0)
ENSG00000187778	MCRS1 PPI subnetwork	0.15	0.900598	MRPS31 (2.8)	UIMC1 (2.3)	FIP1L1 (1.7)	DMRT1 (1.6)	ATM (1.2)	LINC00339 (0.8)	PSMD13 (0.7)	COG6 (0.7)	WT1-AS (0.7)	LNX1 (0.6)
ENSG00000136931	NR5A1 PPI subnetwork	0.15	0.900598	TNRC6B (2.8)	FOXO1 (2.4)	LNX1 (2.3)	TERT (2.0)	UIMC1 (1.9)	LRRC31 (1.7)	DMRT1 (1.7)	SALL1 (1.6)	FIP1L1 (1.5)	MRPS31 (0.9)
GO:0034130	toll-like receptor 1 signaling pathway	0.15	0.900598	CDC42-IT1 (5.1)	SULT1B1 (1.8)	LRRC31 (1.6)	CD44 (1.4)	OBFC1 (1.2)	BET1L (0.9)	LNX1 (0.8)	SIRT3 (0.7)	SH3PXD2A (0.7)	LINC00339 (0.6)
GO:0034134	toll-like receptor 2 signaling pathway	0.15	0.900598	CDC42-IT1 (4.8)	SULT1B1 (1.8)	LRRC31 (1.6)	CD44 (1.4)	OBFC1 (1.1)	SH3PXD2A (0.8)	LNX1 (0.8)	BET1L (0.8)	SIRT3 (0.7)	COG6 (0.7)
GO:0008154	actin polymerization or depolymerization	0.15	0.900598	CDC42 (1.8)	OBFC1 (1.7)	CDC42-IT1 (1.6)	LNX1 (1.3)	ENSG00000258096 (1.2)	SH3PXD2A (1.2)	DMRT1 (1.1)	SYNE1 (1.1)	TNRC6B (0.9)	CUL5 (0.9)
ENSG00000205659	LIN52 PPI subnetwork	0.15	0.900598	NPAT (3.3)	ATM (1.8)	ZNF346 (1.6)	LINC00339 (1.3)	SYNE1 (1.1)	MYNN (1.1)	MRPS31 (0.9)	LRRC31 (0.9)	UIMC1 (0.7)	DMRT1 (0.6)
ENSG00000125952	MAX PPI subnetwork	0.15	0.900598	TERT (2.9)	SLC38A2 (2.1)	DMRT1 (1.6)	SULT1B1 (1.6)	OBFC1 (1.3)	CDC42-IT1 (1.3)	SH3PXD2A (1.3)	CUL5 (1.2)	UIMC1 (1.0)	COG6 (1.0)
GO:0016579	protein deubiquitination	0.15	0.900598	CUL5 (2.8)	ZNF346 (2.4)	ENSG00000226403 (1.8)	RIC8A (1.8)	C11orf65 (1.5)	ATM (1.4)	NPAT (1.3)	MYNN (1.1)	LNX1 (1.0)	UIMC1 (1.0)
ENSG00000112357	PEX7 PPI subnetwork	0.15	0.900598	ACAT1 (3.3)	PSMD13 (2.1)	MRPS31 (2.0)	SIRT3 (1.8)	ENSG00000228397 (1.5)	ZNF346 (1.5)	COG6 (1.3)	FIP1L1 (1.2)	LINC00339 (1.0)	LNX1 (0.9)
MP:0001260	increased body weight	0.15	0.900598	FOXO1 (3.3)	KANK1 (1.9)	WNT4 (1.8)	GREB1 (1.6)	ENSG00000226403 (1.4)	SULT1B1 (1.1)	ACAT1 (1.1)	ATM (1.1)	SLC38A2 (0.8)	LINC00339 (0.8)
ENSG00000153922	CHD1 PPI subnetwork	0.15	0.900598	FIP1L1 (3.4)	UIMC1 (3.1)	SYNE1 (2.0)	OBFC1 (1.6)	RIC8A (1.4)	NPAT (1.4)	MRPS31 (1.3)	TNRC6B (1.3)	CUL5 (1.0)	LINC00339 (1.0)
ENSG00000136152	COG3 PPI subnetwork	0.15	0.900598	COG6 (5.8)	BET1L (4.6)	MYNN (3.5)	MRPS31 (2.6)	LINC00339 (2.1)	FIP1L1 (1.7)	ZNF346 (1.5)	LRRC31 (1.4)	UIMC1 (1.4)	CUL5 (1.3)
ENSG00000197299	BLM PPI subnetwork	0.15	0.900598	NPAT (5.1)	ATM (2.9)	KDELC2 (2.5)	OBFC1 (2.4)	TERT (2.0)	ZNF346 (1.6)	FIP1L1 (1.4)	CDC42-IT1 (1.3)	UIMC1 (1.3)	CUL5 (1.2)
GO:0019902	phosphatase binding	0.15	0.900598	LNX1 (1.4)	CUL5 (1.4)	LINC00339 (1.3)	KANK1 (0.9)	WT1-AS (0.8)	COG6 (0.7)	ZNF346 (0.7)	NPAT (0.6)	EXPH5 (0.5)	WNT4 (0.5)
GO:0042274	ribosomal small subunit biogenesis	0.15	0.900598	ENSG00000226403 (3.8)	DMRT1 (2.3)	ZNF346 (2.2)	LRRC34 (2.0)	LINC00339 (1.7)	UIMC1 (1.6)	SULT1B1 (1.4)	WT1-AS (1.3)	KDELC2 (1.0)	TERT (0.8)
ENSG00000125977	EIF2S2 PPI subnetwork	0.15	0.900598	PSMD13 (1.5)	LRRC34 (1.3)	RIC8A (1.2)	ENSG00000228397 (1.2)	MYNN (1.1)	LRRC31 (1.0)	ACAT1 (1.0)	SLC38A2 (0.9)	KANK1 (0.9)	ATM (0.9)
REACTOME_METABOLISM_OF_MRNA	REACTOME_METABOLISM_OF_MRNA	0.15	0.900598	PSMD13 (3.6)	CDC42 (3.0)	MYNN (2.3)	UIMC1 (2.1)	MRPS31 (1.9)	CDC42-IT1 (1.3)	FOXO1 (1.0)	WNT4 (0.8)	CUL5 (0.8)	ENSG00000228397 (0.8)
ENSG00000136936	XPA PPI subnetwork	0.15	0.900598	NPAT (3.4)	OBFC1 (2.4)	RIC8A (2.0)	LINC00339 (1.8)	FIP1L1 (1.8)	DMRT1 (1.6)	KDELC2 (1.6)	MRPS31 (1.6)	UIMC1 (1.6)	PSMD13 (1.5)
GO:0055092	sterol homeostasis	0.15	0.900598	SLC25A15 (2.9)	CDC42-IT1 (2.1)	LNX1 (1.5)	SULT1B1 (1.0)	ZNF346 (0.9)	ENSG00000226403 (0.9)	SIRT3 (0.9)	ENSG00000228397 (0.8)	UIMC1 (0.8)	TERT (0.6)
GO:0042632	cholesterol homeostasis	0.15	0.900598	SLC25A15 (2.9)	CDC42-IT1 (2.1)	LNX1 (1.5)	SULT1B1 (1.0)	ZNF346 (0.9)	ENSG00000226403 (0.9)	SIRT3 (0.9)	ENSG00000228397 (0.8)	UIMC1 (0.8)	TERT (0.6)
ENSG00000107623	GDF10 PPI subnetwork	0.15	0.900598	LRRC34 (2.2)	C11orf65 (2.0)	EXPH5 (1.7)	SLC25A15 (1.6)	SIRT3 (1.5)	SCGB1C1 (1.4)	WNT4 (1.1)	ENSG00000228397 (1.1)	ENSG00000258096 (0.8)	COG6 (0.8)
KEGG_DRUG_METABOLISM_OTHER_ENZYMES	KEGG_DRUG_METABOLISM_OTHER_ENZYMES	0.15	0.900598	SULT1B1 (6.4)	SLC25A15 (3.6)	LRRC31 (2.7)	HK3 (1.6)	ACAT1 (1.4)	LINC00339 (1.4)	LNX1 (1.3)	OBFC1 (0.9)	SIRT3 (0.7)	ZNF346 (0.6)
ENSG00000008988	RPS20 PPI subnetwork	0.15	0.900598	CDC42 (2.0)	CUL5 (1.2)	SLC38A1 (1.2)	CD44 (1.0)	SLC38A2 (1.0)	ENSG00000228397 (1.0)	PSMD13 (1.0)	SULT1B1 (0.9)	CDC42-IT1 (0.8)	DMRT1 (0.7)
GO:0001510	RNA methylation	0.15	0.900598	CUL5 (2.2)	RIC8A (2.0)	ENSG00000228397 (1.9)	MRPS31 (1.7)	TERT (1.7)	LINC00339 (1.5)	SIRT3 (1.2)	CDC42-IT1 (1.2)	OBFC1 (1.1)	LRRC31 (1.1)
GO:0006399	tRNA metabolic process	0.15	0.900598	MRPS31 (2.4)	SLC38A1 (1.9)	RIC8A (1.9)	SIRT3 (1.7)	ATM (1.5)	TERT (1.4)	LINC00339 (1.3)	SLC25A15 (1.0)	OBFC1 (1.0)	UIMC1 (1.0)
ENSG00000087263	OGFOD1 PPI subnetwork	0.15	0.900598	KDELC2 (2.4)	RIC8A (2.4)	LINC00339 (2.0)	UIMC1 (1.9)	SLC25A15 (1.5)	EXPH5 (1.4)	COG6 (1.4)	LRRC34 (0.9)	TERT (0.9)	PSMD13 (0.9)
ENSG00000159692	CTBP1 PPI subnetwork	0.15	0.900598	UIMC1 (3.3)	TNRC6B (3.1)	NPAT (2.7)	FOXO1 (1.9)	ATM (1.5)	SH3PXD2A (1.5)	TERT (1.5)	ENSG00000228397 (1.0)	SYNE1 (0.9)	FIP1L1 (0.9)
GO:0005777	peroxisome	0.15	0.900598	ACAT1 (4.4)	SIRT3 (3.9)	SULT1B1 (2.4)	SLC25A15 (1.7)	LRRC34 (1.5)	LRRC31 (1.3)	MRPS31 (1.2)	OBFC1 (1.1)	COG6 (1.0)	PSMD13 (1.0)
GO:0042579	microbody	0.15	0.900598	ACAT1 (4.4)	SIRT3 (3.9)	SULT1B1 (2.4)	SLC25A15 (1.7)	LRRC34 (1.5)	LRRC31 (1.3)	MRPS31 (1.2)	OBFC1 (1.1)	COG6 (1.0)	PSMD13 (1.0)
ENSG00000121879	PIK3CA PPI subnetwork	0.15	0.900598	HK3 (3.3)	GREB1 (2.1)	SYNE1 (2.1)	RIC8A (1.3)	LRRC31 (1.3)	KANK1 (1.2)	FOXO1 (0.9)	CDC42 (0.7)	TNRC6B (0.7)	BET1L (0.7)
MP:0003850	abnormal thymocyte activation	0.15	0.900598	SLC38A1 (2.9)	HK3 (1.7)	CD44 (1.1)	LRRC34 (1.0)	ENSG00000228397 (0.8)	WT1-AS (0.6)	C11orf65 (0.6)	NPAT (0.6)	TNRC6B (0.5)	RIC8A (0.5)
GO:0015718	monocarboxylic acid transport	0.15	0.900598	SLC25A15 (2.0)	ODF3 (1.9)	TERT (1.8)	ENSG00000226403 (1.7)	SULT1B1 (1.3)	SIRT3 (1.3)	ACAT1 (1.3)	ENSG00000184378 (1.2)	SLC38A1 (1.1)	LINC00339 (1.1)
ENSG00000088926	F11 PPI subnetwork	0.15	0.900598	SCGB1C1 (3.7)	LNX1 (1.4)	SIRT3 (1.4)	SLC25A15 (1.4)	GREB1 (1.4)	C11orf65 (1.3)	SALL1 (0.9)	ENSG00000184378 (0.8)	SULT1B1 (0.8)	DMRT1 (0.7)
ENSG00000120616	EPC1 PPI subnetwork	0.15	0.900598	MYNN (2.0)	FIP1L1 (1.7)	GREB1 (1.7)	UIMC1 (1.6)	LINC00339 (1.4)	MRPS31 (1.2)	ODF3 (1.2)	TERT (1.0)	SLC38A2 (0.9)	HK3 (0.8)
GO:0008063	Toll signaling pathway	0.15	0.900598	CDC42-IT1 (4.3)	SULT1B1 (1.7)	BET1L (1.2)	CD44 (1.2)	LRRC31 (1.1)	HK3 (1.0)	SIRT3 (0.9)	RIC8A (0.9)	SLC38A2 (0.9)	OBFC1 (0.8)
MP:0001922	reduced male fertility	0.15	0.900598	KANK1 (3.7)	DMRT1 (3.0)	SALL1 (2.5)	GREB1 (2.5)	ENSG00000184378 (2.5)	ODF3 (1.7)	LRRC34 (1.5)	LNX1 (1.4)	ENSG00000226403 (1.3)	FOXO1 (1.1)
GO:0007596	blood coagulation	0.15	0.900598	SCGB1C1 (5.4)	C11orf65 (2.1)	SYNE1 (2.0)	LRRC34 (1.6)	HK3 (1.5)	SLC25A15 (1.3)	RIC8A (1.1)	KDELC2 (1.1)	ENSG00000226403 (1.0)	CD44 (1.0)
GO:0034470	ncRNA processing	0.15	0.900598	MRPS31 (2.6)	TERT (2.0)	LINC00339 (1.6)	FIP1L1 (1.5)	ENSG00000226403 (1.4)	NPAT (1.4)	RIC8A (1.4)	SLC25A15 (1.4)	UIMC1 (1.3)	MYNN (1.1)
GO:0021536	diencephalon development	0.15	0.900598	ENSG00000258096 (2.3)	GREB1 (2.1)	ENSG00000228397 (2.0)	ODF3 (1.9)	SALL1 (1.6)	SLC38A1 (1.5)	WNT4 (1.0)	LNX1 (1.0)	ATM (0.9)	SULT1B1 (0.9)
ENSG00000128908	INO80 PPI subnetwork	0.15	0.900598	SCGB1C1 (2.8)	TNRC6B (2.0)	C11orf65 (1.6)	FIP1L1 (1.5)	ENSG00000228397 (1.5)	ENSG00000258096 (1.3)	CUL5 (1.2)	EXPH5 (1.1)	CDC42-IT1 (1.1)	ATM (1.1)
MP:0004777	abnormal phospholipid level	0.15	0.900598	LNX1 (2.0)	SLC25A15 (2.0)	KANK1 (1.5)	ACAT1 (1.4)	MRPS31 (1.2)	ENSG00000258096 (1.0)	LRRC34 (0.9)	FOXO1 (0.9)	SCGB1C1 (0.8)	SALL1 (0.8)
GO:0009953	dorsal/ventral pattern formation	0.15	0.900598	SALL1 (2.5)	ENSG00000226403 (1.9)	LRRC34 (1.6)	EXPH5 (1.6)	C11orf65 (1.5)	KANK1 (1.4)	WNT4 (1.3)	LRRC31 (1.2)	GREB1 (1.1)	SH3PXD2A (1.1)
ENSG00000140009	ESR2 PPI subnetwork	0.15	0.900598	FOXO1 (3.7)	TNRC6B (3.3)	COG6 (2.8)	TERT (2.8)	CDC42 (1.3)	SLC38A1 (1.3)	SLC38A2 (1.2)	SCGB1C1 (1.1)	WNT4 (1.1)	MRPS31 (1.1)
MP:0009788	increased susceptibility to bacterial infection induced morbidity/mortality	0.15	0.900598	HK3 (3.3)	CD44 (1.8)	ENSG00000184378 (1.3)	SLC38A2 (1.0)	ACAT1 (0.9)	LNX1 (0.8)	TERT (0.8)	UIMC1 (0.8)	LRRC34 (0.6)	WNT4 (0.6)
GO:0016607	nuclear speck	0.15	0.900598	FIP1L1 (3.7)	UIMC1 (3.2)	CUL5 (1.9)	TNRC6B (1.7)	NPAT (1.7)	MYNN (1.4)	WT1-AS (1.4)	FOXO1 (1.2)	SLC38A2 (1.2)	MRPS31 (1.2)
GO:0030259	lipid glycosylation	0.15	0.900598	SULT1B1 (4.2)	LRRC31 (3.2)	ENSG00000226403 (3.0)	CDC42-IT1 (2.2)	SLC38A1 (2.0)	ENSG00000258096 (1.8)	EXPH5 (1.6)	SLC38A2 (1.3)	LINC00339 (1.3)	ODF3 (1.2)
ENSG00000067191	CACNB1 PPI subnetwork	0.15	0.900598	SYNE1 (2.4)	ENSG00000228397 (2.3)	SCGB1C1 (2.1)	TERT (1.8)	SLC38A2 (1.6)	ACAT1 (1.5)	CDC42-IT1 (1.5)	RIC8A (1.4)	OBFC1 (1.4)	CD44 (1.2)
ENSG00000138346	DNA2 PPI subnetwork	0.15	0.900598	NPAT (3.8)	ATM (3.0)	KDELC2 (2.3)	OBFC1 (2.1)	TERT (1.8)	LINC00339 (1.4)	UIMC1 (1.0)	MRPS31 (1.0)	ENSG00000228397 (0.9)	SLC38A2 (0.8)
ENSG00000115718	PROC PPI subnetwork	0.15	0.900598	SCGB1C1 (3.4)	LNX1 (1.7)	DMRT1 (1.7)	CD44 (1.3)	TERT (1.1)	ODF3 (1.1)	ENSG00000258096 (1.0)	OBFC1 (1.0)	SLC38A2 (1.0)	KDELC2 (0.9)
ENSG00000158623	COPG2 PPI subnetwork	0.15	0.900598	COG6 (4.3)	BET1L (3.4)	ACAT1 (3.3)	PSMD13 (2.4)	SIRT3 (2.4)	RIC8A (2.0)	MYNN (1.8)	LRRC31 (1.7)	CDC42-IT1 (1.0)	LINC00339 (1.0)
ENSG00000214133	ENSG00000214133 PPI subnetwork	0.15	0.900598	COG6 (4.3)	BET1L (3.4)	ACAT1 (3.3)	PSMD13 (2.4)	SIRT3 (2.4)	RIC8A (2.0)	MYNN (1.8)	LRRC31 (1.7)	CDC42-IT1 (1.0)	LINC00339 (1.0)
GO:0048384	retinoic acid receptor signaling pathway	0.15	0.900598	ENSG00000226403 (2.7)	LRRC34 (1.8)	ENSG00000184378 (1.8)	ODF3 (1.6)	MYNN (1.6)	SH3PXD2A (1.5)	TNRC6B (1.2)	DMRT1 (1.0)	ENSG00000258096 (1.0)	EXPH5 (1.0)
ENSG00000123975	CKS2 PPI subnetwork	0.15	0.900598	KANK1 (2.2)	ENSG00000184378 (2.2)	CDC42-IT1 (2.2)	CUL5 (2.2)	SLC38A2 (1.9)	FIP1L1 (1.7)	ZNF346 (1.6)	UIMC1 (1.4)	MRPS31 (1.4)	CDC42 (1.1)
ENSG00000012983	MAP4K5 PPI subnetwork	0.15	0.900598	TNRC6B (2.1)	COG6 (2.0)	LRRC31 (1.9)	ATM (1.7)	EXPH5 (1.7)	NPAT (1.7)	KANK1 (1.6)	ODF3 (1.6)	LRRC34 (1.5)	SIRT3 (1.4)
ENSG00000160551	TAOK1 PPI subnetwork	0.15	0.900598	COG6 (2.0)	NPAT (1.8)	SLC38A2 (1.5)	ATM (1.4)	KDELC2 (1.2)	TNRC6B (1.0)	SIRT3 (0.9)	KANK1 (0.8)	LRRC31 (0.7)	ACAT1 (0.7)
REACTOME_SYNTHESIS_OF_DNA	REACTOME_SYNTHESIS_OF_DNA	0.15	0.900598	PSMD13 (4.1)	NPAT (2.3)	MRPS31 (2.0)	CDC42 (1.4)	ENSG00000228397 (1.3)	MYNN (1.2)	OBFC1 (1.1)	ZNF346 (1.0)	ENSG00000258096 (1.0)	KDELC2 (0.8)
ENSG00000147869	CER1 PPI subnetwork	0.15	0.900598	WNT4 (6.8)	C11orf65 (1.6)	GREB1 (1.5)	ENSG00000228397 (1.4)	DMRT1 (1.0)	WT1-AS (1.0)	ENSG00000184378 (1.0)	ODF3 (1.0)	SALL1 (0.9)	SH3PXD2A (0.9)
ENSG00000063244	U2AF2 PPI subnetwork	0.15	0.900598	UIMC1 (2.5)	FIP1L1 (2.4)	PSMD13 (1.9)	CUL5 (1.5)	CDC42 (1.3)	DMRT1 (1.2)	LINC00339 (1.1)	CDC42-IT1 (1.0)	SALL1 (1.0)	ATM (0.9)
ENSG00000198356	ASNA1 PPI subnetwork	0.15	0.900598	WNT4 (2.2)	SLC38A1 (2.1)	CUL5 (1.8)	PSMD13 (1.7)	ENSG00000258096 (1.5)	ZNF346 (1.5)	C11orf65 (1.5)	CDC42 (1.4)	WT1-AS (1.4)	ACAT1 (1.2)
GO:0046034	ATP metabolic process	0.15	0.900598	ENSG00000228397 (2.2)	ODF3 (2.2)	SCGB1C1 (2.2)	CUL5 (2.1)	ACAT1 (1.8)	SLC38A1 (1.3)	OBFC1 (1.2)	SLC25A15 (1.0)	SYNE1 (0.9)	MYNN (0.8)
MP:0004607	abnormal cervical atlas morphology	0.16	0.900598	WT1-AS (2.4)	TNRC6B (2.3)	KANK1 (2.2)	FOXO1 (2.0)	NPAT (1.9)	SLC38A1 (1.7)	SLC38A2 (1.7)	SALL1 (1.7)	ATM (1.5)	DMRT1 (1.4)
GO:0042976	activation of Janus kinase activity	0.16	0.900598	DMRT1 (1.8)	GREB1 (1.8)	KANK1 (1.6)	WT1-AS (1.2)	C11orf65 (1.0)	LRRC31 (0.9)	WNT4 (0.8)	FIP1L1 (0.7)	LNX1 (0.7)	MYNN (0.7)
ENSG00000120087	HOXB7 PPI subnetwork	0.16	0.900598	TNRC6B (3.4)	CDC42 (1.9)	SALL1 (1.8)	PSMD13 (1.7)	WNT4 (1.6)	FIP1L1 (1.3)	COG6 (1.2)	NPAT (1.2)	UIMC1 (1.1)	SH3PXD2A (1.0)
MP:0001433	polyphagia	0.16	0.900598	WNT4 (2.2)	SULT1B1 (1.3)	LRRC34 (1.2)	TNRC6B (1.1)	DMRT1 (1.0)	KANK1 (0.9)	GREB1 (0.8)	ENSG00000184378 (0.6)	ENSG00000258096 (0.6)	CUL5 (0.6)
MP:0002642	anisocytosis	0.16	0.900598	SLC25A15 (2.2)	TNRC6B (1.5)	HK3 (1.3)	C11orf65 (1.0)	ENSG00000258096 (0.8)	NPAT (0.5)	COG6 (0.5)	UIMC1 (0.5)	ENSG00000226403 (0.5)	MRPS31 (0.4)
ENSG00000163939	PBRM1 PPI subnetwork	0.16	0.900598	SCGB1C1 (4.0)	CUL5 (2.6)	FIP1L1 (2.0)	DMRT1 (1.9)	ATM (1.8)	TNRC6B (1.7)	SLC38A2 (1.4)	ENSG00000258096 (1.3)	ENSG00000228397 (1.2)	ENSG00000184378 (1.2)
ENSG00000196591	HDAC2 PPI subnetwork	0.16	0.900598	FIP1L1 (2.9)	TNRC6B (2.5)	NPAT (1.8)	TERT (1.7)	MRPS31 (1.6)	UIMC1 (1.5)	CUL5 (1.3)	SLC38A2 (1.3)	COG6 (0.9)	ATM (0.8)
GO:0009067	aspartate family amino acid biosynthetic process	0.16	0.900598	MYNN (1.9)	CUL5 (1.5)	ENSG00000184378 (1.3)	LNX1 (1.2)	KDELC2 (1.1)	OBFC1 (1.1)	DMRT1 (1.0)	SIRT3 (1.0)	COG6 (0.9)	SLC38A1 (0.9)
ENSG00000110367	DDX6 PPI subnetwork	0.16	0.900598	PSMD13 (2.4)	MYNN (1.8)	FIP1L1 (1.5)	UIMC1 (1.3)	TNRC6B (1.2)	MRPS31 (1.2)	BET1L (1.1)	WNT4 (0.9)	ATM (0.8)	RIC8A (0.8)
ENSG00000197818	SLC9A8 PPI subnetwork	0.16	0.900598	GREB1 (3.2)	SLC25A15 (1.8)	SLC38A1 (1.8)	SCGB1C1 (1.6)	LNX1 (1.4)	NPAT (1.4)	SLC38A2 (1.4)	KANK1 (1.3)	ENSG00000258096 (1.3)	LRRC34 (1.2)
GO:0008023	transcription elongation factor complex	0.16	0.900598	FIP1L1 (2.5)	MYNN (2.1)	MRPS31 (2.0)	CDC42-IT1 (1.6)	RIC8A (1.6)	TERT (1.5)	COG6 (1.5)	UIMC1 (1.4)	SYNE1 (1.3)	ENSG00000184378 (1.0)
GO:0006283	transcription-coupled nucleotide-excision repair	0.16	0.900598	TERT (2.5)	LINC00339 (2.4)	NPAT (2.3)	OBFC1 (2.2)	MRPS31 (2.0)	MYNN (2.0)	ATM (1.7)	ZNF346 (1.6)	RIC8A (1.5)	SIRT3 (1.3)
GO:0009126	purine nucleoside monophosphate metabolic process	0.16	0.900598	TERT (2.4)	SLC25A15 (2.3)	KDELC2 (2.0)	ENSG00000258096 (1.5)	LRRC34 (1.5)	LINC00339 (1.2)	OBFC1 (1.1)	C11orf65 (1.0)	ATM (0.9)	ACAT1 (0.8)
GO:0009167	purine ribonucleoside monophosphate metabolic process	0.16	0.900598	TERT (2.4)	SLC25A15 (2.3)	KDELC2 (2.0)	ENSG00000258096 (1.5)	LRRC34 (1.5)	LINC00339 (1.2)	OBFC1 (1.1)	C11orf65 (1.0)	ATM (0.9)	ACAT1 (0.8)
GO:0001840	neural plate development	0.16	0.900598	ENSG00000228397 (3.3)	EXPH5 (2.5)	TERT (2.3)	GREB1 (1.6)	C11orf65 (1.5)	ZNF346 (1.4)	ATM (1.3)	SIRT3 (1.1)	LRRC31 (0.9)	SALL1 (0.9)
ENSG00000136631	VPS45 PPI subnetwork	0.16	0.900598	OBFC1 (1.8)	LRRC31 (1.7)	FIP1L1 (1.4)	ACAT1 (1.3)	ZNF346 (1.3)	RIC8A (1.2)	COG6 (1.1)	UIMC1 (1.1)	SULT1B1 (1.1)	CUL5 (1.1)
GO:0005813	centrosome	0.16	0.900598	OBFC1 (2.4)	NPAT (2.2)	ATM (2.0)	LRRC34 (1.8)	CUL5 (1.5)	UIMC1 (1.3)	COG6 (1.1)	SYNE1 (1.1)	FIP1L1 (1.1)	SIRT3 (1.0)
ENSG00000196540	ENSG00000196540 PPI subnetwork	0.16	0.900598	GREB1 (2.7)	SLC38A1 (2.0)	LNX1 (1.8)	SLC25A15 (1.8)	KANK1 (1.4)	ENSG00000258096 (1.4)	TNRC6B (1.3)	SCGB1C1 (1.2)	SLC38A2 (1.0)	NPAT (1.0)
MP:0009548	abnormal platelet aggregation	0.16	0.900598	SCGB1C1 (3.9)	SH3PXD2A (2.4)	SIRT3 (1.9)	SLC38A1 (1.7)	LRRC34 (1.2)	KANK1 (1.2)	C11orf65 (1.0)	PSMD13 (0.9)	ENSG00000226403 (0.8)	GREB1 (0.7)
GO:0048645	organ formation	0.16	0.900598	WT1-AS (5.4)	SALL1 (3.3)	WNT4 (2.5)	ENSG00000228397 (2.3)	KANK1 (1.7)	LINC00339 (1.5)	SLC38A1 (1.4)	GREB1 (1.4)	ENSG00000226403 (1.3)	ODF3 (1.2)
MP:0002702	decreased circulating free fatty acid level	0.16	0.900598	MRPS31 (1.7)	FOXO1 (1.7)	CDC42-IT1 (1.7)	KANK1 (1.6)	ACAT1 (1.4)	SIRT3 (1.4)	SLC25A15 (1.4)	TNRC6B (1.1)	UIMC1 (0.9)	HK3 (0.7)
ENSG00000115738	ID2 PPI subnetwork	0.16	0.900598	SALL1 (2.4)	NPAT (2.4)	FOXO1 (1.9)	DMRT1 (1.6)	MYNN (1.5)	SLC38A2 (1.4)	SYNE1 (1.4)	SLC38A1 (1.4)	CUL5 (1.1)	LRRC31 (1.0)
ENSG00000139239	ENSG00000139239 PPI subnetwork	0.16	0.900598	SCGB1C1 (1.9)	KDELC2 (1.7)	PSMD13 (1.6)	CDC42-IT1 (1.5)	CDC42 (1.3)	SULT1B1 (1.3)	DMRT1 (1.0)	FIP1L1 (1.0)	ENSG00000226403 (0.9)	KANK1 (0.8)
GO:0000178	exosome (RNase complex)	0.16	0.900598	MRPS31 (4.1)	FIP1L1 (2.5)	CDC42-IT1 (2.4)	LINC00339 (2.2)	C11orf65 (2.2)	SLC25A15 (1.9)	MYNN (1.8)	LRRC31 (1.7)	UIMC1 (1.5)	SLC38A1 (1.5)
ENSG00000145391	SETD7 PPI subnetwork	0.16	0.900598	ODF3 (1.8)	LINC00339 (1.7)	GREB1 (1.6)	ENSG00000228397 (1.5)	SCGB1C1 (1.3)	ZNF346 (1.1)	BET1L (1.0)	TERT (1.0)	MRPS31 (0.9)	DMRT1 (0.8)
MP:0002442	abnormal leukocyte physiology	0.16	0.900598	CD44 (4.1)	HK3 (3.4)	SYNE1 (2.3)	SLC38A1 (1.2)	LRRC34 (1.0)	FOXO1 (0.8)	LINC00339 (0.8)	SIRT3 (0.8)	ENSG00000226403 (0.6)	RIC8A (0.3)
MP:0001672	abnormal embryogenesis/ development	0.16	0.900598	SALL1 (4.7)	TERT (2.3)	SLC25A15 (1.8)	NPAT (1.8)	KANK1 (1.5)	OBFC1 (1.3)	SH3PXD2A (1.3)	CUL5 (1.1)	FOXO1 (1.0)	TNRC6B (1.0)
GO:0004540	ribonuclease activity	0.16	0.900598	MRPS31 (3.1)	ATM (2.0)	LINC00339 (2.0)	OBFC1 (1.8)	ZNF346 (1.2)	SH3PXD2A (1.1)	SLC38A1 (0.9)	CD44 (0.9)	CDC42-IT1 (0.9)	UIMC1 (0.8)
MP:0008688	decreased interleukin-2 secretion	0.16	0.900598	CD44 (2.6)	SLC38A1 (2.4)	ENSG00000228397 (1.0)	EXPH5 (0.9)	DMRT1 (0.8)	COG6 (0.8)	NPAT (0.8)	WNT4 (0.7)	WT1-AS (0.5)	LNX1 (0.4)
KEGG_GALACTOSE_METABOLISM	KEGG_GALACTOSE_METABOLISM	0.16	0.900598	COG6 (2.1)	SLC25A15 (1.9)	TERT (1.9)	LRRC34 (1.8)	HK3 (1.7)	SULT1B1 (1.6)	ACAT1 (1.5)	SIRT3 (1.4)	C11orf65 (1.3)	SYNE1 (1.0)
MP:0000222	decreased neutrophil cell number	0.16	0.900598	HK3 (4.4)	WNT4 (1.4)	ATM (1.4)	CD44 (1.2)	ENSG00000226403 (1.1)	LINC00339 (1.0)	WT1-AS (1.0)	KANK1 (1.0)	LRRC34 (0.9)	TERT (0.8)
GO:0003713	transcription coactivator activity	0.16	0.900598	TNRC6B (2.9)	FIP1L1 (2.8)	UIMC1 (2.4)	MRPS31 (1.6)	CUL5 (1.3)	FOXO1 (1.2)	NPAT (1.2)	OBFC1 (1.2)	WNT4 (1.1)	CDC42 (1.1)
ENSG00000161016	RPL8 PPI subnetwork	0.16	0.900598	BET1L (2.1)	ENSG00000226403 (1.7)	UIMC1 (1.4)	SLC38A1 (1.3)	PSMD13 (1.2)	KANK1 (1.2)	KDELC2 (1.1)	WT1-AS (1.1)	CDC42 (1.0)	CD44 (1.0)
GO:0051052	regulation of DNA metabolic process	0.16	0.900598	ZNF346 (3.7)	CUL5 (3.0)	KDELC2 (2.9)	NPAT (2.7)	UIMC1 (2.6)	MYNN (2.3)	ENSG00000228397 (2.0)	FIP1L1 (1.9)	OBFC1 (1.8)	TERT (1.8)
ENSG00000120699	EXOSC8 PPI subnetwork	0.16	0.900598	MRPS31 (3.5)	UIMC1 (3.0)	MYNN (2.3)	C11orf65 (1.9)	FOXO1 (1.9)	CUL5 (1.5)	DMRT1 (1.4)	COG6 (1.3)	ATM (1.2)	CDC42-IT1 (1.1)
GO:0003887	DNA-directed DNA polymerase activity	0.16	0.900598	TERT (4.4)	NPAT (2.7)	OBFC1 (2.4)	UIMC1 (1.6)	ATM (1.5)	MYNN (1.5)	KDELC2 (1.4)	LINC00339 (1.2)	EXPH5 (1.2)	ENSG00000228397 (1.1)
GO:0007130	synaptonemal complex assembly	0.16	0.900598	DMRT1 (3.1)	C11orf65 (2.2)	ATM (2.1)	KDELC2 (2.1)	ENSG00000184378 (1.7)	ZNF346 (1.3)	SCGB1C1 (1.3)	LRRC34 (1.2)	TERT (1.1)	COG6 (1.1)
MP:0008168	decreased B-1a cell number	0.16	0.900598	TERT (3.2)	C11orf65 (2.0)	SLC38A1 (1.6)	ATM (1.5)	SULT1B1 (1.4)	FOXO1 (1.2)	ENSG00000228397 (0.9)	WNT4 (0.8)	SIRT3 (0.8)	EXPH5 (0.7)
GO:0000722	telomere maintenance via recombination	0.16	0.900598	OBFC1 (3.2)	NPAT (3.0)	ATM (2.4)	KDELC2 (2.4)	TERT (2.2)	LINC00339 (2.0)	ENSG00000228397 (1.8)	ZNF346 (1.5)	ENSG00000258096 (1.3)	UIMC1 (1.2)
GO:0097006	regulation of plasma lipoprotein particle levels	0.16	0.900598	CDC42-IT1 (2.5)	SLC25A15 (1.7)	HK3 (1.6)	SCGB1C1 (1.4)	LRRC31 (1.2)	ENSG00000226403 (1.1)	SH3PXD2A (0.9)	ACAT1 (0.6)	LRRC34 (0.6)	LNX1 (0.6)
ENSG00000120156	TEK PPI subnetwork	0.16	0.900598	LNX1 (2.4)	FOXO1 (2.1)	ENSG00000184378 (1.9)	MYNN (1.7)	WT1-AS (1.6)	HK3 (1.6)	KANK1 (1.4)	ENSG00000228397 (1.2)	SLC25A15 (1.2)	COG6 (1.1)
ENSG00000138180	CEP55 PPI subnetwork	0.16	0.900598	SYNE1 (2.4)	RIC8A (2.0)	OBFC1 (2.0)	BET1L (1.9)	LRRC31 (1.7)	SIRT3 (1.6)	HK3 (1.5)	CUL5 (1.5)	PSMD13 (1.4)	TNRC6B (1.4)
ENSG00000083093	PALB2 PPI subnetwork	0.16	0.900598	GREB1 (3.3)	SLC38A1 (2.1)	SLC25A15 (1.9)	LNX1 (1.6)	SLC38A2 (1.4)	ENSG00000258096 (1.4)	NPAT (1.2)	SCGB1C1 (1.2)	KANK1 (1.1)	ODF3 (1.1)
ENSG00000155329	ZCCHC10 PPI subnetwork	0.16	0.900598	CUL5 (3.1)	NPAT (2.4)	UIMC1 (2.4)	ZNF346 (2.3)	MYNN (2.1)	FIP1L1 (1.9)	TERT (1.9)	DMRT1 (1.8)	LRRC34 (1.5)	ENSG00000184378 (1.3)
GO:0009950	dorsal/ventral axis specification	0.16	0.900598	C11orf65 (3.0)	ODF3 (2.0)	EXPH5 (1.8)	COG6 (1.7)	SH3PXD2A (1.5)	WNT4 (1.2)	LINC00339 (1.1)	ENSG00000184378 (1.1)	MYNN (1.0)	SALL1 (0.8)
MP:0004787	abnormal dorsal aorta morphology	0.16	0.900598	SH3PXD2A (2.5)	SALL1 (2.0)	FOXO1 (1.9)	ENSG00000228397 (1.6)	SLC38A1 (1.2)	CD44 (1.1)	ATM (1.1)	OBFC1 (1.0)	ZNF346 (0.9)	MYNN (0.8)
MP:0001685	abnormal endoderm development	0.16	0.900598	SALL1 (2.8)	ENSG00000184378 (2.6)	GREB1 (2.2)	WNT4 (1.9)	SLC38A2 (1.8)	EXPH5 (1.5)	SCGB1C1 (1.4)	SULT1B1 (1.4)	ATM (1.2)	TNRC6B (1.2)
ENSG00000095637	SORBS1 PPI subnetwork	0.16	0.900598	GREB1 (3.3)	HK3 (1.9)	FOXO1 (1.5)	SH3PXD2A (1.5)	ENSG00000226403 (1.3)	RIC8A (1.1)	SYNE1 (1.1)	WNT4 (1.0)	SALL1 (1.0)	TNRC6B (0.9)
GO:0032024	positive regulation of insulin secretion	0.16	0.900598	SULT1B1 (2.2)	ENSG00000258096 (2.1)	OBFC1 (2.1)	LRRC31 (2.0)	TERT (1.9)	C11orf65 (1.7)	ENSG00000228397 (1.3)	WNT4 (1.0)	SIRT3 (0.9)	LNX1 (0.9)
ENSG00000143226	FCGR2A PPI subnetwork	0.16	0.900598	CD44 (2.6)	SCGB1C1 (2.3)	LRRC34 (1.9)	HK3 (1.7)	ODF3 (1.5)	SLC25A15 (1.5)	TNRC6B (1.2)	DMRT1 (1.2)	WT1-AS (1.1)	ENSG00000226403 (1.0)
GO:0046660	female sex differentiation	0.16	0.900598	GREB1 (5.8)	WT1-AS (4.1)	C11orf65 (2.3)	WNT4 (1.8)	DMRT1 (1.7)	ENSG00000228397 (1.5)	FOXO1 (1.3)	LINC00339 (1.3)	LRRC34 (1.2)	SH3PXD2A (1.2)
GO:0001935	endothelial cell proliferation	0.16	0.900598	ENSG00000184378 (2.3)	GREB1 (2.0)	WNT4 (2.0)	CUL5 (1.6)	LRRC31 (1.5)	SH3PXD2A (1.3)	COG6 (1.2)	SALL1 (1.1)	MYNN (1.0)	TERT (0.7)
MP:0003924	herniated diaphragm	0.16	0.900598	WT1-AS (8.4)	LNX1 (3.1)	DMRT1 (2.3)	FIP1L1 (1.6)	LRRC31 (1.3)	CUL5 (1.1)	KANK1 (1.0)	SALL1 (1.0)	OBFC1 (0.8)	SH3PXD2A (0.8)
ENSG00000112592	TBP PPI subnetwork	0.16	0.900598	FIP1L1 (3.1)	RIC8A (2.5)	MRPS31 (1.7)	UIMC1 (1.6)	SCGB1C1 (1.5)	TNRC6B (1.5)	NPAT (1.3)	DMRT1 (1.1)	CUL5 (1.0)	ATM (1.0)
ENSG00000067369	TP53BP1 PPI subnetwork	0.16	0.900598	NPAT (4.3)	ENSG00000228397 (2.1)	TNRC6B (1.9)	ATM (1.9)	SYNE1 (1.8)	TERT (1.8)	CUL5 (1.4)	OBFC1 (1.4)	KDELC2 (1.3)	FIP1L1 (1.1)
ENSG00000078328	RBFOX1 PPI subnetwork	0.16	0.900598	TNRC6B (2.8)	SH3PXD2A (2.5)	KANK1 (1.9)	SALL1 (1.7)	FIP1L1 (1.5)	C11orf65 (1.3)	RIC8A (1.1)	MRPS31 (1.1)	OBFC1 (1.0)	SIRT3 (0.8)
ENSG00000100413	POLR3H PPI subnetwork	0.16	0.900598	RIC8A (2.6)	ENSG00000226403 (2.1)	KANK1 (1.9)	NPAT (1.9)	BET1L (1.7)	ZNF346 (1.4)	SLC25A15 (1.4)	PSMD13 (1.3)	MYNN (1.1)	TERT (1.0)
MP:0005089	decreased double-negative T cell number	0.16	0.900598	WNT4 (2.6)	TNRC6B (1.7)	CD44 (1.7)	C11orf65 (1.4)	SLC38A2 (0.9)	OBFC1 (0.9)	TERT (0.9)	CDC42-IT1 (0.8)	ZNF346 (0.8)	ODF3 (0.7)
GO:0014706	striated muscle tissue development	0.16	0.900598	WT1-AS (2.4)	SH3PXD2A (1.7)	KANK1 (1.6)	ENSG00000226403 (1.4)	SYNE1 (1.2)	TNRC6B (1.2)	FOXO1 (0.8)	GREB1 (0.7)	SLC38A1 (0.7)	SALL1 (0.6)
GO:0046470	phosphatidylcholine metabolic process	0.16	0.900598	LRRC34 (3.3)	DMRT1 (1.8)	ENSG00000184378 (1.7)	ENSG00000258096 (1.7)	SLC25A15 (1.7)	SIRT3 (1.6)	SYNE1 (1.5)	LNX1 (1.5)	SCGB1C1 (1.3)	C11orf65 (1.2)
GO:0055088	lipid homeostasis	0.16	0.900598	SLC25A15 (2.7)	SIRT3 (1.3)	SH3PXD2A (1.2)	LNX1 (1.0)	DMRT1 (0.9)	ENSG00000226403 (0.7)	SULT1B1 (0.7)	ACAT1 (0.7)	CDC42-IT1 (0.6)	KANK1 (0.5)
ENSG00000156603	MED19 PPI subnetwork	0.16	0.900598	BET1L (3.0)	MRPS31 (2.7)	CUL5 (2.5)	NPAT (2.3)	RIC8A (2.1)	MYNN (2.0)	FIP1L1 (1.9)	ZNF346 (1.8)	UIMC1 (1.6)	PSMD13 (1.4)
GO:0046620	regulation of organ growth	0.16	0.900598	WT1-AS (4.6)	KANK1 (1.6)	ENSG00000226403 (1.5)	DMRT1 (1.4)	FOXO1 (1.0)	SLC25A15 (1.0)	SALL1 (1.0)	ENSG00000258096 (0.9)	GREB1 (0.8)	KDELC2 (0.7)
ENSG00000163050	ADCK3 PPI subnetwork	0.16	0.900598	COG6 (3.5)	LRRC31 (2.6)	TNRC6B (2.3)	UIMC1 (1.9)	CUL5 (1.8)	ODF3 (1.7)	EXPH5 (1.6)	SYNE1 (1.6)	ATM (1.5)	SLC38A2 (1.4)
ENSG00000134014	ELP3 PPI subnetwork	0.16	0.900598	RIC8A (3.0)	BET1L (1.9)	CDC42-IT1 (1.7)	UIMC1 (1.7)	SLC38A2 (1.6)	FIP1L1 (1.4)	ENSG00000184378 (1.3)	CD44 (1.2)	MRPS31 (1.1)	SYNE1 (1.0)
GO:0016866	intramolecular transferase activity	0.16	0.900598	CUL5 (2.6)	ACAT1 (2.2)	MRPS31 (1.9)	MYNN (1.7)	BET1L (1.7)	ATM (1.4)	ZNF346 (1.4)	SYNE1 (1.4)	KDELC2 (1.3)	LRRC31 (1.2)
GO:0005924	cell-substrate adherens junction	0.16	0.900598	KANK1 (2.5)	SYNE1 (2.1)	RIC8A (1.2)	HK3 (1.1)	SCGB1C1 (1.1)	FOXO1 (0.8)	SH3PXD2A (0.8)	CD44 (0.8)	SLC38A1 (0.7)	BET1L (0.6)
GO:0006271	DNA strand elongation involved in DNA replication	0.16	0.900598	NPAT (3.5)	OBFC1 (3.0)	KDELC2 (2.3)	ENSG00000228397 (2.2)	ATM (2.1)	TERT (1.9)	ENSG00000258096 (1.8)	LINC00339 (1.4)	MYNN (1.1)	LRRC31 (0.9)
REACTOME_APCC:MEDIATED_DEGRADATION_OF_CELL_CYCLE_PROTEINS	REACTOME_APCC:MEDIATED_DEGRADATION_OF_CELL_CYCLE_PROTEINS	0.16	0.900598	PSMD13 (4.8)	CDC42 (2.2)	MRPS31 (2.0)	COG6 (1.4)	LNX1 (1.2)	FIP1L1 (1.0)	LINC00339 (1.0)	CDC42-IT1 (0.8)	WNT4 (0.8)	ZNF346 (0.8)
REACTOME_REGULATION_OF_MITOTIC_CELL_CYCLE	REACTOME_REGULATION_OF_MITOTIC_CELL_CYCLE	0.16	0.900598	PSMD13 (4.8)	CDC42 (2.2)	MRPS31 (2.0)	COG6 (1.4)	LNX1 (1.2)	FIP1L1 (1.0)	LINC00339 (1.0)	CDC42-IT1 (0.8)	WNT4 (0.8)	ZNF346 (0.8)
GO:0060070	canonical Wnt receptor signaling pathway	0.16	0.900598	WNT4 (3.1)	SH3PXD2A (2.8)	EXPH5 (2.7)	ENSG00000228397 (2.2)	SALL1 (1.7)	ZNF346 (1.7)	GREB1 (1.7)	SLC38A2 (1.3)	KANK1 (1.2)	ATM (1.1)
REACTOME_CYTOCHROME_P450_:_ARRANGED_BY_SUBSTRATE_TYPE	REACTOME_CYTOCHROME_P450_:_ARRANGED_BY_SUBSTRATE_TYPE	0.16	0.900598	SULT1B1 (3.7)	EXPH5 (2.7)	SLC25A15 (2.5)	ODF3 (1.6)	DMRT1 (1.2)	MRPS31 (1.2)	HK3 (1.1)	C11orf65 (1.0)	ENSG00000226403 (0.9)	LNX1 (0.7)
REACTOME_MITOTIC_G1:G1S_PHASES	REACTOME_MITOTIC_G1:G1S_PHASES	0.16	0.900598	PSMD13 (3.3)	NPAT (2.7)	KDELC2 (1.7)	MRPS31 (1.6)	ZNF346 (1.3)	FIP1L1 (1.1)	CDC42 (1.1)	UIMC1 (1.0)	ACAT1 (1.0)	ENSG00000228397 (1.0)
GO:0031571	mitotic cell cycle G1/S transition DNA damage checkpoint	0.16	0.900598	PSMD13 (3.2)	ZNF346 (2.1)	ENSG00000228397 (2.0)	CDC42 (1.7)	MYNN (1.5)	BET1L (1.4)	MRPS31 (1.3)	C11orf65 (1.2)	CUL5 (0.9)	RIC8A (0.9)
ENSG00000109103	UNC119 PPI subnetwork	0.16	0.900598	LINC00339 (2.7)	HK3 (2.2)	SLC25A15 (1.9)	PSMD13 (1.5)	SULT1B1 (1.4)	ACAT1 (1.4)	SIRT3 (1.4)	OBFC1 (1.3)	C11orf65 (1.2)	CDC42-IT1 (1.2)
GO:0007004	telomere maintenance via telomerase	0.16	0.900598	ZNF346 (2.9)	TERT (2.9)	OBFC1 (2.7)	ATM (2.4)	CUL5 (2.2)	NPAT (1.8)	UIMC1 (1.8)	ENSG00000258096 (1.6)	SLC38A1 (1.3)	CDC42-IT1 (1.3)
GO:0032204	regulation of telomere maintenance	0.16	0.900598	ZNF346 (3.8)	CDC42-IT1 (2.5)	OBFC1 (2.3)	TERT (2.2)	ATM (1.9)	LINC00339 (1.7)	NPAT (1.6)	ENSG00000184378 (1.4)	MYNN (1.3)	CUL5 (1.3)
GO:0035064	methylated histone residue binding	0.16	0.900598	UIMC1 (2.8)	ZNF346 (2.5)	FIP1L1 (2.2)	MRPS31 (2.0)	BET1L (1.6)	KDELC2 (1.5)	NPAT (1.2)	SH3PXD2A (1.1)	EXPH5 (1.1)	DMRT1 (1.0)
ENSG00000141968	VAV1 PPI subnetwork	0.16	0.900598	HK3 (2.3)	RIC8A (1.9)	FOXO1 (1.9)	SLC38A1 (1.5)	KANK1 (1.5)	CD44 (1.2)	LRRC31 (1.2)	CDC42 (1.1)	TNRC6B (1.1)	PSMD13 (0.9)
ENSG00000180008	SOCS4 PPI subnetwork	0.16	0.900598	C11orf65 (2.5)	HK3 (2.3)	FOXO1 (1.9)	WNT4 (1.4)	ENSG00000258096 (1.2)	ENSG00000228397 (1.1)	KANK1 (1.0)	SULT1B1 (0.8)	CD44 (0.7)	WT1-AS (0.7)
KEGG_GLUTATHIONE_METABOLISM	KEGG_GLUTATHIONE_METABOLISM	0.16	0.900598	ACAT1 (2.4)	ODF3 (2.0)	OBFC1 (1.8)	ENSG00000226403 (1.7)	SLC25A15 (1.6)	GREB1 (1.4)	LINC00339 (1.4)	LRRC34 (1.4)	EXPH5 (1.3)	KDELC2 (1.2)
ENSG00000166908	PIP4K2C PPI subnetwork	0.16	0.900598	LRRC31 (2.5)	ATM (2.1)	COG6 (2.1)	EXPH5 (2.0)	NPAT (1.9)	TNRC6B (1.6)	OBFC1 (1.4)	SYNE1 (1.4)	ENSG00000226403 (1.3)	SLC38A2 (1.2)
MP:0003383	abnormal gluconeogenesis	0.16	0.900598	FOXO1 (2.3)	SLC38A2 (2.2)	SLC25A15 (1.9)	SALL1 (1.6)	SLC38A1 (1.4)	SH3PXD2A (1.3)	LNX1 (1.2)	MRPS31 (1.2)	KANK1 (1.1)	MYNN (1.0)
GO:0005035	death receptor activity	0.16	0.900598	WNT4 (1.9)	CD44 (1.7)	SULT1B1 (1.2)	TERT (1.2)	GREB1 (1.2)	SH3PXD2A (1.1)	SCGB1C1 (1.0)	WT1-AS (1.0)	FOXO1 (0.7)	ENSG00000258096 (0.7)
GO:0071843	cellular component biogenesis at cellular level	0.16	0.900598	MRPS31 (2.6)	FIP1L1 (2.4)	TERT (1.7)	ATM (1.6)	RIC8A (1.5)	NPAT (1.3)	UIMC1 (1.3)	ZNF346 (1.2)	CUL5 (1.1)	DMRT1 (1.0)
ENSG00000087191	PSMC5 PPI subnetwork	0.16	0.900598	PSMD13 (5.3)	MRPS31 (2.3)	CDC42-IT1 (1.8)	RIC8A (1.7)	FIP1L1 (1.6)	CUL5 (1.2)	CDC42 (1.2)	MYNN (1.1)	BET1L (1.0)	SLC25A15 (0.8)
GO:0008610	lipid biosynthetic process	0.16	0.900598	SIRT3 (2.1)	SULT1B1 (1.7)	LRRC31 (1.6)	LRRC34 (1.3)	LINC00339 (1.3)	WNT4 (1.1)	ACAT1 (0.9)	SLC38A2 (0.9)	GREB1 (0.9)	DMRT1 (0.8)
MP:0006262	testis tumor	0.16	0.900598	LRRC34 (3.6)	DMRT1 (3.3)	WT1-AS (2.3)	LINC00339 (2.3)	GREB1 (2.1)	SIRT3 (1.6)	FOXO1 (1.1)	TNRC6B (1.0)	C11orf65 (0.8)	SH3PXD2A (0.7)
GO:0016409	palmitoyltransferase activity	0.16	0.900598	KDELC2 (3.1)	SLC25A15 (2.4)	LNX1 (2.4)	BET1L (2.2)	OBFC1 (1.8)	RIC8A (1.4)	EXPH5 (1.4)	ZNF346 (1.2)	ACAT1 (1.1)	DMRT1 (1.0)
GO:0017046	peptide hormone binding	0.16	0.900598	GREB1 (4.0)	FOXO1 (3.4)	WNT4 (2.8)	WT1-AS (2.1)	KANK1 (2.1)	LNX1 (1.2)	LINC00339 (1.1)	CDC42-IT1 (0.8)	SH3PXD2A (0.8)	TERT (0.7)
REACTOME_STABILIZATION_OF_P53	REACTOME_STABILIZATION_OF_P53	0.16	0.900598	PSMD13 (6.0)	CDC42 (2.3)	MYNN (1.4)	MRPS31 (1.4)	BET1L (1.3)	WNT4 (1.0)	RIC8A (0.9)	CDC42-IT1 (0.9)	ENSG00000228397 (0.9)	GREB1 (0.8)
GO:0023019	signal transduction involved in regulation of gene expression	0.16	0.900598	GREB1 (3.0)	EXPH5 (2.2)	DMRT1 (1.9)	LNX1 (1.8)	ENSG00000184378 (1.3)	SALL1 (1.2)	FIP1L1 (0.9)	OBFC1 (0.9)	LRRC31 (0.8)	KDELC2 (0.8)
GO:0006790	sulfur compound metabolic process	0.16	0.900598	LNX1 (2.8)	SLC25A15 (2.3)	LINC00339 (1.9)	SULT1B1 (1.8)	GREB1 (1.7)	ENSG00000226403 (1.5)	KDELC2 (1.3)	SIRT3 (0.9)	ACAT1 (0.9)	COG6 (0.9)
GO:0001944	vasculature development	0.16	0.900598	SH3PXD2A (2.8)	KANK1 (2.2)	ENSG00000226403 (1.6)	SALL1 (1.1)	EXPH5 (1.0)	WNT4 (0.9)	LNX1 (0.8)	KDELC2 (0.6)	WT1-AS (0.6)	DMRT1 (0.5)
GO:0051567	histone H3-K9 methylation	0.16	0.900598	TERT (3.4)	ENSG00000258096 (2.4)	ENSG00000228397 (2.4)	NPAT (1.7)	ENSG00000226403 (1.5)	UIMC1 (1.5)	ODF3 (1.4)	ZNF346 (1.2)	SLC25A15 (1.1)	ATM (1.0)
GO:0009452	RNA capping	0.16	0.900598	RIC8A (2.4)	MYNN (2.4)	BET1L (2.3)	MRPS31 (1.9)	LRRC34 (1.8)	ZNF346 (1.8)	FIP1L1 (1.7)	CUL5 (1.6)	DMRT1 (1.6)	SIRT3 (1.4)
ENSG00000187899	ENSG00000187899 PPI subnetwork	0.16	0.900598	ENSG00000226403 (2.0)	PSMD13 (1.8)	MRPS31 (1.6)	FIP1L1 (1.5)	KANK1 (1.5)	CD44 (1.3)	ATM (1.3)	SLC25A15 (1.3)	RIC8A (1.3)	NPAT (1.2)
ENSG00000135090	TAOK3 PPI subnetwork	0.16	0.900598	COG6 (2.4)	TNRC6B (2.1)	UIMC1 (2.0)	ODF3 (1.9)	EXPH5 (1.8)	LRRC31 (1.7)	ZNF346 (1.4)	CUL5 (1.4)	NPAT (1.3)	SLC38A2 (1.3)
MP:0005350	increased susceptibility to autoimmune disorder	0.16	0.900598	CD44 (2.9)	ENSG00000228397 (1.4)	ODF3 (1.4)	NPAT (1.3)	DMRT1 (1.3)	SH3PXD2A (0.9)	SCGB1C1 (0.9)	ZNF346 (0.8)	SULT1B1 (0.8)	UIMC1 (0.8)
REACTOME_MRNA_CAPPING	REACTOME_MRNA_CAPPING	0.16	0.900598	PSMD13 (3.1)	RIC8A (2.8)	BET1L (2.7)	MYNN (2.4)	MRPS31 (2.4)	FIP1L1 (2.3)	NPAT (1.4)	SIRT3 (1.4)	SLC25A15 (1.3)	DMRT1 (1.2)
GO:0042147	retrograde transport, endosome to Golgi	0.16	0.900598	RIC8A (2.4)	COG6 (1.8)	ENSG00000228397 (1.7)	KDELC2 (1.7)	SH3PXD2A (1.7)	CUL5 (1.5)	ZNF346 (1.4)	OBFC1 (1.4)	CDC42 (1.1)	BET1L (1.1)
ENSG00000168255	POLR2J3 PPI subnetwork	0.16	0.900598	BET1L (2.8)	PSMD13 (2.7)	FIP1L1 (2.2)	RIC8A (2.2)	DMRT1 (1.9)	NPAT (1.4)	LINC00339 (1.2)	SIRT3 (1.2)	MRPS31 (1.1)	FOXO1 (1.1)
ENSG00000197373	ENSG00000197373 PPI subnetwork	0.16	0.900598	BET1L (2.8)	PSMD13 (2.7)	FIP1L1 (2.2)	RIC8A (2.2)	DMRT1 (1.9)	NPAT (1.4)	LINC00339 (1.2)	SIRT3 (1.2)	MRPS31 (1.1)	FOXO1 (1.1)
GO:0010817	regulation of hormone levels	0.16	0.900598	WNT4 (2.8)	GREB1 (2.8)	SULT1B1 (2.2)	ENSG00000258096 (1.7)	LNX1 (1.4)	TERT (1.3)	LRRC31 (1.1)	SLC25A15 (1.0)	WT1-AS (0.9)	SALL1 (0.9)
ENSG00000135424	ITGA7 PPI subnetwork	0.16	0.900598	KDELC2 (2.2)	CD44 (1.4)	SYNE1 (1.3)	KANK1 (1.1)	SLC38A2 (1.1)	WNT4 (0.9)	SLC25A15 (0.8)	TERT (0.7)	ENSG00000226403 (0.7)	CDC42 (0.6)
MP:0001153	small seminiferous tubules	0.16	0.900598	DMRT1 (4.9)	C11orf65 (2.4)	WT1-AS (1.8)	KANK1 (1.6)	GREB1 (1.6)	COG6 (1.4)	KDELC2 (1.1)	WNT4 (1.1)	SLC25A15 (1.1)	UIMC1 (1.0)
KEGG_NUCLEOTIDE_EXCISION_REPAIR	KEGG_NUCLEOTIDE_EXCISION_REPAIR	0.16	0.900598	OBFC1 (3.0)	KDELC2 (2.1)	MRPS31 (2.0)	NPAT (2.0)	ZNF346 (2.0)	LINC00339 (1.8)	UIMC1 (1.6)	ATM (1.6)	TERT (1.5)	ENSG00000228397 (1.3)
ENSG00000151247	EIF4E PPI subnetwork	0.16	0.900598	FIP1L1 (2.4)	ATM (2.0)	CUL5 (1.5)	PSMD13 (1.4)	ENSG00000228397 (1.3)	CDC42 (1.2)	SLC38A1 (1.2)	MRPS31 (1.2)	KANK1 (1.1)	ACAT1 (0.7)
ENSG00000169306	IL1RAPL1 PPI subnetwork	0.16	0.900598	SULT1B1 (4.7)	LRRC31 (1.7)	SLC38A1 (1.3)	CD44 (1.3)	SYNE1 (1.2)	EXPH5 (1.1)	SCGB1C1 (0.9)	NPAT (0.9)	LNX1 (0.9)	CDC42-IT1 (0.8)
KEGG_P53_SIGNALING_PATHWAY	KEGG_P53_SIGNALING_PATHWAY	0.16	0.900598	NPAT (2.1)	FOXO1 (2.0)	SLC25A15 (1.7)	ENSG00000228397 (1.7)	UIMC1 (1.6)	KDELC2 (1.5)	SLC38A2 (1.4)	CD44 (1.4)	ATM (1.3)	MYNN (1.2)
ENSG00000146677	ENSG00000146677 PPI subnetwork	0.16	0.900598	ENSG00000226403 (2.4)	SULT1B1 (2.2)	LRRC34 (1.7)	KDELC2 (1.5)	BET1L (1.3)	DMRT1 (1.1)	CDC42 (0.9)	WT1-AS (0.9)	SLC38A1 (0.8)	KANK1 (0.7)
GO:0022613	ribonucleoprotein complex biogenesis	0.16	0.900598	MRPS31 (2.4)	FIP1L1 (2.3)	TERT (1.8)	ATM (1.7)	RIC8A (1.6)	UIMC1 (1.5)	NPAT (1.4)	ZNF346 (1.2)	ENSG00000226403 (1.1)	MYNN (1.1)
ENSG00000120696	KBTBD7 PPI subnetwork	0.16	0.900598	LINC00339 (3.6)	CUL5 (3.6)	MYNN (2.2)	SLC38A2 (2.0)	ATM (1.9)	NPAT (1.9)	LNX1 (1.5)	WNT4 (1.3)	EXPH5 (1.3)	ZNF346 (1.2)
MP:0008102	lymph node hyperplasia	0.16	0.900598	CD44 (3.2)	FOXO1 (1.9)	ENSG00000184378 (1.7)	UIMC1 (1.6)	LNX1 (1.4)	SULT1B1 (1.2)	NPAT (1.2)	MRPS31 (1.0)	ENSG00000258096 (1.0)	WNT4 (1.0)
GO:0030324	lung development	0.16	0.900598	ENSG00000226403 (2.3)	SH3PXD2A (2.3)	EXPH5 (2.0)	ENSG00000258096 (1.9)	WNT4 (1.8)	ENSG00000228397 (1.3)	KANK1 (1.1)	SALL1 (1.0)	TERT (0.9)	LINC00339 (0.9)
ENSG00000115232	ITGA4 PPI subnetwork	0.16	0.900598	CD44 (3.4)	SYNE1 (2.1)	DMRT1 (1.7)	LRRC34 (1.4)	UIMC1 (1.1)	HK3 (1.1)	RIC8A (1.0)	BET1L (1.0)	SH3PXD2A (0.9)	OBFC1 (0.9)
ENSG00000165288	BRWD3 PPI subnetwork	0.16	0.900598	CUL5 (5.5)	LINC00339 (2.9)	NPAT (2.3)	UIMC1 (2.2)	ZNF346 (2.0)	COG6 (1.8)	ATM (1.8)	MYNN (1.6)	C11orf65 (1.5)	ACAT1 (1.4)
MP:0002781	increased circulating testosterone level	0.16	0.900598	GREB1 (6.7)	FOXO1 (2.2)	SALL1 (2.0)	WT1-AS (1.8)	SLC38A2 (1.5)	SLC25A15 (1.4)	DMRT1 (1.4)	SIRT3 (1.2)	WNT4 (1.0)	SULT1B1 (0.9)
GO:0019903	protein phosphatase binding	0.16	0.900598	CUL5 (1.8)	LNX1 (1.7)	KANK1 (1.6)	LINC00339 (1.1)	COG6 (0.8)	ZNF346 (0.8)	EXPH5 (0.8)	ODF3 (0.8)	ACAT1 (0.8)	TNRC6B (0.8)
ENSG00000196374	HIST1H2BM PPI subnetwork	0.16	0.900598	SCGB1C1 (3.0)	FIP1L1 (2.2)	UIMC1 (1.7)	ENSG00000228397 (1.4)	DMRT1 (1.4)	C11orf65 (1.3)	KDELC2 (1.3)	CUL5 (1.2)	ENSG00000258096 (1.1)	ATM (1.0)
ENSG00000136950	ARPC5L PPI subnetwork	0.16	0.900598	CDC42-IT1 (3.0)	CDC42 (2.9)	SYNE1 (2.5)	SULT1B1 (2.0)	OBFC1 (1.5)	RIC8A (1.5)	PSMD13 (1.4)	TERT (1.4)	ENSG00000184378 (1.1)	SH3PXD2A (0.8)
GO:0006893	Golgi to plasma membrane transport	0.16	0.900598	LNX1 (2.2)	CUL5 (2.0)	SYNE1 (1.9)	ENSG00000184378 (1.8)	EXPH5 (1.7)	BET1L (1.6)	COG6 (1.5)	OBFC1 (1.4)	KANK1 (1.3)	ODF3 (1.2)
MP:0002619	abnormal lymphocyte morphology	0.16	0.900598	CD44 (1.5)	FOXO1 (1.5)	ENSG00000184378 (1.4)	COG6 (1.3)	TNRC6B (1.1)	OBFC1 (1.0)	WNT4 (1.0)	EXPH5 (0.7)	UIMC1 (0.6)	NPAT (0.5)
GO:0032835	glomerulus development	0.16	0.900598	WT1-AS (4.9)	ENSG00000228397 (3.2)	ENSG00000258096 (2.6)	KDELC2 (2.5)	WNT4 (1.6)	KANK1 (1.4)	C11orf65 (1.1)	LNX1 (1.0)	DMRT1 (0.9)	SALL1 (0.9)
MP:0001684	abnormal axial mesoderm	0.16	0.900598	ENSG00000184378 (2.2)	KANK1 (2.1)	SALL1 (1.7)	ENSG00000226403 (1.6)	WNT4 (1.5)	ATM (1.5)	EXPH5 (1.3)	SIRT3 (1.3)	GREB1 (1.2)	SCGB1C1 (1.0)
ENSG00000204843	DCTN1 PPI subnetwork	0.16	0.900598	OBFC1 (3.5)	CDC42 (2.3)	COG6 (2.3)	CDC42-IT1 (2.0)	ZNF346 (1.5)	PSMD13 (1.4)	SULT1B1 (1.4)	FIP1L1 (1.2)	RIC8A (1.1)	TNRC6B (1.1)
REACTOME_ASSOCIATION_OF_LICENSING_FACTORS_WITH_THE_PRE:REPLICATIVE_COMPLEX	REACTOME_ASSOCIATION_OF_LICENSING_FACTORS_WITH_THE_PRE:REPLICATIVE_COMPLEX	0.16	0.900598	NPAT (3.5)	ENSG00000228397 (2.3)	TERT (2.2)	ENSG00000258096 (2.0)	FIP1L1 (1.6)	OBFC1 (1.2)	SCGB1C1 (1.1)	MRPS31 (1.0)	ZNF346 (1.0)	LNX1 (0.9)
ENSG00000102977	ACD PPI subnetwork	0.16	0.900598	ENSG00000228397 (2.4)	DMRT1 (2.3)	C11orf65 (1.5)	BET1L (1.4)	TNRC6B (1.4)	ZNF346 (1.1)	SCGB1C1 (1.1)	UIMC1 (1.0)	ENSG00000226403 (1.0)	SLC38A1 (1.0)
MP:0001958	emphysema	0.17	0.900598	HK3 (1.9)	CD44 (1.6)	ENSG00000228397 (1.5)	SCGB1C1 (1.4)	DMRT1 (1.2)	SYNE1 (1.2)	MYNN (1.1)	ENSG00000184378 (0.8)	SALL1 (0.7)	ACAT1 (0.6)
ENSG00000215694	ENSG00000215694 PPI subnetwork	0.17	0.900598	ATM (2.6)	ZNF346 (2.6)	NPAT (2.2)	DMRT1 (2.0)	BET1L (1.8)	COG6 (1.2)	LNX1 (1.1)	OBFC1 (1.1)	WT1-AS (1.1)	LINC00339 (1.0)
ENSG00000168393	DTYMK PPI subnetwork	0.17	0.900598	ATM (2.6)	ZNF346 (2.6)	NPAT (2.2)	DMRT1 (2.0)	BET1L (1.8)	COG6 (1.2)	LNX1 (1.1)	OBFC1 (1.1)	WT1-AS (1.1)	LINC00339 (1.0)
ENSG00000145192	AHSG PPI subnetwork	0.17	0.900598	WNT4 (3.3)	SLC25A15 (1.4)	SALL1 (1.3)	TNRC6B (1.2)	TERT (1.2)	LINC00339 (1.1)	SH3PXD2A (1.1)	SLC38A2 (1.0)	SCGB1C1 (0.8)	ACAT1 (0.8)
REACTOME_ETHANOL_OXIDATION	REACTOME_ETHANOL_OXIDATION	0.17	0.900598	SULT1B1 (3.1)	EXPH5 (2.2)	ACAT1 (1.7)	LRRC31 (1.7)	TERT (1.3)	WNT4 (1.3)	SIRT3 (1.2)	ENSG00000226403 (1.1)	MRPS31 (1.0)	SLC25A15 (1.0)
ENSG00000183684	ALYREF PPI subnetwork	0.17	0.900598	FIP1L1 (3.3)	UIMC1 (2.6)	PSMD13 (1.8)	ATM (1.6)	CDC42 (1.0)	CUL5 (1.0)	CDC42-IT1 (0.9)	LINC00339 (0.8)	DMRT1 (0.7)	NPAT (0.7)
KEGG_STEROID_HORMONE_BIOSYNTHESIS	KEGG_STEROID_HORMONE_BIOSYNTHESIS	0.17	0.900598	SULT1B1 (4.6)	EXPH5 (3.2)	LNX1 (2.3)	LRRC31 (2.2)	SLC25A15 (2.1)	ODF3 (1.3)	MRPS31 (1.1)	SH3PXD2A (1.0)	WNT4 (0.9)	OBFC1 (0.8)
MP:0011106	partial embryonic lethality before somite formation	0.17	0.900598	SALL1 (2.9)	ENSG00000228397 (2.2)	TNRC6B (2.0)	WT1-AS (1.5)	GREB1 (1.4)	CD44 (1.3)	ENSG00000226403 (1.2)	FOXO1 (1.0)	KANK1 (1.0)	RIC8A (0.9)
GO:0004175	endopeptidase activity	0.17	0.900598	ODF3 (2.4)	SULT1B1 (2.4)	WNT4 (2.3)	WT1-AS (2.1)	ENSG00000184378 (1.8)	SH3PXD2A (1.7)	KDELC2 (1.4)	ACAT1 (1.3)	C11orf65 (1.3)	PSMD13 (1.2)
GO:0035967	cellular response to topologically incorrect protein	0.17	0.900598	SLC38A2 (4.2)	ENSG00000184378 (2.4)	BET1L (1.9)	KDELC2 (1.7)	MYNN (1.6)	SLC38A1 (1.2)	LINC00339 (1.1)	EXPH5 (1.0)	UIMC1 (1.0)	LNX1 (1.0)
GO:0061138	morphogenesis of a branching epithelium	0.17	0.900598	SALL1 (3.0)	WNT4 (2.9)	GREB1 (2.2)	WT1-AS (2.2)	KANK1 (2.1)	SH3PXD2A (1.6)	ENSG00000258096 (1.5)	ENSG00000228397 (1.4)	EXPH5 (1.4)	ENSG00000226403 (1.3)
GO:0060444	branching involved in mammary gland duct morphogenesis	0.17	0.900598	GREB1 (3.4)	SH3PXD2A (3.1)	WT1-AS (1.6)	ZNF346 (1.5)	SALL1 (1.5)	EXPH5 (1.4)	OBFC1 (1.4)	DMRT1 (1.2)	SCGB1C1 (1.2)	CDC42-IT1 (1.2)
GO:0045814	negative regulation of gene expression, epigenetic	0.17	0.900598	ODF3 (2.6)	LRRC34 (2.5)	TERT (2.1)	BET1L (1.7)	RIC8A (1.3)	NPAT (1.2)	CUL5 (1.2)	SULT1B1 (1.1)	UIMC1 (1.1)	FIP1L1 (1.0)
GO:0034142	toll-like receptor 4 signaling pathway	0.17	0.900598	CDC42-IT1 (4.6)	SULT1B1 (1.7)	BET1L (1.4)	CD44 (1.3)	LRRC31 (1.2)	ENSG00000228397 (1.1)	SIRT3 (1.0)	RIC8A (0.9)	UIMC1 (0.9)	OBFC1 (0.8)
GO:0003705	RNA polymerase II distal enhancer sequence-specific DNA binding transcription factor activity	0.17	0.900598	SALL1 (2.5)	TNRC6B (1.8)	FOXO1 (1.4)	DMRT1 (1.4)	ENSG00000258096 (1.4)	LRRC31 (1.3)	SH3PXD2A (1.2)	WNT4 (1.2)	GREB1 (1.1)	SLC38A2 (0.9)
MP:0001882	abnormal lactation	0.17	0.900598	GREB1 (4.5)	WNT4 (2.2)	FOXO1 (1.9)	KANK1 (1.6)	SLC25A15 (1.5)	CD44 (1.0)	ODF3 (0.9)	SYNE1 (0.8)	EXPH5 (0.8)	TNRC6B (0.7)
MP:0002875	decreased erythrocyte cell number	0.17	0.900598	SLC25A15 (2.1)	TNRC6B (2.0)	CD44 (1.7)	NPAT (1.5)	FOXO1 (1.4)	ENSG00000258096 (1.1)	RIC8A (0.7)	CUL5 (0.6)	SALL1 (0.6)	SLC38A2 (0.6)
MP:0001718	abnormal visceral yolk sac morphology	0.17	0.900598	SALL1 (2.2)	SLC25A15 (2.2)	CDC42-IT1 (2.1)	KANK1 (1.8)	TNRC6B (1.3)	GREB1 (1.2)	NPAT (1.2)	ENSG00000258096 (1.1)	UIMC1 (1.0)	CD44 (1.0)
ENSG00000161638	ITGA5 PPI subnetwork	0.17	0.900598	SALL1 (2.9)	RIC8A (2.5)	SH3PXD2A (1.7)	ENSG00000258096 (1.6)	WNT4 (1.4)	WT1-AS (1.3)	ENSG00000184378 (1.1)	C11orf65 (1.1)	SCGB1C1 (1.0)	EXPH5 (1.0)
ENSG00000182093	WRB PPI subnetwork	0.17	0.900598	TNRC6B (5.1)	FOXO1 (1.9)	COG6 (1.6)	SLC38A1 (1.6)	ATM (1.6)	SYNE1 (1.2)	SIRT3 (1.0)	EXPH5 (0.9)	SLC25A15 (0.8)	CDC42 (0.7)
ENSG00000165280	VCP PPI subnetwork	0.17	0.900598	PSMD13 (2.7)	ENSG00000184378 (1.9)	EXPH5 (1.9)	FIP1L1 (1.7)	MYNN (1.5)	SLC38A2 (1.5)	GREB1 (1.3)	FOXO1 (1.3)	KANK1 (1.2)	ENSG00000226403 (1.0)
MP:0002599	increased mean platelet volume	0.17	0.900598	SLC25A15 (3.0)	LNX1 (1.9)	SULT1B1 (1.6)	C11orf65 (1.5)	NPAT (1.4)	SIRT3 (1.3)	ENSG00000226403 (1.2)	CDC42-IT1 (1.1)	RIC8A (1.0)	LRRC34 (0.9)
ENSG00000142871	CYR61 PPI subnetwork	0.17	0.900598	OBFC1 (2.5)	ACAT1 (2.1)	COG6 (1.8)	LRRC34 (1.3)	SIRT3 (1.2)	SLC38A1 (1.1)	EXPH5 (1.1)	ATM (1.0)	MYNN (1.0)	SLC38A2 (0.9)
ENSG00000136717	BIN1 PPI subnetwork	0.17	0.900598	CDC42 (4.0)	ENSG00000228397 (1.8)	RIC8A (1.5)	NPAT (1.5)	SH3PXD2A (1.1)	C11orf65 (1.1)	COG6 (1.0)	SALL1 (0.9)	KDELC2 (0.9)	WT1-AS (0.9)
GO:0019841	retinol binding	0.17	0.900598	SULT1B1 (1.5)	LRRC34 (1.5)	FIP1L1 (1.3)	TERT (1.3)	WNT4 (1.2)	GREB1 (1.2)	ENSG00000258096 (1.1)	SLC25A15 (0.9)	SALL1 (0.9)	OBFC1 (0.8)
ENSG00000163535	SGOL2 PPI subnetwork	0.17	0.900598	NPAT (1.9)	GREB1 (1.6)	SLC38A2 (1.5)	ATM (1.2)	KANK1 (1.0)	SIRT3 (1.0)	TNRC6B (0.9)	LINC00339 (0.7)	PSMD13 (0.7)	COG6 (0.6)
REACTOME_REMOVAL_OF_THE_FLAP_INTERMEDIATE	REACTOME_REMOVAL_OF_THE_FLAP_INTERMEDIATE	0.17	0.900598	NPAT (3.8)	OBFC1 (2.4)	KDELC2 (1.9)	ATM (1.9)	TERT (1.5)	LINC00339 (1.4)	ENSG00000228397 (1.1)	SLC38A2 (1.0)	MRPS31 (1.0)	UIMC1 (1.0)
ENSG00000177084	POLE PPI subnetwork	0.17	0.900598	NPAT (2.7)	FIP1L1 (2.5)	ATM (2.3)	SCGB1C1 (2.3)	ENSG00000228397 (2.2)	KDELC2 (1.8)	UIMC1 (1.4)	OBFC1 (1.1)	DMRT1 (1.1)	MRPS31 (1.0)
MP:0008097	increased plasma cell number	0.17	0.900598	CD44 (1.9)	HK3 (1.3)	SLC38A1 (1.2)	WT1-AS (0.9)	SYNE1 (0.8)	UIMC1 (0.8)	LNX1 (0.8)	ENSG00000258096 (0.7)	SCGB1C1 (0.7)	MRPS31 (0.6)
ENSG00000171314	PGAM1 PPI subnetwork	0.17	0.900598	CDC42 (2.5)	SLC38A1 (2.5)	SALL1 (2.2)	CD44 (1.9)	KANK1 (1.5)	C11orf65 (1.5)	SIRT3 (1.4)	OBFC1 (1.2)	WT1-AS (1.0)	PSMD13 (1.0)
MP:0005562	decreased mean corpuscular hemoglobin	0.17	0.900598	CDC42-IT1 (2.0)	HK3 (2.0)	SLC25A15 (1.6)	COG6 (1.4)	CD44 (1.3)	TNRC6B (1.1)	RIC8A (1.1)	SLC38A2 (1.0)	ZNF346 (0.9)	SYNE1 (0.9)
MP:0000097	short maxilla	0.17	0.900598	SALL1 (3.2)	SH3PXD2A (2.6)	CD44 (2.0)	LRRC34 (1.7)	LNX1 (1.7)	GREB1 (1.5)	ENSG00000258096 (1.4)	LRRC31 (1.4)	FOXO1 (1.4)	KANK1 (1.3)
REACTOME_INFLUENZA_VIRAL_RNA_TRANSCRIPTION_AND_REPLICATION	REACTOME_INFLUENZA_VIRAL_RNA_TRANSCRIPTION_AND_REPLICATION	0.17	0.900598	ENSG00000226403 (1.7)	SULT1B1 (1.5)	BET1L (1.3)	MYNN (1.2)	DMRT1 (1.1)	CDC42 (0.8)	WT1-AS (0.8)	LNX1 (0.7)	LRRC34 (0.7)	WNT4 (0.7)
ENSG00000171747	LGALS4 PPI subnetwork	0.17	0.900598	SULT1B1 (2.7)	CDC42-IT1 (2.5)	SCGB1C1 (2.5)	WT1-AS (1.9)	LRRC31 (1.9)	OBFC1 (1.9)	RIC8A (1.5)	WNT4 (1.2)	ODF3 (1.2)	CDC42 (1.2)
MP:0008965	increased basal metabolism	0.17	0.900598	LINC00339 (2.0)	SCGB1C1 (1.6)	OBFC1 (1.6)	SALL1 (1.5)	GREB1 (1.2)	CD44 (1.2)	SULT1B1 (1.2)	FOXO1 (0.9)	LNX1 (0.9)	ENSG00000228397 (0.9)
MP:0002231	abnormal primitive streak morphology	0.17	0.900598	SALL1 (3.9)	KANK1 (2.7)	ENSG00000184378 (2.1)	GREB1 (2.0)	EXPH5 (1.8)	SULT1B1 (1.3)	SLC25A15 (1.2)	TERT (1.2)	SCGB1C1 (1.1)	KDELC2 (1.0)
MP:0001883	mammary adenocarcinoma	0.17	0.900598	CDC42-IT1 (2.6)	CD44 (2.4)	TERT (2.1)	SLC25A15 (1.6)	DMRT1 (1.5)	CUL5 (1.5)	RIC8A (1.3)	NPAT (1.3)	BET1L (1.1)	SALL1 (0.9)
ENSG00000181222	POLR2A PPI subnetwork	0.17	0.900598	FIP1L1 (3.4)	UIMC1 (2.2)	PSMD13 (2.2)	MRPS31 (1.4)	CDC42-IT1 (1.4)	TNRC6B (1.4)	NPAT (1.3)	CUL5 (1.2)	CDC42 (1.2)	FOXO1 (1.0)
GO:0002200	somatic diversification of immune receptors	0.17	0.900598	FOXO1 (2.5)	ZNF346 (1.8)	ATM (1.6)	SCGB1C1 (1.5)	OBFC1 (1.4)	TERT (1.4)	MRPS31 (1.3)	ENSG00000258096 (1.3)	LRRC34 (1.3)	CUL5 (1.2)
ENSG00000092847	EIF2C1 PPI subnetwork	0.17	0.900598	SLC38A1 (3.2)	EXPH5 (2.1)	TNRC6B (2.1)	FIP1L1 (2.0)	FOXO1 (1.9)	ENSG00000228397 (1.3)	TERT (1.1)	ODF3 (1.1)	ZNF346 (1.0)	SULT1B1 (0.9)
GO:0018394	peptidyl-lysine acetylation	0.17	0.900598	TERT (2.0)	MYNN (1.9)	UIMC1 (1.9)	OBFC1 (1.7)	CDC42-IT1 (1.6)	LINC00339 (1.5)	EXPH5 (1.4)	TNRC6B (1.4)	NPAT (1.2)	FIP1L1 (1.2)
ENSG00000101365	IDH3B PPI subnetwork	0.17	0.900598	OBFC1 (2.5)	ACAT1 (2.4)	LRRC34 (1.5)	PSMD13 (1.4)	SH3PXD2A (1.3)	MRPS31 (1.1)	SCGB1C1 (1.0)	DMRT1 (0.9)	COG6 (0.9)	ENSG00000226403 (0.8)
ENSG00000170365	SMAD1 PPI subnetwork	0.17	0.900598	FOXO1 (3.4)	TNRC6B (3.2)	SALL1 (2.4)	NPAT (1.7)	RIC8A (1.6)	KANK1 (1.6)	ENSG00000228397 (0.9)	UIMC1 (0.9)	SLC38A2 (0.8)	SH3PXD2A (0.8)
REACTOME_MRNA_DECAY_BY_5_TO_3_EXORIBONUCLEASE	REACTOME_MRNA_DECAY_BY_5_TO_3_EXORIBONUCLEASE	0.17	0.900598	MYNN (2.3)	CUL5 (1.8)	MRPS31 (1.8)	TNRC6B (1.7)	C11orf65 (1.1)	DMRT1 (1.1)	NPAT (1.1)	UIMC1 (1.0)	ATM (1.0)	SULT1B1 (0.9)
MP:0001176	abnormal lung development	0.17	0.900598	WT1-AS (3.4)	ENSG00000226403 (1.7)	TNRC6B (1.6)	WNT4 (1.2)	MYNN (1.2)	SH3PXD2A (1.2)	SALL1 (0.9)	SLC38A1 (0.9)	SLC38A2 (0.8)	SLC25A15 (0.8)
GO:0010927	cellular component assembly involved in morphogenesis	0.17	0.900598	LRRC34 (2.9)	C11orf65 (2.1)	SYNE1 (1.9)	LINC00339 (1.8)	ENSG00000228397 (1.7)	OBFC1 (1.6)	SIRT3 (1.6)	WT1-AS (0.9)	ATM (0.8)	LRRC31 (0.8)
ENSG00000188488	SERPINA5 PPI subnetwork	0.17	0.900598	GREB1 (2.2)	OBFC1 (1.7)	ENSG00000258096 (1.6)	SYNE1 (1.1)	CD44 (1.1)	LNX1 (1.1)	DMRT1 (0.9)	C11orf65 (0.9)	ENSG00000184378 (0.6)	WNT4 (0.6)
ENSG00000084676	NCOA1 PPI subnetwork	0.17	0.900598	TNRC6B (4.0)	GREB1 (2.4)	CDC42 (2.1)	SH3PXD2A (1.9)	FOXO1 (1.8)	SALL1 (1.5)	LRRC31 (1.5)	WNT4 (1.3)	SLC25A15 (1.2)	ENSG00000184378 (1.2)
ENSG00000128513	POT1 PPI subnetwork	0.17	0.900598	BET1L (2.1)	ENSG00000228397 (2.1)	ZNF346 (1.6)	SCGB1C1 (1.5)	ENSG00000258096 (1.4)	DMRT1 (1.1)	CDC42-IT1 (1.0)	SYNE1 (1.0)	SLC38A1 (0.9)	RIC8A (0.9)
MP:0002016	ovary cysts	0.17	0.900598	GREB1 (4.5)	KANK1 (2.0)	ENSG00000258096 (1.9)	LNX1 (1.9)	ENSG00000226403 (1.7)	LINC00339 (1.6)	SIRT3 (1.5)	C11orf65 (1.2)	FOXO1 (1.1)	SALL1 (1.1)
MP:0005657	abnormal neural plate morphology	0.17	0.900598	TERT (3.1)	SALL1 (2.8)	ENSG00000228397 (1.7)	GREB1 (1.6)	SH3PXD2A (1.4)	KANK1 (1.2)	WNT4 (0.9)	TNRC6B (0.9)	LRRC34 (0.8)	ENSG00000258096 (0.8)
GO:0016763	transferase activity, transferring pentosyl groups	0.17	0.900598	LRRC34 (2.1)	SLC25A15 (1.8)	OBFC1 (1.7)	ENSG00000258096 (1.6)	ATM (1.5)	SH3PXD2A (1.5)	KDELC2 (1.4)	ENSG00000184378 (1.4)	SULT1B1 (1.4)	SALL1 (1.3)
ENSG00000105993	DNAJB6 PPI subnetwork	0.17	0.900598	SIRT3 (2.1)	PSMD13 (1.8)	OBFC1 (1.8)	DMRT1 (1.4)	ACAT1 (1.3)	SCGB1C1 (1.0)	WT1-AS (1.0)	MYNN (0.8)	COG6 (0.7)	MRPS31 (0.6)
ENSG00000183474	GTF2H2C PPI subnetwork	0.17	0.900598	MRPS31 (2.7)	ZNF346 (2.5)	TERT (2.4)	FIP1L1 (2.4)	CUL5 (1.9)	UIMC1 (1.9)	SLC25A15 (1.9)	ENSG00000184378 (1.8)	ODF3 (1.7)	ENSG00000228397 (1.6)
ENSG00000004897	CDC27 PPI subnetwork	0.17	0.900598	TERT (2.7)	COG6 (1.6)	MRPS31 (1.6)	FIP1L1 (1.4)	ATM (1.3)	LRRC34 (1.3)	MYNN (1.1)	UIMC1 (1.0)	PSMD13 (1.0)	KDELC2 (0.9)
MP:0005466	abnormal T-helper 2 physiology	0.17	0.900598	WT1-AS (1.7)	HK3 (1.5)	CD44 (1.5)	ZNF346 (1.1)	FOXO1 (1.1)	NPAT (1.0)	ENSG00000258096 (1.0)	SLC38A2 (1.0)	UIMC1 (0.8)	LNX1 (0.8)
ENSG00000065361	ERBB3 PPI subnetwork	0.17	0.900598	SALL1 (1.9)	SLC38A2 (1.5)	ENSG00000226403 (1.4)	SH3PXD2A (1.3)	MYNN (1.3)	KANK1 (1.2)	C11orf65 (1.1)	SYNE1 (1.0)	TNRC6B (1.0)	FOXO1 (1.0)
REACTOME_G1S_TRANSITION	REACTOME_G1S_TRANSITION	0.17	0.900598	PSMD13 (3.9)	NPAT (2.2)	MRPS31 (1.8)	KDELC2 (1.7)	CDC42 (1.3)	ZNF346 (1.2)	ENSG00000228397 (1.0)	UIMC1 (1.0)	ACAT1 (0.9)	ENSG00000258096 (0.9)
ENSG00000132964	CDK8 PPI subnetwork	0.17	0.900598	TNRC6B (3.3)	ENSG00000226403 (2.1)	CUL5 (1.9)	UIMC1 (1.7)	FIP1L1 (1.6)	NPAT (1.5)	MRPS31 (1.5)	ZNF346 (1.4)	DMRT1 (1.3)	CDC42-IT1 (1.2)
REACTOME_RNA_POLYMERASE_III_TRANSCRIPTION_INITIATION	REACTOME_RNA_POLYMERASE_III_TRANSCRIPTION_INITIATION	0.17	0.900598	RIC8A (2.4)	NPAT (2.1)	ZNF346 (2.0)	BET1L (1.7)	MRPS31 (1.3)	MYNN (1.3)	TERT (1.3)	DMRT1 (1.3)	PSMD13 (1.2)	KANK1 (1.1)
REACTOME_TOLL_LIKE_RECEPTOR_2_TLR2_CASCADE	REACTOME_TOLL_LIKE_RECEPTOR_2_TLR2_CASCADE	0.17	0.900598	CD44 (3.1)	CDC42-IT1 (2.3)	SULT1B1 (1.9)	CDC42 (1.4)	SALL1 (1.2)	LRRC31 (1.2)	HK3 (1.2)	OBFC1 (0.9)	SIRT3 (0.9)	FOXO1 (0.8)
REACTOME_MYD88MAL_CASCADE_INITIATED_ON_PLASMA_MEMBRANE	REACTOME_MYD88MAL_CASCADE_INITIATED_ON_PLASMA_MEMBRANE	0.17	0.900598	CD44 (3.1)	CDC42-IT1 (2.3)	SULT1B1 (1.9)	CDC42 (1.4)	SALL1 (1.2)	LRRC31 (1.2)	HK3 (1.2)	OBFC1 (0.9)	SIRT3 (0.9)	FOXO1 (0.8)
REACTOME_TOLL_LIKE_RECEPTOR_TLR1TLR2_CASCADE	REACTOME_TOLL_LIKE_RECEPTOR_TLR1TLR2_CASCADE	0.17	0.900598	CD44 (3.1)	CDC42-IT1 (2.3)	SULT1B1 (1.9)	CDC42 (1.4)	SALL1 (1.2)	LRRC31 (1.2)	HK3 (1.2)	OBFC1 (0.9)	SIRT3 (0.9)	FOXO1 (0.8)
REACTOME_TOLL_LIKE_RECEPTOR_TLR6TLR2_CASCADE	REACTOME_TOLL_LIKE_RECEPTOR_TLR6TLR2_CASCADE	0.17	0.900598	CD44 (3.1)	CDC42-IT1 (2.3)	SULT1B1 (1.9)	CDC42 (1.4)	SALL1 (1.2)	LRRC31 (1.2)	HK3 (1.2)	OBFC1 (0.9)	SIRT3 (0.9)	FOXO1 (0.8)
REACTOME_REGULATION_OF_INSULIN:LIKE_GROWTH_FACTOR_IGF_ACTIVITY_BY_INSULIN:LIKE_GROWTH_FACTOR_BINDING_PROTEINS_IGFBPS	REACTOME_REGULATION_OF_INSULIN:LIKE_GROWTH_FACTOR_IGF_ACTIVITY_BY_INSULIN:LIKE_GROWTH_FACTOR_BINDING_PROTEINS_IGFBPS	0.17	0.900598	WNT4 (3.7)	WT1-AS (2.4)	SH3PXD2A (2.2)	SALL1 (1.6)	GREB1 (1.4)	LINC00339 (1.3)	LRRC34 (1.2)	C11orf65 (1.1)	SIRT3 (1.0)	SULT1B1 (1.0)
ENSG00000121274	PAPD5 PPI subnetwork	0.17	0.900598	MRPS31 (2.9)	FIP1L1 (2.1)	TERT (1.7)	ACAT1 (1.6)	ATM (1.6)	SYNE1 (1.6)	KANK1 (1.5)	NPAT (1.4)	CUL5 (1.1)	OBFC1 (1.0)
GO:0071103	DNA conformation change	0.17	0.900598	ENSG00000228397 (3.2)	ENSG00000258096 (3.2)	ODF3 (2.3)	NPAT (2.1)	KDELC2 (1.9)	ZNF346 (1.8)	SCGB1C1 (1.6)	FIP1L1 (1.5)	UIMC1 (1.3)	CUL5 (1.2)
MP:0002948	abnormal neuron specification	0.17	0.900598	EXPH5 (2.6)	LRRC31 (2.5)	SALL1 (2.4)	LRRC34 (1.8)	TERT (1.7)	WNT4 (1.7)	C11orf65 (1.6)	SH3PXD2A (1.4)	SLC38A1 (1.1)	KDELC2 (1.1)
GO:0006278	RNA-dependent DNA replication	0.17	0.900598	ZNF346 (3.0)	TERT (2.8)	OBFC1 (2.7)	ATM (2.5)	CUL5 (2.3)	CDC42-IT1 (2.2)	NPAT (1.9)	UIMC1 (1.7)	ENSG00000258096 (1.2)	SLC38A1 (1.2)
MP:0009172	small pancreatic islets	0.17	0.900598	LRRC31 (2.7)	ENSG00000184378 (1.8)	TERT (1.4)	EXPH5 (1.3)	C11orf65 (1.3)	SALL1 (1.0)	ZNF346 (0.9)	ATM (0.7)	FIP1L1 (0.7)	LRRC34 (0.6)
REACTOME_PHASE_1_:_FUNCTIONALIZATION_OF_COMPOUNDS	REACTOME_PHASE_1_:_FUNCTIONALIZATION_OF_COMPOUNDS	0.17	0.900598	SULT1B1 (4.1)	EXPH5 (2.5)	SLC25A15 (1.7)	ODF3 (1.7)	DMRT1 (1.1)	MRPS31 (1.1)	LNX1 (1.1)	WNT4 (0.9)	ENSG00000226403 (0.9)	LRRC34 (0.8)
GO:0022625	cytosolic large ribosomal subunit	0.17	0.900598	BET1L (2.2)	LINC00339 (1.7)	SLC25A15 (1.5)	ENSG00000226403 (1.4)	SULT1B1 (1.3)	DMRT1 (1.2)	MYNN (1.1)	SH3PXD2A (0.9)	C11orf65 (0.9)	COG6 (0.7)
MP:0001501	abnormal sleep pattern	0.17	0.900598	CD44 (2.2)	GREB1 (2.0)	KANK1 (1.8)	SLC25A15 (1.3)	LNX1 (1.2)	SYNE1 (1.2)	WT1-AS (1.1)	LRRC31 (1.0)	CUL5 (0.9)	LINC00339 (0.9)
GO:0050817	coagulation	0.17	0.900598	SCGB1C1 (5.4)	C11orf65 (2.1)	SYNE1 (1.9)	HK3 (1.5)	LRRC34 (1.5)	SLC25A15 (1.3)	KDELC2 (1.2)	RIC8A (1.1)	CD44 (1.1)	ENSG00000226403 (1.0)
GO:0004623	phospholipase A2 activity	0.17	0.900598	KANK1 (3.8)	ENSG00000226403 (2.5)	SCGB1C1 (2.2)	LINC00339 (1.3)	DMRT1 (1.3)	CDC42-IT1 (1.3)	GREB1 (1.2)	WT1-AS (1.1)	HK3 (0.9)	SIRT3 (0.8)
GO:0006200	ATP catabolic process	0.17	0.900598	SCGB1C1 (2.4)	ACAT1 (2.1)	OBFC1 (1.9)	ATM (1.8)	ENSG00000228397 (1.6)	CUL5 (1.5)	SLC38A1 (1.3)	ENSG00000184378 (1.3)	ODF3 (1.3)	MRPS31 (1.2)
GO:0002020	protease binding	0.17	0.900598	WNT4 (2.6)	LNX1 (2.0)	GREB1 (2.0)	CD44 (1.7)	SLC25A15 (1.4)	TERT (1.2)	KANK1 (1.1)	RIC8A (1.0)	FOXO1 (1.0)	DMRT1 (0.9)
ENSG00000111602	TIMELESS PPI subnetwork	0.17	0.900598	NPAT (3.0)	KDELC2 (1.9)	ATM (1.3)	ENSG00000228397 (1.2)	ENSG00000184378 (1.2)	OBFC1 (1.1)	TERT (1.1)	MYNN (0.9)	DMRT1 (0.9)	RIC8A (0.9)
ENSG00000131069	ACSS2 PPI subnetwork	0.17	0.900598	SLC38A2 (2.7)	SLC38A1 (1.8)	ACAT1 (1.3)	KANK1 (1.2)	C11orf65 (1.1)	PSMD13 (1.0)	EXPH5 (1.0)	CDC42 (0.9)	HK3 (0.9)	ENSG00000228397 (0.8)
ENSG00000153046	CDYL PPI subnetwork	0.17	0.900598	ZNF346 (2.2)	ODF3 (2.1)	TNRC6B (1.3)	FIP1L1 (1.3)	SLC38A2 (1.2)	LNX1 (1.2)	ENSG00000228397 (1.0)	CUL5 (0.8)	MRPS31 (0.7)	COG6 (0.6)
GO:0008022	protein C-terminus binding	0.17	0.900598	ATM (2.2)	SYNE1 (2.0)	CUL5 (2.0)	ENSG00000228397 (1.9)	OBFC1 (1.7)	LNX1 (1.4)	FIP1L1 (1.3)	TNRC6B (1.3)	SH3PXD2A (1.2)	CDC42 (1.2)
MP:0011346	renal tubule atrophy	0.17	0.900598	DMRT1 (2.6)	ENSG00000226403 (2.4)	ACAT1 (1.7)	ENSG00000258096 (1.1)	SALL1 (1.0)	ODF3 (0.9)	SIRT3 (0.9)	WT1-AS (0.9)	WNT4 (0.8)	SYNE1 (0.8)
MP:0004901	decreased male germ cell number	0.17	0.900598	DMRT1 (4.5)	LRRC34 (2.1)	GREB1 (1.8)	UIMC1 (1.6)	OBFC1 (1.3)	FIP1L1 (1.1)	FOXO1 (1.1)	KDELC2 (1.0)	ENSG00000226403 (1.0)	ODF3 (1.0)
ENSG00000145715	RASA1 PPI subnetwork	0.17	0.900598	KANK1 (2.5)	RIC8A (2.5)	BET1L (1.5)	SH3PXD2A (1.5)	ENSG00000184378 (1.4)	OBFC1 (1.4)	HK3 (1.3)	EXPH5 (1.3)	LRRC34 (1.2)	WT1-AS (1.0)
MP:0000267	abnormal heart development	0.17	0.900598	SALL1 (3.6)	WT1-AS (2.1)	SH3PXD2A (1.9)	KANK1 (1.7)	TNRC6B (1.5)	SLC38A2 (1.5)	SLC38A1 (1.3)	FOXO1 (1.2)	SLC25A15 (1.1)	ENSG00000228397 (0.8)
ENSG00000164330	EBF1 PPI subnetwork	0.17	0.900598	SLC38A2 (3.9)	TNRC6B (3.3)	TERT (1.8)	SLC38A1 (1.7)	FOXO1 (1.3)	ATM (1.3)	WT1-AS (1.1)	KANK1 (1.1)	LRRC31 (0.9)	BET1L (0.8)
GO:0016072	rRNA metabolic process	0.17	0.900598	MRPS31 (2.4)	ENSG00000226403 (2.1)	FIP1L1 (1.8)	NPAT (1.8)	TERT (1.7)	RIC8A (1.6)	LINC00339 (1.4)	ATM (1.3)	UIMC1 (1.2)	SLC25A15 (1.2)
GO:0003682	chromatin binding	0.17	0.900598	TERT (2.7)	SALL1 (2.5)	FIP1L1 (2.2)	TNRC6B (2.1)	NPAT (1.9)	UIMC1 (1.4)	FOXO1 (1.4)	ATM (1.3)	SLC38A2 (1.3)	DMRT1 (1.2)
ENSG00000105325	FZR1 PPI subnetwork	0.17	0.900598	CDC42-IT1 (2.3)	KANK1 (2.1)	LNX1 (1.8)	COG6 (1.7)	KDELC2 (1.7)	TERT (1.5)	CUL5 (1.4)	MRPS31 (1.4)	FIP1L1 (1.3)	ACAT1 (1.2)
MP:0010403	atrial septal defect	0.17	0.900598	TNRC6B (2.5)	KDELC2 (2.4)	LRRC34 (2.1)	SYNE1 (1.6)	DMRT1 (1.6)	GREB1 (1.4)	SLC38A2 (1.3)	ENSG00000226403 (1.1)	EXPH5 (0.9)	ENSG00000258096 (0.9)
GO:0008629	induction of apoptosis by intracellular signals	0.17	0.900598	ENSG00000228397 (2.7)	NPAT (2.2)	ATM (1.8)	RIC8A (1.5)	TNRC6B (1.3)	KDELC2 (1.2)	LINC00339 (1.1)	ZNF346 (1.1)	FIP1L1 (1.0)	OBFC1 (0.9)
GO:0007098	centrosome cycle	0.17	0.900598	LINC00339 (2.5)	TERT (2.2)	NPAT (2.1)	KDELC2 (1.9)	ATM (1.8)	ENSG00000226403 (1.7)	OBFC1 (1.4)	CUL5 (1.3)	MYNN (1.3)	LRRC34 (1.3)
MP:0001633	poor circulation	0.17	0.900598	SULT1B1 (2.4)	ENSG00000258096 (1.8)	WT1-AS (1.6)	KANK1 (1.5)	ENSG00000184378 (1.4)	ODF3 (1.3)	ENSG00000228397 (1.2)	SALL1 (1.2)	BET1L (1.0)	ENSG00000226403 (1.0)
ENSG00000197265	GTF2E2 PPI subnetwork	0.17	0.900598	MRPS31 (3.1)	RIC8A (2.5)	FIP1L1 (2.3)	SLC25A15 (2.0)	PSMD13 (2.0)	BET1L (1.8)	WNT4 (1.7)	MYNN (1.6)	CDC42-IT1 (1.5)	NPAT (1.3)
GO:0072074	kidney mesenchyme development	0.17	0.900598	WT1-AS (6.8)	WNT4 (2.2)	SLC38A1 (1.5)	SCGB1C1 (1.4)	SLC38A2 (1.3)	ENSG00000228397 (1.3)	LRRC34 (1.2)	CDC42-IT1 (1.1)	TERT (1.1)	LINC00339 (1.1)
REACTOME_LOSS_OF_NLP_FROM_MITOTIC_CENTROSOMES	REACTOME_LOSS_OF_NLP_FROM_MITOTIC_CENTROSOMES	0.17	0.900598	OBFC1 (2.2)	LRRC34 (1.7)	CDC42-IT1 (1.7)	TERT (1.6)	ATM (1.5)	UIMC1 (1.3)	SIRT3 (1.3)	TNRC6B (1.1)	NPAT (0.9)	FIP1L1 (0.9)
REACTOME_LOSS_OF_PROTEINS_REQUIRED_FOR_INTERPHASE_MICROTUBULE_ORGANIZATIONFROM_THE_CENTROSOME	REACTOME_LOSS_OF_PROTEINS_REQUIRED_FOR_INTERPHASE_MICROTUBULE_ORGANIZATIONFROM_THE_CENTROSOME	0.17	0.900598	OBFC1 (2.2)	LRRC34 (1.7)	CDC42-IT1 (1.7)	TERT (1.6)	ATM (1.5)	UIMC1 (1.3)	SIRT3 (1.3)	TNRC6B (1.1)	NPAT (0.9)	FIP1L1 (0.9)
ENSG00000152944	MED21 PPI subnetwork	0.17	0.900598	FIP1L1 (2.6)	MRPS31 (2.3)	CUL5 (2.1)	BET1L (2.0)	UIMC1 (2.0)	NPAT (1.9)	CDC42-IT1 (1.9)	TNRC6B (1.6)	ZNF346 (1.5)	COG6 (1.3)
ENSG00000157916	RER1 PPI subnetwork	0.17	0.900598	MRPS31 (2.3)	ZNF346 (2.2)	COG6 (2.0)	UIMC1 (2.0)	SLC25A15 (1.5)	SH3PXD2A (1.5)	BET1L (1.5)	SALL1 (1.3)	MYNN (0.9)	WNT4 (0.8)
ENSG00000005884	ITGA3 PPI subnetwork	0.17	0.900598	CD44 (2.6)	KDELC2 (2.5)	RIC8A (1.7)	KANK1 (1.2)	BET1L (1.2)	WT1-AS (1.1)	ENSG00000226403 (1.1)	CDC42-IT1 (1.0)	SYNE1 (1.0)	CDC42 (0.9)
ENSG00000183072	NKX2-5 PPI subnetwork	0.17	0.900598	TNRC6B (2.9)	SH3PXD2A (2.6)	GREB1 (1.9)	SLC25A15 (1.7)	CDC42-IT1 (1.2)	KANK1 (0.9)	LRRC34 (0.7)	HK3 (0.7)	MRPS31 (0.6)	EXPH5 (0.5)
GO:0032508	DNA duplex unwinding	0.17	0.900598	OBFC1 (3.6)	ENSG00000228397 (3.0)	KDELC2 (2.9)	TERT (2.9)	NPAT (2.7)	MYNN (1.9)	CUL5 (1.9)	ATM (1.8)	COG6 (1.5)	UIMC1 (1.5)
GO:0032392	DNA geometric change	0.17	0.900598	OBFC1 (3.6)	ENSG00000228397 (3.0)	KDELC2 (2.9)	TERT (2.9)	NPAT (2.7)	MYNN (1.9)	CUL5 (1.9)	ATM (1.8)	COG6 (1.5)	UIMC1 (1.5)
ENSG00000089159	PXN PPI subnetwork	0.17	0.900598	CD44 (3.5)	TNRC6B (2.8)	CDC42 (2.6)	KANK1 (2.3)	RIC8A (1.9)	SH3PXD2A (1.9)	SYNE1 (1.7)	KDELC2 (1.7)	CDC42-IT1 (1.4)	PSMD13 (1.0)
GO:0035116	embryonic hindlimb morphogenesis	0.17	0.900598	LNX1 (2.4)	EXPH5 (1.7)	SCGB1C1 (1.7)	FIP1L1 (1.7)	ENSG00000228397 (1.6)	OBFC1 (1.5)	FOXO1 (1.5)	WNT4 (1.1)	TNRC6B (1.1)	TERT (1.0)
ENSG00000100387	RBX1 PPI subnetwork	0.17	0.900598	CUL5 (3.7)	ENSG00000184378 (2.7)	LNX1 (2.2)	PSMD13 (2.1)	CDC42 (1.7)	MYNN (1.7)	COG6 (1.7)	RIC8A (1.5)	NPAT (1.2)	SLC38A2 (1.2)
ENSG00000197903	HIST1H2BK PPI subnetwork	0.17	0.900598	SCGB1C1 (2.5)	ENSG00000228397 (2.1)	CDC42 (1.8)	FIP1L1 (1.4)	CDC42-IT1 (1.4)	UIMC1 (1.3)	DMRT1 (1.2)	ODF3 (1.2)	KDELC2 (1.2)	CUL5 (1.1)
GO:0010675	regulation of cellular carbohydrate metabolic process	0.17	0.900598	LINC00339 (2.6)	SIRT3 (1.9)	ZNF346 (1.9)	SLC25A15 (1.7)	LRRC31 (1.6)	TNRC6B (1.1)	OBFC1 (0.9)	COG6 (0.9)	MYNN (0.8)	FOXO1 (0.7)
GO:0007099	centriole replication	0.17	0.900598	TERT (3.2)	LRRC34 (2.1)	OBFC1 (2.1)	SCGB1C1 (1.9)	ATM (1.7)	MYNN (1.7)	NPAT (1.5)	SIRT3 (1.5)	CUL5 (1.3)	LINC00339 (1.0)
GO:0004437	inositol or phosphatidylinositol phosphatase activity	0.17	0.900598	COG6 (2.3)	CUL5 (2.0)	HK3 (1.8)	SLC25A15 (1.6)	NPAT (1.2)	CDC42-IT1 (1.2)	SYNE1 (1.1)	ACAT1 (1.1)	MRPS31 (1.0)	ATM (0.9)
GO:0005048	signal sequence binding	0.17	0.900598	COG6 (4.2)	BET1L (2.2)	GREB1 (2.0)	ZNF346 (1.7)	SLC25A15 (1.5)	KDELC2 (1.5)	C11orf65 (1.5)	TERT (1.4)	UIMC1 (1.2)	LNX1 (1.2)
ENSG00000111875	ASF1A PPI subnetwork	0.17	0.900598	ENSG00000228397 (3.6)	TNRC6B (1.9)	SCGB1C1 (1.5)	DMRT1 (1.5)	ENSG00000258096 (1.5)	NPAT (1.4)	KDELC2 (1.2)	ZNF346 (1.0)	BET1L (1.0)	ATM (0.8)
GO:0032675	regulation of interleukin-6 production	0.17	0.900598	HK3 (3.0)	LRRC34 (2.7)	ENSG00000184378 (1.7)	CD44 (1.4)	LINC00339 (1.3)	ENSG00000258096 (1.2)	SLC38A2 (1.1)	ODF3 (0.9)	COG6 (0.9)	EXPH5 (0.9)
ENSG00000125450	NUP85 PPI subnetwork	0.17	0.900598	NPAT (1.9)	KDELC2 (1.6)	ATM (1.3)	SLC38A2 (1.3)	TNRC6B (0.8)	COG6 (0.7)	KANK1 (0.7)	LINC00339 (0.6)	GREB1 (0.6)	FIP1L1 (0.6)
GO:0004842	ubiquitin-protein ligase activity	0.17	0.900598	MYNN (2.7)	ZNF346 (2.2)	FIP1L1 (2.1)	RIC8A (2.0)	NPAT (1.8)	LNX1 (1.8)	CUL5 (1.8)	SLC38A2 (1.8)	COG6 (1.6)	UIMC1 (1.5)
ENSG00000099942	CRKL PPI subnetwork	0.17	0.900598	TNRC6B (2.3)	KANK1 (1.7)	SLC38A2 (1.6)	SH3PXD2A (1.1)	GREB1 (1.1)	ENSG00000184378 (1.1)	WT1-AS (1.0)	FOXO1 (0.9)	ZNF346 (0.9)	LNX1 (0.7)
ENSG00000102145	GATA1 PPI subnetwork	0.17	0.900598	TNRC6B (2.8)	ENSG00000228397 (1.8)	ZNF346 (1.0)	UIMC1 (1.0)	SALL1 (0.8)	SH3PXD2A (0.8)	LNX1 (0.7)	CDC42-IT1 (0.7)	HK3 (0.7)	SLC38A1 (0.5)
REACTOME_PERK_REGULATED_GENE_EXPRESSION	REACTOME_PERK_REGULATED_GENE_EXPRESSION	0.17	0.900598	MRPS31 (4.3)	SLC38A2 (3.4)	LINC00339 (2.2)	SLC38A1 (2.0)	DMRT1 (1.8)	FIP1L1 (1.7)	SYNE1 (1.7)	C11orf65 (1.6)	BET1L (1.6)	MYNN (1.4)
MP:0001614	abnormal blood vessel morphology	0.17	0.900598	SALL1 (2.3)	SCGB1C1 (1.9)	SYNE1 (1.7)	SH3PXD2A (1.6)	FOXO1 (1.5)	TNRC6B (1.4)	CDC42-IT1 (1.3)	WNT4 (1.2)	GREB1 (1.2)	LINC00339 (1.0)
ENSG00000122861	PLAU PPI subnetwork	0.17	0.900598	CD44 (2.3)	GREB1 (1.6)	CUL5 (1.5)	DMRT1 (1.2)	SYNE1 (1.1)	TERT (0.9)	ODF3 (0.9)	KANK1 (0.9)	C11orf65 (0.8)	SALL1 (0.8)
GO:0043406	positive regulation of MAP kinase activity	0.17	0.900598	BET1L (2.2)	ENSG00000258096 (1.6)	LRRC31 (1.6)	TERT (1.4)	SIRT3 (1.3)	CD44 (1.1)	HK3 (1.1)	EXPH5 (1.0)	KANK1 (1.0)	RIC8A (0.9)
MP:0001552	increased circulating triglyceride level	0.17	0.900598	SLC25A15 (2.9)	FOXO1 (2.8)	ACAT1 (2.4)	KANK1 (2.0)	SULT1B1 (1.4)	SH3PXD2A (1.3)	SIRT3 (1.2)	GREB1 (1.0)	LRRC31 (0.8)	LNX1 (0.7)
ENSG00000087303	NID2 PPI subnetwork	0.17	0.900598	SH3PXD2A (3.4)	KDELC2 (2.1)	EXPH5 (2.1)	SALL1 (1.6)	C11orf65 (1.4)	SULT1B1 (1.3)	TERT (1.1)	SLC25A15 (1.1)	FOXO1 (1.0)	ENSG00000226403 (1.0)
ENSG00000100823	APEX1 PPI subnetwork	0.17	0.900598	LINC00339 (3.2)	ENSG00000184378 (2.5)	TNRC6B (2.1)	LRRC31 (1.9)	MYNN (1.3)	GREB1 (1.3)	FIP1L1 (1.3)	ATM (1.0)	CDC42 (0.9)	CDC42-IT1 (0.9)
ENSG00000153767	GTF2E1 PPI subnetwork	0.17	0.900598	RIC8A (2.7)	MRPS31 (2.6)	DMRT1 (2.5)	FIP1L1 (2.1)	PSMD13 (2.0)	NPAT (2.0)	BET1L (1.9)	TERT (1.4)	UIMC1 (1.3)	LRRC34 (1.2)
GO:0044257	cellular protein catabolic process	0.17	0.900598	MYNN (2.7)	CUL5 (2.4)	LNX1 (2.1)	COG6 (1.9)	CDC42 (1.9)	ZNF346 (1.7)	PSMD13 (1.6)	FIP1L1 (1.5)	UIMC1 (1.3)	SLC38A2 (1.3)
GO:0090263	positive regulation of canonical Wnt receptor signaling pathway	0.17	0.900598	SH3PXD2A (2.7)	EXPH5 (2.4)	ODF3 (1.9)	ENSG00000228397 (1.8)	C11orf65 (1.3)	WNT4 (1.2)	GREB1 (1.0)	CUL5 (0.9)	ZNF346 (0.9)	SALL1 (0.8)
GO:0004527	exonuclease activity	0.17	0.900598	ATM (3.4)	UIMC1 (2.3)	MRPS31 (2.3)	OBFC1 (2.0)	MYNN (1.5)	RIC8A (1.4)	KDELC2 (1.4)	NPAT (1.3)	LRRC31 (1.1)	FIP1L1 (1.1)
GO:0034724	DNA replication-independent nucleosome organization	0.17	0.900598	ENSG00000228397 (2.0)	NPAT (2.0)	ATM (1.9)	CUL5 (1.7)	KDELC2 (1.6)	ZNF346 (1.5)	ENSG00000258096 (1.4)	SCGB1C1 (1.3)	ENSG00000226403 (1.2)	FIP1L1 (1.0)
GO:0034080	CenH3-containing nucleosome assembly at centromere	0.17	0.900598	ENSG00000228397 (2.0)	NPAT (2.0)	ATM (1.9)	CUL5 (1.7)	KDELC2 (1.6)	ZNF346 (1.5)	ENSG00000258096 (1.4)	SCGB1C1 (1.3)	ENSG00000226403 (1.2)	FIP1L1 (1.0)
GO:0006336	DNA replication-independent nucleosome assembly	0.17	0.900598	ENSG00000228397 (2.0)	NPAT (2.0)	ATM (1.9)	CUL5 (1.7)	KDELC2 (1.6)	ZNF346 (1.5)	ENSG00000258096 (1.4)	SCGB1C1 (1.3)	ENSG00000226403 (1.2)	FIP1L1 (1.0)
ENSG00000104290	FZD3 PPI subnetwork	0.17	0.900598	WNT4 (5.5)	SH3PXD2A (2.9)	GREB1 (1.7)	C11orf65 (1.7)	TERT (1.7)	ENSG00000228397 (1.4)	DMRT1 (1.4)	ODF3 (1.3)	WT1-AS (1.2)	ENSG00000184378 (1.2)
MP:0000714	increased thymocyte number	0.17	0.900598	ENSG00000258096 (2.2)	FOXO1 (2.2)	DMRT1 (1.5)	SLC38A2 (1.4)	NPAT (1.3)	WNT4 (1.2)	LNX1 (1.2)	TNRC6B (1.1)	KDELC2 (0.9)	WT1-AS (0.8)
ENSG00000133740	E2F5 PPI subnetwork	0.17	0.900598	NPAT (3.6)	TNRC6B (2.3)	ZNF346 (2.0)	ATM (1.8)	LINC00339 (1.4)	FOXO1 (1.2)	SYNE1 (1.1)	UIMC1 (1.0)	MYNN (0.9)	KANK1 (0.8)
GO:0004012	phospholipid-translocating ATPase activity	0.17	0.900598	SYNE1 (2.5)	ODF3 (2.1)	SULT1B1 (2.1)	KANK1 (1.7)	ENSG00000228397 (1.7)	KDELC2 (1.6)	ATM (1.4)	LRRC31 (1.2)	HK3 (1.0)	MYNN (0.8)
ENSG00000062822	POLD1 PPI subnetwork	0.17	0.900598	OBFC1 (3.1)	NPAT (3.1)	LINC00339 (3.0)	ATM (2.9)	UIMC1 (2.0)	TERT (1.6)	KDELC2 (1.6)	MRPS31 (1.3)	LRRC31 (1.3)	ZNF346 (1.2)
MP:0003054	spina bifida	0.17	0.900598	SALL1 (2.7)	DMRT1 (2.0)	SH3PXD2A (1.7)	SLC25A15 (1.6)	ENSG00000226403 (1.3)	ENSG00000228397 (1.3)	KANK1 (1.3)	TNRC6B (1.3)	ZNF346 (1.3)	TERT (1.1)
ENSG00000177455	CD19 PPI subnetwork	0.17	0.900598	WT1-AS (2.6)	CD44 (2.6)	C11orf65 (2.4)	TNRC6B (2.0)	ATM (1.8)	SLC38A1 (1.7)	RIC8A (1.3)	ODF3 (1.3)	LNX1 (1.0)	FOXO1 (0.9)
ENSG00000161970	RPL26 PPI subnetwork	0.17	0.900598	CDC42 (1.5)	ENSG00000226403 (1.3)	CDC42-IT1 (1.2)	KDELC2 (1.1)	SULT1B1 (1.0)	FIP1L1 (1.0)	SLC38A2 (0.9)	RIC8A (0.9)	LRRC34 (0.8)	SLC38A1 (0.8)
ENSG00000086758	HUWE1 PPI subnetwork	0.17	0.900598	PSMD13 (5.1)	MYNN (1.4)	CDC42-IT1 (1.3)	DMRT1 (1.3)	MRPS31 (1.1)	FIP1L1 (1.1)	ZNF346 (1.0)	SLC38A2 (0.9)	ACAT1 (0.8)	ENSG00000184378 (0.8)
ENSG00000012061	ERCC1 PPI subnetwork	0.17	0.900598	LINC00339 (3.6)	OBFC1 (2.8)	MRPS31 (2.7)	RIC8A (2.2)	FIP1L1 (2.0)	ATM (1.9)	KDELC2 (1.9)	ZNF346 (1.5)	ACAT1 (1.5)	TERT (1.4)
GO:0016620	oxidoreductase activity, acting on the aldehyde or oxo group of donors, NAD or NADP as acceptor	0.18	0.900598	ACAT1 (2.8)	HK3 (1.9)	ODF3 (1.8)	SLC25A15 (1.7)	TERT (1.6)	SIRT3 (1.4)	KANK1 (1.4)	COG6 (1.2)	EXPH5 (1.1)	SLC38A1 (1.0)
ENSG00000156697	UTP14A PPI subnetwork	0.18	0.900598	FIP1L1 (3.1)	UIMC1 (2.6)	ATM (1.7)	SLC25A15 (1.7)	KANK1 (1.6)	MRPS31 (1.5)	BET1L (1.3)	RIC8A (1.2)	MYNN (0.9)	ENSG00000226403 (0.8)
ENSG00000120837	NFYB PPI subnetwork	0.18	0.900598	LINC00339 (2.5)	TERT (2.2)	MYNN (2.1)	ATM (1.9)	MRPS31 (1.5)	FIP1L1 (1.4)	SLC38A1 (1.3)	SLC38A2 (1.2)	DMRT1 (1.2)	ACAT1 (1.1)
MP:0008788	abnormal fetal cardiomyocyte morphology	0.18	0.900598	SLC38A2 (2.5)	SLC38A1 (1.9)	ENSG00000184378 (1.9)	TNRC6B (1.8)	WT1-AS (1.6)	KDELC2 (1.5)	LRRC34 (1.1)	CUL5 (1.1)	ODF3 (1.0)	ATM (0.7)
GO:0051090	regulation of sequence-specific DNA binding transcription factor activity	0.18	0.900598	ENSG00000184378 (1.7)	SLC38A2 (1.5)	DMRT1 (1.2)	SH3PXD2A (1.2)	SLC38A1 (1.1)	LRRC31 (1.1)	TNRC6B (1.0)	CD44 (0.9)	TERT (0.8)	MYNN (0.7)
[truncated: 8,969 more rows]

## Sheet: Tissue enrichment
MeSH term	Name	MeSH first level term	MeSH second level term	Nominal P value	FDR	Tissue-specific expression Z score gene 1	Tissue-specific expression Z score gene 2	Tissue-specific expression Z score gene 3	Tissue-specific expression Z score gene 4	Tissue-specific expression Z score gene 5	Tissue-specific expression Z score gene 6	Tissue-specific expression Z score gene 7	Tissue-specific expression Z score gene 8	Tissue-specific expression Z score gene 9	Tissue-specific expression Z score gene 10
A15.382.490.555.567	Lymphocytes	Hemic and Immune Systems	Immune System	0.04	0.884231	NPAT (2.2)	ENSG00000228397 (2.0)	BET1L (1.9)	ATM (1.8)	MRPS31 (1.5)	UIMC1 (1.2)	SLC38A1 (1.2)	C11orf65 (1.2)	TERT (1.0)	MYNN (1.0)
A11.118.637.555.567.569	T Lymphocytes	Cells	Blood Cells	0.04	0.884231	ATM (3.0)	NPAT (2.9)	ENSG00000228397 (2.0)	CDC42-IT1 (1.9)	SLC38A1 (1.6)	FIP1L1 (1.3)	ZNF346 (1.3)	TNRC6B (1.2)	FOXO1 (1.2)	OBFC1 (1.1)
A05.360.319.679.490	Endometrium	Urogenital System	Genitalia	0.05	0.884231	SALL1 (2.7)	GREB1 (2.2)	WT1-AS (1.7)	LRRC31 (1.2)	WNT4 (1.0)	EXPH5 (0.9)	KANK1 (0.7)	KDELC2 (0.7)	SH3PXD2A (0.5)	CDC42-IT1 (0.4)
A05.360.319.679	Uterus	Urogenital System	Genitalia	0.05	0.884231	SALL1 (2.2)	WT1-AS (1.7)	GREB1 (1.5)	KDELC2 (0.7)	LRRC31 (0.7)	EXPH5 (0.6)	SH3PXD2A (0.6)	KANK1 (0.6)	WNT4 (0.5)	FOXO1 (0.5)
A11.627.340.360	Granulocyte Precursor Cells	Cells	Myeloid Cells	0.05	0.884231	HK3 (2.8)	LRRC34 (2.6)	PSMD13 (1.8)	MYNN (1.7)	WT1-AS (1.7)	LINC00339 (1.5)	ACAT1 (1.4)	ENSG00000228397 (1.2)	CDC42 (1.1)	UIMC1 (1.1)
A05.360.319.679.690	Myometrium	Urogenital System	Genitalia	0.05	0.884231	WT1-AS (4.0)	GREB1 (2.7)	FOXO1 (2.4)	KDELC2 (1.8)	SALL1 (1.6)	SH3PXD2A (1.1)	SYNE1 (1.1)	KANK1 (1.0)	UIMC1 (0.8)	CD44 (0.7)
A15.382.490.555.567.537	Killer Cells Natural	Hemic and Immune Systems	Immune System	0.06	0.884231	ATM (2.5)	FIP1L1 (2.2)	NPAT (1.9)	ENSG00000228397 (1.8)	MYNN (1.8)	DMRT1 (1.7)	CDC42-IT1 (1.6)	OBFC1 (1.6)	SLC38A1 (1.4)	UIMC1 (1.1)
A05.360.319	Genitalia Female	Urogenital System	Genitalia	0.07	0.884231	WT1-AS (2.4)	GREB1 (1.3)	SALL1 (1.0)	EXPH5 (0.7)	DMRT1 (0.6)	SLC38A2 (0.5)	CDC42-IT1 (0.5)	KDELC2 (0.4)	KANK1 (0.4)	ENSG00000184378 (0.4)
A15.145.229.637.555.567.569.200	CD4 Positive T Lymphocytes	Hemic and Immune Systems	Blood	0.07	0.884231	ENSG00000228397 (2.9)	ATM (2.9)	FOXO1 (2.8)	SLC38A1 (2.2)	OBFC1 (2.0)	NPAT (2.0)	CDC42 (1.6)	TNRC6B (1.6)	UIMC1 (1.5)	CDC42-IT1 (1.5)
A15.382.520.604.800	Palatine Tonsil	Hemic and Immune Systems	Immune System	0.07	0.884231	ATM (3.2)	NPAT (2.2)	C11orf65 (2.0)	SLC38A1 (1.9)	CDC42-IT1 (1.6)	FOXO1 (1.6)	ZNF346 (1.3)	TNRC6B (1.2)	PSMD13 (1.0)	MRPS31 (1.0)
A04.623.603	Oropharynx	Respiratory System	Pharynx	0.07	0.884231	ATM (3.2)	NPAT (2.2)	C11orf65 (2.0)	SLC38A1 (1.9)	CDC42-IT1 (1.6)	FOXO1 (1.6)	ZNF346 (1.3)	TNRC6B (1.2)	PSMD13 (1.0)	MRPS31 (1.0)
A11.118.637.555.567.569.200.700	T Lymphocytes Regulatory	Cells	Blood Cells	0.08	0.884231	ATM (2.9)	FOXO1 (2.9)	ENSG00000228397 (2.5)	NPAT (2.2)	CDC42 (2.1)	SLC38A1 (2.0)	OBFC1 (2.0)	CDC42-IT1 (1.9)	TNRC6B (1.9)	UIMC1 (1.6)
A10.165.450	Granulation Tissue	Tissues	Connective Tissue	0.09	0.884231	SH3PXD2A (3.8)	SLC38A2 (2.3)	RIC8A (2.2)	ODF3 (2.0)	SLC38A1 (2.0)	KDELC2 (1.6)	LINC00339 (1.6)	SYNE1 (1.6)	COG6 (1.4)	CD44 (1.2)
A10.165.450.300	Cicatrix	Tissues	Connective Tissue	0.09	0.884231	SH3PXD2A (3.8)	SLC38A2 (2.3)	RIC8A (2.2)	ODF3 (2.0)	SLC38A1 (2.0)	KDELC2 (1.6)	LINC00339 (1.6)	SYNE1 (1.6)	COG6 (1.4)	CD44 (1.2)
A06.407.312	Gonads	Endocrine System	Endocrine Glands	0.09	0.884231	WT1-AS (3.1)	DMRT1 (1.5)	GREB1 (1.1)	MYNN (0.8)	C11orf65 (0.8)	ENSG00000184378 (0.7)	SLC38A2 (0.6)	EXPH5 (0.6)	CDC42-IT1 (0.6)	ZNF346 (0.3)
A05.360.319.114	Adnexa Uteri	Urogenital System	Genitalia	0.11	0.884231	WT1-AS (3.1)	GREB1 (1.1)	DMRT1 (0.9)	MYNN (0.8)	CDC42-IT1 (0.7)	EXPH5 (0.7)	ENSG00000184378 (0.6)	SLC38A2 (0.6)	C11orf65 (0.5)	ZNF346 (0.3)
A05.360.319.114.630	Ovary	Urogenital System	Genitalia	0.11	0.884231	WT1-AS (3.1)	GREB1 (1.1)	DMRT1 (0.9)	MYNN (0.8)	CDC42-IT1 (0.7)	EXPH5 (0.7)	ENSG00000184378 (0.6)	SLC38A2 (0.6)	C11orf65 (0.5)	ZNF346 (0.3)
A05.360.319.114.373	Fallopian Tubes	Urogenital System	Genitalia	0.12	0.884231	WT1-AS (4.2)	MYNN (1.2)	ENSG00000184378 (1.0)	EXPH5 (0.9)	SLC38A2 (0.9)	CDC42-IT1 (0.8)	GREB1 (0.7)	ZNF346 (0.7)	ATM (0.6)	C11orf65 (0.6)
A11.063	Antibody Producing Cells	Cells	Antibody-Producing Cells	0.12	0.884231	BET1L (3.2)	ENSG00000228397 (2.2)	C11orf65 (2.0)	NPAT (1.8)	ENSG00000226403 (1.7)	MRPS31 (1.7)	KANK1 (1.7)	TERT (1.4)	WNT4 (1.3)	UIMC1 (1.2)
A11.118.637.555.567.562	B Lymphocytes	Cells	Blood Cells	0.12	0.884231	BET1L (3.2)	ENSG00000228397 (2.2)	C11orf65 (2.0)	NPAT (1.8)	ENSG00000226403 (1.7)	MRPS31 (1.7)	KANK1 (1.7)	TERT (1.4)	WNT4 (1.3)	UIMC1 (1.2)
A05.360	Genitalia	Urogenital System	Genitalia	0.13	0.884231	WT1-AS (1.5)	GREB1 (1.2)	SALL1 (0.8)	EXPH5 (0.6)	KDELC2 (0.6)	MYNN (0.5)	DMRT1 (0.5)	C11orf65 (0.4)	SH3PXD2A (0.4)	SLC38A2 (0.4)
A06.407	Endocrine Glands	Endocrine System	Endocrine Glands	0.13	0.884231	WT1-AS (2.3)	DMRT1 (1.2)	GREB1 (0.8)	C11orf65 (0.6)	MYNN (0.6)	ENSG00000184378 (0.5)	SLC38A2 (0.5)	CDC42-IT1 (0.4)	EXPH5 (0.4)	ZNF346 (0.3)
A15.145	Blood	Hemic and Immune Systems	Blood	0.15	0.884231	CDC42-IT1 (2.2)	ATM (2.1)	HK3 (2.0)	UIMC1 (1.5)	ENSG00000228397 (1.4)	TNRC6B (1.3)	CDC42 (1.2)	NPAT (1.1)	CD44 (0.9)	SULT1B1 (0.8)
A11.329.830	Stromal Cells	Cells	Connective Tissue Cells	0.15	0.884231	TERT (2.4)	ENSG00000184378 (2.4)	SH3PXD2A (2.4)	RIC8A (2.3)	FIP1L1 (2.2)	COG6 (1.7)	PSMD13 (1.6)	SLC38A2 (1.5)	CD44 (1.3)	BET1L (1.3)
A11.118.637.555.567.562.440	Precursor Cells B Lymphoid	Cells	Blood Cells	0.15	0.884231	UIMC1 (3.0)	CDC42-IT1 (3.0)	CDC42 (2.6)	NPAT (2.5)	ATM (2.4)	MYNN (2.4)	FOXO1 (2.2)	FIP1L1 (1.8)	ENSG00000228397 (1.8)	ZNF346 (1.8)
A11.872.378.294	Lymphoid Progenitor Cells	Cells	Stem Cells	0.15	0.884231	UIMC1 (3.0)	CDC42-IT1 (3.0)	CDC42 (2.6)	NPAT (2.5)	ATM (2.4)	MYNN (2.4)	FOXO1 (2.2)	FIP1L1 (1.8)	ENSG00000228397 (1.8)	ZNF346 (1.8)
A11.872.040	Adult Stem Cells	Cells	Stem Cells	0.15	0.884231	SALL1 (2.4)	SLC25A15 (1.9)	FIP1L1 (1.9)	ENSG00000184378 (1.8)	DMRT1 (1.7)	MRPS31 (1.5)	PSMD13 (1.5)	LRRC34 (1.3)	MYNN (1.2)	SLC38A1 (1.2)
A11.118.637.415	Granulocytes	Cells	Blood Cells	0.16	0.884231	CDC42-IT1 (4.8)	UIMC1 (3.1)	SULT1B1 (3.1)	HK3 (3.1)	TNRC6B (2.5)	ENSG00000258096 (2.0)	TERT (1.6)	ATM (1.5)	ODF3 (1.4)	CDC42 (1.2)
A10.165.450.300.425	Keloid	Tissues	Connective Tissue	0.16	0.884231	SH3PXD2A (4.3)	SLC38A2 (2.2)	RIC8A (2.2)	SYNE1 (2.2)	SLC38A1 (1.9)	ODF3 (1.9)	COG6 (1.7)	KDELC2 (1.6)	LINC00339 (1.6)	CD44 (1.0)
A06.407.312.782	Testis	Endocrine System	Endocrine Glands	0.17	0.884231	DMRT1 (11.4)	C11orf65 (6.3)	WT1-AS (3.8)	COG6 (3.2)	MYNN (2.0)	FIP1L1 (1.6)	ENSG00000184378 (1.3)	PSMD13 (1.2)	KDELC2 (1.2)	SLC25A15 (1.1)
A15.382.490.315.583	Neutrophils	Hemic and Immune Systems	Immune System	0.17	0.884231	CDC42-IT1 (5.3)	UIMC1 (3.4)	SULT1B1 (3.3)	HK3 (3.1)	TNRC6B (2.7)	ENSG00000258096 (2.2)	TERT (1.7)	ATM (1.6)	ODF3 (1.5)	CDC42 (1.2)
A15.382.520.604.700	Spleen	Hemic and Immune Systems	Immune System	0.18	0.884231	DMRT1 (1.8)	NPAT (1.5)	ATM (1.5)	LINC00339 (1.4)	HK3 (1.0)	MRPS31 (0.9)	ENSG00000228397 (0.9)	FIP1L1 (0.8)	SYNE1 (0.7)	ZNF346 (0.6)
A15.145.229	Blood Cells	Hemic and Immune Systems	Blood	0.18	0.884231	HK3 (1.9)	ATM (1.7)	CDC42-IT1 (1.7)	NPAT (1.6)	ENSG00000228397 (1.4)	UIMC1 (1.3)	CDC42 (1.0)	BET1L (0.9)	TNRC6B (0.9)	CD44 (0.9)
A11.329.228	Fibroblasts	Cells	Connective Tissue Cells	0.19	0.884231	SH3PXD2A (2.4)	ENSG00000184378 (2.3)	COG6 (1.9)	RIC8A (1.9)	FIP1L1 (1.9)	SLC38A2 (1.9)	KDELC2 (1.6)	SALL1 (1.4)	CD44 (1.2)	BET1L (1.1)
A15.145.693	Plasma	Hemic and Immune Systems	Blood	0.19	0.884231	BET1L (4.2)	KANK1 (2.7)	ENSG00000226403 (2.7)	C11orf65 (2.3)	MRPS31 (2.2)	ENSG00000228397 (2.1)	WNT4 (2.1)	TERT (1.7)	NPAT (1.5)	ENSG00000258096 (1.5)
A15.145.229.637.555.567.562.725	Plasma Cells	Hemic and Immune Systems	Blood	0.19	0.884231	BET1L (4.3)	KANK1 (2.8)	ENSG00000226403 (2.7)	C11orf65 (2.3)	MRPS31 (2.2)	ENSG00000228397 (2.1)	WNT4 (2.1)	TERT (1.7)	ENSG00000258096 (1.5)	NPAT (1.5)
A15.382.490.555.567.622	Lymphocytes Null	Hemic and Immune Systems	Immune System	0.21	0.884231	DMRT1 (5.2)	MRPS31 (2.4)	ENSG00000228397 (2.2)	PSMD13 (2.0)	FIP1L1 (1.9)	OBFC1 (1.4)	ZNF346 (1.4)	NPAT (1.3)	TERT (1.2)	SLC25A15 (1.2)
A07.541.358.100	Atrial Appendage	Cardiovascular System	Heart	0.22	0.884231	ENSG00000226403 (2.9)	CUL5 (2.7)	ACAT1 (2.1)	KANK1 (1.9)	MRPS31 (1.6)	TNRC6B (1.4)	OBFC1 (1.2)	MYNN (1.2)	SIRT3 (1.2)	LNX1 (1.1)
A02.835	Skeleton	Musculoskeletal System	Skeleton	0.22	0.884231	ENSG00000228397 (1.6)	TERT (1.4)	CDC42 (1.4)	ENSG00000258096 (1.3)	CDC42-IT1 (1.2)	UIMC1 (1.2)	WT1-AS (1.1)	ENSG00000226403 (0.9)	BET1L (0.8)	SLC38A1 (0.8)
A05.810.453.324	Kidney Cortex	Urogenital System	Urinary Tract	0.22	0.884231	SALL1 (3.3)	ODF3 (2.4)	SLC25A15 (1.7)	ENSG00000228397 (1.6)	MRPS31 (1.5)	SLC38A1 (1.1)	EXPH5 (1.0)	KANK1 (0.9)	TNRC6B (0.8)	ENSG00000258096 (0.8)
A10.165	Connective Tissue	Tissues	Connective Tissue	0.22	0.884231	ENSG00000228397 (1.5)	TERT (1.4)	CDC42 (1.3)	CDC42-IT1 (1.2)	ENSG00000258096 (1.2)	UIMC1 (1.2)	WT1-AS (1.1)	ENSG00000226403 (0.9)	BET1L (0.7)	SLC38A1 (0.7)
A02.835.232	Bone and Bones	Musculoskeletal System	Skeleton	0.23	0.884231	ENSG00000228397 (1.6)	TERT (1.5)	CDC42 (1.4)	ENSG00000258096 (1.3)	CDC42-IT1 (1.3)	UIMC1 (1.3)	WT1-AS (1.1)	ENSG00000226403 (1.0)	SLC38A1 (0.8)	BET1L (0.8)
A07.541.358	Heart Atria	Cardiovascular System	Heart	0.24	0.884231	ENSG00000226403 (3.0)	CUL5 (2.5)	KANK1 (2.0)	ACAT1 (1.9)	MRPS31 (1.6)	TNRC6B (1.4)	SIRT3 (1.2)	OBFC1 (1.1)	LNX1 (1.0)	WT1-AS (0.9)
A11.118.637	Leukocytes	Cells	Blood Cells	0.24	0.884231	ENSG00000228397 (1.6)	CDC42-IT1 (1.5)	HK3 (1.5)	NPAT (1.4)	UIMC1 (1.4)	BET1L (1.3)	TERT (1.2)	ENSG00000258096 (1.2)	ATM (1.1)	CDC42 (1.0)
A07.231.908	Veins	Cardiovascular System	Blood Vessels	0.24	0.884231	SULT1B1 (4.0)	COG6 (2.1)	ENSG00000184378 (2.0)	PSMD13 (1.8)	RIC8A (1.6)	ENSG00000228397 (1.5)	LINC00339 (1.3)	SLC38A2 (1.0)	SLC25A15 (1.0)	ZNF346 (1.0)
A07.231.114	Arteries	Cardiovascular System	Blood Vessels	0.24	0.884231	SLC38A2 (1.2)	KDELC2 (1.1)	KANK1 (0.8)	SYNE1 (0.8)	SULT1B1 (0.7)	UIMC1 (0.7)	ENSG00000184378 (0.6)	RIC8A (0.6)	ENSG00000228397 (0.6)	BET1L (0.6)
A15.382.216	Bone Marrow	Hemic and Immune Systems	Immune System	0.24	0.884231	ENSG00000228397 (1.9)	TERT (1.8)	CDC42 (1.6)	ENSG00000258096 (1.6)	CDC42-IT1 (1.5)	UIMC1 (1.5)	WT1-AS (1.3)	ENSG00000226403 (1.2)	SLC38A1 (0.9)	BET1L (0.9)
A10.690.467	Muscle Smooth	Tissues	Muscles	0.25	0.884231	RIC8A (1.8)	KDELC2 (1.6)	ENSG00000184378 (1.6)	LINC00339 (1.6)	WT1-AS (1.5)	COG6 (1.4)	SLC38A2 (1.3)	SULT1B1 (1.2)	CD44 (1.1)	ODF3 (1.1)
A07.231.908.670	Portal System	Cardiovascular System	Blood Vessels	0.26	0.884231	SULT1B1 (4.3)	COG6 (2.4)	ENSG00000184378 (2.2)	PSMD13 (1.8)	RIC8A (1.7)	ENSG00000228397 (1.6)	LINC00339 (1.3)	SLC38A2 (1.2)	SLC25A15 (1.1)	BET1L (1.0)
A07.231.908.670.874	Umbilical Veins	Cardiovascular System	Blood Vessels	0.26	0.884231	SULT1B1 (4.3)	COG6 (2.4)	ENSG00000184378 (2.2)	PSMD13 (1.8)	RIC8A (1.7)	ENSG00000228397 (1.6)	LINC00339 (1.3)	SLC38A2 (1.2)	SLC25A15 (1.1)	BET1L (1.0)
A02.835.232.834.151	Cervical Vertebrae	Musculoskeletal System	Skeleton	0.27	0.884231	ENSG00000184378 (1.6)	FIP1L1 (1.2)	SLC25A15 (1.2)	COG6 (1.1)	SLC38A2 (1.1)	MYNN (1.1)	LRRC34 (1.0)	SALL1 (0.9)	RIC8A (0.9)	KDELC2 (0.9)
[truncated: 158 more rows]
